# Supplementary material for: Transcription elongation is finely tuned by dozens of regulatory factors
Source: eLife. 2022 May 16;11:e78944. doi: 10.7554/eLife.78944 (PMC9154744; doi:10.7554/eLife.78944)
Supplement: Supplementary file 1. [file elife-78944-supp1.xlsx]

## Sheet: Table S1
Table S1. Pairwise correlation between all replicates included in reverse genetic screen.	Supplemental File 1. Pairwise correlation between all replicates included in reverse genetic screen.
	Deletion Strain	Replicate #1	Replicate #2	Separate People?	Different Date?	Pearson Correlation
	bre1∆	bre1-1	bre1-2	*	*	0.9801
		bre1-1	bre1-3			0.9604
		bre1-2	bre1-3		*	0.9604
	bur2∆	bur2-1	bur2-2	*	*	0.81
	bye1∆	bye1-1	bye2-1	*	*	0.93
	cac1∆	cac1-1	cac1-2			0.8464
	cac2∆	cac2-1	cac2-2			0.8649
	cac3∆	cac3-1	cac3-2			0.7744
	cbc1∆	cbc1-1	cbc1-2	*	*	0.81
		cbc1-1	cbc1-3	*	*	0.9801
		cbc1-2	cbc1-3			0.7569
	ccr4∆	ccr4-1	ccr4-2	*	*	0.96
	cdc39∆	cdc39-1	cdc39-2	*	*	0.8836
	cdc73∆	cdc73-1	cdc73-2		*	0.9604
		cdc73-1	cdc73-3	*		0.9409
		cdc73-1	cdc73-4	*		0.9604
		cdc73-2	cdc73-3	*		0.9216
		cdc73-2	cdc73-4	*		0.9409
		cdc73-3	cdc73-4		*	0.9409
	chd1∆	chd1-1	chd1-2	*	*	0.9801
		chd1-1	chd1-3	*		0.9604
		chd1-1	chd1-4	*	*	0.9801
		chd1-2	chd1-3			0.9604
		chd1-2	chd1-4	*	*	0.9801
		chd1-3	chd1-4	*	*	0.9409
	ctr9∆	ctr9-1	ctr9-2	*	*	0.9216
		ctr9-1	ctr9-3	*		0.9409
		ctr9-1	ctr9-4	*		0.9409
		ctr9-2	ctr9-3	*	*	0.9216
		ctr9-2	ctr9-4	*	*	0.9409
		ctr9-3	ctr9-4			0.9604
	dhh1∆	dhh1-1	dhh1-2	*	*	0.8281
	dst1∆	dst1-1	dst1-2	*	*	0.92
	eaf1∆	eaf1-1	eaf1-2	*	*	0.9801
		eaf1-1	eaf1-3	*	*	0.9801
		eaf1-1	eaf1-4			0.9801
		eaf1-2	eaf1-3		*	0.9801
		eaf1-2	eaf1-4	*		0.9409
		eaf1-3	eaf1-4	*	*	0.9604
	elf1∆	elf1-1	elf1-2	*		0.9216
	gcn5∆	gcn5-1	gcn5-2	*		0.81
		gcn5-1	gcn5-3	*	*	0.8649
		gcn5-1	gcn5-4	*	*	0.9025
		gcn5-2	gcn5-3	*	*	0.9216
		gcn5-2	gcn5-4			0.8649
		gcn5-3	gcn5-4	*	*	0.9409
	Deletion Strain	Replicate #1	Replicate #2	Separate People?	Different Date?	Pearson Correlation
	hda1∆	hda1-1	hda1-2	*		0.9801
		hda1-1	hda1-3	*	*	0.9801
		hda1-1	hda1-4	*	*	0.9409
		hda1-1	hda1-5	*	*	0.9216
		hda1-1	hda1-6		*	0.9409
		hda1-2	hda1-3		*	0.9801
		hda1-2	hda1-4	*	*	0.9409
		hda1-2	hda1-5	*	*	0.9409
		hda1-2	hda1-6	*	*	0.9025
		hda1-3	hda1-4	*	*	0.9409
		hda1-3	hda1-5	*	*	0.9409
		hda1-3	hda1-6	*		0.9604
		hda1-4	hda1-5			0.9604
		hda1-4	hda1-6	*	*	0.9409
		hda1-5	hda1-6	*	*	0.8836
	hpc2∆	hpc2-1	hpc2-2	*		0.9801
	htz1∆	htz1-1	htz1-2	*	*	0.99
	ino80∆	ino80-1	ino80-2		*	0.9801
		ino80-1	ino80-3			0.9604
		ino80-1	ino80-4	*	*	0.9409
		ino80-2	ino80-3			0.9604
		ino80-2	ino80-4	*	*	0.9409
		ino80-3	ino80-4	*	*	0.9801
	isw1∆	isw1-1	isw1-2	*	*	0.99
	isw2∆	isw2-1	isw2-2	*	*	0.9409
		isw2-1	isw2-3		*	0.9409
		isw2-1	isw2-4			0.9216
		isw2-2	isw2-3	*	*	0.9801
		isw2-2	isw2-4	*		0.8836
		isw2-3	isw2-4			0.9025
	leo1∆	leo1-1	leo1-2	*	*	0.9604
		leo1-1	leo1-3		*	0.9604
		leo1-1	leo1-4			0.9604
		leo1-2	leo1-3	*	*	0.9604
		leo1-2	leo1-4	*		0.9409
		leo1-3	leo1-4			0.9801
	nap1∆	nap1-1	nap1-2	*		0.9604
		nap1-1	nap1-3		*	0.9604
		nap1-2	nap1-3	*	*	0.9409
	npl3∆	npl3-1	npl3-2			0.99
	paf1∆	paf1-1	paf1-2	*	*	0.9409
		paf1-1	paf1-3		*	0.9604
		paf1-1	paf1-4	*		0.9801
		paf1-2	paf1-3	*		0.8836
		paf1-2	paf1-4		*	0.9216
		paf1-3	paf1-4	*	*	0.9409
	rad6∆	rad6-1	rad6-2	*	*	0.95
	rpb4∆	rpb4-1	rpb4-2	*	*	0.82
	Deletion Strain	Replicate #1	Replicate #2	Separate People?	Different Date?	Pearson Correlation
	rph1∆	rph1-1	rph1-2		*	0.9409
		rph1-1	rph1-3	*	*	0.9604
		rph1-2	rph1-3	*	*	0.9409
	rsc30∆	rsc30-1	rsc30-2	*		0.9801
	rtf1∆	rtf1-1	rtf1-2	*	*	0.9409
		rtf1-1	rtf1-3			0.9216
		rtf1-1	rtf1-4	*	*	0.9604
		rtf1-2	rtf1-3	*	*	0.8836
		rtf1-2	rtf1-4			0.9409
		rtf1-3	rtf1-4	*	*	0.9409
	rtt103∆	rtt103-1	rtt103-2	*	*	0.9604
	set2∆	set2-1	set2-2	*	*	0.9801
		set2-1	set2-3	*	*	0.9025
		set2-1	set2-4			0.9604
		set2-2	set2-3	*	*	0.9025
		set2-2	set2-4			0.9604
		set2-3	set2-4			0.9604
	set3∆	set3-1	set3-2		*	0.9604
		set3-1	set3-3	*		0.9409
		set3-2	set3-3		*	0.9801
	spt4∆	spt4-1	spt4-2	*	*	0.93
	swr1∆	swr1-1	swr1-2	*	*	0.94
	ubp8∆	ubp8-1	ubp8-2	*	*	0.89
	vps15∆	vps15-1	vps15-2	*		0.9604
	vps34∆	vps34-1	vps34-2		*	0.9409
	wildtype	wt-1	wt-2	*	*	0.97
		wt-1	wt-3	*	*	0.99
		wt-1	wt-4	*	*	0.99
		wt-2	wt-3	*	*	0.98
		wt-2	wt-4	*	*	0.97
		wt-3	wt-4		*	0.99
