# Supplementary material for: Transcription elongation is finely tuned by dozens of regulatory factors
Source: eLife. 2022 May 16;11:e78944. doi: 10.7554/eLife.78944 (PMC9154744; doi:10.7554/eLife.78944)
Supplement: Supplementary file 2. — Lists every gene differentially transcribed, both sense and antisense strands, as determined using DESeq2 (Love et al., 2014), for every deletion strain included in screen. Significance was determined to be those genes with an adjusted -value ≤ 0.05 and an absolute log2(fold change) in expression compared to wild-type ≥1. For each significantly differentially transcribed gene, the log2(fold change) and adjusted p-value is reported. [file elife-78944-supp2.xlsx]

## Sheet: Table legend
Supplemental File 2 | Differential transcription of each gene across all deletion strains.
Lists every gene differentially transcribed, both sense and antisense strands, as determined using DESeq2 (Love, Huber and Anders, 2014), for every deletion strain included in screen. Significance was determined to be those genes with an adjusted p-value ≤ 0.05 and an absolute log2(fold change) in expression compared to wild-type ≥ 1. For each significantly differentially transcribed gene, the lo…

## Sheet: Sheet1
Table S2. Differential transcription of each gene across all deletion strains.
bre1∆			bur2∆			bye1∆			cac1∆			cac2∆			cac3∆			cbc1∆			ccr4∆			cdc39∆			cdc73∆			chd1∆			ctr9∆			dhh1∆			dst1∆			eaf1∆			elf1∆			gcn5∆
Gene	log2(Fold Change)	Adjusted p-Value	Gene	log2(Fold Change)	Adjusted p-Value	Gene	log2(Fold Change)	Adjusted p-Value	Gene	log2(Fold Change)	Adjusted p-Value	Gene	log2(Fold Change)	Adjusted p-Value	Gene	log2(Fold Change)	Adjusted p-Value	Gene	log2(Fold Change)	Adjusted p-Value	Gene	log2(Fold Change)	Adjusted p-Value	Gene	log2(Fold Change)	Adjusted p-Value	Gene	log2(Fold Change)	Adjusted p-Value	Gene	log2(Fold Change)	Adjusted p-Value	Gene	log2(Fold Change)	Adjusted p-Value	Gene	log2(Fold Change)	Adjusted p-Value	Gene	log2(Fold Change)	Adjusted p-Value	Gene	log2(Fold Change)	Adjusted p-Value	Gene	log2(Fold Change)	Adjusted p-Value	Gene	log2(Fold Change)
YDL074C	3.09066	4.98211e-37	YBR144C	2.36003	4.09417e-11	YJL153C	-2.75009	1.7136e-12	YCL025C	2.30694	1.33297e-25	YKR093W	2.04252	4.74858e-28	YCL025C	2.54945	3.85111e-26	YGR254W	2.16833	2.16618e-23	YNL279W	-5.72143	8.5331e-114	YBR295W	9.07363	1.64293e-80	YKL096W	5.97526	4.70018e-96	YCL025C	1.73104	9.74486e-29	YNR075W	4.17401	6.1711e-74	YLR452C	3.36496	8.19966e-29	YPR035W	1.70254	1.26571e-25	YNR075W	5.8554	3.08427e-67	YJR008W	2.43522	4.38894e-31	YIL015W	3.39463
YOL014W	1.48851	4.04642e-29	YJR044C	1.23496	5.69674e-09	YKL005C	2.30814	2.64952e-12	YPR138C	1.66295	1.33297e-25	YOR049C	4.23145	3.59772e-22	YKR093W	2.06797	3.41938e-20	YMR125W	2.13329	5.29679e-22	YJL170C	-4.85096	4.76475e-98	YCL025C	3.51162	7.9051e-73	YGL159W	3.27948	2.95818e-76	YER164W	7.80128	3.52309e-18	YOL014W	2.75022	3.29744e-45	YIL015W	2.61723	2.39317e-27	YBR085W	1.69414	3.23805e-15	YOL014W	4.31834	2.72634e-58	YPR194C	4.65368	4.47573e-26	YJL157C	3.50191
YER174C	1.5293	1.55525e-22	YLR055C	-1.12357	5.69674e-09	YDR314C	-1.29037	2.73563e-11	YOR049C	3.60218	1.65912e-22	YCL025C	2.53357	1.76286e-21	YOR049C	3.20192	3.21032e-17	YPR194C	4.34692	1.30501e-16	YHR177W	-5.07918	2.16774e-94	YBR293W	10.7841	2.4069e-55	YNR075W	6.68968	5.42354e-69	YBR182C	1.52391	1.31194e-17	YEL004W	2.57906	1.40377e-43	YNR044W	2.37063	4.89058e-25	YJR148W	1.28442	7.41983e-14	YOL101C	2.98597	1.14991e-37	YBL106C	1.77311	9.05852e-14	YBR092C	3.93994
YNR075W	2.1733	9.73043e-22	YMR230W-A	1.61123	5.69674e-09	YFR054C	2.9393	2.12939e-10	YKR093W	1.86563	6.09621e-21	YJR148W	1.6056	1.15411e-16	YPR194C	5.43745	6.99336e-16	YIL013C	1.86153	5.23318e-16	YMR232W	-6.56065	3.14291e-93	YBR298C	7.18006	2.16443e-36	YIL120W	4.27265	3.73194e-60	YIL162W	1.14218	6.78409e-12	YGL159W	2.88286	4.09851e-41	YLR257W	1.61594	6.86468e-21	YPR194C	2.51818	3.46347e-13	YDL193W	1.88486	2.31488e-33	YOR049C	1.35926	8.30888e-13	YDL227C	4.26285
YIL120W	2.38883	1.09571e-21	YOR091W	-1.35253	4.01749e-08	YDR525W-A	1.24244	1.24062e-09	YLL028W	1.58882	2.40961e-17	YGR281W	2.16101	2.65479e-12	YPR138C	1.422	3.21704e-13	YOR128C	1.10099	2.38575e-15	YIL037C	-7.6812	2.31941e-92	YPR194C	4.87575	2.07746e-33	YEL004W	3.0651	4.16716e-38	YDR541C	1.6622	1.19719e-11	YDR222W	2.48022	8.78632e-39	YGR039W	2.76357	3.81257e-18	YOR273C	1.64947	1.27292e-12	YMR319C	2.43054	9.11237e-33	YDL215C	1.49648	4.45409e-10	YPR194C	5.22272
YEL004W	2.07257	1.37063e-21	YJR005C-A	-9.05619	6.70448e-08	YLR402W	1.42421	1.55616e-09	YOR153W	2.30862	1.64173e-14	YOR153W	2.71747	6.09243e-12	YOR152C	2.24577	1.87869e-10	YHL028W	3.02289	3.4504e-11	YNR044W	-3.67714	2.49433e-87	YKR039W	2.81334	2.66015e-27	YHL028W	3.70434	7.17909e-37	YCR101C	1.46349	2.47769e-11	YIL120W	3.1785	1.40266e-36	YKL216W	1.77915	3.06204e-15	YNL065W	-1.37149	1.15154e-10	YNL155W	2.10326	1.80701e-31	YLR108C	1.4546	9.01458e-09	YNL160W	3.5259
YNR044W	1.91084	4.13876e-21	YIL014C-A	1.97846	7.89786e-08	YOR091W	-1.25807	1.76806e-09	YCR027C	1.75744	4.37481e-14	YLR257W	1.20525	9.36026e-11	YLR257W	1.44449	2.75003e-10	YOR107W	1.83792	1.67117e-10	YBR040W	-7.46701	8.34908e-74	YBR007C	1.97887	5.87814e-21	YJR025C	3.15296	1.65298e-31	YBL013W	1.19263	3.76644e-10	YJR094C	2.52138	2.70156e-36	YJL024C	2.0049	1.20066e-14	YNR075W	1.90954	2.31517e-10	YOR180C	1.98971	2.8092e-26	YLR257W	1.07706	2.53397e-08	YMR147W	2.84258
YOR381W	2.1187	5.65972e-21	YAL013W	-1.7769	2.08661e-07	YCR061W	1.23726	3.6671e-09	YLR459W	1.52854	7.30523e-12	YPR138C	1.93872	6.99871e-09	YLR256W-A	2.24363	4.14961e-10	YGL196W	1.14152	7.168e-09	YAL021C	3.01067	8.64877e-53	YPR138C	1.26156	2.80559e-19	YOL014W	2.52358	4.82368e-27	YKR091W	1.19475	1.51969e-09	YKL096W	6.78891	2.8211e-36	YOL126C	1.782	5.15736e-13	YPL118W	-1.06665	2.31517e-10	YOL093W	2.09104	1.86165e-25	YMR141C	2.93663	3.2134e-08	YNL040W	1.69258
YNL040W	1.36328	4.84117e-20	YCR085W	1.74783	3.49361e-07	YGR039W	1.29888	3.72493e-09	YGR082W	1.70569	1.0099e-11	YGR035C	1.80965	9.35863e-09	YLL028W	1.51041	2.53844e-08	YDL037C	1.46504	1.53784e-07	YOR343C	-3.99421	8.46956e-46	YIR032C	2.95463	3.10224e-18	YDR541C	3.25976	4.74795e-26	YHR214W	3.512	2.40696e-09	YOL002C	2.37467	1.78284e-33	YJL157C	1.6871	5.88349e-13	YGL156W	-1.71715	4.21656e-10	YNR074C	3.2138	1.08492e-24	YCR095W-A	1.52523	1.35541e-07	YIL040W	1.87793
YIL119C	1.49409	9.30097e-17	YGL212W	-1.05801	2.12536e-06	YDL072C	1.04198	3.72493e-09	YCR002C	1.65656	1.63985e-11	YLR402W	1.97456	9.36986e-09	YLR099C	1.24505	3.66778e-08	YBR244W	1.01729	7.14342e-07	YDR085C	-3.53073	1.19051e-42	YIL029C	1.49631	4.12669e-18	YIL162W	1.64605	6.72084e-26	YJL212C	1.00136	7.45555e-09	YJL213W	1.84593	8.12251e-33	YGL032C	1.78309	2.64728e-12	YIL120W	1.13203	2.42175e-09	YGR021W	2.02649	1.05392e-23	YBR066C	1.10695	2.8294e-07	YLR452C	1.95952
YHL048W	2.53548	9.76085e-17	YMR102C	-1.33816	2.12536e-06	YFL050C	-1.28976	2.17045e-08	YPR035W	1.00456	4.0325e-11	YJR056C	1.79874	1.29777e-08	YOR153W	1.85961	4.53631e-07	YDL218W	1.23365	1.19127e-06	YGR032W	-2.48912	1.91021e-40	YMR065W	1.43903	1.42758e-17	YER011W	2.55996	2.22406e-25	YEL004W	1.28176	1.2266e-08	YER001W	1.74182	1.26643e-31	YGR040W	1.54496	4.46585e-12	YLR466C-B	-3.11829	6.92952e-08	YBL107C	1.8668	7.55306e-22	YGL067W	1.34254	3.64792e-07	YEL004W	3.86174
YKL096W	1.92085	3.65721e-16	YGR169C-A	-1.64416	2.26106e-06	YGL029W	-1.93183	3.23297e-08	YDL128W	1.24342	4.10038e-10	YLR459W	1.26783	2.10589e-08	YGR281W	1.61078	1.60841e-06	YCR085W	1.35339	1.36411e-06	YOR049C	2.6791	1.2347e-34	YBR001C	2.03929	2.79045e-17	YER044C-A	3.77741	3.46434e-25	YOR347C	1.36825	1.69986e-08	YHR180W	2.96011	5.90487e-29	YCR018C	1.54502	1.19573e-11	YCR082W	-1.29679	5.28231e-07	YJL184W	1.93252	7.5711e-22	YMR230W-A	2.22402	4.02885e-07	YKL051W	2.22968
YPR196W	1.28381	7.82628e-15	YNL079C	-1.32048	6.26077e-06	YOL117W	-1.65958	3.34359e-08	YMR071C	1.34271	6.10726e-10	YCR002C	1.52944	4.80989e-08	YCR061W	1.36273	5.27839e-06	YBR157C	1.42367	1.45685e-06	YBL043W	-3.24822	1.07957e-31	YDL127W	1.25801	3.32639e-17	YGL204C	2.9872	8.16705e-25	YGL229C	1.03517	2.15532e-08	YCL047C	1.78586	1.73026e-26	YNR075W	2.32255	4.46272e-10	YIL101C	-2.01547	1.72419e-06	YDL227C	2.6366	4.69251e-21	YLR152C	1.18508	5.61568e-07	YLR194C	1.76195
YOR092W	1.53456	1.74919e-14	YLR194C	-1.02168	6.26077e-06	YJR154W	-1.48803	3.38023e-08	YPL189C-A	1.42288	8.59722e-10	YIL090W	1.44444	1.09903e-07	YJR148W	1.12107	8.10248e-06	YMR136W	1.78285	2.41767e-06	YGL032C	-2.30044	2.86711e-28	YLL002W	1.47022	8.26628e-17	YLL063C	2.55948	1.29902e-24	YBR208C	1.28389	3.41406e-08	YBR066C	1.94428	2.70513e-26	YCR101C	2.68333	5.2593e-10	YOR049C	1.66503	1.93612e-06	YCR101C	3.40586	1.72115e-20	YKR058W	2.17399	6.42079e-07	YOL014W	2.04676
YCR095W-A	2.04984	5.00481e-14	YPR194C	2.92273	1.75371e-05	YDL197C	-1.24914	4.64542e-08	YPR119W	1.25752	1.40447e-09	YPL127C	1.45244	1.10714e-07	YLR152C	1.62193	1.5213e-05	YIL132C	1.45849	3.90928e-06	YCL055W	-2.46563	1.15252e-26	YMR006C	1.58787	6.70919e-16	YNR074C	2.71779	2.19037e-24	YCR095W-A	1.60094	8.25019e-08	YBR161W	1.65997	3.88561e-25	YOL014W	1.78883	6.06727e-10	YCL021W-A	-1.76355	2.57868e-06	YDR311W	1.42562	5.33967e-20	YOR152C	1.33057	3.62605e-06	YDL008W	1.54585
YMR065W	1.14856	7.98838e-14	YBR292C	1.93701	1.84723e-05	YCR085W	2.23244	5.23408e-08	YGR035C	1.68634	2.39745e-09	YJR044C	1.6099	1.10714e-07	YGL234W	1.00868	2.00193e-05	YLR257W	1.26519	7.47846e-06	YKL218C	-2.6294	1.97848e-26	YBR006W	2.94709	2.49616e-15	YCL047C	1.84577	2.19037e-24	YIL013C	1.54373	8.25019e-08	YER174C	1.69416	3.94523e-25	YGR142W	1.93297	1.43124e-09	YNL160W	-1.6541	5.72571e-06	YHR062C	1.43538	5.69324e-20	YHR086W-A	3.86497	4.69743e-06	YOL104C	2.01847
YPR114W	1.01882	4.14644e-13	YMR263W	-1.12601	1.97414e-05	YDR423C	-1.06792	5.55777e-08	YLL001W	1.35407	4.0224e-09	YLR099C	1.1266	1.4428e-07	YPL092W	1.29844	2.63216e-05	YMR210W	1.00204	7.76547e-06	YGR110W	-3.58048	6.60793e-23	YBR008C	2.27501	6.91106e-15	YAR023C	2.25496	3.42145e-24	YJL214W	2.33842	1.14234e-07	YER044C-A	3.53091	4.62082e-25	YOR304C-A	1.99782	1.71088e-09	YJR109C	1.16481	7.97516e-06	YLR449W	1.40799	3.78282e-19	YKR046C	1.42422	6.04161e-06	YEL005C	2.54105
YLR452C	1.16499	4.68796e-13	YHR001W-A	1.52964	2.01295e-05	YKL172W	-1.25535	6.88315e-08	YDL188C	1.63613	5.43543e-09	YBR197C	1.69508	2.05994e-07	YDR072C	1.10951	2.9022e-05	YIL119C	2.30089	9.42587e-06	YDR380W	-4.02503	7.5257e-22	YDR323C	1.35067	7.05287e-15	YGR295C	2.08204	4.1416e-24	YEL011W	1.2368	3.9344e-07	YOL013W-B	4.01832	7.03668e-25	YBL107C	2.05969	2.18536e-09	YLR341W	-3.86763	1.16511e-05	YOR252W	1.72146	8.04549e-19	YOR390W	1.1393	1.81943e-05	YLL018C-A	1.2468
YGL159W	1.21166	7.39509e-13	YBR244W	1.23039	3.77345e-05	YMR128W	-1.23308	6.88315e-08	YPR020W	1.91015	5.72459e-09	YKL003C	1.39297	6.95046e-07	YGR295C	1.49243	3.63643e-05	YPR035W	1.10514	1.78353e-05	YPR035W	1.61097	5.29389e-21	YMR163C	1.07129	1.06457e-13	YAR033W	2.44696	1.01504e-23	YIL120W	1.18051	3.97274e-07	YGR295C	1.82254	3.04701e-24	YIL040W	1.4597	3.02008e-09	YOR230W	1.02686	1.16722e-05	YNL182C	1.75299	9.10788e-19	YOL091W	2.7696	3.30394e-05	YOR238W	2.22117
YJL213W	1.43461	1.44166e-12	YKL172W	-1.4202	5.47157e-05	YGL244W	-1.01796	1.03613e-07	YOR067C	1.42999	7.72246e-09	YLR404W	1.71635	1.00271e-06	YBR196C-A	2.22653	6.42401e-05	YDL043C	1.05664	0.000100925	YJL196C	2.11809	1.71555e-20	YKL187C	2.64556	1.08618e-13	YIL014C-A	3.55588	8.2942e-23	YJL213W	1.40932	1.08389e-06	YHR123W	1.35671	6.4712e-23	YPL001W	1.77089	4.26199e-09	YDR281C	2.84188	2.35794e-05	YDR260C	1.49185	4.78394e-18	YOR008C-A	2.81418	5.09423e-05	YNR044W	1.96518
YJR094C	1.63862	6.35904e-12	YGL204C	1.78719	5.58691e-05	YIL040W	1.10083	1.30082e-07	YLR257W	1.12238	8.53826e-09	YMR063W	1.64686	1.09089e-06	YDL215C	1.1492	0.000223446	YDL227C	1.81034	0.00022045	YOL058W	-2.05828	2.356e-20	YOL058W	2.50966	1.21072e-13	YGL032C	2.01764	2.20816e-22	YGR161W-C	1.3009	1.34539e-06	YER057C	1.6687	1.41526e-22	YIL027C	1.24165	9.52385e-09	YDL039C	1.64746	2.46059e-05	YOR287C	1.87319	5.43784e-18	YPL274W	1.12083	5.54403e-05	YLR244C	1.00594
YBL107C	1.18639	2.25662e-11	YMR128W	-1.38589	5.58691e-05	YIL054W	2.65751	1.45426e-07	YOL158C	1.48075	1.08227e-08	YEL004W	1.96801	1.13763e-06	YOR383C	2.16774	0.000334794	YMR117C	1.35569	0.000245191	YNL192W	-1.48035	9.77345e-19	YIL003W	1.22967	1.35382e-13	YPR139C	1.54054	2.33589e-22	YKL219W	1.20475	1.3875e-06	YMR136W	3.47895	1.58872e-22	YPR082C	1.53335	1.45198e-08	YKL008C	1.11373	2.83689e-05	YEL004W	1.53581	5.6813e-18	YOL058W	1.0227	6.19416e-05	YLR059C	1.69535
YOR273C	1.53528	2.52061e-11	YCR083W	1.01406	6.48797e-05	YER164W	-1.27387	1.81207e-07	YDR404C	1.24907	1.46373e-08	YPL195W	1.15969	1.13763e-06	YLR402W	1.14896	0.000555899	YGR109C	1.18822	0.000252059	YJL213W	1.75209	9.77345e-19	YPR068C	1.54431	3.41855e-13	YMR274C	1.78623	4.54358e-22	YNR075W	1.15959	1.8902e-06	YJR025C	3.03588	1.81981e-22	YKL144C	1.38393	2.22421e-08	YER065C	1.01673	2.83689e-05	YLR257W	1.6712	1.40583e-17	YJL170C	1.52876	9.38969e-05	YKL096W	2.93
YNR074C	1.17052	6.08189e-11	YOR384W	-4.34867	0.000125439	YLL060C	-1.60706	3.56781e-07	YFL009W	1.15443	4.77907e-08	YOR257W	2.51961	1.27125e-06	YMR063W	1.22256	0.000672006	YER130C	1.08244	0.000489919	YDL218W	2.82197	1.06583e-18	YBR297W	11.2696	4.02415e-13	YMR023C	2.33508	1.66853e-21	YGR088W	1.25337	4.99262e-06	YOR092W	1.57706	2.10454e-22	YDL020C	1.24739	4.61985e-08	YBR145W	1.55891	3.08234e-05	YOR377W	1.66394	1.56197e-17	YBL039W-B	1.11855	0.00011219	YGR039W	1.52207
YLR404W	1.21144	7.00294e-11	YGR129W	-2.30702	0.000163637	YJR008W	-1.14479	4.56314e-07	YGR198W	1.11203	5.03169e-08	YKL013C	1.20466	1.30664e-06	YDR404C	1.03715	0.000673212	YLR364W	1.01271	0.000746057	YBR072W	-4.24041	4.33762e-17	YOR071C	1.5404	9.88605e-13	YOL002C	2.33517	4.1439e-21	YBR284W	1.22875	7.18031e-06	YOR179C	1.6913	2.22718e-22	YGL115W	1.34562	4.98303e-08	YFR041C	-1.04194	3.73934e-05	YBR030W	1.8488	2.40212e-17	YLL062C	1.66405	0.00011629	YGR142W	2.47955
YLL016W	1.35835	7.37673e-11	YOL159C	1.30841	0.00021895	YJL062W-A	1.26411	7.53783e-07	YKL141W	1.69252	7.43593e-08	YNL222W	1.13622	1.88153e-06	YOR065W	1.3951	0.000692797	YKL216W	1.00827	0.000938158	YKL217W	-3.16458	4.95166e-17	YHR214W	3.21762	3.14475e-12	YOL159C	2.40848	6.2193e-21	YAL063C	3.0412	8.53302e-06	YER091C	2.45919	2.57892e-22	YDR373W	1.32551	6.3479e-08	YOR032C	-2.67133	3.78562e-05	YOR238W	1.89577	2.87404e-17	YIL120W	1.15874	0.00011629	YGR109C	2.30321
YMR274C	1.19664	9.33516e-11	YOR268C	2.30956	0.000232992	YLL023C	1.25587	8.75341e-07	YOR180C	2.05614	1.09129e-07	YDL052C	1.42475	2.33238e-06	YOR273C	1.10962	0.000728779	YDR535C	2.14131	0.00102618	YEL073C	-2.88323	8.54573e-15	YAL037W	3.08741	4.68483e-12	YOR071C	2.49247	6.64099e-21	YLL063C	1.27415	1.09666e-05	YPR068C	1.80941	3.66849e-22	YJR051W	1.1388	7.23557e-08	YIR027C	-1.93884	4.06406e-05	YKL065C	1.62198	7.84178e-17	YDR274C	4.56145	0.00013163	YOL011W	1.09835
YKL219W	1.12306	4.21525e-10	YOR161C-C	2.90464	0.000232992	YLR341W	-3.59424	1.03783e-06	YOR252W	1.96647	1.7924e-07	YDR047W	1.01596	3.36197e-06	YCR085W	1.47737	0.000790896	YBL029W	1.90318	0.00149367	YBR085W	2.24224	1.3015e-14	YGL208W	1.6239	8.2368e-12	YLR124W	2.29002	1.32027e-20	YJR094C	1.6141	1.94286e-05	YGL032C	1.8901	3.66849e-22	YHR084W	1.07531	7.57137e-08	YJL213W	1.54697	4.36014e-05	YDR541C	2.35584	8.78571e-17	YOR180C	1.00973	0.000133354	YFR047C	1.87948
YPR068C	1.11273	5.24216e-10	YIR003W	-1.47785	0.000240017	YNL224C	-1.05109	1.0413e-06	YFL041W	1.21364	2.33246e-07	YOR132W	1.48004	4.34341e-06	YIL054W	3.23618	0.000830266	YBL106C	1.44437	0.00186347	YJR148W	1.22753	2.5597e-14	YGL229C	1.55675	1.21619e-11	YJL213W	2.48812	1.47055e-19	YGR243W	1.63003	2.09063e-05	YJL157C	1.84965	6.4132e-22	YMR270C	1.25762	9.52025e-08	YFL014W	-3.77291	5.10885e-05	YOL125W	1.30105	2.80315e-16	YCR024C	1.67016	0.000183405	YNL046W	1.33681
YGR295C	1.17865	1.49817e-09	YOR383C	-3.08441	0.000281953	YOR049C	1.11195	1.05616e-06	YDR384C	1.37942	2.86663e-07	YOL140W	1.18912	4.85501e-06	YGR038W	1.15169	0.000871496	YDR024W	1.00344	0.00218167	YLL028W	2.09301	3.41096e-14	YDL218W	2.44628	1.36348e-11	YMR136W	2.40714	2.86298e-19	YJL133C-A	1.53571	0.000127439	YPR071W	1.92198	5.46861e-21	YLR038C	1.42415	9.92964e-08	YOR384W	-2.2179	6.72359e-05	YOR091W	1.9087	6.86424e-16	YHR022C-A	1.43669	0.000304035	YGL032C	1.59664
YPR199C	1.1739	2.20143e-09	YEL060C	-2.36286	0.000287099	YFL055W	1.12515	1.19685e-06	YLR402W	2.06887	3.08454e-07	YPL067C	1.45199	8.25553e-06	YER154W	1.23056	0.00103821	YGL182C	1.17481	0.00252471	YFR015C	-3.29831	4.40631e-14	YBR292C	9.90111	1.7982e-11	YBR144C	2.63047	6.36506e-19	YLR152C	1.00051	0.00013911	YGL194C-A	1.88558	2.12589e-20	YGL060W	1.32403	1.10109e-07	YKL161C	-1.13093	8.41997e-05	YHR214W	3.81308	5.08717e-15	YKR103W	1.21751	0.000430325	YLR118C	1.4156
YDR539W	1.12082	2.24582e-09	YHR180W	1.61482	0.000340517	YER084W	3.0646	1.51854e-06	YIL090W	1.29698	3.61308e-07	YER154W	1.32735	9.18526e-06	YEL011W	1.72218	0.00110029	YER011W	2.4789	0.0026443	YJR109C	-1.54074	1.04969e-13	YBL013W	2.14063	1.88557e-11	YOR003W	2.05948	7.71648e-19	YEL072W	1.02766	0.000163871	YMR065W	1.6671	2.26511e-20	YFL001W	1.18173	1.19256e-07	YOR153W	1.36906	8.41997e-05	YGL182C	2.68554	6.34087e-15	YBR292C	2.67233	0.000430325	YLL016W	1.43814
YLR257W	1.02283	3.01267e-09	YPL055C	-1.34061	0.000400423	YGR169C-A	-1.23576	1.80871e-06	YOL142W	1.01714	4.25537e-07	YGR121W-A	2.68289	9.35465e-06	YJR094C	2.27209	0.00115051	YGL263W	2.04139	0.00435366	YOR347C	-2.14995	1.17773e-13	YCR006C	1.41361	2.21856e-11	YHR140W	3.13795	1.04101e-18	YKR106W	2.81658	0.000259634	YOR280C	2.19038	3.87955e-20	YCL055W	1.57075	1.19256e-07	YKR093W	1.29794	8.41997e-05	YDR130C	1.75257	8.41433e-15	YNR001W-A	2.79784	0.000459054	YKR049C	2.17264
YGL251C	1.49099	8.04319e-09	YIL054W	2.21877	0.000438695	YGL007C-A	1.86234	1.91213e-06	YNL070W	1.26847	4.93195e-07	YDR264C	1.23364	1.20399e-05	YCR006C	1.1042	0.00132757	YDR281C	2.14066	0.00537212	YFL052W	-3.82448	3.73345e-13	YLR142W	2.08435	3.48191e-11	YOL101C	2.02218	1.39003e-18	YCR098C	1.703	0.000314051	YHR063C	1.48527	4.06933e-20	YDR249C	1.36166	1.69901e-07	YMR311C	-1.34179	8.41997e-05	YOR128C	1.18351	8.66223e-15	YEL023C	1.33931	0.000482581	YPL163C	1.97632
YOR385W	1.0044	1.30465e-08	YDR305C	1.56111	0.000631147	YCL049C	1.26556	2.69664e-06	YPL195W	1.08686	7.07305e-07	YJL079C	1.03977	1.3595e-05	YGR035C	1.19244	0.00162376	YOR316C-A	1.25748	0.0066746	YLR452C	-1.26791	1.42865e-12	YBL042C	1.32115	3.72243e-11	YKL219W	2.34596	3.39764e-18	YLL055W	1.02793	0.000314553	YDR225W	1.56198	4.48505e-20	YDR267C	1.37437	1.70015e-07	YLR152C	1.11757	8.77334e-05	YLR397C	1.16469	1.24995e-14	YGR067C	1.92458	0.000589273	YJL127C-B	1.09463
YKL189W	1.32585	2.14459e-08	YFR054C	1.89165	0.00063609	YAL037W	-2.20227	2.84182e-06	YKL165C	1.09843	8.27872e-07	YDR072C	1.01691	1.39798e-05	YPR035W	1.08043	0.00166795	YJR153W	2.05142	0.0066746	YJL157C	-1.25477	1.67262e-12	YDR059C	2.08903	7.79775e-11	YPR071W	2.10953	4.15049e-18	YHR214C-E	2.0328	0.000767244	YGL055W	1.46057	5.28705e-20	YDR138W	1.31344	2.34276e-07	YJL153C	-2.34415	9.27407e-05	YGR039W	2.13726	1.34852e-14	YGR263C	1.09794	0.000680813	YCR018C	1.43406
YPR139C	1.12694	3.70628e-08	YPR094W	1.03744	0.000659172	YCL005W	1.18732	3.13022e-06	YBL084C	1.33075	1.25532e-06	YGR141W	1.39064	1.52518e-05	YDL206W	1.45976	0.00228545	YDL039C	1.1403	0.00914218	YKR076W	-2.70568	1.68933e-12	YOL003C	1.24932	1.02844e-10	YOR273C	2.41102	6.1615e-18	YGR161C	1.3971	0.00100489	YGL204C	2.84965	1.16865e-19	YEL048C	2.64405	2.45963e-07	YCR010C	-3.57287	0.00011831	YDR312W	1.35259	2.10505e-14	YDL206W	1.26846	0.000774049	YER138W-A	2.90279
YHL028W	1.37958	6.40202e-08	YBR105C	-1.63301	0.00070972	YAL061W	1.40335	3.54577e-06	YMR058W	1.59269	1.53781e-06	YPL116W	1.21692	1.84286e-05	YOR306C	1.35696	0.00237104	YPL177C	1.00133	0.00945763	YDR107C	1.27641	1.89135e-12	YJR122W	1.14495	3.00695e-10	YOR280C	2.81871	8.55087e-18	YDL223C	1.12803	0.001099	YOL159C-A	1.99587	1.39673e-19	YDR228C	1.40717	2.89087e-07	YEL041W	-1.30557	0.000125107	YOR181W	1.47054	3.40209e-14	YJR149W	1.80503	0.00100298	YER001W	1.65584
YBR292C	2.13827	8.39359e-08	YDL206W	1.36711	0.00070972	YKL004W	1.12891	6.00833e-06	YJL006C	1.24346	1.57769e-06	YPL111W	1.37967	2.07211e-05	YJR077C	1.03715	0.0024269	YOR268C	1.55657	0.0127291	YML054C	-2.10912	2.35206e-12	YDL215C	1.56712	6.03848e-10	YPR199C	1.79281	1.75893e-17	YER044C-A	1.04984	0.00113954	YOR176W	1.20246	2.11986e-19	YOR067C	1.08406	3.01322e-07	YHR143W	1.10776	0.000135672	YLR265C	2.03338	5.44178e-14	YDR523C	2.84043	0.00111925	YER060W	1.9606
YOR390W	1.56504	9.0406e-08	YDR274C	4.49962	0.00084876	YJL133C-A	1.8896	6.4029e-06	YHL040C	1.28515	1.64265e-06	YOL094C	1.07766	2.20616e-05	YPL111W	1.07974	0.00280924	YJR009C	1.30808	0.0164844	YGR250C	-2.05737	2.90001e-12	YHR159W	1.66679	1.31523e-09	YOL025W	1.91968	1.83813e-17	YNL279W	1.02742	0.00116575	YOR071C	1.94154	2.22963e-19	YPL274W	1.62678	3.26262e-07	YJL144W	-2.00518	0.00014738	YER011W	2.18134	7.05665e-14	YLR343W	3.10721	0.00132058	YPR138C	1.23942
YAR023C	1.19515	1.41357e-07	YDL181W	1.30513	0.00106004	YAR070C	4.63246	7.82139e-06	YGR295C	1.42309	1.65538e-06	YNL152W	1.31165	2.50859e-05	YDL227C	1.07817	0.00291177	YCR006C	1.31301	0.0264922	YLL049W	1.72024	3.90268e-12	YGL175C	1.1494	2.66657e-09	YDR533C	1.96548	2.2247e-17	YAR070C	3.47046	0.00124114	YOL101C	2.79221	4.326e-19	YOR262W	1.32746	3.26816e-07	YOR216C	-1.10791	0.000429024	YBR029C	1.70213	8.75454e-14	YMR094W	1.02219	0.00146366	YPR158W	1.65088
YLR126C	1.2986	1.98839e-07	YBR295W	-1.25557	0.00106004	YLR125W	-2.31489	9.19793e-06	YPL162C	1.1293	1.71574e-06	YOR180C	1.48833	2.56371e-05	YPL103C	1.18849	0.00299824	YML054C	1.12225	0.040234	YER044C	1.84006	7.0005e-12	YOR025W	1.44198	2.99211e-09	YBR210W	2.09725	2.24405e-17	YOR268C	1.82314	0.00173783	YGL143C	1.80217	4.53882e-19	YFL047W	1.35536	3.52744e-07	YBR128C	-1.42869	0.000441168	YGR048W	1.23545	1.14963e-13	YML066C	3.69698	0.00147464	YLR446W	1.36814
YNL261W	1.08123	2.23863e-07	YBR198C	-1.07386	0.00106004	YML109W	-1.07155	9.78248e-06	YGR281W	1.32109	1.84551e-06	YDR350C	1.04505	2.9935e-05	YBL013W	1.1009	0.00348435	YPR138C	1.24904	0.043125	YHR015W	-3.15363	1.06524e-11	YGL204C	2.20098	4.63977e-09	YER057C	1.52313	1.1576e-16	YKR039W	1.29079	0.00186369	YFR047C	2.11419	5.63324e-19	YPL188W	1.16535	3.61365e-07	YJR095W	-4.00006	0.000445547	YNR054C	1.39405	1.31408e-13	YER179W	2.96831	0.00151463	YMR199W	1.31292
YBR157C	1.39893	2.23863e-07	YHR140W	1.88565	0.00106433	YOR268C	2.32867	9.84543e-06	YNL003C	1.12575	2.05232e-06	YOR152C	1.73582	2.9935e-05	YIL074C	1.06413	0.00388323	YNL239W	-1.81224	3.59009e-29	YDL021W	-2.63861	1.25985e-11	YPR155C	1.14708	7.65761e-09	YBR292C	2.92301	2.56574e-16	YAR023C	1.07748	0.00236632	YNR061C	1.15665	8.74301e-19	YGR033C	1.39626	4.67779e-07	YDR216W	-2.10596	0.000463169	YOR018W	1.35764	1.71052e-13	YER185W	1.81537	0.0015266	YBR182C	1.80632
YBR182C	1.26732	3.0667e-07	YPR074W-A	-4.14796	0.00133318	YPL250C	1.19775	9.97327e-06	YMR257C	1.36616	2.06615e-06	YDR034C	1.0818	3.66692e-05	YGR033C	1.1101	0.0046914	YKL071W	-5.04984	1.38123e-27	YLL012W	1.73596	1.9102e-11	YIL028W	1.3934	1.03681e-08	YLR152C	2.04124	2.68917e-16	YLL061W	1.17266	0.00276537	YJR116W	1.76581	1.15409e-18	YOR297C	2.022	5.08904e-07	YCR014C	-2.63088	0.000466211	YCL059C	1.42439	1.96353e-13	YJL133C-A	1.3455	0.00242145	YMR182W-A	1.33202
YLR124W	1.0934	3.40394e-07	YDR405W	-1.13917	0.0017304	YPR182W	1.088	1.1578e-05	YGR041W	1.09165	2.42568e-06	YMR195W	1.5007	4.27906e-05	YCL008C	1.05418	0.00482508	YHL024W	-3.86391	5.24391e-23	YKL161C	-1.60056	1.93058e-11	YGR121C	1.69953	1.89868e-08	YFR047C	2.62585	2.72191e-16	YNR070W	1.04246	0.00331481	YLL002W	1.27025	1.33613e-18	YDR370C	1.24251	5.40994e-07	YDR218C	-3.70527	0.00048715	YPR071W	1.62489	2.18847e-13	YBL109W	4.14013	0.00259121	YDL179W	1.68068
YIL013C	1.34216	3.49305e-07	YGL194C-A	1.24086	0.00174368	YHR214C-E	2.75517	1.72839e-05	YBR246W	1.14954	2.67843e-06	YBL084C	1.21982	4.64606e-05	YBR182C-A	1.8624	0.00492408	YDR365C	-2.01961	3.24528e-20	YOR052C	-1.18139	2.31931e-11	YGR016W	1.06508	2.00924e-08	YDR222W	1.73949	7.48037e-16	YBR182C-A	1.19542	0.00344265	YDR132C	2.24018	4.25719e-18	YNL155W	1.28863	6.72642e-07	YGL263W	2.34047	0.000568417	YIL114C	1.70441	2.89493e-13	YGR243W	1.84428	0.00300531	YOR150W	1.00268
YOR003W	1.07455	4.75984e-07	YNL110C	-1.18258	0.00174368	YKL219W	1.02148	1.96049e-05	YIL034C	1.39017	2.75084e-06	YIL009W	1.18747	5.69779e-05	YOL003C	1.04387	0.0053927	YHR071W	-1.96498	3.38805e-18	YCR085W	2.01178	3.85594e-11	YPR195C	1.40844	3.56031e-08	YKR095W-A	1.89824	8.55232e-16	YCR085W	1.06802	0.00370871	YGR091W	1.50613	8.18733e-18	YGL047W	1.54679	9.31443e-07	YIL162W	1.20644	0.000573481	YMR233W	2.18699	5.21665e-13	YIL089W	1.40055	0.00412791	YLL054C	1.07096
YOR137C	1.07306	4.90768e-07	YKL095W	-2.11661	0.00174368	YEL004W	1.22362	2.11952e-05	YKL091C	1.87499	3.34743e-06	YBR125C	1.28054	6.34846e-05	YIL013C	1.19241	0.00593828	YJL133C-A	-5.98634	6.54547e-18	YDL241W	-2.28657	7.67642e-11	YKL168C	1.07913	3.98047e-08	YDR281C	3.39136	1.02882e-15	YOL058W	1.15011	0.00436554	YDL227C	1.82052	1.00194e-17	YOR305W	1.07564	1.34017e-06	YOL131W	-6.92636	0.000658819	YPL038W	1.37636	8.63229e-13	YOR227W	1.05982	0.00412791	YOL159C-A	1.77236
YJL214W	2.14036	8.40154e-07	YBR289W	-1.01645	0.00188241	YNL110C	-1.02985	2.8011e-05	YJR148W	1.18346	3.37659e-06	YOL062C	1.07266	7.50805e-05	YHR214W	2.38259	0.00700332	YKR076W	-2.44773	1.68031e-17	YMR206W	-3.95014	7.67642e-11	YGL237C	1.16741	4.50222e-08	YOL122C	1.61938	1.53281e-15	YDR102C	1.04212	0.00520484	YGL254W	1.59374	1.3876e-17	YDL209C	1.05804	1.40926e-06	YDR158W	1.09843	0.000668488	YJL051W	1.15373	9.85862e-13	YMR144W	1.16331	0.00434984	YBR071W	1.12418
YHL021C	1.22614	1.46908e-06	YJR153W	-3.29484	0.00188241	YGR143W	-1.03032	2.8011e-05	YDR046C	1.13685	3.58807e-06	YBR030W	1.15899	7.70582e-05	YNR046W	1.01171	0.00834536	YEL060C	-1.69382	4.46465e-17	YEL060C	-1.61694	9.07425e-11	YOR019W	1.25699	5.69652e-08	YBL029C-A	1.3802	2.51764e-15	YHR213W-B	3.58845	0.00658415	YKL219W	1.89724	1.50903e-17	YDR198C	1.40091	1.82142e-06	YDL198C	1.00391	0.000792572	YBR182C	1.55248	1.05311e-12	YER181C	1.89759	0.00469368	YHR214C-E	2.36574
YDL154W	1.13573	1.9725e-06	YNL065W	-1.1992	0.00188241	YMR102C	-1.06129	3.48808e-05	YLR088W	1.02034	4.32417e-06	YOL158C	1.25131	9.02156e-05	YGL003C	1.07568	0.00949697	YCR018C	-1.43277	2.11009e-15	YER033C	-2.17665	1.28496e-10	YMR198W	1.10966	5.81528e-08	YLL016W	2.07454	6.39412e-15	YER138W-A	1.04216	0.00953015	YGL196W	1.21152	2.2663e-17	YDL073W	1.00565	1.8269e-06	YHL024W	-1.4935	0.00110686	YLR002C	1.1741	1.35207e-12	YCR015C	1.3578	0.00548451	YIL132C	1.53361
YCR101C	1.22585	2.00953e-06	YHR214C-E	2.54474	0.00188241	YMR227C	-1.60069	4.14721e-05	YLR152C	1.67593	5.60867e-06	YOR018W	1.10243	9.57851e-05	YPR191W	1.22576	0.0100141	YJL052W	-5.10914	5.91992e-15	YMR006C	2.432	1.42642e-10	YNL072W	1.37659	6.01815e-08	YDL219W	1.83863	6.87824e-15	YBR297W	1.81153	0.0137476	YJL097W	1.23382	7.08315e-17	YBR087W	1.15656	1.88791e-06	YGL251C	2.23653	0.0012087	YOR071C	1.43948	1.65989e-12	YOL024W	2.80027	0.00622436	YIL049W	1.24858
YOR176W	1.05158	2.62e-06	YIL154C	-1.38894	0.0018874	YDR541C	1.55764	4.6562e-05	YNR059W	1.44767	5.64805e-06	YOR025W	1.05633	0.000109692	YEL004W	1.02681	0.0100141	YCR005C	-4.37706	9.71219e-15	YDR171W	-1.5636	2.43374e-10	YPL104W	1.01901	6.73879e-08	YPL076W	1.69299	7.97359e-15	YDL210W	1.15898	0.0150328	YCR006C	1.78499	7.86312e-17	YGR016W	1.52053	1.89042e-06	YOR152C	1.14774	0.00133167	YNL087W	1.18519	1.80896e-12	YIL107C	1.0528	0.00628231	YFL041W	1.02883
YJR116W	1.36019	2.70019e-06	YOR382W	-2.47334	0.00218364	YGR129W	-1.39083	6.71344e-05	YMR063W	1.39173	7.21712e-06	YNL217W	1.15677	0.000110755	YOR390W	1.43991	0.0107324	YPR184W	-1.87134	4.02201e-13	YJL201W	1.13229	2.8964e-10	YGL248W	1.09876	9.40123e-08	YER174C	1.42249	8.1257e-15	YEL041W	1.23224	0.0168288	YPR069C	1.29073	1.78332e-16	YKL209C	1.37902	2.34241e-06	YDR225W	1.02809	0.00137518	YDR281C	3.44454	2.23977e-12	YOR050C	2.01462	0.0065886	YDL127W	1.20487
YKL051W	1.05841	2.74844e-06	YDL139C	-1.7469	0.00252707	YPR133C	-1.21789	6.71344e-05	YDL215C	1.24478	8.68416e-06	YJR132W	1.01589	0.000125081	YNR059W	1.1217	0.0124111	YPL258C	-2.61747	7.27946e-13	YDR016C	1.39568	3.46088e-10	YDL230W	1.34359	1.05652e-07	YLR118C	1.65209	1.08972e-14	YDR170W-A	1.02786	0.0168777	YDL219W	1.60199	3.37606e-16	YPR122W	1.48171	2.40853e-06	YOR316C-A	1.8144	0.00142384	YNL035C	1.30594	2.59662e-12	YLR142W	1.02386	0.00834845	YOR066W	1.00932
YJL133C-A	1.80729	2.87299e-06	YHR088W	-1.34504	0.00289634	YBR196C-A	1.7567	8.00041e-05	YPL271W	1.17785	9.01108e-06	YCR061W	1.0973	0.000145237	YLR404W	1.04738	0.0144995	YIL066C	-3.36975	8.45723e-13	YGR142W	-1.23582	4.85929e-10	YNL279W	2.59691	1.19073e-07	YOL159C-A	2.95876	2.12625e-14	YNL334C	2.03384	0.0195478	YNL193W	1.41628	3.73023e-16	YJL006C	1.10519	2.89662e-06	YOR107W	-1.26269	0.00148749	YOR044W	1.43724	2.73373e-12	YOR387C	3.79419	0.00917651	YGL263W	2.30038
YGR243W	1.87628	3.43321e-06	YPR133C	-1.73191	0.00298771	YBR231C	-1.26599	8.00041e-05	YLR089C	1.12808	1.27216e-05	YDR384C	1.18063	0.000146553	YPR156C	1.10914	0.0146294	YBR012C	-4.73157	2.00244e-12	YDR040C	-2.47303	6.15106e-10	YMR023C	1.52615	2.37216e-07	YBR244W	1.87843	3.72465e-14	YKL086W	1.57837	0.0197031	YPR139C	1.09643	4.85803e-16	YPR119W	1.01427	3.08395e-06	YNL299W	-1.22605	0.00152311	YKL099C	2.08875	3.29821e-12	YOR236W	1.63516	0.00964098	YIL009W	1.1738
YCR005C	1.53863	7.80245e-06	YPR145C-A	-4.59682	0.00306455	YEL049W	-5.75111	8.00041e-05	YPR156C	1.20834	1.5552e-05	YKL213C	1.02095	0.000147214	YMR195W	1.05178	0.0168422	YLL039C	-1.8197	7.1262e-12	YDL234C	-1.39391	6.21544e-10	YLL058W	1.42743	2.40861e-07	YER001W	1.7237	4.51822e-14	YBR296C-A	3.28577	0.0277825	YLL016W	1.52999	7.41938e-16	YPL132W	1.40104	3.66583e-06	YBL043W	-1.26227	0.00159632	YIR015W	1.44011	3.29821e-12	YML087C	1.12772	0.00971322	YDR102C	1.45804
YDL206W	1.13219	1.21968e-05	YMR107W	-5.5828	0.00312926	YPR161C	-1.05726	9.09347e-05	YOR273C	1.49243	1.8264e-05	YLL027W	1.02987	0.000165011	YGL237C	1.00142	0.0175306	YGL032C	-1.29468	2.04003e-11	YHL024W	-2.27611	6.46533e-10	YGR062C	1.04994	2.60434e-07	YLR255C	2.17031	6.88496e-14	YDR274C	2.02026	0.0353166	YKL189W	1.72002	1.69176e-15	YBR246W	1.35811	3.97788e-06	YKL086W	-1.62689	0.00161837	YJR030C	1.2124	3.33269e-12	YHR087W	1.3679	0.0101843	YIL120W	1.27018
YOR296W	1.1213	1.34705e-05	YGL057C	1.02808	0.00312926	YKL023W	-1.17291	0.000116418	YBL104C	1.08053	1.84673e-05	YDL215C	1.14754	0.000170776	YNL223W	1.20007	0.0182406	YJL116C	-3.17399	1.44159e-10	YKL109W	-2.21924	1.07361e-09	YOR022C	1.54048	3.21853e-07	YIL049W	1.42538	1.9132e-13	YHR093W	1.9761	0.0357979	YMR274C	1.80419	1.80824e-15	YCL001W	1.0593	4.08734e-06	YDR030C	-1.23851	0.00161837	YPL269W	1.20242	3.90686e-12	YGL134W	1.08207	0.0109921	YPL240C	1.37292
YOR352W	1.04323	2.40221e-05	YNR054C	-1.30214	0.00312926	YLR255C	1.47302	0.000146361	YCR085W	2.21646	1.90145e-05	YML051W	1.11096	0.000180294	YOR382W	1.49484	0.0208652	YGR032W	-2.66668	4.35382e-10	YML118W	-2.45456	2.40765e-09	YJR094C	1.0585	3.74152e-07	YIL029C	2.10445	1.95986e-13	YFR054C	1.06857	0.0387385	YLR404W	1.35813	2.08917e-15	YOR150W	1.14897	4.20313e-06	YPL189C-A	1.07229	0.00161837	YEL048C	1.76795	4.67407e-12	YHR214C-E	2.50409	0.0111905	YLR050C	1.62216
YDL044C	1.1126	2.938e-05	YOL108C	-1.20745	0.00312926	YDR299W	-1.14141	0.000151395	YJR051W	1.03969	2.08637e-05	YLR152C	1.40767	0.000184134	YEL024W	1.23146	0.0209905	YJL153C	-2.21925	6.05877e-10	YBR066C	-1.78299	2.68742e-09	YIL006W	1.60589	4.40518e-07	YKL055C	1.58135	2.60545e-13	YGL182C	1.46103	0.0407098	YHR140W	2.34023	2.28378e-15	YLR412W	1.29878	4.20313e-06	YNR074C	1.1299	0.00176581	YDL002C	1.18526	5.29853e-12	YLL061W	1.26342	0.0115416	YMR145C	1.05344
YPR200C	2.74944	5.63259e-05	YDR423C	-1.43623	0.00330475	YNL079C	-1.04286	0.000168987	YBR274W	1.10556	2.2436e-05	YOR065W	1.64235	0.000184134	YGR096W	1.06937	0.0232577	YLR460C	-1.48133	7.07897e-10	YNL259C	1.30156	4.75186e-09	YJL170C	1.74306	4.40648e-07	YGL143C	1.54467	4.43243e-13	YOR161C-C	1.53299	0.044389	YIL049W	1.36775	4.59678e-15	YPR071W	1.7785	4.2802e-06	YDR273W	-2.91093	0.0017742	YJR112W	1.40931	5.81146e-12	YIR030C	1.49371	0.011805	YLR127C	1.55367
YKR009C	1.16188	5.84868e-05	YDL197C	-1.21865	0.00336179	YKL192C	1.07285	0.000178703	YPL267W	1.68192	2.30625e-05	YLR246W	1.53758	0.000191992	YER057C	1.1415	0.0234409	YLR301W	-1.37603	1.0874e-09	YDL127W	-1.07821	5.63871e-09	YGR053C	2.52321	8.41436e-07	YPR068C	2.06367	7.06304e-13	YAL064W-B	1.21712	0.0460787	YDL048C	1.79308	4.75715e-15	YEL053C	1.27173	4.73054e-06	YCL048W	-2.72678	0.00178189	YOR243C	1.11139	6.47223e-12	YJR161C	1.60899	0.012384	YDL154W	1.1685
YMR023C	1.14932	6.23553e-05	YHR022C-A	1.51768	0.00352257	YER129W	-1.14517	0.00019472	YBR269C	1.80985	2.31032e-05	YLR265C	1.92357	0.000195335	YLR265C	1.07542	0.0244719	YDL243C	-2.98031	2.03342e-09	YBR182C-A	2.40373	6.35236e-09	YGR039W	1.00213	9.40967e-07	YLR263W	1.72192	8.13281e-13	YOL155C	-2.8653	2.47613e-34	YMR256C	1.47229	6.09208e-15	YOL002C	1.14926	4.75506e-06	YCR083W	-1.53825	0.00187667	YIL015W	1.24205	7.69024e-12	YPR010C-A	1.06241	0.0129386	YCL055W	1.41867
YCL055W	1.0687	6.23553e-05	YPL209C	-2.21577	0.00353217	YMR320W	-1.70445	0.000206689	YDR264C	1.06602	2.35243e-05	YPR094W	1.30626	0.000225256	YOR180C	1.4442	0.0253828	YEL071W	-2.89961	2.11578e-09	YIL101C	-1.93003	8.81555e-09	YLL063C	1.84986	9.53929e-07	YNL138W-A	1.43258	8.22757e-13	YER011W	-2.17869	4.80713e-29	YBR210W	1.88016	6.3301e-15	YIL119C	2.36934	7.53346e-06	YKL182W	1.00357	0.00195747	YNR034W	1.20276	7.74615e-12	YLR411W	1.54374	0.0133001	YDR281C	2.85876
YOL159C-A	1.02891	9.31085e-05	YMR311C	-1.7728	0.00353217	YPL150W	-1.02277	0.00021387	YLR265C	1.75347	3.53179e-05	YGR125W	1.10246	0.000226852	YOR137C	1.05752	0.0295835	YER150W	-2.1081	2.11578e-09	YBL003C	1.08361	1.04182e-08	YMR056C	1.1963	1.43006e-06	YLR154C	1.7139	9.638e-13	YML116W	-1.64091	4.43823e-23	YKL051W	1.42868	6.66258e-15	YHR022C-A	1.62115	8.45815e-06	YCL026C-A	-3.15256	0.00200914	YLR051C	1.56251	8.57367e-12	YOL013W-B	1.92196	0.0140474	YPR071W	1.41333
YOL101C	1.00474	0.000105653	YLR425W	-1.05823	0.00364523	YDR365C	-1.01804	0.000234581	YKR088C	1.20966	3.92424e-05	YDR376W	1.33506	0.00023763	YHR180W	1.41551	0.0301473	YBR240C	-4.51874	2.24499e-09	YIL122W	-2.13	1.08672e-08	YNL183C	1.18299	1.51989e-06	YGR016W	1.42337	9.638e-13	YGL255W	-2.69689	1.56053e-21	YPL125W	1.20058	8.39255e-15	YJR030C	1.11193	8.81009e-06	YPL209C	-1.84857	0.00211253	YNL248C	1.41816	9.55952e-12	YLR329W	2.00847	0.0146539	YMR256C	1.0011
YBR196C-A	1.06898	0.000128988	YGL258W	2.18684	0.00364523	YER066W	-1.28025	0.00025111	YEL024W	1.56135	4.42211e-05	YBR295W	1.22816	0.000250493	YNR075W	1.19308	0.0353691	YKR097W	-2.42549	6.01679e-09	YJR025C	-1.71702	1.1288e-08	YNL283C	1.0441	1.56472e-06	YGL194C-A	1.83885	1.07976e-12	YIL169C	-3.79631	4.74392e-21	YMR023C	1.9897	8.9363e-15	YGR024C	1.5855	1.2795e-05	YDR345C	1.39182	0.0023997	YGR283C	1.41347	1.17774e-11	YPR201W	1.76073	0.0146539	YAL046C	1.20261
YHR214W	1.5326	0.000292441	YIL089W	1.76703	0.00373699	YKL072W	-1.3215	0.000277002	YJL115W	1.11788	5.92701e-05	YEL024W	1.60438	0.000258823	YHR140W	1.50857	0.0359041	YOL105C	-1.24256	6.10553e-09	YNL160W	2.08958	1.21832e-08	YGR194C	1.02993	1.56472e-06	YKL208W	1.54506	1.19934e-12	YMR300C	-1.09793	1.74655e-19	YIL029C	1.4413	1.35825e-14	YIL014W	1.37315	1.50598e-05	YAL039C	1.17676	0.00283875	YER061C	1.23993	1.32452e-11	YMR303C	1.10523	0.0158752	YGL067W	1.10498
YKR058W	1.0085	0.000293891	YMR251W	-2.83009	0.00375812	YDR273W	-2.5519	0.000277924	YAR028W	1.40294	5.95244e-05	YPR057W	1.07498	0.000274868	YGL182C	1.46376	0.0411101	YPR007C	-4.65034	6.37752e-09	YIL089W	1.68784	2.09407e-08	YJL100W	1.53057	1.62593e-06	YOL013W-B	2.7947	1.56258e-12	YOR384W	-3.11708	9.55673e-18	YBR244W	1.09743	1.40788e-14	YBR096W	1.0214	1.63619e-05	YGR129W	-1.80147	0.00289939	YMR198W	1.42485	1.41058e-11	YBR296C	2.93441	0.0165666	YLR257W	1.00577
YDR085C	1.36979	0.000329645	YGL156W	-3.26751	0.00398234	YMR255W	-1.35997	0.00031929	YDR051C	1.16036	5.95244e-05	YNR074C	1.39045	0.000274868	YOR268C	2.20426	0.0417269	YGL156W	-3.28327	1.35884e-08	YPL218W	1.34426	2.57249e-08	YKL062W	1.45707	1.93936e-06	YCR095W-A	2.78479	2.2875e-12	YKL071W	-3.47941	2.19847e-16	YCR027C	1.18475	1.40807e-14	YPR139C	1.01685	1.63677e-05	YMR232W	-2.31908	0.00406733	YPR061C	1.65055	1.77112e-11	YGR221C	1.2389	0.0187458	YNR004W	2.16509
YNR004W	1.35967	0.000365576	YMR225C	1.02602	0.00414238	YDL123W	1.1483	0.00037092	YPR194C	2.66662	6.71788e-05	YDL238C	1.29099	0.000328022	YCR018C-A	1.75967	0.0478737	YMR206W	-2.21126	2.48244e-08	YPL015C	1.33849	2.84325e-08	YGL263W	3.04972	2.48969e-06	YJR011C	2.35331	2.42536e-12	YIL134C-A	-2.25556	1.10539e-12	YGL157W	1.62483	1.45213e-14	YOR367W	1.37054	1.63677e-05	YKR011C	-1.16483	0.00462165	YAR033W	1.76426	1.92152e-11	YMR081C	1.36929	0.0194373	YDR309C	1.11804
YPR201W	2.11136	0.000402279	YGR221C	1.68339	0.00414238	YER162C	-1.11844	0.000398912	YKR092C	1.13611	7.32744e-05	YLR256W-A	1.17909	0.000340256	YAL062W	1.25476	0.0490741	YER187W	-3.91433	2.48244e-08	YOR178C	-4.64333	2.84325e-08	YPL076W	1.1033	2.53624e-06	YOR179C	1.36856	2.96908e-12	YOR032C	-2.94004	2.01908e-10	YGR126W	1.43273	1.67559e-14	YNL035C	1.24131	1.77987e-05	YJL196C	1.26322	0.00472721	YOL002C	1.25442	2.15042e-11	YFL012W	4.30802	0.0198148	YGL176C	1.14025
YLL063C	1.25115	0.000577005	YNR062C	-3.63456	0.00467231	YDL213C	-1.16672	0.000409278	YKR100C	1.0502	8.18278e-05	YMR225C	1.06091	0.000443778	YJR108W	1.16925	0.0491538	YBR105C	-2.3252	3.48592e-08	YLR364W	1.55705	3.83663e-08	YIR029W	1.66738	2.95055e-06	YBL029W	2.10517	3.36716e-12	YDL239C	-1.80736	5.88613e-10	YDR336W	2.04868	1.91872e-14	YOR130C	1.19517	1.96713e-05	YPL220W	1.11165	0.00479997	YLR263W	1.47354	2.36908e-11	YLR345W	1.03673	0.0205281	YAR070C	3.02584
YBR066C	1.10725	0.00060382	YIL046W	-1.09708	0.00478497	YMR225C	1.03928	0.000417434	YBR293W	1.01083	9.07211e-05	YFR048W	1.10542	0.000467795	YLR237W	-2.65889	2.46749e-21	YPL058C	-1.75035	6.17998e-08	YJR130C	-1.35918	4.39027e-08	YPR120C	1.00063	3.0116e-06	YCL064C	1.66735	3.36716e-12	YOR128C	-1.01424	1.19917e-08	YLR453C	2.05112	2.81462e-14	YBR030W	1.0098	1.99127e-05	YJL116C	-1.00965	0.00479997	YMR310C	1.6767	2.55555e-11	YOL157C	1.71498	0.0207375	YOL159C	1.13838
YMR136W	1.10855	0.000618541	YBR013C	1.05114	0.00484231	YOL155C	1.43629	0.000417434	YBL038W	1.19207	9.09499e-05	YGR239C	1.34887	0.00047074	YBL071C-B	-4.39833	9.99296e-19	YKR039W	-1.16169	7.54605e-08	YPL171C	-2.9314	4.83387e-08	YLR213C	1.70097	3.22054e-06	YCR098C	2.62349	3.70055e-12	YNL160W	-1.42657	1.39952e-08	YLR452C	1.22145	2.90135e-14	YDL181W	2.20596	2.04553e-05	YPL230W	-1.4361	0.00485604	YLR003C	1.56613	3.29002e-11	YBR147W	1.61753	0.0213462	YNL279W	1.37786
YDR171W	1.03934	0.000696433	YDR314C	-1.12502	0.00516625	YPR195C	1.48706	0.000418448	YIL056W	1.12725	0.000102389	YLR039C	1.0439	0.000482209	YHL012W	-3.95503	2.90228e-14	YNL208W	-1.28219	8.30365e-08	YIL013C	1.35267	5.01374e-08	YFR025C	1.01483	4.34331e-06	YPR116W	1.79094	4.17835e-12	YDR365C	-1.1415	3.41406e-08	YGR286C	1.46439	3.1219e-14	YER001W	1.22609	2.04553e-05	YBR093C	2.23029	0.00485604	YIR033W	1.41664	3.52281e-11	YNR060W	1.51221	0.0213746	YOR152C	1.21971
YAR033W	1.05335	0.000734056	YJL144W	-3.02953	0.00516625	YDR132C	-1.57929	0.000423313	YOR306C	1.63629	0.000109302	YDR404C	1.07907	0.000515549	YMR057C	-3.94312	6.72032e-14	YAL067C	-2.9589	1.3846e-07	YDR225W	1.30763	5.07752e-08	YNL126W	1.01395	5.39972e-06	YLR306W	1.50403	5.23939e-12	YBL071C-B	-2.38387	1.21434e-07	YOL025W	1.46534	4.04696e-14	YOL094C	1.14039	2.09542e-05	YKL143W	-1.03209	0.00532962	YIL104C	1.13796	4.12828e-11	YDL210W	1.41428	0.0217367	YLR030W	2.29042
YEL068C	1.17308	0.000860072	YHR086W-A	2.18296	0.00516625	YER188W	1.92173	0.000539711	YOR367W	1.43786	0.000116269	YDL237W	1.28623	0.000529557	YIR042C	-2.51412	3.04768e-12	YBR085C-A	-1.40479	1.44449e-07	YCL074W	-5.20658	5.27015e-08	YHR086W-A	2.99094	6.01088e-06	YHL044W	3.24999	5.23939e-12	YCL064C	-1.06556	9.21123e-07	YIL015W	1.59778	6.04939e-14	YNR074C	1.19118	2.82333e-05	YIL054W	-2.14737	0.00549608	YMR184W	1.49292	4.39118e-11	YDR018C	1.97	0.0233094	YOR316C-A	2.00918
YIL014C-A	1.06311	0.00137171	YIL112W	-1.21082	0.00516625	YBR210W	1.14317	0.000617215	YAR027W	1.18581	0.000120453	YDL128W	1.02519	0.00054984	YNL279W	-2.60163	4.01784e-12	YNL268W	-1.10501	1.50254e-07	YGL251C	-1.5279	5.28152e-08	YOR316C-A	2.10073	6.4627e-06	YOR180C	1.90545	6.3829e-12	YJL052W	-1.17125	2.09531e-06	YNR034W	1.47751	6.13482e-14	YGR278W	1.02072	3.39207e-05	YKL172W	-1.5828	0.00601035	YLR363W-A	1.48148	4.7343e-11	YOR237W	1.6469	0.0235231	YLR108C	1.10849
YOL013W-B	1.38851	0.00146863	YAR053W	2.44491	0.00516625	YOL092W	1.05155	0.000660347	YJL062W-A	1.12602	0.000122329	YGL160W	1.31698	0.000579267	YDR374C	-5.50431	3.20728e-10	YDL171C	-1.27809	1.60082e-07	YFL050C	-1.49361	6.17267e-08	YGL255W	1.72986	6.68045e-06	YGL254W	1.45955	8.75102e-12	YAL062W	-1.63745	2.23816e-06	YHR094C	4.63504	8.31876e-14	YDR261C	1.21577	3.4017e-05	YKL093W	-2.06127	0.00601035	YLR446W	1.62679	6.71429e-11	YBR186W	2.58334	0.0257783	YLR049C	1.20354
YCR007C	1.11976	0.00153942	YER054C	-3.92986	0.00520188	YKL001C	1.00781	0.000660347	YLR137W	1.15333	0.000132429	YLL028W	1.20934	0.000579267	YOL104C	-2.01861	8.00083e-10	YJL037W	-3.78031	2.89384e-07	YLR257W	1.01458	7.5371e-08	YGL182C	1.90589	6.71197e-06	YLR453C	1.85169	9.40462e-12	YJR153W	-1.92644	2.93615e-06	YLR364W	1.59118	1.20969e-13	YIL049W	1.78252	4.00334e-05	YER162C	-1.30324	0.00601035	YGR037C	1.22116	7.16855e-11	YBR047W	1.10978	0.0281258	YDR222W	1.58449
YHR216W	1.27076	0.00233816	YOL033W	1.04648	0.00535876	YER188C-A	3.18407	0.000684392	YGR121W-A	1.99179	0.000132429	YGL017W	1.43883	0.000587298	YHR015W	-3.11683	4.60157e-09	YLR023C	-1.32283	4.93174e-07	YKL189W	-1.2711	8.03418e-08	YER084W	3.12912	7.04039e-06	YPR155C	1.29384	1.16028e-11	YJR025C	-1.19515	5.1983e-06	YER075C	1.23906	1.50126e-13	YML104C	1.10301	4.06425e-05	YMR227C	-1.70153	0.00601035	YCL047C	1.27865	7.24815e-11	YBR196C-A	1.34429	0.0282497	YNL334C	2.22397
YBR072W	1.3663	0.00310571	YBR231C	-1.7654	0.00542585	YPL246C	1.03397	0.000789401	YNR001C	1.46944	0.000135667	YPL098C	1.00557	0.000631298	YOL015W	-2.51426	1.51938e-08	YCL048W	-3.77524	6.20567e-07	YGR143W	-1.45704	8.18733e-08	YGL032C	1.56483	8.57762e-06	YIL089W	1.74552	1.74601e-11	YAL037W	-2.78351	6.43361e-06	YOR344C	1.27731	2.95435e-13	YCL021W-A	2.26093	4.37609e-05	YBL071C-B	-1.5201	0.00613802	YDL008W	1.69772	7.82139e-11	YBR297W	1.58742	0.028433	YDR072C	1.12858
YGR088W	1.11891	0.00602702	YLL060C	-2.28547	0.00543393	YNR070W	1.61742	0.000967916	YJL117W	1.27301	0.000137248	YGR108W	1.03033	0.000663799	YOR216C	-1.31394	2.22528e-08	YDL241W	-1.85972	1.02064e-06	YNR014W	1.89296	1.20752e-07	YHR171W	1.37734	9.46139e-06	YOR238W	1.81994	2.29338e-11	YCR014C	-1.27365	6.43361e-06	YJR054W	1.05313	2.9979e-13	YCR085W	2.45112	4.4606e-05	YHR088W	-1.49143	0.00621484	YIL040W	1.29996	8.79338e-11	YKL026C	1.13894	0.02844	YBR196C-B	1.29871
YHR180W	1.1032	0.0103486	YDR217C	-1.24866	0.00552691	YLR323C	-1.22889	0.00114026	YMR094W	1.52325	0.000140648	YJR131W	1.26939	0.000695487	YJL153C	-3.78582	1.33541e-07	YDR403W	-3.721	1.36411e-06	YPL274W	-1.50433	1.21132e-07	YJL163C	1.32375	1.05591e-05	YHR180W	3.15874	2.56397e-11	YGL029W	-1.44227	6.90137e-06	YGR263C	1.68145	3.8725e-13	YNL001W	1.33977	5.14495e-05	YER054C	-2.14668	0.00621484	YLL059C	2.05029	1.22866e-10	YDR070C	1.77277	0.0294719	YIR015W	1.75518
YJL215C	2.32075	0.012308	YHR123W	1.15558	0.0061528	YOL159C	1.47182	0.00119405	YJL011C	1.26686	0.000141154	YDR493W	1.55986	0.000710634	YML058W-A	-3.89835	2.15496e-07	YLR134W	-1.65576	1.36411e-06	YOR180C	1.03656	1.26545e-07	YJR053W	1.03389	1.16205e-05	YER062C	2.0033	2.64678e-11	YOR306C	-1.1008	1.745e-05	YKL055C	1.54953	4.01004e-13	YDL127W	1.29011	5.21959e-05	YDL037C	1.48593	0.0063469	YLL012W	1.77707	1.33336e-10	YLR004C	1.43727	0.0312821	YDL059C	1.11533
YLL062C	1.02028	0.0124343	YER044C-A	1.33087	0.00644222	YDR246W-A	1.00771	0.00120116	YOR065W	1.50294	0.000143064	YEL072W	1.27708	0.000850077	YBR186W	-3.9957	4.52667e-07	YBR067C	-1.42481	1.39869e-06	YHR217C	-5.58903	1.43549e-07	YGL143C	1.11478	1.66971e-05	YLR411W	2.79819	3.20153e-11	YJL116C	-1.21524	2.03141e-05	YDR261C	1.14314	4.72927e-13	YJL201W	1.11688	5.62275e-05	YCR030C	-1.10626	0.00842805	YOR056C	1.44667	1.49843e-10	YGL258W	1.47182	0.0312821	YOL013W-B	1.83454
YDR274C	2.4421	0.0169068	YIL120W	1.69859	0.00666008	YMR274C	1.00037	0.00133144	YDL046W	1.22096	0.000144794	YCR085W	1.68714	0.000898165	YKL216W	-1.61347	4.84097e-07	YNL065W	-1.3254	1.54139e-06	YIR042C	-1.65771	1.68183e-07	YKR106W	3.57314	1.83087e-05	YOR149C	1.48144	3.39372e-11	YLR264C-A	-2.16675	2.40834e-05	YOL003C	1.20496	6.73522e-13	YDL002C	1.46345	5.70782e-05	YJR160C	3.82511	0.00898219	YIR009W	1.51332	1.6634e-10	YHR180W	1.08475	0.0319102	YER044C-A	1.65464
YJL206C	1.02757	0.018477	YJL205C	1.86167	0.0066615	YLR445W	-3.15508	0.00143039	YOL073C	1.38464	0.000144794	YLR099W-A	1.38706	0.000947933	YOR091W	-1.42261	5.40816e-07	YMR315W	-1.28415	1.57508e-06	YHR124W	-1.88689	2.05459e-07	YCL005W	1.02699	1.99261e-05	YKL001C	1.42114	3.51052e-11	YBR054W	-2.37556	4.37359e-05	YOR367W	1.08489	7.97338e-13	YDR459C	1.14948	6.03085e-05	YLR345W	-1.08389	0.00898219	YPL001W	1.28201	1.6839e-10	YBR045C	1.2229	0.0321909	YJR094C	1.47645
YHR124W	1.11551	0.0189084	YKR020W	-1.61159	0.00672882	YGR121W-A	1.07765	0.00143039	YCR006C	1.76753	0.00014885	YBL029C-A	1.40376	0.00095174	YGL156W	-2.4193	1.63378e-06	YJL089W	-4.40763	1.76027e-06	YKL008C	1.31461	2.29531e-07	YOL126C	1.07994	2.01373e-05	YJL217W	1.41281	4.23372e-11	YNL237W	-1.66415	4.86321e-05	YAR023C	1.92939	8.83163e-13	YLR265C	1.38181	6.83687e-05	YDR380W	-1.57334	0.00898219	YBL086C	1.33706	1.80418e-10	YDR223W	1.5804	0.0328153	YCR060W	1.03297
YPL279C	1.04313	0.0198719	YMR227C	-2.0491	0.00672882	YDR218C	-3.12936	0.00143477	YOR383C	2.9898	0.000150344	YLL002W	1.23718	0.00101838	YER123W	-1.40223	1.68656e-06	YLR307W	-3.86798	1.90454e-06	YGL156W	-1.79353	2.37131e-07	YDL181W	1.53469	2.17969e-05	YHR035W	2.09299	6.27283e-11	YHR177W	-2.0114	6.01881e-05	YOL122C	1.53703	9.11437e-13	YPR057W	1.16754	6.92255e-05	YML043C	-1.35564	0.00910738	YJL212C	1.63495	2.40654e-10	YCR085W	1.01226	0.0332277	YHR001W-A	1.10461
YOR268C	1.1346	0.0238879	YKL023W	-1.73275	0.00757804	YMR219W	-1.18044	0.0014753	YGR255C	1.13528	0.000151986	YMR291W	1.16752	0.00104116	YHR177W	-2.78071	2.21911e-06	YPR002W	-3.37122	2.00791e-06	YDR132C	-1.31498	2.75807e-07	YPL036W	1.3592	2.76898e-05	YPL015C	1.20651	6.29901e-11	YNR064C	-2.58575	6.01881e-05	YBR292C	2.19678	1.33266e-12	YBR101C	1.07525	7.05015e-05	YLR025W	-1.14457	0.0092172	YLL018C-A	1.48104	2.43838e-10	YOR190W	1.44012	0.0337572	YNL078W	1.20138
YDL210W	1.48799	0.0276017	YOR287C	-1.2836	0.00787208	YKL050C	-1.27006	0.0015396	YNL300W	1.50055	0.000155658	YPL161C	1.07631	0.00104116	YDL021W	-2.17155	2.5768e-06	YER164W	-1.07008	2.01216e-06	YLL060C	-1.62785	2.96666e-07	YER088C	1.13202	2.84853e-05	YLR404W	1.23146	7.92272e-11	YIR030C	-1.42306	8.32911e-05	YBL003C	1.13988	1.54618e-12	YPL111W	1.21184	7.70661e-05	YGL174W	-1.09414	0.0092172	YNL110C	1.12177	2.68899e-10	YOR314W-A	2.27417	0.036377	YJR054W	1.20861
YOR050C	1.23944	0.0279177	YGL029W	-1.2151	0.00846342	YHR214W	2.19006	0.00157552	YGL159W	1.17321	0.000160709	YPL103C	1.22255	0.00113251	YER111C	-1.64046	4.19281e-06	YNL160W	-2.31061	2.2319e-06	YIL015W	-1.21452	3.17952e-07	YPR071W	1.41407	2.87074e-05	YLL002W	1.37869	1.20629e-10	YLL060C	-1.00913	0.000106724	YNL086W	1.4963	1.99948e-12	YOL101C	1.52813	7.87372e-05	YPR145C-A	-3.20176	0.00935252	YAL025C	1.43283	2.90127e-10	YGR059W	2.01543	0.037104	YBL016W	1.49427
YHL015W-A	1.92169	0.0290898	YDL213C	-1.35888	0.00857104	YKL102C	1.91428	0.00185841	YLR246W	1.3688	0.000161333	YDL227C	1.01789	0.00132385	YIL037C	-3.85142	5.27761e-06	YGL253W	-1.31117	2.35422e-06	YJL004C	1.11379	4.30403e-07	YML050W	1.0243	3.07148e-05	YBL107C	1.39207	1.26166e-10	YER187W	-2.47105	0.000177599	YHR001W-A	1.70967	2.00113e-12	YGL182C	2.91217	8.00602e-05	YLR168C	-1.05314	0.00936648	YGR187C	1.35489	2.95233e-10	YHR177W	1.34948	0.039027	YHR140W	1.09843
YOR008C-A	2.08075	0.0320098	YKL071W	-3.92293	0.00860861	YNR075W	1.07261	0.00200456	YEL048C	1.01335	0.000229864	YGR246C	1.05744	0.00138571	YBR045C	-2.78102	6.82871e-06	YMR057C	-2.88251	3.08359e-06	YOL147C	1.33171	4.6292e-07	YFR029W	1.17719	4.13933e-05	YDR282C	1.84149	1.63457e-10	YOR383C	-1.15513	0.000340707	YBR157C	1.54666	2.01616e-12	YBR039W	1.16122	0.000101594	YHR079C-A	-4.53434	0.0099269	YDR261C	1.14672	3.71851e-10	YGL121C	1.45326	0.0414129	YGR263C	1.06229
YIL054W	1.10954	0.0335088	YGR067C	1.37405	0.00862459	YGR249W	1.75755	0.00211062	YOL012C	1.21841	0.00025852	YDR313C	1.02441	0.00144737	YCR018C	-1.5538	8.52746e-06	YIL073C	-2.47788	3.52063e-06	YBL016W	-1.40572	4.77817e-07	YOR268C	2.88805	4.71101e-05	YJR094C	2.17901	1.68253e-10	YGL101W	-1.05409	0.000945451	YIL089W	1.86291	2.29546e-12	YPR094W	1.13858	0.000104909	YBR208C	1.0093	0.0102394	YPR194C	2.19553	3.93012e-10	YDL196W	1.45458	0.0420542	YDL037C	1.92833
YJR150C	2.64311	0.0347287	YOR390W	2.15729	0.00921015	YGR271C-A	-1.21854	0.00213869	YMR233W	1.28667	0.000261739	YLR255C	1.88876	0.00150855	YLR341W	-4.11267	1.47379e-05	YHL048W	-2.43429	3.52063e-06	YGL263W	-2.57723	5.438e-07	YDR014W	1.17247	5.13881e-05	YEL068C	1.63794	1.95915e-10	YGL189C	-1.00237	0.00138876	YCR095W-A	1.88337	3.90725e-12	YCR002C	1.22622	0.000114882	YOR287C	-1.23159	0.0103819	YKL078W	1.20653	5.2364e-10	YPR002C-A	4.35029	0.0426604	YGR201C	1.05056
YJR161C	1.80792	0.0364888	YFL050C	-1.72816	0.00980015	YHR022C-A	1.02868	0.0022418	YBR070C	1.10565	0.000277106	YIL062C	1.09818	0.00161951	YGL263W	-2.78789	1.6132e-05	YBR085W	-1.78087	3.75704e-06	YJL089W	-3.52666	5.83275e-07	YDL206W	1.29521	5.19342e-05	YGR107W	1.74552	2.21623e-10	YGR236C	-2.46501	0.00170744	YDL206W	1.5768	3.97145e-12	YBR122C	1.14523	0.000117517	YDL079C	-1.9614	0.0106649	YHR123W	1.01326	8.10843e-10	YMR158C-A	1.62742	0.0430524	YKL055C	1.1318
YAL063C	1.41127	0.0408132	YER161C	-1.15443	0.0101504	YMR090W	-1.15936	0.0022609	YGR096W	1.75779	0.000328589	YIL074C	1.04353	0.00168348	YBL072C	-4.08104	1.62966e-05	YDR034C-A	-3.88282	4.42797e-06	YHR156C	-2.06121	5.85814e-07	YDR535C	2.69082	5.33874e-05	YDR132C	2.17825	2.21752e-10	YIR027C	-1.63462	0.00374485	YGL184C	2.77183	3.97145e-12	YEL024W	1.38777	0.000126166	YMR095C	-2.25882	0.0112852	YKL069W	1.56737	8.59326e-10	YKL065W-A	1.71607	0.0454842	YJL116C	1.54741
YNR064C	-5.56196	2.04618e-62	YMR240C	-1.7651	0.010524	YLR345W	-1.01103	0.00233233	YIL077C	1.00212	0.000387004	YMR315W	1.04382	0.00168348	YJR094W-A	-2.50814	1.80329e-05	YAL066W	-5.0993	4.46143e-06	YOL152W	-1.99039	7.10841e-07	YHR202W	1.85229	5.41722e-05	YCR101C	2.50767	2.97232e-10	YCL001W-A	-1.80733	0.00424543	YCR018C-A	2.40859	3.97745e-12	YDR106W	1.39747	0.000149844	YAL037W	-1.54126	0.0112852	YJR124C	1.28229	1.22062e-09	YAR070C	2.16175	0.0457649	YBR054W	1.62456
YOL155C	-3.68248	2.89993e-50	YPR068C	1.03522	0.0105372	YLL057C	1.53471	0.00233233	YPL076W	1.19983	0.00038761	YKL192C	1.004	0.00168487	YOL152W	-2.65023	1.97542e-05	YNR071C	-2.97836	5.92206e-06	YJL052W	-1.7801	7.79351e-07	YJL083W	1.19945	6.12709e-05	YHL048W	2.4233	3.51259e-10	YMR320W	-1.34724	0.00438246	YIL039W	1.05365	6.37401e-12	YBR083W	1.31418	0.000153051	YGR161W-C	1.32357	0.0117871	YGR113W	1.41694	1.3118e-09	YCR018C-A	1.01421	0.0474935	YER084W	1.65717
YBL043W	-3.47894	1.81989e-43	YFR026C	-2.83005	0.0107218	YLR390W	1.12736	0.00272798	YOL054W	1.25463	0.000425966	YML129C	1.06063	0.00176697	YDR285W	-2.76786	2.49589e-05	YBR021W	-1.66494	7.84271e-06	YPR138C	1.32875	9.85592e-07	YIL089W	1.66889	6.32268e-05	YJL157C	1.01763	3.87513e-10	YIL037C	-1.80781	0.00641119	YLR152C	1.21982	7.67549e-12	YKL154W	1.03933	0.000153528	YCR003W	-1.10395	0.0124705	YDR176W	1.2948	1.32744e-09	YOR161C-C	1.31805	0.049994	YHR202W	1.10382
YBL098W	-2.03788	4.25602e-27	YOL159C-A	1.03519	0.0107218	YHR156C	-1.48733	0.00282127	YPL103C	1.31129	0.000534071	YJR073C	1.38946	0.00186171	YMR232W	-2.69003	2.79716e-05	YLR054C	-3.58042	8.00949e-06	YER184C	-1.12515	1.01085e-06	YLR091W	1.45397	6.66917e-05	YHR123W	1.23795	3.95809e-10	YBR072W	-1.12379	0.00895218	YOL033W	1.54281	9.37652e-12	YPR158W	1.48423	0.000158456	YMR240C	-1.21184	0.0127929	YGR173W	1.59515	1.566e-09	YDR462W	-1.3833	7.21994e-11	YJL144W	1.32484
YMR062C	-1.5155	5.09469e-23	YMR150C	1.18315	0.0107491	YPR096C	1.06533	0.00282127	YBR057C	1.09042	0.000559557	YGL037C	1.00704	0.00203838	YMR014W	-1.17219	2.87737e-05	YHR216W	-1.7541	8.00949e-06	YJL103C	-2.56147	1.2243e-06	YDR317W	1.76159	6.67197e-05	YDR261C	1.16513	4.36635e-10	YPL171C	-1.37105	0.0122253	YBR196C-A	1.84553	1.06124e-11	YOR097C	1.13149	0.0001588	YGR244C	-1.30583	0.0127929	YCR082W	1.28735	1.84803e-09	YFR019W	-1.19437	9.75582e-11	YLR346C	1.41843
YIL169C	-3.79852	1.37063e-21	YPR002C-A	7.72408	0.0111238	YGL098W	-1.32208	0.00288079	YHR022C-A	1.46596	0.000565317	YOR179C	1.30221	0.00205517	YDL079C	-3.25193	3.55389e-05	YER138W-A	-1.65836	9.20126e-06	YPR007C	-3.67212	1.32757e-06	YHR176W	1.58165	6.90089e-05	YKR009C	1.95128	4.38971e-10	YNL018C	-2.12616	0.0140212	YOR180C	1.51402	1.13601e-11	YLR036C	1.33582	0.000166312	YCL001W-A	-2.81386	0.0131398	YDR437W	1.05991	2.73269e-09	YMR311C	-1.20616	3.67815e-10	YPR195C	1.12807
YJR109C	-1.46232	3.76142e-21	YMR095C	-3.87619	0.0111238	YKL095W	-1.52412	0.00292867	YNL074C	1.4657	0.000608773	YDR351W	1.11206	0.00206737	YMR263W	-1.47523	3.63643e-05	YMR017W	-4.7169	9.63007e-06	YML059C	1.02221	1.5654e-06	YEL073C	2.54319	7.14237e-05	YPR201W	4.1497	4.46916e-10	YNL034W	-2.94242	0.0168777	YMR042W	1.61633	1.18836e-11	YDR410C	1.61132	0.000176071	YHR047C	1.01524	0.0131398	YBL013W	1.40532	3.31782e-09	YBR016W	-1.25883	6.35482e-09	YLR364W	1.16697
YGR110W	-2.98285	1.54909e-16	YDL219W	1.18525	0.011211	YJR108W	1.14365	0.00305433	YDR291W	1.08136	0.000645608	YLR144C	1.0297	0.00213274	YOR177C	-3.62452	4.74554e-05	YBR045C	-2.53283	1.00535e-05	YIR039C	-2.54479	1.5654e-06	YIL001W	1.01398	7.25335e-05	YGR263C	1.50532	4.80518e-10	YER053C-A	-1.28664	0.0170173	YOR273C	1.78975	1.25155e-11	YDR309C	1.16806	0.000205772	YDR299W	-1.5389	0.0131971	YFR018C	1.71955	4.19233e-09	YIL126W	-1.00832	9.01458e-09	YBR062C	1.02193
YLR307W	-3.93342	3.78946e-16	YOR123C	-1.09657	0.0122492	YJR085C	1.00195	0.00331745	YIR014W	1.61517	0.000647677	YCR006C	1.73974	0.00232075	YGR129W	-1.54823	6.33636e-05	YNL279W	-1.93978	1.02609e-05	YBR208C	1.35877	1.75118e-06	YNL086W	1.16909	9.54802e-05	YPL257W	2.11921	5.39711e-10	YJL144W	-1.03349	0.0232613	YIL051C	1.02949	1.72007e-11	YLR154C	1.58173	0.000216974	YKL050C	-1.45245	0.0143717	YPL267W	1.26374	4.53881e-09	YOR091W	-1.13556	1.38069e-08	YOR288C	1.05019
YHR177W	-2.52746	6.77548e-13	YKL050C	-2.49559	0.0122492	YPR094W	1.13412	0.00331745	YML023C	1.13358	0.000672489	YPL058C	1.1664	0.00254948	YPR133C	-1.18289	6.33636e-05	YGL180W	-1.15277	1.23253e-05	YJL144W	-1.36003	1.7733e-06	YDR533C	1.3386	9.61639e-05	YHR176W	2.14323	5.92262e-10	YLR341W	-2.30103	0.0240648	YIR030C	2.65971	2.33705e-11	YDR298C	1.1235	0.000224051	YCR033W	-1.60641	0.0151152	YJR056C	1.25899	4.67667e-09	YER018C	-1.35	2.19403e-08	YKR060W	1.04143
YGL026C	-1.34471	9.33295e-13	YMR269W	-1.12005	0.0122492	YBR072C-A	1.54592	0.00335127	YNL035C	1.0426	0.000714883	YOR383C	2.17911	0.00265	YBR148W	-3.5353	7.08852e-05	YKR046C	-1.19627	1.26036e-05	YLL026W	-1.71517	1.79192e-06	YER079W	1.39658	0.000105804	YHR022C-A	1.56081	6.54033e-10	YGL089C	-3.07221	0.0275894	YIL040W	1.08539	3.28682e-11	YMR094W	1.24223	0.000228198	YPR018W	-1.35277	0.0153419	YER026C	1.00808	4.78556e-09	YER061C	-1.0926	9.25958e-08	YOR019W	1.17449
YFL062W	-4.7193	2.81302e-12	YIL122W	-1.99192	0.0122876	YDR012W	1.1988	0.00335127	YPL087W	1.10127	0.000723408	YJR077C	1.05561	0.00273098	YPR027C	-4.20391	7.90525e-05	YBR238C	-1.26756	1.49644e-05	YOR390W	1.57559	1.89905e-06	YOR161C-C	2.54042	0.000107211	YML087C	1.69805	7.87018e-10	YFL014W	-2.65293	0.029635	YPR020W	1.46518	4.13558e-11	YPR020W	1.21025	0.000235839	YLR151C	-1.01672	0.0154256	YLR390W	1.50068	6.54248e-09	YLR194C	-1.17875	9.77456e-08	YNL286W	1.15041
YHR071W	-1.29737	6.6966e-12	YLR323C	-1.71783	0.0124674	YMR207C	-1.01708	0.00355566	YOR064C	1.42242	0.000805131	YLR193C	1.08698	0.00306656	YFL014W	-6.12174	9.34386e-05	YJR119C	-1.61638	1.50337e-05	YCL005W	1.42926	2.08091e-06	YLL054C	1.02699	0.000108132	YAL061W	1.76557	8.71657e-10	YLR031W	-1.61574	0.0306874	YOR149C	1.17859	4.48553e-11	YMR225C	1.0044	0.000255969	YBR012C	-1.15714	0.015484	YNR044W	1.13739	7.78128e-09	YLL039C	-1.67969	1.10665e-07	YHR214W	1.26088
YNL237W	-2.36051	1.50989e-11	YIR030C	1.94538	0.0125415	YIL023C	1.06067	0.00378463	YPL020C	1.00462	0.000818857	YBR269C	1.21041	0.00321397	YGR192C	-3.75985	0.00010055	YML042W	-2.18923	1.81274e-05	YML085C	1.17003	2.08091e-06	YCR018C-A	2.56709	0.000108414	YCR007C	2.19187	8.90807e-10	YJR095W	-2.53716	0.0320255	YOR137C	1.30392	4.84254e-11	YGL194C-A	1.48542	0.000287184	YGR201C	1.11178	0.0161087	YOR305W	1.0188	7.9994e-09	YIR015W	-1.01238	1.25589e-07	YHR054C	1.60418
YBR047W	-1.84149	4.10045e-11	YBR072W	-3.04364	0.0127227	YNL334C	2.68013	0.0039828	YJR077C	1.41466	0.000818857	YBL089W	1.07858	0.00485853	YBR118W	-4.4485	0.00010055	YOR010C	-1.48035	2.55048e-05	YLL041C	-1.05116	2.10308e-06	YMR250W	1.31961	0.000110638	YHR124W	2.46879	9.02156e-10	YDR380W	-1.38791	0.0320996	YIL132C	1.62029	4.93345e-11	YDR123C	1.47142	0.000291526	YFL008W	-1.00208	0.0161193	YBL028C	1.54575	9.36718e-09	YMR263W	-1.15621	1.25589e-07	YCL021W-A	1.22927
YDR299W	-1.11863	8.3194e-11	YFL014W	-3.92332	0.0127483	YLR309C	-1.16749	0.00402623	YLR381W	1.0108	0.000943531	YPR191W	1.27386	0.00491425	YMR128W	-1.07412	0.000115385	YNR073C	-4.01739	2.75882e-05	YMR280C	-2.58431	2.45253e-06	YKL189W	1.05321	0.000113812	YMR169C	1.92902	1.05297e-09	YPR145C-A	-1.82575	0.0332462	YBL107C	1.20297	5.56665e-11	YNR061C	1.22947	0.000293211	YOR177C	-2.72545	0.0161345	YMR270C	1.11241	9.81277e-09	YOL155C	-1.78205	7.57653e-07	YKR106W	1.56648
YDL148C	-1.08754	1.17316e-10	YOR280C	1.01952	0.0129827	YPL209C	-1.87376	0.00412206	YGR016W	1.17696	0.000943531	YBL013W	1.1803	0.00492637	YJL043W	-4.37022	0.000124198	YHR179W	-1.16923	2.91403e-05	YLR273C	-1.47742	2.68321e-06	YDR448W	1.01245	0.000126815	YDL241W	2.22971	1.63344e-09	YHL012W	-1.20088	0.0347568	YNL286W	1.29577	5.99352e-11	YGR187C	1.05564	0.000299589	YPR030W	1.27178	0.0161345	YGR109C	1.48301	1.08164e-08	YHR199C-A	-1.21914	9.25565e-06	YKR091W	1.08377
YNL277W-A	-1.9947	1.75063e-10	YOR192C	-1.70771	0.0133215	YJL106W	-1.45987	0.00416158	YLR059C	1.08695	0.000966229	YPR096C	3.39643	0.00502502	YNL018C	-4.07131	0.000142982	YLR142W	-1.00441	2.91403e-05	YMR255W	-1.69478	2.97425e-06	YGR263C	1.21893	0.000135167	YML042W	2.47906	1.78212e-09	YMR107W	-2.27273	0.0389016	YJR024C	1.18521	6.06969e-11	YKL096W	1.58508	0.000299589	YDR385W	1.00985	0.0161808	YMR009W	1.51046	1.10462e-08	YNL079C	-1.44389	1.1445e-05	YMR081C	1.03518
YIR027C	-2.49404	2.13557e-10	YJR150C	-3.24473	0.0138102	YKL096W	1.05351	0.00421619	YMR195W	1.58583	0.00111481	YMR094W	1.07195	0.00545013	YLR309C	-1.06627	0.00017835	YEL070W	-3.66447	3.4089e-05	YCL025C	1.11715	3.15963e-06	YDL039C	1.56578	0.000140017	YDR286C	1.69159	1.81354e-09	YJL153C	-1.39146	0.0414454	YKL214C	1.34978	6.06969e-11	YGR295C	1.06437	0.000299589	YCR032W	-1.41066	0.0161808	YOL116W	1.20499	1.15743e-08	YJL144W	-1.38087	1.67979e-05	YIR042C	1.02282
YMR095C	-3.35464	3.81011e-10	YLR334C	3.16537	0.0142987	YDL048C	1.01568	0.00426135	YBR273C	1.04984	0.00112126	YCR095W-A	2.9509	0.00556669	YMR107W	-5.00616	0.00022812	YDL021W	-5.12997	3.65284e-05	YDR403W	-2.4438	3.20431e-06	YCL047C	1.23523	0.000158885	YMR151W	1.8905	2.07152e-09				YGR001C	1.55688	8.10813e-11	YDR529C	1.03852	0.000300916	YDL148C	-1.44505	0.0162846	YNL086W	1.25357	1.32491e-08	YJL052W	-1.39408	2.36561e-05	YAL009W	1.01924
YMR191W	-1.30838	4.91519e-10	YDR299W	-1.18033	0.0143598	YHR011W	-1.40455	0.00480021	YDL048C	1.39016	0.00117421	YOR273C	1.12111	0.00575414	YDL184C	-3.4126	0.000240094	YNR001W-A	-3.38037	4.03344e-05	YGL180W	-1.5188	3.25042e-06	YDR344C	2.19203	0.000159569	YBR161W	1.34094	2.22962e-09				YML087C	1.59787	8.5821e-11	YDR448W	1.28396	0.000310235	YNL133C	-1.20535	0.0162846	YDR102C	2.30449	1.38079e-08	YMR189W	-1.32479	3.3843e-05	YJL170C	1.26119
YOL152W	-1.93955	7.94144e-10	YIL049W	1.1501	0.0146961	YLR099W-A	1.00916	0.00480021	YNR075W	1.23202	0.00120259	YPR195C	1.81135	0.00595373	YGL189C	-2.91533	0.000248336	YOR134W	-4.02842	4.36721e-05	YOR091W	-1.09947	3.38379e-06	YCR027C	1.27662	0.000167596	YGL157W	1.81187	2.748e-09				YLR300W	1.35421	1.09649e-10	YOR044W	1.00009	0.000359661	YML109W	-1.02518	0.0162846	YHL025W	1.0475	1.40997e-08	YIL154C	-1.0795	7.55797e-05	YPL067C	1.1273
YKL218C	-1.65713	8.24074e-10	YCR018C-A	1.8174	0.0150739	YER054C	-1.66859	0.0048805	YDL224C	1.02123	0.00123462	YPR046W	1.38422	0.00618046	YKL050C	-1.61747	0.00032858	YJR004C	-1.97118	4.69501e-05	YNL015W	-1.70134	3.38379e-06	YIL111W	1.9269	0.000179432	YPR061C	1.52889	3.4062e-09				YDR131C	1.20457	1.22183e-10	YPL256C	1.11128	0.00036145	YDL214C	-2.13485	0.0162852	YMR117C	1.1821	1.73552e-08	YGR204W	-1.21074	0.000104188	YMR062C	-1.92944
YPR133C	-1.04167	1.2517e-09	YIL101C	-2.98566	0.0151041	YMR240C	-1.17756	0.00499095	YNR045W	1.00762	0.00129384	YIL054W	3.97161	0.00729506	YMR242C	-2.88637	0.000352624	YDR384C	-1.41084	4.74712e-05	YIL163C	-2.10046	4.80154e-06	YDL196W	2.95912	0.000193772	YBR013C	2.57544	3.4177e-09				YHR109W	1.11109	1.26792e-10	YDR415C	1.08418	0.000367571	YOL052C-A	-1.30839	0.0167787	YNL024C	1.59783	1.83625e-08	YOR128C	-1.04318	0.000105322	YLL017W	-3.97848
YBR256C	-1.55413	1.63775e-09	YGR009C	-1.10374	0.0151041	YJL217W	1.05758	0.00525021	YMR291W	1.06808	0.0013268	YPL203W	1.04611	0.00758484	YJL089W	-3.45171	0.000365314	YJR047C	-2.15779	6.7369e-05	YOL122C	1.00163	4.93241e-06	YML087C	1.28872	0.000195894	YLR035C	1.6378	3.42697e-09				YOR271C	1.08159	1.27578e-10	YNL025C	1.29044	0.000404047	YMR077C	-1.25141	0.0195	YKL216W	1.0125	1.95483e-08	YGL106W	-1.08722	0.000118421	YGR108W	-1.81633
YPR112C	-1.00972	1.70905e-09	YOR130C	1.07914	0.0152386	YGL182C	1.77322	0.00525146	YLL054C	1.04958	0.00133976	YHR001W-A	1.18127	0.00901092	YML073C	-3.067	0.000365732	YER065C	-1.21319	6.9669e-05	YJL102W	-1.5308	5.97447e-06	YPL014W	1.01022	0.000198458	YLR390W	1.45672	4.14396e-09				YJL196C	1.76676	1.47796e-10	YER180C-A	1.03608	0.000426982	YCL059C	-1.05554	0.0199066	YPL052W	1.10829	2.17178e-08	YAL013W	-1.00649	0.000199793	YPL223C	-2.78881
YGR129W	-1.28432	2.70068e-09	YDR171W	-2.33958	0.0156712	YKR095W	-1.08055	0.00537985	YDR106W	1.28157	0.00142571	YMR253C	1.05997	0.0105985	YLR388W	-3.10149	0.00036973	YHR177W	-2.50264	7.29903e-05	YJL217W	1.05388	6.57302e-06	YGR099W	1.06126	0.000198458	YHR063C	1.04949	4.39631e-09				YNL111C	1.13731	1.5086e-10	YFL002C	1.1292	0.000426982	YNL279W	-1.03565	0.0199066	YMR140W	1.22206	2.47231e-08	YBL071C-B	-1.46077	0.000317433	YIL066C	-1.95862
YBR105C	-1.24976	2.98572e-09	YIR034C	-1.1544	0.0157124	YDR472W	-1.38578	0.00600371	YOR152C	1.00225	0.00168224	YAL039C	1.14321	0.0109653	YAL018C	-4.74587	0.000375033	YHR044C	-1.48908	8.05593e-05	YKL026C	-1.53423	7.33119e-06	YLR030W	2.61106	0.000212324	YGL179C	1.56427	5.00515e-09				YPL256C	1.33536	1.7826e-10	YER168C	1.15832	0.000426982	YKL042W	-1.27504	0.0203929	YBL016W	1.75112	2.60794e-08	YGL234W	-1.19389	0.000349403	YGR110W	-2.89205
YNL124W	-1.12094	9.64209e-09	YML087C	1.35319	0.0157124	YDR274C	3.01573	0.00610932	YLR404W	1.46731	0.00192898	YOR284W	1.44243	0.0116164	YNR064C	-3.48226	0.000434763	YCR102W-A	-4.32889	8.50936e-05	YDL052C	1.2668	7.33119e-06	YCL016C	1.0139	0.000249177	YOR130C	1.14597	5.76223e-09				YKL208W	1.26181	1.83958e-10	YER091C	1.12381	0.000504228	YCR097W	-1.04358	0.0207305	YMR065W	1.22148	2.8285e-08	YOR383C	-1.88019	0.000430325	YHR071W	-1.8042
YNL065W	-1.34409	1.15032e-08	YER002W	-1.37974	0.0157124	YER185W	1.21872	0.00637347	YIL120W	1.01587	0.00199677	YGR255C	1.00135	0.0117298	YDR522C	-5.9565	0.000434763	YPR196W	-1.1821	8.61722e-05	YBR083W	-1.19273	7.41142e-06	YIL017C	1.09438	0.000263654	YBR066C	1.67775	5.99672e-09				YDR454C	1.14221	1.97574e-10	YPL129W	1.09863	0.000544502	YGL061C	-1.16197	0.0211786	YIL019W	1.63043	3.24931e-08	YDR295C	-1.12653	0.00119176	YMR280C	-3.13903
YML043C	-1.14403	1.57558e-08	YHL024W	-2.58969	0.01625	YLR124W	1.03999	0.00682026	YHR189W	1.15659	0.00203758	YOR390W	1.96896	0.0123128	YLR307C-A	-6.13747	0.000452606	YBR019C	-3.18573	9.0163e-05	YER175C	-1.20468	7.41142e-06	YLL057C	2.37901	0.00027997	YBR145W	1.75775	6.83336e-09				YLR255C	1.64499	2.50234e-10	YJR108W	1.66389	0.000580655	YNL237W	-1.29446	0.022199	YLR154C	1.61339	3.73963e-08	YOR382W	-1.5563	0.00121815	YIL011W	-4.66948
YGL059W	-1.27167	5.89297e-08	YGR161C	-2.5234	0.0167484	YCR014C	-1.27916	0.00734884	YGL248W	1.06706	0.00205563	YLR089C	1.16727	0.0134423	YJR145C	-2.92347	0.00048981	YIL037C	-2.74274	9.28248e-05	YCR043C	1.0291	7.46145e-06	YNR002C	1.63332	0.000296442	YOR008C-A	2.66103	7.38475e-09				YIR001C	1.4647	2.84302e-10	YGR172C	1.23365	0.000600799	YOL132W	-2.74087	0.0225737	YKL098W	1.16603	3.82643e-08	YPL209C	-1.21059	0.00172591	YBR072W	-3.40539
YGR239C	-1.07464	6.99301e-08	YDR043C	-2.10466	0.0173157	YDR380W	-1.56352	0.00838323	YCR101C	1.58829	0.00209092	YNL160W	1.23445	0.0175717	YPR132W	-2.70452	0.000555899	YOL152W	-1.88601	9.28248e-05	YFR017C	-2.32345	7.49586e-06	YGL057C	1.18053	0.000327264	YLL057C	2.88353	9.03576e-09				YNL145W	1.51678	2.86863e-10	YNL162W-A	2.11242	0.000610967	YPL248C	1.2347	0.0225737	YPL053C	1.00377	4.09129e-08	YGR129W	-1.06825	0.00188587	YKR097W	-2.41936
YML116W	-1.13013	3.81699e-07	YBR152W	-1.09224	0.0173157	YCR095W-A	1.0847	0.00859191	YPR166C	1.0609	0.00220801	YEL068C	1.84524	0.0180806	YHL024W	-2.08928	0.000555899	YOL157C	-2.07818	9.95824e-05	YBL013W	1.25099	8.31185e-06	YER181C	2.90746	0.000328651	YDR336W	1.53521	1.52408e-08				YKL130C	1.22917	3.37956e-10	YOR249C	1.18109	0.000683069	YLR264C-A	-1.79967	0.022627	YIL120W	1.36624	4.39166e-08	YBR082C	-1.10103	0.00215929	YPR148C	-1.09703
YGL156W	-1.64047	4.98146e-07	YJR083C	-1.05493	0.017486	YMR319C	-1.0459	0.0086092	YEL004W	1.04927	0.00231064	YPR194C	2.05675	0.0192062	YPR007C	-4.14048	0.000602411	YOL052C-A	-1.83862	0.00010063	YDL215C	1.09336	8.80741e-06	YKL048C	1.14887	0.000362094	YKL121W	1.36541	1.76947e-08				YOR390W	2.52032	3.38167e-10	YEL068C	1.99962	0.000688388	YBR054W	-1.43404	0.0249876	YBL078C	1.23171	5.17237e-08	YER084W	-1.53484	0.0040049	YML054C	-1.65293
YDR380W	-1.74478	2.84119e-06	YPR200C	2.81086	0.017486	YMR254C	2.35655	0.00866748	YJR135W-A	1.03908	0.00244143	YJR053W	1.13305	0.0192066	YGR271C-A	-1.07011	0.000629348	YOR178C	-2.82238	0.000106719	YPL248C	-1.5143	9.22098e-06	YIL152W	1.25957	0.000366041	YIL166C	1.81551	2.25038e-08				YIL028W	1.36348	3.46794e-10	YNL260C	1.40389	0.000700738	YHL044W	1.30913	0.0249876	YPL076W	1.02771	5.20015e-08	YBR072W	-1.31346	0.00412791	YER033C	-1.95448
YPL250C	-1.1064	2.99933e-06	YIL057C	-3.89372	0.017486	YML042W	1.14997	0.00879349	YDR493W	1.28749	0.00246435	YDR405W	1.02254	0.0196573	YNL079C	-1.68093	0.000629348	YLR266C	-2.07418	0.000130216	YJR154W	-1.6769	9.22098e-06	YKR010C	1.16397	0.000405112	YNL193W	1.56064	2.29499e-08				YPR116W	1.6178	3.68657e-10	YDR279W	1.18311	0.000703649	YKL049C	-1.07135	0.0250673	YPL077C	1.13986	5.31032e-08	YDR224C	-1.01287	0.00547803	YLR125W	-2.35078
YJR025C	-1.19385	2.99933e-06	YKL086W	-2.99692	0.017486	YAL063C	2.03386	0.0101936	YOR179C	1.35625	0.00255234	YMR210W	1.0566	0.0198953	YGR034W	-2.65519	0.000634995	YOL154W	-1.13986	0.000132579	YPR145C-A	-3.47474	9.99495e-06	YAR033W	1.09561	0.000413064	YGR108W	1.18218	2.33808e-08				YNR044W	1.45157	3.74968e-10	YPR046W	1.41106	0.000735157	YHR209W	-1.15173	0.0255948	YJL011C	1.2076	5.49532e-08	YBR011C	-1.24505	0.0072093	YIL099W	-3.56362
YGL263W	-1.95496	3.54133e-06	YPR201W	1.92483	0.0181584	YDL239C	-1.6568	0.0103956	YDR286C	1.48995	0.00263655	YJR067C	1.14513	0.0282414	YBR250W	-2.35831	0.000692051	YOR229W	-1.08254	0.000139534	YOR066W	-1.01645	1.02377e-05	YNL334C	5.096	0.000446759	YDL206W	1.6752	2.33808e-08				YPL196W	1.16141	4.51406e-10	YAR008W	1.14796	0.000809875	YOL091W	-2.01336	0.0258915	YNL191W	1.40711	5.58349e-08	YHL015W	-1.10307	0.0072093	YHL028W	-1.91175
YKR049C	-1.18709	4.9338e-06	YHR127W	-1.07073	0.0191905	YLR080W	-1.32139	0.0104771	YFR007W	1.21008	0.00296552	YDR246W-A	2.00021	0.0308501	YPL209C	-2.08267	0.000704704	YER062C	-2.4207	0.000140585	YFL062W	-4.18051	1.09088e-05	YDR170W-A	1.05195	0.00047076	YHR097C	1.60305	2.53144e-08				YJR011C	1.9816	5.10671e-10	YOL003C	1.3578	0.000990003	YBR148W	-2.51564	0.0258915	YPL103C	1.06675	6.1632e-08	YPL230W	-1.05381	0.00834845	YIR034C	-1.22832
YAL067C	-2.68831	2.2998e-05	YMR219W	-1.57071	0.0197488	YDR285W	-1.62661	0.0108049	YBR149W	1.02762	0.00318717	YOR266W	1.0352	0.0328597	YER002W	-1.17871	0.00074679	YKR098C	-1.17299	0.000168218	YAR002C-A	1.00402	1.10223e-05	YHR035W	1.01827	0.000489021	YER188W	2.29837	2.5717e-08				YOR238W	1.40242	5.14522e-10	YER138W-A	2.15373	0.00108405	YLR054C	-2.48415	0.0261061	YJL110C	1.07145	6.19478e-08	YBR196C	-1.0652	0.0104789	YJR119C	-1.51862
YFR023W	-2.84173	3.84038e-05	YGL255W	-1.40932	0.0199819	YDR043C	-1.13471	0.0109788	YPR094W	1.04207	0.00343332	YLR162W	2.6895	0.033789	YMR015C	-2.27599	0.000751307	YGR144W	-2.63628	0.000183434	YHR086W-A	2.75307	1.17752e-05	YAR023C	1.50409	0.000510441	YOL033W	1.64321	3.00949e-08				YKR088C	1.14055	6.30697e-10	YOR295W	1.01433	0.00111443	YLR309C	-1.17395	0.0281625	YOL026C	1.78201	6.26839e-08	YLR162W	-1.50978	0.0109848	YLR055C	-1.40432
YBR046C	-1.27253	4.60245e-05	YGL174W	-1.33585	0.0201455	YOL132W	-2.44738	0.0117017	YDL052C	1.06021	0.00355539	YDL206W	1.26243	0.0376347	YIL066C	-2.27947	0.000755822	YFR023W	-3.11508	0.000213763	YEL027W	1.31365	1.215e-05	YOR065W	1.10849	0.00051582	YNR034W	1.45316	3.16438e-08				YNL128W	2.25026	6.57994e-10	YBR144C	2.56866	0.00126195	YIL122W	-1.19586	0.0282729	YDL031W	1.0755	6.33727e-08	YNL018C	-2.48244	0.0187458	YPR015C	-2.5612
YJL144W	-1.36466	6.97599e-05	YOR113W	-1.18259	0.0207589	YPL153C	-1.01475	0.0117229	YNL217W	1.1011	0.00378556	YLR168C	1.14859	0.0406537	YKR094C	-2.43834	0.00080604	YFL062W	-3.74479	0.00022045	YLR043C	1.04692	1.24974e-05	YFR054C	1.5143	0.000627809	YDR139C	1.22866	3.43591e-08				YDR533C	1.4215	8.64719e-10	YOR288C	1.15981	0.00126501	YDR295C	-1.54717	0.0283708	YNL162W-A	1.29383	7.22651e-08	YLL026W	-1.20266	0.0190356	YNL242W	-1.02018
YER084W	-1.87867	8.61881e-05	YMR274C	1.70311	0.0222029	YOR161C-C	1.86396	0.0124293	YGR174C	1.04145	0.00433386	YJR094W-A	-2.5817	4.20856e-32	YDR446W	-5.48567	0.00080604	YIR039C	-1.98641	0.000245191	YPR149W	1.06515	1.2854e-05	YJL051W	1.01642	0.000753585	YGL229C	1.44817	3.55001e-08				YHR005C-A	1.10197	8.68087e-10	YGL057C	1.17374	0.00132236	YOR024W	-2.37496	0.0298423	YOL069W	1.11174	8.27074e-08	YFL014W	-2.474	0.0194072	YBL043W	-3.32165
YBR045C	-1.45448	0.000100005	YLL039C	-1.89843	0.0233993	YJL205C	1.3072	0.0126243	YDL037C	1.04311	0.00437598	YLR344W	-2.30241	6.4693e-31	YBR180W	-6.08391	0.000865903	YNR034W-A	-2.1613	0.000245191	YDL194W	-1.19232	1.45284e-05	YEL028W	1.25092	0.000780843	YNL086W	1.40325	3.95239e-08				YLR118C	1.1608	8.87471e-10	YBL040C	1.08892	0.00134729	YMR101C	-2.51804	0.0298423	YCR060W	1.84268	8.41469e-08	YDR171W	-1.22815	0.0252473	YKL161C	-1.35491
YBR054W	-1.52251	0.000156223	YKL074C	-1.59153	0.0234632	YJR095W	-2.5957	0.0127364	YGL003C	1.07567	0.00630836	YLR237W	-2.76917	1.1554e-27	YBR181C	-2.66605	0.000871496	YPL277C	-1.97996	0.000276508	YDR305C	1.11594	1.57363e-05	YJL103C	1.19866	0.000820508	YGL182C	1.91521	4.69194e-08				YGR108W	1.62676	8.93894e-10	YCR018C-A	3.58785	0.00148588	YHR177W	-1.73114	0.0298967	YBR144C	2.2998	8.5368e-08	YDL139C	-1.13575	0.02555	YDL244W	-3.36181
YIR034C	-1.00201	0.000204743	YLR255C	1.00286	0.0235432	YGL007W	1.5462	0.0138795	YMR286W	1.32402	0.00640637	YOR328W	-4.2063	2.67899e-24	YLR344W	-1.61583	0.000871496	YJL130C	-1.15422	0.000298953	YBR196C-A	2.30642	1.57928e-05	YKR055W	1.05458	0.000822758	YPR030W	1.79798	4.77647e-08				YMR233W	1.40006	9.54745e-10	YNL261W	1.04111	0.00156266	YPR133C	-1.05032	0.0302633	YHR031C	1.09785	8.68931e-08	YLR029C	-1.00965	0.0286279	YDR403W	-2.31098
YKL162C-A	-2.74616	0.00041991	YBR196C-A	1.74868	0.0237377	YDR227W	-1.0604	0.0140792	YJL030W	1.06396	0.00657496	YMR015C	-2.21087	4.65218e-24	YHR174W	-3.26961	0.000907304	YPL223C	-2.12241	0.000377274	YHR209W	-1.21286	1.59409e-05	YMR094W	1.36932	0.000895295	YPR200C	4.36137	5.06378e-08				YNR074C	1.2795	1.12309e-09	YHR005C	1.31032	0.00161949	YMR014W	-1.16797	0.0302672	YLL023C	1.1308	9.31361e-08	YOR027W	-1.01942	0.0287781	YNL065W	-1.74186
YDL021W	-1.10886	0.00041991	YFL056C	-1.58889	0.0237377	YDL139C	-1.24998	0.0142052	YHR043C	1.26893	0.00744531	YGR037C	-2.30873	1.13034e-21	YOL109W	-1.85185	0.000924064	YAL063C	-2.87295	0.000469149	YAL022C	-1.16761	1.81011e-05	YDL199C	1.51034	0.000910596	YDR106W	1.82067	7.09288e-08				YHR022C-A	1.47622	1.21683e-09	YKL109W	1.1821	0.00177562	YOR123C	-1.01162	0.0306378	YMR147W	1.61791	1.04666e-07	YOL109W	-1.04614	0.0304475	YIL101C	-4.08201
YMR244W	-2.83148	0.000787619	YNL097C-B	1.03836	0.0239921	YPL060W	-1.04922	0.0142384	YLR124W	1.72026	0.00753323	YJR025C	-3.47854	1.19696e-20	YFR023W	-3.73603	0.000924064	YER033C	-1.90474	0.00053505	YKL222C	-1.11126	1.81051e-05	YFL041W-A	1.41757	0.00108873	YOL003C	1.12971	1.2134e-07				YBL059W	1.46071	1.3708e-09	YNR059W	1.14572	0.0018232	YCL048W-A	-3.64715	0.0306378	YKL068W-A	1.23716	1.06011e-07	YLR341W	-2.20917	0.0323064	YJR151C	-2.22994
YGR244C	-1.00368	0.000852288	YLR309C	-1.54348	0.0239921	YIL154C	-1.24733	0.0142384	YOR390W	2.02759	0.00758683	YLR023C	-3.5024	4.56721e-19	YOL127W	-2.63369	0.000950957	YEL023C	-1.35829	0.000540001	YBR161W	1.07694	1.91259e-05	YBR296C	6.27566	0.00109307	YPR194C	1.53873	1.31324e-07				YML116W	1.48344	1.91952e-09	YOL159C	1.35211	0.00188439	YMR117C	-1.04891	0.0317685	YGR071C	1.25944	1.06104e-07	YKL071W	-1.72825	0.0328153	YJR109C	-1.38238
YDR216W	-1.28832	0.00112453	YMR255W	-1.85375	0.0239921	YBR296C-A	4.23789	0.014962	YJR094C	1.86564	0.00803475	YHL015W	-1.71803	2.65441e-17	YLL005C	-4.56076	0.000950957	YPR117W	-1.37709	0.000576799	YJR151C	-1.27941	1.93406e-05	YCR023C	1.21011	0.00111161	YNL111C	1.31796	1.3899e-07				YDR305C	1.18163	1.92685e-09	YML046W	1.18891	0.00223212	YIL019W	-1.00044	0.0317685	YOL010W	1.48768	1.06104e-07	YKL031W	-2.03111	0.0465361	YMR206W	-2.66814
YAR070C	-1.74198	0.00126425	YHL015W-A	1.86515	0.0239921	YDR295C	-1.26458	0.0152587	YJL024C	1.03342	0.0092019	YML058W-A	-6.30711	5.0565e-17	YHR141C	-2.52527	0.000975076	YOL132W	-2.63366	0.000590238	YGR243W	-1.839	2.0072e-05	YOL052C-A	2.10595	0.00121239	YGR255C	1.02415	1.50727e-07				YIL014C-A	2.6162	1.97342e-09	YGL142C	1.20666	0.0022608	YER002W	-1.3123	0.0317685	YJL057C	1.0446	1.09094e-07	YGL189C	-1.22853	0.0478517	YKL187C	-1.67371
YNR062C	-1.99167	0.00140093	YPL249C	-1.79403	0.0242774	YPR145C-A	-3.12617	0.015545	YOR150W	1.06905	0.00974562	YNL162W	-1.95756	2.21943e-16	YDR024W	-2.83473	0.000994406	YLL056C	-1.84463	0.000645394	YIR034C	-1.01388	2.02267e-05	YKR046C	1.17781	0.0012523	YIR042C	2.06761	1.79127e-07				YBR144C	1.98576	2.36844e-09	YJR055W	1.33796	0.00228828	YMR251W	-1.32056	0.0317685	YOL013W-B	2.28705	1.19197e-07				YDR534C	-1.51643
YNL034W	-3.37494	0.00146863	YGR110W	-2.74201	0.0250933	YGL204C	1.42894	0.0161545	YGR247W	1.15051	0.0105251	YHL012W	-4.53488	3.94841e-16	YBR019C	-2.56162	0.00103181	YOL164W-A	-4.95032	0.000680731	YKL103C	-1.84805	2.14953e-05	YER188W	2.33537	0.00126622	YOR367W	1.23755	2.09965e-07				YGR058W	1.1957	2.61919e-09	YJR021C	1.04771	0.00257879	YFR023W	-2.81373	0.0325497	YMR177W	1.02137	1.21547e-07				YAL067C	-2.88417
YHL012W	-1.48275	0.00188649	YNL224C	-1.31981	0.0252454	YOR314W-A	2.34263	0.0165929	YCR095W-A	2.13143	0.0127922	YDR285W	-4.26227	5.84215e-16	YFR015C	-1.88157	0.00109619	YIL101C	-1.19206	0.000693303	YKL069W	1.19163	2.14953e-05	YDL110C	1.14475	0.00129324	YPR094W	1.23378	2.18527e-07				YNL122C	1.18122	3.09426e-09	YKL058W	1.08836	0.00268156	YOL066C	-1.11556	0.0332972	YHR022C-A	1.74082	1.30914e-07				YPL230W	-2.48915
YKL093W	-1.50959	0.00310059	YGL244W	-1.03474	0.0252454	YOR348C	1.14446	0.0176329	YBR196C-A	2.14904	0.0150091	YHR072W-A	-1.18461	1.78782e-15	YDL081C	-2.89699	0.00110029	YPL054W	-2.81282	0.000709207	YLR307W	-3.01589	2.14965e-05	YER188C-A	4.45693	0.00134769	YGL033W	2.83199	2.21044e-07				YGL057C	1.17616	3.43682e-09	YML050W	1.1975	0.00317276	YCL001W-B	-3.19443	0.0335436	YER127W	1.31008	1.37814e-07				YBR105C	-2.32778
YOL047C	-2.05055	0.00343456	YOR008C-A	2.02026	0.0252454	YEL023C	-1.1074	0.0185025	YOL065C	1.08844	0.0155448	YMR057C	-4.24023	3.95972e-14	YNL162W	-2.1739	0.00112586	YNL336W	-2.31693	0.000735005	YPL141C	-1.28886	2.54296e-05	YOR348C	1.56731	0.00138485	YKL162C	1.90211	2.24495e-07				YLR411W	2.48786	3.5418e-09	YDL227C	2.28724	0.00388354	YKR015C	-3.39049	0.0368618	YNR046W	1.66059	1.47942e-07				YOR192C	-1.72237
YGL262W	-4.00429	0.0039925	YOR128C	-1.1066	0.0252476	YBR182C-A	1.69569	0.0199123	YMR222C	1.18703	0.0182447	YCR018C	-1.62345	4.77791e-14	YNR044W	-1.26157	0.00113358	YMR101C	-3.3771	0.000801789	YDL192W	1.051	2.80754e-05	YLR162W	2.01096	0.001389	YDL227C	1.06965	2.92284e-07				YGL098W	1.58451	4.53827e-09	YKL069W	1.45206	0.00393747	YOL152W	-1.58512	0.0368618	YIL029C	1.58844	1.49773e-07				YIL163C	-1.94962
YBR296C	-3.70277	0.00407462	YMR213W	-1.12573	0.0254126	YDR486C	-1.09218	0.0199123	YNL086W	1.02836	0.0205276	YJL089W	-5.49148	5.11481e-13	YGL027C	-1.00343	0.00113358	YCR102C	-1.8051	0.000853807	YNL010W	1.03288	2.81705e-05	YBR296C-A	7.52472	0.00156693	YNR059W	1.11901	3.09089e-07				YPR155C	1.01858	7.20796e-09	YBR182C-A	2.07156	0.00426775	YBR147W	-1.63781	0.0412776	YLR243W	1.03443	1.69049e-07				YJR155W	-1.29043
YPL209C	-1.11104	0.00475812	YIL098C	-1.42133	0.0267757	YLR178C	-1.04986	0.0213979	YOL135C	1.1008	0.0214161	YNL251C	-1.09836	2.15128e-12	YMR319C	-1.10877	0.00113358	YHL012W	-3.40305	0.00089807	YLR403W	-1.09413	2.93084e-05	YKL121W	1.13021	0.00165443	YKL189W	1.17093	3.09089e-07				YDR424C	1.1106	8.24482e-09	YNL122C	1.18188	0.00545712	YLR346C	-1.29403	0.041343	YDL215C	1.15517	1.70105e-07				YIL119C	-1.22684
YBR147W	-1.58719	0.00499254	YNL237W	-2.78972	0.0268048	YLR055C	-1.00169	0.0219057	YCR043C	1.12931	0.0219118	YOL015W	-3.17634	5.81464e-12	YDR385W	-3.03084	0.00116908	YHL044W	-1.66498	0.000917067	YHR140W	1.80988	2.97132e-05	YPL111W	1.0117	0.00168681	YKL062W	1.42196	3.11793e-07				YFL027C	1.22446	8.44979e-09	YLR455W	1.29257	0.00645925	YGL029W	-1.53585	0.0422949	YPR010C-A	1.51552	1.80015e-07				YGL255W	-1.61696
YJR155W	-1.09987	0.0050955	YLR108C	1.46768	0.027881	YDL037C	1.07842	0.0263623	YJR067C	1.07987	0.0220418	YJL153C	-4.93554	1.12789e-11	YMR239C	-1.04143	0.001319	YPR006C	-1.77834	0.000917067	YER103W	-1.89766	3.00872e-05	YDL183C	1.2513	0.00171755	YNL128W	2.44082	3.63449e-07				YLR397C	1.06612	8.55543e-09	YGR286C	1.22509	0.00665572	YOR206W	-1.02904	0.0425332	YOR288C	1.02385	1.86197e-07				YHR080C	-1.32134
YGL259W	-2.08521	0.00513529	YKL042W	-1.46032	0.0280082	YER111C	-1.4711	0.0266589	YPL279C	2.81131	0.0253731	YNR064C	-5.01833	2.31257e-11	YGL029W	-1.33054	0.00143796	YGR087C	-2.8061	0.000946084	YOL155C	-1.51762	3.01168e-05	YAL028W	1.27986	0.00201485	YCL021W-A	1.483	3.67392e-07				YKR095W-A	1.52537	9.42461e-09	YGL090W	1.18644	0.00685322	YOL013W-B	1.24532	0.0429908	YIL162W	1.00626	1.99788e-07				YPL177C	-1.40763
YMR321C	-4.79234	0.00523486	YNL157W	-1.28393	0.02867	YDR059C	1.18237	0.026815	YGL182C	1.45624	0.0309048	YGL030W	-1.26848	4.43275e-11	YOR182C	-2.07955	0.00143796	YKR015C	-2.71405	0.00101122	YDR286C	1.15876	3.04186e-05	YML042W	1.04236	0.0020684	YDL210W	2.30462	3.93829e-07				YDR281C	2.56066	1.0245e-08	YIL054W	2.32762	0.00733576	YLR445W	-2.93855	0.0443264	YKL014C	1.10403	2.13843e-07				YLR307W	-2.16233
YOR384W	-1.36725	0.00531722	YHR090C	-1.05542	0.02874	YPR194C	1.43346	0.0278308	YDL181W	1.07199	0.0317197	YGL156W	-3.15641	6.3144e-11	YGR037C	-1.58647	0.00148174	YCR098C	-1.65127	0.00108999	YKL096W	1.30535	3.14336e-05	YGL258W	2.07311	0.00207117	YNR004W	1.88333	4.25001e-07				YHR097C	1.30608	1.0745e-08	YOL025W	1.36433	0.0078358	YER058W	-1.21677	0.044798	YEL019C	1.64845	2.38312e-07				YJL037W	-2.49738
YJL037W	-1.80333	0.00651974	YPR161C	-1.49733	0.0298806	YKR009C	1.04884	0.0278308	YGR246C	1.06908	0.0325506	YHL024W	-3.25716	7.47987e-11	YBR062C	-1.52585	0.00156779	YFL053W	-1.95905	0.00108999	YMR192W	-1.00685	3.24125e-05	YCR102C	2.48172	0.00213072	YIL119C	1.23816	4.536e-07				YGR067C	1.86429	1.31018e-08	YJL205C	1.66882	0.00878835	YMR128W	-1.27687	0.044798	YGL036W	1.04013	2.53098e-07				YOR032C	-2.44852
YGL184C	-1.31746	0.00727687	YDL110C	-1.39499	0.02993	YMR122C	1.5392	0.0287464	YJR055W	1.12367	0.0337915	YBR084C-A	-1.68852	8.23977e-11	YBL027W	-2.40213	0.00162376	YDL210W	-1.46822	0.00112041	YJL199C	1.32741	3.38399e-05	YPR030W	1.46664	0.00217774	YEL005C	1.61397	4.80831e-07				YHR035W	1.30213	1.39012e-08	YLR003C	1.19748	0.00932865	YOR008C-A	1.53	0.0456384	YJR094C	1.22938	2.76726e-07				YBR020W	-1.16735
YIR039C	-1.44576	0.00816595	YCR024C	1.34225	0.0300092	YKR020W	-1.03477	0.0293112	YDL047W	1.08696	0.0343063	YDR374C	-5.90219	1.39062e-10	YER128W	-1.39957	0.00162376	YBR072W	-2.12128	0.00116642	YAL067C	-2.84357	3.53727e-05	YHR214W-A	6.86403	0.0021987	YNL122C	1.02867	5.20148e-07				YDR541C	1.21855	1.57251e-08	YLR363W-A	1.12986	0.00972338	YIL102C	-4.82655	0.0456384	YGL032C	1.27683	2.92553e-07				YGR248W	-2.87562
YER175W-A	-1.23951	0.0085767	YMR190C	-1.21443	0.0300275	YBR144C	1.21233	0.0293964	YIL054W	2.26416	0.0375052	YGR085C	-2.01594	1.90392e-10	YLR249W	-2.53196	0.00162376	YGR161C	-1.9154	0.00117238	YER011W	1.62541	3.64663e-05	YJR119C	1.26842	0.00228515	YIR030C	2.34637	5.4027e-07				YER046W	1.40883	1.59261e-08	YEL004W	1.30293	0.0101875	YLR080W	-1.3615	0.0480194	YPR186C	1.25177	3.30833e-07				YBR240C	-1.74038
YLL005C	-2.55127	0.00891052	YLR346C	-2.32993	0.0305041	YMR158C-A	-1.71488	0.0353892	YBR292C	1.63774	0.0421252	YMR303C	-2.66798	1.90894e-10	YPL160W	-2.22314	0.00162376	YKL050C	-1.40072	0.0012285	YDR454C	1.01559	3.64663e-05	YDR102C	1.60964	0.0023462	YOR288C	1.14442	5.91374e-07				YOR130C	1.35425	1.76196e-08	YLR364W	1.03388	0.0103973	YNR068C	-1.45828	0.048279	YPL086C	1.35537	3.72592e-07				YPL171C	-2.12362
YOL160W	-2.82449	0.0109054	YCR005C	-1.81281	0.0311118	YDL210W	1.25289	0.0353899	YBR182C-A	1.47728	0.0441205	YOR371C	-1.33108	5.04882e-10	YMR101C	-3.53866	0.00169708	YNR001C	-2.18238	0.00125853	YGR161C	-1.66173	3.64663e-05	YER053C-A	1.95657	0.00236836	YCL049C	1.43633	6.12691e-07				YDR106W	1.49089	1.79852e-08	YBR210W	1.09126	0.0104099				YBR061C	1.22883	3.91175e-07				YIL055C	-1.58899
YFL014W	-1.78732	0.0109542	YEL004W	1.30809	0.0315558	YBR152W	-1.03183	0.0362748	YBL078C	1.02717	0.0472983	YKL056C	-1.88051	5.29079e-10	YLR185W	-2.3871	0.001722	YKR102W	-1.05473	0.00130629	YEL048C	1.56187	3.66346e-05	YBR208C	1.04525	0.00249606	YDR102C	2.09858	6.16142e-07				YBR013C	1.95722	1.9847e-08	YCR095W-A	2.33073	0.0104162				YLR222C	1.15032	4.24537e-07				YJL079C	-2.36129
YFL054C	-1.0249	0.0112254	YPL230W	-2.18905	0.0333893	YBR147W	-1.73357	0.0363116	YBR186W	-6.39622	3.81386e-29	YNL178W	-1.94113	7.48464e-10	YPL090C	-2.25883	0.001722	YFL020C	-3.02433	0.00166475	YDR222W	1.14451	3.66545e-05	YOL024W	2.55909	0.00251498	YOR092W	1.03512	6.28573e-07				YCR007C	1.40043	2.00113e-08	YMR266W	1.08815	0.01073				YGR123C	1.0867	4.42258e-07				YLR341W	-2.48934
YIR030C	-1.05888	0.012308	YMR250W	-1.73662	0.0336971	YKR106W	1.65092	0.0368186	YJR025C	-3.08762	4.73753e-24	YBR118W	-4.62219	8.23727e-10	YGL249W	-1.92729	0.001722	YDL138W	-1.26166	0.00169693	YOR177C	-3.25601	3.72339e-05	YGR201C	1.13682	0.0026009	YDR424C	1.25762	7.66324e-07				YLR038C	1.01357	2.02933e-08	YPR191W	1.09	0.0110055				YNL286W	1.08355	4.74031e-07				YIR039C	-2.63683
YDL239C	-1.12158	0.0126085	YOL066C	-1.07737	0.0336971	YLL017W	-1.42734	0.0377765	YHL012W	-4.77337	1.11195e-22	YOR177C	-5.10874	8.30358e-10	YDR217C	-1.08745	0.0017496	YNR070W	-1.61426	0.00174121	YKR020W	-1.48089	3.837e-05	YNL160W	1.48832	0.00274963	YMR150C	1.16836	7.72129e-07				YBL025W	1.0217	3.39709e-08	YBL089W	1.00603	0.0110055				YJL024C	1.00553	4.87687e-07				YNL239W	-1.56691
YKR097W	-1.1388	0.0157366	YKL103C	-2.25968	0.0336971	YKR097W	1.25217	0.0384486	YNL279W	-3.15541	8.30514e-22	YKR076W	-3.17397	8.30358e-10	YPL079W	-2.03406	0.00179026	YJR095W	-2.79351	0.00190169	YNR034W-A	-2.9665	4.00827e-05	YLL059C	1.10462	0.00305066	YNL036W	1.04316	8.77649e-07				YBR014C	1.12626	3.84395e-08	YKR088C	1.1117	0.013385				YJR021C	1.22616	4.91074e-07				YER066W	-1.58373
YOL154W	-1.01017	0.0159913	YLR177W	-1.55439	0.0341501	YIL149C	-1.01011	0.0387805	YFR015C	-3.03207	5.42273e-21	YBL072C	-4.16359	8.54139e-10	YER056C-A	-2.20791	0.00185735	YOR177C	-2.55034	0.00193882	YFR023W	-3.51764	4.33596e-05	YFL003C	1.53661	0.00328362	YGR201C	1.19975	8.90621e-07				YHR143W	1.00513	3.84395e-08	YOR107W	1.29884	0.013981				YLR124W	2.2675	5.26576e-07				YMR105C	-2.62644
YPR007C	-1.95404	0.0175892	YOR178C	-3.40055	0.0354729	YDL206W	1.08048	0.0393198	YJR094W-A	-2.18484	6.69719e-19	YLR388W	-3.34157	1.34614e-09	YAL067C	-3.51754	0.00192773	YGR287C	-1.27776	0.00195365	YAL061W	1.24087	4.37821e-05	YFL033C	1.14815	0.0034143	YIR001C	1.21419	9.60253e-07				YLR306W	1.18282	4.04389e-08	YLR084C	1.06109	0.0140955				YIL089W	1.38383	5.43395e-07				YGR060W	-2.36911
YDR403W	-1.29577	0.018477	YMR188C	-1.38546	0.0354729	YAR071W	-2.31962	0.0407354	YJL153C	-4.17874	3.56865e-18	YOR052C	-1.18849	1.42628e-09	YHR127W	-1.22195	0.00215221	YOL047C	-2.12331	0.0019641	YJL191W	1.00195	4.50669e-05	YOL084W	1.80044	0.00363781	YAR053W	2.64654	9.66422e-07				YCL064C	1.36839	4.06087e-08	YAR033W	1.28568	0.0146332				YJR108W	1.50284	5.82412e-07				YFL066C	-7.79286
YDR281C	-2.19186	0.0193951	YPR018W	-1.42673	0.0361819	YNL195C	1.73739	0.0408823	YLR344W	-1.6075	5.52102e-18	YGL188C-A	-1.38521	1.88695e-09	YLR081W	-5.00852	0.00237104	YEL041W	-1.72276	0.00199386	YOL164W-A	-4.77103	4.75002e-05	YMR170C	1.21786	0.00376324	YDL048C	1.50841	1.02078e-06				YPL257W	1.58682	4.45095e-08	YDR185C	1.09108	0.0148205				YGL254W	1.05641	6.19642e-07				YNL128W	-1.64739
YGR087C	-1.77345	0.0201232	YIL136W	-1.17	0.0372614	YNL097C-B	1.03449	0.0433982	YHR015W	-4.00352	6.47238e-17	YER117W	-1.91732	2.54938e-09	YLR134W	-1.61594	0.0024269	YMR315W-A	-2.78605	0.00205076	YGR201C	1.58462	5.7045e-05	YJR161C	2.80815	0.00395331	YHL015W-A	2.85521	1.16511e-06				YDL241W	2.04394	5.20359e-08	YBL029C-A	1.04707	0.0152433				YMR003W	1.26493	6.38542e-07				YJL133C-A	-1.40674
YBR148W	-1.72741	0.021953	YJR154W	-1.03663	0.0378995	YKL042W	-1.02658	0.0438825	YIL099W	-5.78108	1.34742e-16	YAL018C	-6.39254	2.61668e-09	YBR240C	-1.55289	0.0024269	YML054C-A	-4.8147	0.0020841	YNL234W	1.99939	5.90519e-05	YKR019C	1.05218	0.00431262	YNL331C	1.36729	1.17231e-06				YIL134C-A	1.69943	5.54364e-08	YOL088C	1.32114	0.0158628				YPR116W	1.04671	6.62733e-07				YJL106W	-1.24141
YKL071W	-1.71343	0.0232475	YJL153C	-2.36561	0.0384952	YMR206W	-1.56514	0.0448241	YAL018C	-6.81401	3.48807e-16	YHR141C	-2.55821	3.28408e-09	YKL054C	-1.00919	0.00258226	YDL214C	-1.33963	0.0021216	YIL098C	-1.38951	6.05591e-05	YGL159W	1.07747	0.00476454	YPL140C	1.25551	1.17231e-06				YHR124W	2.01593	6.19487e-08	YCL005W	1.06861	0.0181801				YMR269W	1.3606	6.73165e-07				YBL108W	-6.29775
YOL132W	-1.89022	0.0273522	YJL133C-A	-2.6591	0.0384952	YOR190W	-1.32393	0.0465698	YFL011W	-4.9166	5.59442e-16	YOL104C	-2.07886	3.5575e-09	YMR147W	-3.82534	0.00272075	YDR216W	-1.9962	0.00221799	YPL054W	-2.54152	6.10994e-05	YOR152C	1.20222	0.00494071	YEL073C	3.33309	1.21064e-06				YLR099W-A	1.15381	6.40407e-08	YIL029C	1.09088	0.020776				YML015C	1.14202	7.05151e-07				YPR145C-A	-2.37702
YNL335W	-2.54419	0.0298631	YAL028W	-1.77279	0.0393042	YBR031W	1.04203	0.0473029	YNR062C	-5.46104	6.49984e-15	YGL189C	-3.44562	3.65346e-09	YBR048W	-2.10695	0.00280924	YPL189W	-1.76612	0.00221799	YOL002C	1.00684	6.11762e-05	YML027W	1.1393	0.00496568	YGL185C	1.28301	1.25482e-06				YHR005C	1.02661	6.46489e-08	YMR065W	1.24529	0.0232042				YHR066W	1.09069	7.33182e-07				YLR081W	-1.78326
YNR068C	-1.36007	0.0315445	YGL250W	-1.83618	0.0410599	YJL037W	2.02988	0.0490272	YLR237W	-1.95889	1.64173e-14	YOL127W	-2.74314	4.14956e-09	YHR021C	-1.89926	0.00280924	YLL060C	-1.08904	0.00254791	YMR202W	1.36172	6.11762e-05	YNR014W	1.44113	0.00499137	YIL132C	1.33608	1.30838e-06				YNR016C	1.25229	9.28473e-08	YGL204C	1.00052	0.0257148				YOL027C	1.03246	7.72073e-07				YBR209W	-2.33209
YOR032C	-1.29067	0.0328197	YOR036W	-1.58486	0.0410599	YOR177C	-2.03244	0.0491192	YHL024W	-3.34966	9.04427e-14	YJR145C	-2.52222	4.14956e-09	YGL251C	-1.21452	0.00280924	YMR280C	-1.72786	0.00261964	YMR198W	-1.32054	6.17165e-05	YJL205C	1.28665	0.00523889	YGR126W	1.16207	1.70782e-06				YDR286C	1.47252	9.78523e-08	YDR170W-A	1.24823	0.0287131				YJR063W	1.24499	9.78431e-07				YOL154W	-1.35411
YGR224W	-1.41494	0.0362747	YEL012W	-2.40432	0.0427465	YOR236W	-1.24318	0.049921	YIR027C	-4.80867	2.2974e-13	YFL014W	-5.36936	4.14956e-09	YKR105C	-6.61616	0.00280924	YMR182W-A	-1.65725	0.00299864	YIL057C	-4.01344	6.27625e-05	YGL121C	1.38782	0.00525917	YHR214C-E	2.36467	1.74251e-06				YAR033W	1.41866	1.16845e-07	YOL092W	1.01125	0.03273				YPL146C	1.0662	9.86095e-07				YMR122C	-1.9432
YHR015W	-1.09107	0.0451622	YGL159W	1.49077	0.0433517				YPR027C	-5.83141	4.16813e-13	YNR044W	-1.2157	4.14956e-09	YBL087C	-2.25661	0.00287646	YFL014W	-2.37752	0.00301244	YDR074W	-1.11301	6.37454e-05	YDL037C	1.51317	0.00527891	YBR072C-A	2.34477	1.99108e-06				YER011W	3.73876	1.30962e-07	YMR286W	1.23358	0.0348792				YLR172C	1.07178	1.04512e-06				YEL011W	-2.23595
			YOL116W	-1.09133	0.0433517				YPL037C	-1.71571	5.46819e-13	YDR064W	-1.51054	5.1935e-09	YBR294W	-4.48391	0.00288305	YDR374C	-2.94475	0.00303961	YOR227W	1.12918	6.52805e-05	YGL250W	1.01388	0.00542567	YPR010C-A	1.54433	2.00559e-06				YAL046C	1.4285	1.33803e-07	YPL257W	1.3034	0.0388361				YDL209C	1.30336	1.20351e-06				YEL012W	-1.10732
			YFR017C	-2.29626	0.0433517				YNL178W	-1.54673	7.05931e-13	YDL055C	-1.59448	5.24397e-09	YHR039C-A	-1.94219	0.00288305	YER045C	-1.04589	0.00307967	YDR258C	-1.89492	6.62536e-05	YJR025C	1.63518	0.00560478	YOR268C	2.27306	2.09386e-06				YDR033W	1.09912	1.61028e-07	YJR093C	1.03976	0.0407552				YDR121W	1.22159	1.56459e-06				YKL093W	-2.07205
			YJR094C	1.06439	0.0440293				YMR015C	-1.57263	2.11834e-12	YLR109W	-2.67174	5.37137e-09	YLR044C	-2.60577	0.00297041	YLR179C	-1.10121	0.00335941	YER129W	-1.09418	6.65543e-05	YMR151W	1.23642	0.00573058	YNL097C-B	1.76689	2.41225e-06				YMR320W	2.38721	1.81833e-07	YHR208W	1.16142	0.0415896				YAR028W	1.09012	1.59764e-06				YFR017C	-2.85051
			YKL045W	-1.07396	0.0444878				YEL073C	-3.52576	2.23814e-12	YBL071C-B	-4.57031	5.82228e-09	YPL147W	-1.86276	0.00297041	YNL040W	-1.09872	0.00336633	YEL011W	-1.45405	7.28882e-05	YDL223C	1.31589	0.00608731	YPR195C	1.46253	3.29458e-06				YLR263W	1.30307	1.88451e-07	YJL030W	1.11249	0.0427201				YMR163C	1.10767	1.598e-06				YGR052W	-2.06238
			YOL052C-A	-3.11551	0.0455313				YLR341W	-5.64878	2.23814e-12	YHR177W	-3.42201	6.01336e-09	YER091C	-2.29097	0.00299824	YDL248W	-1.93179	0.00370511	YDL243C	-1.27506	7.90155e-05	YHR180W	1.89293	0.00611698	YPR006C	1.50636	3.4038e-06				YIL053W	1.06265	2.07899e-07	YOR238W	1.08548	0.0451557				YKL144C	1.08832	2.07746e-06				YNL338W	-6.2336
			YGL061C	-1.26683	0.0455313				YBR196C	-1.37445	3.38715e-12	YNL196C	-5.77894	6.09066e-09	YLR441C	-2.13185	0.00299824	YER066W	-1.34709	0.0037388	YBR055C	-1.0192	8.10331e-05	YIL073C	1.72197	0.00625519	YLR364W	1.31051	3.51048e-06				YLL028W	1.26656	2.12441e-07	YJR025C	1.35192	0.0467501				YOL159C-A	1.03697	2.43259e-06				YBR147W	-2.2964
			YGR271C-A	-1.11126	0.0461695				YKL086W	-3.46188	3.4624e-12	YER003C	-1.40893	6.2039e-09	YDL239C	-2.23708	0.00303364	YKL161C	-1.14721	0.0040003	YNL261W	1.06821	8.48448e-05	YDR246W-A	1.18463	0.00695843	YBR085W	1.47754	3.5198e-06				YKL008C	1.0179	2.14723e-07	YBR072W	-5.705	3.57124e-63				YDR106W	1.36828	2.56126e-06				YHR161C	-1.21257
			YLR025W	-1.5161	0.0469207				YIL101C	-2.82593	6.30613e-12	YDR225W	-1.19758	6.28931e-09	YMR143W	-1.95624	0.00317262	YJL105W	-1.93984	0.00400176	YKL148C	-1.69064	8.90053e-05	YIL101C	1.1906	0.00703098	YBR014C	1.22457	3.71482e-06				YER128W	1.67315	2.39889e-07	YJL052W	-4.86335	3.1288e-53				YOR036W	1.12229	2.66167e-06				YFL050C	-1.15294
			YJR161C	1.60251	0.047972				YFL014W	-5.88216	7.30523e-12	YOR096W	-1.6966	6.46094e-09	YPL220W	-2.60545	0.00327979	YPL272C	-1.00678	0.00433234	YPL249C	-1.49763	9.84769e-05	YAR070C	2.40068	0.00739691	YMR256C	1.20916	4.35833e-06				YBR145W	1.72756	2.77332e-07	YGL156W	-4.41143	3.1288e-53				YIL079C	1.0201	2.73575e-06				YOL157C	-1.58954
			YCR015C	1.32852	0.0489661				YKL056C	-1.65696	8.47015e-12	YBR180W	-5.37911	6.99871e-09	YGL135W	-2.64725	0.00329474	YNL333W	-2.30026	0.00441619	YKL045W	-1.02072	0.000104987	YNR074C	1.11194	0.00845859	YGR286C	1.15159	4.44025e-06				YDR523C	2.44634	3.05581e-07	YOR382W	-5.64089	1.43839e-50				YLR006C	1.00546	2.76392e-06				YJR156C	-2.92143
			YNL015W	-1.79587	0.0489661				YLR081W	-5.41259	1.0099e-11	YGR192C	-3.64829	6.99871e-09	YMR062C	-1.40162	0.00339874	YEL049W	-3.37337	0.0049353	YLR309C	-1.45473	0.000106809	YOR314W-A	3.13346	0.00908567	YPL062W	1.63673	4.77486e-06				YNL279W	1.39805	3.83415e-07	YML058W-A	-7.51625	2.02887e-50				YCR085W	1.90007	2.91372e-06				YOL155C	-2.29397
			YLL009C	-1.02305	0.0495799				YER187W	-5.02072	1.0321e-11	YBR196C	-1.20682	7.64339e-09	YNL145W	-2.55327	0.00346161	YBR250W	-1.69197	0.00526108	YIL073C	-2.007	0.000107082	YPR015C	1.73992	0.00920047	YBR054W	1.87673	5.26333e-06				YLR265C	1.05804	3.84042e-07	YLR304C	-2.73988	7.06731e-48				YPR182W	1.18959	3.0309e-06				YPL277C	-1.91824
			YOR353C	-1.0463	0.0496356				YIL037C	-4.76734	1.11333e-11	YOR020C	-1.07232	9.68192e-09	YOR027W	-1.38816	0.00346789	YDR539W	-1.4902	0.00534211	YHR071W	-1.19177	0.000114578	YCR024C	1.42682	0.00926821	YFR007W	1.49473	5.29436e-06				YOL159C	1.25274	5.24491e-07	YNL208W	-2.73603	5.65404e-34				YOR160W	1.01237	3.60001e-06				YGL125W	-2.11268
			YDR534C	-2.08785	0.0496356				YDR225W	-1.18583	3.04247e-11	YDR086C	-1.19529	1.43838e-08	YER074W	-2.11716	0.00353183	YPR001W	-2.16228	0.00534211	YPL279C	1.23829	0.000118828	YIR019C	1.09224	0.00938222	YOR249C	1.12962	7.28792e-06				YOL064C	1.05982	6.41952e-07	YIL101C	-4.40788	9.13927e-31				YPR046W	1.40672	4.37428e-06				YPR007C	-2.31025
									YDR259C	-3.53992	5.8671e-11	YMR242C	-2.70807	1.4692e-08	YLR333C	-1.73888	0.00358595	YLR267W	-2.02011	0.00565084	YIL169C	-2.55421	0.000128994	YGL007W	1.99275	0.00947099	YJR108W	1.22422	7.49066e-06				YOR266W	1.1953	8.06706e-07	YFL014W	-7.20339	3.64923e-29				YPR191W	1.17951	4.58518e-06				YGR009C	-1.05203
									YDL214C	-4.00133	6.41053e-11	YOR182C	-2.45694	1.57649e-08	YGR092W	-1.2558	0.00358595	YPL248C	-1.50181	0.00582749	YIL049W	1.01459	0.000129757	YMR122C	1.86877	0.0102206	YNR014W	1.48962	7.64864e-06				YLR112W	1.01429	9.87765e-07	YJR150C	-7.58014	3.72217e-28				YBL025W	1.08384	4.96536e-06				YML100W	-2.442
									YKR015C	-6.13515	1.96935e-10	YER056C-A	-2.18531	1.70618e-08	YDL083C	-2.247	0.00358595	YDR170W-A	-1.85724	0.00582749	YDR391C	-1.23421	0.000147806	YBL109W	4.40496	0.0109085	YLR038C	1.11151	9.24189e-06				YGR039W	1.21102	1.01735e-06	YMR102C	-3.01126	2.44064e-27				YLL008W	1.01227	5.17285e-06				YMR190C	-1.00223
									YBR084C-A	-1.56935	2.05258e-10	YMR251W	-3.65166	2.99698e-08	YMR170C	-1.36682	0.00375518	YFR054C	-1.50483	0.00582749	YHR005C	-1.00231	0.000154439	YDL210W	1.43183	0.0114717	YPL092W	1.07776	9.37691e-06				YPL076W	1.24305	1.17977e-06	YHL021C	-2.64256	2.37844e-26				YJR116W	1.29448	5.9285e-06				YBR250W	-1.90291
									YOR052C	-1.18521	2.0613e-10	YDR471W	-2.33512	4.01126e-08	YOR312C	-1.82939	0.00375518	YOL119C	-1.18662	0.00598639	YEL024W	-1.10624	0.000164418	YHR213W-B	4.1422	0.0121136	YJR054W	1.20391	1.03253e-05				YIL119C	1.57299	1.21988e-06	YER062C	-3.03289	1.6206e-23				YNL234W	1.43641	6.42536e-06				YIL057C	-2.46079
									YBL098W	-2.14547	2.12689e-10	YBR082C	-1.1363	4.21251e-08	YLR109W	-1.92078	0.00375518	YFR026C	-2.04347	0.00599297	YPL234C	1.26452	0.000173989	YNL277W-A	1.40091	0.0126355	YIR005W	1.47974	1.15857e-05				YER093C-A	1.28849	1.2487e-06	YOR153W	-3.17484	2.92759e-23				YER099C	1.19886	7.28348e-06				YLR012C	-6.1566
									YMR057C	-3.99712	2.12689e-10	YER187W	-4.82153	4.24238e-08	YLR307W	-3.21979	0.00375518	YEL011W	-1.44572	0.00606073	YLR168C	-1.31321	0.000180212	YPL257W	1.17689	0.0126738	YKL065W-A	2.07758	1.15857e-05				YPL140C	1.11717	1.37008e-06	YKR039W	-2.62515	5.1968e-23				YJR025C	1.45729	7.60674e-06				YLL058W	-1.63038
									YER033C	-2.75019	2.49058e-10	YGR027C	-1.74162	4.24238e-08	YBR082C	-1.21958	0.00384141	YAR047C	-2.20731	0.0066746	YIR005W	-1.25759	0.000197258	YER185W	1.41658	0.0138047	YNL145W	1.288	1.17426e-05				YCR060W	1.23264	1.61376e-06	YOR384W	-5.44876	7.65192e-23				YIL152W	1.10806	7.64761e-06				YOR011W	-1.72446
									YNR064C	-4.73594	2.96015e-10	YLR441C	-1.76844	4.35224e-08	YOL120C	-2.25673	0.00390079	YDR034W-B	-2.29639	0.00764978	YMR227C	-1.50241	0.000204306	YIL042C	1.10012	0.0138264	YOR137C	1.03273	1.21382e-05				YPL279C	1.81434	1.64974e-06	YLR346C	-4.79697	1.34802e-21				YGR271C-A	1.25585	7.77388e-06				YDL194W	-1.10433
									YPR007C	-5.48181	3.35643e-10	YPR132W	-2.3802	4.65667e-08	YGR027C	-2.01661	0.00390079	YJL218W	-2.25188	0.00802954	YML052W	1.1778	0.000204306	YDL154W	1.29605	0.0138782	YIR029W	1.38845	1.2268e-05				YGR096W	1.05783	2.00811e-06	YMR251W	-4.53092	6.29948e-21				YHR085W	1.02679	9.29997e-06				YDR259C	-1.42708
									YNL224C	-1.66271	3.59522e-10	YLR167W	-1.73298	5.82608e-08	YMR230W	-1.88058	0.00401675	YOR389W	-1.771	0.00850088	YHR001W-A	-1.08288	0.000229026	YBR294W	5.64194	0.0152696	YDR131C	1.4769	1.31967e-05				YOR050C	2.01489	2.01811e-06	YBR105C	-3.04029	1.72422e-19				YDR449C	1.2987	9.67438e-06				YKR050W	-1.33719
									YJL200C	-1.08704	6.41421e-10	YBR018C	-3.44746	6.46082e-08	YHR010W	-1.82926	0.00404585	YFR015C	-1.54219	0.00859764	YKL062W	-1.06361	0.000229764	YAL064W-B	1.5533	0.0162378	YHR044C	1.41727	1.33189e-05				YDL216C	1.31762	2.18735e-06	YKL103C	-2.75318	2.13202e-19				YNL036W	1.05312	1.1821e-05				YPL061W	-2.69514
									YER103W	-2.29955	6.53768e-10	YDL184C	-3.0454	8.9726e-08	YER054C	-2.50032	0.00409689	YJR154W	-1.25255	0.0086138	YPR133C	-1.17608	0.000240481	YDR018C	1.83778	0.0165532	YCR060W	1.42133	1.4492e-05				YJR136C	1.04722	2.50752e-06	YOR230W	-1.52581	2.18979e-19				YBR145W	1.21015	1.23125e-05				YKR098C	-1.81655
									YDR403W	-4.04072	8.11078e-10	YML073C	-2.83717	1.09903e-07	YDR259C	-2.05449	0.00422584	YLR013W	-5.30855	0.00879775	YOR065W	-1.25966	0.000242011	YGR144W	2.33798	0.0169247	YMR065W	1.26056	1.48231e-05				YPR010C-A	1.2558	2.74864e-06	YOL155C	-5.68653	3.13074e-18				YLR255C	1.08887	1.24172e-05				YDL079C	-1.94175
									YDR218C	-5.31077	8.30521e-10	YOR294W	-1.24546	1.09903e-07	YKR007W	-1.78756	0.00435069	YNL018C	-2.46995	0.00926621	YDL130W-A	-1.94341	0.00025995	YMR254C	2.11228	0.0185833	YER028C	1.70589	1.49789e-05				YCR085W	1.0352	2.92894e-06	YNL237W	-4.08066	5.90928e-17				YAR023C	1.20975	1.80444e-05				YKR102W	-1.29581
									YER106W	-6.90117	1.2649e-09	YLR249W	-2.14023	1.1305e-07	YJL190C	-2.20987	0.00437344	YOL160W	-3.8983	0.00968092	YGL034C	-2.46674	0.00025995	YGR067C	1.11691	0.0207881	YNL133C	1.31236	1.81147e-05				YOR003W	1.3093	3.17052e-06	YOR347C	-2.45139	1.36792e-16				YHR081W	1.35244	2.13347e-05				YIL073C	-1.87349
									YLL005C	-5.85122	2.06762e-09	YBR189W	-1.60608	1.13095e-07	YDR403W	-2.16229	0.00438259	YFL054C	-1.25707	0.0100433	YJR149W	1.83669	0.000264275	YMR271C	1.23503	0.0215192	YKR106W	2.65951	2.11265e-05				YCL055W	1.05476	3.93453e-06	YER124C	-2.14784	2.65824e-16				YFL055W	1.21415	2.19576e-05				YPL150W	-1.05348
									YBR016W	-1.28602	2.28515e-09	YBR045C	-3.17939	1.19758e-07	YLR287C-A	-1.84087	0.00460222	YBR020W	-1.02513	0.010401	YMR105C	-1.78376	0.00026853	YOR010C	1.53769	0.0216871	YMR233W	1.33752	2.28362e-05				YPR156C	1.02012	4.1422e-06	YJR151C	-3.50392	2.71239e-16				YMR123W	1.07404	2.22438e-05				YBL015W	-1.42091
									YDR374C	-5.69376	2.39745e-09	YHR039C-A	-1.48384	1.20063e-07	YML026C	-2.00751	0.00470403	YKL163W	-1.04757	0.010401	YKL054C	-1.03688	0.000276049	YDL021W	1.03882	0.0222448	YIL163C	2.10676	2.31261e-05				YLR036C	1.12312	4.243e-06	YHR096C	-6.1187	3.83696e-16				YBR292C	1.34011	2.36133e-05				YLL028W	-1.00065
									YAL067C	-5.00773	2.6317e-09	YPL077C	-1.64536	1.40884e-07	YDR099W	-1.5794	0.0048262	YIL054W	-1.24294	0.0104344	YDR317W	-1.37393	0.000276883	YNR069C	1.13455	0.0232918	YCR097W	1.2552	2.31437e-05				YMR122W-A	1.19005	4.85672e-06	YOR383C	-4.7465	4.39189e-16				YHR214C-E	3.28962	2.50312e-05				YER091C	-2.166
									YDL239C	-3.02638	2.87379e-09	YFR015C	-2.22998	1.4428e-07	YML024W	-1.78474	0.00492282	YGL205W	-2.15081	0.0107894	YNL336W	-2.62494	0.000282036	YNR060W	1.44674	0.0234884	YGL007C-A	1.47674	2.50387e-05				YGL179C	1.09634	4.93303e-06	YNL065W	-2.51574	4.53266e-16				YDL052C	1.1174	2.52523e-05				YJR154W	-1.47862
									YER128W	-2.18518	3.72761e-09	YBL028C	-1.20567	1.48636e-07	YPL021W	-6.36397	0.00492282	YER188W	-2.46873	0.0107894	YDR486C	-1.34567	0.000301872	YDR223W	1.80474	0.0244286	YGR121W-A	1.37158	2.52334e-05				YDR102C	1.83998	5.05901e-06	YOR306C	-2.45219	2.71057e-15				YOL104C	1.20325	2.58813e-05				YMR315W-A	-2.47223
									YLR167W	-1.55571	3.72761e-09	YNL279W	-3.07309	1.78578e-07	YMR017W	-4.59086	0.00498678	YDR259C	-1.17567	0.0108427	YLR255C	1.37243	0.000326796	YKL148C	1.13402	0.0263478	YLL049W	1.08258	3.07811e-05				YKR009C	1.24213	5.16768e-06	YLL009C	-1.4875	2.71057e-15				YGR111W	1.09805	2.601e-05				YHR044C	-1.28553
									YGL205W	-3.6762	5.56775e-09	YOR351C	-5.75298	2.76358e-07	YDR380W	-1.73791	0.00508657	YJL217W	-1.38794	0.0113624	YDL213C	-1.23279	0.000329132	YBR012C	1.33045	0.026384	YGR039W	1.48562	3.20455e-05				YMR150C	1.05672	5.69334e-06	YDR406W	-4.5128	5.40644e-15				YOR019W	1.21496	2.83271e-05				YJL153C	-3.10268
									YHL015W	-1.27973	5.56775e-09	YJL190C	-2.15762	3.39049e-07	YDR471W	-1.77046	0.00516817	YBR145W	-2.90884	0.0117147	YBR167C	-1.29921	0.000329576	YIR030C	1.49404	0.0265703	YDL021W	2.34694	3.45199e-05				YHR043C	1.24771	5.7142e-06	YLL026W	-2.49502	5.93853e-15				YDR185C	1.17275	2.97454e-05				YDR273W	-1.58323
									YIL066C	-3.04477	5.98211e-09	YFL034C-A	-1.09315	3.65183e-07	YGR085C	-2.04997	0.00519923	YIL014C-A	-1.28815	0.0120294	YMR230W-A	1.2101	0.000354184	YDR274C	2.88399	0.0270688	YOR390W	1.44369	3.47095e-05				YGR016W	1.0734	6.52907e-06	YCR005C	-1.93449	6.33133e-15				YLR364W	1.19307	3.07722e-05				YDR535C	-1.72861
									YHR185C	-7.53544	6.12802e-09	YPL037C	-1.66995	3.67038e-07	YOL118C	-4.27409	0.00526381	YMR095C	-3.03665	0.0131199	YMR017W	-4.2054	0.000364135	YNR070W	1.21682	0.02709	YHR043C	1.48094	4.05426e-05				YIL050W	1.10353	6.55165e-06	YBR296C	-6.41235	7.10798e-14				YJR047C	2.03162	3.53345e-05				YPL058C	-1.08676
									YDR353W	-1.09078	6.74925e-09	YKL224C	-10.9058	3.67038e-07	YKR076W	-1.91726	0.00526381	YER054C	-1.8115	0.0132154	YHR184W	-1.56747	0.0003786	YIR027C	2.0544	0.0271626	YMR254C	2.8695	4.11051e-05				YEL005C	1.39141	7.55317e-06	YDL021W	-3.05664	7.37981e-14				YHR088W	1.00139	4.19216e-05				YJL089W	-1.89475
									YLL009C	-1.13718	6.74925e-09	YKR057W	-1.1713	3.81942e-07	YGR240C	-1.83323	0.00532506	YDR223W	-1.35474	0.0136149	YPL209C	-1.73809	0.000382805	YNR044W	1.09087	0.0283545	YFL055W	1.07758	4.28726e-05				YCR101C	1.53388	7.5834e-06	YMR105C	-2.35028	1.87919e-13				YDR482C	1.22455	4.67248e-05				YIR013C	-3.2703
									YFR023W	-5.58477	7.26739e-09	YBR148W	-4.12176	3.99173e-07	YDR486C	-1.46994	0.00536847	YGL251C	-1.15784	0.0146658	YGR130C	-1.26242	0.000386696	YBR157C	1.15905	0.0284657	YPR020W	1.27034	4.49442e-05				YBL029C-A	1.24676	8.0727e-06	YBR016W	-1.46943	3.07341e-13				YMR236W	1.21671	4.83535e-05				YBR024W	-1.08389
									YMR107W	-5.58963	9.36747e-09	YHR021C	-1.55761	4.00492e-07	YPR025C	-1.18508	0.00536847	YJL170C	-1.11909	0.0153267	YMR014W	-1.02241	0.000435918	YBL098W	1.25461	0.0314447	YNL200C	1.13253	5.50042e-05				YBR183W	1.02118	8.3067e-06	YBR295W	-1.31667	5.68315e-13				YNL158W	1.04449	5.33423e-05				YHR210C	-1.15153
									YPR001W	-2.89214	1.16596e-08	YNL018C	-5.26295	4.54057e-07	YIL018W	-2.05847	0.00555899	YML118W	-1.81616	0.0153267	YKL004W	1.30205	0.000463126	YML066C	2.43661	0.0319178	YOR019W	1.08442	5.58858e-05				YMR016C	1.06802	9.53489e-06	YNL079C	-1.50305	6.11648e-13				YLR385C	1.70663	5.69963e-05				YLR004C	-1.43443
									YMR319C	-1.50799	1.21654e-08	YDL082W	-1.39729	5.29957e-07	YER117W	-1.81763	0.00556771	YOL013W-B	-1.2707	0.01545	YER111C	-1.62741	0.000468084	YAR020C	3.01351	0.0319636	YKL026C	1.381	6.54953e-05				YPR201W	2.05252	9.78878e-06	YJL105W	-7.01469	9.95924e-13				YDL037C	1.29857	5.75001e-05				YDL197C	-1.0574
									YMR244W	-4.82859	1.23865e-08	YHR203C	-2.27134	5.99725e-07	YOL121C	-2.03564	0.00556771	YLL025W	-1.43934	0.0172146	YDL248W	-1.38311	0.000476961	YGL183C	3.20672	0.0329985	YJL196C	1.21854	6.56334e-05				YMR151W	1.54781	1.04539e-05	YDR001C	-1.44512	1.07508e-12				YCL049C	1.46393	7.21075e-05				YCL048W	-1.6452
									YGL156W	-2.26212	1.27732e-08	YIR042C	-2.27098	5.99725e-07	YGR118W	-2.03518	0.00558502	YBR196C-A	-1.15494	0.0174842	YMR081C	-1.83887	0.000497865	YFL056C	1.08735	0.0330983	YBL059W	1.29442	6.56334e-05				YPR200C	2.96035	1.11804e-05	YIL066C	-3.98105	8.73019e-12				YNL001W	1.01083	7.35599e-05				YOR374W	-2.30544
									YHR177W	-3.2894	1.32776e-08	YLR044C	-2.68615	5.99725e-07	YCL018W	-7.2618	0.00581737	YDR475C	-1.21489	0.0176174	YDR216W	-1.78586	0.000499998	YCR098C	2.00223	0.0385129	YLR099W-A	1.15088	7.19652e-05				YOL024W	2.63153	1.24036e-05	YHR016C	-1.87117	9.62217e-12				YLR370C	1.0004	7.76669e-05				YFL014W	-2.7685
									YOL110W	-1.46798	1.49734e-08	YBL087C	-2.27381	6.40084e-07	YCL064C	-1.35382	0.00581737	YOR173W	-1.19276	0.0184786	YKL129C	-1.19224	0.000557943	YNR034W-A	1.36308	0.038729	YAL062W	1.45109	7.19652e-05				YER150W	1.34432	1.24139e-05	YCL064C	-1.78371	1.92558e-11				YDL148C	1.01526	8.56515e-05				YPL250C	-1.02325
									YDR522C	-6.93389	1.49734e-08	YLL024C	-1.69588	6.40084e-07	YLL030C	-5.84266	0.00593828	YGR249W	-1.33246	0.0191379	YDL206W	1.06848	0.000557943	YGR221C	1.04265	0.0406074	YJR116W	1.16954	7.23895e-05				YGL182C	1.54404	1.37605e-05	YML100W	-2.64721	3.36492e-11				YOR023C	1.15113	9.55352e-05				YIL169C	-1.71718
									YGR192C	-3.18232	1.75594e-08	YMR230W	-1.82933	6.95046e-07	YHL001W	-2.26327	0.00593828	YDR523C	-1.42695	0.0195704	YNL229C	-1.00296	0.000622377	YCR085W	2.65711	0.0406074	YER150W	1.55305	7.5e-05				YJR124C	1.00964	1.40635e-05	YMR219W	-1.93957	3.63472e-11				YGL124C	1.09681	0.000102348				YNR071C	-1.2769
									YDR034W-B	-3.71536	1.82686e-08	YDR025W	-1.58038	7.46304e-07	YBR012C	-1.45788	0.0061097	YDL222C	-1.17937	0.019582	YCR061W	1.027	0.000630069	YHL044W	1.152	0.0408421	YDR170W-A	1.61907	7.92783e-05				YDL039C	1.39633	1.45855e-05	YFL038C	-1.2453	4.43708e-11				YJR082C	1.05862	0.000118193				YMR095C	-2.40359
									YJL190C	-1.97021	1.90421e-08	YNL069C	-1.59203	8.05367e-07	YBR072W	-1.70775	0.00616365	YOR391C	-3.94772	0.0205233	YBR105C	-1.03473	0.000654046	YDR523C	1.02263	0.0410092	YER158C	1.10907	7.95145e-05				YAL037W	1.4106	1.51741e-05	YOR178C	-5.233	6.1834e-11				YKL143W	1.09811	0.000124012				YJL219W	-3.19681
									YMR133W	-5.1678	1.91984e-08	YKL217W	-2.79191	8.11294e-07	YHR096C	-3.38861	0.00618426	YNL092W	-1.95761	0.0208522	YKL095W	-1.63595	0.000658903	YBR299W	4.18951	0.0444523	YER053C-A	2.28443	8.33027e-05				YMR141C	1.63415	1.52897e-05	YHR143W	-1.75545	6.56657e-11				YKR049C	1.27844	0.00013873				YOL117W	-1.34287
									YDR471W	-1.7524	2.048e-08	YKR094C	-2.50404	9.22402e-07	YKL056C	-1.96336	0.00629781	YCR104W	-3.52554	0.0219176	YHR022C-A	1.15801	0.000671832	YGR087C	1.98069	0.0466009	YER053C	1.1925	8.75624e-05				YJR055W	1.14658	1.84541e-05	YLR110C	-1.80875	6.95774e-11				YPR112C	1.02127	0.000142976				YLR256W	-1.43111
									YGR087C	-3.7793	2.08611e-08	YHR174W	-2.89097	9.22402e-07	YGL205W	-2.39854	0.00630049	YMR244W	-2.12651	0.022091	YDL148C	-1.07781	0.000677906	YFL060C	4.08302	0.0497722	YGR250C	1.40191	9.49256e-05				YCR024C	1.33803	1.86626e-05	YJR009C	-2.85006	7.11363e-11				YER180C-A	1.25549	0.000147996				YGR203W	-1.27181
									YPL230W	-3.20557	2.09314e-08	YPL090C	-1.68246	9.29942e-07	YHR203C	-2.01779	0.00630049	YBR148W	-2.45675	0.0222895	YOR162C	-1.1619	0.000678372	YLR442C	-2.77942	1.78333e-36	YKL187C	1.31738	9.52497e-05				YHL028W	4.05649	1.99967e-05	YFR019W	-1.33363	9.55664e-11				YDR123C	1.3594	0.000153019				YMR068W	-1.27943
									YJL038C	-4.78829	2.27603e-08	YBL098W	-1.75488	9.29942e-07	YGR201C	-1.30022	0.00631565	YMR232W	-1.55353	0.0225336	YKL072W	-1.21502	0.000683304	YLR449W	-2.949	4.62239e-36	YLR036C	1.47082	0.000105634				YHL044W	2.34589	2.01052e-05	YDR534C	-3.17158	2.34685e-10				YDR170W-A	1.51908	0.000162323				YMR058W	-2.06675
									YGL189C	-2.48388	2.30641e-08	YHR010W	-1.77356	9.30696e-07	YKR066C	-1.88085	0.00631565	YGL096W	-1.12557	0.0235976	YMR147W	-1.00909	0.000689819	YLR455W	-1.73377	1.35053e-34	YDR274C	3.42293	0.000116223				YIR005W	1.24535	2.30002e-05	YER164W	-1.84888	2.44584e-10				YPL233W	1.23171	0.000237956				YHR007C	-1.56506
									YMR018W	-4.42099	2.37686e-08	YBR181C	-2.29084	9.42448e-07	YMR303C	-1.39128	0.00631565	YDR258C	-1.06193	0.0236005	YNL224C	-1.05618	0.000697067	YLR451W	-1.95836	2.2915e-27	YMR098C	1.0833	0.000126614				YBR167C	1.21518	2.67759e-05	YLR256W-A	-2.12033	5.79897e-10				YOL126C	2.19748	0.000251486				YDL239C	-1.07081
									YFL053W	-4.5192	2.5479e-08	YML026C	-1.98879	9.42448e-07	YFL038C	-1.06268	0.00643537	YFL019C	-3.14518	0.024532	YHR082C	-1.01212	0.00071743	YLR419W	-2.16058	2.19266e-23	YJL214W	1.56149	0.000137564				YER028C	1.40087	3.15427e-05	YOR049C	-2.54601	6.77313e-10				YCR097W	1.04472	0.000264344				YCR102W-A	-3.97142
									YDR037W	-1.13417	3.19896e-08	YDL079C	-3.56938	9.78324e-07	YPL240C	-1.22302	0.00647636	YER188C-A	-1.32946	0.0248291	YBR183W	1.01621	0.000840979	YLR412W	-1.42426	9.38342e-21	YMR122C	2.17277	0.000139355				YBL016W	1.07376	3.15671e-05	YBR052C	-1.68387	1.36446e-09				YDR059C	1.27211	0.000332337				YLL063C	-1.07383
									YLR307C-A	-7.38383	4.16729e-08	YFL011W	-4.3388	1.13327e-06	YIR027C	-2.21384	0.00647739	YIR028W	-1.68066	0.0249413	YPR113W	1.18613	0.000886054	YLR425W	-2.22242	5.13853e-20	YOR347C	1.34556	0.000151144				YGR109C	1.01709	3.55219e-05	YIL051C	-1.80254	1.71088e-09				YJL162C	1.00988	0.000344672				YJR130C	-1.04563
									YIL019W	-1.25328	4.61775e-08	YBR186W	-4.22688	1.15386e-06	YDL082W	-1.75062	0.0066128	YOR192C	-1.03114	0.0260943	YGL012W	1.06669	0.000896465	YLR361C-A	-1.73109	2.84525e-19	YCR006C	1.16912	0.000174837				YDR070C	2.27462	3.60018e-05	YGR110W	-4.37585	2.21478e-09				YLR130C	1.14604	0.000352815				YMR017W	-2.59736
									YOL109W	-1.78297	4.62579e-08	YOL120C	-2.43521	1.21204e-06	YER131W	-1.75672	0.00661661	YGL037C	-1.22176	0.0262117	YPL230W	-1.76568	0.000922457	YLR274W	-1.53965	5.21506e-19	YAR028W	1.28492	0.000181102				YDR472W	1.26828	4.05456e-05	YKL071W	-5.15278	2.25979e-09				YNL282W	1.05562	0.000407551				YDR343C	-2.1418
									YLR249W	-2.12902	5.2425e-08	YNL210W	-5.37029	1.23951e-06	YNL069C	-1.81053	0.00661661	YBR284W	-1.02274	0.0269771	YGR271C-A	-1.09501	0.000929824	YLR287C	-1.31495	1.59905e-17	YOR343C	1.31644	0.000188074				YMR169C	1.17745	4.26421e-05	YKR076W	-3.04865	2.45667e-09				YGR201C	1.10482	0.000415015				YKL072W	-1.30566
									YER054C	-4.25596	5.7375e-08	YNR062C	-4.08214	1.23951e-06	YGL031C	-1.84051	0.0066288	YKL221W	-1.98526	0.0272275	YKL172W	-1.11132	0.000958125	YDR380W	-5.06572	7.89839e-17	YOR020W-A	1.17078	0.000229295				YAL061W	1.05437	4.41162e-05	YAL017W	-1.91995	4.34734e-09				YER018C	1.00815	0.00061858				YOR177C	-2.05439
									YDR446W	-6.88749	5.77468e-08	YDL081C	-2.98698	1.26029e-06	YHR124W	-1.53474	0.00675467	YIL083C	-1.06322	0.0272275	YDR043C	-1.57268	0.000977618	YBR111C	-1.48798	2.46014e-16	YGR243W	2.03459	0.000234236				YOR051C	1.02042	5.04651e-05	YGR143W	-1.49013	4.60191e-09				YHL018W	1.20599	0.000714996				YJR152W	-1.06554
									YGR161C	-2.35595	5.77468e-08	YIL052C	-1.15201	1.27125e-06	YIR039C	-2.37011	0.00697487	YMR018W	-1.36882	0.0285895	YDR285W	-1.66522	0.00100882	YLR453C	-2.23569	2.69624e-16	YBR070C	1.02511	0.000260256				YDR493W	1.1205	5.18188e-05	YGR032W	-1.82669	6.95369e-09				YGR126W	1.17792	0.000811717				YCR014C	-1.27907
									YNL162W	-1.53755	5.81176e-08	YOR312C	-1.65903	1.31799e-06	YPL077C	-1.00013	0.00700332	YDR533C	-1.30403	0.0301972	YJR124C	1.15348	0.00102108	YIL169C	-5.50048	4.76367e-16	YGL007W	1.77929	0.000299437				YGL258W	1.91861	5.60114e-05	YIL053W	-1.66259	7.0063e-09				YPR158W	1.03026	0.000870806				YNR070W	-1.28714
									YBR189W	-1.57023	5.94564e-08	YLR333C	-1.8821	1.46114e-06	YGR250C	-1.12979	0.00700332	YJL215C	-1.22546	0.0309907	YGR169C-A	-1.1973	0.00103989	YLR330W	-1.62544	1.70436e-15	YFL003C	1.80961	0.000301126				YDL057W	1.08026	5.61741e-05	YLL039C	-2.57105	9.1665e-09				YLR059C	1.12016	0.000902299				YLR056W	-1.75187
									YMR232W	-2.97017	6.1684e-08	YOR133W	-3.98344	1.47448e-06	YBR040W	-2.43173	0.00766407	YJR161C	-1.78205	0.0314398	YIL145C	1.07861	0.00104925	YLR426W	-1.75117	1.97175e-15	YJL170C	1.54853	0.000301126				YHR209W	1.5577	6.45045e-05	YDR345C	-1.7387	1.07173e-08				YCR095W-A	1.45596	0.000908544				YGR244C	-1.59302
									YER062C	-1.4309	6.52985e-08	YOL109W	-1.63975	1.48774e-06	YOR096W	-1.57149	0.00788827	YDL085W	-1.61637	0.0318145	YER054C	-2.42009	0.00118854	YLR328W	-1.39761	1.99537e-15	YDL196W	1.53424	0.00031326				YKL162C	1.24733	6.77413e-05	YPL230W	-3.09508	2.10422e-08				YPL279C	1.2066	0.00102786				YKL023W	-1.02847
									YNL079C	-1.24167	7.33195e-08	YDR306C	-1.48574	1.49061e-06	YHL015W	-1.33354	0.00796644	YEL009C	-1.09073	0.0337703	YGR197C	1.09204	0.00118854	YLR448W	-2.80234	2.12055e-15	YKL102C	1.61059	0.0003143				YKL065W-A	1.88142	6.89187e-05	YER111C	-2.05305	2.2194e-08				YLR245C	1.69546	0.00112114				YER145C	-2.10919
									YJL089W	-4.4653	8.05595e-08	YBR019C	-3.39522	1.73232e-06	YPL129W	-1.89716	0.00806067	YBR297W	-1.70871	0.0351446	YDL181W	-1.09135	0.00121015	YNL208W	-1.98997	3.27713e-15	YHR184W	1.90897	0.00035269				YAL062W	1.26693	6.94538e-05	YBR196C	-1.47672	2.22421e-08				YIL132C	1.06468	0.00173553				YDL243C	-1.09442
									YKL217W	-2.72844	1.05077e-07	YDL083C	-2.54979	1.93047e-06	YHR007C	-1.59435	0.00834536	YDL244W	-2.73392	0.0355241	YGL007W	1.80238	0.00123416	YLR450W	-1.95373	6.91106e-15	YLL055W	1.27236	0.000360053				YPR194C	1.33674	7.74962e-05	YLR137W	-1.20156	2.22421e-08				YDL123W	1.02615	0.00175675				YGL026C	-1.22378
									YCR018C	-1.45393	1.05077e-07	YJR123W	-1.86609	2.17584e-06	YDL039C	-1.24534	0.00839928	YDL239C	-1.10419	0.0368422	YBR252W	1.22753	0.00134319	YGR169C-A	-1.45763	9.0145e-15	YNL146W	1.72162	0.000387026				YGR243W	2.05091	8.19822e-05	YDR099W	-1.4512	3.16471e-08				YOL135C	1.0464	0.00175675				YPR002W	-1.4466
									YKL216W	-1.03393	1.05416e-07	YOR167C	-2.0266	2.36478e-06	YPR074C	-1.73545	0.00839928	YLL057C	-1.53443	0.040234	YDR314C	-1.05814	0.00134319	YBR196C	-1.6185	8.50618e-14	YPL279C	1.58858	0.00038747				YLL063C	1.04345	8.98659e-05	YGL138C	-8.71482	3.40394e-08				YML087C	1.10457	0.00221678				YCR102C	-1.6981
									YAR050W	-3.09622	1.09129e-07	YHR015W	-2.95359	2.41269e-06	YOR134W	-4.24511	0.00839928	YBR018C	-1.23522	0.0440517	YIL134W	1.19553	0.00138902	YBR082C	-1.93526	1.498e-13	YJL218W	2.216	0.000415085				YJL206C	1.01543	9.19497e-05	YEL049W	-7.33459	4.12703e-08				YNL334C	3.42915	0.00307409				YML042W	-1.20402
									YAL012W	-1.29324	1.09129e-07	YMR143W	-1.70641	2.62071e-06	YPL061W	-1.8725	0.00860604	YPL274W	-1.01838	0.0461444	YLR425W	-1.00769	0.00147004	YLR447C	-2.24859	1.6636e-13	YLR112W	1.07391	0.000418856				YPR030W	1.11672	0.000108287	YJL079C	-1.55572	4.18203e-08				YOR316C-A	1.47841	0.00724948				YLR177W	-1.51149
									YLR110C	-1.78966	1.09129e-07	YDL133C-A	-1.70108	3.20382e-06	YNL178W	-1.97506	0.00881499	YNL128W	-1.51798	0.0472914	YGR121C	1.02291	0.00147937	YLR436C	-1.54516	1.74064e-13	YMR147W	1.09982	0.000425921				YGL185C	1.20904	0.000152402	YGL262W	-8.95739	4.20089e-08				YOR008C-A	1.5664	0.00751594				YOR384W	-2.83543
									YNL196C	-5.21609	1.102e-07	YLR325C	-1.86899	3.28134e-06	YOL132W	-3.37455	0.00881499	YER060W	-1.19192	0.0486289	YGR121W-A	1.10127	0.00147937	YBR286W	-1.56474	3.5585e-13	YHR214W	1.56988	0.000434471				YHR176W	1.00505	0.000156179	YLR178C	-2.32855	7.16899e-08				YER084W	1.60098	0.00777982				YOR376W	-2.97453
									YKR102W	-2.64207	1.10877e-07	YFR016C	-2.93658	4.12067e-06	YGR214W	-1.78214	0.00895567				YHL048W	-1.21047	0.00160018	YLR363W-A	-1.21467	3.84181e-13	YLR213C	1.19556	0.000443969				YER062C	1.14863	0.000165012	YBR294W	-7.16954	7.16899e-08				YGL033W	1.85319	0.00923412				YML109W	-1.11645
									YLR109W	-2.1998	1.36807e-07	YDR034W-B	-3.66805	4.12067e-06	YGL258W-A	-4.42074	0.00895567				YGR009C	-1.04679	0.00169392	YBR244W	-1.76655	1.03358e-12	YDL057W	1.54511	0.000483836				YNL138W-A	1.0994	0.000168383	YPL272C	-3.65108	9.52025e-08				YNL097C-B	1.37817	0.0104439				YDL248W	-1.74072
									YPR184W	-2.40129	1.43414e-07	YKL050C	-3.53803	4.12067e-06	YLR325C	-2.04217	0.00902493				YER180C	-1.10295	0.00171219	YLR410W	-1.95776	1.03358e-12	YBR167C	1.22589	0.000553661				YBL029W	2.72261	0.000185374	YDL130W-A	-2.19566	1.28467e-07				YCR018C-A	1.28454	0.0105929				YPL272C	-1.33168
									YLR044C	-2.44263	1.438e-07	YML063W	-1.41184	4.12067e-06	YBR084C-A	-1.33732	0.00904014				YDL039C	1.51482	0.00172238	YLR437C	-1.39612	3.75073e-12	YJL206C	1.31907	0.000568974				YHL015W-A	2.95905	0.000208806	YIL154C	-1.78297	1.49064e-07				YAR070C	3.20055	0.0123692				YIR027C	-1.8034
									YJL043W	-4.14628	1.46534e-07	YIR027C	-3.27884	4.20151e-06	YOL123W	-1.03451	0.00904014				YPL220W	1.06034	0.00189293	YNL192W	-1.26497	1.88557e-11	YCR085W	1.29764	0.000578527				YLR154C	1.20277	0.000281042	YBL005W	-1.73491	1.60993e-07				YGL263W	1.33063	0.0123733				YDL222C	-1.32523
									YDR064W	-1.38646	1.49902e-07	YIL066C	-2.84473	4.85501e-06	YER003C	-1.4597	0.00926878				YPL060W	-1.125	0.00189293	YOL121C	-1.65917	3.01394e-11	YKR097W	1.844	0.000589724				YEL068C	1.00393	0.000285347	YML054C	-3.32587	1.62541e-07				YOR161C-C	1.42756	0.0144949				YLR178C	-1.64654
									YOL104C	-1.70921	1.51178e-07	YBL027W	-2.5371	5.51852e-06	YFR016C	-3.4223	0.00984752				YNL125C	-1.20355	0.00190186	YLR424W	-1.49246	4.54972e-11	YLR460C	1.66137	0.000644033				YLR124W	1.14652	0.000350488	YOL158C	-1.52665	1.78313e-07				YHR214W-A	3.47862	0.019509				YEL009C	-1.62039
									YPR054W	-4.77676	1.6228e-07	YER054C	-3.0944	5.84092e-06	YDR050C	-2.01779	0.00990362				YCR018C-A	1.55806	0.00212784	YNL110C	-1.18946	5.07754e-11	YMR069W	1.15678	0.000723318				YJL170C	1.81628	0.00036878	YHR179W	-1.34123	1.8343e-07				YER044C-A	1.00897	0.0231467				YOR024W	-2.29324
									YDR285W	-3.57379	1.62623e-07	YLR029C	-1.13189	6.58788e-06	YIR030C	-1.95407	0.00994142				YKL023W	-1.19728	0.00215347	YLR441C	-2.72549	6.3345e-11	YDL183C	1.1952	0.000814589				YDR170W-A	1.11021	0.000395179	YBL043W	-2.45361	1.8514e-07				YIL163C	1.26526	0.0335527				YOR348C	-1.03919
									YDL082W	-1.4457	1.87982e-07	YDR403W	-3.10697	6.6388e-06	YBR298C-A	-7.69701	0.00995097				YKR097W	-1.68475	0.00216164	YPR154W	-1.04863	9.8128e-11	YBR157C	1.23925	0.000856937				YPR157W	1.55372	0.000428605	YJR095W	-6.50846	1.88802e-07				YHL015W-A	1.76044	0.0360449				YMR018W	-1.24337
									YOR351C	-5.50419	1.94207e-07	YJR150C	-5.48827	6.69597e-06	YOR133W	-3.81579	0.0100141				YDR343C	-2.9948	0.00217344	YBR181C	-1.48229	1.09417e-10	YJL052W	1.10315	0.000934935				YDR024W	1.01314	0.000491357	YIR034C	-1.5591	2.02583e-07				YDL196W	1.16456	0.0417144				YGR144W	-1.62921
									YBL071C-B	-3.31118	2.00343e-07	YGR034W	-2.07923	6.75121e-06	YDL061C	-2.05275	0.0100958				YLR245C	1.00222	0.00225785	YDL148C	-1.24915	1.51881e-10	YER046W	1.16191	0.00103916				YEL028W	1.0142	0.000500637	YMR095C	-5.51881	2.046e-07				YHL024W	-6.85762	1.05641e-177				YJL213W	-1.1536
									YDL055C	-1.44529	2.28696e-07	YDR385W	-2.57114	6.90521e-06	YHR216W	-1.74018	0.0100997				YNR068C	-2.01	0.00231554	YHR088W	-1.35763	1.74908e-10	YFR054C	1.74671	0.00106558				YDR535C	1.61814	0.000671862	YOR134W	-6.34088	2.15311e-07				YOL052C-A	-5.86945	9.47529e-112				YPR145W	-1.21328
									YIL169C	-3.72148	2.89392e-07	YDR050C	-1.98432	6.96617e-06	YIL069C	-1.61013	0.0103571				YGL249W	-1.42332	0.00239845	YER164W	-1.41652	1.99857e-10	YGR096W	1.02315	0.00110119				YNR060W	1.32004	0.000745329	YAL061W	-2.14945	2.44652e-07				YOR178C	-6.47224	1.16329e-109				YDR213W	-1.24522
									YBR040W	-3.86784	2.9645e-07	YNL112W	-1.09812	8.55668e-06	YBR011C	-1.40142	0.0106268				YHR096C	-2.07649	0.00250871	YOL123W	-1.37848	2.32352e-10	YGR109C	1.22114	0.00112779				YBR054W	1.21444	0.00076561	YMR280C	-4.05729	2.45963e-07				YBR072W	-5.06317	3.68836e-107				YBR068C	-1.12867
									YOL123W	-1.11543	4.19945e-07	YBL050W	-1.52795	9.16412e-06	YJR123W	-2.02969	0.0109583				YOR010C	1.31552	0.00253757	YLR310C	-1.43809	2.41523e-10	YGR249W	1.37808	0.00113638				YER179W	2.18019	0.000803664	YLL040C	-1.15085	2.45963e-07				YJL052W	-4.45576	4.19117e-98				YGL184C	-1.99871
									YHR010W	-1.55608	4.42472e-07	YER033C	-2.14823	1.05516e-05	YLR301W	-1.31046	0.0113653				YOR113W	-1.08611	0.00256621	YOL127W	-1.68578	6.05321e-10	YJR096W	1.00974	0.00117495				YHR157W	1.42593	0.000932668	YHL040C	-2.39598	2.89087e-07				YKL071W	-7.13216	2.30402e-79				YAL017W	-1.02806
									YOR177C	-4.15329	4.57156e-07	YOL121C	-2.16326	1.10295e-05	YLR411W	-1.56343	0.0113837				YGL258W-A	-4.31512	0.00257405	YOR206W	-1.35536	6.41166e-10	YOR050C	1.39079	0.00121159				YOR268C	1.35513	0.000939654	YKR046C	-1.61693	2.96717e-07				YOL155C	-4.42636	2.73224e-73				YJR074W	-1.50333
									YOL015W	-2.41412	4.60385e-07	YLR185W	-2.384	1.13907e-05	YOR167C	-1.94048	0.0114281				YJL205C	1.34032	0.00261465	YDR429C	-1.20695	7.59466e-10	YDR342C	3.8229	0.0012567				YKL102C	1.28609	0.00094	YGL028C	-1.67186	3.04247e-07				YOR383C	-4.84836	1.59747e-72				YHR217C	-3.09807
									YOL127W	-2.38857	4.69904e-07	YML058W	-1.10558	1.14696e-05	YMR280C	-2.22367	0.0120497				YPR191W	-1.06947	0.00278673	YPL146C	-1.24113	8.67237e-10	YMR112C	1.15304	0.00146688				YLL057C	1.29252	0.00119383	YNR064C	-6.46612	3.19045e-07				YOR384W	-5.43962	9.58519e-72				YHR185C	-3.44262
									YNL194C	-5.27854	4.93195e-07	YLR110C	-1.80449	1.22287e-05	YHR126C	-4.41098	0.0121672				YMR219W	-1.17344	0.00282759	YDL208W	-1.04438	8.97045e-10	YMR042W	1.00094	0.0015676				YLL062C	1.57534	0.0012033	YHR174W	-1.97338	3.25238e-07				YIL101C	-5.20988	2.62206e-71				YOR049C	-1.04402
									YDR486C	-2.04011	4.93195e-07	YGL031C	-2.03966	1.25165e-05	YJL001W	-1.38947	0.012209				YHR179W	1.03601	0.0028663	YLR291C	-1.06285	9.03624e-10	YNL024C	1.06254	0.0015676				YLR390W	1.03705	0.00153513	YPL054W	-3.82484	3.26262e-07				YMR102C	-3.14773	1.4394e-68				YOR391C	-3.66068
									YLR112W	-1.43437	5.04387e-07	YIL018W	-2.0434	1.28956e-05	YNR068C	-2.2843	0.0125577				YGL061C	-1.22191	0.00289383	YLR293C	-1.61331	1.22177e-09	YNL334C	2.49904	0.00169779				YDR344C	1.15836	0.00167004	YFR023W	-5.87219	3.30546e-07				YHL040C	-3.21252	1.24985e-66				YBR196C	-1.6937
									YMR219W	-1.32193	5.5418e-07	YGR059W	-3.94311	1.29086e-05	YDL133C-A	-1.41388	0.012658				YPR010C-A	-1.31574	0.00289383	YLR459W	-1.54645	1.37966e-09	YHR001W-A	1.21482	0.00175396				YOR008C-A	2.86006	0.0016831	YFL020C	-6.48151	3.79338e-07				YMR105C	-4.31647	7.45806e-66				YJL130C	-1.59873
									YJR145C	-2.18082	5.77835e-07	YLR341W	-4.76373	1.60102e-05	YLR167W	-1.67861	0.0127546				YOR237W	1.85906	0.00292107	YLR346C	-3.48911	2.27095e-09	YBL109W	4.03771	0.00178831				YCR015C	1.60252	0.00183124	YOR173W	-3.32745	3.8357e-07				YNL160W	-3.81436	4.04981e-62				YER026C	-1.19268
									YDL184C	-2.63085	7.04548e-07	YBR072W	-2.99402	1.8036e-05	YGL255W	-1.22688	0.0127714				YLR341W	-2.59702	0.00297945	YLR454W	-3.25645	2.99211e-09	YDR540C	1.73849	0.00180009				YNR004W	1.0242	0.00206153	YJL159W	-1.95827	3.91092e-07				YFL014W	-9.61284	1.18483e-61				YGR287C	-1.78603
									YHR217C	-7.20101	7.13919e-07	YOL132W	-4.46508	1.83501e-05	YDR025W	-1.69678	0.0128565				YER072W	1.15875	0.00303191	YMR238W	-1.00616	4.63977e-09	YNL279W	1.09727	0.00180009				YGR221C	1.63222	0.00268878	YKL129C	-1.91248	3.92146e-07				YGR254W	-2.92529	1.78567e-54				YLR013W	-3.98366
									YDR380W	-2.60958	7.18905e-07	YHR007C	-1.49306	1.97249e-05	YMR099C	-1.83506	0.0128565				YKL071W	-2.29569	0.00313224	YBR048W	-1.7768	4.64265e-09	YBR046C	1.15888	0.00191028				YNL097C-B	1.67274	0.00293685	YLR029C	-1.23592	4.128e-07				YER053C-A	-4.64402	9.88785e-53				YMR136W	-1.05662
									YBR294W	-5.42609	9.29461e-07	YMR244W	-4.38296	2.00766e-05	YNL196C	-3.45379	0.0132628				YBR296C	-2.75569	0.00313224	YOR051C	-1.1668	5.01263e-09	YLR466C-B	2.83846	0.00195372				YHR214C-E	1.6263	0.00296765	YJR005C-A	-7.47779	5.56364e-07				YJL133C-A	-3.33904	1.33133e-48				YPL274W	-1.70464
									YML073C	-2.47616	9.49615e-07	YAL063C-A	-6.12471	2.41949e-05	YJL138C	-1.89125	0.0136229				YDL123W	1.06879	0.00321344	YBR025C	-1.43043	5.22371e-09	YPR157W	1.31601	0.00201363				YCR098C	1.0432	0.00308297	YER054C	-3.50979	5.6152e-07				YOR348C	-3.51114	1.80779e-46				YGL205W	-1.47163
									YOL120C	-1.96355	9.65548e-07	YDR450W	-1.62069	2.43214e-05	YIL073C	-1.83017	0.0137124				YER187W	-2.50609	0.00329975	YER002W	-1.38733	5.70158e-09	YIL054W	1.61161	0.00211916				YMR230W-A	1.01123	0.00324094	YLR044C	-1.47309	5.76201e-07				YML100W	-4.50948	8.69424e-46				YBR085W	-1.15381
									YLR355C	-1.27458	9.93982e-07	YGR214W	-1.38804	2.50859e-05	YKL074C	-1.05827	0.013971				YOL132W	-2.66304	0.00334452	YEL060C	-1.52119	6.25101e-09	YDR403W	1.56621	0.0024209				YGL183C	2.87319	0.00356797	YDR446W	-7.84317	6.10354e-07				YOR382W	-3.56058	1.37779e-44				YBR296C	-2.1171
									YBL072C	-3.29777	1.01205e-06	YLR081W	-3.11997	2.71763e-05	YGL147C	-1.86949	0.0143173				YJL037W	-2.14936	0.00342544	YLR051C	-1.14221	6.40643e-09	YBR196C-A	1.01401	0.00243304				YHR214W-A	3.48817	0.00459457	YDL055C	-1.09202	6.21954e-07				YOR355W	-2.22264	2.0435e-44				YAL037W	-1.69741
									YDR050C	-1.82434	1.10195e-06	YFL050C	-1.90828	2.82898e-05	YJL177W	-1.72143	0.0144888				YCR014C	-1.52675	0.0038354	YBR162W-A	-1.47803	7.27297e-09	YGL146C	1.09902	0.00253096				YEL019C	1.14848	0.00515947	YFL011W	-6.0016	6.88647e-07				YMR058W	-2.89736	2.12289e-44				YJR161C	-1.59521
									YOR063W	-1.25211	1.28192e-06	YLR213C	-1.73256	3.00915e-05	YBR189W	-1.6443	0.0144888				YGR244C	-1.30823	0.00402193	YLR221C	-1.01376	7.31478e-09	YDL181W	1.03681	0.00322558				YHL022C	1.42099	0.0091004	YLR012C	-11.073	7.641e-07				YOR153W	-3.05631	3.53712e-42				YOR382W	-4.0149
									YJL191W	-1.1172	1.32351e-06	YPL079W	-1.40921	3.16175e-05	YLR023C	-1.22201	0.0148057				YOR382W	1.12721	0.00411415	YLR409C	-1.2359	7.65761e-09	YOL084W	1.03261	0.00414221				YER135C	2.25186	0.0105838	YGR192C	-2.02302	8.09494e-07				YHR096C	-5.12439	3.53712e-42				YGL209W	-1.22831
									YPR074C	-1.31632	1.39225e-06	YBR048W	-2.23357	3.3838e-05	YML054C-A	-5.20721	0.0148713				YHR214C-E	2.26447	0.00430203	YLR264W	-1.15563	7.65761e-09	YHR094C	2.10312	0.00480104				YER181C	1.36076	0.010691	YNL066W	-1.20589	8.58351e-07				YLR109W	-2.71152	8.34913e-42				YOL015W	-1.23939
									YGR286C	-1.58742	1.46332e-06	YGL135W	-2.30913	3.52381e-05	YNL209W	-2.01707	0.0156337				YPL058C	-1.03815	0.00433845	YNR054C	-1.18348	7.94084e-09	YPR005C	1.05423	0.00482315				YGR052W	1.19566	0.0122752	YLL005C	-6.31602	8.58351e-07				YLL039C	-2.69023	1.26079e-40				YLR054C	-1.83327
									YJR123W	-1.74372	1.46699e-06	YOL123W	-1.04247	4.52514e-05	YHR160C	-4.74565	0.0156849				YBL109W	-2.45859	0.00440268	YBR249C	-1.24712	8.00559e-09	YJL037W	2.1642	0.00506114				YPL189W	1.17722	0.0158073	YIL099W	-5.65466	8.98173e-07				YGL156W	-2.90364	2.07104e-40				YDL085W	-1.75439
									YCL026C-A	-3.98101	1.49492e-06	YER138W-A	-2.86161	4.63772e-05	YLR262C-A	-1.19994	0.0158636				YDL079C	-2.41198	0.00440268	YOL158C	-2.11718	8.61737e-09	YGR142W	1.1959	0.00539499				YER053C-A	1.13705	0.0166943	YBR212W	-1.50253	9.31443e-07				YIL066C	-3.59648	1.1641e-39				YMR320W	-1.21171
									YIL026C	-1.05226	1.55711e-06	YPL160W	-1.84904	4.64606e-05	YIL133C	-1.66583	0.0159876				YNL133C	-1.38776	0.0045522	YHR208W	-1.46896	1.21086e-08	YIL107C	1.06733	0.00539499				YGL230C	2.2148	0.0201694	YIL032C	-7.77094	9.57011e-07				YMR251W	-4.1849	2.20347e-38				YKL103C	-1.43052
									YMR303C	-2.3277	1.64265e-06	YPR074C	-1.37813	4.64606e-05	YBR196C	-1.4349	0.015988				YAR070C	2.51844	0.00474017	YLR384C	-1.51003	1.65172e-08	YDR523C	1.67886	0.00711228				YFR032C	2.20835	0.0204915	YLR177W	-1.48422	1.02694e-06				YJR109C	-2.33068	3.04489e-36				YMR205C	-1.47264
									YKL050C	-2.51544	1.69134e-06	YNL224C	-1.50645	4.64606e-05	YHR020W	-1.52305	0.015991				YKR106W	-1.63898	0.00481085	YDR299W	-1.09705	1.9838e-08	YHR209W	1.32488	0.00728759				YNL146W	1.02193	0.0209513	YPR184W	-2.51581	1.04911e-06				YBR085C-A	-2.19334	6.62476e-36				YDR030C	-1.07588
									YGR037C	-1.81297	1.69902e-06	YPL131W	-1.82863	4.76905e-05	YDL055C	-1.54057	0.0165997				YGR070W	-1.23433	0.00481085	YCL064C	-1.70563	2.26512e-08	YER079W	1.35757	0.00731439				YDL210W	1.05576	0.0230933	YDR050C	-2.07704	1.07388e-06				YLR346C	-6.20494	1.46523e-35				YOL118C	-2.07094
									YDL133C-A	-1.61666	1.87217e-06	YLR355C	-1.20781	4.89797e-05	YER033C	-1.26526	0.0165997				YLR112W	1.27532	0.00503015	YOR385W	-1.98912	2.89926e-08	YLL062C	1.6024	0.00770251				YLR334C	2.37226	0.0237704	YOR185C	-2.09853	1.33103e-06				YBL005W	-2.38647	2.69442e-35				YPL154C	-1.26528
									YNR044W	-1.57768	1.87217e-06	YJL191W	-1.0841	4.89797e-05	YPR001W	-1.58633	0.0167357				YML100W	-1.32546	0.00511606	YOL139C	-1.35334	3.45268e-08	YGL249W	1.51128	0.00795249				YAR053W	1.38914	0.0241788	YOR351C	-6.61327	1.34017e-06				YGR180C	-2.55428	7.93784e-33				YDR218C	-2.15541
									YBR180W	-6.86835	1.9141e-06	YIR039C	-3.32289	4.89797e-05	YJR119C	-1.14051	0.016913				YMR056C	1.07438	0.00513022	YKL009W	-1.09494	3.62633e-08	YLR412C-A	1.80579	0.00852776				YOL091W	1.0466	0.0269789	YKR031C	-1.04	1.42244e-06				YOR049C	-3.37677	8.85866e-33				YHR174W	-1.98273
									YGR027C	-1.39156	2.05232e-06	YBR040W	-3.79513	4.92707e-05	YLL026W	-1.03815	0.0170196				YBR081C	-1.16147	0.00518119	YBR283C	-1.3193	3.74231e-08	YBL039W-B	1.13414	0.00884751				YBR018C	1.24579	0.029271	YJL153C	-3.80162	1.89042e-06				YBR105C	-3.30291	1.23248e-32				YNL146W	-1.25096
									YLL024C	-1.5192	2.11431e-06	YOR178C	-4.07569	5.10325e-05	YER102W	-1.60967	0.0173343				YLR177W	-1.12046	0.00519095	YBR035C	-1.18886	5.18292e-08	YOR237W	1.327	0.00899882				YMR112C	1.44532	0.0363812	YDR293C	-1.01183	2.22482e-06				YJL116C	-3.48019	9.35732e-32				YCL048W-A	-3.06753
									YLR307W	-4.18382	2.18303e-06	YCR073C	-1.12488	5.21956e-05	YDR450W	-1.6538	0.0174833				YDR273W	-2.04124	0.00584153	YLR194C	-1.28227	6.45278e-08	YFR018C	1.05848	0.009203				YPL019C	1.64326	0.0377532	YEL060C	-2.25875	2.22482e-06				YGR279C	-2.38895	1.18606e-31				YBR019C	-1.17253
									YCL074W	-6.86698	2.25751e-06	YMR170C	-1.80091	5.33331e-05	YKR057W	-1.42842	0.0175224				YNR001C	-1.10384	0.00601803	YJL123C	-1.00672	6.92371e-08	YPR158W	1.15647	0.00926256				YDL037C	1.26966	0.0389447	YJL038C	-6.39611	2.40853e-06				YPL154C	-2.55542	1.84481e-30				YDR497C	-1.41868
									YDR536W	-5.29669	2.44227e-06	YMR280C	-3.14575	5.40709e-05	YEL012W	-1.20658	0.0187147				YJR108W	1.21767	0.0060311	YHR030C	-1.35203	6.92371e-08	YOR284W	1.03061	0.00934749				YBR040W	1.47781	0.0392181	YDR258C	-1.69099	2.40928e-06				YJL082W	-2.05696	6.25268e-30				YGR240C	-1.28766
									YKR094C	-1.92717	2.50853e-06	YHL001W	-2.03704	5.42505e-05	YDR421W	-1.07022	0.0192889				YDR295C	-1.16735	0.00604004	YDR002W	-1.24417	8.58152e-08	YMR138W	1.07079	0.00956168				YNR062C	-5.60661	4.41521e-67	YKR015C	-5.99533	2.58238e-06				YMR108W	-2.08474	8.44058e-30				YPL201C	-1.48685
									YLR213C	-1.87323	2.63157e-06	YLR112W	-1.32466	5.4307e-05	YGR094W	-1.33501	0.0197505				YKL042W	-1.21748	0.00610045	YLR372W	-1.42437	9.65195e-08	YLR334C	1.9211	0.00976082				YNR064C	-5.76697	1.63787e-60	YLR194C	-1.06171	2.69866e-06				YGL209W	-2.4977	2.18657e-29				YBR126C	-1.31103
									YNL069C	-1.38563	2.68948e-06	YLL057C	-2.3738	5.69779e-05	YDR295C	-1.02401	0.0199453				YOR134W	-2.91782	0.00610689	YBR248C	-1.44687	1.03883e-07	YJL205C	1.0731	0.0107748				YPL277C	-3.47153	1.92946e-53	YHR199C	-1.20105	3.17087e-06				YLR256W	-1.65619	7.85019e-29				YGR086C	-1.07834
									YNL332W	-7.11212	2.72462e-06	YPL025C	-2.89883	5.72337e-05	YPL106C	-1.28742	0.020046				YDR321W	1.003	0.00665914	YMR255W	-1.12971	1.38585e-07	YDR535C	1.29324	0.0128336				YOL058W	-4.02816	8.78919e-45	YNL112W	-1.11733	3.17087e-06				YKL050C	-2.74343	2.81143e-28				YLR300W	-1.13746
									YDR024W	-3.07595	2.81705e-06	YIL133C	-1.10967	5.78432e-05	YCR028C-A	-1.47904	0.0204238				YER162C	-1.04001	0.00689717	YBR079C	-1.40701	1.70139e-07	YDR343C	3.52778	0.0133319				YLL060C	-2.41859	4.72424e-44	YFL053W	-5.49633	3.60597e-06				YGR032W	-2.42099	8.10397e-28				YIL154C	-1.50654
									YGR248W	-4.64753	3.19683e-06	YLR048W	-1.4352	5.88625e-05	YDR064W	-1.51619	0.0204552				YKL093W	-1.75133	0.00705845	YBR084C-A	-1.48969	2.67722e-07	YGL121C	1.31166	0.0136186				YBR105C	-2.65631	1.76893e-41	YLR162W-A	-2.59334	3.62876e-06				YJL159W	-2.35495	4.7093e-27				YDL137W	-1.22405
									YLR441C	-1.79543	3.23195e-06	YIL113W	-2.93231	6.01226e-05	YPL028W	-1.42056	0.0204552				YOR031W	-1.07072	0.00739746	YBR086C	-1.1042	2.67722e-07	YDL248W	1.2764	0.0173166				YKL050C	-2.65422	8.78662e-41	YHR126C	-7.45084	3.6421e-06				YPR149W	-1.97312	1.4062e-26				YLR445W	-2.09649
									YOR348C	-2.42104	3.536e-06	YGR118W	-1.91057	6.13455e-05	YJL200C	-1.15108	0.0209905				YOR383C	1.13332	0.00739746	YER073W	-1.1644	2.76165e-07	YOL157C	1.49049	0.0187928				YLL039C	-2.77726	1.02855e-37	YDL085W	-5.15937	3.68204e-06				YNL190W	-1.55013	3.63894e-25				YHL041W	-2.34173
									YDL244W	-5.8717	3.62548e-06	YKL180W	-1.44844	6.16888e-05	YEL009C	-1.15645	0.022036				YJL113W	-1.85271	0.00750338	YLR109W	-1.58129	3.07841e-07	YNL195C	1.49181	0.0200945				YNL237W	-4.17066	9.03135e-37	YAL067C	-5.96756	4.23921e-06				YOR152C	-2.51451	5.39827e-25				YIL053W	-1.39123
									YGL262W	-6.89291	3.71085e-06	YGL138C	-6.81961	6.16888e-05	YPR054W	-2.81424	0.0224564				YFL014W	-2.39646	0.00750338	YLR300W	-1.13992	3.21853e-07	YHR093W	2.09845	0.0205444				YEL060C	-2.56975	1.05913e-34	YLR023C	-1.27543	4.2802e-06				YOR032C	-4.14914	8.00841e-25				YHL021C	-1.81678
									YLR388W	-2.65236	3.88588e-06	YDR169C-A	-3.56506	6.42359e-05	YKR098C	-1.00566	0.0229121				YFR054C	1.85908	0.00823004	YKL172W	-1.40295	3.55499e-07	YJR149W	1.1286	0.0219269				YLR237W	-2.47602	1.8309e-33	YLR430W	-1.16977	5.27288e-06				YJL089W	-4.692	1.01228e-24				YDR345C	-1.4863
									YHR174W	-2.68541	4.33486e-06	YER074W	-1.93881	6.55589e-05	YOL155C	-1.43145	0.0232577				YJR156C	-3.16527	0.00844207	YMR102C	-1.23912	3.65037e-07	YGR053C	1.0477	0.0219965				YGR032W	-2.72991	9.78195e-33	YJL116C	-1.53192	5.5262e-06				YEL009C	-2.18355	1.02483e-24				YGL158W	-1.33853
									YLR031W	-4.18634	5.01523e-06	YNL145W	-2.1141	7.29181e-05	YMR217W	-1.29653	0.0232577				YOL047C	-2.12475	0.00848507	YLR431C	-1.89893	4.22111e-07	YAR070C	2.19854	0.0257417				YOL155C	-3.16312	1.47417e-29	YOR063W	-1.20313	5.5262e-06				YEL060C	-1.85898	1.08492e-24				YMR251W	-1.29529
									YGL034C	-3.60073	5.01608e-06	YIL069C	-1.27464	7.29181e-05	YER025W	-1.33181	0.0233193				YDR540C	-1.89535	0.00869558	YLR344W	-1.44924	4.54495e-07	YGR052W	1.12877	0.0262721				YGR224W	-3.2286	7.08183e-28	YPR007C	-5.84121	6.1378e-06				YJL079C	-2.32431	1.66164e-24				YLR110C	-1.81462
									YOR091W	-1.40141	5.60867e-06	YEL026W	-1.09971	7.29181e-05	YDR037W	-1.00836	0.0233666				YBR072C-A	1.34039	0.00874242	YLR398C	-1.35509	4.54495e-07	YHL022C	1.38755	0.0285195				YMR095C	-4.43986	3.8673e-27	YNL210W	-6.69955	7.68049e-06				YMR189W	-2.21684	3.25639e-24				YJR008W	-1.22235
									YLR054C	-4.40619	5.60867e-06	YDR522C	-6.02667	7.51807e-05	YOL047C	-2.82033	0.0235127				YJL105W	-2.52538	0.00914915	YBR052C	-1.07792	5.43202e-07	YJL114W	2.53934	0.0286799				YKL071W	-4.19313	4.08091e-27	YLR256W	-1.56291	8.32445e-06				YIL099W	-4.99418	3.52608e-24				YOR011W-A	-4.71189
									YPL131W	-1.25408	5.64805e-06	YCL001W-A	-3.65432	7.70582e-05	YER138W-A	-2.99421	0.0243564				YLR134W	1.03264	0.00924217	YLR287C-A	-1.90178	6.19398e-07	YHR139C-A	2.4962	0.0299798				YDR216W	-3.33602	1.3615e-26	YHL024W	-3.75016	8.45815e-06				YIL056W	-1.84041	6.23451e-24				YGL055W	-1.50661
									YJL105W	-4.37063	5.87782e-06	YMR217W	-1.35594	7.70582e-05	YML118W	-1.54869	0.0262149				YGR129W	-1.09199	0.00930829	YNL002C	-1.28318	6.25763e-07	YPL189W	1.27754	0.0312345				YJR153W	-3.3901	2.01949e-26	YDR481C	-1.2727	8.45815e-06				YOL119C	-1.58382	1.96282e-23				YKR015C	-2.10438
									YLR029C	-1.10588	6.63612e-06	YBR011C	-1.57392	7.97046e-05	YGR087C	-2.03873	0.0262149				YLR307C-A	-4.80117	0.00954705	YNL064C	-1.24302	7.62051e-07	YER084W	1.08142	0.0375937				YKR103W	-2.22871	1.06879e-25	YGR051C	-7.83898	8.73422e-06				YDR345C	-2.69462	2.10452e-23				YBR011C	-1.4836
									YGL230C	-3.93386	6.81676e-06	YGL263W	-2.83078	8.18781e-05	YPL201C	-2.75041	0.026373				YPL016W	-1.13835	0.0106529	YLR355C	-1.58224	1.02847e-06	YBR018C	1.26138	0.0376302				YCR005C	-1.62353	1.62127e-25	YER129W	-1.31926	9.40338e-06				YGR060W	-1.75855	7.45534e-23				YEL069C	-2.18813
									YGR118W	-1.79131	7.01596e-06	YGL008C	-1.1701	8.53528e-05	YPR145C-A	-2.93886	0.0266725				YLR054C	-2.25253	0.0109285	YDL213C	-1.46231	1.06138e-06	YNR034W-A	1.46623	0.0392193				YGL255W	-2.89423	4.76837e-25	YEL069C	-7.17955	1.05956e-05				YMR291W	-1.60373	1.83645e-22				YNR064C	-1.54812
									YGL008C	-1.29534	7.03552e-06	YER102W	-1.77724	9.29997e-05	YKL180W	-1.65842	0.026807				YCL048W	-2.02599	0.0137129	YPR133C	-1.13001	1.07754e-06	YOL024W	1.60353	0.041375				YJL133C-A	-2.99434	2.65911e-22	YMR018W	-4.7115	1.06846e-05				YNL241C	-2.18148	2.76442e-22				YER187W	-1.59083
									YBR045C	-2.85026	7.42767e-06	YKR015C	-4.73331	0.000111162	YKL133C	-1.26886	0.0270422				YPR201W	1.55065	0.0137129	YBR084W	-1.47619	1.14939e-06	YNR071C	1.08441	0.0416995				YNL208W	-1.93888	5.19207e-22	YLL060C	-2.15831	1.07761e-05				YKL163W	-2.42807	7.67358e-22				YDR050C	-1.29678
									YOL084W	-2.80632	7.77635e-06	YAL016C-B	-7.21441	0.000120189	YNL064C	-1.10012	0.027254				YEL074W	-1.93864	0.0147134	YOL109W	-1.72863	1.14939e-06	YGL263W	1.0578	0.044808				YOL152W	-2.40183	1.55252e-21	YJL133C-A	-2.19448	1.12258e-05				YKL220C	-2.26729	8.45492e-22				YLR296W	-1.5649
									YKL006W	-1.04707	7.85609e-06	YLR287C-A	-1.98385	0.00012193	YDL219W	-1.2883	0.0282171				YML091C	-2.28019	0.0151576	YMR128W	-1.1097	1.25732e-06	YCR018C-A	2.43885	0.0472882				YMR140W	-1.21811	1.7411e-20	YDR171W	-1.48567	1.21933e-05				YBR078W	-1.92522	3.34745e-21				YAL016C-B	-3.30451
									YBL027W	-1.74339	8.0573e-06	YLR212C	-1.54336	0.000128186	YGL034C	-2.26376	0.0295516				YIL099W	-2.14114	0.0162598	YDR060W	-1.11314	1.46515e-06	YOR161C-C	1.16384	0.0482854				YMR302C	-1.56573	1.97777e-20	YIL102C	-8.21763	1.25771e-05				YER145C	-2.38422	4.41126e-21				YLL066W-B	-3.43231
									YER077C	-1.58152	8.73325e-06	YLR004C	-2.45835	0.000137072	YHR179W	-1.29407	0.0300565				YOL154W	-1.04857	0.0162598	YBR221C	-1.10298	1.46781e-06	YNR062C	-4.76484	1.22896e-42				YHR159W	-1.66897	8.90929e-20	YKL161C	-2.00331	1.28734e-05				YHL012W	-3.53309	4.69251e-21				YKL097C	-1.69762
									YBR181C	-2.07999	8.81917e-06	YMR147W	-2.44657	0.000139225	YKL086W	-1.56745	0.0302561				YLR125W	-1.77304	0.0162598	YBR159W	-1.21951	1.51357e-06	YNL237W	-3.71728	8.23875e-35				YGR110W	-2.51164	5.74817e-19	YBR186W	-5.37929	1.63619e-05				YGR086C	-1.77872	5.85228e-21				YOR351C	-1.93633
									YKL032C	-1.06858	9.81671e-06	YMR240C	-1.26616	0.000145225	YLR377C	-3.74447	0.0303381				YHR095W	-2.94045	0.0168367	YDL241W	-1.73114	1.51989e-06	YGL156W	-2.71662	7.67264e-28				YDR329C	-1.21897	5.75561e-19	YMR319C	-1.72882	1.63677e-05				YIR032C	-2.56579	1.25828e-20				YIL111W	-1.72045
									YMR143W	-1.86487	1.03234e-05	YIL170W	-5.04293	0.000145279	YJR009C	-1.77012	0.0311059				YER060W	1.24916	0.0169183	YMR108W	-1.38876	1.51989e-06	YLL039C	-2.00605	3.08134e-19				YGL244W	-1.29876	3.28614e-18	YNL178W	-1.22789	1.78552e-05				YDR033W	-1.89731	2.79271e-20
									YFL050C	-1.51082	1.03728e-05	YOR063W	-1.22887	0.0001461	YMR206W	-2.45834	0.0312881				YGL259W	-2.11246	0.0169723	YDR365C	-1.20446	1.56341e-06	YOR383C	-2.81916	5.5822e-19				YNL124W	-1.2285	8.25876e-18	YDR218C	-5.05049	1.84891e-05				YNR034W-A	-3.19293	3.7768e-20
									YMR242C	-2.20533	1.06014e-05	YIL037C	-4.09292	0.000147892	YFL003C	-1.94543	0.0312881				YJL219W	-4.00696	0.0169723	YGR271C-A	-1.40484	1.56472e-06	YKL050C	-2.51433	5.99638e-19				YNL034W	-4.8415	1.3876e-17	YHR071W	-1.09235	1.8502e-05				YLR110C	-1.9575	4.79188e-20
									YHR039C-A	-2.5767	1.07061e-05	YMR018W	-3.16319	0.00016386	YDR447C	-1.3286	0.0312881				YNR073C	-2.28366	0.0178361	YOR020C	-1.03826	1.80897e-06	YOL155C	-3.16552	8.99848e-19				YLR324W	-1.09486	1.58696e-17	YBR148W	-4.91073	1.88322e-05				YGL012W	-1.80873	1.60758e-19
									YOR162C	-1.15133	1.08593e-05	YIL099W	-3.94941	0.000178089	YJL027C	-3.49954	0.0314384				YDR277C	-2.77456	0.0180891	YLR314C	-1.45139	1.9456e-06	YHL040C	-1.92082	8.39014e-18				YDL239C	-2.21985	4.95662e-17	YNL194C	-5.48017	1.92941e-05				YBR162C	-1.74849	1.92639e-19
									YPR117W	-1.46752	1.23124e-05	YIR034C	-1.33366	0.000180924	YIL122W	-1.04547	0.0322538				YMR240C	-1.05385	0.0183609	YBR078W	-1.29675	2.12617e-06	YNL034W	-4.88246	8.55087e-18				YER040W	-1.38901	9.53324e-17	YGR244C	-1.81147	1.96713e-05				YPR074C	-1.675	4.43443e-19
									YJL216C	-3.52925	1.33317e-05	YDR024W	-1.62627	0.00018401	YDR339C	-1.0167	0.033103				YBR147W	-1.65737	0.0189307	YJR094W-A	-1.58097	2.9477e-06	YOR384W	-3.55651	1.7709e-16				YHR199C	-1.62064	2.95233e-16	YLR184W	-8.20869	2.06444e-05				YPR001W	-2.42625	4.69263e-19
									YEL069C	-5.87081	1.41573e-05	YML024W	-1.02403	0.000189619	YAL016C-B	-5.31627	0.0332038				YDR281C	1.44244	0.0190838	YOR257W	-1.08326	3.12931e-06	YBR105C	-1.83428	3.69488e-16				YLR189C	-1.07441	3.62861e-15	YBL091C	-1.03497	2.0697e-05				YMR205C	-1.6094	9.10788e-19
									YDL083C	-2.00835	1.45777e-05	YGL029W	-1.45451	0.000195335	YEL023C	-1.25486	0.0343932				YDL037C	2.17021	0.019257	YOR383C	-2.83782	3.21133e-06	YGR032W	-1.62003	6.24948e-16				YEL011W	-1.78557	1.24797e-14	YMR128W	-1.00938	2.09542e-05				YIL169C	-3.52445	1.44601e-18
									YOL131W	-8.14909	1.5435e-05	YJL052W	-1.24831	0.000211999	YKR059W	-2.90599	0.034641				YOR268C	1.53368	0.0202816	YER131W	-1.4544	3.23915e-06	YLR419W	-1.83493	1.27932e-14				YIR014W	-1.49994	1.49352e-14	YGR035C	-1.09395	2.20892e-05				YGR282C	-1.604	1.95606e-18
									YMR002W	-1.00939	1.62056e-05	YGL147C	-1.66242	0.000218205	YPL037C	-1.25415	0.0349063				YNL092W	-1.01886	0.0210081	YBR118W	-2.11411	3.36816e-06	YEL060C	-1.69255	6.54939e-13				YOL116W	-1.18452	1.72178e-14	YGL205W	-4.93502	2.29434e-05				YLR249W	-1.83394	3.15052e-18
									YBL050W	-1.04693	1.6669e-05	YNL092W	-2.12396	0.000225256	YKL006W	-1.32853	0.0349063				YER079W	-1.43245	0.0215359	YBR074W	-1.12491	3.63222e-06	YIL046W	-1.7484	1.45877e-12				YML043C	-1.43935	1.93968e-14	YLR249W	-1.22875	2.32948e-05				YNR019W	-1.73634	9.51235e-18
									YMR217W	-1.36771	1.84673e-05	YKL006W	-1.2611	0.000225779	YFR057W	-5.6858	0.0350167				YAL037W	-1.0116	0.022299	YLR309C	-2.06393	3.79948e-06	YNL018C	-3.73473	1.85679e-11				YML109W	-1.30864	4.28145e-14	YDR522C	-6.65956	2.53768e-05				YGR161C	-2.26419	2.96277e-17
									YOR133W	-2.90582	1.84673e-05	YDR063W	-1.06228	0.000228882	YPL171C	-2.36744	0.0353691				YMR321C	-4.95048	0.0227874	YLR333C	-1.9235	3.80702e-06	YDR216W	-2.4711	6.24653e-11				YKL103C	-1.85974	5.83108e-14	YNR019W	-1.48799	2.69498e-05				YBR249C	-1.56718	4.49269e-17
									YHR216W	-1.63086	1.9093e-05	YPL028W	-1.47552	0.000228882	YLR004C	-1.56699	0.0354435				YMR158C-A	-1.52759	0.0229124	YDR293C	-1.13779	3.98589e-06	YGR224W	-2.44897	1.00211e-10				YBR199W	-1.11149	6.82462e-14	YHR125W	-8.01279	3.14216e-05				YNL237W	-2.73801	8.15952e-17
									YBR118W	-4.03531	1.94454e-05	YNL034W	-5.2316	0.000248336	YJL041W	-1.00857	0.0354435				YJL106W	-1.36208	0.0237148	YBR199W	-1.07856	3.99636e-06	YNL065W	-1.56416	1.39505e-10				YGL047W	-1.0958	9.40354e-14	YJR008W	-1.97294	3.14216e-05				YPL048W	-1.521	9.36201e-17
									YGR224W	-2.78622	2.08637e-05	YDR037W	-1.37493	0.000259407	YDL126C	-1.0926	0.0359041				YOR161C-C	1.49214	0.0250453	YBR189W	-1.3672	4.24741e-06	YNL221C	-1.15119	2.56483e-10				YKL086W	-2.44706	1.11939e-13	YIL057C	-5.46401	3.17345e-05				YOR173W	-3.06712	1.35564e-16
									YHR160C	-6.22198	2.14718e-05	YER131W	-1.25273	0.000260919	YMR251W	-1.81577	0.0362556				YJL153C	-1.15722	0.0250671	YBR015C	-1.12222	4.31082e-06	YFL050C	-1.88862	2.71452e-10				YFL050C	-1.74001	2.07325e-13	YLR308W	-7.56387	3.47446e-05				YNR064C	-3.86129	1.37239e-16
									YER111C	-1.51899	2.16394e-05	YHR179W	-1.2843	0.000261535	YJL133C-A	-1.4448	0.0362654				YJL114W	-2.18515	0.0270704	YLR262C-A	-1.79541	4.36356e-06	YLR096W	-1.01793	5.32575e-10				YOR185C	-1.68721	2.40742e-13	YGR248W	-4.83009	3.4855e-05				YOR230W	-1.25844	2.20321e-16
									YDL081C	-2.27387	2.16394e-05	YDL214C	-3.29224	0.000264321	YNL092W	-1.31874	0.0372314				YLR466C-B	-1.3645	0.0280821	YBR164C	-1.66932	4.81841e-06	YHR199C	-1.41585	1.38869e-09				YBL014C	-1.01875	2.40742e-13	YOL132W	-5.86924	3.52559e-05				YDR011W	-1.79551	2.3081e-16
									YHR203C	-1.9453	2.21358e-05	YHR216W	-1.39541	0.000274868	YMR018W	-2.0377	0.0381625				YGR221C	1.03331	0.028186	YOL155C	-2.97682	5.56207e-06	YKL071W	-3.27353	1.78041e-09				YKR011C	-1.40395	2.51766e-13	YDL242W	-6.7273	3.58764e-05				YOR306C	-2.29311	2.56447e-16
									YNL242W	-1.42478	2.21705e-05	YGL249W	-2.99331	0.000279353	YHR087W	-1.55202	0.040052				YOL013W-B	1.20768	0.0286428	YER072W	-1.83386	5.9042e-06	YBR115C	-1.16396	1.97211e-09				YBR295W	-1.34254	2.9979e-13	YPR027C	-5.97705	3.93665e-05				YOL058W	-2.19342	2.6088e-16
									YDL079C	-2.98594	2.22649e-05	YMR107W	-5.58603	0.000279353	YGR148C	-1.09181	0.0403507				YBR148W	-2.12027	0.0301328	YFL004W	-1.25395	6.89903e-06	YBR295W	-1.40019	1.9902e-09				YDL148C	-1.24465	3.09589e-13	YER145C	-1.77431	4.03804e-05				YDL222C	-2.26936	5.84087e-16
									YER102W	-1.6906	2.23876e-05	YMR232W	-2.6753	0.000284491	YHR185C	-4.39553	0.0411101				YGL184C	-1.21091	0.030742	YLR403W	-1.21018	7.89861e-06	YNL125C	-1.30203	2.40717e-09				YHL040C	-2.13451	4.53585e-13	YOL047C	-4.59316	4.29458e-05				YGL008C	-1.80722	1.35239e-15
									YFR016C	-2.74437	2.2436e-05	YER103W	-1.28388	0.000291031	YHR139C	-2.63232	0.0411101				YCR010C	-1.85466	0.030742	YBR256C	-1.22372	7.93426e-06	YGR110W	-2.05857	2.77909e-09				YIR034C	-1.85599	7.02046e-13	YOR237W	-3.55989	4.39623e-05				YLR056W	-1.56459	1.51195e-15
									YOR178C	-3.65901	2.36526e-05	YBR294W	-4.53529	0.000299872	YDL125C	-1.37243	0.0422249				YDL239C	-1.40898	0.0310726	YDL007W	-1.03564	8.68323e-06	YBR043C	-1.0831	4.09712e-09				YML124C	-1.59292	7.41673e-13	YMR323W	-8.26686	4.39623e-05				YAL067C	-4.20908	4.56794e-15
									YFL040W	-5.11189	2.36894e-05	YKR059W	-1.8021	0.000303267	YML074C	-1.075	0.0426024				YMR077C	-1.05195	0.032579	YLR325C	-1.66327	8.85236e-06	YMR058W	-1.63849	4.23479e-09				YFL054C	-1.9031	1.00513e-12	YAL018C	-6.36629	4.45509e-05				YNL268W	-1.4901	5.07373e-15
									YLR448W	-1.10521	2.40896e-05	YPL220W	-2.2335	0.000328146	YNL096C	-1.3467	0.0430121				YDR259C	-1.10312	0.0334772	YMR260C	-1.57604	1.03323e-05	YLR206W	-1.01936	2.33808e-08				YKR039W	-2.04802	1.03026e-12	YKL164C	-1.68192	4.62322e-05				YPR065W	-1.30626	5.08717e-15
									YGL133W	-1.3186	2.47613e-05	YDR542W	-8.78978	0.000330057	YCR105W	-3.21988	0.0445968				YMR095C	-1.76215	0.0336873	YPL266W	-1.41591	1.19741e-05	YIL169C	-2.65137	2.4229e-08				YDR534C	-3.13044	1.67788e-12	YIL169C	-3.93486	4.85146e-05				YLR300W	-1.44464	6.94496e-15
									YPL223C	-3.20203	2.50679e-05	YHR209W	-1.70279	0.000330057	YHR072W-A	-1.07093	0.045509				YOL015W	-1.00091	0.0341676	YLR305C	-1.17338	1.55812e-05	YMR302C	-1.01517	2.53256e-08				YGR186W	-1.07158	2.30206e-12	YJL089W	-5.19268	5.21959e-05				YMR095C	-3.50956	8.31242e-15
									YDR132C	-1.39468	2.70408e-05	YPR054W	-3.52741	0.000334111	YGR059W	-2.10339	0.0462298				YMR107W	-2.85971	0.0348891	YBR058C-A	-1.30488	1.58113e-05	YJR153W	-2.13197	5.67177e-08				YBL050W	-1.0786	3.53329e-12	YDR536W	-5.79304	5.32619e-05				YDR534C	-2.25815	1.118e-14
									YHR141C	-1.76523	2.73646e-05	YPR006C	-1.42435	0.000352125	YDR317W	-1.16091	0.04626				YGR248W	-2.1696	0.0366204	YML074C	-1.09276	1.61691e-05	YDR264C	-1.17953	6.79397e-08				YPR133C	-1.34522	3.73603e-12	YLR341W	-4.96696	5.83373e-05				YLL029W	-1.33656	1.18903e-14
									YBR072W	-2.38196	2.78756e-05	YJR074W	-1.1103	0.000352125	YOL139C	-1.07729	0.0462769				YJR095W	-2.4696	0.0374988	YHR052W	-1.16136	1.83087e-05	YPL277C	-1.9408	1.31324e-07				YKR050W	-1.4517	3.90376e-12	YOL153C	-3.07358	6.10813e-05				YGR281W	-1.63958	1.48428e-14
									YAL061W	-1.42061	2.8128e-05	YOL047C	-3.61574	0.000390239	YLR048W	-1.34147	0.0463672				YKL162C-A	-2.28391	0.0377316	YHR071W	-1.0852	2.07407e-05	YMR128W	-1.12535	2.48619e-07				YNL125C	-1.4429	5.40675e-12	YNL117W	-5.03238	6.1266e-05				YLL005C	-5.13634	1.5875e-14
									YLR267W	-2.74155	3.26497e-05	YDR447C	-1.33357	0.000462583	YLL024C	-1.29058	0.0480508				YMR133W	-2.71783	0.0385726	YBR162C	-1.43364	2.82416e-05	YOR306C	-1.27344	4.25001e-07				YNL079C	-1.02673	5.5859e-12	YPR054W	-5.08554	6.20251e-05				YFR023W	-4.51403	1.5875e-14
									YOR096W	-1.16537	3.29889e-05	YML042W	-1.71174	0.000470496	YDL059C	-1.17974	0.0483315				YDR523C	1.26571	0.0389881	YOL149W	-1.08414	3.36739e-05	YNR064C	-2.56463	4.55788e-07				YPR074W-A	-2.46821	5.5859e-12	YIL055C	-2.33999	6.20721e-05				YGR240C	-1.63223	1.66981e-14
									YLR125W	-3.02148	3.31488e-05	YNL209W	-1.90169	0.000486191	YNL195C	-2.07689	0.0490741				YOL117W	-1.05671	0.0394229	YBR106W	-1.15263	4.06783e-05	YIL154C	-1.60438	7.04344e-07				YJR155W	-1.89157	7.0641e-12	YDR374C	-6.46404	6.59615e-05				YLL026W	-2.03904	2.15038e-14
									YLR185W	-1.87948	3.50468e-05	YOL155C	-1.78207	0.000505732	YGL262W	-4.37622	0.0490741				YLL062C	-1.02804	0.0408891	YLR304C	-1.53613	4.16364e-05	YCR072C	-1.05273	1.1241e-06				YIL154C	-1.65538	8.6607e-12	YHL012W	-4.32302	6.59737e-05				YJL130C	-1.73039	2.33126e-14
									YLR063W	-1.30172	3.52416e-05	YKR097W	-2.22894	0.000565346	YER187W	-2.48975	0.0491538				YER058W	-1.06244	0.0417021	YPR165W	-1.33921	4.17257e-05	YNL124W	-1.1318	1.16511e-06				YLR398C	-1.07564	9.01068e-12	YKL072W	-1.68268	6.99473e-05				YFL039C	-1.66948	2.63956e-14
									YCL001W-A	-3.54895	3.65434e-05	YEL073C	-2.52677	0.0005727	YBR296C	-2.78041	0.0499268				YPL277C	1.28577	0.0433459	YOL120C	-1.16243	4.18948e-05	YPL184C	-1.19606	1.80661e-06				YIL101C	-1.71307	9.57755e-12	YFR015C	-3.28527	7.00503e-05				YPL016W	-2.0627	5.18656e-14
									YHR080C	-1.60836	3.77357e-05	YJL028W	-5.73893	0.000580734							YFL054C	-1.10644	0.043773	YLR388W	-2.13456	4.26525e-05	YKR046C	-1.13386	4.35833e-06				YGR119C	-1.03018	1.03253e-11	YBR289W	-1.11321	7.52717e-05				YOR351C	-5.12333	5.69281e-14
									YNR071C	-3.73061	3.92535e-05	YER111C	-1.36193	0.000596338							YFR026C	-1.09582	0.0460399	YER165W	-1.32504	4.4402e-05	YML124C	-1.43378	5.26333e-06				YBR198C	-1.29726	1.90294e-11	YMR297W	-1.29403	7.70661e-05				YGL253W	-1.63446	5.79195e-14
									YPR145C-A	-4.3972	4.06708e-05	YLL005C	-4.58328	0.000610192										YDR023W	-1.65671	4.5553e-05	YIR034C	-1.10591	5.59277e-06				YIL143C	-1.05148	2.05155e-11	YJR094W-A	-1.23286	7.87148e-05				YGR192C	-1.7294	6.70296e-14
									YMR230W	-1.39864	4.26965e-05	YFR030W	-1.20079	0.000631887										YNL241C	-1.01201	4.58838e-05	YKR103W	-1.52955	9.22232e-06				YNL065W	-1.64812	2.44704e-11	YCL049C	-1.08231	8.20069e-05				YML058W-A	-3.79306	7.05665e-14
									YDR317W	-1.93867	4.32785e-05	YGR092W	-1.06759	0.000661772										YBL071C-B	-2.05875	4.71101e-05	YNL208W	-1.55884	1.49789e-05				YMR191W	-1.40483	3.88838e-11	YLL025W	-3.99647	8.59928e-05				YBR054W	-2.54051	9.78031e-14
									YBL087C	-1.67107	4.42211e-05	YJR009C	-1.49248	0.000689037										YOR382W	-2.36327	4.71101e-05	YLL060C	-1.49352	1.67654e-05				YHR177W	-2.3372	4.29978e-11	YDR273W	-3.52443	8.939e-05				YGL037C	-1.89588	1.15952e-13
									YML024W	-1.05209	4.42681e-05	YNL096C	-1.19651	0.000689134										YDR050C	-1.17951	5.99303e-05	YOR382W	-1.74356	1.70296e-05				YOR178C	-2.57532	5.12977e-11	YMR058W	-1.59572	9.0501e-05				YPR166C	-1.1712	1.17469e-13
									YGL135W	-2.17678	4.46338e-05	YOR237W	-2.38699	0.000709581										YPR132W	-1.4708	6.09931e-05	YDL239C	-1.56654	1.73782e-05				YER103W	-1.35488	6.33687e-11	YDR074W	-1.1251	9.48323e-05				YKL182W	-1.8089	1.40997e-13
									YMR240C	-1.23518	4.50864e-05	YOR027W	-1.46798	0.000727538										YNL084C	-1.39423	6.66917e-05	YCR079W	-1.05179	1.9252e-05				YPR161C	-1.22393	6.63858e-11	YMR250W	-1.26655	9.49478e-05				YBR240C	-1.97167	1.8723e-13
									YOL155C	-1.77463	4.76743e-05	YDR424C	-2.42374	0.000741818										YLR277C	-1.0587	7.31367e-05	YGL026C	-1.51859	3.05884e-05				YNL018C	-3.68193	1.17739e-10	YML118W	-4.27568	9.60629e-05				YNL034W	-5.39207	2.36849e-13
									YLR325C	-1.54661	4.76743e-05	YHR185C	-5.94303	0.000853794										YPL263C	-1.50108	7.33336e-05	YPL154C	-1.16223	3.08328e-05				YPR112C	-1.06686	1.24067e-10	YGR087C	-4.00911	9.9381e-05				YER033C	-2.15915	4.63781e-13
									YKR098C	-1.56947	4.81969e-05	YGR240C	-1.60234	0.00088083										YBR114W	-1.88052	7.49335e-05	YEL011W	-1.0474	3.29944e-05				YPL249C	-1.36724	1.38024e-10	YKR053C	-1.89698	0.000100399				YGR244C	-1.8195	6.56805e-13
									YHR096C	-3.39631	4.83908e-05	YPR027C	-4.50796	0.000898165										YEL071W	-1.05329	7.50513e-05	YDR380W	-1.86024	3.45199e-05				YLR206W	-1.05014	1.50141e-10	YLR081W	-6.64536	0.000102313				YJL163C	-1.59983	7.18115e-13
									YLR333C	-1.4076	4.84371e-05	YLR243W	-1.47018	0.000898165										YGR240C	-1.4923	7.76164e-05	YER164W	-1.25386	3.9407e-05				YMR188C	-1.16372	2.11032e-10	YDR213W	-1.26655	0.000106653				YBR196C	-1.44573	1.05311e-12
									YNL208W	-1.02599	4.88027e-05	YJL177W	-1.40904	0.000922989										YER025W	-1.2452	7.89132e-05	YKL220C	-1.18279	4.49442e-05				YMR311C	-1.33925	2.15568e-10	YPL277C	-3.1933	0.000108548				YEL063C	-1.26681	1.05311e-12
									YOR167C	-1.11616	4.9401e-05	YAR050W	-2.44589	0.00097442										YOR046C	-1.22973	8.108e-05	YKL210W	-1.10574	4.93827e-05				YNL221C	-1.17004	2.38259e-10	YGL158W	-4.97476	0.0001097				YBR067C	-1.35573	1.18305e-12
									YKR057W	-1.12956	5.67067e-05	YGR287C	-2.02384	0.00103131										YFL020C	-5.69745	8.17362e-05	YHR082C	-1.04282	5.58289e-05				YMR128W	-1.19746	2.38259e-10	YKL203C	-1.04697	0.000110055				YLR355C	-1.50725	1.19145e-12
									YPR132W	-2.03307	5.77193e-05	YGR286C	-1.20033	0.00107204										YDR447C	-1.30403	8.39532e-05	YOR375C	-1.28677	6.98362e-05				YPL154C	-1.56254	2.57256e-10	YLR267W	-2.92649	0.000114882				YDR522C	-5.96679	1.80361e-12
									YOR173W	-2.81888	5.87731e-05	YLR262C-A	-2.21051	0.00109635										YDR449C	-1.05881	9.10385e-05	YPR161C	-1.04876	7.5468e-05				YAL013W	-1.54798	2.57261e-10	YNR067C	-1.42514	0.00011862				YNL145W	-1.28175	1.80896e-12
									YIL102C	-7.07454	5.98606e-05	YGL180W	-1.18749	0.0012533										YPL090C	-1.37079	9.30648e-05	YKR050W	-1.26547	8.19634e-05				YDR122W	-1.15858	2.97848e-10	YNL242W	-2.1108	0.000122956				YNL259C	-1.15258	1.80896e-12
									YOR328W	-4.27619	6.11228e-05	YER106W	-5.07498	0.00125804										YNL079C	-1.33148	9.35365e-05	YLR430W	-1.03879	8.46431e-05				YIL046W	-1.49385	3.49462e-10	YBR118W	-2.185	0.000126565				YIL057C	-4.89001	1.99916e-12
									YBR250W	-2.57264	7.10391e-05	YPL150W	-1.01373	0.00127433										YLR292C	-1.32768	9.87623e-05	YPL085W	-1.01019	8.92948e-05				YNR047W	-1.01116	4.05294e-10	YPL154C	-1.45623	0.000129701				YLR304C	-1.24793	2.23784e-12
									YGL147C	-1.43424	7.3632e-05	YLR031W	-3.98968	0.00128301										YGR021W	-1.09682	0.000100131	YKL211C	-1.05124	9.49959e-05				YNL242W	-1.18138	4.38079e-10	YFL054C	-3.59082	0.000131669				YML128C	-1.39966	2.48608e-12
									YMR280C	-2.63853	7.84434e-05	YDR217C	-1.72186	0.00144868										YGL188C-A	-1.60126	0.000100438	YLR237W	-1.02202	0.000103241				YPR184W	-1.26264	6.16231e-10	YPL134C	-2.12681	0.000131669				YKR039W	-1.39659	2.53382e-12
									YIL018W	-1.55659	7.87116e-05	YGR052W	-3.02579	0.0014543										YPL268W	-1.0269	0.000103185	YDL126C	-1.15835	0.000143903				YOR117W	-1.05073	7.05278e-10	YNR071C	-3.75634	0.000133225				YMR195W	-1.47938	3.06085e-12
									YLR296W	-4.21756	8.27289e-05	YDL021W	-1.79785	0.00145716										YHR021C	-1.4532	0.000106873	YAL017W	-1.1481	0.000222794				YLR177W	-1.20829	7.14535e-10	YOR348C	-3.48076	0.000134063				YBR118W	-1.91659	3.64381e-12
									YEL041W	-1.55311	8.73273e-05	YDL130W	-1.6139	0.0014598										YBR017C	-1.40591	0.000107211	YNL112W	-1.04089	0.00023973				YOR384W	-4.36687	7.78951e-10	YJR152W	-2.07537	0.000134276				YMR015C	-1.15932	4.0564e-12
									YNR070W	-2.07884	8.83098e-05	YCL048W	-3.62716	0.00149405										YBR016W	-1.43015	0.000110472	YOL066C	-1.11246	0.000275705				YMR244W	-3.2886	8.85324e-10	YLR345W	-1.8427	0.00014153				YER177W	-1.29562	4.0769e-12
									YOR024W	-5.21183	9.19078e-05	YKR103W	-1.55532	0.00149405										YMR269W	-1.07154	0.000113497	YOR178C	-2.39241	0.000299437				YLR025W	-1.14681	1.48902e-09	YLR013W	-8.18096	0.000145259				YHL035C	-1.64272	4.16676e-12
									YJL052W	-1.15777	9.46055e-05	YNR070W	-2.4919	0.00153488										YOR036W	-1.00616	0.000115772	YCR077C	-1.02527	0.000311948				YOL147C	-1.08718	1.55368e-09	YCR010C	-4.42223	0.000151081				YLR278C	-1.37883	5.29853e-12
									YHL022C	-2.52455	9.68951e-05	YLR273C	-1.74726	0.00155002										YBR056W	-1.09786	0.000118738	YAL012W	-1.06188	0.000331521				YOR389W	-2.07875	1.61405e-09	YJL106W	-3.16056	0.000154789				YKL203C	-1.52013	5.81146e-12
									YIR039C	-3.29726	0.000101509	YLR307W	-3.94657	0.00157538										YOR151C	-1.09728	0.000144677	YDR043C	-1.18852	0.000346822				YOR353C	-1.07736	1.83384e-09	YFR057W	-7.65052	0.000154789				YLL051C	-1.09724	6.82082e-12
									YER074W	-1.51069	0.000102389	YMR319C	-1.14526	0.00161244										YJL034W	-1.17837	0.000151915	YPL111W	-1.05024	0.000485686				YIR027C	-2.4334	2.57688e-09	YJR155W	-2.31712	0.000155735				YMR101C	-4.08221	6.96199e-12
									YER117W	-1.4781	0.000103568	YER123W	-1.54384	0.00168348										YBR081C	-1.53976	0.000191441	YMR244W	-2.49153	0.000694182				YLR095C	-1.02667	4.7913e-09	YHR095W	-8.26915	0.000159101				YMR027W	-1.18712	8.17648e-12
									YBR209W	-4.21459	0.000112903	YKL133C	-1.38067	0.00186792										YDL147W	-1.00201	0.000215217	YMR095C	-1.82207	0.000746347				YOR024W	-3.22239	7.47182e-09	YKL050C	-3.08415	0.000159374				YFL024C	-1.21204	1.01775e-11
									YKL188C	-1.21317	0.000116269	YPR047W	-1.64413	0.00192193										YLR301W	-1.43896	0.000224798	YBR294W	-2.77824	0.000759084				YML054C	-1.26235	7.71301e-09	YLR054C	-4.88369	0.000181559				YLL028W	-1.44422	1.02783e-11
									YIL046W-A	-3.26525	0.000118302	YNL067W	-1.01828	0.00198158										YPL058C	-1.28423	0.000224798	YCR051W	-1.10747	0.000779534				YDR299W	-1.11729	7.74475e-09	YLR307W	-4.29703	0.000190924				YBR001C	-1.21883	1.17173e-11
									YGR214W	-1.33803	0.000120453	YJL105W	-3.32875	0.00209713										YMR074C	-1.0297	0.000234567	YOL152W	-1.1442	0.000817188				YBR012C	-1.95629	7.8049e-09	YPL016W	-1.19704	0.0001956				YDR264C	-1.18441	1.2246e-11
									YCL018W	-8.40003	0.000122329	YLR054C	-3.58404	0.00210485										YBR261C	-1.21477	0.000239034	YMR276W	-1.08698	0.00099277				YOR113W	-1.34034	1.0348e-08	YPL223C	-4.42112	0.000195877				YDR259C	-2.47548	1.31284e-11
									YGR110W	-2.70717	0.000124626	YJL217W	-1.81105	0.00216731										YGR118W	-1.24649	0.000246953	YER145C	-1.10513	0.00099277				YDL154W	-1.02615	1.12142e-08	YLR111W	-5.51603	0.000199007				YGL206C	-1.55079	1.47118e-11
									YHR156C	-1.66885	0.000134532	YGL251C	-1.21669	0.00232075										YIL078W	-1.2735	0.000250706	YLR403W	-1.04452	0.00105324				YBR294W	-3.34446	1.6972e-08	YBR209W	-4.8896	0.000201861				YPR015C	-2.77208	1.54348e-11
									YHL001W	-1.69324	0.00013475	YJL027C	-4.29952	0.00236374										YER117W	-1.31424	0.000252172	YOR113W	-1.06077	0.00108482				YMR275C	-1.04724	2.00113e-08	YLR080W	-2.42372	0.000209769				YNR067C	-1.02985	1.89328e-11
									YGL031C	-1.5319	0.000138577	YGR066C	-3.57104	0.00259676										YJR150C	-4.49785	0.000252172	YFL054C	-1.28608	0.00139735				YER164W	-1.18963	2.60229e-08	YKL221W	-5.01306	0.000218154				YBR126C	-1.4713	2.31429e-11
									YEL070W	-4.57963	0.00015406	YDL241W	-1.59155	0.00267235										YBR072W	-1.79748	0.000278703	YFL053W	-1.81481	0.00147264				YGL250W	-1.34003	3.36047e-08	YDR420W	-1.13268	0.000220409				YCR061W	-1.45743	2.79938e-11
									YEL049W	-4.9226	0.000158725	YER175C	-1.79504	0.00269745										YHR215W	-3.38016	0.000281726	YPL249C	-1.10213	0.0014847				YBR043C	-1.16786	3.38978e-08	YKL031W	-5.17003	0.000224296				YKL103C	-1.60251	2.83256e-11
									YBR048W	-1.49736	0.000162048	YFR026C	-1.95054	0.00284472										YJL012C	-2.17236	0.000296442	YER129W	-1.07578	0.00182871				YOR285W	-1.21666	3.49497e-08	YBR240C	-3.17342	0.000228198				YOL047C	-3.59071	2.83256e-11
									YHR210C	-1.7213	0.000162487	YFL053W	-3.13048	0.00291584										YLR273C	-1.42876	0.000334245	YGL022W	-1.03677	0.0024793				YDL144C	-1.2025	4.08927e-08	YMR206W	-3.72512	0.000235839				YJL153C	-2.95907	2.99006e-11
									YHR021C	-1.55151	0.000166085	YPR200C	-2.65605	0.00308243										YEL009C	-1.30417	0.000334245	YGR204W	-1.05919	0.00276955				YDL132W	-1.08857	5.12983e-08	YMR207C	-1.95307	0.000238253				YLR273C	-1.88051	3.08291e-11
									YMR118C	-5.30398	0.000170115	YER096W	-3.04346	0.00323673										YDR258C	-1.26092	0.000341878	YJR155W	-1.17641	0.00283191				YAL017W	-1.36755	6.17332e-08	YNL015W	-1.90317	0.000240286				YPL231W	-1.47058	4.25371e-11
									YBR011C	-1.20307	0.000175147	YML118W	-2.13748	0.00335567										YKL161C	-1.13482	0.000367658	YJL153C	-1.39328	0.00301959				YBR053C	-1.12805	8.29171e-08	YKR050W	-1.49917	0.000244727				YIL123W	-1.48423	4.67061e-11
									YLR023C	-4.04289	0.000187754	YKL086W	-3.22578	0.00346899										YBR198C	-1.63985	0.000369999	YPR074C	-1.0394	0.00384039				YOL047C	-2.48943	1.92538e-07	YMR133W	-4.5537	0.000244727				YHR177W	-2.43372	5.12349e-11
									YPL189W	-2.62419	0.00019774	YNL083W	-1.27043	0.00348244										YBR068C	-1.54709	0.000380814	YMR251W	-1.52758	0.00419846				YOL052C-A	-2.07777	1.93562e-07	YDR030C	-1.49724	0.000250282				YLR430W	-1.3552	7.16855e-11
									YKL129C	-1.10951	0.000203712	YPL249C	-1.74299	0.00359748										YGL054C	-1.05001	0.000384718	YGL234W	-1.05217	0.00490943				YDR258C	-1.27799	2.18403e-07	YDL239C	-3.03558	0.000260815				YBR294W	-4.46053	7.16855e-11
									YIR028W	-3.11094	0.000204369	YMR017W	-4.75582	0.00380542										YGR211W	-1.07233	0.000398142	YML054C	-1.17544	0.00605003				YOR383C	-3.84639	3.21064e-07	YEL011W	-1.44965	0.000260815				YJR045C	-1.56603	7.16855e-11
									YGR148C	-1.41028	0.000221737	YKR050W	-1.20766	0.00383039										YAL053W	-1.12315	0.000400292	YFL014W	-2.13349	0.00683857				YFL056C	-1.19912	3.23455e-07	YBR010W	-1.29515	0.000269809				YCL064C	-1.27857	7.24815e-11
									YOL161C	-8.70923	0.000223187	YGR087C	-2.71921	0.00410337										YGR085C	-1.18737	0.000410313	YPL209C	-1.06094	0.00804709				YPL184C	-1.06399	3.31715e-07	YPL221W	-1.44618	0.00027731				YNL251C	-1.16967	7.80195e-11
									YGR085C	-1.36592	0.00022495	YDR227W	-1.19192	0.00413502										YBR247C	-1.7628	0.000432149	YKL103C	-1.0119	0.00913239				YKL010C	-1.01818	3.59757e-07	YPR002W	-3.38024	0.000281281				YOR187W	-1.26936	8.36614e-11
									YER162C	-1.26097	0.000234823	YFL054C	-2.11723	0.00482941										YER102W	-1.51199	0.000447182	YIR027C	-1.40273	0.00988915				YER060W-A	-1.70385	3.99007e-07	YDR216W	-2.48697	0.000286591				YER062C	-1.5346	8.43405e-11
									YOR182C	-1.89704	0.000240533	YHR126C	-5.17056	0.00518319										YIL133C	-1.18842	0.000452005	YEL049W	-2.63742	0.0255694				YMR190C	-1.24312	4.25317e-07	YBR180W	-4.74516	0.000299589				YPR007C	-3.82812	8.77484e-11
									YML109W	-1.18958	0.000241274	YIL073C	-2.2992	0.00541844										YGR061C	-1.14172	0.000454894	YDR258C	-1.05748	0.0275511				YPL104W	-1.09065	5.32589e-07	YNL200C	-1.2383	0.000299623				YPL250C	-1.50509	9.68027e-11
									YDL126C	-1.26418	0.000243939	YMR133W	-3.77911	0.00563103										YER056C-A	-1.30926	0.000496476	YJR005C-A	-3.60873	0.0281031				YKL220C	-1.26114	5.65919e-07	YMR082C	-7.79114	0.000300916				YPL230W	-2.23221	9.7526e-11
									YPL160W	-1.6986	0.000252095	YMR158C-A	-3.86101	0.00632004										YLR029C	-1.36062	0.00051079	YLL017W	-1.21359	0.0486869				YLR309C	-1.0297	9.65756e-07	YDR471W	-1.12184	0.000340442				YDR158W	-1.2485	1.11572e-10
									YGR052W	-2.46357	0.000271453	YDR317W	-1.72652	0.00656012										YPL272C	-3.12266	0.000518636							YCR014C	-1.25372	1.03007e-06	YEL009C	-1.28979	0.000349454				YJR155W	-2.10067	1.44117e-10
									YKL133C	-1.492	0.000287025	YPR184W	-1.11568	0.00662917										YGR020C	-1.28399	0.000520527							YIL169C	-2.09398	1.36142e-06	YPR014C	-6.18826	0.000359661				YGL157W	-1.48754	1.56921e-10
									YGR066C	-4.12706	0.000287025	YPL272C	-1.71486	0.00724311										YDR224C	-1.36535	0.000532749							YKL078W	-1.00697	1.51166e-06	YIL011W	-2.16544	0.00036145				YLL040C	-1.63412	1.6634e-10
									YKL180W	-1.01458	0.000299975	YCR105W	-3.68545	0.00728342										YKL054C	-1.23585	0.000538691							YKL031W	-2.6285	1.54701e-06	YIR032C	-1.82754	0.000370805				YLR044C	-1.43186	2.13359e-10
									YIR042C	-1.6214	0.00032195	YIL169C	-2.71973	0.00730555										YLR025W	-1.04749	0.000540926							YDR001C	-1.034	1.80317e-06	YAL039C	-1.14401	0.000374546				YLR013W	-7.81155	2.13843e-10
									YJR095W	-4.26981	0.000323176	YOR011W-A	-6.99042	0.00785324										YPR145C-A	-3.90396	0.000548755							YJL212C	-1.02402	2.19453e-06	YFL040W	-4.77424	0.000379279				YIL121W	-1.53481	3.1054e-10
									YKL221W	-3.60447	0.000324341	YOL091W	-2.18213	0.00798467										YGL029W	-1.45543	0.000562948							YAL028W	-1.22344	2.82946e-06	YEL041W	-2.4205	0.000385399				YJL158C	-1.11933	3.3261e-10
									YDR025W	-1.61507	0.000327545	YDR218C	-3.56812	0.0082152										YNL069C	-1.17691	0.000583873							YKL074C	-1.03725	2.90347e-06	YLR377C	-5.55895	0.000393302				YGL205W	-2.94446	3.50157e-10
									YCL048W	-4.45995	0.000329158	YIL055C	-1.53612	0.00832179										YLR260W	-1.07381	0.000585375							YNL039W	-1.02683	3.00867e-06	YKR102W	-3.26589	0.000400072				YER054C	-3.0619	3.63958e-10
									YJR119C	-1.22893	0.000333194	YDL243C	-1.66061	0.00832179										YDR129C	-1.08145	0.000611939							YOR032C	-2.02951	3.338e-06	YMR017W	-5.65033	0.000424833				YGR110W	-2.49729	3.90218e-10
									YCR073C	-1.02516	0.000336318	YJL138C	-1.21278	0.00859615										YIL138C	-1.16536	0.000620716							YGR129W	-1.41664	3.40139e-06	YJL216C	-3.29461	0.000426982				YKR102W	-2.29167	4.33063e-10
									YAL066W	-5.88216	0.000340182	YAL067C	-3.3532	0.00872499										YOL108C	-1.5188	0.000623315							YCR072C	-1.01286	5.42342e-06	YPR117W	-2.08065	0.000428153				YPR159W	-1.0192	4.71628e-10
									YNL034W	-5.10107	0.000343758	YGL205W	-2.42396	0.0088407										YKL117W	-1.10495	0.000631222							YKR046C	-1.3852	5.47795e-06	YBL044W	-5.6424	0.000450109				YDR099W	-1.35166	4.98122e-10
									YOL121C	-1.58717	0.000370247	YHL022C	-2.11075	0.00921868										YHR007C	-1.01216	0.000661854							YDL230W	-1.01143	7.37788e-06	YBR019C	-4.48524	0.000453469				YKL093W	-2.39486	6.10134e-10
									YPL171C	-2.85325	0.000370247	YDL061C	-1.14319	0.00950081										YBR055C	-1.2974	0.00068741							YOR010C	-1.44819	7.38724e-06	YIR028W	-4.84965	0.000453517				YAL018C	-4.88158	7.48103e-10
									YJL103C	-1.81561	0.000370247	YMR062C	-1.04331	0.00952364										YGR034W	-1.50498	0.000695334							YGL026C	-1.08492	8.28503e-06	YHR139C	-3.83517	0.000456161				YLR403W	-1.47668	9.49127e-10
									YGR034W	-1.89508	0.000376337	YIL122W	-1.27887	0.00969615										YNL121C	-1.41155	0.000732558							YGR009C	-1.03385	9.95949e-06	YMR244W	-4.70628	0.000476542				YBR186W	-3.48869	9.59797e-10
									YJL177W	-1.41644	0.000384731	YER091C	-1.38735	0.0100254										YJR005C-A	-5.58514	0.000747293							YPL230W	-1.28786	1.03812e-05	YGR236C	-4.65761	0.00051704				YDR446W	-5.60344	9.81211e-10
									YLR308W	-5.9692	0.000393575	YBR250W	-1.98266	0.0100254										YLR278C	-1.04224	0.000748175							YDR043C	-1.34962	1.04836e-05	YLR301W	-1.10474	0.000521435				YAL017W	-1.56596	9.93916e-10
									YFL019C	-6.17461	0.000401052	YOR091W	-1.27417	0.0104924										YLL026W	-1.54238	0.000772755							YMR090W	-1.03066	1.07464e-05	YCL073C	-7.58007	0.000521435				YGR161W-C	-1.80303	1.02136e-09
									YER091C	-1.64763	0.000406496	YLR307C-A	-6.23191	0.0105139										YGR094W	-1.42512	0.000775285							YBR231C	-1.24517	1.08767e-05	YCR105W	-5.31234	0.000525459				YJR095W	-5.09409	1.02158e-09
									YGL185C	-1.25174	0.000407513	YAL046C	-1.36619	0.0105724										YBL028C	-1.21456	0.000801438							YMR280C	-1.44676	1.08877e-05	YGL180W	-1.65984	0.000525459				YPL082C	-1.04947	1.03179e-09
									YDL248W	-2.23822	0.000431335	YPL062W	-1.27251	0.0114831										YBR130C	-1.17171	0.000828756							YJL153C	-1.47716	1.1006e-05	YER091C-A	-6.67644	0.00055635				YNR016C	-1.50047	1.03505e-09
									YOL118C	-4.54426	0.000432707	YLR070C	-1.79268	0.0116111										YMR143W	-1.30657	0.000833313							YPL055C	-1.25761	1.11734e-05	YPL248C	-2.5132	0.000563885				YOR134W	-4.1896	1.09366e-09
									YER056C-A	-1.697	0.000433319	YKR105C	-6.18596	0.0128696										YER074W	-1.24853	0.000848125							YOL066C	-1.05029	1.1671e-05	YER033C	-1.72021	0.00056876				YGR189C	-1.17143	1.23199e-09
									YBR147W	-2.64931	0.000440735	YNL312W	-1.01929	0.0129237										YLR249W	-1.43346	0.000873713							YDR343C	-4.53137	1.19794e-05	YGL029W	-2.38399	0.000589098				YFR015C	-2.45536	1.28341e-09
									YML026C	-1.34918	0.000452182	YDR099W	-1.45001	0.012999										YER111C	-1.08701	0.000878188							YFL053W	-2.09458	1.23976e-05	YGR066C	-4.3326	0.000610967				YKL070W	-4.85325	1.50353e-09
									YKR076W	-2.35741	0.000457713	YKL031W	-3.42359	0.0136716										YER133W	-1.04175	0.00088278							YOR031W	-1.31729	1.48241e-05	YDL244W	-6.15922	0.000621247				YDR135C	-1.04538	1.56392e-09
									YPR095C	-1.04425	0.000459302	YLR306W	-1.80713	0.0138373										YJR145C	-1.56747	0.00088278							YDL218W	-1.02935	1.58181e-05	YFL050C	-1.98094	0.000621247				YLR307W	-3.71266	1.70658e-09
									YPR002W	-2.36058	0.000493473	YHR014W	-3.68007	0.0144405										YMR242C	-1.41222	0.000911103							YCL025C	-1.04215	1.93659e-05	YIL070C	-1.05615	0.000624446				YDL244W	-4.40536	1.91812e-09
									YNL209W	-1.63861	0.000506982	YMR321C	-6.81184	0.0144855										YGL253W	-1.2197	0.000998172							YGR066C	-2.3538	2.05452e-05	YLR142W	-1.36761	0.000634585				YDR170C	-1.3945	2.43946e-09
									YMR062C	-1.25879	0.000508404	YML066C	-3.19406	0.0147072										YJL159W	-1.14113	0.00102217							YJL043W	-1.95219	4.3811e-05	YER011W	-1.69404	0.000668631				YPL248C	-1.56084	2.61113e-09
									YOL091W	-2.60504	0.000536116	YGL259W	-3.87838	0.015148										YDR062W	-1.01886	0.00109725							YMR058W	-1.17462	5.44866e-05	YDL197C	-1.66875	0.00067672				YEL011W	-1.5117	2.61113e-09
									YPL153C	-1.23904	0.000544119	YER128W	-1.1225	0.0171605										YKL142W	-1.16502	0.00111913							YMR251W	-2.50445	5.49294e-05	YMR118C	-6.08088	0.000688828				YPL184C	-1.48318	3.09437e-09
									YLL057C	-2.36214	0.000560872	YLL026W	-1.47422	0.0179067										YGL189C	-1.73703	0.00116248							YBR289W	-1.19132	5.58578e-05	YMR321C	-8.66654	0.000696672				YKR103W	-1.54814	3.64257e-09
									YDR217C	-1.66719	0.000560872	YHR087W	-1.55819	0.018564										YDL184C	-1.22155	0.00118051							YHL012W	-1.54435	6.02093e-05	YMR320W	-2.03933	0.000732331				YDR216W	-3.38325	3.85762e-09
									YIL171W	-7.3077	0.000572009	YDR259C	-1.86205	0.0187106										YHR039C-A	-1.11603	0.00124043							YOR173W	-1.49168	6.17862e-05	YGR184C	-1.0047	0.000751947				YGR248W	-3.30683	4.85177e-09
									YGL249W	-2.13272	0.000595882	YAR047C	-3.33147	0.0192066										YBL072C	-1.57485	0.00126875							YLL017W	-1.88971	6.77413e-05	YHL033C	-1.09047	0.000791259				YPR184W	-1.84075	5.29517e-09
									YDL219W	-1.19509	0.000597133	YLR260W	-1.39212	0.0202107										YPL160W	-1.42146	0.00127644							YKL023W	-1.0236	8.60373e-05	YIL170W	-5.77686	0.000811344				YKL008C	-1.24732	5.90895e-09
									YPR064W	-3.74819	0.000624091	YIL111W	-1.04559	0.0207497										YDL081C	-1.10547	0.00130627							YLR125W	-1.44538	8.60499e-05	YGL121C	-2.00251	0.000824247				YOR392W	-10.2569	6.62013e-09
									YPL090C	-1.48901	0.000625814	YPL230W	-1.74057	0.0210099										YKR059W	-1.54482	0.00133841							YOR382W	-2.53738	0.000119949	YOR388C	-8.04792	0.000857477				YDR457W	-1.36094	6.65864e-09
									YLR287C-A	-1.48454	0.000629643	YNL195C	-2.35701	0.0211465										YDR471W	-1.26125	0.00133841							YHL024W	-1.27995	0.000145793	YHR185C	-6.35564	0.000861212				YPL054W	-2.77174	6.65864e-09
									YIL111W	-1.38676	0.000641529	YNL194C	-3.42608	0.021268										YDR158W	-1.42037	0.00139082							YLL026W	-1.07108	0.000165012	YCL048W	-4.40845	0.000866715				YOL084W	-1.74719	7.48368e-09
									YGR240C	-1.30524	0.000655465	YER053C-A	-2.02406	0.0219551										YBR231C	-2.30452	0.00142612							YHR096C	-1.8331	0.000165897	YOL131W	-8.50153	0.000875877				YER052C	-1.05693	7.52727e-09
									YMR251W	-2.52637	0.000673899	YIR028W	-2.6636	0.0224517										YHR010W	-1.38831	0.00148706							YJL144W	-1.35228	0.000215999	YGR273C	-6.07876	0.000891662				YGR143W	-1.58029	7.9994e-09
									YKL001C	-1.07255	0.00071344	YPL147W	-1.47517	0.0226766										YBR073W	-1.34759	0.00150293							YMR227C	-1.08492	0.000386056	YBR093C	-2.67715	0.000907386				YGR035C	-1.64465	8.18612e-09
									YER096W	-3.24625	0.000746085	YNL208W	-1.13994	0.0228517										YLR452C	-1.37314	0.00156393							YML100W	-1.12134	0.000395179	YDL194W	-1.88778	0.000907386				YOR063W	-1.38901	8.18612e-09
									YNL210W	-4.43645	0.000751244	YJL041W	-1.08991	0.0230459										YLR167W	-1.16835	0.00174167							YLL005C	-2.65144	0.000453813	YCL048W-A	-5.32677	0.00100497				YGR203W	-1.54732	9.05182e-09
									YBR148W	-3.24783	0.000757528	YER188W	-1.63522	0.0232612										YGL245W	-1.18986	0.00176667							YOR306C	-1.20032	0.000468453	YBR269C	-2.21275	0.00101587				YNL015W	-1.45486	9.09763e-09
									YIR032C	-1.37379	0.000770791	YKL095W	-1.1134	0.0233053										YKR057W	-1.03939	0.00184211							YPL209C	-1.05673	0.000664781	YBL072C	-1.0779	0.00103663				YLR134W	-1.78135	9.5376e-09
									YKR097W	-2.06223	0.000770791	YGR248W	-2.99671	0.024426										YOR182C	-1.02373	0.00188991							YIL113W	-1.50253	0.000791149	YNR068C	-2.54018	0.001055				YBR081C	-1.25411	1.06865e-08
									YNL018C	-3.88612	0.000783306	YLR411W	-1.55081	0.0246481										YGR027C	-1.15467	0.00188991							YER054C	-1.37213	0.000867837	YLR070C	-3.08833	0.00107041				YJR153W	-2.42122	1.15743e-08
									YOR312C	-1.15207	0.000798196	YDR034C-A	-4.50397	0.0252249										YNL162W	-1.05541	0.00201485							YFL052W	-2.51895	0.0010543	YNR073C	-5.12343	0.0010708				YPR156C	-1.09321	1.21593e-08
									YPR167C	-1.29507	0.000805131	YCL074W	-4.55629	0.0255376										YLR185W	-1.22627	0.0020344							YAL065C	-5.09073	0.00105783	YBL033C	-1.13796	0.00111151				YMR018W	-2.87705	1.23144e-08
									YNL312W	-1.00887	0.000805131	YDR085C	-1.14802	0.0264163										YBR080C	-1.05317	0.0020944							YDL214C	-1.38097	0.00105799	YPL021W	-6.613	0.00111774				YMR017W	-4.57413	1.30961e-08
									YGL158W	-3.40845	0.000811203	YNL117W	-2.62973	0.0277719										YOL104C	-1.95086	0.00218481							YFR026C	-1.00187	0.00111743	YGR059W	-3.61503	0.00118184				YMR133W	-3.76475	1.43704e-08
									YIL170W	-5.03383	0.000811203	YLR308W	-5.11252	0.02835										YGL031C	-1.27056	0.0021987							YJL116C	-1.10774	0.00113273	YOR011W	-1.78933	0.00120498				YDR074W	-1.54792	1.82033e-08
									YGR180C	-1.13048	0.00082279	YOR024W	-3.63621	0.029639										YML026C	-1.13989	0.00221641							YLR323C	-1.02966	0.00114075	YKL220C	-1.51085	0.00120498				YDR536W	-4.38325	1.83625e-08
									YFL020C	-4.49737	0.000908095	YCR060W	-1.18436	0.0300141										YBR158W	-1.07851	0.00224839							YJR005C-A	-4.42792	0.00115527	YHR080C	-1.63633	0.00121815				YNL242W	-1.4775	1.95483e-08
									YLR070C	-2.00291	0.000921542	YNR073C	-3.37847	0.030931										YER091C	-1.92445	0.00229115							YCL048W	-1.76335	0.00222033	YHR087W	-2.11252	0.00125302				YHR211W	-1.33733	2.10067e-08
									YMR147W	-2.00178	0.000955369	YKL071W	-2.90612	0.0322931										YPL079W	-1.43398	0.00239519							YNR001W-A	-1.45684	0.00253687	YDR486C	-1.79121	0.00125302				YDL171C	-1.30712	2.11906e-08
									YML118W	-2.13109	0.000993942	YGR161C	-1.59026	0.0326693										YOR153W	-1.07711	0.00259038							YKL093W	-1.21466	0.00269468	YDL214C	-3.90429	0.00125302				YGL121C	-2.11723	2.28709e-08
									YBR020W	-1.66906	0.00107078	YOR348C	-2.06211	0.0332799										YDL082W	-1.02516	0.00266087							YIL173W	-3.28762	0.00273577	YOL154W	-3.23921	0.00128797				YPL223C	-3.05263	2.49717e-08
									YPL077C	-1.08703	0.00120259	YPR001W	-1.55313	0.0334607										YOR007C	-1.23794	0.00266087							YAL067C	-1.62265	0.00308517	YBR045C	-3.4318	0.00129351				YPL085W	-1.23261	2.6374e-08
									YLR411W	-1.99448	0.00120259	YGL185C	-1.00791	0.0341068										YML024W	-1.18118	0.00272423							YIL066C	-1.00013	0.00361771	YDL222C	-2.34976	0.00132236				YKL164C	-1.19606	2.70325e-08
									YBL108W	-7.93368	0.00120507	YKR102W	-1.62568	0.03471										YKL164C	-1.0955	0.0027287							YGL262W	-3.32319	0.00437353	YOR032C	-4.14123	0.00134348				YGR079W	-1.51547	2.9133e-08
									YDR385W	-1.9896	0.0013248	YGR110W	-1.82015	0.0359896										YHR082C	-1.08459	0.0027287							YKR104W	-1.2271	0.00459955	YHL035C	-1.05426	0.0013758				YLR137W	-1.51364	3.43715e-08
									YPL054W	-2.7059	0.0013248	YAR020C	-2.91981	0.0368006										YIL051C	-1.25817	0.00281709							YFL014W	-1.65208	0.00560694	YNL067W	-1.0026	0.00139997				YPL221W	-1.27282	3.97965e-08
									YOR214C	-4.36973	0.0013367	YDR472W	-1.17122	0.0371269										YBR149W	-1.19103	0.00284313							YFR015C	-1.06065	0.00622378	YPL121C	-7.66406	0.00140546				YER175C	-1.23782	4.5636e-08
									YGR273C	-5.81341	0.00134361	YPL189W	-1.82013	0.0372787										YMR229C	-1.19339	0.0029593							YBR045C	-1.03046	0.00745313	YGR180C	-1.68697	0.00157611				YCR010C	-3.45672	4.5636e-08
									YML054C	-1.50204	0.00135205	YJL052C-A	-4.6732	0.0375568										YHR141C	-1.05359	0.00296545							YEL069C	-2.86107	0.00831679	YGL134W	-1.48929	0.00158295				YPR002W	-1.94415	4.8837e-08
									YDL125C	-1.50286	0.00135205	YDL210W	-2.00281	0.0375568										YMR251W	-2.70657	0.00300458							YAR020C	-1.75116	0.014391	YNL196C	-5.25328	0.00158755				YPR201W	-2.2373	5.11745e-08
									YNL145W	-1.5031	0.00135279	YDR216W	-1.38326	0.0376347										YGR192C	-1.55441	0.00306134							YOR376W	-2.51271	0.0147536	YNL160W	-1.72475	0.00159761				YMR162C	-1.34191	5.5976e-08
									YIL032C	-5.72431	0.00137366	YJL106W	-1.55496	0.0378731										YGR218W	-1.09034	0.00307592							YNL196C	-2.03532	0.0179037	YNL092W	-3.00496	0.00163602				YER165W	-1.17045	5.7235e-08
									YIL113W	-2.33284	0.00150467	YDL240C-A	-4.66111	0.0383168										YJL105W	-3.61565	0.00315518							YKL070W	-2.37542	0.0187388	YLR004C	-3.12124	0.00167329				YLR308W	-5.64775	6.23475e-08
									YPL025C	-2.37913	0.00150732	YBR285W	-3.04463	0.0393345										YKR094C	-1.18417	0.00315518							YNR073C	-1.68744	0.0202871	YMR101C	-3.74438	0.00168106				YOL132W	-3.60604	6.26839e-08
									YPL061W	-1.59448	0.00150732	YMR182W-A	-1.47379	0.0394545										YDR086C	-1.08496	0.0032622							YGL158W	-1.49338	0.0221745	YLR425W	-1.1416	0.00172454				YDR171W	-1.98966	6.47552e-08
									YNL092W	-2.2722	0.0016162	YPL054W	-2.20886	0.0401798										YLR106C	-1.1965	0.00350002							YLR307C-A	-3.28801	0.0222219	YPR064W	-4.2315	0.00175496				YBL017C	-1.08958	6.49048e-08
									YOR032C	-2.8207	0.0016405	YLR178C	-1.26767	0.0401798										YHR174W	-1.28091	0.00358799							YGL263W	-1.08248	0.0227679	YER045C	-1.27373	0.00180464				YKL086W	-2.3052	7.22651e-08
									YKL074C	-1.17154	0.00172385	YLR013W	-6.6779	0.0405429										YJL138C	-1.37801	0.00379653							YJR150C	-2.23869	0.0271086	YHL041W	-4.94082	0.00180962				YOL004W	-1.09456	7.58725e-08
									YGR053C	-2.01962	0.00184528	YGR088W	-1.03408	0.0407163										YDL126C	-1.07271	0.00383519							YBR072W	-1.05266	0.029271	YKL097C	-4.313	0.00184755				YDL055C	-1.04651	7.82798e-08
									YGR287C	-1.84458	0.00188338	YER066W	-1.53337	0.0408504										YBR036C	-1.30782	0.00384352							YKR105C	-3.50557	0.0304957	YLL056C	-2.7969	0.00193367				YEL049W	-4.20222	7.99542e-08
									YFL056C	-1.27095	0.00191825	YMR206W	-2.48381	0.0410524										YHR203C	-1.29534	0.00390619							YOL164W-A	-2.3406	0.0370187	YIL113W	-2.55463	0.00197117				YGR107W	-1.21514	8.41469e-08
									YCR105W	-3.76291	0.00199677	YDL194W	-1.08	0.0412048										YMR230W	-1.12327	0.00398162							YMR323W	-3.16396	0.0370187	YOR113W	-1.16324	0.00201119				YER158C	-1.66835	8.44617e-08
									YJL106W	-1.84785	0.00199677	YGL184C	-1.58537	0.0418299										YLL024C	-1.20722	0.00399414							YPR002W	-1.08574	0.0408164	YAL067W-A	-10.6894	0.00202249				YOR374W	-1.46431	8.75536e-08
									YDR450W	-1.18073	0.00200109	YGL089C	-3.22619	0.0437356										YLR110C	-1.03719	0.00411514							YLR346C	-1.35787	0.0468944	YGL189C	-1.08412	0.00203961				YMR232W	-2.57485	9.73124e-08
									YPL079W	-1.10023	0.00202446	YGL230C	-2.91372	0.0440265										YOR027W	-1.41808	0.00411514							YMR321C	-3.6484	0.0498888	YPR006C	-2.0798	0.00203961				YDL199C	-1.34272	1.00965e-07
									YCR010C	-3.27983	0.00207456	YJL216C	-1.5813	0.0445283										YOR312C	-1.17759	0.00417742										YNL034W	-4.93201	0.00214158				YDR034W-B	-2.54283	1.02753e-07
									YLR037C	-1.97977	0.00208436	YLR264C-A	-2.04853	0.0445283										YOR133W	-1.69894	0.00433212										YCR102W-A	-7.17057	0.00220528				YPR145W	-1.09416	1.15673e-07
									YFR030W	-1.06715	0.0022592	YDL039C	-1.03382	0.0448206										YLR460C	-1.40901	0.00436432										YCR104W	-6.69342	0.00220528				YBR296C	-3.35153	1.1704e-07
									YGR243W	-1.69217	0.00227895	YDR282C	-1.44255	0.0454508										YOR096W	-1.3485	0.00442212										YNL018C	-4.64611	0.00220982				YDR034C-A	-4.95736	1.19197e-07
									YLR012C	-8.18449	0.0023086	YPR007C	-3.21145	0.0454741										YBR115C	-1.06327	0.00446968										YHR015W	-3.85417	0.0022608				YDL126C	-1.10301	1.4467e-07
									YDR169C-A	-2.88415	0.00243435	YLL062C	-1.34535	0.0464945										YLR323C	-1.01217	0.0045151										YOL084W	-2.75025	0.00227478				YNL112W	-1.38036	1.49564e-07
									YOR185C	-1.34113	0.00246685	YMR315W-A	-3.44061	0.0471795										YML063W	-1.19954	0.00454608										YPL147W	-2.71041	0.00228382				YNR068C	-2.58966	1.79244e-07
									YOR190W	-2.27394	0.00249321	YDL085W	-2.26779	0.0479512										YBR101C	-1.22661	0.00455657										YGL089C	-4.66143	0.00236655				YMR244W	-3.2604	1.79244e-07
									YLR134W	-1.36608	0.00250098	YNR071C	-1.80247	0.047981										YFL039C	-1.1278	0.00456984										YKL093W	-3.77904	0.00237095				YNL134C	-1.39706	1.83878e-07
									YER060W-A	-2.15138	0.00251606	YDR380W	-1.30284	0.0480807										YOL117W	-1.08392	0.00479789										YCR014C	-1.98411	0.00242563				YGL138C	-5.13846	1.89335e-07
									YLL056C	-2.35249	0.00265974	YEL069C	-4.21264	0.048976										YOL130W	-1.4621	0.00483068										YDR403W	-2.95501	0.00243395				YGR224W	-2.34559	1.9688e-07
									YBR296C	-3.38315	0.00277964	YPL061W	-1.16719	0.0493171										YBL027W	-1.17983	0.00484012										YBR299W	-4.75663	0.00244248				YBR241C	-1.3856	1.98151e-07
									YDL059C	-1.24851	0.00282268													YKL056C	-1.11317	0.00486486										YBR018C	-3.64838	0.00244614				YIR039C	-2.51979	2.17116e-07
									YPR133C	-1.08329	0.00286433													YLR044C	-1.28938	0.00488496										YJL027C	-5.13815	0.00246644				YMR207C	-1.32278	2.23757e-07
									YPR157W	-1.78713	0.00302334													YDL133C-A	-1.53502	0.00488636										YDR281C	-2.0777	0.00256506				YOR376W	-4.27546	2.39964e-07
									YLR013W	-7.01051	0.00305108													YDR099W	-1.44233	0.0050142										YDL184C	-2.01353	0.00256506				YDR001C	-1.04945	2.42135e-07
									YCR015C	-1.4753	0.0032043													YHR063C	-1.03292	0.00510011										YDL079C	-3.3373	0.00261854				YKR015C	-4.07466	2.52007e-07
									YOR027W	-1.0242	0.00321063													YJR123W	-1.18432	0.00523889										YPL249C	-1.06652	0.00269127				YMR280C	-2.40322	2.64633e-07
									YER131W	-1.08023	0.00346708													YJL080C	-1.21996	0.00526815										YER178W	-1.00561	0.00284234				YGR273C	-5.34888	2.71477e-07
									YLR212C	-1.17697	0.00350839													YLR048W	-1.043	0.00537799										YCL074W	-5.49778	0.00290192				YJR004C	-1.60654	2.71952e-07
									YLR460C	-2.02883	0.00363462													YDR168W	-1.02428	0.00568421										YOR177C	-3.42621	0.00291506				YER178W	-1.01687	2.74675e-07
									YHR007C	-1.01793	0.00368359													YBR060C	-1.07039	0.00581668										YER158C	-1.18802	0.00329547				YKR097W	-1.75422	2.82296e-07
									YOL156W	-5.21841	0.00368403													YJL130C	-1.23267	0.00591793										YLR388W	-1.21925	0.00340548				YGR067C	-1.3624	2.88916e-07
									YNL117W	-2.70261	0.00372691													YBR085C-A	-1.2809	0.00647319										YOR376W	-4.73833	0.00344654				YKL010C	-1.0749	2.99235e-07
									YGL138C	-5.49617	0.00375054													YBR245C	-1.26302	0.00650633										YBL088C	-1.49428	0.00356907				YLR341W	-3.73338	2.99235e-07
									YGR144W	-2.60973	0.00381685													YBR093C	-2.04534	0.00661415										YLR461W	-9.26025	0.00374593				YHR174W	-1.16354	3.88392e-07
									YOR134W	-3.88927	0.00384185													YHL015W	-1.28842	0.0067434										YPL110C	-1.36266	0.00388142				YLR054C	-3.32055	3.90947e-07
									YOL047C	-3.1005	0.00388832													YGL173C	-1.15079	0.00678307										YOL118C	-4.73364	0.00389009				YKL104C	-1.11786	4.04675e-07
									YLL026W	-1.05967	0.00396214													YDL061C	-1.08305	0.00715783										YPR201W	-2.84727	0.00393747				YBR148W	-3.04327	4.49626e-07
									YDL222C	-1.66301	0.00416614													YBR200W	-1.09584	0.00763404										YKR097W	-2.30842	0.00410243				YLR310C	-1.01313	5.0666e-07
									YNR073C	-4.06296	0.00434777													YKL182W	-1.37379	0.00943288										YBR040W	-3.95962	0.00412427				YER164W	-1.29947	5.51828e-07
									YGL263W	-1.94501	0.00437255													YOR063W	-1.01712	0.00954285										YMR189W	-1.02043	0.00421546				YMR219W	-1.43047	5.53702e-07
									YPR014C	-4.39586	0.00441518													YDL083C	-1.0568	0.0100938										YKL218C	-1.57769	0.00422946				YNL192W	-1.13715	5.65385e-07
									YMR017W	-4.83036	0.0044909													YDR071C	-1.02294	0.0110974										YMR232W	-3.28131	0.004262				YER185W	-1.64217	5.82412e-07
									YKL103C	-1.1561	0.00463892													YCL021W-A	-1.47935	0.0116684										YPL201C	-3.76127	0.00430063				YPR117W	-1.50566	6.23013e-07
									YHR095W	-3.6428	0.00475961													YGL195W	-1.26998	0.0116839										YEL023C	-2.49587	0.00450453				YDR403W	-2.13117	6.77674e-07
									YOL117W	-1.09443	0.00476621													YKR095W	-1.12163	0.0118345										YNR034W-A	-2.61463	0.0045868				YGR218W	-1.06357	6.81641e-07
									YOR285W	-1.26676	0.00482614													YBR038W	-1.00587	0.0118956										YER060W-A	-3.52644	0.00470211				YPL058C	-1.27507	6.94789e-07
									YMR206W	-2.58373	0.00497985													YJR045C	-1.03459	0.0120046										YMR141C	-1.48899	0.00476277				YGR184C	-1.27179	7.99004e-07
									YBR128C	-1.34634	0.00498082													YML072C	-1.18085	0.0121457										YDR024W	-1.84949	0.00476277				YBR068C	-1.11206	8.81384e-07
									YDL194W	-1.05606	0.00498884													YPL106C	-1.15682	0.0122899										YOL019W-A	-4.7753	0.00485256				YJL105W	-3.33109	9.67737e-07
									YPL201C	-3.11396	0.00518839													YBR268W	-1.0606	0.0124302										YOR162C	-1.26548	0.00485613				YOL109W	-1.19719	1.0083e-06
									YPL249C	-1.05882	0.00536959													YPL273W	-1.26626	0.0124898										YHR209W	-1.77792	0.00500304				YDL214C	-2.72363	1.00856e-06
									YMR047C	-1.0039	0.00555839													YGL008C	-1.13068	0.0126068										YAL053W	-1.15888	0.00500364				YHR071W	-1.14942	1.13492e-06
									YIL122W	-1.20767	0.00577263													YIL018W	-1.00772	0.0127041										YGL034C	-3.95689	0.00516757				YOR031W	-1.67346	1.14e-06
									YGL184C	-1.8706	0.00588934													YNL007C	-1.23587	0.0133759										YHR211W	-1.92942	0.00521313				YIL170W	-4.17451	1.35327e-06
									YML042W	-1.35218	0.00611375													YBR059C	-1.16627	0.0134679										YIL073C	-2.70305	0.00527732				YKL221W	-3.11909	1.49944e-06
									YPL220W	-2.10307	0.00639002													YBR071W	-1.18875	0.0135023										YDR097C	-1.08679	0.00528092				YBR128C	-1.23882	1.598e-06
									YOL132W	-3.36114	0.00657496													YPL037C	-1.06829	0.0135207										YOR386W	-2.15167	0.00560464				YPL201C	-2.82079	1.68566e-06
									YOL164W-A	-5.03383	0.00677838													YNL209W	-1.00244	0.0139341										YPR001W	-2.81153	0.00573034				YBL043W	-1.53018	2.1012e-06
									YDR447C	-1.12221	0.00686933													YGR214W	-1.05916	0.0147872										YER150W	-1.53332	0.00574292				YFR057W	-6.25828	2.25462e-06
									YDR295C	-1.04206	0.00689122													YBR020W	-1.63757	0.0151403										YBR147W	-2.86127	0.00574292				YDL194W	-1.1155	2.33137e-06
									YLL017W	-2.61996	0.00689122													YOL125W	-1.05892	0.0160568										YJL028W	-4.82106	0.00582921				YDL133C-A	-1.14087	2.33676e-06
									YGR129W	-1.25004	0.00777831													YNR016C	-1.20117	0.0163704										YKR007W	-1.05164	0.00583949				YBR020W	-1.60856	2.89073e-06
									YML058W-A	-2.71836	0.00790934													YBR239C	-1.05095	0.0164328										YJL012C	-1.71573	0.00584846				YMR070W	-1.07814	2.91672e-06
									YJR151C	-1.37887	0.00790934													YGR180C	-1.00386	0.0165532										YOL157C	-2.32215	0.0060024				YDR293C	-1.11266	2.94677e-06
									YHR139C	-2.99447	0.00800924													YBR173C	-1.1943	0.0182425										YBR020W	-1.51899	0.00602123				YCR014C	-1.4514	2.94929e-06
									YBL043W	-2.23218	0.00820737													YOL119C	-1.18217	0.019127										YLL030C	-6.5353	0.00635839				YNL194C	-3.16349	3.04355e-06
									YCR001W	-3.48271	0.00830065													YBR102C	-1.21135	0.0195757										YHR215W	-3.39657	0.00638707				YAL061W	-1.06807	3.06231e-06
									YBR054W	-2.14056	0.00879278													YDR216W	-1.73742	0.0198996										YNR072W	-4.32335	0.00654096				YKL109W	-1.32236	3.2189e-06
									YDL021W	-1.40148	0.00879427													YMR291W	-1.15801	0.0209435										YFL033C	-1.10602	0.00659583				YFL053W	-2.89947	3.22163e-06
									YOR236W	-1.55926	0.00895674													YDR170C	-1.08422	0.021739										YFL003C	-3.45103	0.00665615				YLR267W	-1.5707	3.59375e-06
									YML066C	-2.83097	0.0092407													YDR326C	-1.00092	0.0220007										YFR012W-A	-6.16652	0.00679144				YAL066W	-4.60059	3.60001e-06
									YLL062C	-1.71646	0.00925026													YBR160W	-1.25087	0.0225357										YAL037W	-2.24615	0.00710168				YIL073C	-2.11933	3.60001e-06
									YGL146C	-1.16451	0.00949288													YBR237W	-1.35299	0.024867										YKR104W	-3.07513	0.00713072				YIL037C	-2.81969	3.67793e-06
									YKL093W	-2.23818	0.00949288													YLL048C	-1.0505	0.025862										YER187W	-4.62502	0.00739195				YFL011W	-3.32066	3.9886e-06
									YIL134C-A	-1.39238	0.00953515													YOL105C	-1.17008	0.0269888										YDL039C	-1.23892	0.00742517				YNL092W	-1.56765	4.31538e-06
									YDL139C	-1.47257	0.00984287													YGL147C	-1.01009	0.0270748										YHR014W	-3.85239	0.00786267				YKR076W	-1.62435	4.32343e-06
									YCR014C	-1.40659	0.00995774													YDR385W	-1.10726	0.0271651										YLR260W	-1.59892	0.00801952				YER103W	-1.17406	4.54397e-06
									YJL027C	-3.88346	0.00995985													YPL274W	-1.1066	0.0272219										YGR224W	-3.27793	0.00821843				YKR046C	-1.0998	4.67624e-06
									YCR102C	-2.17571	0.00997666													YPL240C	-1.32574	0.0273878										YLR037C	-2.47945	0.00847749				YJR151C	-1.28121	5.35514e-06
									YKR050W	-1.17034	0.0101293													YLR081W	-1.61266	0.0279088										YIR027C	-3.58992	0.00849897				YCL026C-A	-2.99203	5.80667e-06
									YDR099W	-1.44812	0.0102925													YDR040C	-1.07536	0.0281416										YOR236W	-2.09592	0.00865065				YEL069C	-4.43579	6.53981e-06
									YLL030C	-5.3905	0.0105251													YMR017W	-2.89657	0.0283545										YLR296W	-3.94113	0.00872764				YGR088W	-1.18901	7.43004e-06
									YPL147W	-1.3964	0.0105251													YBR202W	-1.07329	0.0292546										YMR107W	-4.16751	0.00878835				YGR287C	-1.97275	7.58747e-06
									YGR035W-A	-4.51184	0.0105912													YBR282W	-1.00611	0.0327382										YDL223C	-1.50935	0.00888127				YJR150C	-2.92625	7.84949e-06
									YIL134W	-1.07176	0.0108019													YPL019C	-3.01545	0.0329985										YKL217W	-2.22307	0.00895001				YDR385W	-1.17227	8.06013e-06
									YGL098W	-1.13336	0.0108019													YGL206C	-1.16538	0.0348281										YHR132W-A	-1.72979	0.00897995				YPR014C	-5.02368	8.52511e-06
									YJR150C	-3.06133	0.0110616													YOR384W	-2.40085	0.0366419										YOR192C	-1.77826	0.00932325				YBR180W	-3.16801	8.5597e-06
									YJR004C	-1.17087	0.0111992													YBR095C	-1.00114	0.0375535										YAL062W	-1.40062	0.00932325				YCR024C	-1.39441	8.82004e-06
									YDR223W	-1.72624	0.0114689													YER138W-A	-1.29631	0.0402187										YIR039C	-2.6242	0.00932325				YKL096W	-1.24122	9.60438e-06
									YOR343C	-2.10496	0.0122169													YOL118C	-2.48822	0.0421321										YLR403W	-1.13267	0.00949975				YFL016C	-1.06556	9.79726e-06
									YDR534C	-1.7361	0.0124322													YDR534C	-1.62937	0.0441486										YHL023C	-1.06572	0.00952715				YMR107W	-3.8167	1.02306e-05
									YCL073C	-5.83629	0.012957																									YOR391C	-6.83878	0.00986455				YHR209W	-1.23005	1.10315e-05
									YGR070W	-1.21286	0.0129692																									YKR098C	-1.65512	0.0103973				YPR027C	-3.41119	1.12498e-05
									YER044C-A	-1.15101	0.0135016																									YGR067C	-2.41444	0.0103973				YGR087C	-2.36798	1.27303e-05
									YGR059W	-2.47589	0.0136952																									YAL063C-A	-5.1922	0.0104099				YKL161C	-1.43602	1.29025e-05
									YKL162C-A	-3.62836	0.013897																									YFR017C	-2.01948	0.0108606				YIR028W	-2.46797	1.31094e-05
									YAL064W-B	-2.44893	0.0139272																									YGL260W	-8.33878	0.0108606				YDL239C	-2.02614	1.32203e-05
									YJR005C-A	-5.34317	0.0148539																									YDR223W	-2.59768	0.0113158				YLR307C-A	-5.23624	1.36797e-05
									YAL046C	-1.30475	0.0150091																									YGL249W	-2.3842	0.0113337				YNL336W	-2.57872	1.37301e-05
									YMR081C	-1.37635	0.0153117																									YER106W	-4.5829	0.0115108				YAL040C	-1.00572	1.50308e-05
									YCL069W	-7.08607	0.0162842																									YOL117W	-1.77058	0.0118691				YFL019C	-4.46603	1.57785e-05
									YKL071W	-2.65864	0.0169669																									YKL086W	-1.88294	0.0119024				YFL040W	-3.25776	1.70087e-05
									YLR323C	-1.14597	0.0171448																									YGR070W	-1.61935	0.0120495				YLR178C	-1.59323	1.73486e-05
									YCR102W-A	-5.19642	0.0175071																									YLR109W	-1.21858	0.0121233				YLR454W	-1.24985	1.89994e-05
									YOR050C	-1.59625	0.0192382																									YOL052C-A	-2.37697	0.012228				YHL033C	-1.05167	1.92166e-05
									YBR285W	-3.19904	0.0193482																									YKR049C	-1.15834	0.0129878				YDL079C	-2.20283	2.10465e-05
									YLR329W	-2.08988	0.0199103																									YIL037C	-3.18638	0.0130666				YCL001W-A	-2.4822	2.23815e-05
									YER138W-A	-1.15536	0.020239																									YPL150W	-1.11727	0.0149659				YBL033C	-1.26316	2.26412e-05
									YMR207C	-1.16179	0.0205552																									YMR291W	-1.0387	0.0151917				YCR001W	-3.14146	2.52444e-05
									YER188W	-1.52541	0.0209805																									YJR153W	-2.78647	0.0153685				YLR004C	-1.49363	2.52828e-05
									YIL073C	-1.71996	0.0215649																									YPL189W	-2.5222	0.01579				YKL054C	-1.00369	2.5332e-05
									YOL153C	-1.31207	0.0215776																									YKL224C	-8.09014	0.0159552				YPL189W	-1.91123	2.5877e-05
									YGL229C	-1.15795	0.0216699																									YLR030W	-2.55699	0.0160286				YAL037W	-1.63767	2.75148e-05
									YHR044C	-1.00643	0.0219855																									YGR088W	-1.54992	0.0168994				YDR218C	-3.30315	2.76426e-05
									YLR080W	-1.17449	0.022343																									YAL064W	-5.09273	0.0169249				YOR177C	-2.46257	2.97454e-05
									YLR425W	-1.21603	0.0230111																									YCR102C	-3.2366	0.016937				YOR124C	-1.02642	3.02403e-05
									YLL066W-B	-5.26444	0.0230798																									YGL174W	-1.90356	0.0181566				YDR273W	-1.89716	3.02403e-05
									YDR216W	-1.37089	0.0233309																									YDR259C	-2.24624	0.0181801				YFL066C	-8.31206	3.10789e-05
									YCR097W-A	-6.29607	0.02379																									YER179W	-2.86263	0.0181801				YFL054C	-1.75227	3.2639e-05
									YKR103W	-1.18153	0.0247818																									YBR009C	-1.0926	0.0184489				YAR009C	-1.84352	3.32264e-05
									YJL113W	-2.18185	0.0248906																									YER184C	-1.39029	0.0190795				YIL122W	-1.13404	3.50435e-05
									YDR472W	-1.12526	0.0263881																									YPR145C-A	-3.25147	0.0204599				YGR144W	-2.27976	3.61871e-05
									YLL060C	-1.05179	0.0267913																									YGR144W	-2.72107	0.0216019				YPL021W	-4.97831	4.02988e-05
									YLR111W	-3.67816	0.0272254																									YOR190W	-2.03672	0.0217108				YGL173C	-1.03231	4.19216e-05
									YKR059W	-1.78149	0.0275065																									YDL245C	-6.93312	0.0222537				YGL184C	-1.46329	4.23325e-05
									YHR054C	-2.41376	0.0277823																									YHR160C	-4.97504	0.0225149				YKR005C	-1.54383	4.9241e-05
									YPL134C	-1.38699	0.0278993																									YOL166C	-7.04362	0.0226301				YHR139C	-2.67802	5.00562e-05
									YDL218W	-1.08822	0.0292611																									YLR460C	-2.61536	0.0231132				YLR425W	-1.08748	5.21998e-05
									YGL183C	-3.19048	0.0292611																									YGL184C	-2.13175	0.0235682				YLL030C	-4.96566	5.50525e-05
									YIL055C	-1.25624	0.0300587																									YOR387C	-3.42891	0.0237404				YDR374C	-3.85104	5.71757e-05
									YLR142W	-1.37764	0.0309862																									YJR047C	-1.77592	0.0238122				YDL048C	-1.25687	5.84845e-05
									YKR005C	-1.52583	0.0314781																									YPL025C	-2.52563	0.0246229				YMR206W	-2.3046	5.95898e-05
									YKL187C	-1.15532	0.0315228																									YEL070W	-4.21802	0.0247437				YBR019C	-2.30079	6.31021e-05
									YFL012W	-3.4606	0.0317861																									YJL214W	-2.61779	0.0248575				YKL051W	-1.00559	6.41019e-05
									YMR082C	-6.47806	0.0323461																									YPR047W	-1.40199	0.0267229				YBR045C	-2.05543	7.64025e-05
									YML054C-A	-5.53471	0.0329822																									YBR241C	-1.12027	0.0267229				YAL016C-B	-5.3496	7.64922e-05
									YOL166C	-6.3407	0.0339375																									YHR140W	-1.26494	0.0268695				YPL025C	-1.68009	7.79523e-05
									YPR006C	-1.34539	0.0340988																									YKR103W	-1.99204	0.0279932				YLR012C	-7.23614	8.22856e-05
									YPL021W	-5.14958	0.0341742																									YLL017W	-2.74349	0.0288792				YER106W	-3.95781	9.55863e-05
									YOR031W	-1.63957	0.0343218																									YDR085C	-1.95196	0.0289745				YCL074W	-4.30447	9.67368e-05
									YDL243C	-1.20203	0.0343472																									YML054C-A	-5.30032	0.0291223				YOR027W	-1.02021	0.000101067
									YIR019C	-1.23596	0.0344597																									YER096W	-2.74615	0.0294716				YHR185C	-4.65999	0.000102928
									YHR087W	-1.35289	0.0349318																									YJL043W	-2.84069	0.0298623				YJL106W	-1.87576	0.000103203
									YMR182W-A	-1.18172	0.0349318																									YCL026C-A	-2.99218	0.0304684				YGL007C-A	-1.35558	0.000104312
									YMR242W-A	-4.96333	0.0366866																									YOL015W	-1.64906	0.0319145				YGL180W	-1.17668	0.000106283
									YGL089C	-3.07091	0.0368808																									YDR317W	-2.32738	0.0319631				YOR011W-A	-6.19777	0.000110936
									YDL199C	-1.6829	0.0375576																									YBR298C-A	-7.5283	0.0334965				YLR377C	-3.19017	0.000111992
									YMR170C	-1.17133	0.0376025																									YOR156C	-1.2412	0.0339966				YFR017C	-1.83019	0.000123423
									YLR004C	-1.61408	0.0385167																									YMR160W	-1.13906	0.0339966				YIL102C	-5.63805	0.000136356
									YDR070C	-2.29663	0.0385167																									YLR361C-A	-1.56014	0.034054				YER060W-A	-2.12335	0.000148501
									YPL209C	-1.15906	0.0391112																									YOL156W	-4.58358	0.0341196				YHR087W	-1.4072	0.000150303
									YLR334C	-2.33991	0.0411726																									YOR381W-A	-4.03761	0.0354407				YPL277C	-1.60108	0.000171184
									YDL061C	-1.20454	0.0416517																									YLR445W	-3.11617	0.0359277				YML118W	-1.49656	0.000197264
									YGL258W	-1.8867	0.0423199																									YDL210W	-2.29777	0.036946				YER111C	-1.21356	0.000197264
									YDL210W	-1.47672	0.042414																									YPL219W	-1.25223	0.0371673				YMR247W-A	-5.51316	0.000208911
									YOL154W	-1.42245	0.0425493																									YHL044W	-2.06874	0.0381858				YBR250W	-1.44448	0.000216541
									YDR523C	-1.60032	0.0426044																									YFL059W	-3.61016	0.0382521				YNR062C	-2.32584	0.000217083
									YNL237W	-1.68226	0.0429048																									YLR343W	-2.59199	0.0390832				YCR102W-A	-5.00248	0.000218751
									YKR105C	-5.45013	0.0438796																									YGR292W	-3.78174	0.0391941				YOL154W	-1.43531	0.000230677
									YBR062C	-1.34423	0.0439511																									YNR062C	-3.47859	0.039387				YFL020C	-3.37383	0.000257424
									YHL048C-A	-8.80749	0.0439511																									YER162C	-1.21339	0.0410866				YPL121C	-5.50702	0.000271188
									YOR384W	-1.82397	0.0447347																									YOL091W	-1.92872	0.041389				YBR285W	-2.84594	0.000271558
									YLR461W	-7.28444	0.0463165																									YOL161C	-6.95084	0.0415896				YHR095W	-2.78726	0.000272165
																																				YMR111C	-1.30838	0.0418582				YHR014W	-3.15404	0.000280697
																																				YDR285W	-1.95642	0.0421235				YLR126C	-1.00543	0.000339
																																				YKR005C	-1.78117	0.0429539				YOL153C	-1.13865	0.000344672
																																				YBR046C	-1.13801	0.0440718				YOR192C	-1.25741	0.000344672
																																				YFL063W	-5.73984	0.0450524				YKR104W	-1.98479	0.000390841
																																				YGL251C	-1.47904	0.0453834				YLR151C	-1.09892	0.000402256
																																				YKL133C	-1.14484	0.0460755				YGL158W	-2.41521	0.000405086
																																				YOR031W	-1.3824	0.0460887				YML054C-A	-5.32958	0.00040554
																																				YFR032C	-2.72731	0.0460887				YPR054W	-2.45664	0.000415015
																																				YLR307C-A	-5.18291	0.0494512				YFL062W	-3.41937	0.000415266
																																				YJL103C	-1.50972	0.0494512				YKL217W	-1.51277	0.000416756
																																										YJL216C	-1.76558	0.000419611
																																										YGR236C	-3.0205	0.000427137
																																										YAR050W	-1.79787	0.000499705
																																										YNL117W	-1.99332	0.00050193
																																										YNL196C	-2.99489	0.000515576
																																										YLR296W	-2.86715	0.00051749
																																										YNL210W	-3.43545	0.000533089
																																										YGR066C	-2.6501	0.000533089
																																										YHR126C	-3.93707	0.00053668
																																										YHR080C	-1.05253	0.00061929
																																										YNL173C	-1.044	0.000630266
																																										YOL001W	-1.04616	0.000656968
																																										YJL027C	-2.93244	0.000658389
																																										YLR411W	-1.15468	0.000716971
																																										YOL131W	-5.90354	0.000735355
																																										YJL103C	-1.3371	0.000775349
																																										YEL023C	-1.26717	0.000796897
																																										YPL147W	-1.18255	0.000815204
																																										YLR334C	-1.9473	0.000921692
																																										YML091C	-1.15841	0.000941236
																																										YJR152W	-1.07273	0.000976406
																																										YPL171C	-1.62931	0.00102102
																																										YNL146W	-1.43026	0.00103193
																																										YBR147W	-1.41034	0.00104862
																																										YBR299W	-2.5111	0.00105342
																																										YER028C	-1.74598	0.00107154
																																										YHR160C	-3.67704	0.00112901
																																										YPR064W	-2.40905	0.00114191
																																										YMR158C-A	-1.81571	0.00114644
																																										YAL063C	-2.12348	0.00116519
																																										YBL071C-B	-1.13529	0.00124708
																																										YGL007W	-1.38381	0.00134357
																																										YNR072W	-3.15476	0.00139366
																																										YIL012W	-2.9982	0.00142672
																																										YAL065C	-5.79851	0.00146857
																																										YGR035W-A	-3.59743	0.00150412
																																										YIR027C	-1.62175	0.00164033
																																										YMR056C	-1.01801	0.00164091
																																										YPR145C-A	-2.44457	0.00174088
																																										YLR184W	-4.67884	0.00182765
																																										YAL063C-A	-3.74208	0.00183882
																																										YMR082C	-5.67489	0.00185502
																																										YBR018C	-1.68962	0.00187863
																																										YLR081W	-1.67524	0.00190995
																																										YDR018C	-2.08382	0.00216116
																																										YDR085C	-1.0434	0.00228613
																																										YDR277C	-2.28041	0.00228613
																																										YBL108W	-5.94507	0.00235517
																																										YGL262W	-3.97985	0.00246078
																																										YKR105C	-4.50414	0.0025913
																																										YLR445W	-2.38649	0.00261292
																																										YIL011W	-1.0108	0.00272398
																																										YJL038C	-2.77549	0.00275322
																																										YHR094C	-1.05387	0.00277378
																																										YGL230C	-2.15802	0.00278022
																																										YDL085W	-1.65117	0.00278371
																																										YNL067W-A	-3.8221	0.00284049
																																										YJL028W	-2.94779	0.00286436
																																										YBR209W	-2.61039	0.00301563
																																										YHR125W	-4.1801	0.00315465
																																										YMR271C	-1.06354	0.0032162
																																										YHL041W	-3.21091	0.0032405
																																										YHR015W	-1.70316	0.00337908
																																										YKL097C	-2.69458	0.00352804
																																										YIL171W	-4.71267	0.00357246
																																										YLR111W	-2.87875	0.00368983
																																										YOR190W	-1.36233	0.00380246
																																										YFL050C	-1.13573	0.00390877
																																										YER096W	-1.81551	0.00412351
																																										YLR343W	-2.30018	0.00443195
																																										YFL058W	-6.22834	0.00452687
																																										YFL052W	-1.48427	0.00476542
																																										YLR460C	-1.22406	0.00481656
																																										YDL007C-A	-5.44775	0.00508967
																																										YCR015C	-1.43239	0.00541018
																																										YCL073C	-4.25405	0.00543371
																																										YOL152W	-1.14026	0.00556372
																																										YPL130W	-4.05986	0.00570487
																																										YIL054W	-1.20769	0.00654858
																																										YLL025W	-1.23554	0.00710584
																																										YMR320W	-1.18487	0.00731696
																																										YAL067W-A	-7.04574	0.00741873
																																										YOR391C	-4.47585	0.00750318
																																										YOR214C	-2.58268	0.0075645
																																										YAR047C	-2.32221	0.00777173
																																										YIR019C	-1.13975	0.00788323
																																										YNL093W	-1.62075	0.00798938
																																										YGR059W	-1.80933	0.00817134
																																										YHR079C-A	-3.50001	0.00850201
																																										YFL003C	-1.21629	0.00878455
																																										YMR118C	-2.97899	0.00923412
																																										YOL160W	-2.76074	0.00931325
																																										YLL056C	-1.00518	0.0107132
																																										YGL249W	-1.0981	0.0107627
																																										YER091C-A	-3.22584	0.0127501
																																										YDL210W	-1.11312	0.0133391
																																										YBR200W-A	-2.93918	0.0137841
																																										YLR461W	-5.60669	0.0141852
																																										YEL070W	-2.55794	0.0151941
																																										YNR001W-A	-1.56	0.0154521
																																										YJL219W	-3.50142	0.0168999
																																										YGL258W-A	-3.3536	0.0186341
																																										YFL059W	-2.13851	0.0194118
																																										YOL157C	-1.3188	0.0204224
																																										YIR013C	-1.92087	0.0208047
																																										YMR321C	-4.76883	0.0208788
																																										YCR105W	-2.30973	0.0209074
																																										YER181C	-1.25661	0.0233427
																																										YJR156C	-2.63232	0.0235317
																																										YCL048W-A	-2.73922	0.0243803
																																										YJL052C-A	-3.45522	0.0252995
																																										YJL218W	-1.62635	0.0266598
																																										YFL012W	-2.039	0.0271401
																																										YGL089C	-2.11638	0.0274654
																																										YNL018C	-2.18256	0.0281229
																																										YDR194W-A	-3.07197	0.0281363
																																										YFR032C	-2.16787	0.0292852
																																										YCR097W-A	-4.40618	0.0300932
																																										YER066W	-1.00399	0.0314709
																																										YOL166C	-4.50747	0.0334529
																																										YGR051C	-3.70799	0.0334529
																																										YAL064C-A	-3.00722	0.0335679
																																										YOL091W	-1.01166	0.0360061
																																										YLR329W	-1.20489	0.0417082
																																										YNL333W	-1.80609	0.0437256
																																										YNR071C	-1.33099	0.0460395
																																										YKL031W	-1.706	0.0473274
																																										YEL073C	-1.06685	0.0478311
																																										YHL022C	-1.09341	0.0481258
[truncated: 73 more columns]

## Sheet: Sheet4
bre1	lfcSE		bur2	lfcSE		bye1	lfcSE		cac1	lfcSE		cac2	lfcSE		cac3	lfcSE		cbc1	lfcSE		ccr4	lfcSE		cdc39	lfcSE		cdc73	lfcSE		chd1	lfcSE		ctr9	lfcSE		dhh1	lfcSE		dst1	lfcSE		eaf1	lfcSE		elf1	lfcSE		gcn5	lfcSE
BRE1	-3.03457	5.33313e-82	antiSMM1	-1.78532	4.27437e-11	antiARP7	-3.09474	3.1874e-14	FRE7	3.5333	7.67264e-88	FRE7	3.97226	4.29426e-122	PTR2	-2.05634	7.8358e-100	antiMEP3	4.03899	1.38891e-52	AGA1	3.39954	6.33287e-80	TSR2	1.6505	6.98906e-34	COS10	-3.658	1.64446e-41	GLN1	-1.77211	3.10655e-60	YLL053C_AQY2	4.17608	3.69615e-99	FIT2	2.89449	3.23319e-101	GLN1	-1.74655	1.33564e-19	PDR15_YDR406W-A	3.51156	7.60684e-125	ELF1	-4.52085	3.96703e-48	ARG1	2.59281
ARG1	2.19191	7.03768e-58	antiNNT1	-1.70135	4.27437e-11	RRP14	1.57559	5.52795e-14	PTR2	-1.97587	8.53645e-70	PTR2	-2.17337	2.06693e-85	THI7	2.12009	1.87236e-70	STO1	-2.68431	3.85043e-52	MFA1	3.49256	6.14214e-59	AGP1	-2.17721	1.84464e-31	CWP1	-3.88285	6.90634e-35	antiPPN1	2.44818	7.0401e-48	CTR9	-3.55191	8.77572e-93	FIT3	3.56244	1.2801e-70	antiSUN4	1.89882	1.32246e-15	HSP12	5.8404	1.62649e-113	MFA1	2.3086	4.41823e-30	antiYDR461C-A	-3.837
DIP5	-1.88877	8.48464e-54	antiTFP1	-1.71206	4.55537e-09	antiHSP150	1.83096	1.84478e-13	GLN1	-1.78998	3.03758e-69	GLN1	-1.94707	2.66837e-75	ADE17	-1.69189	1.48388e-60	ENO1	-2.02639	6.52311e-47	CCR4	-2.84144	9.9232e-55	FPR4	2.11823	3.63526e-31	YLL053C_AQY2	2.97754	1.09992e-33	antiRPS19A	2.52465	1.16101e-47	ARG1	3.51506	3.1308e-57	STE2	-2.49113	4.54692e-67	DST1	-2.12312	1.64651e-11	TDH1	2.91207	9.10466e-101	OPT2	-2.47278	6.32625e-25	PHO3	-2.65682
HPF1	2.43165	3.17068e-34	YCL058W-A	1.36765	7.44504e-09	antiAPC11	-1.45594	1.69538e-12	ENO1	-1.91586	6.18138e-56	ENO1	-1.98126	1.18133e-58	YOR152C	-1.88149	1.41108e-58	antiYMR124W	2.54628	2.39265e-35	FIG2	2.88423	1.33959e-49	SEN1	1.99062	4.90893e-26	ARG1	2.52974	3.63389e-27	antiSSH1	2.55665	1.4281e-37	CWP1	-4.29736	4.10339e-52	PDR15_YDR406W-A	3.2132	1.80387e-64	OPT2	-1.51505	9.33634e-11	antiMRP20	3.78368	7.7503e-86	ADE17	1.4457	1.55035e-24	antiTFB3	-3.8893
antiYDR461C-A	-1.52791	1.91247e-23	antiMBP1	-1.7668	3.83012e-08	antiAUR1	-2.05466	2.04622e-12	YOR152C	-2.10134	3.00006e-54	PDR5	-2.43565	8.68726e-52	GLN1	-1.54146	1.33575e-57	GLN1	-1.54186	1.01731e-34	PRM2	4.66949	8.13967e-41	PCA1	-6.0113	2.42477e-25	DDR48_YMR173W-A	1.8007	6.29917e-21	antiAIP1	2.53128	1.44534e-34	antiYDR461C-A	-2.24876	1.44556e-45	HSP26	3.61849	4.45501e-63	antiFLC1	-1.44572	1.49541e-07	RIM4	3.83013	2.64059e-80	antiYOL038C-A	-2.71856	9.94734e-24	antiYER139C	-2.71441
ECM13	2.36272	1.9171e-23	antiLSM8	-1.92743	1.15721e-07	antiYOR051C	-1.57036	4.13169e-12	PDR5	-2.33731	9.37706e-50	YOR152C	-2.08315	3.48562e-51	ENO1	-1.69453	6.21393e-49	antiDLT1	3.94092	1.42992e-31	antiRSA1	4.01918	4.30825e-35	LEU3	1.50437	5.0026e-25	HPF1	2.35096	1.45157e-20	antiRPS17A	2.71304	4.92838e-28	EXG1	-1.57497	1.68502e-34	AMS1	2.88933	2.22367e-54	BAT2	-1.19165	1.51687e-07	ENO1	1.88569	9.4323e-67	AQR1	1.35732	4.73414e-23	TIR3	3.63574
RIB5	1.30186	9.30802e-23	antiMIS1	-1.0519	2.44859e-07	CCW14	-1.15587	2.86607e-10	RSB1	-2.47357	3.06569e-44	RSB1	-2.78691	1.74889e-47	RSB1	-2.14847	4.52466e-47	YKL071W	2.80393	1.2461e-19	AFR1	2.20888	4.30825e-35	SEC39	1.65372	5.0026e-25	YNR062C	3.06409	1.11866e-18	YPR036W-A	-1.77511	2.8885e-27	antiFRE6	3.40687	3.13331e-33	HSP12	4.34709	1.30777e-53	AQR1	1.02384	4.97689e-07	YGP1	2.48348	5.41965e-66	MAE1	1.59319	1.63918e-20	antiYBR197C	-2.54144
BNA4	1.55197	5.77316e-22	antiMIG3	-1.44329	6.70371e-07	YOR152C	-1.00795	2.86607e-10	BNA1	2.15098	1.22662e-35	CAC2	-3.0668	4.84087e-42	BNA1	2.20258	4.58338e-46	OPT2	-2.40649	1.26694e-19	YHR177W	2.83283	8.88311e-31	VBA2	-6.70227	6.50849e-21	antiYDR461C-A	-1.42081	4.86386e-18	antiGAS3	2.42309	3.25473e-27	antiPTP3	2.69907	1.27378e-31	TDH1	3.32177	1.91096e-50	PDR5	-1.39085	4.97689e-07	DDR2	3.45521	1.21233e-65	antiARO2	-2.21547	1.83269e-20	antiRIF2	-2.39726
YNR064C	3.15571	1.23875e-21	BUR6	1.43126	9.31049e-07	antiOAR1	-1.46915	2.86607e-10	THI7	1.69341	1.12949e-34	THI7	1.87184	4.84087e-42	OPT2	-2.98116	7.42007e-46	ADE17	-1.21484	4.66076e-18	antiNOP15	-2.1957	2.37873e-30	RPN13	1.57509	1.06985e-20	IZH2	-1.61661	7.73154e-17	antiRSC2	2.68586	1.24366e-26	HTA1	-1.61285	1.42683e-31	antiAPC11	-4.05461	2.97995e-50	RSB1	-1.28077	4.97689e-07	antiGGA1	3.26253	1.71616e-65	antiYDR026C	-2.41996	4.52274e-17	antiSNL1	-2.33673
antiHXT3	1.89146	2.76044e-20	TPM1	1.36794	1.60897e-06	antiNSL1	-1.30479	1.59148e-08	AGP1	-1.71996	1.05473e-33	MEP3	-1.50574	3.42603e-38	AGP1	-1.85195	2.88534e-44	antiFLC1	-1.76632	6.03647e-18	KAR4	2.3154	5.20501e-29	RIF2	1.63635	1.06985e-20	WSC4	-2.57351	1.08045e-16	antiABP140	2.39582	3.80739e-26	antiPSF3	3.0705	3.40599e-31	VID24	2.29759	3.97174e-47	antiBPH1	1.28183	7.92662e-07	RSB1	2.5185	2.7136e-64	antiTFP1	-2.03521	8.65382e-14	OPT2	-4.08791
antiYGR110W	-1.89853	2.76044e-20	antiYOL038C-A	-2.34822	1.77894e-06	antiPRR2	-1.45745	1.59148e-08	YGR035C	-1.88562	2.7881e-33	antiSTE3	3.76941	2.21961e-36	MEP3	-1.27724	1.3425e-37	SPS4	-2.13078	2.3393e-17	BAR1	1.9564	1.33285e-27	SIR3	2.01224	1.1473e-20	YJL213W	-1.57637	5.18896e-16	YLR257W	-1.3823	2.9707e-25	antiRET2	3.13105	4.37667e-30	ENO1	2.08905	1.18688e-46	antiDYN1	1.26226	1.14134e-06	GRE2	2.48849	2.79601e-57	antiUTP20	-1.77969	4.58265e-13	ERG25	1.78212
antiTFA1	-1.97342	5.73643e-18	antiARL3	-1.99216	1.77894e-06	antiYDR049W	1.88715	7.71717e-08	OLE1	-1.25885	3.32855e-33	AGP1	-1.85876	3.83372e-35	ADE13	-1.14421	5.61537e-37	RGM1	2.36755	2.41482e-17	GSC2	2.17025	1.02022e-26	CRN1	1.68642	3.57451e-19	YTP1	2.36178	1.17728e-15	antiPSP2	2.75215	5.80554e-24	COS10	-2.53087	5.94619e-29	antiSNL1	-2.92844	9.31602e-46	antiHSP150	1.89137	1.89164e-06	FIT3	3.43852	1.15401e-48	antiMBP1	-1.77513	9.0368e-13	antiSPC24	-3.13441
COS10	-1.48986	8.13093e-18	OPT2	-1.55075	1.95115e-06	antiYLR099W-A	-1.79139	1.74694e-07	MEP3	-1.37226	6.81018e-33	YGR035C	-1.82825	1.36947e-30	YCK3	1.22035	3.51507e-27	RIM4	2.37505	5.13094e-17	AGA2	2.48282	6.07755e-24	YLR414C_YLR415C	1.6115	4.09984e-19	AIF1	-1.76627	1.42803e-15	antiJSN1	2.6405	2.76274e-23	SIT1	2.61698	1.21089e-28	PHM8	3.30879	2.21307e-45	antiYCR015C	1.60484	2.10695e-06	NCA3	2.42718	1.22334e-48	ENT4	1.03511	9.91479e-13	VID24	1.87371
antiECM13	2.34601	2.33081e-17	DEP1	1.43673	1.98697e-06	antiFMP16	-1.5161	2.97249e-07	antiSTE3	3.5163	7.61846e-29	YLR257W	-1.41715	6.09931e-30	OLE1	-1.05325	4.37875e-27	YLR257W	-1.33476	2.1179e-16	antiYER187W	3.60153	6.07755e-24	DRE2	1.51537	1.36363e-18	antiYGR110W	-2.12988	1.91206e-15	antiYNL176C	2.80365	2.76274e-23	YNR062C	3.46995	1.49796e-28	ACO1	1.99285	1.19957e-43	ADH5	-1.13149	2.25684e-06	YLR257W	-1.94997	2.35166e-48	antiRPL31A	-2.76671	1.31648e-12	antiMRS11	-2.19127
antiUTP20	-1.66355	3.4462e-17	antiLCD1	-1.1981	1.98697e-06	CGR1	1.61024	2.97249e-07	HTB2	-1.34285	1.26938e-27	antiCAC2	-4.61733	2.24475e-27	NOP13	1.26286	2.67207e-26	ESF1	1.29824	6.60736e-16	antiYHR177W	-2.28111	1.17947e-23	CMK2	1.9463	7.78441e-18	RGM1	1.52148	4.6295e-15	antiPAM1	1.75104	9.37129e-23	UBI4	1.95424	6.33964e-27	antiRIF2	-3.1277	3.79397e-42	antiSMC2	1.77941	2.8239e-06	YLR346C	4.0353	1.53119e-47	WHI5	1.21536	4.84735e-12	antiYNL035C	-2.25292
antiPSP2	2.58195	3.4462e-17	ECM16	1.02274	2.87925e-06	antiYJL144W	-1.3094	3.39243e-07	OPT2	-2.77851	6.6543e-27	OLE1	-1.23319	2.24475e-27	TPO2	1.52592	2.77976e-25	antiPIR3	2.92507	7.75641e-16	RSB1	-1.96329	2.61712e-23	YLR455W	1.26453	8.77823e-18	YLR419W	1.40665	4.6295e-15	antiRIM15	2.24814	1.42238e-22	HTA2	-1.40254	1.69598e-26	antiYDR461C-A	-2.58184	4.91607e-40	YIR018C-A	-1.10038	3.67484e-06	COS10	-3.3171	5.43159e-46	BUR6	1.22836	5.68911e-12	antiYLR063W	-2.20974
antiYLR063W	-1.44747	3.7723e-17	antiSTE6	-2.08131	2.87925e-06	EBP2	1.08354	3.84549e-07	CCW14	-1.27397	9.59972e-27	STE3	2.9964	2.85862e-27	CCW14	-1.14521	3.24039e-25	PLB1	1.47053	1.02293e-15	antiLAT1	-2.04328	2.93581e-23	CTP1	-6.82119	1.81382e-17	QDR1	-2.58362	3.02065e-14	AGP1	-1.41159	2.38019e-22	IZH2	-1.76528	2.43154e-26	SIT1	2.67953	3.87689e-39	COS10	-1.31955	4.41887e-06	antiERV2	2.25561	7.73079e-46	antiMFT1	-1.94114	9.9177e-12	HSP26	2.7163
YLR257W	-1.06613	1.78441e-16	antiYJR011C	-1.10655	4.0033e-06	antiSUB1	-1.35851	4.01151e-07	PMP3	-1.2703	1.21986e-26	BNA1	1.91645	1.00854e-26	PDR5	-1.66173	6.44541e-25	STE3	2.93304	7.78314e-15	antiYDR282C	4.01588	3.51417e-23	ARO10	3.53177	3.16188e-17	antiPTP3	2.13747	3.83641e-14	CHD1	-1.3715	1.18109e-21	antiMRS11	-2.05078	1.8282e-25	antiMRS11	-2.80588	6.29582e-39	HMS1	1.69545	6.18767e-06	GAC1	3.18937	5.18401e-44	TPM1	1.41401	1.32902e-11	PRY1	1.91636
YGL117W	1.60846	3.08001e-16	antiSLN1	-1.40172	4.23918e-06	antiYGR283C	-1.19767	4.01151e-07	YLR257W	-1.38129	1.32122e-25	CTR1	1.7057	2.96715e-26	YLR257W	-1.22092	1.85947e-24	antiGAD1	2.83281	4.28854e-14	antiMVD1	2.88274	8.90569e-22	TUS1	1.68101	4.17918e-16	antiGYP5	-1.57907	4.54211e-14	antiRPL37A	1.6363	3.04753e-20	antiPRP9	2.47832	1.88116e-25	YLR346C	2.92614	8.19174e-38	antiNNT1	-1.09726	1.05355e-05	ARN1	1.7593	8.7565e-44	antiARP7	-2.60666	3.53702e-11	antiPNC1	-1.79745
YLL053C_AQY2	1.72672	6.79067e-16	antiARP7	-2.28688	4.28633e-06	TPM1	1.04104	4.01151e-07	BGL2	-1.08542	3.13595e-25	BAT2	-1.42013	8.87207e-26	antiGIC1	1.95756	3.41395e-24	WSC4	-2.24896	2.59388e-12	ARG1	1.75547	9.26603e-22	DBP9	1.27809	5.06786e-16	antiSYF1	-1.5857	7.35371e-14	antiWHI3	2.30397	3.55079e-20	LEU1	-1.76171	3.86696e-25	SST2	-2.51216	8.19174e-38	PRY3	-1.14934	1.36786e-05	antiEPL1	-2.03606	1.11465e-43	antiSTE23	-2.07202	3.53702e-11	antiUPC2	-1.7544
antiMOT2	1.49063	1.2647e-15	antiSPT20	-1.7146	4.69252e-06	antiSWC5	-1.51772	4.01151e-07	BAT2	-1.29889	2.73058e-22	PMP3	-1.25147	1.97666e-25	antiSTE3	3.15174	3.41395e-24	RPL22B	-1.11335	2.67858e-12	antiPPT1	2.86337	1.4309e-21	antiCOS111	2.32426	5.06786e-16	YOL014W	-1.61754	1.23604e-13	antiESC1	1.69039	4.43237e-20	YJL133C-A	2.39705	3.94196e-25	antiPOC4	-2.39719	8.65915e-37	LAC1	-1.01458	1.63386e-05	AHP1	1.53414	1.11465e-43	PAC11	1.38647	5.90885e-11	SST2	-1.46785
antiARF2	-1.20547	4.74255e-15	antiMFT1	-1.78902	7.10463e-06	TVP15	-1.04414	5.40195e-07	STE3	2.8028	3.50369e-22	antiGIC1	2.10176	2.06199e-23	YGR035C	-1.37038	5.1013e-24	TDH2	-1.75565	3.23474e-12	YGL117W	1.88953	4.4134e-21	MAL31	-4.70683	8.14192e-16	antiFRE6	2.45893	2.02221e-13	antiHMO1	2.29339	7.94505e-20	RPS14B	-1.09687	4.52838e-25	HOR2	2.12285	9.58066e-37	YGP1	1.09724	1.73199e-05	YOL014W	-3.02643	2.39044e-42	UBI4	1.38948	1.29274e-10	RPS14B	-1.13775
ARG4	1.21901	6.70313e-15	antiSAP185	-1.69118	9.65552e-06	antiVMA13	-1.03804	5.89931e-07	PMP2	-1.25218	8.83284e-22	OPT2	-2.80818	3.33247e-23	STE3	2.64494	5.69172e-24	URA1	-1.16288	4.05916e-12	SED1	1.91048	3.28915e-20	YNL208W	1.35145	8.08008e-15	antiHTA1	-1.60452	2.27623e-13	antiSAG1	1.91691	7.94505e-20	antiYGR110W	-2.20253	8.05582e-25	RSB1	1.86687	2.81793e-35	YJL213W	-1.07609	3.67716e-05	SCS7	1.76648	9.93329e-42	CEM1	1.07943	1.43583e-10	YLR446W	-2.03732
GLN1	-1.19094	1.00795e-14	antiECM16	-1.42668	1.04113e-05	antiESF2	-1.14269	5.89931e-07	antiYOR051C	-1.86615	9.43912e-22	BGL2	-1.06371	4.48003e-23	antiUTP5	-1.63323	1.36943e-23	antiLAP4	1.60705	8.26154e-12	SST2	1.42294	1.6716e-19	antiARO10	-1.37829	1.19638e-14	antiECM32	-1.4652	2.27623e-13	BNA4	1.47041	9.55461e-20	GSC2	2.00623	8.55487e-25	UBI4	2.05002	3.05063e-35	antiEAF1	1.29683	0.000121134	antiIOC2	2.07293	8.00953e-41	ADE3	1.09405	3.44109e-10	AUS1	1.73465
antiVMA8	-1.47658	1.00795e-14	NOP2	1.01683	1.27684e-05	VMA9	-1.0219	6.69135e-07	RPP2A	-1.0071	1.42455e-20	FRE1	1.37941	3.07471e-22	BAT2	-1.22817	1.36943e-23	antiARP7	-2.63169	1.05375e-11	antiVIP1	-1.68526	2.09061e-19	DIA1	1.8689	1.37473e-14	antiYCR007C	-1.5437	2.84777e-13	antiIOC2	1.67259	1.13374e-19	YOL014W	-1.92983	2.3042e-24	PDR5	2.24666	6.35339e-35	antiSFL1	1.28875	0.000237407	HSP26	3.02351	1.39954e-39	SHM2	1.32913	4.12119e-10	antiYER156C	-1.97501
YOR338W	1.66507	1.82756e-14	antiYHR202W	-1.08431	1.28734e-05	antiRSM25	-1.32067	7.34779e-07	HHF2	-1.46642	2.18123e-20	antiYOR051C	-1.96431	1.32754e-21	MSI1	-1.4076	1.8384e-23	antiVMA9	1.16784	1.17885e-11	ECM13	2.01339	3.07678e-19	antiLAT1	-2.01356	1.54223e-14	AMS1	1.70221	3.76405e-13	antiYMR124W	1.85171	1.92685e-19	AMS1	2.15457	5.40803e-24	YOR338W	2.53749	2.9691e-34	DSE2	-1.08189	0.000263782	FRE5	3.14342	7.41633e-39	antiUFD2	-1.41929	4.12119e-10	LEU4	1.31006
ECM40	1.134	1.92826e-14	antiYDR026C	-1.51861	1.33176e-05	TAF7	1.13874	7.7791e-07	CTR1	1.46835	9.50898e-20	YHL012W	2.97368	1.79159e-21	TIP1	-1.3226	3.55359e-23	antiSLI1	2.0104	1.23077e-11	CPA2	1.62209	3.5437e-19	PGI1	1.0044	1.97121e-14	antiVPS33	-1.78626	4.75505e-13	antiNMD5	2.12954	6.72196e-19	GPD1	-1.82087	3.48461e-23	antiPRE1	-2.76439	4.95275e-34	RGM1	-1.04736	0.000352247	RNR2	1.99705	8.58028e-38	antiENP2	-2.5861	4.5401e-10	FBA1	1.43278
antiCOG1	1.57547	2.12909e-14	antiFMP24	-1.66901	1.33176e-05	antiTIF1	-1.38173	7.7791e-07	TPO1	-1.11121	1.0102e-18	CCW14	-1.23835	3.27531e-21	TPO1	-1.06816	1.09157e-22	SRL1_YOR248W	1.22531	1.40666e-11	ARO10	3.12615	4.3222e-18	OPT2	-2.32065	2.74536e-14	SIT1	2.0786	5.65103e-13	antiRPS29A	1.70737	1.74488e-18	YNL208W	1.77908	4.84058e-23	URA1	-1.61664	6.00059e-33	antiYLR152C	1.19515	0.000447181	GLN1	-1.4568	8.90448e-36	SPC25	1.339	6.10841e-10	antiSAM35	-2.28401
antiMRS11	-1.35144	3.24406e-14	SCM3	1.49248	1.33176e-05	antiMED11	-1.44351	8.2466e-07	TDH2	-1.19085	3.27416e-18	RPP2A	-1.00053	3.8697e-20	ADE5%2C7	-1.10743	2.08307e-22	ADE13	-1.0355	2.52694e-11	YOR052C	1.41862	6.26702e-18	GRS1_YBR121C-A	1.30917	2.7954e-14	YLR042C	-1.54871	5.65103e-13	antiRPL27B	1.65902	5.20838e-18	antiSYF1	-1.82872	1.35052e-22	antiSAM35	-3.67009	1.17795e-32	AAC3	-1.03386	0.000489415	antiGAL3	2.12368	6.03188e-35	ADE5%2C7	1.07948	6.29014e-10	antiAPE2	-1.86301
CPA2	1.03406	5.05014e-14	antiCOY1	-1.47811	1.43019e-05	antiUMP1	-1.30546	8.47431e-07	antiMAK3	-1.51716	8.07928e-18	GND1	-1.08003	5.80658e-20	antiHOR2	-1.7313	3.52616e-22	ADE1	-1.13928	4.6996e-11	antiPNS1	2.04391	7.5919e-18	PLB1	1.13236	2.86725e-14	FIT3	1.88558	6.3695e-13	antiPAH1	1.58327	1.51944e-17	YTP1	2.66272	1.35052e-22	PLB1	1.68302	9.10216e-32	antiPHO87	2.04534	0.000493346	YKL071W	3.14538	3.90611e-34	GCV3	1.18089	1.19107e-09	antiUMP1	-2.53056
antiAAT2	-1.37411	6.09539e-14	antiZEO1	-4.57425	1.6628e-05	BUR6	1.03799	1.09658e-06	FET3	-1.44554	1.14487e-17	antiMLF3	2.17304	1.14773e-19	PRY1	-1.37942	9.38071e-22	antiMEC3	-1.75735	7.21232e-11	antiBRL1	-1.87278	1.32594e-17	LSM3	1.61049	1.13193e-13	GPD1	-1.45159	1.16884e-12	antiRPL18A	2.59468	3.791e-17	TUB3	1.42793	2.11834e-22	AQR1	1.70192	9.30525e-31	YLR413W	-1.01505	0.000498498	HXT5	3.24883	7.61646e-34	GLC8	1.16256	1.20647e-09	ECM40	1.45121
antiYOL086W-A	-1.13124	6.09539e-14	antiMXR1	-1.51727	2.51621e-05	YLL014W	-1.14827	1.09658e-06	IPT1	-1.1935	1.19795e-17	antiYNL176C	2.69861	6.93195e-19	YLR243W	1.14645	5.16583e-21	AMS1	1.88413	1.59891e-10	PNS1	-2.11384	2.0481e-17	CDC73	1.41855	2.11052e-13	CDC73	-1.68917	1.32834e-12	antiYKL105C	1.59704	4.07221e-17	antiVPS33	-2.13963	4.05498e-22	FRE5	2.76964	9.30703e-31	MRH1	-1.02581	0.000512161	SIT1	2.6055	1.06696e-33	antiYNG1	-1.74629	1.56789e-09	antiVMA4	-2.38296
antiTCM62	1.2507	6.38257e-14	EBP2	1.24328	2.697e-05	antiWHI5	-1.3411	1.27758e-06	BNA4	1.41932	1.84125e-17	HTB2	-1.09417	1.90211e-18	antiYOR051C	-1.51638	4.93493e-20	URA4	-1.01328	2.68654e-10	CHS1	1.28383	4.81397e-17	RPL6B	2.15162	2.22736e-13	UBI4	1.59527	1.32954e-12	antiYKL171W	1.63618	6.51142e-17	MRH1	-1.14462	8.68784e-22	antiMRP20	2.38014	2.48775e-30	antiKRE11	1.12806	0.000603581	ARG3	2.64299	2.68039e-31	antiRPG1	-1.87778	2.15141e-09	antiCYT1	-2.61805
antiMSW1	-1.19921	6.75014e-14	antiNCE103	-1.65513	2.74222e-05	TRX2	-1.01691	1.50256e-06	YGL193C	-1.17247	1.85397e-17	antiVIP1	1.29882	6.21413e-18	antiSSO1	-1.70411	2.49966e-19	antiAPC11	-1.92052	2.75622e-10	ARG4	1.37922	1.47563e-16	YLR419W	1.68811	2.29634e-13	YOL159C-A	-1.93162	6.22676e-12	YLL053C_AQY2	1.76647	7.22253e-17	antiAPC11	-1.81411	2.87789e-21	ARN1	1.49666	3.25117e-30	SAM1	-1.06847	0.000738526	antiAPC11	-2.89093	4.35555e-31	antiRPS14A	-2.59708	2.61006e-09	antiLCB5	2.06567
antiTFP1	-1.40341	2.27028e-13	antiPSE1	-1.3339	2.9925e-05	antiPDX3	-1.10307	1.58541e-06	antiLYS20	-1.39221	6.0048e-17	PRY1	-1.33339	1.32528e-17	antiBIK1	-1.82812	7.47025e-19	antiPNC1	-1.25848	2.75622e-10	IME4	4.31818	1.69496e-16	YLR412W	1.09236	5.92944e-13	MNN1	-1.10845	6.22676e-12	antiSAN1	1.8184	9.6637e-17	PRB1	1.81555	4.03489e-21	YNL208W	1.79158	5.73117e-30	antiMOT2	-1.09218	0.000749196	HXT3	1.96284	8.41145e-31	antiSEC28	-2.34023	2.91148e-09	antiSUB1	-2.00844
antiERV2	-1.53606	4.94752e-13	YPR039W_TIP41	1.0194	3.53192e-05	antiYGL108C	-1.4235	1.79654e-06	TIP1	-1.19097	7.46428e-17	antiAXL1	1.79663	4.38458e-17	COS12	1.98207	7.91936e-19	antiFLO5	2.62965	3.66889e-10	antiJJJ1	-2.04651	5.90487e-16	MAG2	1.53672	7.37994e-13	antiMTO1	1.65325	7.10359e-12	antiRAP1	1.66039	1.09175e-16	TIR1	-2.51159	7.01585e-21	antiDHH1	3.80363	2.41485e-29	antiYDR387C	1.59837	0.000871839	IML2	1.40169	9.45113e-31	antiUBX3	-1.73304	4.98238e-09	GCN5	-2.06808
AGA1	-1.16622	8.52244e-13	YIR003W	1.03832	3.57059e-05	antiRNH203	-1.37581	1.92233e-06	VHR1	-1.07733	9.75873e-17	COS12	2.02834	9.29355e-17	antiTFA1	-1.64683	6.69386e-17	HTA1	-1.21976	4.35488e-10	antiYOR051C	-2.32984	5.3611e-15	IMD3	1.30579	9.7587e-13	ARR2	-2.7237	7.15749e-12	antiTUS1	1.91363	7.98796e-16	antiMSS11	3.63551	2.09302e-20	antiGLC3	-3.07617	1.02991e-28	DIC1	-1.16977	0.000878984	PDR5	2.03666	6.3364e-30	YBR016W	1.06495	7.42362e-09	SPS4	-2.37283
antiYMR210W	-1.41518	9.47189e-13	antiTSA2	-1.63237	4.3537e-05	antiNAT2	-1.06885	2.61411e-06	antiVIP1	1.22027	1.86474e-16	TIP1	-1.18858	9.66215e-17	antiMAK3	-1.33894	9.8943e-17	LAP3	1.00722	4.62233e-10	GLN1	-1.1789	1.17238e-14	CDC46	1.19605	2.93997e-12	YGL159W	-1.73949	1.32006e-11	antiPRP21	1.60368	1.26082e-15	MRS11	-1.3128	2.19948e-20	antiPNC1	-2.05902	5.79899e-28	HFM1	-1.44471	0.000878984	FET4	-1.8036	1.11956e-29	antiMAK3	-1.30262	7.42362e-09	antiAPC11	-2.25771
antiVMA4	-1.6072	2.10357e-12	PIB2	1.03822	5.79361e-05	antiYHL018W	-1.39061	3.49234e-06	COS12	1.99318	3.68582e-16	HXT3	-1.37275	1.09178e-16	antiGYP5	-1.26755	1.11075e-16	COS111	1.45756	5.74642e-10	antiARP7	-3.07212	1.90545e-14	antiHAA1	2.08673	5.57174e-12	YHB1	-1.85171	3.99524e-11	antiMAC1	1.55794	1.34947e-15	YNR064C	3.28334	2.39247e-20	antiYER156C	-2.40969	1.75731e-27	antiGLC3	-1.02888	0.000938999	HPF1	2.50129	7.19826e-29	antiCYB5	-2.18816	9.49211e-09	antiLSM12	-2.43358
RGM1	1.27632	2.48234e-12	antiYOR097C	-1.64271	6.3013e-05	antiUSA1	-1.02278	3.49234e-06	RPL4B	-1.44515	6.27776e-16	PMP2	-1.1237	1.12454e-16	RUD3	1.42865	1.58139e-16	PDC5	1.13357	1.31675e-09	antiMSL1	-2.18173	2.06698e-14	antiGIP2	-1.69109	5.85376e-12	antiMRS11	-1.53367	4.02937e-11	antiYMR086W	1.32886	1.44099e-15	THI7	1.97973	4.65675e-20	antiCOQ6	2.5628	9.48868e-27	HSP12	2.09008	0.00104011	GPH1_YPR160W-A	2.97457	9.85861e-29	antiPRE1	-1.0686	1.19243e-08	antiBUD20	-1.98807
antiYER156C	-1.30118	2.55948e-12	antiKRI1	-1.40806	8.82323e-05	antiYPL158C	-1.06718	4.18007e-06	YHL012W	2.70401	7.33015e-16	CRR1	1.7289	1.81042e-16	ERP4	1.00455	2.68877e-16	antiSPC97	-1.50484	1.6335e-09	PRM4	1.80933	3.22043e-14	MEP3	-1.06167	1.0162e-11	YCR007C	-1.66405	5.16994e-11	antiSEC18	2.08188	1.45654e-15	VID24	1.83041	2.24144e-19	YMR102C	1.53426	1.02189e-26	antiYDR461C-A	-1.052	0.00125105	VID24	2.39883	6.92109e-28	TDH1	1.20216	1.22799e-08	antiRPP1	-2.55978
RPI1	-1.12556	3.17675e-12	antiGLN1	-2.68587	0.000113115	antiCIN4	-1.2639	6.35072e-06	antiGIC1	1.82697	1.80923e-15	HHF2	-1.15496	3.18828e-16	HIS4	-1.00329	6.0765e-16	antiCOS111	1.49612	2.12316e-09	antiPGU1	1.50262	4.19809e-14	SGD1	1.28661	1.30331e-11	YEA4	-1.60405	7.00913e-11	antiYRR1	1.40545	2.6008e-15	HTB2	-1.29098	9.45847e-19	TMA10	3.69431	2.14504e-26	PTR2	-1.28739	0.00125526	YIL057C	1.72015	3.56844e-27	antiLCD1	-1.38328	1.42735e-08	antiPRE1	-2.09012
antiSHE9	-1.17566	4.34091e-12	antiYMR187C	-1.08002	0.00011884	antiSNU71	-1.12977	6.64864e-06	antiYNL176C	2.47337	6.24368e-15	CUS1	1.29774	3.22121e-16	ADE1	-1.09181	1.00769e-15	antiLAT1	-1.38524	2.98152e-09	antiYHR020W	2.46754	5.5476e-14	SPS4	-2.13133	1.69895e-11	TAZ1	-1.58024	1.39225e-10	antiTIM54	1.88164	2.68903e-15	antiBOP2	-1.78469	1.11413e-18	RNR2	1.75018	2.18947e-26	YOR152C	-1.10691	0.00126571	UBI4	1.77263	8.53771e-27	antiASI2	-1.23236	1.5234e-08	CDC19	1.37849
antiYPL216W	-1.15003	4.49609e-12	antiTVP15	-1.25586	0.000124025	antiNRG1	-1.17457	6.92169e-06	antiMRS11	-1.3645	6.24368e-15	antiLYS20	-1.37407	4.09258e-16	YIR042C	1.4966	1.00769e-15	GSC2	1.83494	5.18198e-09	antiAPC2	-1.80813	6.47112e-14	antiSNL1	-1.78424	2.2601e-11	antiAPE2	-1.43351	1.87541e-10	antiYGR237C	2.13657	7.29478e-15	YLR042C	-1.60035	1.52441e-18	YLR257W	-1.60443	9.83583e-26	antiPCA1	1.95071	0.00126571	YLR446W	-2.07461	9.19452e-27	antiNUP57	-1.88954	2.09643e-08	antiRSM25	-1.95639
antiIOC2	1.22101	5.27114e-12	VID24	1.36057	0.00013784	antiPOP3	-1.02479	7.25979e-06	antiASH1	-1.38937	6.40594e-15	antiMAK3	-1.42299	5.52998e-16	antiTPO2	-1.58883	1.00769e-15	antiIRC4	2.48188	6.91658e-09	SRY1	1.72675	6.50386e-14	ATG23	1.29074	4.33059e-11	PRB1	1.41469	2.20539e-10	antiGIC1	1.71103	8.61642e-15	OLE1	-1.43312	2.90727e-18	PRB1	1.86513	9.83583e-26	HOM2	-1.10487	0.00126571	antiZDS1	2.42315	2.48749e-26	ADE1	1.01593	2.1807e-08	antiKAR4	-2.16888
antiYSP1	1.25282	5.27114e-12	antiPEA2	-1.17219	0.00013784	NOP15	1.00285	7.42101e-06	APT2	-1.03841	8.87366e-15	antiSPS4	2.0773	1.43948e-15	antiJJJ1	-1.37962	1.59906e-15	antiECM32	-1.20911	7.05312e-09	antiPEP5	3.35148	9.35001e-14	CHS5	1.17612	4.38816e-11	antiERV1	-1.85851	2.54841e-10	antiLYP1	2.03234	9.86436e-15	TPI1	-1.00806	3.00497e-18	OAC1	-1.37684	2.63435e-25	antiTRX1	-1.0703	0.00142092	FET3	1.7662	3.70516e-26	antiARL3	-2.55421	3.22397e-08	FMP40	1.94292
antiPTC6	-1.27871	1.51677e-11	BCD1	1.04929	0.00013784	YML007C-A	-1.64462	1.11507e-05	antiYDR461C-A	-1.07596	9.65384e-15	TDH2	-1.04376	2.12999e-15	LIP2	1.21936	2.2118e-15	antiICY1	3.00008	1.15804e-08	antiCDC45	2.93474	9.95613e-14	YSA1	1.09515	4.6819e-11	antiYLR042C	-1.6051	2.56269e-10	antiPDR1	1.71067	1.96562e-14	antiECM32	-1.61962	3.75546e-18	PRY3	1.77888	4.98312e-25	antiYOR052C	-1.37099	0.00142834	antiHSF1	1.49892	3.80742e-26	antiRAD17	-1.56743	3.75264e-08	MET6	2.2812
antiLAT1	-1.35282	3.0663e-11	antiRPL40B	-1.18805	0.000138022	antiGIM5	-1.15983	1.18407e-05	antiTPO2	-1.88357	1.01529e-14	antiYMR124W	1.81091	3.43019e-15	CUS1	1.11907	2.25547e-15	PYC1	1.42678	1.56362e-08	antiARO10	-1.43439	1.24196e-13	antiARP7	-3.30934	5.46801e-11	antiGUT2	2.03554	2.69906e-10	antiYCG1	2.14509	2.25416e-14	PNS1	-1.50156	1.12198e-17	HXT5	2.90478	1.69046e-24	ADY2	2.19125	0.00143408	ADE13	-1.2757	4.27645e-26	antiCMP2	-1.65071	4.46551e-08	antiYDR051C	-2.85764
UGA3	1.01736	5.01498e-11	antiYPT32	-1.56107	0.000148978	antiLUC7	-1.17411	1.20895e-05	CUS1	1.22407	2.22706e-14	antiSSH1	1.91093	5.33827e-15	GAT1	-1.26249	7.88251e-15	NCA3	1.84736	2.42495e-08	PCL2	1.15069	2.33204e-13	ARO9	2.93066	7.55157e-11	antiBUD31	-1.70636	3.64299e-10	antiEDE1	1.28884	2.9395e-14	SPE3	-1.2678	2.24172e-17	GTO3	2.85573	2.57681e-23	HXT3	-1.41232	0.0014509	YMR102C	1.71183	1.12605e-25	antiRSA3	-2.52974	4.60987e-08	MNN1	-1.41937
PNS1	-1.08918	5.82079e-11	antiYPR145C-A	-1.82588	0.000155263	antiDYN2	-1.34524	1.32591e-05	VCX1	-1.09061	5.89725e-14	VCX1	-1.14188	6.08022e-15	antiYLR036C	1.71973	1.03715e-14	YOR338W	1.43853	3.69491e-08	COS111	1.57445	2.39658e-13	RRP14	1.22228	1.04441e-10	antiADY3	2.32268	3.65923e-10	antiDOA4	1.81386	3.13683e-14	antiADY3	2.68678	6.92434e-17	GLN1	-1.18881	4.2456e-23	antiARN1	1.17859	0.0014509	ACB1	-1.43658	2.0086e-25	antiSTE12	-2.17389	4.70334e-08	YLR149C	2.90358
antiYGL146C	-1.16919	9.73977e-11	YGR169C-A	1.36571	0.000163776	antiYNL247W	-1.13977	1.33573e-05	antiSPS4	2.04335	7.11926e-14	antiECM32	-1.20127	8.71772e-15	RRP14	1.08645	4.23717e-14	YBR116C_TKL2	2.02457	7.01619e-08	antiAFR1	-1.86111	4.23781e-13	HMG2	1.48255	1.17983e-10	GPI14	-1.211	4.47587e-10	antiYOR129C	2.23707	6.03788e-14	QDR1	-2.19184	1.07921e-16	antiYKR011C	-2.32799	7.25383e-22	SSP2	1.74745	0.00147215	antiCOQ6	2.24088	6.84557e-25	antiRPB2	-2.32646	5.51563e-08	YEA4	-2.19243
antiRIF2	-1.18798	1.03578e-10	PRB1	1.94485	0.0001881	antiCWC21	-1.69271	1.48732e-05	antiMLF3	1.90218	7.46854e-14	antiSEC6	1.7677	1.20149e-14	ICY1	-1.24271	4.57916e-14	GNP1	1.01755	8.75927e-08	GAL3	1.66381	4.48196e-13	YLR346C	2.2437	1.52083e-10	antiYLR287C	-1.53183	4.5972e-10	HPF1	1.70988	1.46756e-13	STE2	-1.17536	1.07921e-16	RGM1	1.74344	7.25383e-22	OLE1	-1.04929	0.00180397	antiPNC1	-1.91296	2.97791e-24	antiBRX1	-2.07091	5.61769e-08	antiPUT1	2.64356
antiTHI3	-1.18757	1.09653e-10	antiHED1	-1.75917	0.000200763	MUS81	1.16554	1.58089e-05	antiCTR1	-1.73674	1.15646e-13	SIP4	2.58576	1.57365e-14	antiLYS20	-1.12193	6.35711e-14	antiNPY1	-1.37335	8.77351e-08	YGR250C	1.60705	4.48196e-13	VPS68	1.01724	1.67558e-10	AGA2	-1.4925	5.84608e-10	antiVTC4	2.10481	1.98439e-13	MET6	-1.79978	1.13566e-16	YTP1	2.49869	8.59601e-22	antiFEN2	1.95093	0.00188081	AIF1	-2.12144	3.26666e-24	antiRPL16B	-2.15805	6.92595e-08	antiUBC13	-1.99963
antiIPP1	-1.19699	1.22764e-10	antiARO2	-1.70666	0.000200763	antiNUT2	-1.1488	1.58089e-05	antiYDL199C	2.1449	1.24317e-13	BNA4	1.313	2.17804e-14	antiVAC7	-1.46215	6.94096e-14	PRB1	1.14429	1.77846e-07	antiCCS1	-1.52807	6.81951e-13	YDR379C-A	2.05127	2.00683e-10	SMF1	-1.02067	6.06132e-10	antiSUB2	1.63409	3.31956e-13	antiYOL086W-A	-1.63019	1.13566e-16	antiCIK1	-2.01353	4.62916e-21	ELO1	-1.19565	0.00204461	TSL1	2.40709	6.48957e-24	antiSMM1	-1.65983	7.16458e-08	antiCIK1	-1.7151
antiSRB8	1.22791	1.44771e-10	antiYIL057C	-2.29584	0.000208682	antiHRD1	-1.18237	1.60616e-05	antiKAR4	-1.46401	2.02634e-13	antiMSS11	3.34793	4.13919e-14	antiECM32	-1.0789	1.02298e-13	JHD2	1.16785	1.77846e-07	antiNUP82	-2.11531	8.64924e-13	ECM7	1.17487	3.01726e-10	antiTFP1	-1.32403	6.30449e-10	antiSNF1	1.96077	3.42344e-13	antiHTA1	-1.80161	1.70753e-16	antiYGR110W	-2.54665	1.06069e-20	antiOCA2	-1.08339	0.00204866	IRC7	-1.91919	9.02034e-24	antiOSH2	-1.55102	7.2355e-08	antiAKL1	1.97516
antiBCY1	-1.37021	1.46839e-10	antiRPG1	-1.34841	0.000247297	antiDPB3	-1.08838	1.72441e-05	antiGYP5	-1.23028	3.23168e-13	RPL4B	-1.3687	4.61842e-14	antiRPL15B	-1.3709	1.10144e-13	IRC15	2.84126	2.19625e-07	antiMSR1	-1.88972	9.44996e-13	antiMKC7	-2.10993	4.25616e-10	antiAPC11	-1.24612	7.97196e-10	antiTAH11	1.6196	4.18106e-13	antiTCM62	1.80878	3.94585e-16	LEU1	-1.48677	1.86914e-20	BUR6	1.38892	0.00210802	PUT4	2.26675	9.63322e-24	antiRRP17	-1.79522	1.12991e-07	antiBUD7	-2.04901
DIC1	-1.26049	2.18796e-10	antiYNL155W	-1.46813	0.000257311	antiFAP7	-1.21653	1.77054e-05	antiAXL1	1.58943	3.8715e-13	YGL193C	-1.04964	7.21979e-14	YHL012W	2.35168	1.49753e-13	antiPXR1	-1.75361	2.27189e-07	antiYDR461C-A	1.23629	1.03161e-12	antiTFB3	-1.5979	7.40505e-10	antiMSS11	2.8071	1.32709e-09	antiRPL36A	1.14141	4.53908e-13	antiSOM1	3.331	5.35353e-16	antiOAR1	-1.77149	2.37504e-20	antiCIT2	1.53411	0.00227556	PGM2	2.30289	1.12785e-23	PHO4	1.05357	1.24155e-07	antiHAP5	-2.45005
antiAPC2	-1.11182	2.25064e-10	antiTOM7	-1.9823	0.000283281	antiDIG1	-1.25765	1.77054e-05	antiSSH1	1.82872	4.14109e-13	antiTFA1	-1.64454	2.7131e-13	antiICL1	-1.06643	3.31527e-13	SPO22	1.57248	2.52578e-07	antiPTK2	-1.75795	1.20875e-12	VMA6	1.59606	7.40505e-10	ECM12	-1.56155	1.33952e-09	antiSFL1	1.61372	7.71945e-13	antiRSC30	2.92675	5.53579e-16	antiLYS20	-1.75851	4.23641e-20	antiCCC1	2.22439	0.00265583	antiYKL071W	1.91431	1.55527e-23	MLC1	1.02599	1.24208e-07	antiYGR110W	-2.1211
antiMPE1	-1.04021	2.89859e-10	antiSRG1	-1.63334	0.000327583	antiSWM1	-1.08835	1.87334e-05	HXT3	-1.20912	4.32325e-13	antiTPO2	-1.7694	5.15407e-13	antiYCL058W-A	-1.17987	7.20675e-13	antiAPE2	-1.09911	3.62432e-07	antiYIL014C-A	3.30754	2.15992e-12	RPS19A	1.06163	7.40505e-10	antiGLC3	-1.38663	1.71566e-09	antiRAD26	2.04754	8.0283e-13	ALP1	1.87807	5.62352e-16	antiYMC2	2.26504	8.1315e-20	antiSKY1	1.47683	0.00285682	BRX1	-1.44675	1.83911e-23	antiMIG3	-1.47301	1.45534e-07	CAT8	2.283
antiAYR1	-1.24164	3.02382e-10	FIT3	2.42656	0.000335074	antiLSM12	-1.05728	1.96083e-05	antiECM32	-1.1342	4.35623e-13	antiGID7	1.69607	5.15407e-13	antiYMR124W	1.47343	8.83054e-13	antiSYF1	-1.06248	4.46949e-07	ELO1	-1.58219	1.61103e-11	antiYDR051C	-1.93853	7.93393e-10	antiTIM9	-1.89392	1.71566e-09	IRC7	-1.14717	9.67187e-13	ELO1	-1.14116	1.08851e-15	antiYOL097W-A	-1.41357	8.1315e-20	antiSCH9	1.43935	0.00285682	antiARF2	-1.61749	2.6154e-23	antiSLY1	-2.02915	1.49114e-07	BAR1	-1.98393
VID24	1.07518	3.77125e-10	SPO12	1.43474	0.000355388	antiLEO1	-1.1223	1.97038e-05	antiGID7	1.65238	4.69127e-13	IPT1	-1.03226	8.32766e-13	antiMSA2	1.39245	8.83054e-13	GPH1_YPR160W-A	1.57067	4.49537e-07	PRM5	1.95867	1.81712e-11	UBC4	1.30735	2.63818e-09	SWF1	-1.41165	1.71595e-09	antiGCN4	2.314	1.05553e-12	antiGYP5	-1.85502	1.11286e-15	antiTFB3	-2.27218	3.1366e-19	FRE5	1.19398	0.0030394	antiGAC1	-1.46701	2.68837e-23	antiIDI1	-2.65895	1.85281e-07	TSL1	2.11766
CWP1	-1.29894	4.83785e-10	SYF2	1.64179	0.000410562	YAL037W	1.17292	1.98424e-05	TPO2	1.29239	4.93792e-13	CCW12	-1.04261	8.32766e-13	antiYKL215C	1.5007	1.19987e-12	PDH1	2.22934	6.30387e-07	antiRAP1	1.63032	2.03164e-11	ENB1	1.48851	2.75741e-09	OST4	-1.08553	1.83711e-09	antiMIR1	2.13492	2.06763e-12	YLR413W	-1.14452	1.11809e-15	IRC15	2.67201	3.16351e-19	SHM2	-1.0624	0.0030394	CCC2	1.59875	3.07862e-23	HEM4	-1.6462	3.26897e-07	ARG5%2C6	1.65458
antiMDV1	1.4606	5.39746e-10	antiFYV6	-1.90034	0.000423657	SYF2	1.09242	2.46455e-05	antiDYN2	-1.70227	5.79956e-13	NOP13	1.00223	9.51004e-13	antiGTB1	-1.04354	1.37356e-12	antiSUN4	1.80031	6.43538e-07	antiDPB3	-1.88354	2.11123e-11	antiUGA2	-1.60524	3.34902e-09	GSC2	1.21396	2.14077e-09	antiCYK3	1.70286	2.38893e-12	ECM12	-1.8681	1.33572e-15	antiSNU71	-2.12588	3.77941e-19	IMG2	1.01396	0.00313276	antiFLC1	-2.08422	8.42906e-23	antiMXR1	-1.52176	3.39919e-07	PGM2	2.16338
antiKAR4	-1.25419	5.8034e-10	antiYEL025C	-1.10328	0.000503418	antiHNT2	-1.01981	2.63337e-05	antiOAR1	-1.22771	9.86382e-13	TVP15	-1.24645	9.70028e-13	antiRNH203	-1.65042	1.41682e-12	AAC3	1.16864	6.98422e-07	YFL052W	1.97457	2.20884e-11	RPS1A	2.01152	4.56254e-09	antiYET1	-2.16429	2.74347e-09	TIR1	1.18234	3.51366e-12	antiMDV1	1.9274	1.80231e-15	antiAPE2	-1.8095	3.9166e-19	antiCDC39	1.61758	0.00340789	ADE12	-1.02181	8.54309e-23	YOR032W-A	-1.03869	4.28022e-07	YPR036W-A	1.2754
CIT2	-1.03525	5.97068e-10	antiNUP57	-1.23745	0.00055193	antiYNR018W	-1.18415	2.77095e-05	antiBIK1	-1.49146	1.23467e-12	antiSLI1	2.0525	1.04193e-12	antiELA1	-1.05009	1.75726e-12	antiCCS1	1.09068	7.40843e-07	antiMFT1	-1.71868	2.41319e-11	YLR426W	1.18942	4.56254e-09	VID24	1.20378	2.86767e-09	antiRRP45	2.0484	6.01406e-12	antiKAR4	-1.85036	1.87906e-15	antiNDT80	-1.98309	4.77926e-19	antiCEM1	1.32092	0.00349744	SCW4	1.2958	1.95745e-22	antiRPP0	-3.17811	4.67322e-07	ARG3	2.26556
antiTFB3	-1.25196	6.6748e-10	ESF2	1.12837	0.000607481	antiYNL217W	-1.23097	3.01527e-05	antiGUT1	1.71555	1.56355e-12	antiGYP5	-1.19133	1.85274e-12	antiMLF3	1.65495	2.02551e-12	antiYNR073C	2.24699	8.2061e-07	antiDTD1	-1.70119	2.41319e-11	YHC1	1.15358	4.87756e-09	antiPRR2	-1.4255	2.91065e-09	antiLST4	2.09117	6.72329e-12	antiYHR202W	-1.23279	2.32813e-15	TIR1	1.75032	5.34286e-19	antiARP7	-1.76816	0.0036229	antiGLC3	-2.14582	2.15268e-22	antiARX1	-1.72618	6.23473e-07	FUR1	-1.20912
antiTSC10	-1.40389	7.15973e-10	NOP15	1.12596	0.000609643	antiYHR087W	-1.03465	3.4366e-05	antiSEC6	1.7117	1.75447e-12	TPO2	1.26815	2.30973e-12	antiYGL185C	-1.10991	3.59299e-12	SPI1	1.44965	8.84062e-07	HYM1	1.05497	2.45698e-11	MAK5	1.28883	5.19707e-09	CYB5	-1.2303	3.26338e-09	antiSGT1	1.69	7.30783e-12	TYE7	-1.35091	2.41265e-15	YAT1	2.29009	8.48778e-19	antiYCR099C	2.53455	0.00398349	AMS1	1.99457	2.2305e-22	antiTVP15	-1.58924	6.23473e-07	SUT2	-1.68416
antiASE1	1.92089	8.04702e-10	antiSTE23	-1.37909	0.000674094	SPO23	-1.00606	3.46351e-05	ADH2	1.68171	1.78785e-12	antiKAR4	-1.38209	3.41772e-12	antiVPS33	-1.25028	6.2293e-12	UBI4	1.21102	1.54934e-06	YDR379C-A	2.06316	3.24885e-11	NMA1	1.08181	6.51124e-09	ARR3	-2.24701	4.29679e-09	YGR035C	-1.23044	7.73913e-12	DDR48_YMR173W-A	1.35299	5.82253e-15	GSC2	1.47207	1.47713e-18	antiLSC2	-1.0414	0.00411669	SER2	-1.4338	4.47729e-22	antiRPL13B	-2.89834	6.23473e-07	antiSPC97	-1.73605
SPG5	1.15003	8.22192e-10	VPS51	1.29106	0.000708428	NSE4	1.00364	4.49279e-05	antiTFA1	-1.55772	1.80657e-12	YIR042C	1.4856	4.16044e-12	antiGAL3	-1.20294	7.30066e-12	RPI1	-1.58022	1.9252e-06	YGR146C	1.13491	3.40883e-11	antiRFC3	-1.53529	6.70058e-09	antiRIF2	-1.20477	4.7553e-09	antiYNL181W	1.66199	7.79413e-12	RPS28B	-1.03382	6.35725e-15	antiYNL035C	-1.87269	2.13623e-18	antiDAK1	1.18726	0.00411669	URA1	-1.26975	8.14119e-22	antiMOT3	-1.62062	7.23933e-07	HUL4	1.73367
antiSUN4	1.41103	8.95332e-10	antiSCP1	-1.21966	0.000708428	PEX14	1.00699	4.62692e-05	FRE1	1.04917	1.80657e-12	antiASH1	-1.27574	4.72113e-12	antiYOR238W	-1.4611	9.61704e-12	antiALG14	-1.20001	1.93358e-06	YGP1	-1.44917	5.30865e-11	SPP382	1.30583	6.73936e-09	PET100	-1.36473	4.87127e-09	antiGID7	1.54137	9.70852e-12	YDR222W	-1.6019	7.37735e-15	HPF1	3.656	6.57873e-18	antiMDM30	1.23329	0.00411669	IRC15	2.77288	2.23299e-21	antiBUD27	-1.05798	8.47311e-07	SFK1	-1.53806
YLR446W	-1.01252	9.63344e-10	antiCSN9	-1.29151	0.000708428	antiTAF10	-1.14285	4.67399e-05	YSW1	2.67793	2.62103e-12	antiHSF1	-1.21256	6.22973e-12	antiASH1	-1.06334	1.0955e-11	ECM4	1.3906	2.39137e-06	antiSIP3	-1.79305	5.30865e-11	COS111	1.63562	7.86912e-09	YDR541C	-1.50884	5.04198e-09	antiYPL141C	1.54453	9.70852e-12	antiYBR224W	2.24957	1.71568e-14	antiWRS1	-1.89266	6.61024e-18	HTA1	-1.12967	0.00470032	RNR4	1.40819	2.85162e-21	YOR338W	1.13183	8.92728e-07	SPT8	1.22133
antiLSM12	-1.21258	1.18432e-09	antiBRX1	-1.47816	0.000733841	antiHAP3	-1.44722	5.24353e-05	antiARO10	-1.04658	3.2911e-12	antiUTP5	-1.28656	6.56427e-12	antiBUR6	-1.5689	4.40682e-11	PDR11	-1.06963	3.30416e-06	ARO9	2.58055	5.31385e-11	YLR422W	1.13018	7.86912e-09	MRS11	-1.02493	5.81965e-09	antiYER163C	-1.74947	9.70852e-12	antiFLO8	2.4695	1.93374e-14	antiSUN4	1.97603	7.4486e-18	antiMMP1	2.21645	0.00485739	FIT2	1.60389	3.07389e-21	antiATP4	-2.28852	1.06453e-06	antiARF2	-1.35464
antiSPC24	-1.13114	1.41677e-09	antiMOT3	-1.05189	0.000741372	antiVPS60	-1.06421	5.34624e-05	antiVMA8	-1.37011	7.69165e-12	antiMRS11	-1.20294	9.75965e-12	antiPRR2	-1.16846	4.40682e-11	antiSPI1	2.64329	3.3494e-06	HSP26	2.90939	7.1975e-11	SPT7	1.21245	7.86912e-09	antiGIP2	-1.37943	7.14835e-09	antiPET112	1.39918	1.06816e-11	antiBCK1	1.87905	2.04048e-14	antiYER139C	-1.75369	1.19479e-17	YPT53	2.04196	0.00511578	NIP7	-1.38834	3.66494e-21	antiSUB2	-1.59936	1.18208e-06	antiPDX3	-1.58079
antiYNL035C	-1.09571	1.48655e-09	antiAVO1	-1.0581	0.000741372	antiYPL113C	-1.04273	5.7279e-05	antiYDR131C	1.95976	8.79551e-12	ADH2	1.60459	1.14787e-11	SLC1	-1.11428	4.41907e-11	VID24	1.59173	3.74402e-06	antiPEX14	-1.96032	7.36872e-11	RPL25	1.06743	8.57271e-09	antiTCM62	1.13709	8.66026e-09	antiHSP150	1.49927	1.1446e-11	YGL159W	-1.61299	5.40553e-14	MCH5	1.68683	1.38114e-17	antiMUS81	1.14027	0.00524866	YJL133C-A	2.01863	4.02648e-21	antiENT5	-3.57228	1.20157e-06	antiBUB3	-1.78827
antiMAK3	-1.08317	2.21667e-09	LGE1	1.10116	0.000746849	antiSGT2	-1.25468	5.87864e-05	SIP4	2.39748	1.04821e-11	antiRPL40B	-1.49581	1.25348e-11	antiKAR4	-1.27764	4.97335e-11	FUR4	1.10847	3.86143e-06	antiPLB2	2.70743	7.36872e-11	ECM30	1.20645	8.76099e-09	antiYDR185C	-1.47912	8.66026e-09	antiASE1	2.10168	1.14802e-11	antiASI2	-1.68678	6.06909e-14	PYK2	1.80713	4.9551e-17	antiFRE6	1.30679	0.00553846	PLB1	1.1595	1.45962e-20	GCV2	1.16167	1.21878e-06	SET4	2.40098
COS12	1.55511	3.03884e-09	antiARX1	-1.28272	0.000749165	antiRRM3	-1.0859	6.03464e-05	antiHSF1	-1.24488	1.13814e-11	antiSNL1	-1.18104	1.26295e-11	antiTMA17	-1.77482	6.98044e-11	antiMUC1	2.17597	3.86143e-06	YFL054C	1.26222	8.96734e-11	RIF1	1.06801	8.78399e-09	CLB1	-1.07819	9.74182e-09	antiCLG1	2.65831	1.17365e-11	antiTRX1	-2.5419	6.37406e-14	MAE1	1.32484	6.10002e-17	RPL1A	-1.13576	0.00553846	PHM8	2.55281	3.5176e-20	antiCYC8	-1.91635	1.28276e-06	GLC3	2.05183
antiEAF1	1.63984	4.01322e-09	RIM8	1.20108	0.000754076	antiSNL1	-1.05295	6.17232e-05	antiYOR238W	-1.55363	1.33489e-11	antiYLR036C	1.67654	1.75712e-11	YSW1	2.44651	1.1221e-10	antiIRC18	3.22923	5.30403e-06	antiTPO1	2.20077	1.241e-10	antiSMF2	-1.71451	9.52349e-09	antiMDV1	1.52207	1.10566e-08	antiPSD2	1.27928	1.27796e-11	antiYLR287C	-1.66241	8.21136e-14	antiYPL077C	-2.28655	1.0832e-16	antiARE1	1.24188	0.00553846	UTP9	-1.10649	4.8279e-20	antiUTP14	-2.02706	1.28276e-06	antiSAE2	-2.24674
antiASI2	-1.22674	4.23344e-09	antiCSH1	-1.37498	0.000826545	antiBUD20	-1.10435	6.59035e-05	YHR177W	2.07845	1.64599e-11	antiVAC7	-1.45434	1.7693e-11	antiPTR3	1.34866	1.12245e-10	CWP1	-1.77592	5.8099e-06	antiSUN4	1.48466	2.37169e-10	VIP1	1.50317	1.80892e-08	GDH3	-1.21355	1.1343e-08	antiDNF1	2.0803	1.39745e-11	antiYDR185C	-1.84371	8.24265e-14	antiALG13	-1.95026	1.15893e-16	SPO1	-1.14144	0.00589124	SED1	1.50939	1.0338e-19	antiSSO1	-1.18291	1.28276e-06	antiDUR1%2C2	1.5182
antiNUP57	-1.4546	5.22213e-09	RRP15	1.48896	0.000869214	antiJLP2	-1.12904	7.7644e-05	PRY1	-1.03812	1.65723e-11	antiYCL058W-A	-1.33034	2.31826e-11	antiDYN2	-1.40616	1.18518e-10	antiYLR108C	2.63807	5.81678e-06	antiTMN2	2.21543	4.77273e-10	antiPRR2	-1.57039	2.07345e-08	antiTAF2	-1.06493	1.13749e-08	antiDHH1	2.7	1.39745e-11	RIF2	-1.53419	9.80426e-14	OLE1	-1.04344	1.15893e-16	antiYMD8	1.62687	0.00622454	antiCAX4	2.188	1.55808e-19	antiRPS19A	-1.45404	1.36314e-06	SED1	1.40024
antiESC1	1.17669	5.33766e-09	PEX14	1.08631	0.000931438	antiGPG1	-1.13313	8.22009e-05	YIR042C	1.44484	1.74826e-11	antiDAM1	1.50503	2.44492e-11	antiRPL40B	-1.25886	1.3714e-10	antiKAR4	-1.33251	5.90407e-06	antiHED1	-1.83402	5.2939e-10	GPX2	1.15202	2.07345e-08	YHL042W	-1.48141	1.13749e-08	antiESBP6	2.62603	1.49696e-11	antiVAM6	2.07972	1.3339e-13	YPR036W-A	1.25277	1.24793e-16	antiRPS16B	1.22079	0.00622454	antiYMC2	2.16413	1.94366e-19	antiSRG1	-2.06135	1.38189e-06	antiCPS1	-1.85614
antiSYF1	-1.0479	7.01697e-09	antiYKL023W	-1.13499	0.000931438	antiSNF6	-1.08903	8.62209e-05	antiFAP7	-1.45004	1.87019e-11	antiHNM1	1.21837	2.87567e-11	antiCTI6	-1.1636	1.40395e-10	antiHOR2	-1.14388	8.51837e-06	antiMRP13	-1.70762	6.02739e-10	VPS36	1.13338	2.07345e-08	CHA1	-1.26907	1.36071e-08	antiHOG1	1.45059	1.82341e-11	antiSNL1	-1.41609	1.35591e-13	IDH2	1.28602	1.53612e-16	antiMRPL36	-1.1196	0.00644719	CPA2	1.19342	3.10681e-19	antiRPL42B	-2.38343	1.38189e-06	antiYCR007C	-1.5244
antiRSM25	-1.2106	7.40245e-09	antiECM19	-1.12095	0.000937695	antiPEX14	-1.01747	9.29068e-05	antiVAC7	-1.45135	2.09102e-11	antiGUT1	1.67062	3.39855e-11	antiFAP7	-1.29592	1.55625e-10	PUT1	1.05435	9.70057e-06	YJL213W	-1.21213	6.29365e-10	FMP27	2.29261	2.07345e-08	YPR036W-A	-1.08103	1.69573e-08	antiTCB3	1.59144	2.49426e-11	antiARF2	-1.21562	1.39059e-13	antiUPC2	-1.35314	1.5917e-16	antiVPS9	1.87204	0.00682729	antiTHI3	-1.81889	6.42732e-19	antiPAN1	-2.05427	1.45332e-06	YJR146W_HMS2	-1.21894
YTP1	1.68867	8.10905e-09	AQR1	1.00785	0.00104121	antiRPL13A	1.73613	9.44129e-05	CIS3	-1.01182	2.62445e-11	antiBIK1	-1.42716	3.39855e-11	BNA4	1.02169	1.60014e-10	OSW2	2.40136	1.30159e-05	TMA10	3.53892	1.00518e-09	antiLSM12	-1.34354	2.66486e-08	antiSNL1	-1.22367	2.13725e-08	antiAXL1	1.66078	2.49426e-11	VHR1	-1.007	1.53985e-13	antiFIT3	4.00306	1.68052e-16	SNO1	1.51794	0.00682729	ADE1	-1.86661	1.34745e-18	CDC26	1.11467	1.51799e-06	MAE1	1.12557
antiLSM1	-1.28227	9.01716e-09	SPN1	1.37717	0.00106875	antiMLF3	1.22483	0.000111408	ATP18	-1.13035	2.74105e-11	FET3	-1.13309	3.54819e-11	antiYNL134C	-1.26219	1.61599e-10	IRC18	2.5537	1.45186e-05	antiGTB1	-1.27513	1.02462e-09	ATG17	1.29889	2.94074e-08	YGL157W	-1.12255	2.16312e-08	antiYPR115W	1.54187	3.08971e-11	antiYCR007C	-1.40614	1.54075e-13	MDH2	-1.57515	1.69119e-16	BAG7	1.54985	0.00682729	PEP4	1.44487	1.71811e-18	antiMRS11	-1.18316	1.59492e-06	antiACS1	1.72995
antiYNL217W	-1.33615	9.29346e-09	antiPTI1	-1.01569	0.00117431	antiJJJ1	-1.03372	0.00011165	antiPSP2	2.23594	2.81695e-11	antiYDR131C	1.9346	4.1536e-11	MIP6	1.80563	1.61599e-10	REC8	2.38786	1.51209e-05	STI1	1.13376	1.10318e-09	FLR1	-1.03038	2.97651e-08	antiRTN2	1.81554	2.17178e-08	antiLHS1	1.51551	4.11404e-11	MNN1	-1.15272	1.54075e-13	ESC1	1.25964	2.85172e-16	antiRPA14	-1.03084	0.00703932	PRY1	1.35563	1.75457e-18	RCN1	-1.19717	1.59492e-06	AQR1	1.11722
antiSER2	-1.22025	9.68991e-09	antiYJL150W	-2.13823	0.00117431	YRB2	1.07262	0.000113552	antiAVT3	2.0172	2.90978e-11	antiRAD6	1.96094	4.29458e-11	YER128W	1.24381	2.82164e-10	YGP1	1.44961	1.57967e-05	antiPLP1	-1.94276	1.10318e-09	DBP3	1.02084	2.99593e-08	antiPRP9	1.60444	2.21458e-08	antiERG11	2.06942	4.11404e-11	antiSRB8	1.46272	1.90294e-13	FMP12	1.56737	3.37056e-16	antiCAN1	1.6009	0.00724726	MIG2	1.67008	1.99585e-18	antiRPL13A	-2.52839	1.59492e-06	antiPHO5	-1.67678
antiGVP36	-1.63126	1.01645e-08	antiSHE1	-1.02123	0.00118273	YJL062W-A	-1.04853	0.000119204	VMA9	-1.02866	3.86372e-11	antiKAP122	2.27714	5.08293e-11	antiYNL247W	-1.28436	2.8253e-10	YDL241W	1.14343	1.58898e-05	HAP4	1.82111	1.42174e-09	antiYPL158C	-1.34398	3.18739e-08	antiMEI4	-1.42552	2.52146e-08	antiSEC16	1.2896	5.46683e-11	antiYSP1	1.51659	1.96787e-13	HSP104	1.53837	6.4242e-16	antiMDN1	1.56005	0.00871011	antiHSP150	1.76376	2.1739e-18	NOP6	1.0064	1.62879e-06	CWP1	-2.12647
antiRAD17	-1.28019	1.18169e-08	RRP14	1.49981	0.00121615	antiGLN1	-2.12786	0.000119642	antiIDP2	-1.41503	3.87766e-11	antiYDL199C	1.97684	7.12219e-11	antiOAR1	-1.04203	2.90064e-10	antiOMS1	4.46287	1.8957e-05	antiPRP21	-1.6828	1.57158e-09	LEU1	1.60218	3.72526e-08	AQY1	1.91339	2.5351e-08	antiYCK2	1.3074	5.63055e-11	YGL157W	-1.32568	2.41512e-13	antiFAP7	-1.97506	6.46455e-16	antiYPR153W	1.09984	0.00876906	antiRIM4	-1.69744	2.20106e-18	antiRRP12	-2.31474	1.62879e-06	antiERV2	1.48415
antiUAF30	-1.17084	1.69654e-08	antiYHP1	-1.08838	0.0012639	RPL4B	-1.13413	0.000125417	antiPTR3	1.46328	4.43414e-11	MIR1	-1.16033	7.25822e-11	antiRSM25	-1.2033	4.15003e-10	antiYER187W	2.1588	2.12788e-05	NRG2	1.53902	2.01692e-09	antiYNL217W	-1.69417	4.12109e-08	antiTPK1	-1.05601	2.69946e-08	antiAVT3	1.90218	6.44009e-11	SNO1	3.104	3.93758e-13	YOL014W	-1.51414	1.03085e-15	antiSED4	1.48975	0.0094454	antiTRM2	2.83459	4.08411e-18	antiMYO2	-1.09397	1.78172e-06	YLR064W	-1.75749
antiVPS33	-1.1232	1.80904e-08	FRE5	2.16198	0.00132933	antiPUS9	-1.00821	0.000125417	HHF1	-1.16094	5.75663e-11	antiPSP2	2.16178	8.67497e-11	PRM2	2.53761	4.25784e-10	UGA4	1.35736	2.46572e-05	BNA1	1.38205	2.20652e-09	antiMRS11	-1.35596	4.14427e-08	YCR090C	-1.27357	2.89902e-08	antiEXO1	1.46088	7.02695e-11	ARN1	1.27444	5.14157e-13	OPT2	-2.11688	1.10331e-15	antiYHL044W	2.16085	0.0107097	antiTUB3	2.47981	5.75564e-18	antiRPN2	-2.20759	1.93124e-06	YOL014W	-1.58321
antiYLF2	-1.33979	1.91242e-08	antiHHT1	-1.17317	0.00154146	antiBUD31	-1.34651	0.000132027	antiFMP16	-1.59507	5.75663e-11	antiMKK1	2.76773	9.07163e-11	antiFMP16	-1.38109	4.68673e-10	antiCAK1	1.77936	2.52422e-05	antiSMM1	-1.40683	2.45701e-09	SUS1	1.30058	4.14427e-08	PHO80	-1.03953	3.28442e-08	antiXRS2	1.49684	8.14962e-11	antiTIM9	-2.07654	5.14183e-13	TSL1	1.77466	1.8598e-15	antiTOF1	1.09662	0.0107153	antiTIF1	-2.36253	6.09937e-18	antiMRPL9	-2.39783	2.062e-06	YFR017C	2.41713
CDA1	2.59119	2.03624e-08	antiSUN4	1.38846	0.00163871	antiVAC7	-1.05114	0.000132408	CRR1	1.43207	1.14715e-10	GAT1	-1.17979	1.02049e-10	antiGID7	1.32972	6.67849e-10	CAT2	1.27916	2.52422e-05	antiBCP1	-1.25665	2.49604e-09	MIS1	1.07758	4.19761e-08	HHF2	-1.18384	4.18746e-08	antiYDR186C	1.6789	1.10093e-10	antiMTO1	1.75912	5.49087e-13	antiFMP12	-2.89004	2.06054e-15	antiALR1	1.22014	0.0109112	HOR7	1.06119	6.09937e-18	FMP46	1.12933	2.20956e-06	YLL058W	1.55227
PRM4	-1.28965	2.40399e-08	antiYNL035C	-1.15847	0.00165522	ERI1	-1.23399	0.000150004	antiSSO1	-1.44312	1.21082e-10	antiJJJ1	-1.32369	1.13119e-10	RPL4B	-1.0972	9.05201e-10	antiSAN1	1.38866	2.8367e-05	antiMSC2	-1.55266	2.60046e-09	antiJJJ1	-1.33541	6.52549e-08	YPR071W	-1.26735	5.70218e-08	antiMDL1	2.11589	1.28025e-10	antiKRE11	1.89416	6.16138e-13	antiPTI1	-1.60927	2.59079e-15	antiPFK27	1.36606	0.0114859	antiIXR1	1.75848	6.56338e-18	antiARF1	-2.0442	2.20956e-06	PGK1	1.00481
antiSEC72	-1.52042	2.42933e-08	GLC8	1.54838	0.00171441	antiYAL046C	-1.31158	0.000150335	RPL1B	-1.01664	1.30528e-10	antiSSO1	-1.49995	1.18955e-10	antiARA2	1.39285	1.33501e-09	YFL054C	1.08496	3.3342e-05	antiCGR1	-1.74014	2.60046e-09	antiYOR186W	-1.30044	6.62243e-08	antiBOP2	-1.30658	5.77224e-08	antiLEO1	1.27957	1.42231e-10	YEA4	-1.47522	6.30668e-13	FMP40	1.84716	2.79163e-15	antiSWI3	1.24736	0.0116048	GSC2	1.46404	9.30762e-18	antiSRP54	-2.19285	2.38109e-06	YOR152C	-1.53951
antiLSC1	-1.69346	2.52699e-08	antiYJR124C	-1.16201	0.00171809	antiYMR244C-A	-1.2913	0.000159412	antiATG22	2.24219	1.42894e-10	antiATG2	1.98466	1.23712e-10	antiYNL217W	-1.25205	1.8646e-09	antiGAL1	1.21206	3.61905e-05	antiYNL134C	-1.38442	2.60046e-09	antiAPC11	-1.12882	7.10891e-08	TIR1	-1.43438	6.23422e-08	antiCAD1	1.3528	1.73666e-10	MMF1	-1.08224	6.75086e-13	YLR446W	-1.5586	2.97313e-15	SFC1	1.94181	0.0116048	antiMEP3	1.94397	1.04991e-17	antiNOP2	-2.1818	2.4065e-06	antiYAT2	-1.45755
antiLTE1	1.64331	2.52699e-08	antiPSF3	-1.33869	0.00171809	YIL161W	1.03196	0.000166301	OST4	-1.03659	1.45551e-10	antiCTR1	-1.50488	1.31842e-10	antiYDR506C	-1.01009	2.59333e-09	antiFMP48	2.20846	3.92261e-05	antiCBF2	-1.39107	2.85407e-09	antiMIS1	1.28331	7.17569e-08	TPO4	-1.20787	6.23422e-08	antiRPL36B	1.45026	1.77999e-10	HPF1	1.83861	7.54668e-13	antiTPO1	2.56996	5.47428e-15	OSW2	1.8388	0.0116048	ARG1	1.54051	1.13791e-17	antiARP5	-1.85741	2.4065e-06	antiYGL117W	-1.3105
YEA4	-1.11131	2.66619e-08	antiYOR052C	-1.53307	0.00173457	antiYLR218C	-1.2213	0.000169659	antiMSS11	2.89217	1.63353e-10	antiFMP16	-1.59201	1.44507e-10	antiRFC3	-1.18244	3.22853e-09	ANB1	1.52386	4.89818e-05	antiRPP1	-1.44447	3.25975e-09	antiPFK27	1.888	7.18181e-08	antiYNL146W	-1.82575	6.41385e-08	antiRRP1	1.17244	3.06342e-10	antiMIS1	-1.1945	8.01521e-13	antiVTC1	-1.82722	5.81932e-15	antiRSP5	1.64017	0.0121782	antiSIR3	2.34666	1.25265e-17	antiFMP24	-1.27646	2.4065e-06	antiVPS17	-1.85443
YNL277W-A	1.65162	3.11461e-08	antiYOR238W	-1.42914	0.00175301	DON1	1.14954	0.000169659	antiGTB1	-1.09197	1.74037e-10	antiPTR3	1.51526	1.45593e-10	antiYLR099W-A	-1.32099	3.26062e-09	FMP40	1.49587	4.89818e-05	antiBRN1	-1.87466	3.45521e-09	CNS1	1.27598	7.91852e-08	antiSPC97	-1.20678	6.62967e-08	antiRPS7B	2.07101	3.55826e-10	antiTIF4632	2.0314	8.91487e-13	antiYMR210W	-1.85878	7.29892e-15	antiCSF1	1.04338	0.0126968	ADE2	-1.06155	1.57422e-17	YJR008W	-1.19059	2.50585e-06	antiTHI3	-1.48176
YGR110W	1.82999	3.21776e-08	BUD27	1.03963	0.00175301	antiIDP2	-1.07807	0.000176354	antiSNL1	-1.07956	1.84894e-10	YSW1	2.55094	1.66192e-10	antiOSH2	-1.47541	3.43538e-09	antiYLR001C	1.1314	5.42143e-05	antiMPS2	-1.52933	3.53266e-09	antiRSM25	-1.40322	1.10173e-07	antiMET13	1.17813	7.03553e-08	antiCDC13	1.46094	3.88704e-10	CIT2	1.05021	1.53375e-12	antiNUT2	-1.84692	9.21104e-15	TEF1	-1.07971	0.0133242	HMS1	2.6925	1.89653e-17	antiTAF12	-2.46566	2.50585e-06	PLB1	1.24977
antiUFD2	-1.05915	3.50372e-08	antiPCC1	-1.4471	0.00201176	antiMEI4	-1.03644	0.000187275	MIR1	-1.06384	2.52859e-10	YCK3	1.03962	1.76204e-10	antiSNU71	-1.09244	3.62186e-09	antiGLC3	-1.04007	5.96795e-05	antiMSW1	-1.38507	3.58512e-09	NBP1	1.27614	1.13604e-07	HTA2	-1.02199	7.48928e-08	antiSGV1	1.61017	4.42506e-10	antiUSO1	2.24628	1.81113e-12	DSE1	1.17684	9.53421e-15	antiAFG2	1.25323	0.013516	YJR146W_HMS2	-1.47524	2.13691e-17	antiPEX10	-1.69523	2.52488e-06	antiQDR1	-1.64365
antiYPL113C	-1.05468	3.51319e-08	antiISW1	-1.11507	0.00211729	antiTIP1	1.18287	0.000197091	antiAGA2	2.11477	2.76626e-10	PRM2	2.78207	1.86392e-10	antiPXR1	-1.48687	4.48259e-09	PCK1	1.30858	6.27913e-05	antiPRR2	-1.41131	4.16157e-09	RPS11B	1.15366	1.1768e-07	THI20	-1.18905	9.48961e-08	antiSSK1	1.85447	4.51378e-10	GAT2	-1.95033	2.05921e-12	YLR149C	2.22646	1.21366e-14	antiSTP2	1.59052	0.0135658	RIX1	-1.30078	2.93274e-17	antiISW1	-1.56699	2.65454e-06	YGP1	-1.90652
antiYDR415C	-1.20747	3.98381e-08	antiCDC3	-1.28755	0.00211729	USE1	1.09591	0.000198197	antiNDT80	-1.17128	2.88372e-10	YHR177W	2.0694	2.1892e-10	antiIDP2	-1.16595	5.14741e-09	antiYPL105C	1.03858	6.64125e-05	antiRTT101	-1.30144	4.39432e-09	DIC1	1.34035	1.21158e-07	antiIDP3	-1.5817	1.00685e-07	antiPTA1	1.94794	5.50722e-10	IZH4	-1.90044	2.11316e-12	PMP2	-1.17215	1.29025e-14	antiRSA4	1.53993	0.0135765	antiSNL1	-1.81757	7.54844e-17	antiGSP1	-2.55411	2.86126e-06	RPL22B	-1.03362
antiGLC3	-1.04044	4.04853e-08	antiGFD1	-1.45328	0.00217006	antiECM19	-1.07994	0.000201448	antiUTP5	-1.15562	2.95533e-10	antiARA2	1.65298	2.65793e-10	antiSLI1	1.54328	5.81746e-09	GIT1	1.06461	7.13717e-05	MEP2	-1.41872	4.39432e-09	antiMOT3	1.22836	1.33823e-07	antiTNA1	1.79888	1.02747e-07	antiGPR1	1.58165	5.63102e-10	PMP2	-1.0799	2.47112e-12	antiYOR051C	1.34193	1.29734e-14	antiYCL047C	1.42992	0.0135765	antiYKL121W	2.25329	1.1879e-16	antiGIR2	-2.2385	3.13212e-06	antiPSD2	1.42944
AQR1	1.05836	4.07363e-08	antiRET2	2.68812	0.00217746	antiMRS11	-1.06288	0.000201448	antiSYF1	-1.09424	2.97073e-10	antiRAD30	1.62727	3.02843e-10	antiYKL115C	-1.17847	7.28355e-09	ALP1	1.07099	7.30355e-05	antiNMA2	-1.30223	4.45718e-09	CHS1	1.00182	1.44421e-07	antiVAC7	-1.415	1.08295e-07	antiAKL1	1.6087	5.88532e-10	ADR1	1.9415	2.72519e-12	HOR7	1.48661	1.32819e-14	antiHOR2	-1.14611	0.0136943	ILV2	1.02053	1.83838e-16	antiYLR049C	-2.34375	3.16555e-06	PEP4	1.21777
QDR1	-1.28577	6.06914e-08	antiYJR098C	-1.10468	0.00217746	antiBUB3	-1.02756	0.000201448	antiARA2	1.57698	3.47819e-10	RIM4	1.76723	4.1708e-10	antiRRM3	-1.02468	7.94228e-09	SOD1	-1.02084	7.42216e-05	antiAXL1	-1.82026	4.75861e-09	PIG1	1.38689	2.34891e-07	EXG1	-1.04919	1.11853e-07	antiMKS1	1.02895	6.08576e-10	antiYLL023C	-1.2017	3.81717e-12	RPS28A	-1.01432	1.56236e-14	antiUBI4	1.0167	0.0140635	antiSAM35	-1.90057	2.42572e-16	antiECO1	-1.79634	3.18151e-06	antiECM32	-1.33364
antiOPT2	-1.22502	7.96306e-08	antiFMP36	-1.36885	0.00227998	YPR036W-A	-1.22348	0.00021403	SLC1	-1.0861	3.84285e-10	antiAVT3	1.93121	4.24904e-10	antiLSC2	-1.17185	9.90368e-09	CRC1	2.40596	7.42216e-05	antiVMA13	-1.55907	4.8104e-09	STE11	1.03143	2.7988e-07	YNL211C	-1.54517	1.41041e-07	antiATG1	1.71118	6.32221e-10	antiTNA1	1.96296	4.37431e-12	ENB1	1.09318	1.81307e-14	antiVNX1	1.03379	0.0145095	antiYMR102C	3.46981	2.44489e-16	antiSNX41	-1.10086	3.18151e-06	antiLAP4	-2.42046
antiRAD26	1.68797	8.23214e-08	YOR287C	1.10865	0.00231778	BUG1	1.06811	0.000217826	antiYIG1	-1.00632	3.86428e-10	YOR1	-1.02662	4.9729e-10	antiAGA2	1.75823	1.33255e-08	SFG1	-1.00158	8.53368e-05	antiIKS1	-1.78405	4.95602e-09	VPS63_YPT6	1.04821	2.85874e-07	antiYLR099W-A	-1.62252	1.56533e-07	TVP15	-1.06396	6.52495e-10	YJL213W	-1.20968	4.96213e-12	antiGPG1	-1.89444	1.93432e-14	antiPRR2	-1.00744	0.0148914	GAR1	-1.06223	2.45842e-16	antiCTT1	-1.15601	3.18151e-06	antiSWC5	-2.81122
antiYOR097C	-1.24319	8.60026e-08	antiENT5	-2.33814	0.00231778	antiMDH2	1.09181	0.000229824	antiYLR036C	1.58841	4.24512e-10	antiELA1	-1.01247	9.30068e-10	antiYJL144W	-1.13663	1.35875e-08	UBP11	1.09874	8.97234e-05	antiERG27	1.79794	5.09047e-09	GAB1	1.102	3.38102e-07	GFD2	1.34215	1.64172e-07	antiUTP9	2.12455	6.6746e-10	antiMRN1	2.06475	6.03366e-12	antiGYP5	-1.43847	2.7849e-14	antiUFO1	1.071	0.0153038	antiTRS120	3.00678	2.80578e-16	antiMGM1	-2.14344	3.26425e-06	DAN4	1.53382
antiGYP8	1.69206	8.65503e-08	CAD1	1.17001	0.00236791	antiYCR051W	-1.06241	0.000229824	antiSLI1	2.11131	4.80039e-10	YKR015C	2.36187	9.59529e-10	antiDUR1%2C2	1.05266	1.62964e-08	antiYLR278C	-1.10762	9.50452e-05	antiCIK1	-1.38928	5.13277e-09	antiCIK1	-1.18642	3.71763e-07	antiQDR1	-1.25268	1.67082e-07	antiMDH2	1.89665	7.75941e-10	antiSVL3	2.47702	6.54914e-12	RNR4	1.32534	2.79034e-14	antiVPS8	1.17066	0.0153038	YPR036W-A	1.61804	2.96258e-16	antiGCD2	-2.30425	3.47694e-06	antiIPT1	2.03301
antiCAF120	1.17734	8.65503e-08	antiCDC21	-1.32867	0.00238304	RRP15	1.11062	0.000229824	AMS1	1.42033	5.58172e-10	antiYOR238W	-1.41783	1.10443e-09	antiBDH2	-1.17141	1.83041e-08	YJL133C-A	4.62768	0.000101016	antiLEO1	-1.45807	5.37913e-09	antiLEO1	-1.69036	4.37038e-07	YLR364W	-1.12762	2.01727e-07	antiTIP1	1.28447	8.6536e-10	AQY1	2.16284	6.66098e-12	antiYOR238W	-1.95739	2.92044e-14	antiRSA1	1.55844	0.0157649	antiSAG1	1.86126	4.31411e-16	antiSPT5	-1.6146	3.50751e-06	GPH1_YPR160W-A	2.32051
antiTPM1	-1.33439	9.5527e-08	antiRPL31A	-1.47911	0.00254961	antiSAP30	-1.20975	0.000229824	YDR119W-A	1.95821	5.86947e-10	YDR119W-A	1.92719	1.22459e-09	antiATG22	1.82455	2.02538e-08	antiFAA2	1.1787	0.000105394	antiSET2	1.58801	5.74804e-09	YBR056W	1.00542	4.43969e-07	antiYNL095C	-1.0366	2.13274e-07	antiFRE6	2.07693	9.17922e-10	CLN2	-1.13507	7.37002e-12	DAN4	1.27575	3.11385e-14	antiARG80	-1.27714	0.0160069	antiYNL035C	-1.62181	5.25937e-16	MFA2	1.01961	3.68689e-06	ZRG8	1.45052
SRY1	1.16896	1.03069e-07	CWC15	1.44961	0.00282486	antiYML037C	-1.01279	0.000230194	antiCTT1	-1.09878	7.74397e-10	IME4	3.32468	1.42953e-09	ACP1	-1.00369	2.53582e-08	antiPXL1	1.16186	0.000105394	antiMNT2	1.79741	5.77483e-09	antiCRR1	-1.44626	5.07862e-07	YER071C	-1.39547	2.15733e-07	antiLCB1	1.55993	9.6467e-10	NAP1	1.06991	7.6912e-12	NTH1	1.14466	3.11385e-14	antiGLO4	-1.21825	0.0162747	TMA7	-1.18939	6.72734e-16	antiYGR283C	-1.09861	3.68689e-06	YAT1	1.89819
antiYLR404W	-1.11975	1.03367e-07	antiYNL024C	-1.19152	0.00282486	antiYGR035C	1.5139	0.000231346	antiYCL058W-A	-1.18169	8.17103e-10	antiOAR1	-1.04887	1.85518e-09	antiYNL176C	1.824	2.53594e-08	antiBNA5	1.18171	0.000108029	HFM1	1.07918	6.61422e-09	antiPEX14	-1.5191	5.97012e-07	SPC1	-1.11085	2.4404e-07	antiPBS2	1.29247	1.03357e-09	antiTAF2	-1.58281	7.90329e-12	RPN4	-1.18594	3.88152e-14	EFT2	-1.00396	0.0169535	antiRAD2	2.07685	6.94571e-16	antiRPN11	-1.40927	3.7621e-06	MFA2	-1.52207
antiSUB1	-1.0287	1.14124e-07	antiPEX19	-1.19381	0.00293657	antiYOR238W	-1.1732	0.000231346	antiYCR061W	1.87728	8.39648e-10	antiYNG2	2.19186	2.2106e-09	antiSUB1	-1.03591	2.75414e-08	TFS1	1.00516	0.000110033	antiDCN1	-1.47986	7.44413e-09	CDC25	1.21374	6.79618e-07	antiHMO1	1.57119	2.52439e-07	antiPLB2	2.17142	1.09726e-09	APT2	-1.00425	8.1233e-12	antiERV2	1.35488	4.15975e-14	antiANB1	-1.316	0.0178565	antiYGL146C	-1.40267	7.26492e-16	antiNOP15	-1.0661	4.14067e-06	PST2	1.37262
YJL045W	1.68116	1.14124e-07	antiGPM1	-2.30489	0.00293657	YDR132C	1.07856	0.000246272	antiKAP122	2.20992	9.03069e-10	antiYGL082W	1.98513	2.58089e-09	antiYER163C	-1.20328	3.59993e-08	antiCDC20	1.57351	0.00011199	JEN1	2.11707	7.44413e-09	NOP14	1.0533	6.94906e-07	ADY4	-1.029	2.97176e-07	antiPGA3	1.27233	1.48824e-09	GUK1	-1.02797	8.29611e-12	GPM2	1.99931	5.66067e-14	antiEMP70	1.77995	0.0178651	antiDAP2	-1.56155	8.33902e-16	antiSIP5	-1.98134	4.21211e-06	antiFMP12	-2.17587
SWT1	-1.21519	1.2252e-07	antiGLG1	-1.24128	0.00296097	antiMDG1	-1.07382	0.000253708	TVP15	-1.03656	9.15791e-10	antiCTI6	-1.19537	3.33949e-09	antiVMA8	-1.04534	4.50207e-08	YJR146W_HMS2	-1.0292	0.000115031	antiRPL36A	-1.13824	7.48012e-09	antiHEM15	-1.64223	6.96858e-07	YLR257W	-1.11035	3.08402e-07	antiSLM3	1.37481	1.48911e-09	antiTRR1	1.58464	8.5447e-12	RPI1	-1.4784	6.56431e-14	PHM6	-1.50917	0.018373	antiSLT2	2.28837	1.00299e-15	antiHLR1	-2.00105	4.22391e-06	antiTCB3	1.69468
AMS1	1.22169	1.37553e-07	antiYGR169C-A	-2.04506	0.00296799	antiSPO7	-1.22263	0.000260802	GAT1	-1.08204	9.21182e-10	YOL013W-A_tP(UGG)O1	-1.46495	3.60473e-09	antiSEC6	1.22472	5.65016e-08	antiHMG1	1.89134	0.000115031	antiTAF2	-1.10271	7.5966e-09	antiGTB1	-1.22191	7.90617e-07	GPX2	-1.17845	3.38556e-07	antiITR1	2.04908	2.06485e-09	BAR1	-1.29555	1.08461e-11	NOP10	-1.10743	6.78494e-14	RPL18A	-1.00339	0.018373	LAP4	1.42822	1.09795e-15	antiMRP51	-1.95169	4.24978e-06	ADH1	1.24394
antiPRP19	-1.0447	1.821e-07	antiYOL114C	-1.41296	0.00296799	YGR169C-A	1.02851	0.000267703	ISU2	-1.00966	1.00967e-09	NQM1	1.97034	3.60984e-09	antiPSP2	1.74107	5.65016e-08	antiDAN4	1.38115	0.000117004	BTN2	1.19807	7.85205e-09	YKL106C-A	-1.16818	8.17942e-07	antiRET2	1.90094	3.46595e-07	antiMMR1	2.04623	2.10315e-09	MRF1	-1.2703	1.32429e-11	antiYOR186W	-1.5548	7.15288e-14	antiYDJ1	1.09109	0.018373	IPI3	-1.08068	1.09795e-15	antiPTI1	-1.39349	4.62503e-06	antiPOP3	-1.80085
antiPHO23	-1.13579	1.91857e-07	antiKRR1	-1.23042	0.00296799	antiSCJ1	-1.04072	0.00027564	PRM2	2.70358	1.06897e-09	antiTIM9	-1.49286	3.60984e-09	antiMAK10	-1.58056	5.94679e-08	antiMRPL24	-1.60563	0.000119516	antiMIG3	-1.32888	8.35366e-09	BUG1	1.21532	8.22786e-07	MET30	1.42197	4.28355e-07	antiFMS1	1.44003	2.85826e-09	GPI14	-1.13143	1.68088e-11	antiBUB3	-1.56348	8.01359e-14	antiNRG1	-1.12457	0.018373	RPA49	-1.23641	1.18435e-15	antiYOR097C	-1.4508	4.62503e-06	antiAAT2	-1.38764
antiTRR1	1.15814	1.93387e-07	antiRRP46	-1.10173	0.00298045	antiDAD4	-1.38946	0.000278174	antiYLR099W-A	-1.45093	1.19721e-09	antiVMA8	-1.11061	4.52127e-09	antiCRR1	-1.08832	6.04365e-08	antiYNL200C	1.26014	0.000120462	antiCBK1	-1.1097	1.13229e-08	antiPDX1	-1.12683	1.08985e-06	RIF2	-1.24231	4.50834e-07	antiSCH9	1.81475	2.87061e-09	antiBSP1	2.03307	1.71124e-11	antiVMA8	-1.57723	8.40997e-14	antiUTP10	1.75101	0.018373	CUP5	-1.08501	1.64647e-15	antiPDR16	-1.56867	4.8001e-06	YFL052W	2.14853
SNO1	2.31632	2.10246e-07	TAF7	1.41449	0.00304443	antiKAR4	-1.11496	0.000297333	antiRPL40B	-1.31224	1.33029e-09	antiTAF9	1.94181	5.35913e-09	GIP1	1.51544	6.10299e-08	antiCOT1	-1.08394	0.000120462	antiMSE1	-1.6107	1.19321e-08	FIT3	1.91503	1.1073e-06	IZH4	-1.26524	4.6168e-07	antiPET9	1.72758	2.87571e-09	YGR146C	-1.20921	1.72942e-11	antiNSL1	-1.50459	1.00508e-13	antiCDC10	1.71719	0.018961	antiYGR110W	-1.77886	1.77211e-15	antiGZF3	-2.79173	4.87077e-06	antiSEC20	2.07258
antiPLB2	1.89514	2.21972e-07	IPL1	1.33793	0.00313273	antiADD37	-1.10046	0.000311298	antiFLC1	-1.02721	1.43101e-09	antiYCR061W	1.80983	5.42361e-09	antiMGS1	-1.21345	6.13781e-08	antiCOX14	1.74866	0.000129142	antiMKC7	-1.36422	1.93233e-08	antiCBF2	-1.47062	1.1174e-06	TPO2	-1.50208	5.03773e-07	antiMAG2	1.84221	4.04741e-09	YKL071W	2.13954	1.94452e-11	YLR042C	-1.41654	1.00508e-13	antiUSE1	1.63744	0.0189668	DAL3	1.72785	1.99548e-15	antiTMN3	-1.55054	5.1622e-06	RMI1	-1.79414
antiFOB1	1.13853	2.51056e-07	antiFYV4	-1.34325	0.00320399	antiFMP36	-1.19125	0.000311298	YGL081W	1.99568	1.52872e-09	antiYNL134C	-1.35194	7.15281e-09	antiYCR051W	-1.09629	6.17353e-08	antiESC8	1.14281	0.000129142	antiCFD1	-1.37514	1.93233e-08	RRP15	1.10113	1.15606e-06	antiSSY5	-1.08776	5.73959e-07	antiVPS3	1.84007	4.09624e-09	antiMDL1	2.31139	1.94452e-11	AGA1	-1.66025	1.00508e-13	antiFAR11	1.16035	0.020379	YBR085C-A	1.19655	2.82197e-15	antiYNL140C	-1.79514	6.94358e-06	LAP3	1.14336
antiMBP1	-1.08642	2.52613e-07	CWC24	1.19341	0.00321108	antiNAB2	1.24304	0.000417231	antiHOR2	-1.20752	1.6211e-09	antiPGA3	1.29073	7.93192e-09	FRE7	1.31063	6.82362e-08	antiPCK1	2.17478	0.00013279	DEF1	1.53684	1.93233e-08	antiDLD1	-1.43994	1.21285e-06	antiGID7	1.34113	5.79826e-07	antiBET4	1.31807	4.5665e-09	DIC1	-1.39722	2.11918e-11	antiYNL217W	-1.79731	1.1126e-13	EBP2	1.10338	0.0203893	UTH1	1.16271	2.82384e-15	antiHED1	-1.9893	6.95208e-06	antiICL1	-1.26661
antiPOL4	-1.11687	2.63472e-07	YBR108W	1.29697	0.00321108	antiHAL1	1.22323	0.000444809	RLF2	-1.33857	1.65421e-09	antiGSP2	1.48616	8.24259e-09	antiAVT3	1.57205	7.2915e-08	THI2	1.56262	0.000136383	BBC1	1.07096	2.65166e-08	CHA1	1.1622	1.21541e-06	antiBUB3	-1.07475	5.86946e-07	antiGYP7	1.27728	5.13467e-09	antiMGR1	1.828	2.87426e-11	PGM2	1.65904	1.1126e-13	antiYOR051C	-1.2151	0.0217315	antiQDR1	-1.6776	2.93665e-15	antiBDF2	-2.53039	7.3881e-06	antiPSY2	2.27884
antiSEC18	1.56773	2.72058e-07	antiHOS4	-1.04024	0.00321108	antiYER128W	-1.07791	0.000476212	antiCTI6	-1.17589	1.71497e-09	antiSKG3	2.76825	1.05204e-08	antiESS1	-1.03856	7.35876e-08	antiLEO1	1.37992	0.000152717	antiATP3	1.69925	2.83963e-08	GSP1	1.02969	1.22204e-06	ICY1	-1.10432	6.24815e-07	YRO2	1.3796	5.75138e-09	OST4	-1.10664	3.07394e-11	antiPDX1	-1.53963	1.43181e-13	antiCHA1	2.23446	0.0224562	GDS1	1.18333	2.97019e-15	antiYOX1	-1.83818	7.67866e-06	antiHMF1	-1.7661
antiSLM5	-1.32078	2.94414e-07	antiTRX1	-1.36814	0.00321108	antiHXT5	1.28534	0.000490112	antiVCX1	1.07624	1.7438e-09	ICY1	-1.12747	1.05204e-08	antiYPR145C-A	-1.53678	8.85812e-08	antiRIB2	1.3068	0.000166919	antiSNF6	-1.56269	2.85294e-08	antiSLM5	-1.37343	1.27892e-06	HSP12	2.26574	6.34223e-07	FRE5	1.63876	7.48523e-09	YGL039W	-1.16044	3.11237e-11	WTM1	1.09204	1.73977e-13	antiCOP1	3.43087	0.022583	antiNUP1	1.96707	4.86409e-15	antiFMP38	-1.38254	7.92455e-06	MET13	1.98437
antiNMD5	1.46013	2.94783e-07	antiMRPL9	-1.34169	0.0032324	antiIRS4	-1.11533	0.000513745	antiGAD1	2.39053	1.84242e-09	antiABP140	1.6332	1.1409e-08	antiPGA3	1.11015	9.06508e-08	antiHXT2	2.05258	0.000172332	PRB1	1.42662	3.24113e-08	antiPXR1	-1.76167	1.29823e-06	RPI1	-1.01235	6.34616e-07	antiGPD1	1.71762	7.76356e-09	OAC1	-1.73142	3.58696e-11	antiIRA1	2.00917	2.1589e-13	antiPWP2	1.50428	0.0227756	ADE5%2C7	-1.1171	4.95797e-15	antiYLL020C	-1.19243	8.25284e-06	antiCDC13	1.66427
antiSDS3	-1.16063	3.04643e-07	YNR062C	2.01073	0.00325881	antiMRPS17	-1.19537	0.000513745	YJL118W	-1.08418	1.97081e-09	GAL2	1.88626	1.29058e-08	YIL020C-A_HIS6	1.02056	1.11537e-07	DIT1	2.003	0.000225607	INP52	1.01637	3.78274e-08	antiYPL077C	-1.29359	1.57491e-06	DFG10	-1.01341	6.75319e-07	antiRPS16B	1.35399	9.48817e-09	HHF2	-1.26332	4.0881e-11	antiHMF1	-1.83233	2.32229e-13	antiSRL1	1.41622	0.0228552	antiGDS1	3.22685	7.22601e-15	antiTFA1	-1.06118	8.28341e-06	antiYDR063W	-1.97191
antiYNL024C	-1.15931	3.68789e-07	antiCYB5	-1.14494	0.00331785	antiDSE2	1.1965	0.000549459	TOM7	-1.03025	2.03245e-09	antiPXR1	-1.5652	1.51737e-08	antiHAP5	-1.18649	1.67198e-07	antiSTR3	1.24022	0.000226275	TDH1	1.62956	3.9792e-08	SKI2	1.13135	1.65328e-06	YOR032W-A	-1.19342	7.13225e-07	antiNOC4	1.9797	1.06591e-08	antiSPC97	-1.2142	4.74532e-11	BAR1	-1.61837	2.4703e-13	MRC1	1.20387	0.0231758	YNL155W	-1.37519	7.33643e-15	antiPEP1	-2.17135	8.6105e-06	antiSNU71	-1.62079
antiPEP12	-1.32775	3.85489e-07	antiHRP1	-1.6995	0.00331785	SCM3	1.17712	0.000550372	antiYNG2	2.15495	2.0819e-09	YNR064C	2.37929	1.76101e-08	antiSER33	-1.08677	1.72273e-07	antiSTE3	2.41328	0.000250015	antiSRP102	-1.27387	4.30816e-08	antiIMD3	1.65	1.79708e-06	KNH1	-1.42466	7.13419e-07	antiSAC6	2.25182	1.38594e-08	antiYOR052C	-1.62946	4.82429e-11	GAP1	1.22266	2.59243e-13	antiDNF1	1.10969	0.0231758	YER053C-A	2.50058	9.21774e-15	antiSPT20	-1.92015	8.8033e-06	antiWRS1	-1.45841
antiYFR012W	1.78666	5.5532e-07	antiNCB2	-1.05521	0.00347646	antiPHO4	-1.19605	0.000552437	antiTMA17	-1.82381	2.7562e-09	antiYOL092W	2.94064	1.78552e-08	antiPDR8	-1.03686	2.12161e-07	antiMGS1	-1.13427	0.000264553	SPO12	1.8088	4.44376e-08	antiAYR1	-1.24817	1.81033e-06	antiRAT1	-1.25999	7.13419e-07	antiPDE2	2.32427	1.54584e-08	antiGLC3	-1.39117	5.01357e-11	antiESS1	-1.53338	2.9635e-13	antiWHI4	1.27039	0.0238773	antiRPB11	-1.33277	9.3025e-15	antiDSS1	-2.22943	8.8033e-06	antiOAR1	-1.6136
antiTCB3	1.25878	5.82364e-07	TVP15	-1.08714	0.00357086	antiYBR261C	-1.05547	0.000649605	YBR116C_TKL2	1.96326	3.10416e-09	SLC1	-1.00847	1.78552e-08	antiPOL4	-1.00892	2.13157e-07	antiMSC2	-1.08107	0.000276742	antiYER088C-A	-1.20556	4.8229e-08	antiOYE3	-1.21637	2.1301e-06	GIT1	-1.74601	7.13419e-07	antiDBF2	1.10293	1.83421e-08	antiSMC2	2.24947	5.78629e-11	antiMEP3	1.7097	3.09639e-13	antiCDC55	1.47258	0.0238773	ARE2	1.12034	1.27515e-14	antiMSN1	-1.42229	8.8033e-06	PYC2	1.18005
antiAFR1	-1.12073	7.64475e-07	YIL161W	1.21815	0.00357086	antiALF1	-1.14582	0.000706668	MCR1	-1.16706	3.24858e-09	antiVPS33	-1.12182	1.80211e-08	YIL161W	1.00706	2.56593e-07	PDC6	2.10951	0.000278733	antiPUS9	-1.83486	5.15404e-08	antiRHO2	-1.53403	2.30086e-06	NAP1	1.3466	7.19701e-07	antiRPS9A	1.2269	1.90318e-08	THI20	-1.27635	6.17127e-11	antiWHI5	-1.68617	3.42073e-13	antiMDL1	1.22515	0.0239277	FTR1	1.48989	1.29265e-14	antiPFK2	-3.86028	9.05096e-06	antiCIN2	-1.27513
antiSAP30	-1.42054	8.04217e-07	antiGIR2	-1.40358	0.00359498	antiRPL8B	-2.21778	0.000729857	antiVPS33	-1.15896	3.6509e-09	antiGAD1	2.31317	1.80211e-08	antiDIC1	-1.02126	2.73274e-07	SIP4	2.07505	0.00029145	antiYDL057W	-1.58694	6.09726e-08	IKI3	1.10563	2.32792e-06	YPR146C_YPR147C	-1.11444	7.36191e-07	NCA3	1.03129	1.97777e-08	CSH1	-1.14433	6.17127e-11	antiVPS33	-1.63808	3.46175e-13	antiYLL054C	1.45938	0.0246456	UTP23	-1.33812	1.61463e-14	antiMNI2	-2.47237	9.82124e-06	antiPDX1	-1.6193
antiYGR251W	-1.25607	8.16967e-07	antiMRPL32	-1.10943	0.00359498	antiPAC10	-1.17417	0.000742252	antiYKL115C	-1.36224	3.81601e-09	antiAGA2	2.01221	1.87027e-08	SYF2	1.02194	2.79196e-07	antiCYC3	1.34983	0.000312118	CHA1	1.16288	6.09726e-08	MAL33	-7.62674	2.78703e-06	EST3	-1.23608	7.6851e-07	antiYDR128W	1.29832	2.09098e-08	antiSEF1	1.93471	7.23427e-11	antiTIF1	-2.03003	3.49793e-13	antiSPB1	1.1864	0.0252068	antiPRP43	2.72885	1.70268e-14	antiYDR348C	-1.28889	1.01678e-05	HEF3	1.50972
antiYPR115W	1.2673	9.71578e-07	SGV1	1.17181	0.00364846	EMP46	1.01242	0.000742252	antiHNM1	1.07319	3.98117e-09	antiRSM25	-1.21544	1.87213e-08	antiSGT2	-1.24417	2.82741e-07	antiYNL194C	1.28956	0.000312118	antiVMA9	-1.07825	6.12301e-08	YOR385W	1.23565	2.80927e-06	antiRAD30	1.40573	8.09386e-07	antiGUT1	1.41305	2.31338e-08	antiMNT2	2.17578	7.65307e-11	LAP4	1.38579	3.73974e-13	antiSAM50	1.30173	0.0259685	GTO3	2.41492	1.79088e-14	FBA1	1.00773	1.04939e-05	YMR182W-A	-1.20553
antiMRPL11	-1.45133	9.87863e-07	PRP21	1.18902	0.00373517	antiLYS20	-1.06582	0.000747958	antiKSS1	-1.08053	4.002e-09	GIP1	1.73228	2.28518e-08	MCR1	-1.00981	2.88901e-07	antiTHI2	1.78713	0.000321434	antiPOR2	-1.2541	7.71164e-08	CTR9	1.05502	3.26596e-06	DCI1	-1.14449	8.84713e-07	antiLCB2	1.51447	2.64535e-08	antiVMA8	-1.53329	8.9881e-11	antiUMP1	-1.84501	4.26938e-13	antiDHH1	1.82944	0.0264626	antiPRE1	-1.73159	2.03946e-14	IMP2'	1.00699	1.0581e-05	CPA2	1.01363
FRE7	1.31127	1.10628e-06	antiLSM4	-1.79693	0.00391572	antiYNL195C	-1.36366	0.00076996	antiJJJ1	-1.19893	4.22772e-09	antiDYN2	-1.3024	2.3869e-08	antiSSH1	1.24841	3.01662e-07	SEO1	1.87948	0.000324513	antiPDR8	-1.23774	8.38056e-08	SUP45	1.1206	3.5845e-06	antiYMR160W	-1.21892	9.16181e-07	antiYDR049W	2.11367	3.22149e-08	antiERV1	-1.66388	9.23836e-11	antiDIC1	-1.55243	4.93983e-13	antiSSY1	1.48331	0.0269902	antiUTP21	1.7273	2.59858e-14	antiADE16	-1.26284	1.121e-05	antiYGR283C	-1.95063
antiFRE6	1.80439	1.10848e-06	antiARP8	-1.09258	0.00391584	antiBRN1	-1.03117	0.000858326	RIM4	1.68082	4.26654e-09	antiVAM6	1.73887	2.42928e-08	antiABP140	1.33563	3.28784e-07	YNR071C	1.92116	0.000330181	antiRBG2	2.46178	8.61035e-08	antiPAN5	-1.58312	3.82441e-06	TYW3	-1.00822	9.49346e-07	antiSBE2	1.44123	3.22149e-08	antiARG80	-1.58439	1.1036e-10	CIT2	1.53632	6.4482e-13	antiBOI1	1.2712	0.0270626	MAK16	-1.35964	3.0993e-14	antiBMS1	-2.58076	1.19568e-05	antiRRM3	-1.52588
antiYCR095W-A	1.70396	1.21975e-06	antiMRPS17	-1.05699	0.00393921	antiCGR1	-1.0225	0.000887315	antiYNL217W	-1.31008	4.29832e-09	antiENT3	1.81896	2.82423e-08	antiYDL199C	1.49024	3.58023e-07	TPO2	-1.09829	0.000333712	antiPET494	-1.71462	9.10322e-08	antiYGL108C	-1.54198	3.91768e-06	FRE5	1.63052	9.56168e-07	antiSIZ1	1.07388	3.27859e-08	ERG26	-1.064	1.14277e-10	antiELA1	-1.32303	9.31638e-13	antiAQR1	1.34162	0.0274236	PIR3	1.51973	3.26855e-14	antiPSF3	-1.54448	1.23253e-05	YPL230W	1.97723
antiROG3	2.07262	1.22473e-06	CUS1	1.08801	0.00395045	YJL133C-A	-1.04924	0.000967273	antiFET3	1.30259	4.7394e-09	antiATG22	2.01991	2.88284e-08	antiSPS4	1.39623	3.6554e-07	BMH1	-1.09547	0.000347877	COS12	1.8639	9.55107e-08	antiIPP1	-1.14596	4.20272e-06	TUB3	1.27695	9.5853e-07	antiYSP1	1.12358	3.35695e-08	EHT1	-1.40763	1.26125e-10	GPH1_YPR160W-A	1.83874	1.07317e-12	antiSEC61	1.00532	0.0275797	FPR4	-1.16533	3.97703e-14	antiPEA2	-1.56368	1.23782e-05	antiFMP45	1.8951
antiMXR1	-1.2744	1.25108e-06	antiTIM13	-1.03675	0.00396078	antiHAP5	-1.03548	0.000978988	antiFMP48	2.63035	4.7394e-09	antiMSA2	1.39283	2.95543e-08	YHR177W	1.54508	3.66378e-07	YER187W	1.89174	0.000348486	antiWHI5	-1.97127	9.91916e-08	antiSNF5	2.85641	4.40659e-06	antiYOR052C	-1.37289	1.11784e-06	antiUBX7	1.33963	3.59823e-08	YNL305C	1.15228	1.32361e-10	SUR4	-1.01536	1.09531e-12	YPR145C-A	1.90851	0.0281532	antiCDC25	2.519	4.44595e-14	antiYOR203W	-2.50265	1.30188e-05	antiADE6	1.73283
antiTUF1	-1.00367	1.51258e-06	antiCOT1	-1.12813	0.0043593	antiDBP8	-1.00011	0.00102267	HSP12	2.46404	5.44067e-09	antiYNL217W	-1.21331	3.30345e-08	antiMRH4	1.42387	3.75637e-07	LSM8	-1.10766	0.000365156	antiMLH2	-1.72679	1.02463e-07	antiCTI6	-1.14068	4.63392e-06	antiGDH2	-1.31041	1.12311e-06	antiCET1	1.52215	3.95842e-08	antiRAD30	1.67954	1.34165e-10	antiEPL1	-1.20112	1.12186e-12	antiIQG1	1.29128	0.0297275	antiDYN1	1.69015	4.56108e-14	antiSRB5	-1.96801	1.35076e-05	antiNSL1	-1.35796
antiFCP1	1.55371	1.89501e-06	antiCHS5	-1.02828	0.00442633	IPL1	1.15377	0.0010253	antiHMO1	1.58182	5.448e-09	antiYPR145C-A	-1.80797	3.7913e-08	antiFMP26	1.33806	4.42074e-07	antiYBR239C	1.08831	0.000376282	TPO1	-1.51712	1.05302e-07	RPB5	1.47059	5.14773e-06	SPO73	-1.0511	1.29276e-06	antiYEL007W	1.68961	4.07651e-08	YDR367W	-1.34819	1.51704e-10	antiBIK1	-1.63044	1.12186e-12	antiADP1	1.68397	0.0300428	IZH4	-1.78606	5.11511e-14	antiMRS2	-1.99673	1.36323e-05	antiNUP1	1.78117
antiPDR17	-1.26498	2.50317e-06	antiYNL217W	-1.27514	0.00442633	antiMEH1	-1.05027	0.00105668	YKR015C	2.29887	6.73021e-09	antiSUB1	-1.06446	3.98942e-08	SIP4	1.83398	4.47604e-07	YLR149C	1.61427	0.000376547	antiYNR018W	-1.39172	1.22014e-07	antiKAR4	-1.35104	5.40718e-06	antiTHI3	-1.099	1.35475e-06	antiFLO8	1.80302	4.07903e-08	antiLYS20	-1.35521	1.551e-10	antiYGL117W	-1.27748	1.58572e-12	YCR016W	1.23795	0.0301491	RPB9	-1.32533	6.41103e-14	antiMMT2	-1.51842	1.40477e-05	antiTSC10	-1.8194
antiCRR1	-1.065	2.5846e-06	FIT2	1.40147	0.00451315	antiCUS1	-1.05544	0.00107187	antiOST3	1.46574	8.26019e-09	antiMNT2	1.7254	4.08623e-08	antiPDC1	-1.47093	4.67977e-07	antiAKR2	-1.02728	0.000399913	antiATS1	2.19564	1.22014e-07	YDL241W	1.08452	6.24567e-06	antiBRN1	-1.65814	1.38466e-06	antiYCR023C	1.1043	4.09424e-08	antiYBR219C	1.67657	1.85349e-10	CHA1	1.21806	1.90101e-12	antiYDR049W	1.28749	0.0301491	antiYLR108C	2.73661	6.41103e-14	antiDPS1	-3.5648	1.45103e-05	APQ12	-1.33825
antiYBR141C	-1.06383	2.61703e-06	antiRPL41A	-1.26348	0.00459694	YKL107W	1.11957	0.00119083	CDA1	2.65833	8.26447e-09	antiTCB3	1.40162	4.08675e-08	antiDAM1	1.08932	5.65809e-07	antiYJL038C	1.35007	0.000403173	antiMPM1	-1.47216	1.24973e-07	antiYPL056C	2.15808	6.66972e-06	antiPHO8	1.70292	1.4215e-06	RGM1	1.03917	4.16552e-08	ARG3	1.94378	2.00827e-10	antiMEI4	-1.59291	1.9917e-12	antiYDC1	1.73475	0.0301491	antiYKR011C	-1.49046	6.54559e-14	antiRPS8B	-2.83661	1.51462e-05	HBN1	2.02912
antiYNL134C	-1.03257	2.67714e-06	BUG1	1.36512	0.00459773	antiSIR1	-1.19939	0.00123327	antiYDR506C	-1.06076	8.82311e-09	YJL045W	1.79566	4.36966e-08	antiYNG2	1.77819	6.63016e-07	antiRTN2	1.77028	0.000406308	FUN12	1.15381	1.27748e-07	antiHMF1	-1.20914	7.35889e-06	RIM8	1.05916	1.46112e-06	antiARF1	1.441	5.17755e-08	antiNPC2	1.28643	2.58539e-10	antiRPL36A	-1.60548	2.03542e-12	antiBBP1	1.21945	0.0313066	LSM6	-1.12223	7.69741e-14	antiWHI5	-1.21592	1.5228e-05	antiMDH3	2.23799
antiYDR063W	-1.07244	2.73829e-06	antiRPL29	-1.39431	0.00464328	antiGPM1	-1.92664	0.00161375	antiATG2	1.7872	1.02859e-08	antiCTT1	-1.03862	4.41997e-08	antiARO4	-1.14704	6.63016e-07	PRM2	2.03009	0.000406308	YBL095W	-1.15207	1.36493e-07	KAP104	1.03168	7.51703e-06	antiPOR2	-1.29259	1.49209e-06	antiNUM1	1.39672	5.23154e-08	antiARO80	1.57208	2.60538e-10	antiPHO85	-1.37166	3.33758e-12	antiSEC23	1.35555	0.0317127	YBL028C	-1.45277	8.04929e-14	antiFUN12	-2.74644	1.64209e-05	antiYOR262W	-1.62502
antiYMR160W	-1.01567	2.91299e-06	antiSSH1	1.37551	0.0046558	antiTIM9	-1.06119	0.00162485	YPL189C-A	-1.03338	1.14766e-08	antiSTU2	-1.03964	4.54542e-08	antiGUT1	1.19163	6.80502e-07	NDE2	1.51318	0.000410143	antiLUC7	-1.49609	1.55408e-07	CHZ1	1.23802	7.71281e-06	antiYGL146C	-1.03244	1.59628e-06	antiDUR1%2C2	1.10733	5.30278e-08	YOR285W	1.11855	3.17966e-10	BDH2	1.30622	3.56935e-12	antiPUB1	1.09299	0.0317127	HGH1	-1.09613	1.04343e-13	antiNAB3	-2.80864	1.72915e-05	QNQ1	2.51526
antiSCD6	-1.67806	3.33997e-06	antiTRS130	-1.02195	0.00474504	antiTSA2	-1.02701	0.00167031	RUD3	1.43417	1.19596e-08	antiPOL4	-1.13087	4.67496e-08	antiRAD30	1.21308	6.86797e-07	CDA1	2.45579	0.000484372	antiYPL158C	-1.45663	1.55408e-07	YLR361C-A	1.49586	7.85119e-06	YOL159C	-1.46058	1.59878e-06	antiDYN1	1.11082	5.30278e-08	YCR007C	-1.40995	3.30402e-10	PEP4	1.16575	3.82078e-12	antiYBR238C	1.51304	0.0317485	antiAPE2	-1.47275	1.15818e-13	CDC19	1.13202	1.90479e-05	antiMSC2	-2.05299
antiYBR219C	1.20745	3.44204e-06	antiNPC2	1.16768	0.00477289	antiSPC29	-1.19258	0.00167491	ICY1	-1.03686	1.22901e-08	antiBUR6	-1.62899	5.17106e-08	antiTMN2	1.00169	7.16439e-07	antiMSR1	-1.17949	0.00049662	antiAVL9	1.43883	1.66101e-07	antiSNU71	-1.35795	8.17451e-06	PCA1	1.12613	1.70148e-06	YKL071W	1.70923	5.83347e-08	antiYLR042C	-1.31179	3.36144e-10	antiCDD1	-1.50333	4.21013e-12	antiCAF20	-1.20756	0.0321379	GLN4	-1.10171	1.37299e-13	antiKRI1	-1.4614	1.94963e-05	YFL054C	1.77566
antiFMP24	-1.00037	3.76229e-06	antiSAS10	-1.59511	0.00488411	antiMOG1	-1.04339	0.00167759	YOL013W-A_tP(UGG)O1	-1.4084	1.36985e-08	MCR1	-1.07936	5.21382e-08	GPM2	1.32485	7.33605e-07	antiHEM15	-1.064	0.000505202	KAR3	1.43117	1.70067e-07	antiMLS1	-1.04629	8.42793e-06	antiTRM13	1.14326	1.70148e-06	antiSWI3	1.40114	6.93447e-08	antiMET13	1.2754	3.63449e-10	antiSIA1	2.28791	4.47999e-12	YCL058W-A	1.50323	0.032213	TRM13	-1.05571	1.40514e-13	antiYLF2	-1.25903	1.95914e-05	PCL9	-1.26515
antiYHR182W	1.00953	3.76229e-06	YKL023W	1.2818	0.00491661	antiYSF3	-1.05977	0.00173606	antiRAD30	1.49086	1.61448e-08	antiYLR099W-A	-1.34444	5.72169e-08	antiSEC61	2.11118	7.33605e-07	antiYMR206W	1.29334	0.000505202	SDH2	1.02891	1.81991e-07	ARL1	1.13001	8.80486e-06	antiPRM2	-1.40764	1.85005e-06	HMS1	1.89979	7.09132e-08	antiRIF2	-1.1871	3.7864e-10	antiYLR412W	-1.26007	4.78699e-12	antiECM40	1.13386	0.03257	antiAAT2	-1.43779	1.45058e-13	antiERV2	-1.14183	1.98016e-05	antiASH1	-1.27503
antiUTP11	-1.35931	3.76229e-06	antiASF1	-1.23504	0.00524301	antiMRPL28	-1.05065	0.00174761	antiSUB1	-1.07878	1.80321e-08	antiNRG1	-1.11692	6.29728e-08	STP4	-1.03275	7.87696e-07	TDH1	4.02854	0.000505202	antiPDX1	-1.52162	1.92478e-07	antiBUD20	-1.18568	1.04776e-05	antiYGL230C	-1.44172	1.87223e-06	antiPOL4	1.05658	7.12486e-08	PEP4	1.23036	4.13424e-10	FCY21	-1.51004	5.13203e-12	antiGPI13	1.53211	0.0326913	QNQ1	2.65065	1.78726e-13	antiRPS1A	-3.22376	2.00661e-05	antiIOC2	1.23401
YAT1	1.37045	3.76229e-06	antiSEC28	-1.14859	0.00526882	antiYJU2	-1.10409	0.00180466	antiFMP26	1.63322	2.0144e-08	YER187W	1.62248	6.807e-08	antiTIM9	-1.1759	9.37328e-07	antiYCL047C	1.97501	0.000530423	antiGLC3	-1.42839	2.0417e-07	antiRTT109	-1.67074	1.05251e-05	PEP4	1.01517	1.87633e-06	antiVNX1	1.46352	7.65839e-08	antiHMF1	-1.43069	4.16687e-10	antiESF2	-1.47224	5.82173e-12	antiAPC11	-1.07281	0.0329147	antiARG5%2C6	2.00606	1.89749e-13	FYV7	1.0374	2.15533e-05	YPR015C	1.93009
antiFLO8	1.57863	4.04934e-06	antiSPC29	-1.01624	0.00529452	antiYSY6	-1.20626	0.0018064	antiAPP1	2.32353	2.16007e-08	antiHMO1	1.5279	7.24341e-08	antiAXL1	1.09002	9.81798e-07	YAT1	1.2463	0.000550607	antiHAP4	-1.15564	2.09591e-07	antiNIF3	-1.6789	1.05251e-05	YLR036C	-1.28568	1.88217e-06	antiEAF1	1.58709	8.379e-08	RGM1	1.40786	4.64775e-10	antiMRPL36	-1.81825	5.91898e-12	antiMRN1	1.03018	0.0329147	antiYHR022C-A	-2.0134	2.04843e-13	antiAFG3	-1.84929	2.22344e-05	antiUTP11	-2.12823
SYF2	1.00606	4.43484e-06	antiRUB1	-1.26749	0.00534882	antiFMP23	-1.16111	0.00199762	YMR122W-A	-1.13803	2.24757e-08	antiNOP15	-1.05393	7.87346e-08	AMS1	1.06808	1.00986e-06	antiLOT6	-1.73669	0.000552263	GIC2	1.00642	2.09741e-07	MRPL4	1.13368	1.08197e-05	antiRIM1	-1.53833	1.9642e-06	antiRTT101	1.06557	8.86205e-08	antiQDR1	-1.40515	5.17689e-10	antiTHI3	-1.38457	7.00281e-12	antiGIT1	2.16653	0.032983	antiMDN1	2.80004	2.05779e-13	antiNUP170	-2.90232	2.2468e-05	antiPRY3	1.63169
antiSIN4	1.61596	4.65756e-06	JNM1	1.12611	0.00589484	antiCPR2	-1.06544	0.0020121	antiRAD6	1.71924	2.51277e-08	antiIDP2	-1.13506	9.23999e-08	antiMDG1	-1.02832	1.03549e-06	antiYMR315W	1.55712	0.000561201	antiYDL173W	-1.24827	2.23813e-07	antiPHO84	-2.11175	1.09396e-05	FZF1	-1.02066	2.02909e-06	antiDAM1	1.46439	9.54827e-08	antiSNT2	1.57967	5.54907e-10	antiQDR1	-1.45324	7.7743e-12	COS12	-1.05132	0.0332237	antiPUT4	2.2642	2.10308e-13	antiSAP185	-1.60395	2.25721e-05	antiJSN1	2.01675
antiAST1	-1.0686	4.65756e-06	antiMED11	-1.24495	0.00589777	antiMRP13	-1.0071	0.00204198	antiMKK1	2.51421	2.75261e-08	antiYMR315W	1.85405	1.19217e-07	antiYGL108C	-1.14599	1.05977e-06	antiTYE7	-1.26681	0.000561249	antiYOL138C	-1.39385	2.35022e-07	IMH1	1.6285	1.09396e-05	antiROD1	1.62424	2.05693e-06	antiIQG1	1.81552	9.63024e-08	IZH1	-1.28294	5.75339e-10	YPL230W	1.92123	9.49218e-12	antiSWI1	1.47675	0.0336733	ZRT2	-1.22815	2.24578e-13	antiCSN9	-1.45846	2.29259e-05	antiWTM2	-1.58897
antiRAX2	1.55558	5.12081e-06	antiYNL122C	-1.18472	0.00594525	antiYHM2	1.13917	0.00205304	antiSKG3	2.75641	3.01845e-08	antiPLB2	1.9967	1.19534e-07	YDR119W-A	1.56656	1.07598e-06	antiSKO1	1.14752	0.000623436	antiRAD4	-1.46544	2.84796e-07	COQ1	-1.16348	1.09531e-05	antiYLR404W	-1.175	2.05741e-06	antiRPS29B	1.36107	1.01735e-07	CHA1	-1.23093	6.27534e-10	antiPTA1	2.21217	9.73585e-12	antiRSC3	1.17538	0.0336733	RPB10	-1.13929	2.36793e-13	antiYPR109W	-1.68388	2.33848e-05	BUD20	-1.0102
antiNIF3	-1.38277	5.15745e-06	YPR145C-A	2.79628	0.00598636	antiTAH1	-1.02997	0.00205304	antiYMR124W	1.33903	3.5383e-08	antiPUT1	2.02413	1.2357e-07	antiYNR018W	-1.1018	1.17213e-06	MEP3	-1.08096	0.000637067	antiASR1	-1.56502	2.8738e-07	antiMKS1	-1.27047	1.14367e-05	antiYNL035C	-1.05511	2.12937e-06	RPA14_YDR157W	-1.05032	1.05567e-07	antiCHS6	1.32438	6.51258e-10	antiTNA1	1.92549	1.05376e-11	MRK1	1.05018	0.0339337	antiPCA1	2.8338	2.37252e-13	antiPEX17	-1.24826	2.39125e-05	antiYMR206W	1.53196
TPO2	1.00498	5.62604e-06	POG1	1.39892	0.00607393	antiRIT1	-1.05334	0.00229663	antiESS1	-1.06629	3.61515e-08	antiKSS1	-1.02499	1.2357e-07	RAD59	1.03289	1.21559e-06	antiYLR036C	3.30048	0.000711926	MFA2	1.5628	2.89661e-07	antiASR1	-1.18545	1.15199e-05	antiTIF1	-1.33035	2.13915e-06	antiMDV1	1.33336	1.22199e-07	PHS1	-1.05308	6.83424e-10	antiODC1	1.80048	1.08105e-11	antiUTP4	1.25009	0.033999	YEL048C	-1.14151	2.53096e-13	antiYOL087C	-2.72455	2.48185e-05	SDS24	1.68328
antiMRPL31	-1.44226	5.71349e-06	antiCDC19	-2.70236	0.00638954	antiTMA17	-1.03972	0.00231983	antiRRM3	-1.11242	3.90754e-08	YJL118W	-1.07196	1.34485e-07	IME1	-1.20207	1.47258e-06	HSP26	1.62915	0.000719875	antiYJR098C	-1.23693	2.89661e-07	GAP1	-1.05122	1.23625e-05	YGL194C-A	-1.18034	2.14389e-06	antiSEC15	1.78314	1.26086e-07	YHL042W	-1.3737	7.81389e-10	antiJLP2	-1.61841	1.08105e-11	SYF2	1.06766	0.036512	antiPOP1	2.58291	3.06352e-13	antiPMR1	-1.1502	2.79391e-05	antiPCK1	2.72262
antiYOR129C	1.50084	5.87688e-06	YKE2	1.0019	0.00656867	antiRRI1	-1.185	0.00248018	GAL2	1.95235	4.60048e-08	YML007C-A	-1.80529	1.45147e-07	GAL2	1.5871	1.4929e-06	antiKTR4	2.12827	0.000740899	GOT1	-1.57133	2.94745e-07	antiYCR051W	-1.53638	1.23625e-05	antiKAR4	-1.21773	2.14469e-06	antiBEM4	1.24998	1.27731e-07	CYB5	-1.08549	8.04412e-10	TFS1	1.29574	1.14651e-11	antiSTO1	1.7753	0.0379634	antiTCB2	1.41693	3.08295e-13	antiNPL3	-3.50366	2.93977e-05	antiYLR294C	-1.38184
antiSNT309	-1.06421	5.99121e-06	SPC29	1.08474	0.00663184	antiALG9	1.81158	0.00248018	antiRTS3	2.25062	5.25548e-08	YGL081W	1.8199	1.52815e-07	antiATM1	-1.2388	1.57423e-06	DDR2	1.36602	0.000749948	antiYML003W	-1.27701	3.03629e-07	PHO81	1.53537	1.23625e-05	antiGPG1	-1.21708	2.24628e-06	antiYGR266W	1.11104	1.29263e-07	antiECM5	2.06229	8.83439e-10	BAT1	-1.11541	1.25144e-11	antiYSP2	1.03353	0.0386473	ZWF1	1.1485	3.67416e-13	antiCHS5	-1.22605	2.99043e-05	YJR039W	1.29224
antiSUL2	-1.20027	6.2968e-06	antiWHI5	-1.5275	0.00675944	antiESS1	-1.06561	0.00261744	antiLSM12	-1.13725	5.63231e-08	AMS1	1.26006	1.56756e-07	FYV7	1.02735	1.66346e-06	NQM1	1.50475	0.000783177	antiDIG2	-1.51983	3.08037e-07	antiCAD1	-1.34777	1.27619e-05	YNL208W	1.55569	2.51478e-06	antiFOB1	1.14509	1.29263e-07	MSI1	-1.01569	9.4221e-10	antiPXR1	-2.16073	1.35008e-11	POL4	1.20482	0.0388091	RRP7	-1.2301	4.38169e-13	antiCDC60	-3.37741	3.09848e-05	YLR042C	-1.20167
FMP23	1.3623	6.64589e-06	YJL144W	2.02736	0.00702417	antiBRR1	-1.00641	0.00269891	antiSPO22	-1.19589	5.6614e-08	antiYOR262W	-1.07946	1.80234e-07	YML007C-A	-1.48261	1.66346e-06	CIT2	3.32552	0.000802332	antiFMP36	-1.78815	3.31572e-07	antiSSD1	1.47983	1.29165e-05	antiHMF1	-1.20717	2.87275e-06	antiSIN4	1.76425	1.29485e-07	antiYDL133W	2.24039	1.0469e-09	antiFMP36	-1.85849	1.37209e-11	antiRFT1	1.07472	0.0390927	EGD1	-1.07287	6.00624e-13	FIS1	1.00466	3.12351e-05	LSC2	1.63362
HXT8	-1.29895	6.90881e-06	SIT1	1.45631	0.00721134	antiYGR021W	-1.11412	0.00281384	antiALP1	3.2138	6.87967e-08	antiPRR2	-1.02581	1.86243e-07	antiHMO1	1.25021	1.77291e-06	antiGAT1	1.06529	0.00081732	antiOTU1	-1.33388	3.50328e-07	antiNPY1	-1.19889	1.32608e-05	antiINO2	1.49763	3.32777e-06	antiNGR1	2.04966	1.31121e-07	YCR090C	-1.30344	1.30581e-09	antiBUD31	-1.59896	1.39787e-11	antiSNT1	1.50264	0.0393468	antiTAT1	1.07713	6.03282e-13	antiRPL8B	-2.82955	3.35101e-05	antiYLR050C	-1.58569
antiDIA4	-1.02481	6.92746e-06	antiCBF2	-1.2672	0.00721134	antiRBL2	-1.12903	0.00288098	antiDEP1	1.86831	7.04418e-08	YDR034W-B	3.27977	1.99948e-07	antiMSS11	2.19894	1.87076e-06	FRE7	1.21489	0.000825679	YCL058W-A	1.45188	4.63528e-07	antiOAR1	-1.10887	1.32608e-05	antiNSL1	-1.02327	3.37806e-06	antiPRR2	-1.07023	1.34199e-07	antiMAG2	2.09991	1.30581e-09	antiCDC13	1.5538	1.79072e-11	antiSAT4	1.34092	0.0406212	RPC40	-1.07198	7.076e-13	antiZRG17	-1.81012	3.41391e-05	YLR040C	-2.66725
antiFAP1	-1.31649	7.08219e-06	antiNUM1	-1.17935	0.00748247	antiERP5	-1.03345	0.002912	antiTFB3	-1.04375	7.04418e-08	YIL020C-A_HIS6	1.07727	2.98225e-07	antiLYS21	-1.49293	2.18943e-06	antiNUD1	1.81632	0.000864129	antiYBR197C	-1.43599	4.65405e-07	PRB1	1.06613	1.43275e-05	antiYPL041C	-1.17332	3.54076e-06	antiARE1	1.5521	1.48387e-07	antiWRS1	-1.24119	1.39209e-09	antiRGS2	-1.42735	1.79072e-11	antiPOP1	1.14947	0.0417528	antiYPL077C	-1.75078	8.74021e-13	antiSET2	-1.98323	3.48567e-05	antiJID1	-1.82639
antiYIR014W	-1.10117	7.59392e-06	antiLSB3	1.83686	0.00748931	antiAVO2	-1.16406	0.00304094	antiPRR2	-1.05761	7.13507e-08	antiCRR1	-1.20706	3.16429e-07	antiRAD6	1.3592	2.50591e-06	HOR2	1.34529	0.000868923	antiADY2	1.42267	4.68654e-07	antiYNL010W	-1.48926	1.54255e-05	antiMUS81	1.60635	3.54076e-06	antiRPP2A	1.41481	1.50701e-07	LYS1	1.51029	1.45507e-09	GOT1	-1.22283	1.9346e-11	antiLTV1	1.22028	0.0420334	EAF1	-1.692	1.31563e-12	antiRAD14	-1.15506	3.63053e-05	ERG3	1.29469
antiRBD2	-1.08118	7.87167e-06	COS111	1.28645	0.00748931	antiUBC11	-1.17121	0.0030458	SSA4	1.08751	7.15568e-08	antiJNM1	-1.28613	3.27275e-07	antiTHI2	1.39017	2.5776e-06	antiYRR1	-1.00527	0.000894416	antiLRO1	-1.32087	4.81884e-07	ADE13	1.11359	1.58975e-05	FET3	1.2977	3.54076e-06	antiOAR1	-1.09829	1.58339e-07	YHR159W	1.19189	1.48752e-09	antiDUR1%2C2	1.39434	1.99088e-11	antiCFT2	1.30826	0.0421416	antiSMX3	-1.57859	1.37589e-12	antiSWI5	-2.26671	3.65719e-05	antiKIC1	-1.35031
antiIDP3	-1.04394	1.12201e-05	RLF2	1.14878	0.00772284	antiPET20	1.65544	0.00309493	antiSSY1	2.69605	7.50589e-08	antiMRH4	1.57658	3.34086e-07	antiALD3	-1.01661	2.69068e-06	antiREX3	2.1352	0.000925804	BUR6	1.38892	5.13043e-07	TAF5	1.17886	1.602e-05	antiYGR016W	-1.01507	3.88808e-06	antiPPZ1	2.2704	1.6207e-07	antiAPE2	-1.17488	1.51299e-09	TPM1	1.05438	2.06744e-11	antiATG22	1.50294	0.0423031	DPH5	-1.00551	1.54602e-12	antiUME6	-1.64913	3.66624e-05	TFS1	1.33773
YLR040C	-1.43667	1.2532e-05	IMP2'	1.08302	0.00779957	antiYHL010C	-1.10162	0.00318232	antiPDR8	-1.32695	8.09507e-08	antiHBT1	-1.35591	3.41718e-07	YGL081W	1.51112	3.5128e-06	YNR073C	1.47861	0.000937366	YGR110W	2.00605	5.1305e-07	antiBRL1	-1.36985	1.62222e-05	antiOYE3	-1.0961	3.9495e-06	HXT8	-1.51999	1.65142e-07	antiSUN4	1.71721	1.59272e-09	antiUBC13	-1.3559	2.07708e-11	antiRAD9	1.08183	0.0445389	RPA14_YDR157W	-1.53566	1.64756e-12	antiGIS4	-1.82876	3.73287e-05	HMS1	2.16506
antiPCA1	1.95886	1.26223e-05	antiYLF2	-1.30045	0.00799079	antiKAP123	1.13255	0.00332061	antiTIM9	-1.32037	8.18376e-08	antiGAS3	1.48308	3.45464e-07	SSP2	2.29052	3.60089e-06	antiBUD14	1.84521	0.000954163	antiPRM2	-1.11727	5.66695e-07	PRP6	1.06847	1.8514e-05	YDL241W	-1.35672	3.9689e-06	antiUBP14	1.33501	1.70279e-07	antiRDR1	1.60048	1.59844e-09	antiTPK1	-1.26281	2.25799e-11	antiFIG2	1.42853	0.0452937	OPT1	-1.12647	1.73718e-12	antiSMC3	-1.52985	3.76502e-05	antiYLR108C	2.13586
antiRSC2	1.39477	1.29635e-05	antiHLR1	-1.19986	0.00813101	antiENO2	-1.42945	0.00364741	antiYKL187C	2.21051	8.74419e-08	antiPDR8	-1.20813	3.86531e-07	antiATG1	1.29788	3.84229e-06	antiTOS8	1.37143	0.000954163	antiFMP24	-1.15287	5.91861e-07	antiMET13	-1.46252	1.87787e-05	antiOAR1	-1.012	4.00657e-06	antiCAF120	1.17858	1.83983e-07	YGL194C-A	-1.33721	1.8206e-09	RPB9	-1.10811	2.37242e-11	antiSYP1	1.10244	0.045385	antiVMA4	-1.81032	1.89368e-12	SBP1	1.0375	3.8385e-05	COS111	1.43028
antiLSC2	-1.06653	1.33526e-05	antiIZH3	-1.15923	0.00814657	antiLOT6	-1.17077	0.00376251	antiABP140	1.62284	9.02728e-08	antiYKL115C	-1.18652	4.16756e-07	ADH2	1.05495	5.00665e-06	THI4	1.35358	0.0010725	ZRG8	1.0325	6.07799e-07	TEF2	1.48231	1.87794e-05	antiRGS2	-1.0118	4.07368e-06	antiRBS1	1.19699	2.04985e-07	antiINO2	1.78424	1.88844e-09	antiSNX41	-1.65806	2.47698e-11	antiEAF3	1.08788	0.0473723	antiWRS1	-1.48898	2.01147e-12	antiSIK1	-1.75354	3.86798e-05	MFA1	-2.64581
ADR1	1.09867	1.46453e-05	antiHIP1	-1.56292	0.00827145	antiPXR1	-1.03161	0.00396679	antiLCB2	1.47096	9.37239e-08	antiLAP4	1.01105	4.33702e-07	antiHBT1	-1.08641	5.045e-06	antiRMD6	3.04112	0.00109884	antiTPM1	-1.30342	7.14162e-07	antiSIP2	-1.55435	1.93873e-05	YBR137W	-1.24782	4.25866e-06	antiSIR1	-1.46657	2.0971e-07	FRE5	2.07071	1.90065e-09	DCS2	1.91539	2.61998e-11	antiGBP2	1.66972	0.0480641	YPL245W	-1.25953	2.48105e-12	antiATR1	-2.44408	3.87109e-05	PRM4	-1.47004
antiNPA3	-1.15036	1.50706e-05	antiYNG1	-1.55754	0.00828565	antiSPC25	-1.0722	0.00416112	ACP1	-1.01415	9.5921e-08	antiDPH2	2.51109	4.43282e-07	antiKAP122	1.63611	5.10097e-06	antiDMC1	1.1969	0.00111061	antiECM32	-1.30133	7.2746e-07	antiBUD23	-1.67491	2.05891e-05	antiSTL1	-1.2685	5.06595e-06	antiEST1	1.49563	2.0971e-07	antiYDR352W	1.05281	2.01869e-09	antiUTP11	-2.38752	2.9082e-11	YJL144W	1.09225	0.0485304	YGL039W	-1.2511	2.79618e-12	antiVAS1	-1.58704	3.92496e-05	RFC5	-1.03369
antiRRP1	-1.1631	1.50706e-05	PGU1	1.66212	0.00839942	antiRPL13B	-1.62131	0.00418826	DIT1	1.81003	1.1135e-07	antiYOL038C-A	-1.14521	4.43282e-07	antiZEO1	-2.91536	5.45554e-06	antiYFL054C	1.0812	0.00116917	GSY1	1.72012	7.32022e-07	HPF1	1.82698	2.05891e-05	antiUAF30	-1.15617	5.08265e-06	antiRTN2	1.5836	2.40498e-07	ECM3	-1.02595	2.1068e-09	antiJID1	-1.89124	3.51418e-11	antiMNN10	1.05188	0.0485304	YLR003C	-1.16214	2.89758e-12	antiTRS31	-2.0542	4.0619e-05	antiGIM5	-1.51764
ARR2	-1.20822	1.77701e-05	antiCLB6	-1.22628	0.00839942	antiSWI3	1.22695	0.00432078	antiDUR1%2C2	1.10367	1.18086e-07	antiATG1	1.5219	4.56574e-07	antiLEO1	-1.02216	5.50142e-06	antiGTS1	1.1432	0.00117668	antiYNL035C	-1.55844	7.36502e-07	antiRPN14	-1.49036	2.06538e-05	antiSUN4	1.23696	5.18029e-06	antiCIT2	1.60995	2.47836e-07	antiAFG2	2.13492	2.1683e-09	YGP1	1.27318	3.54369e-11				RCL1	-1.26553	3.16512e-12	antiISW2	-2.43711	4.12072e-05	KIN82	1.74271
YLR307C-A	1.36614	2.033e-05	GYP5	1.22388	0.00839942	antiRSP5	1.37416	0.0043748	antiRSM25	-1.05027	1.22806e-07	antiHAP5	-1.19542	4.69007e-07	YOL013W-A_tP(UGG)O1	-1.1029	9.34553e-06	YFL052W	1.35426	0.00118964	RIP1	1.18992	7.56992e-07	antiGDE1	-1.41199	2.06538e-05	antiWSC2	1.42388	5.19445e-06	antiNCS6	1.7907	2.50617e-07	antiYBR116C	-1.21725	2.22079e-09	antiKAP95	1.83883	3.80464e-11				ATP18	-1.30495	3.4755e-12	antiNUT1	-1.53419	4.1277e-05	antiTFP1	-1.22248
antiYLR426W	-1.14471	2.08344e-05	antiNSL1	-1.11986	0.00851329	antiYIL057C	-2.43928	0.00443665	antiGAS3	1.49272	1.29205e-07	antiSCH9	1.68088	5.46309e-07	antiATG2	1.3983	9.7919e-06	antiHEM12	-1.2765	0.00120145	antiRHO2	-1.30782	7.84493e-07	antiYDL144C	-1.2044	2.11659e-05	antiRSC30	2.01586	5.21199e-06	antiMET30	1.86738	2.50617e-07	antiESS1	-1.36229	2.24194e-09	antiYLR050C	-1.5299	3.84833e-11				YNR024W	-1.4771	3.61509e-12	antiCYR1	-2.00466	4.1277e-05	antiNUD1	2.18662
antiHAP5	-1.02551	2.11376e-05	antiPOL4	-1.26659	0.00861164	antiURN1	-1.07496	0.0049432	antiFRQ1	3.13457	1.30268e-07	YMR122W-A	-1.03784	5.46309e-07	QCR9	1.47748	9.7919e-06	DIA3_YDL022C-A	1.73286	0.00120145	antiYOR152C	-1.04209	8.68473e-07	antiPUF2	1.1795	2.25205e-05	antiFLC1	-1.03469	5.21199e-06	antiLSB3	2.08665	2.50617e-07	antiGUT2	1.96982	2.32319e-09	antiOTU1	-1.55201	4.42248e-11				antiVMA8	-1.74825	4.04449e-12	antiPGI1	-2.77453	4.14077e-05	YPL206C	1.04766
antiYML030W	-1.30092	2.1146e-05	ESC1	1.00691	0.00876874	antiYBL039W-B	1.69329	0.00495629	antiTHR1	1.67329	1.33285e-07	PXA1	1.21518	6.04334e-07	antiCGR1	-1.01812	1.09926e-05	BAG7	1.77489	0.00120995	antiSGF29	-1.30423	8.70645e-07	NOP16	1.01216	2.33371e-05	EHT1	-1.03119	5.35614e-06	antiRPP1A	1.63975	3.06283e-07	EST3	-1.57672	2.45234e-09	HSP78	1.47906	5.13893e-11				MDH2	-1.77863	5.00262e-12	antiUBA2	-2.19286	4.15689e-05	ECM13	1.86705
antiVPS16	1.02757	2.1693e-05	ATG20	1.07162	0.00896955	antiRPL28	-1.60001	0.00507563	antiYNL134C	-1.18433	1.37185e-07	antiSER33	-1.17288	6.05052e-07	YJL045W	1.36001	1.16247e-05	antiYGR067C	1.32072	0.00124062	antiRNH202	-1.78419	8.81031e-07	PAP2	1.11945	2.42079e-05	antiATG2	1.6876	5.54155e-06	antiRPL20B	1.61368	3.07846e-07	antiYNL024C	-1.45157	2.48796e-09	CCC2	1.15233	6.3672e-11				antiRPL15B	-1.71224	5.2502e-12	antiYME1	-2.66799	4.31938e-05	GUT2	1.74595
antiHOG1	1.03323	2.72815e-05	antiNUT1	-1.08051	0.00907177	MAE1	1.27133	0.00512493	antiBUD31	-1.12891	1.50058e-07	YBR116C_TKL2	1.73991	6.32676e-07	antiARP7	-2.26121	1.16247e-05	antiPDS1	1.14222	0.00129128	antiCAD1	-1.42035	8.94461e-07	antiMRP21	-1.16882	2.826e-05	YPL257W	-1.1609	5.5609e-06	antiMLF3	1.40611	3.1491e-07	antiPBP1	-1.33547	3.05014e-09	antiASF1	-3.01534	6.64188e-11				FCF2	-1.23992	5.27801e-12	ADH1	1.06873	4.31938e-05	antiPRP31	-1.41277
antiOCA6	-1.49651	2.72815e-05	MND2	1.21418	0.00920382	antiNPA3	-1.01903	0.00515879	antiPLB2	1.96253	1.9407e-07	JEN1	1.55527	6.44733e-07	antiCYC2	1.04468	1.35991e-05	MGA1	1.06982	0.00129465	antiYNL010W	-1.36936	1.00472e-06	NOP13	1.0183	2.98797e-05	TRP5	1.45606	5.83175e-06	antiFMP16	-1.40079	3.33684e-07	FRE7	1.59977	3.13396e-09	antiDUS3	1.4533	7.10402e-11				antiSUN4	1.63378	5.3821e-12	antiRRP5	-2.89316	4.31938e-05	antiYDL129W	-1.76155
antiAXL1	1.07244	2.78341e-05	HSP42	1.74206	0.00943355	antiTFC1	-1.02166	0.00533775	antiWHI5	-1.07646	2.2866e-07	antiSGT2	-1.37021	6.79373e-07	antiYEL047C	-1.01675	1.52226e-05	SPO1	1.06692	0.00129465	antiCHD1	-1.36995	1.02469e-06	UGA2	-1.14892	3.00883e-05	antiZIP2	-1.16181	5.98695e-06	antiSET1	1.14712	3.45296e-07	antiCOY1	-1.55452	3.31636e-09	RPB8	-1.14809	7.35508e-11				YKR041W	1.24185	5.87762e-12	antiMPS1	-1.89297	4.37353e-05	antiUSA1	-1.14798
YKR075C	-1.12822	3.08237e-05	antiRPS28A	-1.44451	0.00948831	ARO10	1.15411	0.00542683	antiSEC61	2.30974	3.05468e-07	antiYET2	1.73924	7.49391e-07	CGR1	1.01033	1.53818e-05	antiYDR119W	1.37772	0.00138767	antiYGR110W	-1.30387	1.09324e-06	MDH2	-1.01215	3.01184e-05	antiTRX1	-1.48903	6.9249e-06	antiSTE20	1.06263	3.73971e-07	HHF1	-1.20084	3.51253e-09	SSA1	1.50354	7.86551e-11				antiDNF1	2.27218	6.82037e-12	antiSPE2	-1.80514	4.40467e-05	YNL046W	-1.15053
antiLSB3	1.74379	3.40984e-05	antiMOT1	-1.77858	0.00980754	antiMIM1	-1.03463	0.0054347	antiPXR1	-1.5073	3.06368e-07	antiFAP7	-1.08887	7.70883e-07	antiMET4	-1.192	1.7469e-05	antiYMC2	1.18548	0.00147059	PLB2	-1.67955	1.14765e-06	RPS30A	1.24675	3.21742e-05	YJR012C	-1.3383	7.05245e-06	antiGIP3	1.08816	3.95272e-07	antiDAM1	1.53799	3.53843e-09	SOP4	-1.05817	8.66201e-11				SIP4	2.58482	7.39966e-12	antiPMA1	-2.60344	4.41376e-05	antiNOP15	-1.32594
antiPCL9	-1.04314	3.52573e-05	antiSIP5	-1.5654	0.00980754	YER121W	1.00249	0.0054838	antiNRG1	-1.04632	3.12285e-07	LIP2	1.06319	8.47867e-07	antiMKK1	1.98338	1.89666e-05	URH1	1.09727	0.00152922	YDL241W	1.35245	1.27017e-06	antiYEL047C	-1.35471	3.24161e-05	antiALG14	-1.11419	7.55365e-06	antiGAL11	1.71041	4.18991e-07	antiMIR1	1.97059	3.61989e-09	YEL048C	-1.10289	8.69048e-11				TMA46	-1.45974	8.1797e-12	antiTOM1	-2.65782	4.41376e-05	antiRPS19A	-1.90749
antiPRE9	-1.1219	3.59549e-05	antiMET16	-1.07099	0.0101186	antiYAP6	-1.31206	0.0055091	YML007C-A	-1.73548	3.25806e-07	antiTMN2	1.12967	8.53003e-07	antiPUT1	1.59598	2.02087e-05	antiFET3	1.51506	0.00156457	antiCPR2	-1.56876	1.32057e-06	HSP60	1.23074	3.27333e-05	antiYJR011C	-1.11039	7.60182e-06	YAL037W	1.69758	4.22005e-07	antiYGP1	-1.61726	3.68469e-09	VMA9	-1.13513	9.31127e-11				antiNSL1	-1.5047	9.68779e-12	antiYNL144C	-1.34598	4.41699e-05	antiCHD1	-1.79317
antiFRT1	1.124	3.89386e-05	antiYBR285W	-1.16696	0.0101186	antiZEO1	-2.04415	0.00585615	antiCOG8	-1.09897	3.28782e-07	antiLCB2	1.39748	8.56174e-07	antiDIM1	-1.43537	2.10683e-05	antiSTB4	2.08883	0.00158825	antiYPS7	-1.11828	1.32767e-06	antiSCJ1	-1.39444	3.29253e-05	antiMGR1	1.31945	7.86072e-06	antiTCB2	1.03342	4.29182e-07	FZF1	-1.18346	3.84711e-09	antiSLI1	1.71531	1.00647e-10				antiTOM1	2.71856	1.04427e-11	antiHRP1	-1.79698	4.43949e-05	ACH1	1.38561
antiYDR336W	-1.11939	4.1284e-05	antiUTP11	-1.20157	0.0101186	antiNGG1	-1.0253	0.0059357	antiYFR012W	1.85269	3.30586e-07	antiSAG1	1.29243	8.81637e-07	antiMTL1	2.00733	2.30302e-05	YHL044W	1.07115	0.00165517	antiYNR071C	1.68288	1.34766e-06	antiHED1	-1.56563	3.34516e-05	antiARE1	1.44831	7.93244e-06	antiREB1	1.06072	4.39154e-07	SLP1	-1.25046	4.06967e-09	antiSWF1	-1.27815	1.09636e-10				PHM7	1.53524	1.11801e-11	antiCOR1	-2.08739	4.63508e-05	antiYOR084W	1.96524
antiHSP30	-1.12465	4.15584e-05	FRT2	1.16214	0.0101186	antiRPS21B	-1.87391	0.00604988	YJL045W	1.68829	3.95384e-07	antiNHX1	1.52419	8.92762e-07	antiATG16	1.44369	2.33731e-05	antiPLM2	1.36227	0.00169572	ENT5	1.00099	1.40153e-06	antiPRE6	-1.66953	3.34544e-05	antiYOR238W	-1.36918	8.35272e-06	antiNAB2	1.70333	4.84381e-07	YFL054C	1.1939	4.0775e-09	IZH2	-1.10002	1.22775e-10				YTP1	1.99299	1.18106e-11	HPF1	1.32062	5.04371e-05	antiAYR1	-1.30894
antiECM1	-1.13274	4.49928e-05	antiYCR061W	1.49972	0.0101186	antiNHP2	-1.39873	0.00636544	antiYER163C	-1.25979	5.0418e-07	MIP6	1.66616	9.17981e-07	antiMNT2	1.2908	2.34776e-05	antiYPR158W	3.14351	0.00178321	antiAYR1	-1.10895	1.69616e-06	FYV7	1.24708	3.52883e-05	antiASI2	-1.10338	8.35727e-06	antiYGR125W	1.44465	4.96398e-07	antiPRP19	-1.32745	4.63895e-09	antiDYN2	-1.85913	1.24881e-10				YPR015C	2.00943	1.34274e-11	antiPAU17	-1.27149	5.12525e-05	antiYOR052C	-1.45636
antiPIS1	-1.10509	4.79676e-05	antiYET1	-1.0397	0.0101936	antiRPP1B	-1.75619	0.00655066	JEN1	1.5939	5.0972e-07	antiRPS7B	1.73699	9.57305e-07	antiMOG1	-1.09516	2.36059e-05	antiYER078C	-1.29096	0.0017984	antiYNL155W	-1.36492	1.71683e-06	antiYKL133C	-1.64557	3.60065e-05	FSH3	-1.50994	8.42589e-06	antiYLR222C-A	1.36334	5.21039e-07	antiIDP3	-1.44786	4.97521e-09	THG1	-1.09478	1.32851e-10				antiIRA1	2.25573	1.40307e-11	antiAOS1	-1.69449	5.17887e-05	antiYJR054W	2.80364
antiRXT3	-1.18685	4.88035e-05	antiRAD5	-1.00376	0.0101938	antiUTP11	-1.10239	0.00669053	antiVAM6	1.50644	5.15516e-07	antiRFC3	-1.0141	9.95067e-07	antiAPP1	1.77072	2.44266e-05	SPS1	1.4206	0.00187264	HSP42	1.19162	1.78664e-06	antiYJL144W	-1.21824	3.65896e-05	STP4	-1.22429	8.84386e-06	antiSWI4	1.40683	5.216e-07	antiVMA10	-1.28019	5.09516e-09	SPO23	-1.32249	1.36891e-10				MCH5	1.41323	1.4308e-11	antiYPT32	-1.49236	5.18181e-05	APE2	1.00938
antiDED81	1.34874	5.24919e-05	antiDBP10	-1.34981	0.01053	antiDIA1	-1.01089	0.00705913	antiNAB2	1.76579	5.21694e-07	antiTMA17	-1.48706	1.00395e-06	YDR034W-B	2.70967	2.55565e-05	antiYJL206C	-1.33381	0.00190726	LAC1	-1.02612	1.80955e-06	antiADE8	-1.21423	3.65896e-05	antiPOX1	-1.3196	8.88725e-06	antiSFB2	1.08898	5.216e-07	antiVTC1	-1.75696	5.10861e-09	antiLAT1	-1.58315	1.45148e-10				INM1	-1.0431	1.43661e-11	antiVPS17	-1.0688	5.18181e-05	antiSAN1	1.42302
antiSCO1	-1.67453	5.3608e-05	antiSAP30	-1.14103	0.010623	antiYNL208W	-1.00063	0.00720667	antiSNT309	-1.20475	5.99585e-07	antiPNS1	1.18878	1.02941e-06	antiPGU1	1.27435	2.56798e-05	antiSPT2	2.05983	0.0019325	MIP6	1.72685	1.8265e-06	antiYNL134C	-1.13279	4.08122e-05	ARN1	1.12975	8.88725e-06	antiYHM2	1.4719	6.39684e-07	antiESC2	2.44349	6.00962e-09	antiBST1	-1.24198	1.46188e-10				RRP1	-1.0281	1.52337e-11	antiGCD1	-2.00483	5.33074e-05	antiTIF1	-1.71898
antiIKS1	-1.04923	5.38197e-05	antiRPL3	-1.9373	0.0106872	antiDIM1	-1.15464	0.00735574	antiDAL80	2.42321	6.07256e-07	antiAPP1	2.12006	1.13356e-06	antiYCR061W	1.29639	2.68595e-05	antiFSF1	1.45247	0.00197904	NGL3	1.4288	1.99419e-06	antiPHO23	-1.23074	4.20862e-05	THI71	-1.02972	8.9876e-06	antiRPL42A	1.49952	6.73112e-07	antiAPP1	2.48271	6.00962e-09	antiCTT1	-1.34632	1.54123e-10				YKL069W	-1.26134	1.55041e-11	antiADE12	-2.65091	5.43944e-05	antiRPL29	-2.12794
antiDSE1	1.06969	5.39934e-05	antiPMD1	-1.42517	0.0106872	antiRPS15	-1.60658	0.0075555	NQM1	1.73457	6.14814e-07	antiPET130	1.52437	1.19701e-06	YBR116C_TKL2	1.40805	3.07903e-05	antiRPL24A	1.22821	0.001981	antiRIT1	-1.4056	1.99419e-06	HSP26	1.47544	4.48935e-05	YLR040C	-1.76289	9.12922e-06	antiSUN4	1.24438	7.01088e-07	antiMEI4	-1.22444	6.10809e-09	antiTRF5	-1.92628	1.6221e-10				antiYBR184W	2.20443	1.63773e-11	antiYNL155W	-1.29671	5.59187e-05	ARO3	1.0645
antiDAN4	1.16812	5.76064e-05	antiDCP2	-1.03551	0.0106872	antiRPP0	-1.55866	0.00803678	antiDAM1	1.22937	6.34023e-07	antiDUR1%2C2	1.08293	1.24541e-06	antiRPS24B	1.35501	3.14723e-05	antiFEN2	1.76894	0.00200715	antiSHY1	-1.53635	1.99825e-06	SPH1	1.06608	4.64668e-05	antiLSM7	-1.41616	9.47685e-06	antiALT2	1.03874	7.81324e-07	antiYPT32	-1.98136	6.81105e-09	antiNOP15	-1.45079	1.62922e-10				RPP1	-1.1249	1.63877e-11	antiRNA14	-3.07814	5.66337e-05	MCR1	-1.22869
antiCYK3	1.14297	6.46402e-05	antiMRN1	1.90365	0.0111368	YJR129C	1.09428	0.00806993	antiNHX1	1.5256	6.8345e-07	antiATG16	1.76348	1.25944e-06	antiDAL80	1.98042	3.31204e-05	TIR1	-1.21412	0.00206136	CIK1	1.25623	2.05691e-06	antiIDP2	-1.16826	4.70975e-05	YML087C	-1.15056	9.50306e-06	antiGGA2	1.49227	9.0481e-07	antiDPM1	1.63966	7.26447e-09	AGA2	-1.56588	1.67409e-10				NNF1	-1.12951	1.83307e-11	antiNOP1	-1.28509	5.66337e-05	CPR6	-1.02534
antiSFL1	1.01968	6.49985e-05	COX17	1.08223	0.0111368	antiHEM13	1.38439	0.00811572	antiYOL092W	2.72342	7.12845e-07	SSP2	2.312	1.30529e-06	IME4	2.51491	3.34846e-05	antiYNR071C	1.83394	0.00210435	QCR8	1.04942	2.06358e-06	antiSGF29	-1.30823	5.02802e-05	antiHNT2	-1.09285	9.5498e-06	antiTGL4	1.04979	1.20612e-06	antiPCA1	2.45319	8.78937e-09	SYS1	-1.15765	1.69535e-10				KRR1	-1.02836	1.847e-11	antiDLT1	-3.48561	5.76802e-05	antiHNM1	-1.69082
antiVID27	-1.90943	6.49985e-05	IGO1	1.20236	0.0111368	antiRPL10	-1.61002	0.00839614	antiBUR6	-1.40903	7.27844e-07	antiYOR052C	-1.05109	1.45193e-06	antiDBP8	-1.09031	3.45984e-05	GIP1	1.31311	0.00231578	GPA1	1.12765	2.19301e-06	antiSAP30	-1.53379	5.11992e-05	antiCRR1	-1.20556	9.5498e-06	antiRIM21	1.23185	1.2277e-06	antiPCF11	2.10017	8.87955e-09	antiUAF30	-1.57175	1.72909e-10				antiNAR1	1.23749	1.85509e-11	antiPOL4	-1.25046	5.87444e-05	TRP5	1.1747
antiMDL1	1.50782	6.55345e-05	PEX19	1.20862	0.0111583	antiPFK27	1.05191	0.00937531	antiTHI2	1.66544	7.52955e-07	antiWHI5	-1.01751	1.47725e-06	antiAAC3	1.60686	3.48455e-05	ATO3	1.03341	0.00239468	antiYPR114W	1.68193	2.19301e-06	antiTAH1	-1.80442	5.11992e-05	antiTHI73	-1.11077	9.97667e-06	antiSSA1	1.82195	1.2349e-06	AGA2	-1.30096	1.08616e-08	antiPOL31	-1.6878	2.36992e-10				RPS21A	-1.26876	1.96104e-11	antiEHD3	-1.28915	6.15543e-05	antiMRL1	-1.38892
antiERV29	-1.20507	6.8887e-05	antiNUP188	-1.32112	0.0114126	antiYLR280C	-1.06173	0.0098253	antiHAP5	-1.15919	8.25237e-07	antiBUD31	-1.04517	1.53497e-06	FIT3	-1.12438	4.05495e-05	antiPAM1	-1.0564	0.00265866	antiHRD1	-1.183	2.19301e-06	VTC1	1.23866	5.15287e-05	YHR022C-A	-1.1624	1.11205e-05	antiSPC98	2.02085	1.44941e-06	antiGTB1	-1.01258	1.15188e-08	antiVMA4	-1.59266	2.406e-10				antiYPP1	2.27677	1.96351e-11	antiRPS6A	-2.26126	6.21561e-05	antiZDS1	1.5555
antiGCD2	-1.69857	7.07118e-05	antiFMP16	-1.03459	0.0114126	antiBRF1	-1.07495	0.0115355	YNL300W	-1.12848	9.19371e-07	antiGPI8	1.60734	1.57503e-06	antiYGR067C	1.73435	4.24933e-05	antiGIP1	2.19145	0.00280692	STR2	1.00336	2.29967e-06	antiNNF1	-1.63555	5.15287e-05	antiECM5	1.64863	1.21064e-05	antiDUS3	1.06199	1.53393e-06	antiYGL146C	-1.11998	1.1538e-08	antiGIM5	-1.65259	2.49336e-10				YMR310C	-1.27862	1.96363e-11	antiRPS19B	-2.04083	6.64613e-05	antiSGV1	1.55028
STE3	1.52373	7.39085e-05	DIA1	1.17894	0.0114128	antiSEC65	1.2307	0.0124669	BIO3	1.12967	9.56041e-07	antiFMP26	1.44821	1.66242e-06	antiROD1	1.18908	5.07545e-05	antiYKL171W	-1.03139	0.00290248	antiRRP14	-1.04517	2.45415e-06	YLR456W	1.09379	5.31641e-05	antiUSO1	1.64565	1.23843e-05	antiCCC2	1.27392	1.55719e-06	YLR225C	1.03933	1.15744e-08	DEF1	1.09601	2.77091e-10				antiTPK1	-1.13937	1.97918e-11	antiDBP9	-1.45338	6.75684e-05	antiYPL077C	-1.67768
antiFOX2	-1.26094	8.22343e-05	antiYNL144C	-1.29482	0.0114535	antiAQR1	1.33162	0.0136596	antiFRS1	2.07466	1.07878e-06	antiYIL141W	1.1444	1.74861e-06	NQM1	1.42524	5.15013e-05	antiRIA1	-1.07771	0.00293632	antiSCJ1	-1.20855	3.80222e-06	antiTPM1	-1.47996	5.36341e-05	YHR035W	-1.15414	1.33516e-05	antiDPM1	1.33637	1.6277e-06	antiMUB1	2.36779	1.16229e-08	ARE2	1.10119	3.03623e-10				antiLGE1	1.69798	2.11582e-11	antiZEO1	-3.03836	6.75684e-05	antiSCJ1	-1.78012
antiGPI14	-1.03285	8.34169e-05	AMS1	1.885	0.0116859	antiRPL6A	-1.07362	0.0140346	antiPCA1	2.38613	1.1231e-06	antiTRM112	1.27176	1.77271e-06	antiGAD1	1.66657	5.15013e-05	antiYKL068W-A	1.37483	0.00294193	PYK2	1.42817	3.83145e-06	antiYNR036C	-1.48244	5.36341e-05	antiBSP1	1.42396	1.39302e-05	antiRPS24A	1.62777	1.67333e-06	antiAYR1	-1.19643	1.18115e-08	antiTFP1	-1.15376	3.18016e-10				antiSRM1	1.49637	2.19264e-11	antiRPL21B	-2.56648	6.97172e-05	antiCBK1	-1.42635
antiMIP6	1.47551	9.23577e-05	OTU2	1.09414	0.0117104	antiRSM19	-1.10809	0.0140966	antiRPL15B	-1.00236	1.33181e-06	antiSCS2	1.75575	2.08162e-06	antiALF1	-1.07382	5.26351e-05	INM1	1.15422	0.00296218	antiERP5	-1.50067	3.86634e-06	antiALG13	-1.06698	5.43408e-05	antiNRG1	-1.12353	1.42297e-05	antiARB1	1.16502	1.78469e-06	YME2	1.12745	1.22272e-08	antiSWC5	-1.96771	3.46318e-10				antiCDC39	2.16106	2.19264e-11	antiCCL1	-2.45928	6.98161e-05	ARE1	1.41793
YKL071W	1.36202	9.23577e-05	antiOCA2	-1.07213	0.01189	antiRGA1	1.04037	0.0164066	antiSCS2	1.76003	1.34771e-06	antiYOR228C	1.50235	2.20563e-06	antiYDR131C	1.2264	5.45366e-05	antiMVD1	1.09998	0.00299115	PCL5	1.60358	3.92737e-06	ZEO1	1.05941	5.56425e-05	antiPCA1	2.2111	1.43003e-05	antiMNL1	1.15253	1.80408e-06	PAN5	-1.0126	1.27337e-08	SNO1	2.76846	3.47118e-10				YDR183C-A_ATC1	-1.10547	2.21564e-11	antiTIF4631	-2.75183	7.20871e-05	HEM14	1.45613
antiVPS3	1.3631	9.39833e-05	antiYEF3	-1.95436	0.012435	antiFUN12	-1.43774	0.0164248	antiJLP2	-1.03663	1.45708e-06	STP4	-1.04824	2.33404e-06	antiARX1	-1.18601	6.18212e-05	YKR015C	1.69001	0.00299557	GRE2	-1.36251	4.10759e-06	antiPUS2	-1.27074	5.71697e-05	antiYHR182W	1.07789	1.44073e-05	antiMNT2	1.52441	1.9446e-06	PET100	-1.20979	1.36401e-08	antiHSE1	-1.37425	3.83105e-10				antiFMP12	-2.04778	2.2327e-11	antiFYV6	-1.99128	7.22658e-05	GOR1	1.52465
antiPRE6	-1.23641	9.47259e-05	EAF7	1.20219	0.0126386	antiILV5	-1.04452	0.0165279	STP4	-1.05203	1.4738e-06	antiSTE20	1.01241	2.50766e-06	antiPET130	1.19877	6.19816e-05	PDR8	1.194	0.00301041	YLR164W	-1.2717	4.43474e-06	antiYDL183C	-1.70571	5.95293e-05	BNA6	-1.10912	1.48549e-05	antiNUP1	1.33088	1.9446e-06	SPC1	-1.1665	1.4271e-08	antiIPK1	-1.70202	3.95459e-10				antiMMP1	2.6493	2.25918e-11	antiRIM1	-1.05623	7.44891e-05	antiNVJ1	-3.11185
antiPNG1	-1.46916	9.47259e-05	RTS3	1.93589	0.0126836	SHC1	1.02623	0.0173013	antiTRM112	1.2259	1.56887e-06	antiYDR306C	1.65987	2.57554e-06	antiNAB2	1.29405	6.25059e-05	antiTIR1	1.80035	0.00304659	antiSNF2	2.50027	4.57623e-06	antiERP5	-1.44689	6.01327e-05	antiYNL010W	-1.39956	1.54058e-05	antiYLR099W-A	-1.31735	2.01868e-06	antiBUB3	-1.30646	1.42757e-08	antiSPC24	-1.28424	4.74436e-10				NOB1	-1.08094	2.28931e-11	antiSSB1	-3.41883	7.62667e-05	antiPHO85	-1.13458
antiYOL038C-A	-1.86692	0.000104699	antiARE1	1.39659	0.0128595	antiTOS1	1.11923	0.0174497	antiDPH2	2.51929	1.66145e-06	antiFMP48	2.30093	2.75453e-06	antiYGL082W	1.34449	7.8765e-05	YLR040C	1.11062	0.00309054	antiMLC1	-1.53064	4.70206e-06	antiATG18	-1.24901	6.04295e-05	antiYHR035W	-1.0046	1.65509e-05	antiWHI2	1.498	2.06174e-06	antiSLI1	1.58193	1.44059e-08	antiMET16	-1.57347	4.81105e-10				antiURA2	1.87428	2.31854e-11	antiYHP1	-1.03513	7.63075e-05	AGA2	-1.31244
antiYHL008C	1.36759	0.000105358	CMK2	1.03162	0.0128995	antiYGR079W	-1.37433	0.0188369	DMC1	2.72073	1.85219e-06	antiFAA1	1.0261	3.07543e-06	DIT1	1.32913	8.09801e-05	antiCAF120	1.24257	0.00309054	antiMAK3	-1.06515	4.71918e-06	YBR255W	1.06669	6.49093e-05	YBR108W	1.02712	1.68663e-05	antiSWP82	1.31614	2.17971e-06	antiSNU66	2.09241	1.44934e-08	CWP1	-1.45783	4.91227e-10				RPL36A	-1.10101	2.33351e-11	antiRPS4A	-1.60547	7.68951e-05	antiSNX41	-1.47216
antiMRP13	-1.24318	0.00011144	YPI1	1.15244	0.0129438	DFR1	1.02545	0.0192041	SPR3	2.03449	1.99423e-06	antiECM10	1.66139	3.08231e-06	antiRTS3	1.55823	8.3998e-05	HSP12	1.82967	0.00309054	GPM2	1.6709	4.71918e-06	antiHMG2	1.00892	6.69816e-05	antiVMA8	-1.09433	1.71135e-05	antiSPT3	1.46138	2.51161e-06	antiCLN1	1.98794	1.44934e-08	COS10	-1.30142	5.01288e-10				antiSYF1	-1.3721	2.61573e-11	antiMRPL7	-1.15503	7.72785e-05	KTI11	-1.23591
antiKCC4	1.13992	0.000113574	antiSNT309	-1.31428	0.0129483	antiRPL24B	-1.21957	0.024727	antiGPG1	-1.02366	2.02927e-06	antiUPS1	1.8515	3.09709e-06	antiYMD8	1.64974	9.20835e-05	YJL038C	1.65024	0.00330474	antiYMR160W	-1.26357	4.71918e-06	antiHAP5	-1.28201	6.76205e-05	antiAUR1	-1.0513	1.72397e-05	antiSKI8	1.50987	2.60366e-06	YOR051C	-1.07702	1.49124e-08	antiTOS2	1.22769	5.0993e-10				YNL010W	-1.09285	2.66059e-11	antiTPA1	-2.65079	7.79336e-05	antiMSB3	-1.67228
QNQ1	1.65858	0.000113574	UGX2	2.5107	0.012972	antiTBF1	1.27307	0.0251493	GSY1	1.25152	2.06806e-06	antiRTS3	1.98323	3.29982e-06	antiTAF9	1.3086	0.000114461	antiRPN5	1.4377	0.00333471	antiYEN1	-1.54511	4.92218e-06	antiHNT2	-1.03168	6.91558e-05	antiZPS1	-1.60718	1.77096e-05	antiVPS54	1.14052	2.63269e-06	RHR2	-1.31792	1.55894e-08	YMR122W-A	-1.45568	5.10661e-10				antiYPR036W-A	1.91032	2.79786e-11	antiRSC9	-1.61169	7.87317e-05	antiUTP5	-1.33219
SPS19	1.89277	0.000114842	antiMCM16	-1.24607	0.0130355	antiYDL206W	1.03256	0.0274631	YDR034W-B	3.10081	2.14545e-06	GSY1	1.20902	3.39922e-06	antiSCS2	1.38829	0.000122581	antiCTH1	-1.07791	0.00347354	SPO22	1.38159	5.08854e-06	ACO1	1.05266	6.91558e-05	antiPRP19	-1.05748	1.81767e-05	antiSRL1	1.9463	2.64862e-06	BUD27	1.11873	1.61292e-08	antiNUS1	-1.26685	5.14608e-10				YCR099C_YCR100C_YCR101C	-1.60788	2.87907e-11	antiSWP82	-1.66474	7.9753e-05	antiVMA8	-1.39003
YFL052W	1.11398	0.000118327	antiMRPL25	-1.24187	0.0130355	antiHPT1	-1.15471	0.0323071	SPS19	2.2365	2.14545e-06	antiTHR1	1.51915	4.06698e-06	HSP12	1.72298	0.000124103	antiMRP13	-1.06968	0.00366289	antiYRR1	-1.2872	5.15104e-06	antiVPS66	-1.11119	7.27737e-05	SEN15	-1.06268	1.9142e-05	antiLEU4	1.04988	2.72247e-06	PIB2	1.27313	1.63367e-08	antiYNL247W	-1.65144	5.40432e-10				HSP150	1.28014	3.26068e-11	antiSUT1	-1.51201	8.13463e-05	antiYER079W	-1.84126
antiLSM7	-1.02374	0.000120061	antiYMR244C-A	-1.35367	0.0130355	antiSTT4	-1.03014	0.035125	antiRNH203	-1.24087	2.26066e-06	CIT3	1.35367	4.23699e-06	antiRPS7B	1.34019	0.000131033	antiSRM1	1.08924	0.00393274	antiPEF1	-1.99215	5.15104e-06	antiYDL025C	-1.4702	7.42029e-05	antiEDE1	-1.26526	1.96149e-05	antiYCK3	1.45843	2.72247e-06	GDH3	-1.21591	1.73777e-08	antiAYR1	-1.35812	5.62532e-10				ALK1	-1.08027	3.35189e-11	antiSTT3	-1.3295	8.18957e-05	antiCWH41	-1.59355
antiKRR1	-1.13589	0.000133007	antiSPR3	-1.31172	0.0130505	antiRPL14A	-1.38388	0.0370867	antiYJL144W	-1.09026	2.27204e-06	antiILV1	1.7946	4.72147e-06	SPR3	1.62145	0.000139324	antiYDR367W	1.64756	0.00405052	antiMRPS8	-1.36739	5.18227e-06	antiCPR2	-1.56719	7.57163e-05	BNA5	-1.07687	2.06225e-05	antiYJL123C	1.35055	2.72247e-06	ARR2	-1.88553	1.78886e-08	FLC2	1.0185	6.10624e-10				antiSAM3	-1.19603	3.68372e-11	antiCBP1	-1.66669	8.22446e-05	YLR194C	-1.12411
antiFAR11	1.36931	0.000134715	antiATG22	1.88072	0.0130505	antiGLC8	-1.04083	0.0387165	SHC1	1.7262	2.30916e-06	antiPPN1	1.06916	4.91171e-06	antiAHA1	-1.04362	0.000144722	GPM2	2.63477	0.00417911	antiMKS1	-1.39477	5.37958e-06	AGA2	-1.10496	7.71779e-05	YJR011C	-1.39723	2.19474e-05	antiHRD1	1.10294	2.7261e-06	antiOAR1	-1.18761	1.82368e-08	BAG7	2.44735	6.45492e-10				GIS2	-1.01831	4.27121e-11	antiMEX67	-1.3265	8.32577e-05	antiFMP29	-1.79378
antiKCS1	1.05123	0.000147516	antiBUD27	-1.11306	0.0131165	antiSNQ2	1.04776	0.0391551	antiTAF9	1.65241	2.39196e-06	antiDAL80	2.29355	4.91171e-06	SPO22	1.06923	0.000144722	antiMDH3	1.29953	0.00442411	antiYML030W	-1.44522	5.37958e-06	antiYJR011C	-1.00456	7.90143e-05	YLR118C	-1.02206	2.20157e-05	antiYPR1	1.17413	2.7261e-06	FMP14	-1.35058	1.86074e-08	TIM18	-1.13819	6.46135e-10				antiVPS1	1.94478	4.43086e-11	antiLRE1	-1.8643	8.8686e-05	YKL187C	1.42144
antiABP140	1.18789	0.000147942	HEM4	-1.18816	0.0131191	antiCRM1	1.12096	0.0431723	antiYER187W	1.98063	2.58646e-06	antiYJL144W	-1.07824	4.9625e-06	antiAPJ1	-1.03393	0.000156386	antiALP1	2.17177	0.00486299	antiYIL083C	-1.3462	5.37958e-06	antiDAL3	-1.46609	7.91027e-05	antiSRM1	1.14915	2.56276e-05	antiBSP1	1.37397	2.73384e-06	YIR014W	1.15131	2.00275e-08	antiTOP3	1.53119	8.21764e-10				LTV1	-1.01825	4.43453e-11	antiSHM1	-1.07582	8.95659e-05	antiNMT1	-1.53844
YHR177W	1.38078	0.000148627	GTO3	1.46544	0.0131688	antiRPL3	-1.15362	0.0437456	MIP6	1.60672	2.58646e-06	HSP12	2.12861	5.14221e-06	antiALP1	2.43977	0.00016004	YHR022C	-1.21695	0.00492954	antiYDR051C	-1.11496	6.15595e-06	antiTMA22	-1.37157	7.96359e-05	antiARO80	1.17168	2.65757e-05	antiPIL1	1.78614	2.78263e-06	KAR5	-1.06609	2.10767e-08	TVP18	-1.05035	8.21764e-10				antiYKR041W	1.58614	4.67135e-11	antiCLC1	-1.68177	9.06919e-05	EMI2	1.61766
antiMSN1	-1.11149	0.000149694	antiYIR014W	-1.13797	0.0134573	antiMGM1	1.00909	0.049237	antiASE1	2.07051	2.61216e-06	SPR3	1.99996	5.22704e-06	antiVPS30	1.52462	0.000181348	antiMTR10	1.49281	0.00507432	antiCOQ4	-1.52004	6.15595e-06	antiYNL247W	-1.15043	8.10914e-05	ARG3	1.39678	2.7943e-05	antiRMD9	1.51413	2.81818e-06	antiLSM7	-1.59127	2.20001e-08	YSY6	-1.15817	8.61997e-10				antiUTP4	2.52589	5.20657e-11	antiPAT1	-3.56696	9.27303e-05	COX5B	1.8677
antiCOG3	1.47685	0.000150603	GGA1	1.10659	0.0135186				antiCCW14	2.03666	2.79176e-06	GAL7_GAL10	1.30067	5.22704e-06	antiACH1	2.32999	0.000188341	antiYOL159C-A	1.47004	0.00515262	antiCDC23	-1.31058	6.15595e-06	antiPOR2	-1.22431	8.13984e-05	antiMED11	-1.40797	2.83548e-05	antiTAF5	1.0196	2.92366e-06	QDR3	1.07455	2.2191e-08	RPC11	-1.08048	9.48697e-10				antiCSF1	1.83523	5.83007e-11	antiBUL2	-1.86574	9.27843e-05	LYS1	1.12556
antiSAG1	1.03804	0.000156471	CHZ1	1.19152	0.0138724				antiMTL1	2.36199	2.8326e-06	antiFET3	1.08343	5.4864e-06	antiADH1	-1.56238	0.000196016	antiMRPL10	1.79005	0.00532354	antiCPS1	-1.26161	6.27696e-06	antiYKL115C	-1.12519	8.18414e-05	antiERV46	1.78589	2.84788e-05	antiGIS4	1.32322	2.95416e-06	AGP1	1.08326	2.41494e-08	antiLSC2	-1.87291	9.5193e-10				RPC10	-1.00954	6.2291e-11	antiBNI1	-3.15557	9.29439e-05	antiYNL040W	-1.64177
antiTRK1	1.17197	0.000170595	antiWSC2	1.43851	0.014229				antiENT3	1.76277	2.90686e-06	antiECM37	1.45926	6.20222e-06	antiFLO5	5.0149	0.000200422	YJL217W	1.01046	0.00558744	antiLOC1	-1.31943	6.27696e-06	RDH54	1.07225	8.20074e-05	HTA1	-1.14624	3.50007e-05	antiHAL1	1.33035	3.07073e-06	antiPHO8	1.92751	2.54874e-08	antiBUD20	-1.32039	9.75522e-10				BCP1	-1.32556	6.71146e-11	antiFAA4	-1.04622	9.42355e-05	ERG6	1.43629
antiLUC7	-1.023	0.000178426	SNO1	2.32907	0.0142468				IME4	2.8568	2.96372e-06	antiSSY1	2.21447	6.21286e-06	antiTHI4	1.07898	0.000200947	antiDLD3	-1.03324	0.00564939	antiYOR052C	-1.216	6.37519e-06	YKE2	1.14486	8.75853e-05	antiDYN2	-1.20918	3.74607e-05	antiBNI4	1.14224	3.19003e-06	YMR130W	-1.18317	3.07188e-08	PST2	1.20967	9.9321e-10				TSR2	-1.00706	7.05091e-11	antiTRS130	-1.20831	9.45705e-05	antiYNL254C	-1.19662
antiARX1	-1.34837	0.000183618	FYV7	1.21916	0.0143091				antiRNQ1	1.25066	3.00496e-06	antiALP1	2.41088	7.32133e-06	antiLCB2	1.01738	0.000210236	antiVPS20	2.2862	0.00574684	antiMOG1	-1.54235	6.53323e-06	antiYAR1	-1.52381	8.84207e-05	antiKIC1	-1.00431	3.95142e-05	antiGDH1	1.33398	3.27072e-06	FSH1	-1.0998	3.16278e-08	antiFLO10	2.12105	1.06863e-09				FES1	-1.13936	7.204e-11	antiSUB1	-1.13174	9.99664e-05	HPF1	1.81654
antiGCS1	-1.54453	0.000202509	antiTMN2	1.15151	0.0145645				antiRPS7B	1.68287	3.00942e-06	antiYFR012W	1.72532	7.4384e-06	PES4	2.0656	0.000222201	antiRRI2	-1.06554	0.00583476	antiYJR011C	-1.06321	6.57665e-06	ISW1	1.06904	8.84207e-05	antiSPS100	-1.21392	3.96442e-05	antiYGR035C	1.70324	3.3581e-06	antiGPH1	-1.12318	3.16278e-08	antiGPI14	-1.68128	1.07266e-09				LCP5	-1.15301	7.3617e-11	antiCOG1	-1.17952	0.000102147	antiYCF1	1.82722
antiYJR141W	-1.08609	0.000215725	antiUTP20	-1.21336	0.0145892				antiSAG1	1.22081	3.33795e-06	antiMRPL24	1.09226	7.50387e-06	RIM4	1.09513	0.000222431	antiYBR284W	1.60656	0.00583476	YIR042C	1.03853	6.57665e-06	PRM5	1.12136	8.85397e-05	antiSMM1	-1.22969	3.99452e-05	antiECM10	1.08002	3.76282e-06	PGU1	1.9748	3.22901e-08	ECM13	1.62893	1.08984e-09				antiSPC24	-1.26984	7.77728e-11	antiLYS14	-1.78842	0.000102716	FTR1	1.27356
antiREF2	-1.11179	0.000221989	antiPLP1	-1.01779	0.014855				YER187W	1.42844	3.54579e-06	antiAAC3	1.84234	7.51259e-06	antiYCR095W-A	3.2958	0.00024742	antiSAM2	1.53432	0.00605332	antiHIS2	-1.18053	7.0828e-06	antiDUR1%2C2	1.41267	8.88341e-05	ADR1	1.39173	4.63367e-05	antiCOQ6	1.17179	3.89931e-06	antiMUS81	1.98441	3.50437e-08	antiCTF4	-1.56633	1.13843e-09				antiKIP2	1.57246	8.04421e-11	antiVPS13	-3.29739	0.000102829	antiSYF1	-1.08708
antiJSN1	1.38802	0.000223642	GOT1	-1.13868	0.0148813				antiPGA3	1.10755	3.63523e-06	antiYKL187C	1.48537	7.8945e-06	antiYOL092W	2.10997	0.000253136	YPT53	1.923	0.00639991	antiKRR1	-1.32361	7.33577e-06	ZSP1	1.26195	8.91981e-05	PIB2	1.16424	5.02726e-05	PRM5	-1.05403	3.99876e-06	antiYOR238W	-1.46121	3.94837e-08	SET4	1.78992	1.23394e-09				antiALR1	2.07655	8.16729e-11	antiUBP13	-2.08455	0.000106858	BTN2	-1.47978
antiRIM15	1.09977	0.00023076	antiYNL024C-A	-1.55649	0.0150325				antiMSA2	1.11538	3.79476e-06	GIP2	1.4606	7.95696e-06	antiARE1	1.08212	0.000291942	antiSPS1	2.38149	0.00648727	antiCCP1	-1.53146	7.51467e-06	CHS3	1.07232	9.28282e-05	YOL097W-A	-1.10401	5.29032e-05	antiDPL1	1.6633	4.08446e-06	antiYCR015C	1.67635	3.95702e-08	FEN1	-1.03708	1.26983e-09				ADE17	-1.27264	8.32153e-11	antiRPS2	-1.4529	0.000107534	KTR2	-1.08637
antiYER079W	-1.01015	0.000236732	UPF3	1.04815	0.0160756				antiTHI4	1.34916	3.79476e-06	antiYMD8	1.9622	8.28741e-06	antiPDS1	-1.01126	0.000296994	YMR206W	1.35695	0.00725042	antiTSA2	-1.64904	7.82915e-06	antiGLC3	-1.32224	9.31689e-05	antiMAG2	1.52118	5.29964e-05	antiRPL13A	1.61209	4.19088e-06	antiSSY5	-1.12444	4.0563e-08	YKL071W	1.94678	1.2748e-09				RPB8	-1.09622	8.68385e-11	antiHPR1	-1.32701	0.000107534	LAP4	1.17164
SEO1	1.56589	0.000242436	antiPDR5	-1.95986	0.0160973				antiTMN2	1.0658	3.80313e-06	CDA1	2.29765	8.6623e-06	antiTPI1	-1.63373	0.000296994	antiRPL41A	-1.32812	0.00751403	RCN2	1.2697	7.95483e-06	antiCAR2	1.28881	9.76892e-05	antiRNH203	-1.24311	6.22844e-05	antiAVT4	1.18041	4.357e-06	antiARE1	1.70105	4.26065e-08	YHR022C-A	-1.39278	1.3734e-09				YKL068W-A	-1.65037	1.0054e-10	antiSPA2	-1.53583	0.000108931	antiRPI1	-1.85892
antiYGR210C	-1.01084	0.000251748	antiMAK3	-1.36276	0.0164589				antiHBT1	-1.21727	3.81151e-06	antiNDD1	2.0021	9.9248e-06	antiASF1	-1.10339	0.000308912	LEE1	1.54677	0.00792527	POG1	1.44344	8.43562e-06	antiBDH1	-1.03078	0.000100286	IMP2'	1.32298	6.42447e-05	antiRPS10B	1.41932	4.36651e-06	YHB1	-1.32269	4.33836e-08	antiCOG8	-1.41494	1.71131e-09				CDD1	-1.62939	1.0054e-10	antiUBR1	-1.60636	0.000108931	antiHOS4	1.47748
antiMFT1	-1.6697	0.000255085	antiGIM5	-1.11335	0.0166616				antiYMR315W	1.67503	3.83631e-06	antiPRP21	1.04559	1.01553e-05	antiNHX1	1.07235	0.000336465	antiYBR184W	1.1469	0.00851492	antiRSM23	-1.29778	8.6603e-06	antiTOF2	1.34849	0.000102756	antiSPO7	-1.43061	6.46626e-05	antiYHR087W	-1.07718	4.36833e-06	SDS24	1.1391	4.48155e-08	antiMTG2	-1.41102	1.73222e-09				antiCTT1	-1.24689	1.01428e-10	antiUBP16	-1.339	0.000109414	AGA1	-1.13731
antiYNG1	-1.45218	0.000256225	antiFMC1	-1.31345	0.0166625				antiKOG1	2.48332	3.94847e-06	antiTHI4	1.33361	1.01981e-05	CDA1	1.81294	0.000340995	antiSTT4	2.14601	0.00889871	HSP104	1.31621	8.73737e-06	STT4	1.00034	0.000107226	antiYBL029C-A	-1.06893	6.47196e-05	antiCHO1	1.39686	4.66689e-06	antiYDR239C	1.53497	4.6702e-08	antiREV1	1.69352	1.73474e-09				antiLSM1	-1.63014	1.03215e-10	antiSSE1	-2.38906	0.000111338	antiIDP2	-1.32001
ARR3	-1.05233	0.000259265	antiRPS12	-1.73651	0.0166625				antiMEC1	1.27913	4.53794e-06	antiCAK1	1.20408	1.02106e-05	antiPOG1	1.80413	0.000344229	YTP1	1.04467	0.00902244	antiYOR022C	-1.53521	8.75161e-06	antiSNF6	-1.16819	0.000109789	YDR248C	-1.27854	6.52646e-05	antiYSP2	1.47746	4.71019e-06	antiNCA2	1.46428	4.71736e-08	antiMRL1	-1.56706	1.74315e-09				antiVNX1	1.79259	1.08149e-10	antiMRD1	-1.92606	0.000111338	YOL019W	-1.02405
antiBCK2	1.41325	0.000267318	TOS2	-1.13879	0.0166625				antiYML020W	1.40716	4.94452e-06	antiASF1	-1.41672	1.03031e-05	SEO1	1.45084	0.000352968	antiMAC1	1.21035	0.00902244	antiLEU4	1.00773	9.86511e-06	YHR138C	1.04884	0.000110833	antiYHR022C-A	-1.12169	6.80531e-05	antiYDR306C	1.58571	4.81549e-06	FET3	1.05318	5.03219e-08	antiRRP45	1.90228	1.95329e-09				IZH2	-1.06165	1.11541e-10	antiNUM1	-1.55564	0.000112074	antiARP7	-1.99284
antiRSC6	1.03303	0.000271618	antiHNT2	-1.0824	0.0168112				antiDIM1	-1.68455	4.98757e-06	antiLSC2	-1.11698	1.06132e-05	antiYAL046C	-1.04307	0.000360625	MCH2	1.59786	0.00925955	YCL012C	-1.18225	9.94181e-06	YLR164W	-1.06719	0.000114489	REV7	-1.22705	6.82574e-05	antiRPL22A	1.64161	5.01554e-06	antiSWR1	1.70993	5.07979e-08	SUT1	-1.07694	2.29994e-09				antiCCW12	2.06627	1.18848e-10	antiSEC9	-1.96773	0.000113027	NCP1	1.11891
antiMTL1	1.92849	0.000287079	antiYLR126C	-1.02432	0.016903				antiYIL141W	1.12873	5.16419e-06	YER128W	1.07808	1.13468e-05	antiENT3	1.17665	0.0004266	antiYPR114W	1.50556	0.00940228	ZEO1	1.10335	1.00378e-05	antiMLC1	-1.53256	0.000114489	antiARG80	-1.02709	7.20464e-05	antiAIR1	1.15105	5.26928e-06	antiAAD6	2.85308	5.20238e-08	YSC84	1.14151	2.33483e-09				NOP10	-1.1037	1.27672e-10	antiIFM1	-1.43654	0.000115499	antiIRC20	1.16655
antiAPC5	-1.21095	0.000292106	antiCUS1	-1.02763	0.016903				CIT3	1.3114	5.50088e-06	antiYML053C	1.77563	1.16904e-05	antiSKG3	1.81771	0.0004409	antiPDB1	-1.21958	0.00959416	antiDPB4	-1.85511	1.04858e-05	ENP1	1.25823	0.000116322	antiARP7	-1.59031	7.20464e-05	antiMDM32	1.43317	5.26928e-06	TAZ1	-1.19149	5.26603e-08	antiRSM25	-1.32686	2.57793e-09				antiSHE9	-1.12643	1.30281e-10	antiSSF2	-1.43555	0.000115499	antiYER078C	-1.42607
antiMGE1	-1.32413	0.000297077	DID2	1.21189	0.0169778				ERI1	-1.1924	5.74349e-06	antiYKL105C	1.06729	1.18243e-05	antiRBL2	-1.09459	0.000451328	antiPEX2	1.01635	0.00974764	SAM3	1.38759	1.17158e-05	NOP8	1.15536	0.000117636	antiRBL2	-1.75826	7.28031e-05	antiSMC3	1.19568	5.42504e-06	antiNSL1	-1.07234	5.37515e-08	antiUTP10	2.46379	2.59491e-09				ZRG8	1.22334	1.32083e-10	antiYPT11	-1.52915	0.000116199	RPA12	-1.07775
antiYNR036C	-1.12155	0.000297077	UBI4	1.60941	0.0169778				antiECM10	1.62923	5.86797e-06	antiURH1	1.54471	1.30992e-05	antiNDD1	1.59641	0.000497396	RTS3	1.00844	0.00990528	ERG28	-1.24868	1.23025e-05	antiPEP12	-1.10714	0.000119752	antiUSE1	2.30081	7.28031e-05	antiRPS2	1.33931	5.84755e-06	antiPTR3	1.50127	5.74544e-08	UPC2	1.03598	2.62475e-09				antiDBP2	1.97691	1.33159e-10	antiRPS21B	-2.72992	0.000117863	antiESS1	-1.20372
antiYDR131C	1.19017	0.000302345	antiTUB3	1.7984	0.0169998				antiMNT2	1.50769	6.00431e-06	antiYJL123C	1.47736	1.38279e-05	antiACA1	1.20289	0.00051135	GLC3	1.01397	0.00991132	FUN26	1.22434	1.3035e-05	ARG1	-1.05152	0.000119964	antiSNT2	1.21716	7.5868e-05	antiAFG2	1.68123	5.9105e-06	HXT1	-3.46086	5.97957e-08	LSC2	1.50562	2.62475e-09				RPO26	-1.04327	1.34749e-10	antiNCB2	-1.35157	0.000118013	SVS1	-1.3931
antiZDS1	1.04885	0.000303	antiPET117	-1.18835	0.0171631				antiECM37	1.44871	6.2343e-06	antiMUD2	1.47772	1.47884e-05	antiHHF1	-1.29233	0.00051209	antiIOC2	1.09416	0.0103999	antiRPS26B	-1.17452	1.4105e-05	antiDYN2	-1.22531	0.000127384	antiTRR1	1.04193	8.33421e-05	antiBDF1	1.55658	6.08141e-06	antiNRG1	-1.21702	6.01228e-08	antiVAC7	-1.40714	2.69278e-09				antiHMT1	2.1472	1.40931e-10	antiSRP68	-2.80008	0.000118013	antiCCC2	1.74078
antiRTT107	1.48619	0.000307818	PRP4	1.01091	0.0171631				YNR064C	2.08741	6.64726e-06	antiRPA12	1.29667	1.62505e-05	antiMSY1	-1.11874	0.000562599	antiARG5%2C6	1.1229	0.0105688	antiCHS6	-1.21926	1.44779e-05	antiAPC4	-1.01418	0.000138643	YLR456W	-1.21465	8.40668e-05	antiATG2	1.49199	6.10781e-06	antiYJR011C	-1.2036	6.01228e-08	antiYGL196W	-1.45688	3.06453e-09				antiLAT1	-1.50141	1.47136e-10	antiPAM16	-2.83375	0.000120054	antiHTA1	-1.15712
antiUBX3	-1.0833	0.000307818	antiSRP54	-1.00709	0.0172				antiFLO5	6.10582	6.86503e-06	antiSNF3	2.37113	1.62505e-05	YPR145C-A	1.93421	0.000563367	antiRPS17A	-1.15384	0.0112057	antiPEA2	-1.03844	1.44779e-05	antiMSC2	-1.22368	0.000141428	antiIPK1	-1.05111	8.58597e-05	antiATG22	1.66939	6.18085e-06	antiFLC1	-1.07703	6.23204e-08	antiYDR063W	-1.61412	3.11104e-09				GNA1	-1.22023	1.47136e-10	antiNOT3	-4.17672	0.000120054	antiSMF2	-1.48579
antiRBL2	-1.26635	0.000318651	antiSTI1	-1.497	0.0174379				antiFUN26	2.05153	6.93916e-06	antiPOG1	2.19681	1.67158e-05	antiMBA1	1.53208	0.000565041	antiCDC46	1.49671	0.0112174	antiYGR021W	-1.70881	1.51457e-05	antiYER156C	-1.1392	0.000141428	AQR1	1.16566	8.74424e-05	antiMRP20	1.23294	6.19611e-06	antiHMO1	1.70229	7.17211e-08	antiHIS7	-1.51654	3.30509e-09				NEJ1	-1.33669	1.57348e-10	antiGPD2	-1.15551	0.000120525	antiPOL31	-1.43945
antiRRP17	-1.276	0.000324297	antiPSY4	-1.12213	0.01759				antiYOL038C-A	-1.0076	6.99112e-06	antiACA1	1.55044	1.70269e-05	antiTFB4	1.04377	0.000576421	MRK1	1.05683	0.0119323	antiCSR2	-1.07945	1.51457e-05	antiYPS7	-1.10671	0.00015202	antiYMC2	1.2542	8.90882e-05	antiCFT2	2.05697	6.21379e-06	antiHAA1	1.53138	7.46946e-08	antiHEM15	-2.17232	3.49375e-09				YHI9	1.25896	1.68467e-10	antiCUP9	-2.05344	0.000121388	antiADE13	-2.25122
antiISW1	-1.13722	0.000351603	antiRPH1	-1.04392	0.0176331				antiYGL108C	-1.15933	8.44667e-06	antiSKI8	1.4194	1.72415e-05	antiYLR218C	-1.00429	0.000684671	antiRIB3	-1.09523	0.0121004	antiYOR097C	-1.13418	1.51502e-05	antiYLR099W-A	-1.18922	0.000152471	antiYGP1	-1.19615	8.93198e-05	antiUME6	1.20431	6.23364e-06	ARG80	-1.20372	7.64515e-08	antiHTD2	-1.04751	3.9731e-09				antiGCN4	2.19462	1.70547e-10	antiSOG2	-2.08218	0.000121388	DCS1	1.1409
antiHSP42	1.27837	0.000363141	TMA10	2.87969	0.017783				antiSCH9	1.52974	9.07008e-06	OSW2	2.12442	1.73361e-05	antiCCW14	1.49116	0.000704773	antiYFR026C	1.4404	0.0121629	antiSSS1	1.34263	1.52665e-05	antiMEC3	-1.01329	0.00015573	antiHIM1	-1.0618	8.95008e-05	antiNUT2	-1.06212	6.4775e-06	TMA7	-1.01155	8.19418e-08	antiYHL018W	-1.55142	4.40267e-09				YOR152C	1.03138	1.82597e-10	antiSKI3	-1.6617	0.000122617	YMR181C	1.3597
antiYRA2	-1.20869	0.00038072	antiMMS2	-1.54962	0.0177934				antiATG1	1.40794	9.07665e-06	antiOSH2	-1.39805	1.93989e-05	antiYET2	1.19894	0.000718057	antiHPT1	1.43143	0.0123742	NOP15	1.01331	1.56049e-05	antiMIF2	-1.08361	0.000156351	antiALF1	-1.47741	9.02281e-05	antiSWR1	1.22699	6.51474e-06	YPR071W	-1.11226	8.37242e-08	OST5	-1.10797	4.41566e-09				antiPOC4	-1.4279	1.93421e-10	antiTRX1	-1.24279	0.000122862	YNR004W	-1.49952
antiTMA16	-1.0164	0.00038792	antiTDH3	-2.17787	0.0178271				antiMBA1	1.9867	9.39134e-06	antiALD3	-1.07332	1.94151e-05	antiYMR258C	1.67561	0.000742469	antiYDL199C	1.05698	0.0124851	antiDPP1	-1.33775	1.56758e-05	antiHBN1	-2.09408	0.000156367	antiYLR364W	-1.13493	9.38344e-05	antiRAX2	1.56628	6.53198e-06	SPG5	1.12823	9.39453e-08	antiKAR4	-1.27522	4.41566e-09				RPA34	-1.0237	2.02303e-10	antiDRS1	-2.74584	0.000124544	RNR2	1.00318
antiBRE1	-1.00712	0.000388384	antiKTR2	-1.29531	0.0178863				antiERG10	1.3168	9.5906e-06	antiGAL80	1.12391	2.00162e-05	antiRPL20B	1.10902	0.000763714	antiDSL1	1.47218	0.012913	antiTAF8	-1.1784	1.56758e-05	RCN2	1.08726	0.00015662	antiCNE1	1.67362	9.43556e-05	antiFAR11	1.5439	6.72809e-06	KNH1	-1.5528	9.78504e-08	antiPCA1	2.48311	4.59523e-09				antiCAN1	2.48257	2.02303e-10	antiCOT1	-1.10069	0.000128871	antiGPI2	-1.46333
antiYNR065C	1.64447	0.000409004	CIT2	1.48754	0.0181921				antiSDS22	1.69053	1.05441e-05	antiTOP3	1.12408	2.03361e-05	antiSAP185	-1.07313	0.000780952	antiCRT10	1.37652	0.0131225	antiTAH1	-1.54653	1.63462e-05	DEF1	1.16692	0.000161821	antiCRT10	1.82932	9.72619e-05	antiCHL1	1.41692	6.7595e-06	YER071C	-1.49941	1.03948e-07	antiPDX3	-1.18144	4.8231e-09				SDO1	-1.24499	2.03841e-10	antiADE5%2C7	-2.48754	0.000128871	CLB6	-1.48798
antiHEF3	1.24699	0.00044232	antiKAR4	-1.5739	0.0183875				antiPRS1	2.06463	1.15142e-05	PES4	2.46011	2.10791e-05	antiASE1	1.47473	0.00078425	YPS6	1.13378	0.0136699	antiYJR141W	-1.36499	1.67027e-05	antiSIP3	-1.26455	0.000169313	NRK1	-1.00927	0.000100583	antiMCM2	1.56276	6.80921e-06	TRP5	1.05888	1.04684e-07	RPC10	-1.00725	4.88756e-09				YLR065C	-1.05887	2.138e-10	antiMYO1	-1.60168	0.000132639	antiYLL023C	-1.04712
antiSGT1	1.08492	0.00044497	antiFRE6	2.03676	0.0183875				SEO1	1.82121	1.24602e-05	antiPRS1	2.03342	2.12353e-05	antiYOR228C	1.02976	0.000844532	GAS4	2.78512	0.013781	antiHBN1	1.35068	1.70152e-05	antiRAD28	-1.16974	0.000174882	antiYOR296W	1.33323	0.0001033	antiBOI2	1.13096	7.69313e-06	ZRT1	1.36525	1.08163e-07	antiMDN1	2.09761	4.93855e-09				IMP3	-1.21286	2.14849e-10	antiYGL157W	-1.76639	0.000132639	FMP45	1.39861
antiYGR126W	-1.06373	0.000483023	antiREX3	2.75158	0.0185356				antiYNL247W	-1.00274	1.29772e-05	SHC1	1.55914	2.12353e-05	CRC1	1.45647	0.000871704	antiYCR061W	1.04611	0.0142629	DAD1	-1.0233	1.77463e-05	antiHHT1	-1.44978	0.000176247	antiSPC25	-1.4837	0.000103886	antiTOS1	1.72965	7.87768e-06	GFD2	1.15863	1.13692e-07	antiCIN2	-1.05224	4.96877e-09				antiECM33	1.3944	2.18069e-10	antiDAL81	-2.07095	0.000134126	antiGPB1	-1.23378
antiYAT1	1.12974	0.000528472	antiUFD2	-1.18586	0.0189591				antiYDR306C	1.56597	1.4295e-05	antiRNH203	-1.14151	2.16662e-05	antiSKI8	1.06451	0.00088004	PHM8	1.06974	0.0142922	antiCOS111	1.65164	1.80711e-05	END3	1.07853	0.000176331	antiESC2	2.07004	0.000106781	antiGPI10	1.45447	7.9157e-06	antiYLR404W	-1.1612	1.21413e-07	antiCOX5B	-1.25909	5.09814e-09				antiYCG1	1.96291	2.26635e-10	SCM3	1.10011	0.000134126	CLB1	1.27154
antiATG2	1.19391	0.000529793	VPS72	1.18674	0.0191615				antiGSP2	1.22157	1.46234e-05	antiCLG1	1.98931	2.41268e-05	antiFLO10	1.42009	0.000890516	GAL7_GAL10	1.03691	0.0146682	antiMEC3	-1.34101	1.80711e-05	antiCRG1	-1.27784	0.000177744	antiRSC6	1.20924	0.000112734	antiFAA1	1.05137	8.23079e-06	LTP1	-1.03195	1.21595e-07	antiSTT4	1.83296	5.33686e-09				APC11	-1.44185	2.30197e-10	antiBFR2	-2.16309	0.000135763	JHD2	1.09371
antiDPL1	1.33037	0.000542443	RMD5	1.50348	0.0192222				GPM2	1.30471	1.51774e-05	RAD59	1.04525	2.69188e-05	antiPRS1	1.58995	0.00092474	antiMRPL16	1.09929	0.0149439	antiYSW1	-1.37472	1.8601e-05	RAD16	1.32954	0.000179215	ESBP6	1.01204	0.000119644	antiSRX1	-1.15284	8.67649e-06	antiYOR059C	1.30447	1.22544e-07	GSP2	1.39984	5.33686e-09				antiPGM2	2.21332	2.37855e-10	antiBAT1	-3.20424	0.000135763	antiYNL010W	-1.64771
antiWHI3	1.17173	0.000560221	antiCDC53	-1.113	0.0192222				antiCOS9	2.25998	1.61282e-05	antiMGS1	-1.07843	2.76356e-05	antiPLB2	1.33864	0.000932247	antiSTO1	1.57938	0.0150401	UBX6	-1.02661	1.8601e-05	INO4	1.13557	0.000179917	GAT2	-1.11368	0.000120192	antiPOM152	1.34566	8.94658e-06	antiSTE20	1.3245	1.26338e-07	EST3	-1.33044	5.43759e-09				antiDSL1	2.59508	2.50311e-10	antiYKU70	-1.64375	0.000136359	YOR238W	-1.33411
antiARL3	-1.40698	0.000564981	GAD1	1.08062	0.0192547				GIP1	1.43906	1.61343e-05	antiIRC10	1.99512	2.78975e-05	antiDPH2	1.8205	0.000941819	antiAGP1	1.21102	0.0152835	antiPAC10	-1.43365	1.94579e-05	antiMSG5	-1.33088	0.000202585	antiYNL024C	-1.05185	0.000123259	antiRRN6	1.73354	8.98783e-06	antiGIP2	-1.1617	1.30806e-07	antiARO10	-1.00822	6.244e-09				STE3	2.12702	3.08468e-10	antiBIM1	-1.58619	0.000137474	antiRPT3	-2.43116
GIP1	1.16381	0.000570785	FMP40	1.03158	0.0200988				antiALD3	-1.0325	1.67028e-05	antiFAA2	1.09232	2.98884e-05	antiRCY1	1.30742	0.000979116	antiPTR3	1.25363	0.0156799	antiYCR095W-A	1.67971	2.0919e-05	antiYOR052C	-1.21567	0.000212789	YKL071W	1.44897	0.000123259	antiSKN1	1.11142	9.02416e-06	antiNFT1	1.45175	1.34373e-07	antiPAN5	-1.79016	6.26193e-09				APQ12	-1.18932	3.10393e-10	antiUTR4	-2.06769	0.000138064	antiWTM1	1.02937
ARG3	1.10394	0.000575411	antiVMA9	-1.07058	0.0205616				antiYPR145C-A	-1.35074	1.71028e-05	antiYOS1	1.90029	3.02767e-05	antiTHR1	1.07261	0.000979437	antiMED7	1.04403	0.0158858	antiMRP20	-1.55002	2.21341e-05	CAR2	1.46817	0.000214013	GDH1	1.091	0.000125137	antiCRH1	1.40525	9.02949e-06	antiGAD1	2.33753	1.37257e-07	YPR145C-A	2.92149	6.46434e-09				SLX9	-1.37251	3.16066e-10	YKL071W	1.30015	0.000138075	antiYGL146C	-1.15151
antiFLO10	1.2574	0.000605732	YIL014C-A	-1.09099	0.0210765				antiSAN1	1.09812	1.78412e-05	antiMET30	1.63588	3.12814e-05	antiYOS1	1.42734	0.000988638	SSP2	1.20929	0.0161564	antiYIL152W	-1.25937	2.21341e-05	antiPCL1	-1.50412	0.000240433	antiRFC3	-1.00671	0.000125137	antiPNS1	1.07751	9.02949e-06	TRI1	-1.17	1.38149e-07	SPO14	1.02777	7.33121e-09				ECM1	-1.21888	3.17149e-10	antiSEC16	-1.03095	0.000138138	antiYLR404W	-1.25038
antiNVJ1	-1.2078	0.000640392	antiMAK10	-1.14087	0.0210765				IME1	-1.31138	2.01987e-05	HIM1	1.30546	3.1748e-05	antiCWC21	-1.09134	0.00107579	antiYDL156W	1.33788	0.016764	antiYNL086W	-1.38135	2.21341e-05	antiPHO4	-1.32555	0.000248167	POA1	-1.04567	0.00012941	antiGPG1	-1.07526	9.03152e-06	YCR015C	-1.73293	1.41408e-07	antiCPS1	-1.32348	7.62054e-09				YOR1	1.02493	3.24169e-10	antiIVY1	-1.25449	0.000138138	AAC3	1.30741
antiSPS4	1.07714	0.000680811	antiRPL9A	-1.17514	0.0212157				antiYDR391C	1.84306	2.23924e-05	MIM1	-1.02394	3.22434e-05	antiNAM8	1.27402	0.00109828	antiSSS1	1.21789	0.0168734	antiMOT2	1.07072	2.34958e-05	antiSNU56	-1.57727	0.000248167	antiSPR3	-1.45772	0.000131236	antiABP1	1.25747	9.16884e-06	antiGIC1	1.3348	1.60156e-07	TEC1	-1.03795	7.62054e-09				antiMRPL36	-1.79731	3.45658e-10	antiSLH1	-1.27644	0.000141293	UPC2	1.31273
YJL133C-A	-1.19131	0.000738342	antiPEP7	-1.00762	0.0212604				antiHSP42	1.49733	2.39841e-05	HES1	1.02118	3.26762e-05	SHC1	1.18209	0.00113522	YAP6	1.00199	0.0174767	antiPRE1	-1.15703	2.36526e-05	antiUTP20	-1.0733	0.000248167	antiECM19	-1.05357	0.000142825	antiYNL247W	1.01347	9.20591e-06	antiHNT2	-1.28104	1.62943e-07	antiYNL146W	-1.91923	7.81891e-09				antiMOT2	1.30964	3.55829e-10	FIT3	1.39569	0.000142377	PKH1	1.49229
antiRPS14A	-1.31489	0.000812633	IMH1	1.03381	0.0212604				antiSEF1	1.36865	2.47443e-05	antiRPS24B	1.44838	3.28194e-05	antiFUN26	1.47095	0.00114891	YDR119W-A	1.14534	0.0176985	SKS1	1.11946	2.38394e-05	antiGPG1	-1.01034	0.000268495	antiSAN1	1.12165	0.000143673	antiRPS26A	1.17403	9.60351e-06	antiUBP8	1.70731	1.65288e-07	GAT2	-1.55747	9.71553e-09				antiOMS1	2.84126	3.84474e-10	antiYNL165W	-1.49576	0.000146827	REX2	-1.13583
antiGLG1	-1.64008	0.00081741	antiBFR2	-1.2884	0.0213716				PES4	2.43728	2.50094e-05	antiHMG1	1.07535	3.33841e-05	antiYDR391C	1.35293	0.00115081	antiADY3	1.39519	0.0180197	antiALT2	-1.22246	2.3961e-05	antiBIK1	-1.11224	0.000287599	TEX1	-1.02842	0.000145076	antiPAB1	1.54588	9.65994e-06	antiYEN1	1.49963	1.73014e-07	HES1	1.62193	1.01688e-08				antiFRE2	1.33172	4.34303e-10	antiTRX2	-1.14817	0.000158301	YDR222W	-1.26259
antiBNA4	-1.13418	0.000993867	antiFEN2	2.0755	0.0214141				antiSGT2	-1.11537	2.56908e-05	antiVPS30	1.79418	3.37584e-05	DMC1	2.00379	0.00120808	antiARC35	1.44263	0.0183393	YHB1	1.09528	2.59036e-05	antiUTP5	-1.24265	0.000287599	ISU2	-1.172	0.000151344	antiZUO1	1.54996	9.94903e-06	antiPUS7	2.38112	1.904e-07	GYP5	1.07752	1.07607e-08				antiHXK2	2.22292	4.65329e-10	antiVMA22	-1.11973	0.000159238	antiSPR6	-1.48538
antiDCS1	-1.32257	0.00102778	SWC5	1.10975	0.0216287				antiILV6	1.27046	2.74525e-05	antiCHO1	1.36366	3.5482e-05	antiMRPL6	1.07565	0.00145082	antiRPS29B	-1.00988	0.0184348	antiMDG1	-1.59682	2.62083e-05	VTC4	1.64745	0.000291891	antiPDH1	-1.11256	0.000153912	antiRPS9B	1.70757	1.01722e-05	antiDNF3	1.4792	1.96299e-07	AUS1	1.07524	1.16876e-08				RBG2	-1.03525	5.01014e-10	antiCDC39	-1.70926	0.000161145	antiMMP1	2.258
antiPKP1	-1.17928	0.00120325	NOP16	1.19286	0.0218216				RAD59	1.033	2.7989e-05	antiSUI3	1.19811	3.73069e-05	antiYBL028C	1.05536	0.0014616	antiMF(ALPHA)1	2.18421	0.0186675	antiYEA4	-1.22089	2.71008e-05	antiBPH1	-1.13959	0.000296626	antiVMA10	-1.03962	0.000160875	antiCDC20	1.24233	1.07456e-05	SEN15	-1.23051	2.03634e-07	antiTOS8	1.29012	1.2037e-08				antiRPN7	2.91526	5.4546e-10	antiYOR1	-1.58768	0.000173289	antiBRN1	-1.64892
antiTPO1	1.16276	0.00121797	antiMRS11	-1.18695	0.0222103				antiRAD51	2.40427	2.80314e-05	antiYML020W	1.36391	3.73069e-05	REC8	1.71621	0.00150706	DLD3	2.24987	0.019112	antiYPL272C	-1.18905	2.71008e-05	PCL5	1.43049	0.00030895	antiTIF4632	1.3162	0.000167081	antiINP53	1.52436	1.12045e-05	YDL119C	-1.15852	2.15054e-07	antiSEC72	-1.72088	1.2708e-08				PDC5	1.02749	5.63081e-10	antiRPS11B	-2.14624	0.000173362	antiANP1	-1.92258
antiDFG16	1.40544	0.0012384	antiLYS14	-1.45885	0.0222103				antiGIP1	2.25893	2.86206e-05	antiGSM1	1.27773	3.99769e-05	antiCCT3	1.27951	0.00164071	antiCTF18	1.04717	0.0207726	antiYHR035W	-1.30218	2.73246e-05	antiMET22	-1.77994	0.000325491	NRG2	-1.02613	0.000194419	antiALG9	1.88739	1.2037e-05	DSE2	-1.01013	2.43065e-07	antiYGL108C	-1.7304	1.28426e-08				ARG5%2C6	1.27926	5.76055e-10	antiAPA2	-1.13091	0.000173556	MOG1	1.43009
antiMVD1	-1.39396	0.00125238	antiRPP1A	-1.31773	0.022253				POL4	1.29388	3.24185e-05	antiDIM1	-1.5356	4.13522e-05	antiYKL187C	1.16336	0.00175837	antiCDC10	1.65753	0.0209095	antiUTP11	-1.58213	2.91817e-05	antiYGR251W	-1.08909	0.000326379	antiYCR015C	1.28234	0.000225307	antiGIP4	1.91604	1.22631e-05	antiYLF2	-1.48501	2.43065e-07	antiIKS1	-1.80124	1.32113e-08				antiYOR051C	1.40808	6.15034e-10	antiNBA1	-1.89852	0.00018115	antiCHS7	-1.12956
antiPMT5	-1.10167	0.00125607	antiTOF2	-1.03865	0.0224386				UBP11	1.06789	3.24185e-05	antiSDS22	1.63334	4.48117e-05	antiCKS1	1.47384	0.00181344	antiYML119W	1.37546	0.0214055	antiTSA1	-1.01245	3.00568e-05	antiTAF2	-1.60789	0.000335066	CDC48	1.02767	0.00023152	antiMKT1	1.34778	1.41509e-05	antiMED11	-1.4832	2.53201e-07	antiYPL113C	-1.20146	1.33344e-08				antiMEC1	1.78218	6.34928e-10	antiMRPL36	-1.14541	0.000184635	antiSTE20	1.13509
antiKIN28	-1.21183	0.00130627	antiDUT1	-1.12168	0.0227422				antiSWI3	1.16172	3.33747e-05	YFR012W_YFR012W-A	1.61991	4.50196e-05	antiTPO1	1.07769	0.00187319	antiNOB1	1.22669	0.0218609	antiIME1	-1.45845	3.10101e-05	VTC2	1.00308	0.0003384	antiBCK1	1.14081	0.000233402	HUB1	-1.23721	1.50849e-05	antiERV46	2.04957	2.53971e-07	FTR1	1.18806	1.37572e-08				antiUTP10	2.75063	6.61768e-10	antiDBP6	-2.25926	0.000187239	antiYMR210W	-1.20125
antiARF1	-1.36279	0.00131327	TMA17	1.0293	0.0227919				OSW2	2.06377	3.3744e-05	antiTPO1	1.43731	4.53411e-05	antiDEG1	1.13718	0.00189365	antiYJR054W	1.71142	0.0240868	PBI2	1.4449	3.2322e-05	antiFUR4	1.38352	0.0003384	YBL029W	-1.11766	0.000234636	antiMUB1	1.84802	1.51188e-05	YOL097W-A	-1.27342	2.55338e-07	LEE1	2.13525	1.38334e-08				antiREG1	2.039	6.69983e-10	antiSIN3	-2.64119	0.000188417	antiHOR2	-1.44527
antiNOC4	1.29856	0.00132941	antiMGR1	1.36998	0.0229498				antiPOL1	-1.00914	3.59587e-05	SIR4	1.05343	4.55265e-05	antiYER184C	1.02306	0.00191664	antiGLN1	-1.35576	0.0245357	antiTAF11	-1.47183	3.42922e-05	KEL3	1.11043	0.0003384	antiJLP1	-1.6242	0.000241609	antiTRM112	1.17842	1.61852e-05	antiTCB3	1.42817	2.55338e-07	antiSAE2	-1.59964	1.40144e-08				RPC34	-1.0271	7.18229e-10	antiYBR285W	-1.35506	0.000188417	antiCDS1	-1.70248
antiPEP1	1.03581	0.00141908	PEP12	1.28595	0.0231153				antiCHO1	1.34066	3.59993e-05	antiFLO10	1.71147	4.72919e-05	antiRTT107	1.26924	0.00197769	antiYJL127C-B	1.01876	0.0251071	CYB2	1.14606	3.5345e-05	antiYML003W	-1.04236	0.000339019	DIC1	-1.01097	0.000242874	antiPES4	2.09205	1.75165e-05	SWF1	-1.34405	2.76036e-07	antiLSM1	-1.41897	1.40703e-08				YGR021W	-1.39856	7.51947e-10	antiHPT1	-2.09105	0.000189773	antiIZH3	-1.56126
antiPRP21	-1.02515	0.00143868	HSP12	2.2434	0.0239708				antiTCB3	1.1322	3.99038e-05	antiHSP42	1.46576	4.75224e-05	antiCEM1	4.41527	0.00208049	PAI3	1.39818	0.0254528	antiYKL133C	-1.47307	3.5849e-05	antiALD3	-1.02633	0.000363444	AYT1	-1.16671	0.000269752	antiPCA1	1.90087	1.87591e-05	antiTOP3	1.33258	2.77968e-07	antiMRP21	-1.55797	1.40703e-08				antiIES1	2.80807	7.51947e-10	antiCDC33	-2.25836	0.000191444	antiCTT1	-1.04822
antiCLN1	1.17651	0.00144389	YHC1	1.13594	0.0239964				STR3	1.22107	4.3449e-05	antiDEP1	1.55146	4.75794e-05	antiFRQ1	2.11621	0.0021152	FMS1	1.70737	0.0258963	antiYDL025C	-1.25881	3.79845e-05	RPS25B	1.25949	0.00037345	MEI4	-1.50337	0.000274892	antiHOS2	1.3118	2.17148e-05	antiYNL144C	-1.6316	2.89375e-07	TIM21	-1.00091	1.62962e-08				antiFIT3	3.46006	7.81431e-10	antiRPS1B	-2.11153	0.000196718	YIR007W	1.26249
antiTPT1	-1.36341	0.00145397	antiMRPS8	-1.07328	0.0245403				antiMDL1	1.92453	4.38384e-05	BIO3	1.05485	4.8466e-05	antiGRE1	-1.07931	0.00212538	POX1	1.29816	0.0260444	RRP14	1.51524	3.8155e-05	antiIRA1	1.67551	0.000377196	antiSMC2	1.51296	0.000287121	antiRPS0B	1.63585	2.24768e-05	antiPSP2	1.89917	3.02383e-07	antiTOM1	2.03359	1.68865e-08				antiELM1	2.25725	7.88128e-10	antiRIM15	-1.51792	0.000199562	IMP2'	1.57677
antiWHI2	1.11668	0.00155124	antiRRP12	-1.39943	0.0245403				ZIP1	1.00974	4.45458e-05	antiYCR095W-A	3.62846	5.05741e-05	DIA3_YDL022C-A	1.03273	0.00217635	antiPHO89	1.10898	0.0269702	antiYBR261C	-1.31494	3.85818e-05	antiCTF4	-1.25078	0.000391216	antiWHI5	-1.30904	0.000289112	antiNAB6	1.234	2.37526e-05	antiYIR035C	1.76577	3.09455e-07	CYB2	1.46269	1.75578e-08				SNO1	2.6223	7.88128e-10	antiGLN1	-2.98315	0.000201676	antiNAT2	-1.21028
antiYUR1	-1.08502	0.00158318	FMC1	1.03001	0.0246691				antiMED11	-1.08546	4.53182e-05	antiRPL20B	1.38213	5.08735e-05	YKR015C	1.34736	0.00244816	HBN1	1.06644	0.0276994	antiKAR4	-1.32478	4.02018e-05	antiRCR1	-1.85412	0.000405985	antiASK10	1.2787	0.000293275	antiRPS24B	1.42058	2.83361e-05	antiTHI3	-1.03636	3.3439e-07	antiMSB3	-1.74438	1.82916e-08				PRB1	1.14369	8.18559e-10	antiNSG2	-2.09775	0.000201871	RPL35B	-1.00481
antiYOL073C	-1.02191	0.0016752	antiSCS22	-1.32111	0.0247689				antiTRA1	1.08301	4.54097e-05	antiYVC1	2.28523	5.08735e-05	YLR149C	1.01824	0.00249132	antiYGR161W-C	1.11804	0.0283671	antiLOT6	-1.50627	4.23012e-05	SPT6	1.09356	0.000416564	AVT3	1.10159	0.000296125	antiYOR302W	1.80944	2.83361e-05	HYM1	-1.06343	3.38441e-07	antiYGL146C	-1.04817	1.86885e-08				PIS1	-1.05071	8.19773e-10	antiAPC5	-1.56017	0.000204727	ENO2	1.02181
antiKEL2	1.23636	0.00168495	antiMLP2	-1.49313	0.0254042				antiMMM1	1.89243	4.63957e-05	antiSGV1	1.19458	5.30563e-05	antiYFR012W	1.15045	0.00262694	YHR177W	1.02341	0.0295941	antiSPR6	-1.38101	4.23688e-05	antiECM30	1.35073	0.00043145	antiYMR258C	1.80198	0.000307265	antiERG13	1.3984	2.8656e-05	antiRAD9	2.08687	3.8328e-07	antiHAP5	-1.44624	1.87376e-08				antiTEL1	1.67171	8.24896e-10	antiCTR9	-1.63986	0.000209832	antiDIC1	-1.10415
antiGCN4	1.16447	0.00170588	GPM2	1.24925	0.0255233				antiAAC3	1.724	4.7269e-05	antiMOG1	-1.0753	6.35343e-05	antiDST1	-1.02139	0.00274498	antiRPL22B	-1.2442	0.0298575	BUD22	1.01894	4.33603e-05	CWC24	1.00722	0.000432786	antiYLR177W	1.31371	0.00031191	antiCSF1	1.11639	2.93982e-05	antiERG10	1.52581	3.92654e-07	antiMDH2	1.7005	1.96986e-08				antiHXT3	1.56608	8.88733e-10	antiTHS1	-1.87134	0.000211169	PRB1	1.25078
antiGFD1	-1.40886	0.00176569	antiHSP78	-1.18689	0.0259744				antiASK10	1.55143	4.85226e-05	antiRPS24A	1.39054	6.35739e-05	antiCDC16	1.02224	0.00278431	CAT8	1.0092	0.0298575	antiIMG1	-1.07167	4.52025e-05	EXO84	1.00816	0.000475855	antiPEX2	1.09519	0.000314059	antiCLB6	1.1174	2.97326e-05	antiRRI1	1.5388	3.99774e-07	PAC11	1.15819	2.08228e-08				MPS2	-1.25334	1.02353e-09	antiFYV8	-1.01347	0.000211169	antiYOR097C	-1.31455
antiARO2	-1.65937	0.00179565	antiVMA4	-1.1206	0.0260227				antiNDD1	1.87853	4.93449e-05	antiSHY1	1.03239	6.35739e-05	antiYOR338W	1.15704	0.00294651	CIT3	1.18488	0.031357	antiGRX7	-1.19243	4.61597e-05	antiYCR023C	-1.2182	0.000493788	YDR357C	-1.07206	0.000314059	antiPEP1	1.29876	3.2092e-05	GLC3	1.32119	4.20033e-07	OST4	-1.22615	2.31749e-08				antiILV2	2.43942	1.07047e-09	antiRPN8	-2.19153	0.000211169	antiMTG2	-1.44951
antiMPS1	-1.42639	0.00189256	antiSWI5	-1.28997	0.0266504				antiZEO1	-2.96995	4.93449e-05	antiYDR391C	1.89437	6.52902e-05	antiSCH9	1.02929	0.00321125	antiYPR015C	1.79026	0.0327312	AMS1	1.07535	4.69999e-05	antiPRM2	-1.02871	0.000525123	ARE1	1.20441	0.000314819	CGR1	1.11023	3.23448e-05	antiWSC2	1.44071	4.2763e-07	antiHNT2	-1.353	2.3628e-08				RCO1	-1.01798	1.17659e-09	antiNUP42	-1.82677	0.000219233	antiAGP3	2.0482
antiMMT1	1.34864	0.00198768	YCR015C	-1.12937	0.0269784				antiTYS1	1.45326	5.14296e-05	DIT1	1.49545	6.64286e-05	NSE3	1.30672	0.00336757	antiNOG1	1.12457	0.0329598	QCR10	1.10898	4.7147e-05	antiVAC7	-1.06112	0.000532567	antiFAP1	-1.27804	0.000314819	antiMPH1	1.13401	3.24484e-05	antiCTT1	-1.04226	4.32397e-07	antiYKL115C	-1.48423	2.48634e-08				GCV2	1.12907	1.2113e-09	antiPMD1	-2.29547	0.000219233	antiALG14	-1.41493
antiTEL2	-1.02515	0.0020051	antiYNL247W	-1.2653	0.0270174				PHM7	1.03273	5.5881e-05	antiMTL1	2.16138	6.80726e-05	antiMET30	1.15559	0.00351214	antiYCR043C	1.36188	0.0331483	antiTIM54	-1.46402	4.7147e-05	antiMRL1	-1.13285	0.00055113	YDR286C	-1.18215	0.000337245	antiNAM8	1.61206	3.28385e-05	YFL052W	1.52014	4.34253e-07	antiRAD28	-1.32637	2.71716e-08				RPC19	-1.00521	1.26048e-09	antiUBP1	-1.2439	0.000219729	ISU2	-1.10124
antiCBC2	-1.34442	0.00217726	antiYDL133W	1.70607	0.0270174				antiRCY1	1.85285	5.62217e-05	antiPCA1	1.99363	7.08772e-05	antiSSA2	-1.73783	0.0040931	antiSWR1	1.12154	0.0336086	antiDON1	-1.33743	5.03872e-05	antiBMH1	-1.02488	0.000555408	TIM9	-1.01671	0.000350333	antiYEL043W	1.59584	3.35337e-05	VPS73	1.14107	4.45148e-07	antiISY1	-1.51181	2.75329e-08				antiYER156C	-1.24903	1.27682e-09	antiHST4	-1.85839	0.000225442	YAP1801	1.0646
antiSSA1	1.2189	0.00217726	RSM28	1.00702	0.0271243				antiCOF1	-1.17862	5.80362e-05	antiNAB2	1.3499	7.35827e-05	antiNSR1	-1.04318	0.00426763	SNO1	1.89711	0.034547	antiPEX1	-1.01765	5.20556e-05	antiGYP5	-1.04173	0.000567614	antiAPP1	1.80186	0.000374411	antiYDR119W	1.43401	3.42294e-05	NFT1_YKR104W	1.16995	4.87216e-07	PBI2	1.38275	2.82191e-08				OPT2	-1.32454	1.2838e-09	antiNUP145	-1.63159	0.000225442	YPS6	1.77803
antiRAD24	-1.50752	0.00227423	antiASI2	-1.0902	0.0273631				antiMRPL6	1.43325	5.85965e-05	antiPGU1	1.44851	7.54181e-05	antiUPS1	1.17746	0.00430488	antiVBA2	1.15538	0.034932	antiYKL115C	-1.05905	5.27681e-05	antiMEI4	-1.00333	0.000567614	antiYPT32	-1.54861	0.000382182	antiMET6	1.437	3.43925e-05	antiTFB3	-1.19096	5.00214e-07	STE14	-1.12657	2.82192e-08				BUR6	1.01609	1.33254e-09	antiNMA111	-2.45731	0.000229397	antiARP6	-1.26213
antiSPE3	-1.19278	0.00235297	antiLHS1	1.08474	0.027497				antiILV1	1.61768	5.96809e-05	antiCKS1	1.8849	7.85125e-05	antiPRS3	1.50852	0.00434458	antiRPS14A	1.03385	0.0355373	antiDBP8	-1.41581	5.55553e-05	antiTIM18	-1.2718	0.000575828	antiFMP16	-1.05279	0.000386583	antiULP2	1.36553	3.52544e-05	antiAVT3	1.83524	5.17797e-07	PCL2	-1.04521	2.8572e-08				antiESC1	1.26491	1.35775e-09	antiAPL3	-1.32133	0.000234438	antiLUC7	-1.59757
antiDEF1	-1.37505	0.00236047	SLF1	1.29468	0.0277608				YNL277W-A	1.93465	6.2448e-05	SPS19	2.00866	8.00664e-05	antiYDR306C	1.03619	0.00434697	antiMBF1	-1.07034	0.0355525	antiGLG1	-1.27326	5.63462e-05	HSP78	1.10592	0.000576538	YNR064C	1.79135	0.000390825	antiPIN4	1.53318	3.58408e-05	antiRIM21	1.36961	5.28011e-07	SPS100	1.76079	3.00248e-08				antiCPS1	-1.49613	1.38394e-09	antiSSC1	-2.37831	0.000234438	FRT2	1.63184
antiALD6	-1.03916	0.00237929	GSC2	1.15691	0.0278933				antiSKI8	1.32647	6.35649e-05	YJL038C	1.4788	8.14477e-05	antiICE2	1.13681	0.00436611	GAC1	1.15778	0.0356751	antiFMP29	-1.11945	5.72768e-05	antiPDE1	-1.51621	0.00058341	antiYMR291W	1.42598	0.000412684	antiWSC2	1.20252	3.60651e-05	antiYNR065C	2.3089	5.28191e-07	DFG10	-1.1494	3.30017e-08				antiRBG2	2.77386	1.39249e-09	antiCCT3	-1.8148	0.000235917	YGR130C	1.03035
antiIES4	-1.63872	0.00242364	antiSRB5	-1.07334	0.0286158				antiARE1	1.32698	6.85726e-05	antiOST3	1.12831	8.16201e-05	antiLST4	3.00744	0.00436611	antiNUP116	1.38634	0.0360095	antiSNU71	-1.21581	5.73951e-05	antiRIM1	-1.73263	0.000618893	antiYFR007W	-1.10298	0.000413589	antiYMR291W	1.44983	3.67464e-05	HMF1	-1.17459	5.58484e-07	IDH1	1.05581	3.56834e-08				antiPEP4	-1.75757	1.40841e-09	antiAIR1	-1.15496	0.000238968	NCB2	-1.00025
antiYNL144C	-1.7604	0.00243071	antiADH1	-1.45545	0.0287995				antiCEM1	5.62046	7.05355e-05	antiASP1	2.27278	8.16201e-05	antiYGL176C	1.05659	0.00438862	antiSOM1	1.57989	0.0379599	antiZDS2	-1.0896	5.83931e-05	antiYAP1802	-1.02632	0.000630386	antiNRG2	-1.16303	0.000452788	antiUBI4	1.30019	3.67464e-05	PET130	-1.09644	5.58484e-07	SFC1	2.79461	3.58418e-08				antiPER1	-1.13332	1.50828e-09	antiISU1	-2.53389	0.00024006	antiLSM1	-1.33738
antiATP3	-1.06213	0.00243966	antiRNH203	-1.14017	0.0290132				antiTPO1	1.40575	7.52874e-05	antiVRP1	1.33842	8.23523e-05	antiYVC1	1.82373	0.00445536	antiEMP24	-1.15282	0.038745	antiSRP14	-1.19511	5.8763e-05	antiFMP36	-1.19837	0.000654206	antiTSA2	-1.26566	0.000458387	antiRPL24B	1.60636	3.8503e-05	NRK1	-1.26619	5.58484e-07	antiPUT4	1.8696	3.76992e-08				antiLYS20	-1.11501	1.56595e-09	antiOCA5	-2.54673	0.000241455	antiTRF5	-1.45553
antiARP7	-1.67117	0.00245499	BAG7	1.52097	0.0290132				antiCCT3	1.83866	7.66007e-05	antiSEF1	1.28657	8.25767e-05	antiSRL1	1.25405	0.00447702	antiFIT2	1.17376	0.0389878	antiNUS1	-1.06374	5.8763e-05	antiTFC6	-1.37527	0.000657678	antiRIM21	1.15328	0.000463663	antiRPB7	1.54059	3.86739e-05	antiBUD20	-1.20591	5.60065e-07	antiPRE6	-2.32398	4.04329e-08				RPA12	-1.28619	1.62949e-09	antiECM29	-1.96468	0.000242801	YJL133C-A	1.24145
YJL144W	1.05417	0.00247265	antiUTP14	-1.18371	0.0290191				antiYMD8	1.83921	8.06226e-05	antiTHI2	1.36847	8.66264e-05	antiWSC3	-1.23146	0.00461594	antiFZF1	1.60838	0.0405204	antiYIM1	-1.4008	5.92574e-05	FIT2	1.07131	0.00067289	antiYPL257W	-1.04406	0.000475551	antiTRA1	1.00299	3.88827e-05	antiUBC13	-1.20972	5.69016e-07	antiCOQ3	-2.35479	4.24011e-08				antiNRG1	-1.35426	1.67274e-09	antiATP19	-1.28355	0.000243966	PAC11	1.07194
antiEMI2	-1.07604	0.00266294	IRC15	1.38361	0.0291128				CRC1	1.79037	8.07279e-05	antiFIG4	1.4276	8.79101e-05	antiYMR185W	3.28004	0.00475243	YOR011W-A	2.09523	0.0406323	antiFUI1	1.13467	6.01018e-05	GAT1	-1.02525	0.00067289	YMR122W-A	-1.09867	0.000478108	antiEDC3	1.2895	4.11039e-05	antiCRT10	2.2266	5.85609e-07	antiSNT2	1.3628	4.47486e-08				antiJSN1	2.07272	1.71495e-09	antiTOM7	-1.52246	0.000248118	antiBDH1	-1.43886
IRC18	1.55622	0.0027172	YLR225C	1.13409	0.0293324				antiACA1	1.50807	8.26258e-05	antiACH1	2.49393	9.21036e-05	SSP1	-1.07857	0.00510373	antiRTT107	1.23229	0.040987	RRP15	1.25745	6.03606e-05	antiRFC4	-1.3082	0.000681907	antiFLO10	1.46343	0.000479619	antiRPL29	1.22786	4.12265e-05	antiYOR051C	-1.4537	6.05302e-07	antiLSM12	-1.26579	4.62462e-08				antiCDD1	-1.72258	1.78134e-09	antiMDE1	-1.26284	0.000249531	WSC4	1.33368
WSC4	-1.17835	0.0028151	PBI2	1.45022	0.0308258				POT1	2.24321	8.53892e-05	UBP11	1.02581	9.88729e-05	antiSNF3	1.65935	0.00539014	antiDUO1	1.28211	0.0416525	antiELA1	-1.44118	6.03606e-05	RRI2	1.02264	0.000691954	MFA2	-1.06152	0.000485236	antiADY3	1.54848	4.15065e-05	antiYER140W	1.6846	6.05967e-07	antiIDP2	-1.25726	4.67213e-08				antiBUB3	-1.20269	1.82485e-09	antiYNL024C-A	-2.96092	0.000253562	antiRPA14	-1.0816
antiYOR296W	1.01645	0.00286522	PRP40	1.02533	0.031451				antiUPS1	1.64092	8.84012e-05	antiMRI1	1.53028	0.000100357	antiMCK1	1.77673	0.00541889	SPS19	1.66907	0.0433133	antiIES2	-1.39473	6.08837e-05	antiCSM2	-1.25391	0.000706875	antiYOL038C-A	-1.07744	0.000486931	antiTGL3	1.276	4.1691e-05	antiSIA1	1.91003	6.21589e-07	antiYOR131C	-1.96577	4.71979e-08				antiYSP2	2.10437	1.8253e-09	antiINP52	-1.49304	0.000253562	antiACF4	-1.90875
antiRNH70	-1.05461	0.0028907	antiSCH9	1.36806	0.0315325				antiYET2	1.47833	9.27621e-05	antiCCW14	1.79824	0.000104976	antiGIR2	-1.0017	0.00541889	SFC1	1.52624	0.0446896	TPM1	1.05398	6.08837e-05	antiMSR1	-1.11175	0.000716484	antiSOM1	2.01409	0.000488159	antiPBP4	1.21243	4.18143e-05	YMR122W-A	-1.27587	6.25973e-07	antiSAM3	-1.15939	5.1961e-08				TRM112	-1.59072	1.85354e-09	antiADH1	-1.8116	0.000254655	antiYET3	-1.58076
antiAFG2	1.21695	0.00315655	antiMDG1	-1.16584	0.0321				antiMUD2	1.35942	9.75914e-05	antiYLR356W	1.9766	0.000105323	antiCOS12	2.37965	0.00557916	antiPOP2	1.2681	0.044858	antiSEC3	-1.08842	6.12634e-05	antiRIT1	-1.3273	0.000768777	antiADO1	1.16353	0.000506638	antiSEF1	1.27631	4.57256e-05	antiGID7	1.31479	6.47004e-07	antiPIN2	-1.37145	5.33024e-08				antiYJR054W	2.99187	1.85354e-09	antiYJL150W	-3.09346	0.00025606	antiBIK1	-1.20945
antiTDP1	1.09523	0.00315655	TOA1	1.09014	0.0330944				antiSHY1	1.01121	9.85957e-05	antiMEC1	1.12549	0.000106006	antiYMR027W	1.67537	0.0061389	antiYIL057C	2.00417	0.046041	antiMED7	-1.59266	6.17679e-05	antiIMG1	-1.16275	0.000796861	antiBUR6	-1.08005	0.000519142	antiPIN3	1.47591	4.69998e-05	antiYOR296W	1.57164	6.5149e-07	CAR1	-1.09257	5.46133e-08				antiGEA2	2.499	1.86354e-09	antiYPL229W	-1.08962	0.00025606	antiNPA3	-1.43359
antiUTP14	-1.1316	0.00338838	antiGAD1	1.60802	0.0334461				antiPET130	1.29394	9.88274e-05	JLP1	1.13179	0.000112008	OSW2	1.43832	0.00636587	antiPLB2	1.21438	0.0468425	antiYOL114C	-1.37678	6.17679e-05	antiDCN1	-1.03254	0.000811362	antiYDR387C	1.47479	0.000521478	antiYOR228C	1.29126	4.75405e-05	antiATM1	1.44632	6.60903e-07	antiMED11	-1.69549	5.87695e-08				YBL107C	-1.38264	2.08367e-09	antiTRM7	-1.31582	0.000256358	MRPL44	-1.00713
antiUTP30	-1.8431	0.00341814	antiVAC7	-1.24218	0.0334989				antiAIP1	1.12016	0.000101306	antiFRQ1	2.66495	0.000113709	antiILV1	1.12332	0.00652193	antiARF1	-1.05737	0.0487195	antiCAP2	-1.19979	6.26121e-05	antiENT4	-1.2864	0.000832436	antiFMP36	-1.16589	0.000534215	antiYOR296W	1.24548	4.82446e-05	SHE2	-1.05327	6.79794e-07	antiYCR007C	-1.15457	6.16383e-08				IRC23	-1.2535	2.11554e-09	antiNAB2	-1.78998	0.00025975	antiPAC10	-2.03813
antiEXO84	1.03732	0.00349649	antiBYE1	-1.00613	0.0334989				YFR012W_YFR012W-A	1.46335	0.000101826	antiNGR1	1.69095	0.000115229	antiMMM1	1.30435	0.00687782	antiLDB7	-1.03467	0.0489953	antiYCR061W	1.35252	6.26121e-05	antiPET494	-1.12562	0.000863575	antiLYS4	1.1869	0.00054598	antiAPL6	1.34283	4.82446e-05	SEC22	-1.08808	7.42019e-07	PDC6	2.46859	6.41287e-08				antiPSK2	2.72264	2.1693e-09	antiSNT309	-1.06663	0.000262727	antiPCL7	-1.53342
antiQCR6	-1.24144	0.00353712	antiMAD1	-1.45361	0.033519				antiPHB1	1.92831	0.000103218	antiREC8	1.93326	0.000118617	antiFMT1	3.94105	0.00703555	antiGIC1	1.05637	0.0489953	QCR2	1.21701	6.59657e-05	antiRIM9	-1.05867	0.000867074	antiINH1	-1.25243	0.000566403	antiRPL12A	1.612	4.96857e-05	antiSAN1	1.39332	7.77117e-07	YLL014W	-1.16567	6.70371e-08				antiKAP95	1.82524	2.18461e-09	antiSAT4	-1.7055	0.000265669	YGR110W	1.72583
antiPGA2	-2.1189	0.00366059	YLR271W	1.19012	0.033519				antiCOS12	3.13557	0.000110865	antiGIP1	2.13659	0.000127861	antiRFT1	1.1394	0.00716663	antiPRE5	1.1521	0.049279	YMR206W	1.95762	6.59657e-05	antiNPA3	-1.23531	0.000892899	antiYEN1	1.06189	0.000566774	antiAPP1	1.81558	5.18402e-05	CAC2	1.01382	8.50185e-07	antiPSK2	2.3614	7.24599e-08				antiPTI1	-1.19294	2.3001e-09	antiPOM152	-1.59127	0.000281559	HES1	1.47982
antiAVT3	1.07602	0.00375859	YLR346C	1.37316	0.033519				antiPOG1	2.03857	0.000111187	antiCGR1	-1.01431	0.000128292	antiRPP0	-1.33422	0.0074427				antiFUR4	1.07333	6.666e-05	antiTHP2	-1.06013	0.000908384	antiSLI1	1.13357	0.000573773	antiSLA2	1.48235	5.27982e-05	antiCNE1	1.88165	8.5562e-07	antiSUB1	-1.15422	7.4885e-08				antiSCH9	2.03708	2.45245e-09	antiRSC1	-1.54139	0.000281559	YLR177W	1.29291
antiVPS68	-1.06299	0.00387754	YKL071W	1.69235	0.0336993				antiCKS1	1.84511	0.000112609	IME1	-1.22683	0.000128292	YFR012W_YFR012W-A	1.03018	0.00778283				NDT80	1.31947	6.72524e-05	PHM8	1.59993	0.000916354	YDR132C	-1.08716	0.000573773	antiRPL43A	1.1682	5.33526e-05	TYW3	-1.02271	9.67871e-07	antiRFC3	-1.22031	8.21269e-08				antiPSP2	2.05868	2.46617e-09	antiEXO1	-1.20081	0.000284877	MAL11	1.74488
antiINP53	1.10455	0.00387953	HSP26	1.79048	0.0337651				PDC6	1.96571	0.000115245	antiNUP53	1.23726	0.000128292	antiYGL159W	1.11107	0.00798884				LDB18	-1.11811	6.9375e-05	antiRVS167	-1.18962	0.000949823	IME1	-1.14545	0.00057869	antiPEX6	1.09616	5.60795e-05	antiSEC18	1.56226	1.05217e-06	antiTRS120	2.21517	8.6002e-08				antiVPS13	2.72388	2.5619e-09	antiRRN11	-2.82608	0.000285746	antiBRE1	-1.53007
antiYGR277C	-1.07658	0.00392843	antiJLP2	-1.20996	0.0339413				antiJSN1	1.46195	0.000119551	antiATP3	1.06735	0.000130757	antiCOX15	2.41028	0.00856846				antiABP1	1.60667	7.54149e-05	antiUTP11	-1.32666	0.00101284	antiSIA1	1.48462	0.000603247	antiLPE10	1.06618	5.66708e-05	antiSNT309	-1.46552	1.12312e-06	antiNRG1	-1.25914	8.85742e-08				YRO2	1.40281	2.57184e-09	antiARP8	-1.68486	0.000287695	YJL213W	1.21348
antiPIR3	1.36258	0.00397712	MRPS17	1.17149	0.0341596				antiPPZ1	1.91902	0.000121884	PHM7	1.00908	0.000130983	antiEAF3	1.14556	0.0086353				antiMDR1	-1.12567	7.72878e-05	antiCDC23	-1.06024	0.00104172	YIL014C-A	-2.25032	0.000607642	antiHSP42	1.41129	6.06926e-05	antiATG2	1.71367	1.13942e-06	NMD4	-1.0323	9.10016e-08				antiYKL187C	1.75229	2.58623e-09	antiRPL26B	-1.51631	0.000288502	APC11	-1.05588
antiMGA1	1.0347	0.00443938	antiPOM152	-1.05196	0.0341596				antiDFM1	1.79651	0.000122655	antiSWI1	1.75993	0.000133582	antiSDS22	1.0402	0.00896108				antiPDE1	-1.22361	7.72878e-05	PAF1	1.03813	0.00105722	ADE3	1.053	0.000642793	antiFUI1	1.09316	6.19191e-05	antiHSP30	-1.37169	1.14921e-06	ECM4	1.47387	9.60197e-08				antiYNL024C	-1.43298	2.94805e-09	antiYNL295W	-2.21386	0.000290413	YHI9	1.06549
antiDNF1	1.10471	0.00447772	antiVMA8	-1.38908	0.0354208				antiMEP3	1.00834	0.000126007	GPM2	1.20296	0.000139853	antiFRS1	1.26555	0.00902331				antiLAP4	1.48977	7.8064e-05	antiSPR6	-1.03462	0.00106836	antiYHR140W	-1.25902	0.000661595	antiRPS18A	1.06717	6.9676e-05	YML087C	-1.12125	1.19089e-06	antiRUP1	-1.07182	9.82921e-08				antiIDP2	-1.59772	2.94992e-09	antiVMA8	-1.01225	0.000293039	BDF1	1.12118
antiNAF1	-1.07352	0.00453846	HXT5	1.57536	0.0354916				antiPMT3	1.32001	0.000132665	antiHIS4	1.75678	0.000146331	antiYMR315W	1.03878	0.00923824				antiYNG1	-1.00241	7.81625e-05	antiFSH2	-1.07076	0.00107862	antiYMR244C-A	-1.20289	0.000669523	YTP1	1.29434	7.47848e-05	antiRNH203	-1.4194	1.19697e-06	antiHAA1	1.48911	9.91261e-08				antiLAA1	1.58944	3.04171e-09	antiMSB1	-1.38713	0.000294888	TMA10	2.27366
antiTFG1	-1.33819	0.00460493	antiADO1	1.09935	0.0355906				antiSNF3	2.18102	0.000134286	antiFLO5	5.49791	0.000151116	antiYEF3	-2.13427	0.00937814				antiPBP2	-1.53418	8.00844e-05	antiMET16	-1.03747	0.00111449	antiTCB3	1.08028	0.000671475	antiARP8	1.02336	7.47848e-05	antiDAK1	1.609	1.19697e-06	IMP2'	1.15806	1.00912e-07				antiTCB3	1.55219	3.04171e-09	antiLSM8	-1.1257	0.000294888	ALD6	2.6054
antiPET117	-1.00298	0.00477475	STF2	1.65081	0.0357727				antiMCK1	2.32275	0.000134286	antiAPA2	-1.20151	0.000154733	antiCLN1	3.05424	0.00980659				antiFSH2	-1.21829	8.1428e-05	antiSAM35	-1.03676	0.00112213	antiYHR131C	1.65054	0.00069911	antiYNL140C	1.04987	7.63956e-05	antiKAP122	1.91486	1.2174e-06	YGL194C-A	-1.41011	1.07826e-07				antiYHL008C	1.92625	3.31538e-09	antiRSM18	-3.43112	0.000299579	antiGOS1	1.47108
antiYCG1	1.07733	0.0048011	YJL133C-A	1.98856	0.0357983				antiNUP53	1.06169	0.000136275	antiYMR258C	1.88429	0.00017196	antiPIN3	1.0104	0.010163				antiORC2	-1.33197	8.1428e-05	antiCGR1	-1.17349	0.00117417	antiAHC2	-1.9628	0.000700761	antiTIM44	1.11486	8.03939e-05	YOL159C-A	-1.12002	1.27537e-06	antiHOL1	1.68586	1.08222e-07				antiLYS2	2.02666	3.32223e-09	HSP26	1.23048	0.000301268	antiYNL217W	-1.19037
antiGCD1	-1.24928	0.00490084	antiSSY1	1.93733	0.0361008				antiMMP1	2.00009	0.000142982	antiYEL047C	-1.01003	0.000172202	antiCHS1	1.83184	0.0103642				antiXRS2	-1.24021	8.1428e-05	antiLUC7	-1.16313	0.00121415	antiTPC1	-1.0436	0.0007194	antiMRPL27	1.14056	8.03939e-05	BNA6	-1.09352	1.2807e-06	antiGPB1	-1.21291	1.08423e-07				antiBOI1	2.32728	3.34066e-09	antiPDR5	-2.02354	0.000316459	TDH1	1.42109
UGA4	-1.393	0.0052745	antiNIP100	-1.14694	0.0364782				antiASP1	2.08894	0.000151711	antiSRL1	1.67779	0.000174619	YNR064C	1.26933	0.010381				antiYDR026C	-1.05544	8.62345e-05	antiDPH5	-1.00081	0.00121415	antiDMA1	1.22436	0.000720265	antiDLD3	-1.13853	8.85253e-05	antiMPE1	-1.02841	1.28832e-06	antiYJR011C	-1.3788	1.15807e-07				GPG1	1.55062	3.61737e-09	antiKEL1	-2.87539	0.000316459	AGP2	1.10016
antiSSY1	1.41319	0.00532511	antiRAD17	-1.31926	0.036741				antiYML053C	1.59398	0.00015323	antiFRS1	1.74824	0.00017962	KIN82	3.33723	0.0109444				SIP4	1.72832	8.69303e-05	antiKRR1	-1.16194	0.00123295	antiYHL008C	1.34468	0.000727441	antiVPS1	1.32793	8.85253e-05	antiPGD1	1.3828	1.32109e-06	antiSNF3	2.69816	1.22322e-07				antiPOR2	-1.50827	3.75347e-09	antiTFC4	-1.53192	0.000316459	YOR289W	1.395
antiHIS4	1.11731	0.00532785	antiPAM16	-1.44898	0.0367467				antiYOR228C	1.27123	0.000159302	antiAVT7	1.63665	0.000186568	antiTCP1	1.50377	0.0110759				YPL113C	1.02689	8.72274e-05	antiCIN4	-1.02645	0.00123295	CAC2	1.06334	0.000733424	antiRTN1	1.25183	8.89015e-05	antiLCB1	1.30541	1.33178e-06	antiHTA1	-1.2193	1.36662e-07				antiVBA1	1.71675	3.84064e-09	antiDLD2	-1.38569	0.000318237	antiATP3	-2.07604
PHO89	2.49726	0.00542616	antiAAD6	2.52764	0.0369294				antiSPE1	2.10581	0.000165797	PAI3	1.74786	0.000190496	antiYLL053C	1.93423	0.0113853				antiYPR039W	-1.33858	9.1678e-05	antiYER163C	-1.01804	0.00126693	YNR070W	-1.01432	0.000746524	antiPET127	1.13866	9.00886e-05	antiYPR003C	1.66504	1.37793e-06	antiLSM7	-1.6274	1.39112e-07				antiCNB1	3.10012	4.03517e-09	antiRPL43A	-1.52581	0.000323803	antiESF2	-1.55338
antiSPC98	1.35339	0.00548993	CCC2	1.05227	0.0369912				antiPIN3	1.48792	0.000167656	AMA1	1.75161	0.000208693	antiILV5	-1.3539	0.0116171				EBP2	1.18812	9.5088e-05	antiFLR1	-1.30837	0.00127593	BNA1	-1.21338	0.000751427	antiYAP1	1.27195	0.000102464	antiRTN2	1.73137	1.43794e-06	SWD2	-1.04356	1.41685e-07				YEH1	-1.09261	4.16423e-09	antiNOP12	-2.02669	0.000324058	antiMOT2	1.13266
PES4	1.82517	0.00556459	EFT2	-1.18835	0.0370213				ECM4	1.09427	0.000168738	antiRCY1	1.70349	0.000219212	antiYLR356W	1.34835	0.0116248				antiRMD11	-1.19599	9.60651e-05	antiALF1	-1.19013	0.0013482	antiYBR219C	1.05744	0.000754081	antiYMR171C	1.62356	0.000105376	AVT3	1.11902	1.47772e-06	antiNUD1	1.55481	1.41693e-07				antiYGR250C	2.66355	4.36071e-09	antiPNS1	-1.1427	0.000324058	PDR11	-1.12123
PHM6	1.80987	0.00572959	antiYGL108C	-1.22843	0.0374064				antiGAL11	1.42876	0.000169687	YBR184W	1.02359	0.000225608	antiMCD4	1.01786	0.0117119				YEH1	-1.12163	9.84321e-05	YLR271W	1.1172	0.0013482	antiRPB7	1.38291	0.000760905	antiRPS16A	1.27324	0.000105376	antiTPC1	-1.35124	1.50869e-06	YCR090C	-1.13924	1.49844e-07				antiRAD9	2.31409	4.45037e-09	antiSUP35	-1.93754	0.000324058	antiROM2	-1.38927
antiRSM18	-2.34845	0.00589535	antiMNI2	-1.5985	0.0381022				antiLST4	3.83106	0.000171773	FIT3	-1.16254	0.000234837	YIL046W-A	1.06444	0.0120948				SSP1	1.15185	9.89695e-05	antiPUS6	-1.04459	0.0013482	FMP40	1.09977	0.000791263	antiUTP4	1.64753	0.000107573	antiCBF1	2.23801	1.53949e-06	antiHSP150	1.23416	1.54426e-07				antiPDC1	1.65896	4.63497e-09	antiYSP2	-1.91452	0.00032443	YNL162W-A	-1.6658
antiCEX1	1.55847	0.0059593	antiPDC1	-1.12859	0.0382519				FIT3	-1.15374	0.000176243	antiPIN3	1.50947	0.000244344	PAI3	1.19087	0.0123958				antiYCR051W	-1.13283	0.000100699	antiYER079W	-1.04861	0.00135401	antiMEC1	1.0942	0.000799042	antiAQR1	1.43099	0.000108227	antiPCL8	2.41904	1.55544e-06	ZRG8	1.12384	1.55386e-07				antiSTB4	2.52852	4.73243e-09	antiSGO1	-2.03396	0.000326802	antiTGL4	1.17388
antiYDR444W	1.42969	0.00597095	antiYLR036C	1.2711	0.0385573				antiATP3	1.0013	0.000179729	POL4	1.1936	0.000246993	antiTMA108	1.10021	0.0124905				antiNVJ1	-1.19229	0.000102353	antiFMP16	-1.17792	0.00140781	MAE1	1.31387	0.000830042	antiUBP2	1.04448	0.000111918	PEX32	-1.08616	1.55544e-06	antiSIP4	-1.24302	1.67262e-07				antiFAB1	2.41245	4.77459e-09	antiLCP5	-3.6317	0.000328219	antiUFD2	-1.00736
antiRPC11	-1.61235	0.00599938	antiYPT11	-1.08411	0.0390817				antiMDM32	1.29109	0.000186357	antiYNL181W	1.08927	0.000253772	antiNGR1	1.15884	0.0127901				YKL071W	1.35759	0.000102353	antiRIB3	-1.25306	0.00142375	antiGAL80	1.00171	0.000831886	antiMRI1	1.45642	0.000124335	YDR132C	-1.41827	1.56293e-06	antiUBA3	-1.27058	1.68108e-07				antiCFT2	2.55302	4.82751e-09	antiMRPL35	-1.19681	0.000334976	antiTHI73	-1.16476
antiSMP3	1.03117	0.00601679	antiCIN8	-1.20432	0.0391814				antiYLR356W	1.93246	0.000191915	antiMCK1	2.28158	0.000255573	antiYPR148C	3.39577	0.0137304				antiHST3	-1.33236	0.000104786	antiNNT1	1.14789	0.00146498	VPS25	-1.00623	0.000879279	antiEOS1	1.42425	0.000140283	antiALD2	-1.3599	1.60749e-06	antiYNL193W	-1.33091	1.77516e-07				antiHOR2	-1.75519	5.0327e-09	antiTPT1	-1.53741	0.00034162	antiMLC1	-1.62179
antiMSY1	-1.03877	0.00639312	YTP1	1.5945	0.0391955				GAL7_GAL10	1.10732	0.000194838	antiGPR1	1.11504	0.000256893	antiKOG1	1.55467	0.0141691				antiDDC1	-1.36646	0.000105482	antiBNA4	-1.32365	0.00149241	YER137C	-1.14609	0.000900596	antiSKP2	1.19395	0.000141369	YDR336W	-1.17446	1.65201e-06	APQ12	-1.08718	1.9617e-07				antiUTR2	2.77468	5.03544e-09	antiYDR266C	-1.55817	0.000341998	antiRPS26A	-1.51193
antiYNL024C-A	-2.06134	0.00639365	YKL050C	1.02919	0.0395157				antiPEX3	1.84372	0.000201458	antiARP7	-1.98742	0.000263588	antiCOS9	1.4021	0.0141732				CDC26	1.09444	0.00010709	antiTMA29	-1.2749	0.00151452	HOS1	-1.01122	0.000909398	antiSCL1	1.0133	0.000144636	antiADO1	1.45965	1.68148e-06	antiVPS13	2.20587	1.9617e-07				HOR2	1.09017	5.07162e-09	antiYML030W	-1.11451	0.000359061	YOR062C	1.42679
antiCOX7	-1.23522	0.0064223	antiMLP1	-1.31648	0.0404816				antiMAG2	1.4074	0.000202362	antiTMA108	1.59305	0.000267181	YMR118C	2.01319	0.0142312				antiYDL144C	-1.50501	0.000109431	antiNOP15	-1.02505	0.00151705	ERV46	1.10497	0.000921882	antiTMA17	-1.13999	0.000152816	YIL089W	-1.09298	1.69403e-06	antiYPR036W-A	1.58452	1.98789e-07				SLC1	-1.25878	5.21551e-09	antiCLB1	-1.85946	0.000363265	antiVAC7	-1.3387
YHR022C	-1.00444	0.00644984	antiAVT3	1.47408	0.0405567				antiAGP3	1.69372	0.000204785	antiLCB1	1.01174	0.000272335	YNL277W-A	1.24413	0.0144198				QCR6	1.42871	0.000110946	antiDBP8	-1.29727	0.00151705	antiYVC1	1.73497	0.000921882	antiUBP8	1.28371	0.000169809	antiALR2	1.69448	1.85627e-06	antiBOP2	-1.07183	2.05526e-07				TRI1	-1.34371	5.33675e-09	antiHRR25	-2.1556	0.000363265	antiMRPL11	-1.51898
antiPDR10	-1.04182	0.00657911	antiBRN1	-1.15268	0.0412981				antiPUT1	1.58725	0.000205611	antiRTT107	1.56341	0.000291736	antiSSY1	1.41575	0.0148248				COX17	1.01126	0.000114022	antiDIA3	-1.05604	0.00151717	antiYLR040C	-1.46742	0.000941196	antiSPS4	1.14582	0.000172606	antiYGL230C	-1.25271	1.87113e-06	ADH1	1.06699	2.05526e-07				antiYBL029C-A	-1.46035	5.34161e-09	antiGCV2	-1.98089	0.000375106	ERV46	1.03988
antiVAS1	-1.05523	0.0066448	RAD26	1.00233	0.0437337				antiSIN4	1.71117	0.000209011	SEO1	1.61238	0.000295206	antiEFT2	-2.92418	0.0151304				antiRVS167	-1.11448	0.000116062	antiFLC1	-1.00857	0.00156038	PHM6	-1.90333	0.000950619	antiTOK1	1.11791	0.000172606	antiCOG1	1.29682	1.9403e-06	antiYMR244C-A	-1.69376	2.06655e-07				antiMMM1	2.52051	5.48185e-09	antiMRPL27	-1.34686	0.000376554	antiMPD1	-1.9858
antiSTE3	1.43487	0.00676277	antiBRE5	-1.12492	0.0446594				antiPDS1	-1.14776	0.000210294	antiTUS1	1.24828	0.000297696	antiPEX3	1.23229	0.0152565				BNS1	1.07548	0.000121136	antiRNQ1	-1.50633	0.00159492	antiAGE1	1.3014	0.00100617	antiRSP5	1.44884	0.000172606	FMP40	1.35656	1.97254e-06	antiYGR093W	-1.22717	2.22047e-07				YNL108C	-1.13025	6.00066e-09	antiSAR1	-1.46485	0.000382268	BNA3	1.01907
antiYDR119W	1.03863	0.00684192	antiADE16	-1.09799	0.0446594				antiRTT107	1.60794	0.000218708	antiMMR1	1.51246	0.000302064	antiYML053C	1.04566	0.0154529				CWP1	-1.04305	0.000124555	antiMAG2	1.91983	0.00166974	antiPCC1	-1.51598	0.00101628	antiKIP3	1.02951	0.000173302	antiIMH1	2.14847	2.07033e-06	antiYCK3	1.72858	2.38551e-07				antiGCN1	2.10249	6.01517e-09	antiCCT8	-1.30491	0.000385017	antiRPL15B	-1.35534
antiGPD1	1.01562	0.00709356	VMA9	-1.00628	0.0447442				MBR1	1.15145	0.00022009	antiTRM9	1.99904	0.000314893	antiYIR042C	1.07202	0.0158176				antiYOL038C-A	-1.11835	0.000125688	antiMRPL8	-1.10081	0.00169822	SHM1	1.03465	0.00106023	antiPHS1	1.06053	0.00017395	antiGDH2	-1.12298	2.20136e-06	antiYER128W	-1.342	2.41174e-07				CDS1	-1.07231	6.20329e-09	antiBCK2	-2.13087	0.000385017	antiNUT2	-1.15807
TRS31	-1.43173	0.00736017	QNQ1	2.33502	0.0454276				antiPSK2	1.90351	0.000232694	antiYER187W	1.69209	0.000319722	antiDPB11	1.02029	0.0158506				antiHEK2	-1.07282	0.000125688	URA4	1.1323	0.00183189	antiQDR2	-1.68857	0.0011191	antiSKI2	1.05902	0.000179331	antiYEL025C	-1.13655	2.21467e-06	antiASI2	-1.23024	2.49453e-07				antiASI2	-1.29612	6.20367e-09	antiCET1	-1.50904	0.000404871	DLD1	1.03899
antiCRT10	1.2615	0.00760611	antiSEC61	1.76161	0.0456431				antiNGR1	1.72441	0.000232694	QCR9	1.2956	0.000329197	antiASP1	1.39014	0.0162125				antiTCO89	-1.37336	0.000125688	FLX1	-1.04163	0.00183189	antiVAM6	1.1723	0.00114166	antiECM14	1.16662	0.000181998	antiGIM5	-1.16422	2.23323e-06	antiRAX1	1.05874	2.49453e-07				YHB1	-1.18655	6.57595e-09	antiPFA4	-1.05983	0.000405869	antiPDR8	-1.27206
antiDST1	-1.05971	0.00782583	antiUTR4	-1.25769	0.0458098				antiCOX14	1.62045	0.000233513	ECM4	1.0809	0.000342252	antiIRC10	1.24728	0.0169844				antiMTH1	-1.58019	0.000132013	HSP104	1.10663	0.00183279	antiNUP82	-1.09023	0.00114229	antiCCW14	1.70651	0.000205846	antiSKG3	2.39202	2.2801e-06	antiMRPL11	-1.66049	2.61053e-07				antiMRS11	-1.22867	6.86916e-09	antiYOR052C	-1.12855	0.000406751	TPS2	1.13006
antiARR1	-1.50265	0.00793801	antiCIN5	-1.14484	0.0461371				antiSRY1	2.13232	0.000237247	antiRPS7A	1.33219	0.000359407	ARO10	1.2828	0.0175663				antiPDS1	-1.44131	0.00013618	antiSPT4	-1.42015	0.00184938	antiYIL067C	1.14531	0.00115097	antiBCK2	1.41768	0.000208621	SEN2	-1.52895	2.37461e-06	YJR008W	1.03565	2.64456e-07				DPM1	-1.08811	6.86916e-09	antiYGL036W	-1.55957	0.000413349	antiLSM7	-1.37281
antiYFR052C-A	-1.01211	0.00817253	antiPRS1	1.56686	0.046691				antiTOP3	1.00365	0.000251516	antiEDC1	1.33814	0.000365289	RPL4A	-1.11192	0.0176039				INH1	1.04975	0.000137472	antiYML030W	-1.16556	0.00196955	YCL056C	-1.14995	0.00125715	antiHDA3	1.25601	0.000210294	antiPEX2	1.27365	2.37492e-06	antiYDJ1	1.62627	2.73314e-07				antiINP53	1.98998	6.9705e-09	antiSPT15	-2.16476	0.000414198	antiBFA1	-1.04139
antiCIT2	1.01295	0.00819866	antiIES4	-1.38248	0.046691				antiNAM8	1.51912	0.000252149	antiPDC1	-1.15358	0.000366463	antiCHA1	1.70198	0.0178194				antiAPM2	-1.15782	0.000145303	antiSUV3	-1.38929	0.00197236	antiPSP2	1.46595	0.00125871	antiPEX5	1.3184	0.000211238	antiYCR061W	1.60727	2.51168e-06	antiDTD1	-1.62004	2.8825e-07				antiFKH2	2.51374	7.06056e-09	antiKIP1	-1.5844	0.000429164	CHO1	1.23953
antiVMA5	-1.36966	0.00850543	antiRSN1	-1.03096	0.0470069				antiYCR095W-A	3.93863	0.000260506	antiSNF1	1.22859	0.000369943	antiSPE1	1.37273	0.0179478				antiYHR182W	-1.14534	0.000145303	SIF2	1.13954	0.00201335	ERI1	-1.05903	0.00125871	antiDBF4	1.57326	0.000216839	antiPOX1	-1.37115	2.60912e-06	antiBRE1	-1.55006	2.98071e-07				antiYMR210W	-1.11873	7.37849e-09	antiDBP8	-1.25539	0.00043059	LPE10	1.10926
YJL038C	1.05327	0.00884597	antiYGR035C	-1.1788	0.0470069				antiGPI13	1.91652	0.000276902	antiMRPL6	1.32089	0.000369943	antiPET20	1.18078	0.017986				antiRSM25	-1.34561	0.000148078	antiISU2	-1.03605	0.00201335	antiYML030W	-1.28272	0.00127623	antiCRN1	1.12599	0.000217393	antiNGL2	1.46757	2.60912e-06	antiMRPL8	-1.22532	3.07874e-07				antiUTP7	1.6141	7.74097e-09	antiSSB2	-2.45423	0.000447629	antiTHP2	-1.43277
HSP12	1.4133	0.00915952	antiRAD24	-1.11814	0.0472532				antiCDC16	1.25006	0.000286698	antiTDH1	1.4669	0.0003944	MET17	7.99911	0.0180643				FYV7	1.08632	0.00015045	antiESF2	-1.12432	0.00201335	antiDIA3	-1.05017	0.00130205	antiYHL008C	1.31353	0.000225221	antiECM38	-1.06896	2.66655e-06	antiYLR099W-A	-1.3459	3.34461e-07				antiMUC1	1.59196	7.85225e-09	antiOPI1	-1.94041	0.000450487	antiYLR287C	-1.70495
antiLOT6	-1.08412	0.00916909	RIM4	1.28924	0.0484006				antiMIR1	1.27276	0.000299014	antiASK10	1.33979	0.000410673	antiSRY1	1.27158	0.018075				GFD1	1.1334	0.000151931	antiMSC1	-1.00726	0.00201335	antiYJR012C	-1.66269	0.0013243	antiAVT7	1.53924	0.000247359	antiMEC1	1.37541	2.67121e-06	antiSYM1	-1.2556	3.37547e-07				antiBUR6	1.18121	8.04518e-09	antiLSM1	-1.03353	0.000450487	antiMEX67	1.1447
antiURH1	1.01522	0.00952151	YLR149C	1.9023	0.049				GIP2	1.25613	0.000309726	antiDOA4	1.09485	0.000427738	antiENO2	-1.62015	0.0181759				ATP7	1.23514	0.000152176	antiYML6	-1.22928	0.00202182	CAT2	-1.30675	0.00134551	antiSEC6	1.01346	0.000247593	ARR3	-1.36833	2.67121e-06	antiSGS1	1.73729	3.4507e-07				antiRPO31	1.87824	8.79426e-09	antiRPL20B	-1.72569	0.000450487	YNR024W	-1.05724
antiPMD1	-1.75254	0.0098225	antiTPI1	-1.39746	0.0490723				antiSRL1	1.62172	0.00031528	antiRAD51	2.25308	0.000446388	YGL230C	1.14559	0.0181759				antiYLR426W	-1.30223	0.000156118	antiYGL196W	-1.00652	0.00202182	antiHHF1	-1.69983	0.00134551	antiRAD54	1.20264	0.000259491	YHR022C	-1.87572	2.71739e-06	antiFMP16	-1.35556	3.50703e-07				antiSOK2	1.27543	9.04005e-09	antiRPL14A	-2.16144	0.000456609	ERV2	1.29245
antiMGM1	-1.10155	0.00984214	antiJID1	-1.04716	0.0494171				antiVPS30	1.63072	0.000322127	antiRAD26	1.30044	0.000451299	PSY1_YKL075C	1.77917	0.0183696				antiSAY1	-1.03049	0.00015812	antiYNL208W	-1.2288	0.00202221	antiKRE11	1.06029	0.00136653	antiGAT1	1.04769	0.000275346	GPH1_YPR160W-A	1.44515	2.75362e-06	antiTRA1	1.23658	3.78593e-07				antiERG11	1.97435	9.10724e-09	antiREG1	-1.81527	0.000462714	YJL163C	1.36871
HEM4	-1.41737	0.00996436							antiSKP2	1.17531	0.000339672	GUP2	1.05542	0.000468082	antiFMP48	1.34291	0.0186817				antiGAP1	2.22667	0.000159929	SUR1	1.07018	0.0020225	antiFLO5	1.69461	0.00137994	antiUFO1	1.10692	0.000282755	antiUAF30	-1.18373	2.8102e-06	antiFUR4	1.28215	3.80876e-07				antiBDH1	-1.4424	9.29903e-09	antiMSC6	-1.01432	0.000466791	UBP11	1.44243
antiCUP9	-1.32456	0.0101814							SPG4	2.36119	0.000383579	antiMMM1	1.71326	0.000481712	ARO80	1.39561	0.0187652				antiRPH1	-1.10218	0.000161843	PRP5	1.05543	0.00205516	antiATG22	1.40367	0.00139315	antiHIR3	1.17459	0.000286115	CRG1	-1.31944	2.84861e-06	GPG1	1.47208	3.85753e-07				antiMRH1	1.55402	9.29903e-09	antiFLR1	-1.14934	0.000472577	HXT3	1.14854
YFR012W_YFR012W-A	1.04811	0.0101935							antiYGR151C	-1.24764	0.000406486	antiTRM2	1.53435	0.000492191	antiYEL048C	1.22741	0.0193759				antiTRM112	-1.29521	0.000162367	antiNOB1	-1.2865	0.00205516	MET28	-1.13621	0.00141542	antiPRE3	1.22206	0.000295546	YNL211C	-1.39327	2.86493e-06	YKL069W	-1.0283	3.89121e-07				antiUSO1	2.15922	9.34748e-09	antiHCA4	-2.40525	0.000475274	YJR054W	-1.00358
ARO10	1.39698	0.0104301							antiCDC46	2.04793	0.000409094	antiHED1	-1.08137	0.000501491	antiSPB4	2.8008	0.0195509				antiFMP41	-1.20076	0.000163437	antiSPR3	-1.16399	0.00232025	ACS1	-1.02877	0.00144611	antiFIG4	1.27981	0.000307696	antiJID1	-1.35869	2.96121e-06	YGR110W	1.8024	3.95325e-07				antiRIF2	-1.06956	9.65584e-09	antiHTS1	-1.78379	0.000477198	antiRKR1	-1.40291
antiYMR171C	1.23814	0.0105412							antiCCR4	1.54511	0.000413225	antiLST4	3.34088	0.000512663	antiCDC19	-2.67081	0.0199566				antiYGR126W	-1.19922	0.000168785	antiYGL059W	-1.12436	0.00235557	antiDPB11	1.61243	0.00145062	antiRRN3	1.22917	0.000312503	antiMNL1	1.10386	3.02651e-06	antiYBL029C-A	-1.44371	4.10164e-07				antiSGV1	1.516	9.68668e-09	antiCLU1	-1.82127	0.000477198	ATG15	1.09184
antiGIR2	-1.07555	0.0106907							antiTMA108	1.56646	0.00041865	antiCEM1	5.12643	0.000519344	antiBEM1	4.26096	0.0204218				antiSTB5	-1.17897	0.000169043	antiTYE7	-1.1845	0.00236969	antiPLB2	1.53292	0.00156338	antiPPT1	1.4693	0.000321759	antiYHR182W	1.13315	3.10739e-06	antiSCJ1	-1.55422	4.17737e-07				ALB1	-1.09072	9.80338e-09	antiDIG2	-1.04776	0.000477788	antiMET4	-1.66413
antiYNR061C	-1.49316	0.0110165							antiMET30	1.52529	0.000420765	antiARE1	1.17836	0.000584911	antiYER187W	1.09834	0.0207587				PDR11	-1.13367	0.000173467	BSC6	1.01337	0.00241199	antiPCF11	1.41405	0.00156894	antiYDR444W	1.71391	0.000324767	antiSKP2	1.45098	3.25252e-06	antiYKL133C	-1.85102	4.17737e-07				antiRIM15	1.64537	9.80338e-09	antiMTR10	-1.93533	0.000478936	antiOPI1	1.79435
antiNGR1	1.19819	0.012011							antiUBP7	1.05303	0.000431446	antiYGL159W	1.5237	0.000591359	SPG4	1.65085	0.0215613				antiLSM8	-1.11631	0.000176682	antiTIP1	1.32541	0.00242848	antiJEN1	-1.00441	0.00163189	antiPEP8	1.00025	0.000328035	antiIPP1	-1.17347	3.42808e-06	YCL042W_GLK1	2.43764	4.26291e-07				antiYHR087W	-1.3376	9.8179e-09	antiACS2	-1.91376	0.000478936	antiYMC2	1.33848
antiYBL107C	-1.39563	0.0122413							antiFAF1	1.22969	0.000433928	antiNAM8	1.48616	0.000614994	antiCLG1	1.18974	0.0218905				antiYGR251W	-1.11767	0.000181563	antiACO1	1.29814	0.00246912	antiFEN2	1.46961	0.00168153	antiMGR1	1.09783	0.000349269	AML1	-1.16388	3.42808e-06	YJL160C	-1.14213	4.74371e-07				antiIST2	2.64919	9.89469e-09	antiAQR1	-2.02404	0.000482893	antiTMA22	-1.30632
AQY1	1.01583	0.0123169							antiKTR6	2.13738	0.000438236	antiRSM10	1.9519	0.00061799	antiGIP1	1.36426	0.0229166				LIN1	1.26329	0.000183109	RPS29A	1.01545	0.00249502	antiYPR003C	1.25112	0.00172312	antiUBA2	1.20698	0.000352374	YHR022C-A	-1.12611	3.56332e-06	NCA3	1.023	4.8e-07				TMA10	2.60344	9.89664e-09	antiMAK11	-1.68919	0.000485412	antiARO2	-1.00608
antiSEC65	-1.65498	0.0126595							antiNAT4	1.21026	0.000446487	ZIP2	1.04633	0.000628005	antiPOB3	-2.347	0.0235701				antiNGL3	1.28112	0.000183911	antiPRP21	-1.2669	0.00250145	DSK2	1.00965	0.00176205	antiYDL233W	1.38694	0.000352374	antiYER156C	-1.01889	3.57124e-06	antiALD3	-1.32212	4.97742e-07				REI1	-1.00624	9.90964e-09	SEN2	-1.19971	0.00048877	YMR122W-A	-1.05517
antiYLR049C	-1.0198	0.0126769							antiMET10	1.63826	0.000468569	antiCLN1	3.8691	0.000635696	antiDFM1	1.12992	0.0240539				YLR168C	1.23003	0.00019544	antiYKL100C	1.30157	0.00250145	antiYER140W	1.18966	0.00182808	antiMDS3	1.11366	0.000355225	antiPGM1	1.02419	3.64717e-06	PHO81	1.2924	5.03508e-07				antiIRA2	1.75574	1.04632e-08	antiGLN4	-1.95604	0.000494422	antiNUP57	-1.20762
HXT1	-1.22414	0.012895							antiYGL082W	1.35506	0.000473585	antiRPN3	1.44974	0.000648182	antiMMP1	1.19626	0.0243188				antiGAD1	2.11565	0.00019544	antiGRX3	-1.04935	0.00251159	antiSAP190	-1.09562	0.0018558	antiFMP26	1.11087	0.000355661	antiSTP1	2.26449	3.6986e-06	antiDAP2	-1.01753	5.11887e-07				antiSWI1	2.68027	1.20897e-08	antiIGO1	-2.57873	0.000494571	antiVTC1	-1.06881
antiSYT1	-1.03446	0.0134848							antiYDR387C	1.47109	0.000483515	antiGGA2	1.17885	0.00066344	antiNAB3	-1.12044	0.025205				antiMHR1	-1.34719	0.000197684	HSP30	-1.20316	0.00253068	antiJID1	-1.02209	0.00189594	antiMSS116	1.81541	0.000373553	antiBOR1	1.73265	3.6986e-06	antiYHR087W	-1.15791	5.56324e-07				DCS2	1.78123	1.22039e-08	antiSPC29	-1.45513	0.000495694	CYB2	1.34749
antiPIG1	1.48858	0.0141252							HSP26	1.1699	0.000514256	antiPEX6	1.10488	0.000664545	antiREC8	1.19927	0.025357				antiNPA3	-1.50031	0.000207843	antiFAP7	-1.07502	0.00258421	GPH1_YPR160W-A	1.08251	0.00195009	antiDPB11	1.44895	0.000376134	antiOPT2	-1.08492	3.74158e-06	antiLYS2	1.73448	5.6e-07				NUS1	-1.06185	1.2718e-08	antiDNF3	-1.26308	0.000498512	antiMEI4	-1.01231
antiDAL1	1.16556	0.0143703							antiTFB4	1.15539	0.000514256	antiPEX3	1.71508	0.000667144	antiRPD3	1.34992	0.0262189				antiDFG5	-1.16644	0.000207843	antiDFG5	-1.20345	0.00266251	antiMDL1	1.56097	0.00211215	antiDFG16	1.47056	0.000400514	QNQ1	1.9644	3.90963e-06	antiCHA1	2.90593	5.79344e-07				POX1	1.83366	1.27188e-08	antiADE2	-2.49148	0.000503355	antiGYP8	1.55541
antiYGL196W	-1.06795	0.0146426							GPG1	1.07555	0.000524128	antiSVP26	1.45798	0.000673792	antiCCR4	1.0441	0.026533				antiUBP14	-1.23825	0.000214237	antiVMA22	-1.00587	0.00266962	antiADD37	-1.08194	0.00213648	antiREG1	1.24898	0.000401984	antiYNG1	-1.35327	3.9258e-06	antiYLR404W	-1.21137	6.18149e-07				YOR338W	1.27007	1.42278e-08	antiPTR2	-2.44743	0.000503355	MRK1	1.53863
YNR062C	1.23112	0.0156727							SSP2	2.79053	0.000530769	antiTIM44	1.00558	0.000681777	antiFAR11	2.77555	0.0268717				antiYOR131C	-1.1424	0.000214734	antiSEN1	1.88823	0.00267743	antiMLF3	1.04498	0.00217471	antiPKC1	1.69353	0.000404858	antiCYB5	-1.74679	3.95596e-06	antiYNL024C	-1.18722	6.4708e-07				antiRPP1	-1.44808	1.45847e-08	antiSWH1	-2.59802	0.000505147	antiTRX1	-1.41233
antiGLO4	-1.30379	0.0157984							antiYMR291W	1.29211	0.000531678	antiPHB1	1.76753	0.000684254	antiYOR203W	-1.0695	0.027315				FMC1	1.03729	0.000214734	YJL185C	-1.01029	0.00270881	antiCAX4	-1.2664	0.00220878	antiYDR239C	1.0405	0.000412844	ERV15	-1.09559	4.21966e-06	antiYGL230C	-1.45772	6.54071e-07				antiARN1	1.79017	1.46485e-08	antiCCT7	-2.22794	0.000507741	YKR041W	1.1675
antiRPL31A	-1.4944	0.0158355							QCR9	1.24782	0.000562694	antiASE1	1.46529	0.000687962	antiYER067W	1.7224	0.0273964				antiYPR174C	-1.15512	0.000216538	antiWHI5	-1.11492	0.00277708	antiDMC1	-1.66102	0.00224886	antiCDC46	1.67282	0.000424002	antiYMR258C	2.10111	4.39792e-06	antiYML030W	-1.88331	6.69987e-07				RIB4	-1.06064	1.51963e-08	antiRPS18A	-1.31847	0.000523115	antiYJR011C	-1.2301
YHL012W	1.15603	0.0159544							antiYME2	1.77937	0.00056638	antiYPL034W	1.55387	0.000722888	antiPSK2	1.2036	0.0275775				antiYAR1	-1.17842	0.000222726	antiMDJ1	-1.34223	0.00285349	antiSCM4	-1.31168	0.00226513	antiRPL12B	1.52049	0.000429773	antiAPQ12	-1.97424	4.47756e-06	ABM1	-1.14337	7.34892e-07				TRM10	-1.2234	1.6542e-08	antiYGL057C	-1.41934	0.000525638	antiMRPL24	-1.89959
antiCSI1	-1.36305	0.016004							antiMSC7	1.20041	0.000579574	antiSRY1	1.77193	0.000796244	antiRPL8A	-1.67042	0.0278507				antiVMA8	-1.27979	0.000228954	antiPSF3	1.01173	0.00288579	ARO9	1.25569	0.00234233	antiPUB1	1.19235	0.000433932	NRG2	-1.13404	4.49412e-06	IDP2	1.318	7.54863e-07				antiLRG1	2.58452	1.72048e-08	antiYOR342C	-1.39786	0.000538949	COX15	1.02244
antiITR1	1.07855	0.0163042							antiGPI8	1.26921	0.000581935	antiSKP2	1.15997	0.000832125	SQS1	1.28659	0.0284764				antiMRPL8	-1.2739	0.000229331	antiNVJ1	-1.25574	0.00295392	YFL032W_HAC1	1.01394	0.00234233	antiTPS3	1.71076	0.000438955	antiRBL2	-1.70787	4.54968e-06	SDS24	1.03249	7.59676e-07				antiBUD20	-1.48144	1.72349e-08	antiUTP11	-1.18151	0.000545694	antiNPC2	-1.20326
antiNTO1	1.21577	0.0164579							antiMAK10	-1.11071	0.000594451	antiAIP1	1.00627	0.000832144	antiGPI13	1.23294	0.0285513				antiYMR003W	-1.23586	0.000231572	antiAPE3	1.58199	0.00295422	FRE7	1.0044	0.00242484	antiYER140W	1.193	0.000441635	HTB1	-1.11581	4.70248e-06	QNQ1	2.0375	8.14699e-07				antiTRA1	1.51424	1.73411e-08	antiNPL6	-2.0978	0.000551148	antiSLN1	-1.06585
antiMDH1	-1.32801	0.0166773							DAL80	1.95076	0.000612929	antiSWI3	1.01832	0.000840497	antiPGA2	1.04197	0.0294056				antiCTI6	-1.10134	0.000237439	antiPAC10	-1.26844	0.00299446	antiTAH1	-1.25689	0.00248292	antiVPS45	1.17927	0.000460216	antiMET8	1.68628	4.71296e-06	antiFSH3	-1.52705	8.15263e-07				antiYDR185C	-1.2339	1.78399e-08	antiNUP159	-1.26203	0.00055531	TIR1	4.90681
antiCCL1	-1.32968	0.0168726							antiVRP1	1.19658	0.000626951	antiMCH1	1.23505	0.000845862	DAL1	1.20061	0.0297265				antiSPT20	-1.13598	0.00023882	DAL3	-1.26838	0.0031338	antiGPM3	1.43074	0.00254598	antiNHP2	1.36657	0.00046804	antiMTL1	2.33882	4.74523e-06	antiPEX14	-1.47313	8.43586e-07				antiSEC9	1.71597	1.84298e-08	antiMSC1	-1.03955	0.00055612	MSC1	1.18562
antiFMP39	-1.53926	0.017149							antiFUN19	1.14073	0.000645155	antiHSD1	1.14781	0.000852953	antiPCA1	1.3109	0.0299961				antiIRC8	-1.20248	0.000239127	antiMTO1	-1.28726	0.00317501	ADE17	1.10168	0.00255673	antiPMT3	1.20302	0.000486212	antiYOR097C	-1.46319	4.77626e-06	antiMEC3	-1.32197	9.27135e-07				AGA2	-1.30177	1.84711e-08	antiBMH1	-1.10808	0.000562013	STF2	1.54565
antiSSO2	-1.25073	0.0172631							YML131W	1.03154	0.000647567	antiPPZ1	1.73007	0.000876386	antiYME2	1.16978	0.0307325				AAC3	-1.24731	0.000240447	antiSPO7	-1.12861	0.00325593	TGL2	-1.28255	0.00257886	antiYLR108C	1.42028	0.000508833	antiYHL008C	1.72803	4.81113e-06	PHO89	4.12996	9.33139e-07				antiYDR018C	-1.16364	1.85468e-08	antiMAK21	-2.17823	0.000562013	antiSOK2	1.0787
antiATG21	-1.23163	0.0174188							antiRPS24B	1.225	0.000652346	antiYMR185W	3.8883	0.000883183	antiPPZ1	1.17429	0.0316814				antiTES1	-1.05364	0.000246734	TOM70	1.02933	0.00328327	antiCLN1	1.14131	0.0026217	antiAKR1	1.4386	0.000520426	antiBMH2	1.14888	4.83397e-06	EGT2	1.01582	9.42618e-07				antiUBX2	-1.01269	1.89326e-08	antiKAR4	-1.08967	0.000582315	antiYIL083C	-1.42397
antiARG8	-1.18616	0.0177453							antiBEM2	1.0067	0.000681719	antiNOC4	1.38705	0.000891465	antiSUR1	2.8659	0.0323782				antiHXT2	2.02201	0.000249849	antiIPI1	-1.63027	0.00342455	antiPET9	1.18344	0.00262865	antiFLO5	1.68645	0.000520426	antiSEC72	-1.33084	4.83632e-06	DDR2	1.62963	9.80572e-07				antiSPR6	-1.47724	1.91413e-08	antiPMS1	-1.03194	0.000583152	PRX1	1.12028
antiAHC2	-1.10042	0.0179122							antiEMG1	1.1661	0.000706932	antiKTR6	2.08799	0.000914341	antiRAD51	1.38739	0.0325737				SEO1	1.50784	0.000252736	antiYPR174C	-1.14555	0.00342455	antiAPQ12	-1.42938	0.00273049	antiMRPL10	1.2376	0.0005248	GOR1	1.07478	5.03346e-06	antiGVP36	-1.59586	9.86435e-07				YGR283C	-1.11067	1.97831e-08	antiYOR238W	-1.28811	0.000583152	AMS1	1.13837
antiMRS2	-1.02696	0.0182697							antiBSP1	1.12239	0.000719079	YML131W	1.01873	0.000926482	antiYBR085C-A	1.12839	0.0331422				antiCUS2	-1.25403	0.000259512	antiEMP24	-1.69436	0.00346881	antiYBR224W	1.20636	0.00279474	YHR177W	1.30021	0.000531015	antiCOG3	1.80355	5.1401e-06	antiYLR042C	-1.10036	1.01749e-06				RRP8	-1.10968	2.06732e-08	antiPET112	-1.07416	0.000589902	antiYOL038C-A	-1.08761
antiBRE5	-1.62184	0.018458							antiCLG1	1.68455	0.000721135	antiHOS2	1.127	0.00094074	antiTPS3	1.12037	0.0338129				antiBUD31	-1.67986	0.000260264	antiFAT1	1.17261	0.00350702	YGR110W	1.30256	0.00285898	antiSYP1	1.08867	0.000536874	REV7	-1.18818	5.17578e-06	antiYNL254C	-1.03877	1.03279e-06				antiLTV1	2.31777	2.0966e-08	antiYJR124C	-1.0418	0.000591521	YHR210C	1.14943
YNL195C	1.14784	0.01925							antiRPL22A	1.22487	0.000728756	REC8	1.96118	0.000955926	antiRIP1	1.1982	0.0347836				OYE3	1.47065	0.000263917	antiYPT32	-1.08121	0.0036222	antiMRN1	1.29277	0.00285898	antiRAD2	1.028	0.000538857	antiBUD31	-1.20876	5.21915e-06	YLR364W	-1.04008	1.15912e-06				antiYHR113W	1.12659	2.11695e-08	antiSWR1	-1.1543	0.000591521	antiMMF1	-1.22334
antiMRP51	-1.00823	0.01925							antiTUS1	1.17908	0.00073147	antiMAK10	-1.07726	0.000981854	antiCOP1	3.74461	0.035614				antiERV1	-1.13951	0.000267754	antiRKM1	-1.05096	0.00373794	YHL044W	-1.56934	0.00293613	antiLDB7	1.08504	0.000543809	antiARO2	-1.49375	5.51458e-06	antiTIM50	-1.14538	1.17955e-06				PKR1	-1.29472	2.19573e-08	antiPMT2	-3.00039	0.000592608	GGA1	1.06183
FLX1	-1.1591	0.0196914							YLR149C	1.21909	0.00075929	antiMMP1	2.00021	0.000985876	antiKTR6	1.44486	0.035614				antiSTE23	-1.17534	0.000275865	antiFMT1	-1.09573	0.0038921	antiFYV4	-1.16368	0.00294801	antiMEC1	1.01906	0.00058233	antiFLO10	1.72052	5.57007e-06	antiDPB3	-1.34957	1.20746e-06				antiMSH1	1.53249	2.24003e-08	antiBUD6	-1.95444	0.000633849	antiTFA1	-1.1405
antiDUS1	-1.50281	0.0196941							antiASF1	-1.11602	0.000761828	antiMGR1	1.01742	0.000994886	antiRPL3	-1.6931	0.0356654				antiUAF30	-1.08844	0.000278102	antiSFG1	1.17634	0.00444385	antiNGL2	1.10458	0.00296053	antiGPI8	1.20553	0.000594096	antiRBD2	-1.09723	6.02961e-06	antiSRP102	-1.65521	1.22051e-06				ECM19	-1.34585	2.31461e-08	antiCOX10	-2.50529	0.000641741	antiYDR026C	-1.11719
antiNST1	1.01392	0.0202872							antiTRM2	1.49495	0.000772726	antiFUN19	1.11663	0.00103294	YNR062C	1.01686	0.0365123				antiPUS6	-1.15522	0.000280372	antiSTT3	-1.23902	0.00447269	MVB12	-1.08798	0.00308984	antiYBT1	1.28044	0.000632481	antiREV3	1.42088	6.19379e-06	antiYET1	-1.67228	1.25069e-06				antiCYC3	1.07583	2.33163e-08	antiCDC21	-1.2764	0.000646272	STR3	1.6904
antiYIP1	-1.06978	0.0214301							antiCCA1	1.41592	0.000784445	SPO22	1.08087	0.00103627	antiTBF1	1.00778	0.0366949				antiMTR10	1.37364	0.000284303	antiYNL144C	-1.04418	0.00453171	antiERG10	1.03869	0.0031286	antiKRE33	1.40051	0.000632934	YCL047C	-1.08541	6.57537e-06	antiADI1	-1.07021	1.25569e-06				THI2	1.18501	2.7324e-08	antiRNH70	-1.04686	0.000652385	YDL156W	1.06383
antiPRP3	-1.04536	0.0215137							antiUTP9	1.44096	0.000788022	antiYOR338W	1.22889	0.00104024	TMA10	1.13494	0.0368599				antiVPS60	-1.3585	0.000285254	antiIES2	-1.44688	0.00454261	PGU1	1.327	0.0031613	antiTAF9	1.34705	0.000641781	TEX1	-1.104	6.60659e-06	antiHAL1	1.41149	1.27501e-06				antiMYO4	1.66342	2.84478e-08	antiUBA1	-1.12787	0.000652385	antiGEA1	-1.47097
DIT1	1.02888	0.0218283							antiVPS3	1.24341	0.000832029	antiDFM1	1.60856	0.00104575	GRE1	1.41384	0.0368927				SPN1	1.0079	0.000301902	antiYPR011C	-1.0508	0.00455723	antiHAA1	1.13161	0.00323703	antiYOR246C	1.21281	0.000643722	antiYHR022C-A	-1.37856	6.68988e-06	antiYAL046C	-1.83439	1.28182e-06				ADR1	1.48292	2.97981e-08	antiYGR174W-A	-1.21578	0.000656344	antiYGR093W	-1.1461
antiMCM22	-1.23715	0.0225233							antiDBP8	-1.03555	0.00083327	antiROD1	1.08777	0.00106402	antiTGL1	1.09525	0.0381684				HSP150	1.21742	0.000301994	antiCOQ4	-1.12718	0.00464442	antiLIA1	1.01579	0.00346249	antiTSR1	1.23321	0.00065087	antiRSF2	1.25721	6.74683e-06	CAT8	1.57735	1.28822e-06				LSM3	-1.04412	3.01802e-08	antiCPT1	-1.13956	0.000656344	antiMRP49	1.90821
YCR015C	-1.26873	0.0227077							GPH1_YPR160W-A	1.01255	0.00083327	DMC1	2.13319	0.00107403	antiPHB1	1.14617	0.0385057				antiMIF2	-1.07189	0.000308331	antiYGR017W	-1.15208	0.00488319	antiPDE2	1.71714	0.00350002	antiRPL30	1.05781	0.00065087	YLR040C	-1.44604	7.44213e-06	antiCPR6	-1.49922	1.28822e-06				antiFRE6	2.02366	3.06753e-08	antiRAD16	-1.45229	0.000662645	antiYJR124C	-1.12082
[truncated: 1,566 more rows]
[truncated: 19 more columns]

## Sheet: Sheet2
baseMean	log2FoldChange	lfcSE	stat	pvalue	padj
[truncated: 221 more rows]
