# Supplementary material for: Transcription elongation is finely tuned by dozens of regulatory factors
Source: eLife. 2022 May 16;11:e78944. doi: 10.7554/eLife.78944 (PMC9154744; doi:10.7554/eLife.78944)
Supplement: Supplementary file 3. — This table lists all GO terms that were significantly enriched in at least one deletion strain. For each GO term, if it was found to be significant in a given deletion strain, the fold enrichment and adjusted p-value (in parentheses) are listed. This table is separated into three sheets: those GO terms derived from either significantly up- or downregulated genes (purple), only significantly downregulated genes (red), and only significantly upregulated genes (blue). [file elife-78944-supp3.xlsx]

## Sheet: Table Legend
Supplemental File 3 | Differentially transcribed genes are enriched for GO terms.
This table lists all GO terms that were significantly enriched in at least one deletion strain. For each GO term, if it was found to be significant in a given deletion strain, the fold enrichment and adjusted p-value (in parentheses) are listed. This table is separated into three sheets: those GO terms derived from either significantly up- or down-regulated genes (purple), only significantly down…

## Sheet: All Diff. Transcribed Genes
Table S3. Differentially transcribed genes are enriched for GO terms.
term	bre1	bur2	bye1	cac1	cac2	cac3	cbc1	ccr4	cdc39	cdc73	chd1	ctr9	dhh1	dst1	eaf1	elf1	gcn5	hda1	hpc2	htz1	ino80	isw1	isw2	leo1	nap1	npl3	paf1	rad6	rco1	rpb4	rph1	rsc30	rtf1	rtt103	set2	set3	spt4	swr1	ubp8	vps15	vps34
'de novo' protein folding	NA	NA	NA	NA	NA	NA	NA	NA	2.6 (0.03915)	NA	NA	NA	NA	NA	NA	NA	NA	NA	NA	NA	NA	NA	NA	NA	NA	NA	NA	NA	NA	NA	NA	NA	NA	NA	NA	NA	NA	NA	NA	NA	NA
(D)-2-hydroxyglutarate-pyruvate transhydrogenase activity	NA	NA	NA	NA	NA	NA	25 (0.037975)	NA	NA	NA	NA	NA	NA	NA	NA	NA	NA	NA	NA	NA	NA	NA	NA	NA	NA	NA	NA	NA	NA	NA	NA	NA	NA	NA	NA	NA	NA	NA	NA	NA	NA
1,4-alpha-glucan branching enzyme activity	NA	NA	NA	NA	NA	NA	25 (0.027778)	NA	NA	NA	NA	NA	6.7 (0.041667)	NA	NA	NA	NA	NA	NA	NA	NA	NA	50 (0.013889)	NA	NA	NA	NA	NA	NA	NA	NA	NA	NA	NA	NA	NA	NA	NA	NA	NA	NA
1,4-alpha-glucan branching enzyme activity (using a glucosylated glycogenin as primer for glycogen synthesis)	NA	NA	NA	NA	NA	NA	25 (0.027778)	NA	NA	NA	NA	NA	6.7 (0.041667)	NA	NA	NA	NA	NA	NA	NA	NA	NA	50 (0.013889)	NA	NA	NA	NA	NA	NA	NA	NA	NA	NA	NA	NA	NA	NA	NA	NA	NA	NA
2-aminoadipate transaminase activity	NA	NA	NA	NA	NA	NA	NA	NA	NA	NA	NA	NA	NA	NA	NA	NA	7.7 (0.012987)	NA	NA	NA	NA	NA	NA	NA	NA	NA	NA	NA	NA	NA	NA	NA	NA	NA	NA	NA	NA	NA	NA	NA	NA
2-hydroxy-3-keto-5-methylthiopentenyl-1-phosphate phosphatase activity	NA	NA	NA	NA	NA	NA	NA	NA	NA	NA	NA	NA	NA	NA	NA	NA	NA	NA	NA	NA	NA	NA	NA	NA	NA	NA	NA	NA	NA	NA	NA	NA	NA	NA	NA	NA	NA	12.5 (0.014085)	NA	NA	NA
2-methylcitrate dehydratase activity	NA	NA	NA	NA	NA	NA	NA	NA	NA	NA	NA	NA	NA	NA	NA	NA	NA	NA	NA	NA	NA	NA	NA	NA	NA	NA	NA	NA	NA	NA	NA	NA	NA	NA	NA	NA	NA	NA	5.9 (0.037736)	NA	NA
3-isopropylmalate dehydratase complex	NA	NA	NA	NA	NA	NA	NA	NA	16.7 (0.029412)	NA	NA	9.1 (0.04902)	NA	NA	NA	NA	NA	NA	NA	NA	NA	NA	NA	NA	NA	NA	NA	NA	NA	NA	NA	NA	NA	NA	NA	NA	NA	NA	NA	NA	10 (0.04902)
3-isopropylmalate dehydrogenase activity	NA	NA	NA	11.1 (0.040541)	NA	NA	NA	NA	NA	NA	NA	NA	NA	NA	NA	NA	NA	NA	NA	NA	NA	NA	NA	NA	NA	NA	NA	NA	9.1 (0.040541)	NA	NA	NA	NA	NA	NA	NA	NA	NA	NA	NA	NA
4-hydroxyphenylpyruvate decarboxylase activity	20 (0.043478)	NA	NA	NA	NA	20 (0.043478)	NA	12.5 (0.043478)	NA	NA	NA	NA	NA	NA	NA	NA	NA	NA	NA	NA	NA	NA	NA	NA	Inf (0.043478)	16.7 (0.043478)	NA	NA	NA	NA	Inf (0.043478)	NA	20 (0.043478)	NA	NA	NA	NA	NA	NA	NA	NA
5-methyltetrahydropteroyltri-L-glutamate-dependent methyltransferase activity	NA	NA	NA	NA	NA	NA	NA	NA	16.7 (0.020408)	NA	NA	9.1 (0.040816)	NA	NA	NA	NA	11.1 (0.040816)	NA	NA	NA	NA	NA	NA	NA	NA	NA	NA	NA	NA	NA	NA	NA	NA	NA	NA	NA	NA	NA	NA	NA	10 (0.020408)
6-phosphogluconolactonase activity	NA	NA	NA	NA	NA	NA	NA	NA	NA	NA	NA	NA	NA	NA	NA	NA	NA	NA	NA	NA	NA	NA	NA	NA	NA	NA	NA	NA	NA	2.6 (0.047778)	NA	NA	NA	NA	NA	NA	NA	NA	NA	NA	NA
ADP binding	NA	NA	NA	NA	NA	NA	NA	NA	NA	NA	NA	NA	NA	NA	NA	NA	NA	NA	NA	NA	NA	NA	NA	NA	NA	NA	NA	NA	NA	3.5 (0.040082)	NA	NA	NA	NA	NA	NA	NA	NA	NA	NA	NA
ADP transport	NA	NA	NA	NA	NA	NA	NA	NA	NA	NA	NA	NA	NA	NA	NA	NA	NA	NA	NA	NA	NA	NA	NA	NA	NA	NA	NA	NA	NA	3 (0.023908)	NA	NA	NA	NA	NA	NA	NA	NA	NA	NA	NA
ADP-ribose diphosphatase activity	NA	NA	NA	NA	NA	NA	NA	NA	NA	NA	NA	NA	NA	NA	NA	NA	NA	NA	NA	NA	7.1 (0.044355)	NA	NA	NA	NA	NA	NA	NA	NA	NA	NA	NA	NA	NA	NA	NA	NA	NA	NA	NA	NA
ATP metabolic process	NA	NA	NA	NA	NA	NA	2.5 (0.002551)	2.1 (0)	NA	NA	NA	NA	NA	NA	NA	NA	2.1 (2.5e-05)	NA	NA	NA	NA	NA	NA	NA	NA	NA	NA	NA	NA	2.5 (0)	NA	NA	NA	NA	NA	NA	NA	NA	NA	NA	NA
ATP-dependent activity, acting on RNA	NA	NA	NA	NA	NA	NA	NA	NA	2.9 (0.005994)	NA	NA	NA	NA	NA	NA	NA	NA	NA	NA	NA	NA	NA	NA	NA	NA	NA	NA	NA	NA	NA	NA	NA	NA	NA	NA	NA	NA	NA	NA	NA	NA
ATPase binding	NA	NA	NA	NA	NA	NA	NA	NA	NA	NA	NA	NA	NA	NA	NA	NA	NA	NA	NA	10 (0.047801)	NA	NA	NA	NA	NA	5.3 (0.035997)	NA	NA	NA	NA	NA	NA	NA	NA	NA	NA	NA	NA	NA	NA	NA
BLOC complex	NA	NA	NA	NA	NA	NA	NA	NA	NA	NA	NA	NA	NA	NA	NA	NA	NA	NA	NA	NA	NA	NA	NA	NA	NA	NA	NA	NA	NA	NA	NA	3.3 (0.039297)	NA	NA	NA	NA	NA	NA	NA	NA	NA
CAF-1 complex	NA	NA	NA	NA	4 (0.044025)	7.1 (0.036779)	NA	NA	NA	NA	NA	5.9 (0.002079)	NA	NA	NA	NA	NA	NA	NA	NA	NA	NA	NA	NA	NA	NA	NA	NA	NA	NA	NA	NA	NA	NA	NA	NA	NA	NA	NA	NA	NA
CDP-diacylglycerol metabolic process	NA	NA	NA	NA	NA	4.2 (0.040984)	NA	NA	NA	NA	NA	NA	NA	NA	NA	NA	NA	NA	NA	NA	NA	NA	NA	NA	NA	NA	NA	NA	NA	NA	NA	NA	NA	NA	NA	NA	NA	NA	NA	NA	NA
CENP-A containing nucleosome binding	NA	25 (0.04)	33.3 (0.04)	NA	NA	NA	NA	NA	NA	NA	NA	NA	NA	NA	NA	7.1 (0.04)	NA	NA	NA	NA	7.1 (0.04)	NA	NA	NA	NA	NA	NA	7.1 (0.04)	NA	NA	NA	NA	NA	20 (0.04)	NA	NA	16.7 (0.04)	NA	NA	NA	NA
COP9 signalosome	NA	NA	NA	NA	NA	NA	NA	NA	NA	NA	NA	NA	NA	NA	NA	NA	NA	NA	NA	4.2 (0.036266)	NA	NA	NA	NA	NA	NA	NA	NA	NA	NA	NA	NA	NA	NA	NA	NA	NA	NA	NA	NA	NA
Cul4-RING E3 ubiquitin ligase complex	NA	NA	NA	NA	NA	NA	NA	NA	NA	NA	NA	NA	NA	NA	NA	NA	NA	NA	NA	NA	NA	NA	NA	NA	NA	NA	NA	7.1 (0.046512)	NA	NA	NA	NA	NA	NA	NA	NA	NA	NA	NA	NA	NA
Cvt complex	4.8 (0.029215)	NA	NA	NA	5.9 (0.001341)	NA	6.7 (0.031838)	NA	NA	NA	NA	NA	4.9 (9.4e-05)	NA	2.2 (0.009674)	NA	5.7 (0.003871)	NA	NA	7.1 (0.044877)	NA	5.6 (0.018666)	NA	20 (0.008032)	NA	NA	6.1 (0.000185)	5.3 (0.000511)	2.2 (0.04228)	3.9 (0.004234)	NA	NA	5.3 (0.010699)	NA	NA	NA	NA	NA	NA	NA	7.3 (6.5e-05)
Cvt vesicle	NA	NA	NA	NA	NA	NA	NA	NA	NA	NA	NA	NA	NA	NA	NA	NA	NA	NA	NA	NA	NA	NA	NA	NA	NA	NA	NA	7.1 (0.04947)	NA	NA	NA	NA	NA	NA	NA	NA	NA	NA	NA	NA	10 (0.04947)
D-loop DNA binding	NA	NA	NA	NA	NA	NA	NA	NA	NA	NA	NA	NA	NA	NA	NA	NA	NA	NA	NA	28.6 (0.003623)	NA	NA	NA	NA	NA	NA	NA	NA	NA	NA	NA	NA	NA	NA	NA	NA	NA	NA	NA	NA	NA
DNA dephosphorylation	NA	NA	NA	NA	NA	NA	NA	NA	NA	NA	NA	NA	NA	NA	NA	NA	NA	NA	NA	NA	NA	NA	NA	NA	NA	NA	NA	7.1 (0.05)	NA	NA	NA	NA	NA	NA	NA	NA	NA	NA	NA	NA	NA
DNA packaging complex	NA	NA	NA	2.1 (0.002501)	NA	NA	NA	NA	NA	3.1 (0.002927)	NA	3.3 (2e-06)	NA	NA	NA	NA	NA	NA	7.7 (0.015822)	NA	NA	NA	NA	NA	NA	NA	3.6 (1e-06)	3.5 (0)	NA	NA	NA	NA	NA	NA	NA	NA	NA	NA	NA	NA	NA
DNA repair complex assembly	NA	NA	NA	NA	2.6 (0.008288)	NA	NA	NA	NA	NA	NA	NA	NA	NA	NA	NA	NA	NA	NA	NA	NA	NA	4.5 (0.048993)	NA	NA	NA	NA	NA	NA	NA	NA	NA	NA	NA	NA	NA	NA	NA	NA	NA	NA
DNA replication-dependent chromatin organization	NA	NA	NA	NA	NA	5.3 (0.014286)	NA	NA	NA	NA	NA	4.4 (0.009658)	NA	NA	NA	NA	NA	NA	NA	NA	NA	NA	NA	NA	NA	NA	NA	NA	NA	NA	NA	NA	NA	NA	NA	NA	NA	NA	NA	NA	NA
DNA replication-independent chromatin organization	NA	NA	NA	NA	NA	NA	NA	NA	NA	NA	NA	NA	NA	NA	NA	NA	NA	NA	20 (0.042473)	NA	NA	NA	NA	NA	NA	NA	NA	NA	NA	NA	NA	NA	NA	NA	NA	NA	NA	NA	NA	NA	NA
DNA secondary structure binding	NA	NA	NA	NA	NA	NA	NA	NA	NA	NA	NA	NA	NA	NA	NA	NA	NA	NA	NA	2.4 (0.043809)	NA	NA	NA	NA	NA	NA	NA	NA	NA	NA	NA	NA	NA	NA	NA	NA	NA	NA	NA	NA	NA
DNA topological change	NA	NA	NA	NA	NA	NA	NA	NA	NA	NA	NA	NA	NA	NA	NA	NA	NA	NA	NA	NA	NA	NA	NA	NA	NA	NA	NA	2.3 (0.006471)	NA	NA	NA	NA	NA	NA	NA	NA	NA	NA	NA	NA	NA
DNA-templated transcription, termination	NA	NA	NA	NA	NA	NA	NA	NA	2.5 (0.004796)	NA	NA	NA	NA	NA	NA	NA	NA	NA	NA	NA	NA	NA	NA	NA	NA	NA	NA	NA	NA	NA	NA	NA	NA	NA	NA	NA	NA	NA	NA	NA	NA
DSIF complex	NA	NA	NA	NA	NA	NA	NA	NA	NA	NA	NA	NA	NA	NA	NA	NA	NA	NA	NA	NA	NA	NA	NA	NA	NA	NA	NA	NA	NA	NA	NA	NA	NA	NA	NA	NA	16.7 (0.043478)	NA	5.9 (0.043478)	NA	NA
DUBm complex	NA	NA	NA	NA	NA	NA	NA	NA	2.5 (0.039787)	NA	NA	NA	NA	NA	NA	NA	NA	NA	NA	NA	NA	NA	NA	NA	NA	NA	NA	NA	NA	NA	NA	NA	NA	NA	NA	NA	NA	NA	NA	NA	NA
ER-dependent peroxisome organization	NA	NA	NA	NA	NA	NA	NA	NA	NA	NA	NA	NA	NA	NA	NA	NA	NA	NA	NA	NA	NA	NA	NA	NA	NA	NA	NA	2.3 (0.04367)	NA	NA	NA	NA	NA	NA	NA	NA	NA	NA	NA	NA	NA
ER-nucleus signaling pathway	NA	NA	NA	NA	NA	NA	NA	NA	NA	NA	NA	9.1 (0.023256)	NA	NA	NA	NA	NA	NA	NA	NA	NA	NA	NA	NA	NA	NA	NA	NA	NA	NA	NA	NA	NA	NA	NA	NA	NA	NA	NA	NA	NA
ESCRT complex	NA	NA	NA	NA	NA	NA	NA	NA	NA	2.2 (0.022552)	NA	NA	NA	NA	NA	NA	NA	NA	NA	NA	NA	NA	NA	NA	NA	NA	NA	NA	NA	NA	NA	NA	NA	NA	NA	NA	NA	NA	NA	NA	NA
ESCRT complex assembly	NA	NA	NA	NA	NA	NA	NA	NA	NA	NA	NA	NA	NA	NA	NA	NA	NA	NA	NA	NA	NA	NA	NA	NA	NA	NA	NA	NA	NA	5.3 (0.013272)	NA	NA	NA	NA	NA	NA	NA	NA	NA	NA	NA
FAD transport	NA	NA	NA	NA	NA	NA	NA	NA	NA	NA	NA	NA	NA	NA	NA	NA	NA	NA	NA	NA	NA	NA	NA	NA	NA	NA	NA	NA	NA	NA	NA	NA	NA	NA	NA	NA	NA	NA	NA	NA	4.9 (0.012097)
G-quadruplex DNA formation	NA	NA	NA	NA	NA	NA	NA	NA	NA	NA	NA	NA	NA	NA	NA	NA	NA	NA	NA	NA	NA	NA	NA	NA	NA	NA	NA	NA	NA	NA	NA	NA	NA	NA	NA	33.3 (0.013453)	NA	NA	NA	NA	NA
GDP-mannose metabolic process	NA	NA	NA	NA	NA	NA	NA	NA	NA	NA	NA	NA	NA	NA	NA	NA	NA	NA	NA	NA	NA	NA	NA	NA	NA	NA	NA	4.7 (0.038462)	NA	NA	NA	NA	NA	NA	NA	NA	NA	NA	NA	NA	NA
GID complex	NA	6.7 (0.005638)	NA	NA	NA	NA	3.8 (0.04635)	NA	NA	NA	NA	NA	NA	NA	NA	NA	NA	NA	NA	8.3 (0.00206)	NA	NA	5.9 (0.031109)	12.5 (0.031109)	NA	NA	2.4 (0.010827)	NA	NA	NA	NA	NA	NA	NA	NA	NA	NA	NA	NA	NA	2.8 (0.022743)
GTP metabolic process	NA	NA	NA	NA	NA	NA	NA	NA	NA	NA	NA	NA	NA	NA	NA	NA	NA	NA	NA	NA	NA	NA	NA	NA	NA	NA	NA	NA	NA	NA	100 (0.043478)	NA	NA	NA	NA	NA	NA	NA	NA	NA	NA
HIR complex	NA	NA	NA	NA	NA	NA	NA	NA	NA	NA	NA	NA	NA	NA	NA	NA	NA	NA	33.3 (0.002976)	NA	NA	NA	NA	NA	NA	NA	NA	NA	NA	NA	NA	NA	NA	NA	NA	NA	NA	NA	NA	NA	NA
IRE1-mediated unfolded protein response	NA	NA	NA	NA	NA	NA	NA	NA	NA	NA	NA	NA	NA	NA	NA	NA	NA	NA	NA	NA	NA	NA	NA	NA	NA	NA	NA	NA	NA	NA	NA	NA	NA	NA	NA	NA	NA	NA	NA	NA	3.3 (0.042735)
ITP metabolic process	NA	NA	NA	NA	NA	NA	NA	NA	NA	NA	NA	NA	NA	NA	NA	NA	NA	NA	NA	NA	NA	NA	NA	NA	NA	NA	NA	NA	NA	NA	Inf (0.021739)	NA	NA	NA	NA	NA	NA	NA	NA	NA	NA
MIH complex	NA	NA	NA	NA	NA	NA	NA	NA	NA	NA	NA	NA	NA	NA	NA	3.6 (0.021978)	NA	NA	NA	NA	NA	NA	NA	NA	NA	NA	NA	NA	NA	NA	NA	NA	NA	NA	NA	NA	NA	NA	NA	NA	NA
Mre11 complex	NA	NA	NA	NA	NA	NA	NA	NA	NA	NA	NA	NA	NA	NA	NA	NA	NA	NA	NA	NA	NA	NA	NA	NA	NA	NA	NA	NA	2.2 (0.041365)	NA	NA	NA	NA	NA	NA	NA	NA	NA	NA	NA	NA
MutSgamma complex	NA	NA	NA	NA	NA	NA	NA	NA	NA	NA	NA	NA	NA	NA	NA	NA	NA	NA	NA	28.6 (0.035714)	NA	NA	NA	NA	NA	NA	NA	NA	NA	NA	NA	NA	NA	NA	NA	NA	NA	NA	NA	NA	NA
NAD metabolic process	NA	NA	NA	NA	NA	2.4 (0.044142)	NA	NA	NA	NA	NA	NA	NA	NA	NA	NA	NA	NA	NA	NA	NA	NA	NA	NA	NA	2.8 (0.000876)	NA	NA	NA	NA	NA	NA	NA	NA	NA	NA	NA	NA	NA	NA	NA
NADH dehydrogenase activity	NA	NA	NA	NA	NA	NA	NA	NA	NA	NA	NA	NA	NA	NA	NA	NA	NA	NA	NA	NA	NA	NA	NA	NA	NA	10.5 (0.01)	NA	NA	NA	NA	NA	NA	NA	NA	NA	NA	NA	NA	NA	NA	NA
NADH kinase activity	NA	NA	NA	NA	NA	NA	NA	NA	NA	NA	NA	NA	NA	NA	NA	NA	NA	NA	NA	NA	NA	NA	NA	NA	NA	NA	NA	NA	NA	NA	NA	NA	NA	NA	2.1 (0.036731)	NA	NA	NA	NA	NA	NA
NADH metabolic process	NA	NA	NA	NA	NA	NA	NA	NA	NA	NA	NA	NA	NA	NA	NA	NA	2.5 (0.031757)	NA	NA	NA	NA	NA	NA	NA	NA	3.3 (0.00048)	NA	NA	NA	NA	NA	NA	NA	NA	NA	NA	NA	NA	NA	NA	NA
NADP binding	NA	NA	NA	NA	NA	NA	3.6 (0.033387)	NA	NA	NA	NA	NA	NA	NA	NA	NA	2.3 (0.027684)	3.4 (0.010802)	NA	NA	NA	NA	NA	NA	NA	NA	NA	NA	NA	NA	NA	4.1 (0.001337)	NA	NA	NA	NA	NA	NA	NA	NA	NA
NADP metabolic process	NA	NA	NA	NA	NA	NA	NA	NA	NA	NA	NA	NA	NA	NA	NA	NA	2.2 (0.020141)	NA	NA	NA	NA	NA	NA	NA	NA	NA	NA	NA	NA	NA	NA	NA	NA	NA	NA	NA	NA	NA	NA	NA	NA
NuA4 histone acetyltransferase complex binding	NA	NA	NA	NA	NA	NA	NA	NA	NA	NA	NA	NA	NA	NA	4.5 (0.039409)	NA	NA	NA	NA	NA	NA	NA	NA	NA	NA	NA	NA	NA	NA	NA	NA	NA	NA	NA	NA	NA	NA	NA	NA	NA	NA
O-acyltransferase activity	NA	NA	NA	NA	NA	NA	NA	NA	NA	3.4 (0.014674)	NA	NA	NA	NA	NA	NA	NA	NA	NA	NA	NA	NA	NA	NA	NA	NA	NA	NA	NA	NA	NA	NA	NA	NA	NA	NA	NA	NA	NA	NA	NA
P-type transmembrane transporter activity	NA	NA	NA	NA	NA	NA	NA	NA	NA	NA	NA	NA	NA	NA	NA	NA	NA	NA	NA	NA	NA	NA	NA	NA	NA	NA	4.1 (0.010428)	NA	NA	NA	NA	NA	NA	NA	NA	NA	NA	NA	NA	NA	NA
PcG protein complex	NA	NA	NA	NA	NA	NA	NA	6.2 (0.031228)	NA	8.3 (0.028644)	NA	NA	NA	NA	NA	NA	NA	NA	NA	NA	NA	NA	NA	NA	NA	NA	NA	NA	NA	NA	NA	NA	NA	NA	NA	NA	NA	NA	NA	NA	5 (0.046656)
Prp19 complex	NA	2.6 (0.012619)	NA	NA	NA	NA	NA	NA	NA	NA	NA	NA	NA	NA	NA	NA	NA	NA	NA	NA	NA	NA	NA	NA	NA	NA	NA	NA	NA	NA	NA	NA	NA	NA	NA	NA	NA	NA	NA	NA	NA
RNA cap binding	NA	NA	NA	NA	NA	NA	NA	NA	NA	NA	NA	NA	NA	NA	NA	NA	3.8 (0.00892)	NA	NA	NA	NA	NA	NA	NA	NA	NA	NA	NA	NA	NA	NA	NA	NA	NA	NA	NA	NA	NA	NA	NA	NA
RNA polymerase I assembly	NA	25 (0.040698)	NA	NA	NA	NA	NA	NA	NA	NA	NA	9.1 (0.036822)	NA	NA	NA	NA	NA	NA	NA	NA	NA	NA	NA	NA	NA	NA	NA	NA	NA	NA	NA	NA	NA	NA	NA	NA	NA	NA	NA	NA	NA
RNA polymerase II C-terminal domain binding	NA	NA	NA	NA	NA	NA	NA	NA	9.7 (0.006494)	NA	NA	NA	NA	NA	NA	NA	NA	NA	NA	NA	NA	NA	NA	NA	NA	NA	3.3 (0.04329)	NA	NA	NA	NA	NA	NA	NA	NA	NA	NA	NA	NA	NA	NA
RNA polymerase II core complex assembly	NA	25 (0.040698)	NA	NA	NA	NA	NA	NA	NA	NA	NA	9.1 (0.036822)	NA	NA	NA	NA	NA	NA	NA	NA	NA	NA	NA	NA	NA	NA	NA	NA	NA	NA	NA	NA	NA	NA	NA	NA	NA	NA	NA	NA	NA
RNA splicing, via endonucleolytic cleavage and ligation	NA	NA	NA	NA	NA	NA	NA	NA	NA	3.3 (0.005536)	NA	2.6 (0.001347)	NA	NA	NA	NA	NA	NA	NA	NA	NA	NA	NA	NA	NA	NA	NA	NA	NA	NA	NA	NA	NA	NA	NA	NA	NA	NA	NA	NA	NA
RNA-dependent DNA biosynthetic process	NA	NA	NA	NA	NA	NA	NA	NA	NA	NA	NA	NA	NA	NA	NA	NA	NA	NA	NA	NA	NA	NA	NA	NA	NA	NA	NA	NA	NA	NA	NA	NA	NA	NA	NA	4.1 (0.027625)	NA	NA	NA	NA	NA
RecQ family helicase-topoisomerase III complex	NA	NA	NA	NA	NA	NA	NA	NA	NA	NA	NA	NA	NA	NA	NA	NA	NA	NA	NA	NA	NA	NA	NA	NA	NA	NA	NA	4.7 (0.008034)	NA	NA	NA	NA	NA	NA	NA	20 (0.022958)	NA	NA	NA	NA	NA
Rix1 complex	NA	NA	NA	NA	NA	NA	NA	NA	NA	NA	NA	NA	NA	NA	3 (0.007363)	NA	NA	NA	NA	NA	NA	NA	NA	NA	NA	NA	NA	NA	NA	NA	NA	NA	NA	NA	NA	NA	NA	NA	NA	NA	NA
S-methyltransferase activity	NA	NA	NA	NA	NA	NA	NA	NA	NA	4.2 (0.016937)	NA	NA	NA	NA	NA	NA	2.9 (0.032459)	NA	NA	NA	NA	NA	NA	NA	NA	NA	NA	NA	NA	NA	NA	NA	NA	NA	NA	NA	NA	NA	NA	NA	NA
Set3 complex	NA	NA	NA	NA	NA	NA	NA	NA	NA	NA	NA	NA	NA	NA	NA	NA	NA	NA	NA	NA	NA	NA	NA	NA	NA	NA	NA	NA	NA	2.1 (0.031602)	NA	NA	NA	NA	NA	NA	NA	NA	NA	NA	NA
Sm-like protein family complex	NA	2.1 (0.001994)	NA	NA	NA	NA	NA	NA	NA	NA	NA	NA	NA	NA	NA	NA	NA	NA	NA	NA	NA	NA	NA	NA	NA	NA	NA	NA	NA	NA	NA	NA	NA	NA	NA	NA	NA	NA	NA	NA	NA
UDP-alpha-D-glucose:glucosyl-glycogenin alpha-D-glucosyltransferase activity	NA	NA	NA	NA	NA	NA	NA	NA	NA	NA	NA	NA	NA	NA	NA	NA	NA	NA	NA	NA	NA	NA	NA	NA	NA	NA	NA	NA	NA	NA	NA	NA	NA	NA	NA	NA	NA	6.2 (0.027778)	NA	NA	NA
UDP-glycosyltransferase activity	NA	NA	NA	NA	NA	NA	NA	NA	NA	NA	NA	NA	NA	NA	NA	NA	NA	NA	NA	NA	NA	NA	NA	NA	NA	2.2 (0.032795)	NA	NA	NA	NA	NA	NA	NA	NA	NA	NA	NA	NA	NA	NA	NA
acetyl-CoA:L-glutamate N-acetyltransferase activity	10 (0.047619)	NA	NA	NA	NA	NA	NA	NA	NA	NA	NA	NA	NA	NA	NA	NA	NA	NA	NA	NA	NA	NA	NA	NA	NA	NA	NA	3.4 (0.047619)	NA	NA	NA	NA	NA	NA	NA	NA	NA	NA	NA	NA	NA
acid phosphatase activity	NA	NA	NA	NA	NA	NA	NA	NA	NA	NA	NA	2.9 (0.03735)	NA	NA	NA	NA	NA	8.7 (0.028565)	NA	NA	NA	NA	NA	NA	NA	5.1 (0.004409)	NA	NA	NA	NA	NA	6.7 (0.004409)	NA	NA	NA	NA	NA	NA	NA	NA	NA
acid-ammonia (or amide) ligase activity	NA	NA	NA	5.4 (0.025997)	5.9 (0.025997)	NA	NA	NA	NA	NA	NA	NA	NA	NA	NA	NA	NA	NA	NA	NA	NA	NA	NA	NA	NA	NA	NA	NA	NA	NA	NA	NA	NA	NA	NA	NA	NA	NA	NA	NA	NA
acireductone synthase activity	NA	NA	NA	NA	NA	NA	NA	NA	NA	NA	NA	NA	NA	NA	NA	NA	NA	NA	NA	NA	NA	NA	NA	NA	NA	NA	NA	NA	NA	NA	NA	NA	NA	NA	NA	NA	NA	12.5 (0.014085)	NA	NA	NA
actin lateral binding	NA	NA	NA	NA	NA	NA	NA	NA	NA	NA	NA	NA	NA	NA	NA	NA	NA	NA	NA	NA	NA	NA	NA	NA	NA	NA	NA	NA	NA	5.3 (0.028409)	NA	NA	NA	NA	NA	NA	16.7 (0.001894)	NA	NA	NA	NA
acyl binding	NA	NA	NA	11.1 (0.029502)	NA	20 (0.019329)	NA	NA	NA	NA	NA	NA	NA	NA	NA	NA	NA	NA	NA	NA	NA	NA	NA	NA	NA	NA	NA	NA	NA	NA	NA	NA	NA	NA	NA	NA	NA	NA	NA	NA	NA
acyl-CoA ceramide synthase complex	NA	NA	NA	NA	NA	NA	NA	NA	NA	NA	NA	NA	NA	16.7 (0.016296)	NA	NA	NA	NA	NA	NA	NA	NA	NA	NA	NA	NA	NA	NA	NA	NA	NA	NA	NA	NA	NA	NA	NA	NA	NA	NA	NA
acyltransferase, acyl groups converted into alkyl on transfer	NA	NA	NA	NA	NA	NA	5.4 (0.032883)	NA	NA	NA	NA	NA	NA	NA	NA	NA	NA	NA	NA	NA	NA	NA	NA	NA	NA	NA	NA	NA	NA	NA	NA	NA	NA	NA	NA	NA	NA	NA	NA	NA	NA
adaptation of signaling pathway	NA	NA	NA	NA	NA	NA	NA	2.3 (0.002257)	NA	NA	NA	NA	NA	NA	NA	NA	NA	NA	NA	NA	NA	NA	NA	NA	NA	NA	NA	NA	NA	NA	NA	NA	NA	NA	NA	NA	NA	NA	NA	NA	NA
adenine metabolic process	NA	NA	NA	NA	NA	NA	NA	NA	NA	NA	NA	NA	NA	NA	NA	NA	NA	NA	NA	NA	NA	NA	NA	NA	NA	NA	NA	5.3 (0.03741)	NA	NA	NA	NA	NA	NA	NA	NA	NA	NA	NA	NA	NA
alcohol dehydrogenase [NAD(P)+] activity	NA	NA	NA	NA	NA	NA	NA	2.8 (0.037394)	NA	NA	NA	NA	NA	NA	NA	NA	NA	NA	NA	NA	NA	NA	NA	NA	NA	NA	NA	NA	NA	NA	NA	NA	NA	NA	NA	NA	NA	NA	NA	NA	NA
alkali metal ion binding	NA	NA	NA	NA	NA	NA	NA	NA	NA	NA	NA	NA	NA	NA	NA	3.6 (0.019257)	11.8 (0.003783)	NA	NA	NA	NA	NA	NA	NA	NA	NA	NA	NA	NA	NA	NA	NA	NA	NA	NA	NA	NA	6.2 (0.046442)	NA	NA	NA
alkanesulfonate metabolic process	NA	NA	NA	NA	12.5 (0.027043)	NA	NA	NA	16.7 (0.036358)	16.7 (0.026743)	NA	NA	NA	NA	NA	NA	NA	NA	NA	NA	NA	NA	NA	NA	NA	NA	NA	NA	NA	NA	NA	NA	NA	NA	NA	NA	NA	12.5 (0.018029)	NA	NA	NA
allantoin metabolic process	3.2 (0.04696)	NA	NA	NA	NA	NA	NA	NA	NA	NA	NA	NA	2.2 (0.006762)	NA	NA	NA	NA	NA	NA	9.5 (0.001397)	NA	NA	NA	NA	NA	NA	NA	NA	NA	NA	NA	NA	NA	NA	NA	NA	NA	NA	NA	NA	NA
alpha,alpha-trehalose-phosphate synthase complex (UDP-forming)	NA	NA	NA	NA	NA	NA	NA	NA	NA	NA	NA	NA	NA	NA	NA	NA	8.6 (0.000122)	NA	NA	NA	NA	NA	NA	NA	NA	3.8 (0.031309)	NA	NA	NA	3.9 (0.001604)	NA	NA	NA	NA	NA	NA	NA	NA	NA	NA	4.9 (0.006476)
alpha-1,4-mannosyltransferase activity	NA	NA	NA	NA	NA	NA	NA	NA	NA	NA	NA	NA	NA	NA	NA	NA	NA	NA	NA	NA	NA	NA	NA	NA	NA	NA	NA	7.1 (0.025)	NA	NA	NA	NA	NA	NA	NA	NA	NA	NA	NA	NA	NA
amidase activity	NA	NA	NA	NA	NA	NA	NA	NA	NA	NA	NA	NA	NA	NA	NA	NA	NA	NA	NA	33.3 (0.033333)	NA	NA	NA	NA	NA	NA	NA	NA	NA	NA	NA	NA	NA	NA	NA	NA	NA	NA	NA	NA	NA
amide binding	NA	NA	NA	NA	NA	NA	2.4 (0.006751)	NA	NA	NA	NA	NA	NA	NA	NA	NA	NA	NA	NA	NA	NA	NA	NA	NA	NA	NA	NA	NA	NA	NA	NA	NA	NA	NA	NA	NA	NA	NA	NA	NA	NA
amide transport	NA	NA	NA	NA	NA	2.6 (0.002808)	NA	NA	NA	NA	NA	NA	NA	NA	NA	NA	NA	2.4 (0.004227)	NA	NA	NA	NA	2.5 (0.047372)	NA	NA	NA	NA	NA	NA	NA	NA	NA	NA	NA	NA	6.1 (0.004227)	NA	NA	NA	NA	NA
amine metabolic process	NA	NA	NA	NA	NA	2.3 (0.004119)	2.3 (0.044532)	NA	NA	2.3 (0.002115)	NA	NA	NA	NA	NA	NA	NA	NA	NA	NA	NA	NA	NA	4.9 (0.018325)	NA	NA	NA	NA	NA	NA	NA	NA	NA	NA	NA	3.6 (0.028191)	NA	NA	NA	NA	NA
amino acid kinase activity	NA	NA	NA	NA	NA	NA	NA	NA	NA	NA	NA	NA	NA	NA	NA	NA	NA	NA	NA	NA	NA	NA	8.3 (0.034362)	NA	NA	NA	NA	NA	NA	NA	NA	NA	NA	NA	NA	NA	NA	NA	NA	NA	NA
amino-acid betaine metabolic process	NA	NA	NA	NA	NA	NA	13.3 (0.024769)	NA	NA	NA	NA	NA	3.3 (0.024769)	NA	NA	NA	NA	NA	NA	NA	3.5 (0.040178)	NA	NA	NA	NA	NA	NA	NA	NA	NA	NA	NA	NA	NA	NA	NA	NA	NA	NA	NA	NA
aminoglycan metabolic process	NA	NA	NA	NA	NA	NA	2.5 (0.020397)	NA	2.2 (0.009897)	NA	NA	NA	NA	NA	NA	NA	NA	NA	NA	NA	NA	NA	NA	NA	NA	NA	NA	NA	NA	NA	NA	NA	NA	NA	NA	NA	NA	2.2 (0.004289)	NA	NA	NA
anaerobic respiration	NA	NA	NA	NA	NA	NA	NA	NA	NA	NA	NA	NA	NA	25 (0.020619)	NA	NA	NA	12.5 (0.041022)	NA	NA	NA	NA	NA	NA	NA	NA	NA	NA	NA	NA	NA	NA	NA	NA	NA	NA	NA	NA	NA	NA	NA
anaphase-promoting complex binding	NA	NA	NA	3.7 (0.014778)	4 (0.043897)	7.1 (0.02941)	NA	NA	NA	NA	NA	NA	NA	NA	NA	NA	NA	NA	NA	NA	NA	7.7 (0.043897)	NA	NA	NA	NA	NA	NA	NA	NA	NA	NA	NA	NA	NA	NA	NA	NA	NA	NA	NA
anaphase-promoting complex-dependent catabolic process	NA	NA	NA	NA	NA	NA	NA	NA	NA	NA	NA	NA	NA	NA	NA	NA	NA	NA	NA	NA	NA	3.2 (0.008253)	NA	NA	NA	NA	NA	NA	NA	NA	NA	NA	NA	NA	NA	NA	NA	NA	NA	NA	NA
anatomical structure development	NA	NA	NA	NA	NA	2.1 (0.02664)	3.2 (0.013531)	NA	NA	NA	NA	NA	NA	NA	NA	NA	NA	NA	NA	NA	NA	NA	NA	NA	NA	NA	NA	NA	NA	NA	NA	NA	NA	NA	NA	NA	NA	NA	NA	NA	NA
anatomical structure formation involved in morphogenesis	NA	NA	NA	NA	NA	NA	3.9 (0.048166)	NA	NA	NA	NA	NA	NA	NA	NA	NA	NA	NA	NA	NA	NA	NA	NA	NA	NA	NA	NA	NA	NA	NA	NA	NA	NA	NA	NA	NA	NA	NA	NA	NA	NA
anchored component of membrane	NA	NA	NA	NA	NA	NA	3.8 (0.000827)	NA	NA	NA	NA	NA	2.4 (0)	NA	NA	NA	3.5 (2e-06)	2.6 (0.012769)	NA	2.9 (0.021143)	NA	NA	2.4 (0.048873)	5.4 (0.042098)	NA	NA	2.1 (0.001741)	2.5 (0)	NA	NA	NA	2.4 (0.001383)	NA	NA	NA	3.9 (0.048873)	NA	NA	NA	NA	2.2 (0.000255)
antimonite transport	NA	NA	NA	NA	NA	NA	NA	NA	NA	NA	NA	NA	NA	NA	NA	NA	NA	NA	NA	NA	NA	NA	NA	100 (0.034483)	NA	NA	NA	NA	NA	NA	NA	NA	NA	NA	NA	NA	NA	NA	NA	NA	NA
antiporter activity	NA	NA	NA	NA	NA	NA	NA	NA	NA	NA	NA	NA	NA	NA	NA	NA	NA	NA	NA	NA	NA	NA	NA	NA	NA	NA	NA	NA	NA	NA	NA	NA	2.8 (0.026638)	NA	NA	NA	NA	NA	NA	NA	NA
antisense transcription	NA	NA	NA	NA	NA	NA	NA	NA	NA	NA	2.2 (0)	NA	NA	NA	NA	2.2 (0)	NA	NA	NA	NA	NA	NA	NA	NA	NA	2.1 (0)	NA	NA	2.1 (0)	NA	NA	NA	NA	2.1 (0)	2.2 (0)	NA	NA	NA	NA	2.1 (0)	NA
arginine metabolic process	6.8 (0.013744)	NA	NA	NA	NA	NA	NA	NA	NA	NA	NA	NA	NA	NA	NA	NA	3.3 (0.017953)	NA	NA	NA	NA	NA	NA	NA	NA	NA	NA	2.5 (0.013744)	NA	NA	NA	NA	NA	NA	NA	NA	NA	NA	NA	NA	NA
argininosuccinate synthase activity	NA	NA	NA	NA	NA	NA	NA	NA	NA	NA	NA	NA	NA	NA	NA	NA	NA	NA	NA	NA	NA	NA	NA	NA	NA	NA	NA	NA	NA	NA	NA	NA	NA	NA	NA	NA	NA	NA	NA	NA	10 (0.027027)
aromatic amino acid family metabolic process	NA	NA	NA	2.1 (0.003076)	NA	3.2 (0.002897)	NA	NA	NA	3.8 (0.023034)	NA	NA	NA	NA	NA	NA	NA	NA	NA	NA	NA	2.6 (0.013099)	4.7 (0.043706)	10.3 (0.013099)	NA	NA	NA	NA	NA	NA	NA	NA	NA	NA	NA	NA	NA	NA	NA	NA	NA
arsenate ion transmembrane transport	NA	NA	NA	NA	NA	NA	NA	NA	NA	NA	NA	NA	NA	NA	4.5 (0.010078)	NA	11.8 (0.008063)	NA	NA	28.6 (0.003359)	6.9 (0.004703)	NA	NA	NA	NA	NA	NA	NA	NA	NA	NA	NA	NA	NA	NA	NA	NA	NA	NA	NA	10 (0.004703)
arsenate reductase activity	20 (0.021739)	NA	NA	NA	NA	NA	NA	NA	NA	NA	NA	NA	NA	NA	NA	NA	NA	NA	NA	33.3 (0.02795)	NA	NA	NA	100 (0.009317)	NA	NA	NA	NA	9.1 (0.024845)	NA	NA	20 (0.034161)	20 (0.02795)	NA	NA	NA	NA	NA	NA	NA	NA
aspartate-semialdehyde dehydrogenase activity	NA	NA	NA	NA	NA	NA	NA	NA	NA	NA	NA	NA	NA	50 (0.02439)	NA	NA	NA	NA	NA	NA	NA	NA	NA	NA	NA	NA	NA	NA	NA	NA	NA	NA	NA	NA	NA	NA	NA	NA	NA	NA	NA
aspartic-type peptidase activity	NA	NA	NA	2.2 (0.009099)	2.4 (0.009099)	NA	5.4 (0.041298)	3.8 (0.007115)	NA	NA	NA	NA	2.6 (0.00244)	NA	NA	NA	3.4 (0.010332)	NA	NA	NA	NA	4.4 (0.003133)	NA	NA	NA	NA	NA	2.1 (0.038039)	NA	2.1 (0.047744)	NA	NA	NA	NA	NA	NA	NA	NA	NA	NA	5 (0.001817)
autophagosome	NA	NA	NA	NA	NA	NA	NA	NA	NA	NA	NA	NA	NA	NA	NA	NA	NA	NA	NA	NA	NA	NA	NA	NA	NA	NA	NA	4.2 (0.004125)	NA	3.1 (0.008037)	NA	NA	NA	NA	NA	NA	NA	NA	NA	NA	NA
basal transcription machinery binding	NA	NA	NA	NA	NA	NA	NA	NA	2.2 (0.04121)	NA	NA	NA	NA	NA	NA	NA	NA	NA	NA	NA	NA	NA	NA	5.9 (0.014021)	NA	NA	NA	NA	NA	NA	NA	NA	NA	NA	NA	NA	NA	NA	NA	NA	NA
base conversion or substitution editing	NA	NA	NA	NA	NA	NA	NA	NA	NA	NA	NA	NA	NA	NA	NA	NA	NA	NA	NA	NA	NA	NA	NA	NA	NA	NA	NA	NA	NA	NA	NA	NA	10 (0.018018)	NA	NA	NA	NA	NA	NA	NA	NA
benzene-containing compound metabolic process	3.5 (0.007649)	NA	NA	3 (0.00195)	3.2 (0.001356)	5.7 (0.000975)	NA	2.3 (0.041046)	NA	4.5 (0.00195)	NA	NA	NA	NA	NA	NA	NA	NA	NA	5.3 (0.009076)	NA	NA	7.4 (0.009832)	16.7 (0.001246)	NA	NA	NA	NA	NA	NA	33.3 (0.02476)	NA	NA	NA	NA	NA	NA	NA	NA	NA	NA
benzil reductase [(S)-benzoin-forming] activity	NA	NA	NA	NA	NA	NA	NA	NA	NA	NA	NA	NA	NA	NA	NA	NA	NA	NA	NA	33.3 (0.040541)	NA	NA	NA	NA	NA	NA	NA	NA	NA	NA	NA	NA	NA	NA	NA	NA	NA	12.5 (0.027027)	NA	NA	NA
biological adhesion	NA	NA	NA	NA	NA	NA	NA	3.3 (0.000654)	NA	2.6 (0.034819)	NA	NA	NA	NA	NA	NA	NA	NA	NA	NA	NA	NA	NA	NA	NA	NA	NA	NA	NA	NA	NA	2.2 (0.039668)	NA	NA	NA	NA	NA	NA	NA	NA	NA
biological process involved in intraspecies interaction between organisms	NA	NA	NA	NA	NA	NA	NA	2.2 (0.026909)	NA	NA	NA	NA	NA	NA	NA	NA	NA	NA	NA	NA	NA	NA	NA	NA	NA	NA	NA	NA	NA	NA	NA	NA	NA	NA	NA	NA	NA	NA	NA	NA	NA
branched-chain amino acid metabolic process	NA	NA	NA	2.2 (0.003757)	NA	3.3 (0.017483)	NA	NA	2.6 (0.017483)	NA	NA	NA	NA	NA	NA	NA	NA	NA	NA	NA	NA	NA	NA	NA	NA	NA	2.3 (0.003084)	NA	NA	NA	NA	NA	NA	NA	NA	NA	NA	NA	NA	NA	NA
branched-chain-2-oxoacid decarboxylase activity	NA	NA	NA	5.4 (0.023715)	NA	NA	NA	NA	NA	NA	6.5 (0.023715)	NA	NA	NA	NA	NA	NA	NA	NA	NA	NA	11.1 (0.023715)	NA	NA	NA	NA	NA	NA	NA	NA	NA	NA	NA	NA	NA	NA	NA	NA	NA	NA	NA
branched-chain-amino-acid transaminase activity	NA	NA	NA	NA	NA	NA	NA	NA	NA	NA	NA	NA	NA	NA	NA	NA	NA	NA	NA	NA	NA	NA	NA	NA	NA	NA	4.1 (0.012987)	NA	NA	NA	NA	NA	NA	NA	NA	NA	NA	NA	NA	NA	4.9 (0.045796)
brassicasterol glucosyltransferase activity	NA	NA	NA	NA	NA	NA	NA	NA	NA	NA	NA	NA	NA	NA	NA	NA	NA	NA	NA	NA	NA	NA	NA	NA	NA	NA	NA	7.1 (0.041667)	NA	NA	NA	NA	NA	NA	NA	NA	NA	NA	NA	NA	NA
budding cell isotropic bud growth	NA	NA	NA	NA	NA	NA	NA	NA	NA	NA	NA	NA	NA	NA	NA	NA	NA	NA	NA	NA	NA	NA	NA	NA	NA	NA	NA	NA	NA	NA	NA	NA	NA	NA	NA	NA	8.7 (0.03693)	NA	NA	NA	NA
calmodulin binding	NA	NA	NA	NA	NA	NA	NA	NA	3.1 (0.012112)	NA	NA	NA	NA	NA	NA	NA	NA	2.4 (0.020638)	NA	NA	NA	NA	NA	NA	NA	NA	NA	NA	NA	NA	NA	NA	NA	NA	NA	NA	NA	NA	NA	NA	NA
calmodulin-dependent protein kinase activity	NA	NA	NA	NA	NA	NA	NA	NA	NA	NA	NA	NA	NA	NA	NA	NA	NA	NA	25 (0.032051)	NA	NA	NA	NA	NA	NA	NA	NA	NA	NA	NA	NA	NA	NA	NA	NA	12.5 (0.032051)	NA	NA	NA	NA	NA
carbamoyl-phosphate synthase complex	20 (0.013043)	NA	NA	NA	NA	NA	NA	12.5 (0.041304)	NA	NA	NA	NA	NA	NA	NA	NA	11.1 (0.043478)	NA	NA	NA	NA	NA	NA	NA	NA	NA	NA	NA	NA	NA	NA	NA	NA	NA	NA	NA	NA	NA	NA	NA	NA
carbohydrate binding	NA	NA	NA	NA	NA	NA	2.9 (0.020812)	NA	NA	NA	NA	NA	NA	NA	NA	NA	2.5 (0.001455)	NA	NA	NA	NA	NA	NA	NA	NA	NA	NA	NA	NA	NA	NA	NA	NA	NA	NA	NA	NA	NA	NA	NA	NA
carbohydrate biosynthetic process	NA	NA	NA	NA	NA	NA	NA	NA	NA	NA	NA	NA	NA	NA	NA	NA	2.3 (0.044063)	NA	NA	NA	NA	NA	NA	NA	NA	NA	NA	NA	NA	NA	NA	NA	NA	NA	NA	NA	NA	NA	NA	NA	NA
carbohydrate catabolic process	NA	NA	NA	NA	NA	NA	NA	NA	NA	NA	NA	NA	NA	NA	NA	NA	3.1 (0.005628)	NA	NA	NA	NA	NA	NA	NA	NA	NA	NA	NA	NA	NA	NA	NA	NA	NA	NA	NA	NA	NA	NA	NA	NA
carbohydrate metabolic process	NA	NA	NA	NA	NA	NA	2.7 (0)	NA	NA	NA	NA	NA	NA	NA	NA	NA	NA	NA	NA	NA	NA	NA	NA	NA	NA	NA	NA	NA	NA	NA	NA	NA	NA	NA	NA	NA	NA	NA	NA	NA	NA
carbohydrate phosphatase activity	NA	NA	NA	NA	NA	NA	NA	NA	NA	NA	NA	NA	NA	NA	NA	NA	3.2 (0.022726)	NA	NA	NA	NA	NA	NA	NA	NA	NA	NA	NA	NA	NA	NA	NA	NA	NA	NA	NA	NA	NA	NA	NA	2.7 (0.040809)
carbohydrate transmembrane transport	NA	NA	NA	NA	NA	NA	NA	NA	NA	NA	NA	NA	NA	NA	NA	NA	NA	NA	NA	NA	NA	NA	NA	NA	NA	NA	NA	NA	NA	2.6 (0.014079)	NA	NA	NA	NA	NA	NA	NA	NA	NA	NA	NA
carbohydrate transport	NA	NA	NA	NA	NA	NA	NA	NA	NA	NA	NA	NA	NA	NA	NA	NA	NA	NA	NA	NA	NA	2.2 (0.002057)	NA	NA	NA	NA	NA	NA	NA	NA	NA	2.6 (0.001807)	NA	NA	NA	NA	NA	NA	NA	NA	NA
carbon-carbon lyase activity	NA	NA	NA	NA	NA	NA	NA	NA	NA	NA	NA	NA	NA	NA	NA	NA	NA	NA	NA	NA	NA	NA	NA	NA	NA	NA	NA	NA	NA	NA	NA	NA	NA	NA	NA	NA	NA	NA	NA	3.3 (0.021935)	NA
carbon-nitrogen lyase activity	6.4 (0.007774)	NA	NA	NA	NA	NA	NA	4.2 (0.011977)	5.5 (0.017295)	3.7 (0.04074)	NA	NA	NA	NA	NA	NA	NA	NA	NA	NA	NA	NA	NA	NA	NA	NA	NA	NA	NA	NA	NA	NA	NA	NA	NA	NA	NA	NA	NA	NA	NA
carbon-oxygen lyase activity	NA	NA	NA	NA	NA	NA	NA	NA	NA	NA	NA	NA	NA	NA	NA	NA	2.3 (0.031709)	NA	NA	NA	NA	NA	NA	NA	NA	NA	NA	NA	NA	NA	NA	NA	NA	NA	NA	NA	NA	NA	NA	NA	NA
carbonyl reductase (NADPH) activity	NA	NA	NA	NA	NA	NA	NA	NA	NA	NA	NA	5.9 (0.022245)	NA	NA	NA	NA	NA	NA	NA	NA	NA	NA	NA	NA	NA	NA	NA	NA	NA	NA	NA	NA	NA	NA	NA	NA	NA	NA	NA	NA	NA
carboxyl- or carbamoyltransferase activity	9.5 (0.001019)	NA	NA	NA	NA	NA	NA	NA	NA	NA	NA	NA	NA	NA	NA	NA	5.7 (0.014536)	NA	NA	NA	NA	NA	NA	NA	NA	NA	NA	NA	NA	NA	NA	NA	NA	NA	NA	NA	NA	NA	NA	NA	NA
carboxylic acid binding	NA	NA	NA	2.2 (0.024347)	2.4 (0.026609)	NA	5.4 (0.014371)	NA	NA	NA	NA	NA	NA	NA	NA	2.1 (6.9e-05)	NA	NA	NA	NA	NA	NA	NA	NA	NA	4.7 (0.000263)	NA	NA	NA	NA	NA	NA	NA	NA	NA	NA	NA	NA	NA	NA	NA
carboxymethylenebutenolidase activity	NA	NA	NA	NA	NA	NA	NA	NA	NA	NA	NA	NA	NA	NA	NA	NA	NA	NA	NA	NA	NA	NA	NA	NA	NA	NA	NA	NA	9.1 (0.033898)	NA	NA	NA	NA	NA	NA	NA	NA	NA	NA	NA	NA
cargo receptor ligand activity	NA	NA	NA	NA	NA	NA	NA	NA	NA	NA	NA	NA	NA	NA	NA	NA	NA	NA	NA	NA	NA	NA	NA	NA	NA	NA	NA	NA	NA	NA	NA	NA	NA	NA	NA	NA	NA	NA	5.9 (0.047135)	NA	NA
carnitine O-acyltransferase activity	NA	NA	NA	NA	NA	NA	18.2 (0.01087)	NA	NA	NA	NA	NA	NA	NA	NA	NA	NA	NA	NA	NA	NA	NA	NA	NA	NA	NA	NA	NA	NA	NA	NA	NA	NA	NA	NA	NA	NA	NA	NA	NA	NA
carnosine N-methyltransferase activity	NA	NA	NA	NA	NA	NA	NA	NA	NA	NA	NA	NA	NA	NA	NA	NA	NA	NA	NA	NA	NA	NA	NA	NA	NA	NA	NA	7.1 (0.04878)	NA	NA	Inf (0.012195)	NA	NA	NA	NA	NA	NA	NA	NA	NA	10 (0.012195)
cell adhesion molecule binding	4.8 (0.025384)	NA	NA	NA	NA	NA	NA	6.2 (0.007842)	NA	NA	NA	NA	3.3 (0.013956)	NA	NA	NA	5.7 (0.009421)	NA	NA	NA	NA	NA	NA	20 (0.025384)	NA	NA	4.1 (0.013956)	3.5 (0.03831)	2.2 (0.036114)	NA	NA	5 (0.02897)	NA	NA	NA	NA	NA	NA	NA	NA	NA
cell development	2.3 (0.009431)	NA	NA	NA	NA	NA	5.3 (0.037812)	NA	NA	NA	NA	NA	NA	NA	NA	NA	NA	NA	NA	NA	NA	NA	NA	NA	NA	NA	NA	NA	NA	NA	NA	NA	NA	NA	NA	NA	NA	NA	NA	NA	NA
cell projection membrane	NA	NA	NA	NA	NA	NA	NA	NA	NA	NA	NA	NA	NA	NA	NA	3.6 (0.048381)	NA	NA	NA	NA	NA	NA	NA	NA	NA	NA	NA	NA	NA	NA	NA	NA	NA	NA	NA	NA	NA	NA	NA	NA	NA
cell redox homeostasis	NA	NA	NA	NA	NA	NA	NA	NA	NA	NA	NA	NA	NA	NA	NA	NA	2.3 (0.015525)	NA	NA	NA	NA	NA	NA	NA	NA	NA	NA	NA	NA	NA	NA	NA	NA	NA	NA	NA	NA	NA	NA	NA	NA
cell surface	NA	NA	NA	NA	NA	NA	NA	NA	NA	NA	NA	NA	NA	NA	NA	NA	NA	NA	NA	NA	NA	NA	NA	NA	NA	NA	NA	2.3 (0.003744)	NA	NA	NA	NA	NA	NA	NA	NA	NA	NA	NA	NA	NA
cell wall organization or biogenesis	NA	NA	NA	NA	NA	NA	2.6 (0)	NA	NA	NA	NA	NA	NA	NA	NA	NA	NA	NA	2.1 (0.014124)	NA	NA	NA	NA	NA	NA	NA	NA	NA	NA	NA	NA	NA	NA	NA	NA	NA	NA	NA	NA	NA	NA
cellular alcohol metabolic process	NA	NA	NA	NA	NA	NA	NA	NA	NA	NA	NA	NA	NA	NA	NA	NA	2.8 (0.036813)	NA	NA	NA	NA	NA	NA	NA	NA	NA	NA	NA	NA	NA	NA	NA	NA	NA	NA	NA	NA	NA	NA	NA	NA
cellular amide catabolic process	NA	NA	NA	NA	NA	NA	NA	NA	NA	NA	NA	NA	NA	NA	NA	NA	NA	NA	NA	6.5 (0.008989)	NA	NA	NA	NA	NA	NA	NA	NA	NA	NA	NA	NA	NA	NA	NA	NA	NA	NA	NA	NA	NA
cellular component morphogenesis	NA	NA	NA	NA	NA	NA	NA	NA	NA	NA	NA	NA	NA	NA	NA	NA	NA	NA	NA	NA	NA	NA	NA	NA	NA	NA	NA	NA	NA	NA	NA	NA	NA	NA	NA	NA	NA	2.3 (0.011105)	NA	NA	NA
cellular lipid biosynthetic process	NA	NA	NA	NA	NA	NA	NA	NA	NA	NA	NA	NA	NA	NA	NA	NA	2.8 (0.000514)	NA	NA	NA	NA	NA	NA	NA	NA	NA	NA	NA	NA	NA	NA	NA	NA	NA	NA	NA	NA	NA	NA	NA	NA
cellular modified amino acid metabolic process	NA	NA	NA	NA	NA	NA	NA	NA	NA	NA	NA	NA	NA	NA	NA	NA	NA	NA	NA	NA	NA	NA	NA	NA	NA	NA	NA	NA	NA	NA	11.1 (0.023783)	NA	NA	NA	NA	NA	NA	NA	NA	NA	NA
cellular response to environmental stimulus	NA	NA	NA	NA	NA	NA	NA	NA	NA	NA	NA	NA	NA	2.5 (0.012548)	NA	NA	NA	NA	NA	NA	NA	NA	NA	NA	NA	NA	NA	NA	NA	NA	NA	NA	NA	NA	NA	NA	NA	NA	NA	NA	NA
cellular response to phosphate starvation	NA	NA	NA	NA	NA	NA	NA	NA	8.3 (0.015618)	NA	NA	NA	NA	NA	NA	NA	NA	12.5 (0.007974)	NA	NA	NA	NA	NA	NA	NA	NA	NA	NA	NA	NA	NA	NA	NA	NA	NA	NA	NA	NA	NA	NA	NA
central plaque of spindle pole body	NA	NA	NA	NA	NA	NA	NA	NA	NA	NA	NA	NA	NA	NA	NA	NA	NA	NA	NA	NA	NA	NA	NA	NA	NA	NA	NA	NA	NA	2.6 (0.022185)	NA	NA	NA	NA	NA	NA	NA	NA	NA	NA	NA
centromere localization	NA	NA	NA	NA	NA	NA	NA	NA	NA	NA	NA	NA	NA	NA	NA	2.4 (0.043478)	NA	NA	NA	NA	NA	NA	NA	NA	NA	NA	NA	NA	NA	NA	NA	NA	NA	NA	NA	NA	NA	NA	NA	NA	NA
chaperone binding	NA	NA	NA	NA	NA	NA	NA	NA	2.5 (0.025644)	NA	NA	NA	NA	NA	NA	NA	NA	NA	NA	NA	NA	NA	NA	NA	NA	NA	NA	NA	NA	NA	NA	NA	NA	NA	NA	NA	NA	NA	NA	NA	NA
chaperone complex	NA	NA	NA	NA	NA	NA	NA	NA	4.3 (0.00177)	NA	NA	NA	NA	NA	NA	NA	NA	5.1 (0.000144)	NA	NA	NA	NA	NA	NA	NA	3.1 (0.000144)	NA	NA	NA	NA	NA	NA	NA	NA	NA	NA	NA	NA	NA	NA	NA
chitin binding	6.2 (0.032695)	NA	NA	7.4 (0.001023)	8 (0.001347)	7.1 (0.044769)	9.1 (0.044769)	NA	NA	NA	NA	NA	NA	NA	NA	NA	NA	NA	NA	NA	NA	NA	NA	NA	NA	NA	NA	4.7 (0.013841)	NA	NA	NA	NA	7.1 (0.012346)	NA	NA	NA	NA	NA	NA	NA	NA
chitosome	NA	NA	NA	NA	NA	NA	NA	NA	16.7 (0.001378)	NA	NA	NA	NA	NA	NA	NA	NA	NA	NA	NA	NA	NA	NA	NA	NA	NA	NA	NA	NA	NA	NA	NA	NA	NA	NA	NA	NA	NA	NA	NA	NA
cholesterol alpha-glucosyltransferase activity	NA	NA	NA	NA	NA	NA	NA	NA	NA	NA	NA	NA	NA	NA	NA	NA	NA	NA	NA	NA	NA	NA	NA	NA	NA	NA	NA	7.1 (0.041667)	NA	NA	NA	NA	NA	NA	NA	NA	NA	NA	NA	NA	NA
chromatin binding	NA	NA	NA	NA	NA	NA	NA	NA	NA	NA	NA	NA	NA	NA	NA	NA	NA	NA	NA	NA	NA	NA	NA	NA	13.3 (0.010111)	NA	NA	NA	NA	NA	NA	NA	NA	NA	NA	NA	NA	NA	NA	NA	NA
chromosome organization involved in meiotic cell cycle	NA	NA	NA	NA	NA	2.4 (0.006374)	NA	NA	NA	NA	NA	NA	NA	NA	NA	NA	NA	NA	NA	NA	NA	2.5 (0.006374)	NA	NA	NA	NA	NA	NA	NA	NA	NA	NA	NA	NA	NA	NA	NA	NA	NA	NA	NA
chromosome separation	NA	NA	NA	NA	NA	NA	NA	NA	NA	NA	NA	NA	NA	NA	NA	NA	NA	NA	NA	NA	NA	NA	NA	NA	NA	NA	NA	NA	NA	NA	NA	NA	NA	NA	NA	NA	NA	NA	NA	2.2 (0.026547)	NA
chromosome, centromeric core domain	NA	NA	NA	NA	NA	NA	NA	NA	NA	NA	NA	NA	NA	NA	NA	NA	NA	NA	NA	NA	NA	NA	NA	NA	NA	NA	4.1 (0.004526)	5.3 (0.001886)	NA	NA	NA	NA	NA	NA	NA	NA	NA	NA	NA	NA	NA
chromosome, telomeric repeat region	NA	NA	NA	NA	NA	NA	NA	NA	5.4 (0.030163)	NA	NA	NA	NA	NA	NA	NA	NA	NA	NA	NA	NA	NA	NA	NA	NA	NA	NA	NA	NA	NA	NA	NA	NA	NA	NA	NA	NA	NA	NA	NA	NA
citrulline metabolic process	12.5 (0.013116)	NA	NA	NA	NA	NA	NA	NA	NA	NA	NA	NA	NA	NA	3 (0.015668)	NA	7.7 (0.039309)	NA	NA	NA	NA	NA	NA	NA	NA	NA	NA	NA	NA	NA	NA	NA	NA	NA	NA	NA	NA	NA	NA	NA	NA
cobalt ion binding	20 (0.014423)	NA	NA	NA	12.5 (0.043269)	20 (0.028846)	NA	NA	NA	NA	NA	NA	NA	NA	NA	NA	NA	NA	NA	NA	NA	25 (0.004808)	NA	NA	NA	NA	NA	NA	NA	NA	NA	NA	NA	NA	NA	NA	NA	NA	NA	NA	NA
cohesin complex	NA	NA	NA	NA	NA	NA	NA	NA	NA	NA	NA	NA	NA	NA	NA	NA	NA	NA	NA	NA	NA	NA	NA	NA	NA	NA	NA	NA	NA	4.2 (0.001003)	NA	NA	NA	NA	NA	NA	NA	NA	NA	NA	NA
copper ion binding	NA	2.6 (0.020217)	NA	NA	NA	NA	NA	NA	NA	NA	NA	NA	NA	NA	NA	NA	NA	NA	NA	NA	NA	NA	NA	NA	NA	NA	NA	NA	NA	NA	NA	NA	NA	NA	NA	NA	NA	NA	NA	NA	NA
cristae formation	NA	NA	NA	NA	NA	NA	NA	NA	NA	NA	NA	NA	NA	NA	NA	NA	NA	NA	NA	NA	NA	NA	NA	NA	NA	NA	NA	NA	NA	2.9 (0.034325)	NA	NA	NA	NA	NA	NA	NA	NA	NA	NA	NA
cupric ion binding	NA	NA	NA	NA	NA	NA	NA	NA	NA	NA	NA	NA	6.7 (0.019608)	NA	NA	NA	NA	NA	NA	NA	6.9 (0.019608)	NA	NA	NA	NA	NA	NA	NA	NA	NA	NA	NA	NA	NA	NA	NA	NA	NA	6.1 (0.006536)	NA	NA
cupric reductase activity	NA	NA	NA	NA	NA	NA	NA	NA	NA	NA	NA	NA	NA	NA	NA	NA	NA	NA	NA	NA	NA	NA	NA	NA	NA	NA	NA	6.9 (0.035714)	NA	NA	NA	NA	NA	NA	NA	NA	NA	NA	NA	NA	NA
cyclin binding	NA	NA	NA	NA	NA	NA	NA	NA	NA	NA	NA	NA	NA	NA	NA	NA	NA	NA	NA	NA	NA	NA	NA	NA	16.7 (0.042962)	NA	NA	NA	NA	NA	NA	NA	NA	NA	NA	NA	NA	NA	NA	NA	NA
cytochrome complex	NA	NA	NA	NA	NA	2.2 (0.022214)	NA	4.7 (0)	NA	NA	NA	NA	NA	NA	NA	NA	NA	NA	NA	NA	NA	NA	NA	NA	NA	NA	NA	NA	NA	4.4 (0)	NA	NA	NA	NA	NA	NA	NA	NA	NA	NA	NA
cytoplasmic region	NA	NA	NA	NA	NA	NA	NA	NA	3.8 (0.010661)	NA	NA	NA	NA	NA	NA	NA	NA	NA	NA	NA	NA	NA	NA	NA	NA	NA	NA	NA	NA	NA	NA	NA	NA	NA	NA	NA	NA	NA	NA	NA	NA
cytoskeleton-nuclear membrane anchor activity	NA	NA	NA	NA	NA	NA	NA	NA	NA	NA	NA	NA	NA	NA	4.5 (0.010989)	NA	NA	NA	NA	NA	NA	NA	NA	NA	NA	NA	NA	NA	NA	NA	NA	NA	NA	NA	NA	NA	NA	NA	NA	NA	NA
cytosolic tRNA wobble base thiouridylase complex	NA	NA	NA	NA	NA	NA	NA	NA	NA	NA	NA	NA	NA	NA	NA	NA	NA	NA	NA	NA	7.1 (0.02649)	NA	NA	NA	NA	NA	NA	NA	NA	NA	NA	NA	NA	NA	NA	NA	NA	NA	NA	NA	NA
demethylation	NA	NA	NA	NA	NA	NA	NA	NA	NA	NA	NA	NA	NA	NA	NA	NA	NA	NA	NA	NA	NA	NA	NA	NA	NA	NA	NA	NA	NA	NA	50 (0.020689)	NA	NA	NA	NA	NA	NA	NA	NA	NA	NA
deoxyribonucleoside metabolic process	NA	NA	NA	NA	NA	NA	NA	NA	NA	NA	NA	NA	NA	NA	4.5 (0.033333)	NA	NA	NA	NA	NA	NA	NA	NA	NA	NA	NA	NA	NA	NA	NA	NA	NA	NA	NA	NA	50 (0.033333)	NA	NA	NA	NA	NA
developmental process	NA	NA	NA	NA	NA	NA	2.6 (0)	NA	NA	NA	NA	NA	NA	NA	NA	NA	NA	NA	NA	NA	NA	NA	NA	NA	NA	NA	NA	NA	NA	NA	NA	NA	NA	NA	NA	NA	NA	NA	NA	NA	NA
dicarboxylic acid metabolic process	NA	NA	NA	NA	NA	NA	NA	NA	NA	2.4 (0.038703)	NA	NA	NA	NA	NA	NA	NA	NA	NA	NA	NA	NA	NA	NA	NA	NA	NA	NA	NA	NA	NA	NA	NA	NA	NA	NA	NA	NA	NA	NA	NA
dihydroxy-acid dehydratase activity	NA	NA	NA	NA	NA	NA	NA	NA	NA	NA	NA	NA	NA	NA	NA	NA	NA	NA	NA	NA	NA	NA	NA	NA	NA	NA	NA	NA	NA	NA	NA	NA	NA	NA	NA	NA	NA	NA	NA	NA	4.9 (0.037743)
dioxygenase activity	NA	NA	NA	NA	NA	NA	NA	NA	NA	3.8 (0.044833)	NA	NA	NA	NA	NA	NA	NA	NA	NA	NA	NA	NA	NA	NA	NA	NA	NA	NA	NA	NA	NA	NA	NA	NA	NA	NA	2.6 (0.020636)	NA	NA	NA	NA
diphosphoinositol-polyphosphate diphosphatase activity	NA	NA	NA	NA	NA	NA	NA	NA	NA	NA	NA	4.3 (0.035997)	NA	NA	NA	NA	NA	NA	NA	NA	NA	NA	NA	NA	NA	NA	NA	NA	NA	NA	NA	NA	NA	NA	NA	NA	NA	NA	NA	NA	NA
dolichyl-phosphate beta-D-mannosyltransferase activity	NA	NA	NA	NA	NA	NA	NA	NA	NA	NA	NA	NA	NA	NA	4.5 (0.025)	NA	NA	NA	NA	NA	NA	NA	NA	NA	NA	NA	NA	NA	NA	NA	NA	NA	NA	NA	NA	NA	NA	NA	NA	NA	NA
dynein heavy chain binding	NA	NA	NA	NA	NA	NA	NA	NA	NA	NA	NA	NA	NA	NA	NA	3.6 (0.03804)	NA	NA	NA	NA	NA	NA	NA	NA	NA	NA	NA	NA	NA	NA	NA	NA	NA	NA	NA	NA	NA	NA	NA	NA	NA
dynein light chain binding	NA	NA	NA	NA	NA	NA	NA	NA	NA	NA	NA	NA	NA	NA	NA	7.1 (0.019196)	11.1 (0.041133)	NA	NA	NA	7.1 (0.04936)	NA	NA	NA	NA	NA	NA	NA	NA	NA	NA	NA	NA	NA	NA	NA	NA	NA	NA	NA	NA
efflux transmembrane transporter activity	NA	NA	NA	NA	NA	NA	NA	NA	NA	NA	NA	4.4 (0.036198)	NA	NA	NA	NA	NA	NA	NA	NA	NA	NA	NA	NA	NA	NA	NA	NA	NA	NA	NA	NA	NA	NA	NA	NA	NA	NA	NA	NA	NA
electron transport chain	NA	NA	NA	NA	NA	NA	NA	3.2 (0.001315)	NA	NA	NA	NA	NA	NA	NA	NA	NA	NA	NA	NA	NA	NA	NA	NA	NA	NA	NA	NA	NA	3.1 (0.000537)	NA	NA	NA	NA	NA	NA	NA	NA	NA	NA	NA
endodeoxyribonuclease complex	NA	NA	20 (0.014684)	NA	NA	NA	NA	NA	NA	NA	NA	NA	NA	NA	NA	NA	NA	NA	NA	NA	NA	NA	NA	NA	NA	NA	NA	NA	NA	NA	NA	NA	NA	NA	NA	NA	NA	6.2 (0.017608)	NA	20 (0.002946)	NA
endopeptidase activity	NA	NA	NA	NA	NA	NA	2.4 (0.00357)	NA	NA	NA	NA	NA	NA	NA	NA	NA	NA	NA	NA	NA	NA	NA	NA	NA	NA	NA	NA	NA	NA	NA	NA	NA	NA	NA	NA	NA	NA	NA	NA	NA	NA
endoplasmic reticulum organization	NA	NA	2.1 (0.039161)	NA	NA	NA	NA	NA	NA	NA	NA	NA	NA	NA	NA	NA	NA	NA	NA	NA	NA	NA	NA	NA	NA	NA	NA	NA	NA	NA	NA	NA	NA	NA	NA	NA	NA	NA	NA	NA	NA
energy coupled proton transport, down electrochemical gradient	NA	NA	NA	NA	NA	NA	NA	2.9 (0.021505)	NA	NA	NA	NA	NA	NA	NA	NA	NA	NA	NA	NA	NA	NA	NA	NA	NA	NA	NA	NA	NA	3.8 (0)	NA	NA	NA	NA	NA	NA	NA	NA	NA	NA	NA
energy derivation by oxidation of organic compounds	NA	NA	NA	NA	NA	NA	NA	NA	NA	NA	NA	NA	NA	NA	NA	NA	NA	NA	NA	NA	NA	NA	NA	NA	NA	NA	NA	NA	NA	2.2 (0.00457)	NA	NA	NA	NA	NA	NA	NA	NA	NA	NA	NA
energy reserve metabolic process	NA	NA	NA	NA	NA	NA	NA	NA	NA	NA	NA	NA	NA	NA	NA	NA	2.7 (0.013704)	NA	NA	NA	NA	NA	NA	NA	NA	NA	NA	NA	NA	NA	NA	NA	NA	NA	NA	NA	NA	NA	NA	NA	NA
erythrose 4-phosphate/phosphoenolpyruvate family amino acid metabolic process	NA	NA	NA	4.1 (0.009084)	NA	NA	6.7 (0.031261)	NA	NA	NA	3.2 (0.021399)	NA	NA	NA	NA	NA	NA	NA	NA	NA	NA	8.3 (0.000859)	NA	22.2 (0.021399)	NA	3.8 (0.042622)	NA	NA	NA	NA	100 (0.013183)	NA	NA	NA	NA	NA	NA	NA	NA	10 (0.006767)	NA
ethanol metabolic process	NA	NA	NA	NA	NA	NA	NA	NA	NA	NA	NA	NA	NA	NA	NA	NA	NA	NA	NA	NA	NA	NA	NA	NA	NA	NA	NA	NA	NA	2.9 (0.028846)	NA	NA	NA	NA	NA	NA	NA	NA	NA	NA	NA
ether metabolic process	NA	NA	10 (0.022392)	NA	NA	NA	NA	NA	NA	NA	3.2 (0.038938)	NA	NA	NA	NA	NA	NA	NA	NA	NA	3.5 (0.028711)	NA	NA	NA	NA	NA	NA	NA	2.2 (0.049852)	NA	NA	NA	NA	NA	NA	NA	NA	NA	NA	NA	NA
eukaryotic translation initiation factor 4F complex assembly	NA	NA	NA	NA	5.9 (0.030797)	10 (0.015459)	NA	NA	NA	NA	NA	NA	NA	NA	NA	NA	NA	NA	NA	NA	NA	NA	NA	NA	NA	NA	NA	NA	NA	NA	NA	NA	NA	NA	NA	NA	NA	NA	NA	NA	NA
external encapsulating structure	NA	NA	NA	NA	NA	NA	3.1 (1.9e-05)	NA	NA	NA	NA	NA	NA	NA	NA	NA	2.8 (0)	NA	NA	NA	NA	NA	NA	4.1 (0.017473)	NA	NA	NA	2.3 (0)	NA	NA	NA	NA	NA	NA	NA	NA	NA	NA	NA	NA	NA
external encapsulating structure organization	NA	NA	NA	NA	NA	NA	2.9 (0)	NA	NA	NA	NA	NA	NA	NA	NA	NA	NA	NA	2.5 (0.005941)	NA	NA	NA	NA	NA	NA	NA	NA	NA	NA	NA	NA	NA	NA	NA	NA	NA	NA	NA	NA	NA	NA
extracellular region	NA	NA	NA	NA	NA	NA	2.7 (0.000533)	NA	NA	2.2 (0.000103)	NA	NA	NA	2.2 (0.018725)	NA	NA	2.8 (0)	2.3 (0.000104)	NA	2.6 (0.000299)	NA	NA	2.3 (0.009426)	5.9 (8.2e-05)	NA	NA	2.1 (0)	2.1 (0)	NA	NA	NA	NA	NA	NA	NA	2.2 (0.042714)	NA	NA	NA	NA	NA
fatty acid elongase activity	NA	NA	NA	NA	NA	NA	NA	NA	NA	NA	NA	NA	NA	NA	NA	NA	NA	NA	NA	NA	NA	NA	NA	NA	NA	NA	NA	6.9 (0.047619)	NA	NA	NA	NA	NA	NA	NA	NA	NA	NA	NA	NA	NA
fermentation	NA	NA	NA	NA	NA	NA	NA	NA	NA	2.5 (0.040885)	NA	NA	NA	NA	NA	NA	NA	NA	NA	NA	NA	NA	NA	NA	NA	NA	NA	NA	NA	NA	NA	NA	NA	NA	NA	NA	NA	NA	NA	NA	NA
ferroxidase complex	NA	NA	NA	NA	NA	NA	NA	NA	NA	NA	NA	NA	NA	NA	NA	NA	NA	NA	NA	14.3 (0.008097)	NA	NA	NA	NA	NA	NA	NA	NA	NA	NA	NA	NA	NA	NA	NA	NA	NA	NA	NA	NA	NA
flavin adenine dinucleotide binding	NA	NA	NA	NA	NA	NA	3.2 (0.002523)	NA	NA	NA	NA	NA	NA	NA	NA	NA	NA	NA	NA	NA	NA	NA	3.6 (0.008133)	NA	NA	NA	NA	NA	NA	NA	NA	NA	NA	NA	NA	NA	NA	NA	NA	NA	NA
fluid transport	NA	NA	NA	NA	NA	NA	NA	NA	NA	NA	NA	5.9 (0.00601)	NA	NA	NA	NA	NA	NA	NA	NA	NA	7.7 (0.032836)	NA	33.3 (0.030514)	NA	NA	5.4 (0.013387)	NA	NA	NA	NA	NA	7.1 (0.037467)	NA	2.1 (0.046685)	NA	NA	NA	NA	NA	NA
fructan metabolic process	NA	NA	NA	NA	NA	NA	NA	NA	NA	NA	NA	NA	NA	NA	NA	NA	NA	NA	NA	NA	NA	NA	50 (0.035088)	NA	NA	NA	NA	NA	NA	NA	NA	NA	NA	NA	NA	NA	NA	NA	NA	NA	NA
fructose 1,6-bisphosphate metabolic process	NA	NA	NA	NA	NA	NA	NA	NA	NA	NA	NA	NA	NA	NA	NA	NA	NA	NA	NA	NA	NA	7.7 (0.027906)	NA	NA	NA	NA	NA	NA	NA	NA	NA	NA	NA	NA	NA	NA	NA	NA	NA	NA	NA
fructose 6-phosphate metabolic process	NA	NA	NA	NA	NA	NA	NA	NA	NA	NA	NA	NA	NA	NA	NA	NA	NA	NA	NA	NA	NA	5.6 (0.03712)	NA	NA	NA	NA	NA	NA	NA	NA	NA	NA	NA	NA	NA	NA	NA	NA	NA	NA	NA
galacturonan metabolic process	NA	NA	NA	NA	NA	NA	NA	NA	NA	NA	12.5 (0.015385)	NA	NA	NA	NA	NA	NA	25 (0.030769)	NA	33.3 (0.015385)	NA	25 (0.030769)	50 (0.046154)	100 (0.015385)	NA	NA	NA	NA	9.1 (0.015385)	NA	NA	20 (0.015385)	NA	NA	6.2 (0.015385)	NA	NA	12.5 (0.046154)	NA	NA	NA
gamma-aminobutyric acid transport	NA	NA	NA	NA	NA	NA	NA	NA	NA	NA	NA	NA	NA	NA	NA	NA	NA	NA	NA	NA	NA	NA	NA	NA	NA	NA	NA	NA	8.7 (0.007389)	NA	NA	NA	NA	NA	NA	NA	NA	NA	NA	NA	NA
gene silencing by RNA	NA	NA	NA	NA	NA	NA	NA	NA	NA	2.6 (0.000292)	NA	NA	NA	NA	NA	NA	NA	NA	NA	NA	NA	NA	NA	NA	NA	NA	NA	NA	NA	NA	NA	NA	NA	NA	NA	NA	NA	NA	NA	NA	NA
general transcription initiation factor activity	NA	NA	2.4 (0.00267)	NA	NA	NA	NA	NA	NA	NA	NA	NA	NA	NA	NA	NA	NA	NA	NA	NA	NA	NA	NA	NA	NA	NA	NA	NA	NA	NA	NA	NA	NA	NA	NA	NA	NA	NA	NA	NA	NA
generation of precursor metabolites and energy	NA	NA	NA	NA	NA	NA	2.1 (2.4e-05)	NA	NA	NA	NA	NA	NA	NA	NA	NA	NA	NA	NA	NA	NA	NA	NA	NA	NA	NA	NA	NA	NA	NA	NA	NA	NA	NA	NA	NA	NA	NA	NA	NA	NA
global genome nucleotide-excision repair	NA	NA	NA	NA	NA	NA	NA	NA	NA	NA	NA	NA	NA	NA	NA	NA	NA	NA	NA	NA	NA	NA	NA	NA	NA	NA	4.7 (0.000321)	3 (0.041526)	NA	NA	NA	NA	NA	NA	NA	NA	NA	NA	NA	NA	NA
glucanosyltransferase activity	NA	NA	NA	3.1 (0.016457)	3.4 (0.017571)	NA	NA	NA	NA	NA	NA	NA	NA	NA	NA	NA	NA	NA	NA	NA	NA	NA	NA	NA	NA	NA	NA	3 (0.008601)	NA	NA	NA	NA	NA	NA	NA	NA	NA	NA	NA	NA	NA
gluconokinase activity	NA	NA	NA	NA	NA	NA	NA	NA	NA	16.7 (0.020576)	NA	NA	NA	NA	NA	NA	NA	NA	NA	NA	NA	NA	NA	NA	NA	NA	NA	NA	NA	NA	NA	NA	NA	NA	6.2 (0.012346)	NA	NA	NA	NA	NA	NA
gluconolactonase activity	NA	NA	NA	NA	NA	NA	NA	NA	NA	NA	NA	NA	NA	NA	NA	NA	NA	NA	NA	NA	NA	NA	NA	NA	NA	NA	NA	NA	NA	2.2 (0.018221)	NA	NA	NA	NA	NA	NA	NA	NA	NA	NA	NA
glucosamine 6-phosphate N-acetyltransferase activity	NA	NA	NA	NA	NA	NA	NA	NA	NA	NA	NA	NA	NA	NA	4.5 (0.02381)	NA	NA	NA	NA	NA	NA	NA	NA	NA	NA	NA	NA	NA	NA	NA	NA	NA	NA	NA	NA	NA	NA	NA	NA	NA	NA
glucose 6-phosphate metabolic process	NA	NA	NA	NA	NA	NA	NA	NA	NA	NA	NA	NA	NA	NA	NA	NA	3.4 (0.012713)	NA	NA	NA	NA	NA	NA	NA	NA	NA	NA	NA	NA	NA	NA	NA	NA	NA	NA	NA	NA	NA	NA	NA	NA
glucose binding	NA	NA	NA	NA	NA	NA	NA	NA	NA	NA	NA	NA	NA	NA	NA	NA	NA	NA	NA	NA	NA	NA	NA	NA	NA	NA	NA	NA	NA	3.1 (0.021978)	NA	NA	NA	NA	NA	NA	NA	NA	NA	NA	NA
glucosyltransferase activity	NA	NA	NA	NA	NA	NA	NA	NA	NA	NA	NA	NA	NA	NA	NA	NA	3.3 (0.041076)	NA	NA	NA	NA	NA	NA	NA	NA	3.3 (0.021494)	NA	NA	NA	NA	NA	NA	NA	NA	NA	NA	NA	NA	NA	NA	NA
glutamate N-acetyltransferase activity	20 (0.02381)	NA	NA	NA	NA	NA	NA	NA	NA	NA	NA	NA	NA	NA	NA	NA	11.1 (0.047619)	NA	NA	NA	NA	NA	NA	NA	NA	NA	NA	7.1 (0.02381)	NA	NA	NA	NA	NA	NA	NA	NA	NA	NA	NA	NA	NA
glutaminase complex	20 (0.011782)	25 (0.023564)	NA	11.1 (0.022091)	NA	NA	25 (0.010309)	NA	NA	16.7 (0.025037)	NA	9.1 (0.035346)	6.7 (0.048601)	50 (0.002946)	NA	NA	NA	25 (0.010309)	NA	NA	NA	NA	NA	NA	NA	NA	8.3 (0.047128)	NA	9.1 (0.013255)	NA	NA	NA	NA	NA	6.2 (0.005891)	NA	NA	NA	NA	NA	10 (0.038292)
glutamine family amino acid metabolic process	2.7 (0.026437)	NA	NA	NA	NA	NA	NA	NA	NA	NA	NA	NA	NA	NA	NA	NA	NA	NA	NA	NA	NA	NA	NA	NA	NA	NA	NA	NA	NA	NA	NA	NA	NA	NA	NA	NA	NA	NA	NA	NA	NA
glutamine-tRNA ligase activity	NA	NA	NA	NA	NA	NA	NA	NA	NA	NA	NA	NA	NA	NA	4.5 (0.028571)	NA	NA	NA	NA	NA	NA	NA	NA	NA	NA	NA	NA	NA	NA	NA	NA	NA	NA	NA	NA	NA	NA	NA	NA	NA	NA
glutaminyl-tRNA aminoacylation	NA	NA	NA	NA	NA	NA	NA	NA	NA	NA	NA	NA	NA	NA	4.5 (0.028571)	NA	NA	NA	NA	NA	NA	NA	NA	NA	NA	NA	NA	NA	NA	NA	NA	NA	NA	NA	NA	NA	NA	NA	NA	NA	NA
glutathione transferase activity	NA	NA	NA	NA	NA	NA	NA	NA	NA	NA	NA	NA	NA	NA	NA	NA	NA	NA	NA	NA	NA	NA	NA	NA	NA	NA	NA	NA	NA	2.2 (0.010493)	NA	NA	NA	NA	NA	NA	NA	NA	NA	NA	2.8 (0.023256)
glyceraldehyde-3-phosphate dehydrogenase (NAD(P)+) (phosphorylating) activity	NA	NA	NA	NA	NA	NA	NA	NA	NA	NA	NA	NA	NA	NA	NA	NA	4.8 (0.039484)	NA	NA	NA	NA	NA	NA	NA	NA	NA	NA	NA	NA	NA	NA	NA	NA	NA	NA	NA	NA	NA	NA	NA	NA
glycerol-1-phosphatase activity	NA	NA	NA	NA	NA	NA	NA	NA	NA	NA	NA	NA	NA	NA	3 (0.018836)	NA	NA	NA	NA	NA	NA	NA	14.3 (0.021127)	NA	NA	NA	NA	NA	NA	NA	NA	NA	NA	NA	NA	NA	NA	NA	NA	NA	NA
glycine cleavage complex	NA	NA	NA	NA	NA	NA	NA	NA	NA	NA	NA	NA	NA	NA	NA	4.8 (0.004505)	NA	NA	NA	NA	NA	NA	NA	NA	NA	10.5 (0.013256)	NA	NA	NA	NA	NA	NA	NA	NA	NA	NA	NA	NA	NA	NA	NA
glycine metabolic process	NA	NA	NA	NA	NA	NA	NA	NA	NA	NA	NA	NA	NA	NA	NA	3.1 (0.005348)	NA	NA	NA	NA	NA	NA	NA	NA	NA	8.9 (0.000668)	NA	NA	NA	3 (0.018261)	NA	NA	NA	NA	NA	NA	NA	NA	NA	NA	NA
glycogen (starch) synthase activity	NA	NA	NA	NA	NA	NA	NA	NA	NA	NA	NA	NA	NA	NA	NA	NA	NA	NA	NA	NA	6.9 (0.018182)	NA	NA	NA	NA	NA	NA	NA	NA	NA	NA	NA	NA	NA	NA	NA	NA	NA	NA	NA	NA
glycoside transport	NA	NA	NA	NA	NA	NA	NA	NA	NA	NA	NA	NA	NA	NA	NA	NA	NA	NA	NA	NA	6.9 (0.006645)	NA	NA	NA	NA	7.7 (0.046512)	NA	NA	NA	5.3 (0.049834)	NA	NA	NA	NA	NA	NA	NA	NA	NA	NA	NA
growth	NA	NA	NA	NA	NA	NA	NA	NA	NA	NA	NA	NA	NA	NA	NA	NA	NA	NA	2.4 (0.032663)	NA	NA	NA	NA	NA	11.1 (0.033535)	NA	NA	NA	NA	NA	NA	NA	NA	NA	NA	NA	NA	NA	NA	NA	NA
guanine nucleotide transport	NA	NA	NA	NA	NA	NA	NA	NA	NA	NA	NA	NA	NA	NA	NA	NA	NA	NA	NA	NA	NA	NA	NA	NA	NA	NA	8.3 (0.035714)	NA	NA	NA	NA	NA	NA	NA	NA	NA	NA	NA	NA	NA	NA
heat acclimation	NA	NA	NA	NA	NA	NA	NA	12.5 (0.009498)	16.7 (0.006784)	NA	NA	NA	6.7 (0.009498)	NA	NA	NA	NA	NA	NA	NA	NA	NA	NA	NA	NA	NA	NA	NA	NA	NA	NA	NA	NA	NA	NA	NA	NA	NA	NA	NA	10 (0.016282)
hexokinase activity	NA	NA	NA	NA	NA	NA	NA	NA	NA	NA	NA	NA	NA	NA	NA	NA	7.7 (0.032967)	NA	NA	NA	NA	NA	NA	NA	NA	NA	NA	NA	NA	NA	NA	NA	NA	NA	NA	NA	NA	NA	NA	NA	NA
histone H2A-H2B dimer displacement	NA	NA	NA	NA	NA	NA	NA	NA	NA	NA	NA	NA	NA	NA	NA	NA	NA	NA	NA	NA	NA	NA	NA	NA	NA	NA	8.3 (0.043478)	7.1 (0.043478)	NA	NA	NA	NA	NA	NA	NA	NA	NA	NA	NA	NA	NA
histone H3-K36 methylation	NA	NA	NA	NA	NA	NA	NA	NA	13.5 (0.001189)	NA	NA	NA	NA	NA	NA	NA	NA	NA	NA	NA	NA	NA	NA	NA	NA	NA	NA	NA	NA	NA	NA	NA	NA	NA	NA	NA	NA	NA	NA	NA	NA
histone H3-K79 methylation	NA	NA	NA	NA	NA	NA	NA	NA	NA	NA	NA	NA	NA	NA	NA	NA	NA	NA	NA	NA	NA	NA	NA	NA	NA	NA	NA	3.5 (0.003419)	NA	NA	NA	NA	NA	NA	NA	NA	NA	NA	NA	NA	NA
histone H3-K9 modification	NA	NA	NA	NA	NA	NA	NA	NA	NA	NA	3.2 (0.027586)	NA	NA	NA	NA	NA	NA	NA	NA	NA	NA	NA	NA	NA	NA	NA	NA	NA	NA	NA	NA	NA	NA	NA	NA	NA	NA	NA	NA	NA	NA
holo-[acyl-carrier-protein] biosynthetic process	NA	NA	NA	NA	NA	NA	NA	NA	NA	NA	NA	NA	NA	NA	NA	NA	NA	NA	NA	NA	NA	NA	NA	NA	NA	NA	NA	NA	NA	NA	NA	NA	NA	NA	NA	NA	NA	NA	5.9 (0.044586)	NA	NA
homologous recombination	NA	NA	NA	NA	NA	NA	NA	NA	NA	NA	NA	NA	NA	NA	NA	NA	NA	NA	NA	NA	NA	NA	2.9 (0.040099)	NA	NA	NA	NA	NA	NA	NA	NA	NA	NA	NA	NA	NA	NA	NA	NA	NA	NA
host cellular component	NA	NA	NA	NA	NA	NA	NA	NA	NA	NA	NA	NA	NA	NA	NA	2.4 (0.034423)	NA	NA	NA	NA	NA	NA	NA	NA	NA	NA	NA	NA	NA	NA	NA	NA	NA	NA	NA	NA	NA	NA	NA	NA	NA
hydrolase activity, acting on acid carbon-carbon bonds	NA	NA	NA	NA	NA	NA	NA	NA	NA	NA	NA	NA	NA	NA	NA	NA	NA	NA	NA	14.3 (0.030907)	NA	NA	NA	50 (0.010964)	NA	NA	NA	NA	NA	NA	NA	NA	NA	NA	NA	NA	NA	6.2 (0.043493)	NA	NA	NA
hydrolase activity, acting on carbon-nitrogen (but not peptide) bonds, in cyclic amides	7.7 (0.03374)	NA	NA	NA	NA	NA	NA	NA	NA	NA	NA	NA	NA	NA	NA	NA	NA	NA	NA	NA	NA	NA	NA	NA	NA	NA	NA	NA	NA	NA	NA	NA	NA	NA	NA	NA	NA	NA	NA	NA	NA
hydrolase activity, acting on carbon-nitrogen (but not peptide) bonds, in linear amidines	NA	NA	NA	NA	NA	NA	NA	NA	NA	NA	NA	NA	4.3 (0.01063)	NA	NA	NA	NA	NA	NA	NA	NA	NA	NA	NA	NA	NA	NA	NA	NA	NA	NA	NA	NA	NA	NA	NA	NA	NA	NA	NA	NA
hydrolase activity, acting on ether bonds	6.2 (0.046022)	NA	NA	NA	NA	7.1 (0.040682)	NA	NA	NA	NA	4.3 (0.016408)	NA	NA	NA	NA	NA	NA	NA	NA	NA	NA	NA	NA	NA	NA	NA	NA	NA	2.9 (0.027246)	NA	NA	NA	7.1 (0.024544)	NA	2.1 (0.029944)	NA	NA	NA	NA	NA	NA
hydrolase activity, acting on glycosyl bonds	NA	NA	NA	NA	NA	NA	NA	NA	NA	NA	NA	NA	NA	NA	NA	NA	NA	NA	2.4 (0.044872)	NA	NA	NA	3.3 (0.000938)	3.6 (0.026366)	NA	NA	NA	NA	NA	NA	NA	NA	NA	NA	NA	NA	NA	NA	NA	NA	NA
hydroxymethyl-, formyl- and related transferase activity	NA	NA	NA	NA	NA	NA	NA	NA	NA	4.8 (0.047127)	NA	NA	NA	NA	NA	NA	NA	NA	NA	NA	NA	NA	NA	NA	NA	4.4 (0.003568)	NA	NA	NA	NA	NA	NA	NA	5.7 (0.003568)	NA	NA	NA	NA	NA	11.1 (0.003568)	NA
hydroxymethylpyrimidine kinase activity	NA	NA	NA	NA	NA	NA	NA	NA	NA	16.7 (0.020576)	NA	9.1 (0.032922)	NA	NA	NA	NA	NA	NA	NA	NA	NA	NA	NA	NA	NA	NA	8.3 (0.045267)	NA	NA	NA	NA	NA	NA	NA	NA	NA	NA	NA	NA	NA	NA
identical protein binding	NA	NA	NA	NA	NA	NA	NA	NA	NA	2.5 (0.047016)	NA	NA	NA	NA	NA	NA	NA	NA	NA	NA	NA	NA	NA	NA	NA	NA	NA	NA	NA	NA	NA	NA	NA	NA	NA	NA	NA	NA	NA	NA	NA
import across plasma membrane	NA	NA	NA	NA	NA	NA	NA	NA	NA	NA	NA	NA	NA	NA	NA	NA	NA	NA	NA	NA	NA	NA	NA	NA	100 (0.002701)	NA	NA	NA	NA	NA	NA	NA	NA	NA	NA	NA	NA	NA	NA	NA	NA
import into cell	NA	NA	NA	NA	NA	NA	NA	NA	NA	NA	NA	NA	NA	NA	NA	NA	NA	NA	NA	NA	NA	NA	NA	NA	50 (0.009819)	NA	NA	NA	NA	NA	NA	NA	NA	NA	NA	NA	NA	NA	NA	NA	NA
indole-containing compound metabolic process	2.6 (0.020447)	NA	NA	3.6 (2.2e-05)	3.1 (0.000142)	5.6 (0.000142)	NA	NA	NA	5.5 (3.5e-05)	2.6 (0.000112)	NA	NA	NA	NA	NA	NA	NA	NA	3.8 (0.009071)	NA	3 (0.00335)	5.4 (0.011533)	11.8 (0.001028)	50 (0.038164)	NA	NA	NA	NA	NA	NA	NA	2.8 (0.00688)	NA	NA	8.7 (0.00497)	2.3 (0.035555)	NA	NA	NA	NA
indoleacetamide hydrolase activity	NA	NA	NA	NA	NA	NA	NA	NA	NA	NA	NA	NA	NA	NA	NA	NA	NA	NA	NA	33.3 (0.033333)	NA	NA	NA	NA	NA	NA	NA	NA	NA	NA	NA	NA	NA	NA	NA	NA	NA	NA	NA	NA	NA
indolepyruvate decarboxylase activity	NA	NA	NA	5.4 (0.023715)	NA	NA	NA	NA	NA	NA	6.5 (0.023715)	NA	NA	NA	NA	NA	NA	NA	NA	NA	NA	11.1 (0.023715)	NA	NA	NA	NA	NA	NA	NA	NA	NA	NA	NA	NA	NA	NA	NA	NA	NA	NA	NA
inorganic anion transport	NA	NA	NA	NA	NA	NA	NA	NA	NA	NA	NA	NA	NA	NA	NA	NA	NA	NA	NA	NA	NA	NA	NA	NA	NA	NA	NA	NA	NA	NA	NA	2.1 (0.036948)	NA	NA	NA	NA	NA	NA	NA	NA	NA
intermediate filament cytoskeleton	NA	NA	NA	NA	NA	NA	NA	NA	NA	NA	NA	NA	NA	NA	4.5 (0.029915)	NA	NA	NA	NA	NA	NA	NA	NA	NA	NA	NA	NA	NA	NA	NA	NA	NA	NA	NA	NA	NA	NA	NA	NA	NA	NA
intracellular immature spore	NA	NA	NA	NA	NA	3.6 (0)	3.8 (0.000103)	NA	NA	NA	NA	NA	NA	2.6 (0.026587)	NA	NA	NA	NA	NA	2.5 (0.004536)	NA	NA	NA	NA	NA	NA	NA	NA	NA	NA	NA	NA	NA	NA	NA	NA	NA	2.2 (0)	NA	NA	NA
intraciliary transport particle	NA	NA	NA	NA	NA	NA	NA	NA	NA	NA	NA	NA	NA	NA	NA	3.6 (0.015822)	5.9 (0.048056)	NA	NA	NA	NA	NA	NA	NA	NA	NA	NA	NA	NA	NA	NA	NA	NA	NA	NA	NA	NA	NA	NA	NA	NA
intramolecular transferase activity, phosphotransferases	NA	NA	NA	NA	NA	NA	NA	NA	NA	NA	NA	NA	NA	NA	NA	NA	3.3 (0.035192)	NA	NA	NA	NA	NA	NA	NA	NA	NA	NA	NA	NA	NA	NA	NA	NA	NA	NA	NA	NA	NA	NA	NA	NA
intrinsic component of plasma membrane	NA	NA	NA	NA	NA	NA	NA	NA	NA	2.2 (0.038215)	NA	NA	NA	NA	NA	NA	NA	NA	NA	NA	NA	NA	3.1 (0.006223)	NA	33.3 (0.015702)	NA	NA	NA	NA	NA	NA	NA	NA	NA	NA	NA	NA	NA	NA	NA	NA
ion transport	NA	NA	NA	NA	NA	NA	NA	NA	NA	NA	NA	NA	NA	NA	NA	NA	NA	NA	2.3 (0.00951)	NA	NA	NA	NA	NA	NA	NA	NA	NA	NA	NA	NA	NA	NA	NA	NA	NA	NA	NA	NA	NA	NA
iron ion binding	NA	NA	NA	NA	NA	NA	NA	NA	NA	NA	NA	NA	NA	NA	NA	NA	3 (0.016688)	NA	NA	NA	NA	NA	NA	NA	NA	NA	NA	NA	NA	NA	NA	NA	NA	NA	NA	NA	NA	NA	NA	NA	NA
iron ion homeostasis	NA	NA	NA	NA	NA	NA	NA	NA	NA	NA	NA	NA	NA	NA	NA	NA	NA	NA	NA	3.7 (0.039101)	NA	NA	NA	NA	NA	NA	NA	NA	NA	NA	NA	NA	NA	NA	NA	NA	NA	NA	NA	NA	NA
iron ion transport	NA	NA	NA	NA	NA	NA	NA	NA	NA	NA	NA	NA	NA	NA	NA	NA	2.4 (0.023196)	NA	NA	5.9 (0.023196)	NA	NA	NA	NA	NA	NA	NA	NA	NA	NA	NA	NA	NA	NA	NA	NA	NA	NA	NA	NA	NA
isocitrate dehydrogenase activity	NA	NA	NA	NA	NA	NA	NA	NA	NA	NA	NA	NA	3.9 (0.011363)	NA	NA	NA	NA	NA	NA	NA	NA	NA	NA	NA	NA	NA	NA	NA	NA	NA	NA	NA	NA	NA	NA	NA	NA	NA	NA	NA	NA
karyogamy	NA	NA	NA	NA	NA	NA	NA	3.7 (0.030729)	NA	NA	NA	NA	NA	NA	NA	NA	NA	NA	NA	NA	NA	NA	NA	NA	NA	NA	NA	NA	NA	NA	NA	NA	NA	NA	NA	NA	NA	NA	NA	NA	NA
ketol-acid reductoisomerase activity	NA	NA	NA	NA	NA	NA	NA	NA	NA	NA	NA	NA	NA	NA	NA	NA	NA	NA	NA	NA	NA	NA	NA	NA	NA	NA	4.1 (0.014664)	NA	NA	NA	NA	NA	NA	NA	NA	NA	NA	NA	NA	NA	4.9 (0.014664)
lactate dehydrogenase activity	NA	NA	NA	NA	NA	NA	NA	NA	NA	NA	NA	NA	NA	NA	NA	NA	5.7 (0.049002)	NA	NA	NA	NA	NA	NA	NA	NA	NA	NA	NA	NA	NA	NA	NA	NA	NA	NA	NA	NA	NA	NA	NA	NA
leucine metabolic process	NA	NA	NA	NA	NA	NA	NA	NA	NA	NA	NA	NA	NA	NA	NA	NA	NA	NA	NA	NA	NA	NA	NA	NA	NA	NA	NA	NA	NA	3.1 (0.028329)	NA	NA	NA	NA	NA	NA	NA	NA	NA	NA	NA
lipid homeostasis	NA	NA	NA	NA	NA	NA	2.5 (0.027927)	NA	NA	NA	NA	NA	NA	NA	NA	NA	NA	NA	NA	NA	NA	NA	NA	NA	NA	NA	NA	NA	NA	NA	NA	NA	NA	NA	NA	NA	NA	NA	NA	NA	NA
lipid localization	NA	NA	NA	NA	NA	NA	NA	NA	NA	NA	NA	NA	NA	NA	NA	NA	NA	NA	3.1 (0.038934)	NA	NA	NA	NA	NA	NA	NA	NA	NA	NA	NA	NA	NA	NA	NA	NA	NA	NA	NA	NA	NA	NA
lipoprotein metabolic process	NA	NA	NA	NA	NA	NA	NA	NA	NA	NA	NA	NA	NA	NA	NA	NA	NA	NA	NA	NA	NA	NA	NA	NA	NA	NA	NA	NA	NA	NA	NA	NA	NA	NA	NA	2.7 (0.023837)	NA	NA	NA	NA	NA
lipoyl(octanoyl) transferase activity	NA	NA	NA	NA	12.5 (0.026316)	20 (0.026316)	NA	NA	NA	NA	NA	NA	NA	NA	NA	NA	NA	NA	NA	NA	NA	NA	NA	NA	NA	NA	NA	NA	NA	NA	NA	NA	NA	NA	NA	NA	NA	NA	NA	NA	10 (0.026316)
localization	NA	NA	NA	NA	NA	NA	NA	NA	NA	NA	NA	NA	NA	NA	NA	NA	NA	NA	NA	NA	NA	NA	NA	NA	3.3 (0.045527)	NA	NA	NA	NA	NA	NA	NA	NA	NA	NA	NA	NA	NA	NA	NA	NA
lyase activity	NA	NA	NA	NA	NA	NA	2.1 (0.00239)	NA	NA	NA	NA	NA	NA	NA	NA	NA	NA	NA	NA	NA	NA	NA	NA	NA	NA	NA	NA	NA	NA	NA	NA	NA	NA	NA	NA	NA	NA	NA	NA	NA	NA
lysophosphatidic acid phosphatase activity	NA	NA	NA	NA	NA	NA	25 (0.035211)	NA	16.7 (0.028169)	NA	NA	NA	NA	NA	NA	NA	NA	25 (0.049296)	NA	NA	NA	NA	NA	NA	NA	NA	NA	7.1 (0.049296)	NA	NA	NA	NA	NA	NA	NA	NA	16.7 (0.021127)	NA	NA	NA	NA
lysophospholipid acyltransferase activity	NA	NA	NA	NA	NA	NA	NA	NA	NA	NA	NA	NA	NA	NA	NA	NA	NA	NA	NA	NA	NA	NA	NA	NA	NA	NA	NA	2.3 (0.019982)	NA	NA	NA	NA	NA	NA	NA	NA	NA	NA	NA	NA	NA
lytic vacuole	NA	NA	NA	NA	NA	NA	NA	NA	NA	NA	NA	NA	NA	NA	NA	NA	NA	NA	NA	NA	NA	NA	NA	2.3 (0.020984)	NA	NA	NA	NA	NA	NA	NA	NA	NA	NA	NA	NA	NA	NA	NA	NA	NA
m7G(5')pppN diphosphatase activity	NA	NA	NA	NA	NA	NA	NA	NA	NA	NA	NA	NA	NA	NA	NA	NA	5.7 (0.0037)	NA	NA	NA	NA	NA	NA	NA	NA	NA	NA	NA	NA	NA	NA	NA	NA	NA	NA	NA	NA	NA	NA	NA	NA
mRNA 3'-UTR binding	NA	NA	NA	NA	2.2 (0.026449)	3.8 (0.016379)	NA	NA	NA	NA	NA	NA	NA	NA	NA	NA	NA	NA	NA	NA	NA	NA	NA	NA	NA	NA	NA	NA	NA	NA	NA	NA	NA	NA	NA	NA	NA	NA	NA	NA	NA
mRNA cis splicing, via spliceosome	NA	6.3 (0.022721)	NA	NA	NA	NA	NA	NA	NA	NA	NA	NA	NA	NA	NA	NA	NA	NA	NA	NA	NA	NA	NA	NA	NA	NA	NA	NA	NA	NA	NA	NA	NA	NA	NA	NA	NA	NA	NA	NA	NA
mRNA editing complex	NA	NA	NA	NA	4 (0.044025)	7.1 (0.036779)	NA	8.3 (0.001642)	NA	NA	4.3 (0.005946)	NA	NA	NA	NA	NA	NA	NA	NA	NA	NA	NA	NA	NA	NA	NA	NA	NA	2.9 (0.032414)	NA	NA	NA	NA	NA	2.1 (0.008911)	NA	NA	4.2 (0.035325)	NA	NA	NA
mRNA localization resulting in posttranscriptional regulation of gene expression	NA	NA	NA	11.1 (0.012821)	11.8 (0.012821)	20 (0.012821)	NA	NA	NA	NA	NA	NA	NA	NA	NA	NA	NA	NA	NA	NA	NA	NA	NA	NA	NA	NA	NA	6.9 (0.012821)	NA	NA	NA	NA	NA	NA	NA	NA	NA	NA	NA	NA	NA
maintenance of transcriptional fidelity during DNA-templated transcription elongation	NA	NA	NA	NA	NA	NA	NA	NA	NA	NA	NA	NA	3.3 (0.019802)	25 (0.019802)	NA	NA	NA	NA	NA	NA	NA	NA	NA	NA	NA	NA	NA	NA	NA	NA	NA	NA	NA	NA	NA	NA	NA	NA	NA	NA	NA
maintenance of translational fidelity	NA	NA	NA	NA	NA	NA	NA	NA	NA	NA	NA	NA	NA	10 (0.049594)	NA	NA	NA	NA	NA	NA	NA	NA	NA	NA	NA	NA	NA	NA	NA	NA	NA	NA	NA	NA	NA	NA	NA	NA	NA	NA	NA
mannitol 2-dehydrogenase activity	NA	NA	NA	NA	NA	NA	25 (0.027027)	NA	NA	NA	NA	NA	NA	NA	NA	NA	NA	NA	NA	33.3 (0.040541)	NA	NA	NA	NA	NA	NA	NA	NA	NA	NA	NA	NA	NA	NA	NA	NA	NA	NA	NA	NA	NA
mannose metabolic process	NA	NA	NA	NA	NA	NA	NA	NA	NA	NA	NA	NA	NA	NA	NA	NA	NA	NA	NA	NA	NA	NA	NA	NA	NA	NA	NA	NA	2.9 (0.039474)	NA	NA	NA	7.1 (0.039474)	NA	NA	NA	NA	NA	NA	NA	NA
mating	NA	NA	NA	NA	NA	NA	NA	NA	NA	NA	NA	NA	6.7 (0.030361)	NA	NA	NA	NA	NA	NA	NA	6.9 (0.014548)	NA	NA	NA	NA	NA	NA	NA	NA	NA	NA	NA	NA	NA	NA	NA	NA	NA	6.1 (0.010925)	NA	NA
meiotic cell cycle phase transition	NA	NA	NA	NA	NA	NA	NA	NA	NA	5.6 (0.04918)	NA	NA	NA	NA	NA	NA	NA	NA	NA	NA	NA	NA	NA	NA	NA	NA	NA	NA	NA	NA	NA	NA	NA	NA	NA	NA	NA	NA	NA	NA	NA
meiotic spindle pole body	NA	NA	NA	NA	NA	NA	NA	NA	NA	16.7 (0.015625)	NA	NA	NA	NA	NA	NA	NA	NA	NA	NA	NA	NA	NA	NA	NA	NA	NA	NA	NA	NA	NA	NA	NA	NA	NA	NA	NA	NA	NA	NA	NA
melatonin binding	NA	NA	NA	NA	NA	NA	NA	NA	NA	NA	NA	NA	2.6 (0.028708)	NA	NA	NA	8 (0.004644)	NA	NA	NA	NA	NA	NA	NA	NA	NA	NA	NA	NA	NA	NA	NA	NA	NA	NA	NA	NA	NA	NA	NA	NA
membrane biogenesis	NA	NA	NA	2.1 (0.004737)	NA	3.9 (0.002033)	5.1 (0.002335)	NA	NA	4.1 (0.000314)	NA	NA	NA	NA	NA	NA	NA	NA	NA	5.4 (0.000361)	NA	2.8 (0.009545)	NA	5.6 (0.02563)	NA	2.9 (1.7e-05)	NA	2.2 (0.002057)	NA	NA	NA	NA	NA	2.5 (0.014846)	NA	8 (0.004173)	3.2 (0.016867)	3.8 (1.2e-05)	NA	NA	NA
membrane disassembly	NA	NA	NA	NA	NA	NA	NA	NA	NA	NA	NA	NA	NA	NA	NA	NA	11.1 (0.038462)	NA	NA	NA	NA	NA	NA	NA	NA	NA	NA	NA	NA	NA	NA	NA	NA	NA	NA	NA	NA	NA	NA	NA	NA
methionine adenosyltransferase activity	NA	NA	NA	NA	NA	NA	NA	NA	NA	NA	NA	NA	NA	25 (0.046512)	NA	NA	NA	NA	NA	NA	NA	NA	NA	NA	NA	NA	NA	NA	NA	NA	NA	NA	NA	NA	NA	NA	NA	NA	NA	NA	NA
methylglyoxal reductase (NADH-dependent) activity	NA	NA	NA	NA	NA	NA	NA	NA	NA	NA	NA	NA	NA	NA	NA	7.1 (0.040541)	NA	NA	NA	NA	NA	NA	NA	NA	NA	NA	NA	NA	NA	NA	NA	NA	NA	NA	NA	NA	NA	NA	NA	NA	NA
methylglyoxal reductase (NADPH-dependent) activity	NA	NA	NA	NA	NA	NA	NA	12.5 (0.040541)	NA	NA	NA	NA	NA	NA	NA	NA	NA	NA	NA	NA	NA	NA	NA	NA	NA	NA	NA	NA	NA	NA	NA	NA	NA	NA	NA	NA	NA	NA	NA	NA	NA
mevalonate kinase activity	NA	NA	NA	NA	NA	NA	NA	NA	NA	NA	NA	NA	NA	NA	NA	NA	NA	NA	NA	NA	NA	NA	NA	NA	NA	NA	8.3 (0.045267)	NA	NA	NA	NA	NA	NA	NA	NA	NA	NA	NA	NA	NA	NA
microbody	NA	NA	NA	NA	NA	NA	NA	NA	NA	NA	NA	NA	NA	NA	NA	NA	NA	NA	NA	NA	NA	NA	2.8 (5e-04)	NA	NA	NA	NA	NA	NA	NA	NA	NA	NA	NA	NA	NA	NA	NA	NA	NA	NA
microtubule anchoring	NA	NA	NA	NA	NA	NA	NA	NA	NA	NA	NA	NA	NA	NA	NA	NA	NA	12.5 (0.039022)	NA	NA	NA	11.1 (0.019608)	20 (0.019608)	NA	NA	NA	4.2 (0.039022)	NA	NA	NA	NA	NA	NA	NA	NA	NA	NA	NA	NA	NA	5 (0.039022)
microtubule organizing center attachment site	NA	NA	NA	NA	NA	NA	NA	NA	NA	NA	NA	NA	NA	NA	3 (0.005894)	2.4 (0.02069)	NA	NA	NA	NA	NA	NA	NA	NA	NA	NA	NA	NA	NA	NA	NA	NA	NA	NA	NA	NA	NA	NA	NA	NA	3.3 (0.041092)
mismatched DNA binding	NA	NA	NA	NA	NA	NA	NA	NA	NA	NA	NA	NA	NA	NA	NA	NA	NA	NA	NA	4.8 (0.025319)	NA	NA	NA	NA	NA	NA	NA	NA	NA	NA	NA	NA	NA	NA	NA	NA	NA	NA	NA	NA	NA
mitochondrial electron transport, NADH to ubiquinone	NA	NA	NA	NA	NA	NA	NA	NA	NA	NA	NA	NA	NA	NA	NA	NA	NA	NA	NA	NA	NA	NA	NA	NA	NA	16.7 (0.038462)	NA	NA	NA	NA	NA	NA	NA	NA	NA	NA	NA	NA	NA	NA	NA
mitochondrial electron transport, ubiquinol to cytochrome c	NA	NA	NA	NA	NA	NA	NA	6.9 (0.034325)	NA	NA	NA	NA	NA	NA	NA	NA	NA	NA	NA	NA	NA	NA	NA	NA	NA	NA	NA	NA	NA	NA	NA	NA	NA	NA	NA	NA	NA	NA	NA	NA	NA
mitochondrial iron-sulfur cluster assembly complex	NA	NA	NA	11.1 (0.036842)	NA	20 (0.026316)	NA	NA	NA	NA	NA	NA	NA	NA	NA	NA	NA	NA	NA	NA	NA	NA	NA	NA	NA	NA	NA	NA	NA	NA	NA	NA	NA	NA	NA	NA	NA	NA	NA	NA	NA
modified amino acid transport	NA	NA	NA	NA	NA	NA	NA	NA	NA	NA	NA	NA	NA	NA	NA	NA	NA	7.4 (0.001901)	NA	NA	NA	NA	NA	NA	NA	2.2 (0.03562)	NA	NA	NA	NA	NA	NA	NA	NA	NA	NA	NA	NA	NA	NA	2.8 (0.041883)
molecular function inhibitor activity	NA	NA	NA	NA	NA	NA	NA	5.5 (0.001271)	NA	NA	NA	NA	NA	NA	NA	NA	NA	NA	NA	4.2 (0.04294)	NA	NA	NA	NA	NA	4.4 (0.005809)	NA	NA	NA	2.2 (0.046285)	50 (0.021672)	NA	NA	NA	NA	NA	NA	NA	NA	NA	NA
molecular sequestering activity	NA	12.5 (0.046918)	NA	NA	NA	NA	NA	12.5 (0.001116)	NA	NA	NA	NA	NA	NA	NA	3.6 (0.02561)	NA	NA	NA	NA	NA	NA	NA	NA	NA	NA	NA	NA	NA	5.3 (0.012337)	NA	NA	NA	NA	NA	NA	NA	NA	NA	NA	NA
monocarboxylic acid metabolic process	NA	NA	NA	NA	NA	NA	2.8 (0.002755)	NA	NA	NA	NA	NA	NA	NA	NA	NA	NA	NA	NA	NA	NA	NA	NA	NA	NA	NA	NA	NA	NA	NA	NA	NA	NA	NA	NA	NA	NA	NA	NA	NA	NA
monocarboxylic acid transport	NA	NA	NA	NA	NA	NA	NA	NA	NA	NA	NA	NA	NA	NA	NA	NA	NA	NA	NA	NA	NA	4.7 (0.035528)	NA	NA	NA	NA	NA	NA	NA	NA	NA	NA	NA	NA	NA	NA	NA	NA	NA	NA	NA
monooxygenase activity	NA	NA	NA	NA	NA	NA	NA	NA	NA	NA	NA	NA	NA	NA	NA	NA	NA	NA	NA	5.3 (0.033559)	NA	NA	NA	NA	NA	NA	NA	NA	NA	NA	NA	NA	NA	NA	NA	NA	NA	NA	NA	NA	NA
multi-organism cellular process	NA	NA	NA	NA	NA	NA	NA	NA	NA	NA	NA	NA	NA	NA	NA	NA	NA	NA	NA	NA	NA	NA	NA	3.4 (0.008358)	NA	NA	NA	NA	NA	NA	NA	NA	NA	NA	NA	NA	NA	NA	NA	NA	NA
multi-organism reproductive process	NA	NA	NA	NA	NA	NA	2.7 (0.000708)	NA	NA	NA	NA	NA	NA	NA	NA	NA	NA	NA	NA	NA	NA	NA	NA	NA	NA	NA	NA	NA	NA	NA	NA	NA	NA	NA	NA	NA	NA	NA	NA	NA	NA
nascent polypeptide-associated complex binding	NA	NA	NA	NA	NA	NA	NA	NA	NA	NA	6.2 (0.009852)	NA	NA	NA	NA	NA	NA	NA	NA	NA	NA	NA	NA	NA	NA	NA	NA	NA	NA	NA	NA	NA	NA	NA	NA	NA	NA	NA	NA	NA	NA
ncRNA transcription associated with protein coding gene TSS/TES	NA	NA	NA	NA	NA	NA	25 (0.016393)	NA	NA	NA	NA	NA	NA	NA	NA	NA	11.1 (0.04918)	NA	NA	NA	NA	NA	NA	NA	NA	NA	NA	NA	NA	NA	NA	NA	NA	NA	NA	NA	NA	NA	NA	NA	NA
negative regulation of catabolic process	NA	2.2 (0.02528)	NA	NA	NA	NA	NA	NA	NA	NA	NA	NA	NA	NA	NA	NA	NA	NA	NA	NA	NA	NA	NA	NA	NA	NA	NA	NA	NA	NA	NA	NA	NA	NA	NA	NA	2.1 (0.027683)	NA	NA	NA	NA
negative regulation of growth	NA	NA	NA	NA	NA	NA	NA	3.8 (0.03663)	NA	NA	NA	NA	NA	NA	NA	NA	NA	NA	NA	NA	NA	NA	NA	NA	NA	NA	NA	NA	NA	NA	NA	NA	NA	NA	NA	NA	NA	NA	NA	NA	NA
negative regulation of transcription by transcription factor localization	NA	NA	NA	NA	NA	NA	NA	NA	NA	NA	NA	NA	NA	NA	NA	NA	NA	25 (0.047619)	NA	NA	NA	NA	NA	NA	NA	NA	NA	NA	NA	NA	NA	NA	NA	NA	NA	NA	NA	NA	NA	NA	NA
nitrogen cycle metabolic process	NA	NA	NA	NA	NA	NA	NA	NA	NA	NA	NA	NA	2.2 (0.022878)	NA	NA	NA	NA	NA	NA	NA	2.3 (0.023582)	NA	NA	NA	NA	NA	NA	NA	NA	NA	50 (0.015939)	NA	NA	NA	NA	11.1 (0.039449)	NA	NA	NA	NA	NA
nitrogen utilization	NA	NA	NA	NA	NA	NA	2.5 (0.024343)	NA	NA	NA	NA	NA	NA	NA	NA	NA	NA	NA	NA	NA	NA	NA	NA	NA	NA	NA	NA	NA	NA	NA	NA	NA	NA	NA	NA	NA	NA	NA	NA	NA	NA
nuclear mRNA surveillance of mRNP export	20 (0.033333)	NA	NA	NA	NA	NA	NA	NA	NA	NA	NA	9.1 (0.033333)	NA	NA	NA	NA	NA	NA	NA	NA	NA	NA	NA	NA	NA	16.7 (0.033333)	NA	NA	NA	NA	NA	NA	NA	NA	NA	NA	NA	NA	NA	NA	NA
nuclear periphery	NA	NA	NA	NA	NA	NA	NA	NA	NA	NA	NA	NA	NA	3.5 (0.000831)	NA	NA	NA	NA	NA	NA	NA	NA	NA	NA	NA	NA	NA	NA	NA	NA	NA	NA	NA	NA	NA	NA	NA	NA	NA	NA	NA
nucleobase binding	NA	NA	NA	5.6 (0.048717)	NA	NA	NA	NA	NA	NA	NA	NA	NA	NA	NA	NA	NA	NA	NA	NA	NA	NA	NA	NA	NA	NA	NA	6.9 (0.00456)	NA	NA	NA	NA	NA	NA	NA	NA	NA	NA	NA	NA	NA
nucleobase transport	NA	NA	NA	NA	NA	NA	NA	NA	NA	NA	NA	NA	NA	NA	NA	NA	NA	NA	NA	6.5 (0.007419)	NA	NA	NA	NA	NA	NA	NA	NA	NA	NA	NA	4.5 (0.00512)	NA	NA	NA	14.3 (0.004121)	NA	NA	NA	NA	NA
nucleobase-containing compound kinase activity	NA	NA	NA	NA	NA	NA	NA	NA	NA	NA	NA	NA	NA	NA	NA	NA	NA	NA	NA	NA	NA	NA	NA	NA	NA	NA	NA	NA	NA	NA	33.3 (0.041522)	NA	NA	NA	NA	NA	NA	NA	NA	NA	NA
nucleoside diphosphate metabolic process	NA	NA	NA	NA	NA	NA	NA	NA	NA	NA	NA	NA	NA	NA	NA	NA	3.7 (2.5e-05)	NA	NA	NA	NA	NA	NA	NA	NA	NA	NA	NA	NA	NA	NA	NA	NA	NA	NA	NA	NA	NA	NA	NA	NA
nucleoside triphosphate metabolic process	NA	NA	NA	NA	NA	NA	NA	2.5 (0.000279)	NA	NA	NA	NA	NA	NA	NA	NA	NA	NA	NA	NA	NA	NA	NA	NA	NA	NA	NA	NA	NA	3.2 (0)	NA	NA	NA	NA	NA	NA	NA	NA	NA	NA	NA
nucleoside-triphosphate diphosphatase activity	NA	NA	NA	NA	NA	NA	NA	NA	NA	NA	NA	NA	NA	NA	NA	NA	NA	4.3 (0.047658)	NA	NA	NA	NA	NA	NA	NA	NA	NA	NA	NA	NA	NA	NA	NA	NA	NA	NA	NA	NA	NA	NA	NA
nucleotide phosphorylation	NA	NA	NA	NA	NA	NA	4.2 (0.00119)	NA	NA	NA	NA	NA	NA	NA	NA	NA	4.4 (0)	NA	NA	NA	NA	NA	NA	NA	NA	NA	NA	NA	NA	NA	NA	NA	NA	NA	NA	NA	NA	NA	NA	NA	NA
odorant binding	10 (0.021588)	NA	NA	NA	NA	10 (0.03829)	14.3 (0.042277)	NA	NA	NA	NA	NA	NA	NA	NA	NA	NA	NA	NA	NA	NA	11.1 (0.016213)	NA	NA	NA	7.7 (0.020246)	NA	6.9 (0.005392)	NA	NA	NA	10 (0.019574)	10 (0.014194)	NA	3.1 (0.016213)	NA	NA	NA	NA	20 (0.009474)	NA
oligosaccharide metabolic process	NA	NA	NA	NA	NA	NA	NA	NA	2.2 (0.044357)	NA	NA	NA	NA	NA	NA	NA	NA	NA	NA	NA	NA	3 (0.021038)	NA	NA	NA	2.1 (0.031548)	NA	NA	NA	2.6 (0.002414)	NA	NA	NA	NA	NA	NA	NA	NA	NA	NA	NA
one-carbon metabolic process	NA	NA	NA	NA	NA	NA	NA	NA	NA	NA	NA	NA	NA	5.7 (0.018192)	NA	NA	NA	NA	NA	NA	NA	NA	NA	NA	NA	3.7 (0.000474)	NA	NA	NA	NA	NA	NA	NA	2.4 (0.031945)	NA	NA	NA	NA	NA	4.7 (0.014355)	NA
organic acid binding	NA	NA	NA	NA	NA	NA	NA	NA	NA	3 (0.032027)	NA	NA	NA	NA	NA	NA	NA	NA	NA	NA	NA	NA	NA	NA	NA	4.2 (0.000514)	NA	NA	NA	NA	NA	NA	NA	NA	NA	NA	NA	NA	NA	NA	NA
organic acid transport	NA	NA	NA	NA	NA	NA	NA	NA	NA	NA	NA	NA	NA	2.9 (0.008334)	NA	NA	NA	NA	NA	NA	NA	NA	NA	NA	NA	NA	NA	NA	NA	NA	NA	NA	NA	NA	NA	NA	NA	NA	NA	NA	NA
organic cation transport	NA	NA	NA	NA	NA	4.6 (0.031102)	NA	NA	NA	NA	NA	NA	NA	NA	NA	NA	NA	NA	NA	NA	NA	NA	NA	NA	NA	NA	NA	NA	NA	NA	NA	NA	NA	NA	NA	NA	NA	NA	NA	NA	NA
organic hydroxy compound transmembrane transporter activity	NA	NA	NA	NA	NA	NA	NA	NA	NA	NA	NA	NA	NA	NA	NA	NA	3.8 (0.04491)	NA	NA	NA	NA	NA	NA	NA	NA	NA	NA	NA	NA	NA	NA	NA	NA	NA	NA	NA	NA	NA	NA	NA	NA
organic hydroxy compound transport	NA	NA	NA	NA	NA	NA	NA	NA	NA	NA	NA	NA	NA	NA	NA	NA	NA	2.5 (0.002264)	NA	NA	NA	NA	NA	NA	NA	NA	NA	NA	NA	NA	NA	NA	NA	NA	NA	NA	NA	NA	NA	NA	NA
ornithine metabolic process	7.1 (0.012177)	NA	NA	NA	NA	NA	NA	NA	NA	NA	NA	NA	NA	NA	NA	NA	NA	NA	NA	NA	NA	NA	NA	NA	NA	NA	NA	2.6 (0.030303)	NA	NA	NA	NA	NA	NA	NA	NA	4.3 (0.021399)	NA	NA	NA	NA
ornithine(lysine) transaminase activity	NA	NA	NA	NA	NA	NA	NA	NA	NA	NA	NA	NA	NA	NA	NA	NA	NA	NA	NA	33.3 (0.045455)	NA	NA	NA	NA	NA	NA	NA	NA	NA	NA	NA	NA	NA	NA	NA	NA	16.7 (0.045455)	NA	NA	NA	NA
ornithine-oxo-acid transaminase activity	NA	NA	NA	NA	NA	NA	NA	NA	NA	NA	NA	NA	NA	NA	NA	NA	NA	NA	NA	33.3 (0.045455)	NA	NA	NA	NA	NA	NA	NA	NA	NA	NA	NA	NA	NA	NA	NA	NA	16.7 (0.045455)	NA	NA	NA	NA
oxazole or thiazole metabolic process	NA	NA	NA	NA	NA	NA	25 (0.021445)	NA	NA	NA	NA	NA	NA	NA	NA	NA	11.1 (0.03781)	NA	NA	33.3 (0.014108)	7.1 (0.038939)	NA	NA	NA	NA	NA	NA	NA	NA	NA	NA	NA	20 (0.009029)	NA	NA	NA	NA	12.5 (0.014673)	5.9 (0.045147)	NA	NA
oxidoreductase activity, acting on NAD(P)H	NA	NA	NA	NA	NA	NA	NA	NA	NA	NA	NA	NA	NA	NA	NA	NA	4.1 (0.003974)	NA	NA	3.4 (0.02551)	NA	NA	NA	NA	NA	NA	NA	NA	NA	NA	NA	NA	NA	NA	NA	NA	NA	NA	NA	NA	NA
oxidoreductase activity, acting on a heme group of donors	NA	NA	NA	NA	NA	NA	NA	NA	NA	NA	NA	NA	NA	NA	NA	NA	NA	NA	NA	NA	NA	NA	NA	NA	NA	NA	NA	NA	NA	4.5 (0.000776)	NA	NA	NA	NA	NA	NA	NA	NA	NA	NA	NA
oxidoreductase activity, acting on diphenols and related substances as donors	NA	NA	NA	NA	NA	NA	NA	9.9 (0)	NA	NA	NA	NA	NA	NA	NA	NA	NA	NA	NA	NA	NA	NA	NA	NA	NA	NA	NA	NA	NA	5.2 (1e-06)	NA	NA	NA	NA	NA	NA	NA	NA	NA	NA	NA
oxidoreductase activity, acting on metal ions	NA	NA	NA	NA	NA	NA	NA	NA	NA	3.8 (0.044833)	NA	NA	NA	NA	NA	NA	NA	NA	NA	4.4 (0.046209)	NA	NA	NA	NA	NA	NA	3.8 (0.002596)	NA	NA	NA	NA	NA	3.2 (0.046209)	NA	NA	NA	2.6 (0.020636)	NA	NA	NA	NA
oxidoreductase activity, acting on other nitrogenous compounds as donors	NA	NA	NA	NA	NA	NA	NA	6.2 (0.024633)	NA	NA	NA	NA	NA	NA	NA	NA	NA	NA	NA	NA	NA	NA	NA	NA	NA	NA	NA	NA	NA	NA	NA	NA	NA	NA	NA	NA	NA	NA	NA	NA	4.9 (0.047677)
oxidoreductase activity, acting on paired donors, with incorporation or reduction of molecular oxygen, NAD(P)H as one donor, and incorporation of two atoms of oxygen into one donor	NA	NA	NA	NA	NA	NA	NA	12.5 (0.027778)	NA	NA	NA	NA	NA	NA	NA	NA	NA	NA	NA	NA	NA	NA	NA	NA	NA	NA	NA	NA	NA	NA	NA	NA	NA	NA	NA	NA	NA	NA	NA	NA	NA
oxidoreductase activity, acting on single donors with incorporation of molecular oxygen	NA	NA	NA	NA	NA	NA	NA	NA	NA	NA	NA	NA	NA	NA	NA	NA	NA	NA	NA	NA	NA	NA	NA	NA	NA	NA	NA	NA	NA	NA	NA	NA	NA	NA	NA	16.7 (0.03692)	NA	NA	NA	NA	NA
oxidoreductase activity, acting on the CH-CH group of donors	NA	NA	NA	NA	2.2 (0.039271)	NA	NA	NA	NA	NA	NA	NA	NA	NA	NA	NA	NA	NA	NA	NA	NA	NA	NA	NA	NA	NA	NA	NA	NA	NA	NA	NA	NA	NA	NA	NA	NA	NA	NA	NA	NA
oxidoreductase activity, acting on the CH-CH group of donors, oxygen as acceptor	NA	NA	NA	NA	NA	NA	NA	NA	NA	NA	NA	NA	NA	NA	NA	NA	7.7 (0.024957)	NA	NA	NA	NA	NA	NA	NA	NA	NA	NA	NA	NA	NA	NA	NA	NA	NA	NA	NA	NA	NA	NA	NA	NA
oxidoreductase activity, acting on the CH-CH group of donors, quinone or related compound as acceptor	NA	NA	NA	NA	NA	NA	NA	5.5 (0.011966)	NA	NA	NA	NA	NA	NA	NA	NA	NA	NA	NA	NA	NA	NA	NA	NA	NA	NA	NA	NA	NA	3 (0.023908)	NA	NA	NA	NA	NA	NA	NA	NA	NA	NA	NA
oxidoreductase activity, acting on the CH-NH group of donors	NA	NA	NA	NA	NA	NA	NA	NA	NA	NA	NA	NA	NA	NA	NA	NA	NA	NA	NA	NA	NA	NA	NA	NA	NA	2.1 (0.048272)	NA	NA	NA	NA	NA	NA	NA	NA	NA	NA	NA	NA	NA	NA	NA
oxidoreductase activity, acting on the CH-OH group of donors, cytochrome as acceptor	NA	NA	NA	NA	NA	NA	NA	NA	NA	NA	NA	NA	NA	NA	NA	NA	5.7 (0.049002)	NA	NA	NA	NA	NA	NA	NA	NA	NA	NA	NA	NA	NA	NA	NA	NA	NA	NA	NA	NA	NA	NA	NA	NA
oxidoreductase activity, acting on the CH-OH group of donors, quinone or similar compound as acceptor	NA	NA	NA	NA	NA	NA	NA	NA	NA	NA	NA	NA	NA	NA	NA	NA	NA	NA	NA	NA	NA	NA	NA	NA	NA	16.7 (0.025316)	NA	NA	NA	NA	NA	NA	NA	NA	NA	NA	NA	NA	NA	NA	NA
oxidoreductase activity, acting on the aldehyde or oxo group of donors	NA	NA	NA	NA	NA	NA	NA	NA	NA	NA	NA	NA	NA	NA	NA	NA	2.9 (0.023571)	NA	NA	NA	NA	NA	NA	NA	NA	NA	NA	NA	NA	NA	NA	NA	NA	NA	NA	NA	NA	NA	NA	NA	NA
oxidoreductase complex	NA	NA	NA	NA	NA	NA	NA	3.2 (0)	NA	NA	NA	NA	NA	NA	NA	NA	NA	NA	NA	NA	NA	NA	NA	NA	NA	NA	NA	NA	NA	2.8 (0)	NA	NA	NA	NA	NA	NA	NA	NA	NA	NA	NA
oxidoreduction-driven active transmembrane transporter activity	NA	NA	NA	NA	NA	NA	NA	5.2 (0.00019)	NA	NA	NA	NA	NA	NA	NA	NA	NA	NA	NA	NA	NA	NA	NA	NA	NA	NA	NA	NA	NA	4.9 (0)	NA	NA	NA	NA	NA	NA	NA	NA	NA	NA	NA
oxygen binding	NA	NA	NA	NA	NA	NA	NA	12.5 (0.000866)	NA	NA	NA	NA	NA	NA	NA	NA	NA	NA	NA	NA	NA	NA	NA	NA	NA	NA	NA	NA	NA	NA	NA	10 (0.029781)	NA	NA	NA	NA	8.3 (0.027506)	NA	NA	NA	NA
palmitoyltransferase complex	NA	NA	NA	NA	NA	NA	NA	NA	NA	NA	NA	NA	NA	NA	NA	NA	NA	NA	NA	NA	NA	NA	NA	NA	NA	NA	NA	NA	NA	NA	NA	NA	NA	NA	NA	8.3 (0.041074)	NA	NA	NA	NA	NA
passive transmembrane transporter activity	NA	NA	NA	NA	NA	NA	NA	NA	NA	NA	NA	NA	NA	NA	NA	NA	NA	NA	NA	NA	NA	NA	NA	NA	NA	NA	NA	NA	NA	2.1 (0.018464)	NA	NA	NA	NA	NA	NA	NA	NA	NA	NA	NA
peptide catabolic process	NA	NA	NA	NA	NA	NA	NA	NA	NA	NA	NA	NA	NA	NA	NA	NA	NA	NA	NA	NA	NA	NA	NA	NA	NA	NA	NA	2.5 (0.012042)	NA	NA	NA	NA	NA	NA	NA	NA	NA	NA	NA	NA	NA
peptidyl-cysteine modification	NA	NA	NA	NA	NA	NA	NA	NA	NA	NA	NA	NA	NA	NA	NA	NA	NA	NA	NA	NA	NA	NA	NA	NA	NA	NA	NA	NA	NA	NA	NA	NA	NA	NA	NA	9.1 (0.028455)	NA	NA	NA	NA	NA
peptidyl-serine acetylation	NA	NA	NA	NA	NA	10 (0.027397)	NA	6.2 (0.027397)	NA	NA	NA	NA	NA	NA	NA	NA	NA	NA	NA	14.3 (0.027397)	NA	NA	NA	50 (0.027397)	NA	NA	NA	NA	4.3 (0.027397)	NA	NA	10 (0.027397)	NA	NA	NA	NA	NA	6.2 (0.027397)	NA	NA	NA
peptidyl-threonine dephosphorylation	NA	NA	NA	NA	NA	NA	NA	NA	NA	NA	NA	NA	NA	NA	NA	NA	7.7 (0.010432)	NA	NA	NA	NA	NA	NA	NA	NA	NA	NA	NA	NA	NA	NA	NA	NA	NA	NA	NA	NA	NA	NA	NA	6.7 (0.010432)
periplasmic space	NA	NA	NA	NA	NA	NA	NA	NA	NA	NA	NA	NA	NA	NA	NA	NA	4.9 (0.005399)	NA	NA	NA	NA	NA	NA	NA	NA	NA	NA	NA	NA	2.2 (0.041706)	NA	NA	NA	NA	NA	NA	NA	NA	NA	NA	NA
peroxisome targeting sequence binding	NA	NA	NA	NA	NA	NA	NA	NA	NA	NA	NA	NA	NA	NA	NA	NA	NA	NA	NA	NA	NA	NA	NA	NA	NA	NA	NA	NA	NA	3.5 (0.02162)	NA	NA	NA	NA	NA	NA	NA	NA	NA	NA	NA
phenylalanine transport	NA	NA	NA	NA	NA	NA	NA	NA	11.1 (0.009805)	NA	NA	NA	NA	NA	NA	NA	NA	NA	NA	NA	NA	NA	NA	NA	NA	NA	NA	NA	NA	NA	NA	NA	NA	NA	NA	NA	NA	NA	NA	NA	NA
phenylpyruvate decarboxylase activity	NA	NA	NA	5.4 (0.023715)	NA	NA	NA	NA	NA	NA	6.5 (0.023715)	NA	NA	NA	NA	NA	NA	NA	NA	NA	NA	11.1 (0.023715)	NA	NA	NA	NA	NA	NA	NA	NA	NA	NA	NA	NA	NA	NA	NA	NA	NA	NA	NA
pheromone activity	NA	NA	NA	NA	NA	NA	NA	NA	NA	NA	NA	NA	4.9 (0.047619)	NA	NA	NA	NA	NA	NA	NA	5.3 (0.047619)	NA	NA	NA	NA	NA	NA	5.3 (0.047619)	NA	NA	NA	NA	NA	NA	NA	NA	NA	NA	NA	NA	NA
phosphatase complex	NA	NA	NA	NA	NA	NA	2.5 (0.019085)	NA	NA	NA	NA	NA	NA	NA	NA	NA	NA	2.3 (0.019085)	NA	NA	NA	NA	NA	NA	NA	NA	NA	NA	NA	NA	NA	NA	NA	NA	NA	NA	NA	NA	NA	NA	NA
phosphatidic acid metabolic process	NA	NA	NA	NA	NA	NA	NA	NA	NA	NA	NA	NA	NA	NA	NA	NA	NA	NA	NA	NA	NA	NA	NA	NA	NA	NA	NA	2.6 (0.009037)	NA	NA	NA	NA	NA	NA	NA	NA	NA	NA	NA	NA	NA
phosphatidyl phospholipase B activity	NA	NA	NA	NA	NA	NA	NA	NA	NA	NA	NA	NA	NA	NA	NA	NA	NA	NA	NA	NA	NA	NA	NA	NA	NA	NA	NA	3.5 (0.047778)	NA	NA	NA	NA	NA	NA	NA	NA	NA	NA	NA	NA	NA
phosphatidyl-N-dimethylethanolamine N-methyltransferase activity	NA	NA	NA	NA	NA	NA	NA	NA	NA	NA	NA	NA	NA	NA	NA	NA	11.1 (0.02381)	NA	NA	NA	NA	NA	NA	NA	NA	NA	NA	NA	9.1 (0.02381)	NA	NA	NA	NA	NA	NA	NA	NA	NA	NA	NA	NA
phosphatidyl-N-methylethanolamine N-methyltransferase activity	NA	NA	NA	NA	NA	NA	NA	NA	NA	NA	NA	NA	NA	NA	NA	NA	11.1 (0.02381)	NA	NA	NA	NA	NA	NA	NA	NA	NA	NA	NA	9.1 (0.02381)	NA	NA	NA	NA	NA	NA	NA	NA	NA	NA	NA	NA
phosphatidylethanolamine N-methyltransferase activity	NA	NA	NA	NA	NA	NA	NA	NA	NA	NA	NA	NA	NA	NA	NA	NA	5.9 (0.047619)	NA	NA	NA	NA	NA	NA	NA	NA	NA	NA	NA	4.3 (0.047619)	NA	NA	NA	NA	NA	NA	NA	NA	NA	NA	NA	NA
phosphatidylglycerophosphatase activity	NA	NA	NA	NA	NA	NA	NA	NA	NA	NA	NA	NA	NA	NA	NA	NA	NA	NA	NA	NA	NA	NA	NA	NA	NA	NA	NA	NA	NA	NA	NA	NA	NA	NA	NA	NA	NA	12.5 (0.014085)	NA	NA	NA
phosphatidylinositol acyl-chain remodeling	NA	NA	NA	NA	NA	NA	NA	NA	NA	NA	6.2 (0.026667)	NA	NA	NA	NA	NA	NA	NA	NA	NA	NA	NA	NA	NA	NA	NA	NA	NA	NA	NA	NA	NA	NA	NA	NA	NA	NA	NA	NA	NA	NA
phosphoacetylglucosamine mutase activity	NA	NA	NA	NA	NA	NA	NA	NA	NA	NA	NA	NA	NA	NA	NA	NA	NA	NA	NA	33.3 (0.025641)	NA	NA	NA	NA	NA	NA	NA	NA	NA	NA	NA	NA	NA	NA	NA	NA	NA	NA	NA	NA	NA
phosphoenolpyruvate carboxykinase activity	NA	NA	NA	NA	NA	NA	NA	NA	NA	NA	NA	NA	NA	NA	NA	NA	NA	25 (0.043478)	NA	NA	NA	NA	NA	NA	NA	NA	NA	NA	NA	NA	NA	20 (0.043478)	NA	NA	6.2 (0.043478)	NA	NA	NA	NA	NA	NA
phosphoglycerate mutase activity	NA	NA	NA	NA	NA	NA	NA	NA	NA	NA	NA	NA	NA	NA	NA	NA	4.8 (0.019042)	NA	NA	NA	NA	NA	NA	NA	NA	NA	NA	NA	NA	NA	NA	NA	NA	NA	NA	NA	NA	NA	NA	NA	NA
phosphopantetheine-dependent carrier activity	NA	NA	NA	11.1 (0.043478)	NA	20 (0.043478)	NA	NA	NA	NA	NA	NA	NA	NA	NA	NA	NA	NA	NA	NA	NA	NA	NA	NA	NA	NA	NA	NA	NA	NA	NA	NA	NA	NA	NA	NA	NA	NA	NA	NA	NA
phosphoprotein binding	NA	NA	NA	NA	NA	NA	NA	NA	4.9 (0.008121)	NA	NA	NA	NA	NA	NA	NA	NA	NA	NA	NA	NA	NA	NA	NA	NA	NA	NA	NA	NA	NA	NA	NA	2.1 (0.044957)	NA	NA	NA	NA	NA	NA	NA	NA
phosphopyruvate hydratase activity	NA	NA	NA	NA	NA	NA	NA	NA	NA	NA	NA	NA	NA	NA	NA	NA	4.8 (0.003266)	NA	NA	NA	NA	NA	NA	NA	NA	NA	NA	NA	NA	NA	NA	NA	NA	NA	NA	NA	NA	NA	NA	NA	NA
phosphopyruvate hydratase complex	NA	NA	NA	5.6 (0.039022)	5.9 (0.019608)	10 (0.039022)	14.3 (0.039022)	NA	NA	NA	NA	NA	NA	NA	NA	NA	11.8 (0.002912)	NA	NA	NA	NA	NA	NA	NA	NA	NA	NA	NA	NA	NA	NA	NA	NA	NA	NA	NA	NA	NA	NA	NA	NA
phosphoribosyl-ATP diphosphatase activity	NA	NA	NA	NA	NA	20 (0.014113)	NA	NA	NA	NA	NA	NA	NA	NA	NA	NA	NA	NA	NA	NA	7.1 (0.044355)	NA	NA	NA	NA	NA	NA	NA	NA	NA	NA	NA	NA	NA	NA	NA	NA	NA	NA	NA	NA
phosphorylation of RNA polymerase II C-terminal domain serine 2 residues	NA	NA	NA	NA	NA	NA	NA	NA	9.7 (0.006494)	NA	NA	NA	NA	NA	NA	NA	NA	NA	NA	NA	NA	NA	NA	NA	NA	NA	NA	NA	NA	NA	NA	NA	NA	NA	NA	NA	NA	NA	NA	NA	NA
phosphotransferase activity, carboxyl group as acceptor	NA	NA	NA	NA	NA	NA	3.8 (0.001008)	NA	NA	NA	NA	NA	NA	NA	NA	NA	4.1 (0)	NA	NA	NA	NA	NA	2.9 (0.004486)	NA	NA	NA	NA	NA	NA	NA	NA	NA	NA	NA	NA	NA	NA	NA	NA	NA	NA
phosphotransferase activity, phosphate group as acceptor	NA	NA	NA	NA	NA	NA	NA	NA	NA	NA	NA	NA	NA	NA	NA	NA	NA	NA	NA	NA	NA	NA	NA	NA	NA	NA	NA	NA	NA	NA	25 (0.03163)	NA	NA	NA	NA	NA	NA	NA	NA	NA	NA
plasma membrane selenite transport	NA	NA	NA	NA	NA	NA	NA	NA	NA	NA	NA	NA	NA	NA	NA	NA	NA	NA	33.3 (0.031579)	NA	NA	NA	NA	NA	NA	NA	NA	NA	NA	NA	NA	NA	NA	NA	NA	NA	NA	NA	NA	NA	NA
polyamine transport	2.9 (0.015529)	NA	NA	NA	NA	3.2 (0.021009)	4.2 (0.024012)	NA	NA	3.8 (0.007625)	NA	NA	NA	NA	NA	NA	NA	NA	NA	4.4 (0.015529)	NA	NA	6.2 (0.008715)	NA	NA	NA	2.5 (0.002539)	NA	NA	NA	NA	NA	NA	NA	NA	NA	NA	NA	NA	NA	NA
polyphosphate metabolic process	NA	NA	NA	NA	NA	NA	NA	NA	4.7 (0.005268)	NA	NA	NA	NA	NA	NA	NA	NA	NA	NA	NA	NA	NA	NA	NA	NA	3.3 (0.003317)	NA	NA	NA	NA	NA	NA	NA	NA	NA	NA	NA	NA	NA	NA	NA
polysaccharide binding	NA	NA	NA	NA	NA	NA	NA	NA	NA	NA	NA	NA	NA	NA	3.4 (0.022222)	NA	NA	NA	NA	NA	NA	NA	NA	NA	NA	NA	4.1 (0.045177)	5.3 (0.022222)	NA	3.9 (0.037607)	NA	NA	NA	NA	NA	NA	NA	NA	NA	NA	NA
polysaccharide localization	NA	NA	NA	NA	NA	NA	NA	NA	NA	NA	NA	NA	NA	NA	NA	NA	NA	NA	50 (0.008786)	NA	NA	NA	NA	NA	NA	NA	NA	NA	NA	NA	NA	NA	NA	NA	NA	NA	NA	NA	NA	NA	10 (0.001796)
positive regulation of transcription from RNA polymerase II promoter involved in cellular response to chemical stimulus	NA	NA	NA	NA	NA	NA	NA	NA	NA	NA	NA	NA	NA	NA	NA	NA	NA	NA	NA	NA	NA	NA	NA	NA	NA	NA	NA	NA	NA	NA	NA	NA	2.6 (0.043243)	NA	NA	NA	NA	NA	NA	NA	NA
pre-snoRNP complex	NA	NA	NA	NA	NA	NA	NA	NA	NA	NA	NA	NA	NA	NA	NA	NA	NA	NA	NA	NA	3.4 (0.041583)	NA	NA	NA	NA	NA	NA	NA	NA	NA	NA	NA	NA	NA	NA	NA	NA	NA	NA	NA	NA
preribosome, large subunit precursor	NA	NA	2.5 (0.017205)	NA	NA	NA	NA	NA	NA	NA	NA	NA	NA	NA	NA	NA	NA	NA	NA	NA	NA	NA	NA	NA	NA	NA	NA	NA	NA	NA	NA	NA	NA	NA	NA	NA	NA	NA	NA	NA	NA
prespliceosome	NA	4.4 (0.036809)	NA	NA	NA	NA	NA	NA	NA	NA	NA	NA	NA	NA	NA	NA	NA	NA	NA	NA	NA	NA	NA	NA	NA	NA	NA	NA	NA	NA	NA	NA	NA	NA	NA	NA	NA	NA	NA	NA	NA
primary alcohol metabolic process	NA	NA	NA	NA	NA	NA	NA	NA	NA	NA	NA	NA	NA	NA	NA	NA	NA	NA	NA	NA	NA	NA	NA	NA	NA	NA	2.1 (0.029995)	NA	NA	NA	NA	NA	NA	NA	NA	NA	NA	NA	NA	NA	NA
proline metabolic process	NA	NA	NA	NA	NA	NA	NA	NA	NA	NA	NA	NA	NA	NA	NA	NA	NA	NA	NA	NA	NA	NA	13.6 (0.015502)	NA	NA	NA	NA	NA	NA	NA	NA	NA	NA	NA	NA	NA	NA	NA	NA	NA	NA
proline transmembrane transport	NA	NA	NA	NA	NA	NA	NA	NA	8.3 (0.018423)	NA	NA	NA	3.3 (0.018423)	NA	NA	NA	NA	NA	NA	NA	NA	NA	NA	NA	NA	NA	NA	NA	4.4 (0.035661)	NA	NA	NA	NA	NA	NA	NA	NA	NA	NA	NA	NA
prospore membrane leading edge	NA	NA	NA	NA	NA	NA	NA	NA	NA	NA	NA	NA	NA	NA	NA	NA	NA	NA	NA	14.3 (0.034898)	NA	NA	NA	NA	NA	NA	NA	NA	4.4 (0.02147)	NA	NA	NA	NA	NA	3.1 (0.011005)	NA	8.7 (0.034898)	NA	NA	NA	NA
prosthetic group binding	NA	NA	NA	11.1 (0.029502)	NA	20 (0.019329)	NA	NA	NA	NA	NA	NA	NA	NA	NA	NA	NA	NA	NA	NA	NA	NA	NA	NA	NA	NA	NA	NA	NA	NA	NA	NA	NA	NA	NA	NA	NA	NA	NA	NA	NA
protease binding	NA	NA	NA	NA	NA	NA	3.8 (0.039056)	NA	NA	NA	NA	NA	NA	NA	NA	NA	NA	NA	NA	NA	NA	NA	NA	NA	NA	NA	NA	NA	NA	NA	NA	NA	NA	NA	NA	NA	NA	NA	NA	NA	2.8 (0.001698)
protein catabolic process in the vacuole	NA	NA	NA	NA	NA	NA	NA	NA	NA	2.1 (0.025389)	NA	NA	NA	NA	NA	NA	NA	NA	NA	NA	NA	NA	NA	NA	NA	NA	NA	NA	NA	NA	NA	NA	NA	NA	NA	NA	NA	NA	NA	NA	NA
protein complex oligomerization	NA	NA	10 (0.04359)	NA	NA	NA	NA	NA	NA	NA	NA	NA	NA	NA	NA	NA	NA	NA	NA	NA	NA	NA	NA	NA	NA	NA	NA	NA	NA	NA	NA	NA	NA	NA	NA	NA	NA	NA	NA	NA	NA
protein de-ADP-ribosylation	NA	NA	NA	NA	NA	NA	NA	NA	NA	16.7 (0.023227)	NA	9.1 (0.028117)	NA	NA	NA	NA	NA	NA	NA	NA	NA	NA	NA	NA	NA	NA	NA	NA	NA	NA	NA	NA	NA	NA	NA	NA	NA	NA	NA	NA	NA
protein dealkylation	NA	NA	NA	NA	NA	NA	NA	NA	NA	NA	NA	NA	NA	NA	NA	NA	NA	NA	NA	NA	NA	NA	NA	NA	NA	NA	NA	NA	NA	NA	50 (0.02187)	NA	NA	NA	NA	NA	NA	NA	NA	NA	NA
protein deglutathionylation	NA	NA	20 (0.012195)	NA	NA	NA	NA	NA	NA	NA	NA	NA	NA	NA	NA	NA	NA	NA	NA	NA	NA	NA	NA	NA	NA	NA	NA	NA	NA	NA	NA	NA	NA	NA	NA	NA	NA	NA	NA	NA	NA
protein dimerization activity	NA	NA	NA	NA	NA	NA	NA	NA	NA	NA	NA	NA	NA	3.8 (0.001172)	NA	NA	NA	NA	NA	NA	NA	NA	NA	NA	NA	NA	NA	NA	NA	NA	NA	NA	NA	NA	NA	NA	NA	NA	NA	NA	NA
protein glutathionylation	NA	NA	NA	NA	NA	NA	NA	NA	NA	NA	NA	NA	NA	NA	NA	NA	NA	NA	NA	NA	NA	NA	NA	NA	NA	NA	NA	NA	NA	NA	100 (0.010976)	NA	NA	NA	NA	NA	NA	NA	NA	NA	NA
protein initiator methionine removal	NA	NA	NA	NA	NA	NA	NA	NA	NA	NA	NA	NA	NA	NA	NA	NA	NA	NA	NA	NA	NA	NA	NA	NA	NA	NA	NA	NA	NA	NA	NA	NA	NA	NA	NA	33.3 (0.017052)	NA	NA	NA	NA	NA
protein localization to cell division site	NA	NA	NA	NA	NA	NA	NA	NA	NA	NA	NA	NA	NA	NA	NA	NA	NA	NA	NA	NA	NA	NA	NA	NA	100 (0.020478)	NA	NA	NA	NA	NA	NA	NA	NA	NA	NA	NA	NA	NA	NA	NA	NA
protein localization to endoplasmic reticulum exit site	NA	NA	NA	NA	NA	NA	NA	NA	NA	NA	NA	NA	NA	NA	NA	NA	NA	NA	NA	NA	NA	NA	NA	NA	NA	NA	NA	NA	NA	2.6 (0.036116)	NA	NA	NA	NA	NA	NA	NA	NA	NA	NA	4.9 (0.02223)
protein localization to nucleolus	NA	NA	NA	NA	NA	NA	NA	3.6 (0.015134)	NA	NA	NA	NA	NA	NA	NA	NA	NA	NA	NA	NA	3 (0.002777)	NA	NA	NA	NA	NA	NA	NA	NA	NA	NA	NA	NA	NA	NA	NA	NA	NA	NA	NA	NA
protein maturation by copper ion transfer	NA	NA	NA	NA	NA	NA	NA	NA	NA	NA	NA	NA	NA	NA	NA	NA	NA	NA	NA	NA	NA	NA	NA	NA	NA	NA	NA	NA	NA	3.5 (0.039435)	NA	NA	NA	NA	NA	NA	NA	NA	NA	NA	NA
protein phosphatase 1 binding	NA	NA	NA	NA	NA	NA	NA	NA	NA	NA	NA	NA	NA	NA	NA	NA	NA	NA	NA	NA	NA	NA	NA	NA	NA	NA	NA	3.1 (0.007531)	NA	NA	NA	NA	NA	NA	NA	NA	NA	NA	NA	NA	NA
protein phosphatase type 1 complex	NA	NA	NA	NA	NA	NA	NA	NA	NA	NA	NA	NA	2.6 (0.043344)	NA	2.3 (0.016254)	NA	NA	NA	NA	NA	NA	NA	NA	NA	NA	NA	NA	3.5 (0.016254)	NA	2.1 (0.043344)	NA	NA	NA	NA	NA	NA	NA	NA	2.4 (0.043344)	NA	NA
protein refolding	NA	NA	NA	NA	NA	NA	NA	NA	3.1 (0.006362)	NA	NA	NA	NA	NA	NA	NA	NA	NA	NA	NA	NA	NA	NA	NA	NA	NA	NA	NA	NA	NA	NA	NA	NA	NA	NA	NA	NA	NA	NA	NA	NA
protein repair	NA	NA	NA	NA	NA	NA	NA	NA	NA	NA	NA	NA	NA	NA	NA	NA	NA	NA	NA	NA	NA	NA	NA	NA	NA	NA	NA	NA	NA	NA	NA	NA	NA	NA	NA	NA	NA	12.5 (0.015928)	NA	NA	NA
protein self-association	NA	NA	NA	NA	NA	NA	NA	NA	NA	NA	NA	NA	NA	NA	NA	3.6 (0.03804)	NA	NA	NA	NA	NA	NA	NA	NA	NA	NA	NA	NA	NA	NA	NA	NA	NA	NA	NA	NA	NA	NA	NA	NA	NA
protein targeting to vacuole involved in autophagy	NA	NA	NA	NA	NA	NA	NA	NA	NA	NA	NA	NA	NA	NA	NA	NA	NA	NA	NA	NA	NA	NA	NA	NA	NA	NA	NA	4.7 (0.04273)	NA	NA	NA	NA	NA	NA	NA	NA	NA	NA	NA	NA	NA
protein unfolding	NA	NA	NA	NA	NA	NA	NA	4.3 (0.018216)	5.4 (0.01927)	NA	NA	NA	2.2 (0.038065)	NA	NA	NA	NA	NA	NA	NA	NA	NA	NA	NA	NA	NA	NA	NA	NA	NA	NA	NA	NA	NA	NA	NA	NA	NA	NA	6.7 (0.026094)	3.3 (0.033876)
proton transmembrane transport	NA	NA	NA	NA	NA	NA	NA	NA	NA	NA	NA	NA	NA	NA	NA	NA	NA	NA	NA	NA	NA	NA	NA	NA	NA	NA	NA	NA	NA	2.3 (0.000393)	NA	NA	NA	NA	NA	NA	NA	NA	NA	NA	NA
proton-transporting ATP synthase complex	NA	NA	NA	NA	NA	NA	NA	NA	NA	NA	NA	NA	NA	NA	NA	NA	NA	NA	NA	NA	NA	NA	NA	NA	NA	NA	NA	NA	NA	4.4 (6e-06)	NA	NA	NA	NA	NA	NA	NA	NA	NA	NA	NA
proton-transporting two-sector ATPase complex	NA	NA	NA	NA	NA	NA	NA	NA	NA	NA	NA	NA	NA	NA	NA	NA	NA	NA	NA	NA	NA	NA	NA	NA	NA	NA	NA	NA	NA	2.1 (0.001652)	NA	NA	NA	NA	NA	NA	NA	NA	NA	NA	NA
pteridine-containing compound metabolic process	NA	NA	NA	NA	NA	NA	NA	NA	NA	NA	NA	NA	NA	NA	NA	NA	NA	NA	NA	NA	NA	NA	NA	NA	NA	NA	NA	NA	NA	NA	NA	NA	NA	2.4 (0.008769)	NA	NA	NA	NA	NA	4.7 (0.006345)	NA
purine nucleoside triphosphate metabolic process	NA	NA	NA	NA	NA	NA	NA	NA	NA	NA	NA	NA	NA	NA	NA	NA	NA	NA	NA	NA	NA	NA	NA	NA	NA	NA	NA	NA	NA	3.5 (0.033774)	NA	NA	NA	NA	NA	NA	NA	NA	NA	NA	NA
purine-containing compound transmembrane transport	NA	NA	NA	NA	NA	NA	NA	NA	NA	NA	NA	NA	NA	NA	NA	NA	NA	NA	NA	NA	NA	NA	NA	NA	NA	NA	NA	NA	NA	2.6 (0.008043)	NA	NA	NA	NA	NA	NA	NA	NA	NA	NA	NA
pyridine-containing compound metabolic process	NA	NA	NA	NA	NA	NA	NA	NA	NA	3 (0.000841)	NA	NA	NA	NA	NA	NA	NA	NA	NA	2.1 (0.029807)	NA	NA	NA	NA	NA	NA	NA	NA	NA	NA	NA	NA	NA	NA	NA	NA	NA	NA	NA	NA	NA
pyrimidine-containing compound metabolic process	NA	NA	NA	NA	NA	NA	5.4 (6.6e-05)	NA	NA	NA	NA	NA	NA	NA	NA	NA	NA	NA	NA	NA	NA	NA	NA	NA	NA	NA	NA	NA	NA	NA	NA	NA	NA	NA	NA	NA	NA	NA	NA	NA	NA
pyruvate decarboxylase activity	NA	NA	NA	NA	NA	NA	18.2 (0.034444)	NA	NA	NA	NA	NA	NA	NA	3 (0.034444)	NA	NA	NA	NA	NA	NA	NA	NA	NA	NA	NA	NA	NA	NA	NA	NA	NA	NA	NA	NA	NA	NA	NA	NA	NA	NA
pyruvate metabolic process	NA	NA	NA	NA	NA	NA	NA	NA	NA	NA	NA	NA	NA	NA	NA	NA	4.2 (0.000211)	NA	NA	NA	NA	NA	NA	NA	NA	NA	NA	NA	NA	NA	NA	NA	NA	NA	NA	NA	NA	NA	NA	NA	NA
quaternary ammonium group binding	NA	NA	NA	2.2 (0.033197)	NA	NA	5.4 (0.018102)	NA	NA	NA	2.6 (0.00137)	NA	NA	NA	NA	NA	NA	NA	NA	NA	NA	4.4 (0.002746)	NA	NA	100 (0.013502)	NA	NA	NA	NA	NA	33.3 (0.02684)	NA	NA	NA	NA	NA	NA	NA	NA	4 (0.046542)	NA
quinone binding	NA	NA	NA	NA	NA	NA	NA	NA	NA	NA	NA	NA	NA	NA	NA	NA	NA	NA	NA	NA	NA	NA	NA	NA	NA	NA	NA	NA	NA	NA	NA	NA	NA	NA	NA	NA	NA	NA	2.4 (0.020083)	NA	NA
racemase and epimerase activity	NA	NA	NA	NA	NA	NA	NA	NA	NA	NA	NA	NA	NA	NA	NA	NA	NA	NA	NA	5.7 (0.029095)	NA	4.4 (0.010295)	NA	NA	NA	NA	NA	NA	NA	NA	NA	NA	NA	NA	NA	NA	NA	NA	NA	NA	NA
racemase and epimerase activity, acting on amino acids and derivatives	NA	NA	NA	NA	NA	NA	NA	NA	NA	NA	NA	NA	NA	NA	NA	NA	NA	NA	NA	28.6 (0.022222)	NA	NA	NA	NA	NA	NA	NA	NA	NA	NA	NA	NA	NA	NA	NA	NA	NA	NA	NA	NA	NA
reactive nitrogen species metabolic process	NA	NA	NA	NA	NA	NA	NA	3.6 (0.01665)	NA	NA	NA	NA	NA	NA	NA	NA	NA	NA	NA	NA	NA	NA	NA	NA	NA	NA	NA	NA	NA	NA	NA	NA	NA	NA	NA	NA	NA	NA	NA	NA	NA
reactive oxygen species metabolic process	NA	NA	NA	NA	NA	NA	3.6 (0.047081)	NA	NA	NA	NA	NA	NA	NA	NA	NA	NA	NA	NA	NA	NA	NA	NA	NA	NA	NA	NA	NA	NA	NA	NA	NA	NA	NA	NA	NA	NA	NA	NA	NA	NA
receptor complex	NA	NA	NA	NA	NA	NA	NA	NA	NA	NA	NA	9.1 (0.026799)	6.7 (0.028288)	NA	NA	NA	NA	NA	NA	NA	NA	NA	NA	NA	NA	NA	8.3 (0.039206)	NA	NA	NA	NA	NA	NA	NA	NA	NA	NA	NA	NA	NA	NA
regulation of DNA-templated transcription, initiation	NA	NA	NA	NA	NA	NA	NA	NA	3 (0.037594)	NA	NA	NA	NA	NA	NA	NA	NA	NA	NA	NA	NA	NA	NA	NA	NA	NA	NA	NA	NA	NA	NA	NA	NA	NA	NA	NA	NA	NA	NA	NA	NA
regulation of membrane lipid distribution	NA	NA	NA	NA	NA	3 (0.027763)	NA	NA	NA	NA	NA	NA	NA	NA	NA	NA	NA	NA	NA	NA	NA	NA	NA	NA	NA	NA	NA	NA	NA	NA	NA	NA	NA	NA	NA	NA	NA	NA	NA	NA	NA
regulation of membrane potential	NA	NA	NA	NA	NA	NA	NA	NA	NA	NA	NA	NA	NA	NA	NA	NA	NA	NA	NA	NA	NA	NA	NA	NA	Inf (0.027209)	NA	NA	3.5 (0.031821)	NA	NA	NA	NA	NA	NA	NA	NA	NA	NA	NA	NA	NA
regulation of protein stability	NA	NA	NA	NA	NA	NA	NA	NA	3.3 (0.011497)	NA	NA	NA	NA	NA	NA	NA	NA	NA	NA	NA	NA	NA	NA	NA	NA	NA	NA	NA	NA	NA	NA	NA	NA	NA	NA	NA	3.4 (0.009592)	NA	NA	NA	NA
regulation of transcription from RNA polymerase II promoter by a nonfermentable carbon source	NA	NA	NA	5.4 (0.012097)	NA	NA	13.3 (0.012097)	NA	NA	NA	NA	NA	3.3 (0.034677)	NA	NA	NA	NA	NA	NA	NA	NA	NA	NA	NA	NA	NA	NA	NA	NA	NA	NA	NA	NA	NA	NA	NA	NA	NA	3 (0.034677)	NA	NA
replication fork protection complex	NA	NA	NA	NA	NA	NA	NA	NA	NA	NA	NA	NA	NA	NA	NA	NA	NA	NA	NA	NA	NA	NA	NA	NA	NA	NA	2.2 (0.01229)	NA	NA	NA	NA	NA	NA	NA	NA	NA	NA	NA	NA	NA	NA
replication-born double-strand break repair via sister chromatid exchange	NA	NA	NA	NA	NA	NA	NA	NA	NA	NA	NA	NA	NA	NA	NA	NA	NA	NA	NA	NA	NA	NA	NA	NA	NA	NA	NA	NA	NA	NA	NA	NA	NA	NA	NA	NA	2.9 (0.023158)	NA	NA	NA	NA
reproduction of a single-celled organism	NA	NA	NA	NA	NA	NA	2.9 (0.000669)	NA	NA	NA	NA	NA	NA	NA	NA	NA	NA	NA	NA	NA	NA	NA	NA	NA	NA	NA	NA	NA	NA	NA	NA	NA	NA	NA	NA	NA	NA	NA	NA	NA	NA
reproductive process in single-celled organism	NA	NA	NA	NA	NA	2.3 (0.036013)	4.2 (0.008108)	NA	NA	NA	NA	NA	NA	NA	NA	NA	NA	NA	NA	NA	NA	NA	NA	NA	NA	NA	NA	NA	NA	NA	NA	NA	NA	NA	NA	NA	NA	NA	NA	NA	NA
respirasome	NA	NA	NA	NA	NA	3.2 (0.000569)	NA	4.3 (0)	NA	NA	NA	NA	NA	NA	NA	NA	NA	NA	NA	NA	NA	NA	NA	NA	NA	NA	NA	NA	NA	3.4 (0)	NA	NA	NA	NA	NA	NA	NA	NA	NA	NA	NA
respiratory chain complex II	NA	NA	NA	NA	NA	NA	NA	NA	NA	NA	NA	NA	NA	NA	NA	NA	NA	NA	NA	NA	NA	NA	NA	NA	NA	NA	NA	NA	NA	NA	NA	NA	NA	NA	NA	NA	NA	NA	2.6 (0.046823)	NA	NA
respiratory chain complex II assembly	NA	NA	NA	NA	NA	NA	NA	NA	NA	NA	NA	NA	NA	NA	NA	NA	NA	NA	NA	NA	NA	NA	NA	NA	NA	NA	NA	NA	NA	NA	100 (0.00969)	NA	4.2 (0.019305)	NA	NA	NA	NA	NA	NA	NA	NA
response to acid chemical	NA	3 (0.047746)	NA	NA	NA	NA	NA	NA	NA	NA	NA	NA	NA	NA	NA	NA	NA	NA	NA	NA	NA	NA	NA	NA	NA	NA	NA	NA	NA	NA	NA	NA	NA	NA	NA	NA	NA	NA	NA	NA	NA
response to alcohol	NA	NA	NA	NA	2.2 (0.046769)	3.8 (0.046769)	NA	NA	3 (0.046769)	NA	NA	3.2 (0.017878)	NA	NA	NA	NA	NA	NA	NA	NA	NA	NA	NA	NA	NA	NA	2.2 (0.03115)	NA	NA	2.9 (0.015756)	NA	NA	NA	NA	NA	NA	NA	NA	NA	NA	NA
response to arsenic-containing substance	3.2 (0.027614)	NA	NA	NA	NA	NA	NA	NA	NA	4.1 (0.017784)	NA	2.2 (0.024615)	NA	NA	NA	NA	NA	NA	NA	NA	NA	NA	NA	14.3 (0.018586)	NA	NA	NA	NA	NA	NA	NA	NA	3.5 (0.018586)	NA	NA	NA	NA	NA	NA	NA	NA
response to carbon starvation	NA	NA	NA	NA	NA	NA	25 (0.041096)	NA	NA	NA	NA	NA	NA	NA	NA	NA	NA	25 (0.041096)	NA	NA	NA	NA	NA	NA	NA	NA	NA	NA	NA	NA	NA	NA	NA	NA	NA	NA	16.7 (0.027397)	NA	NA	NA	NA
response to cold	NA	NA	NA	NA	NA	NA	NA	NA	NA	NA	NA	NA	NA	NA	NA	NA	NA	NA	NA	NA	NA	NA	14.3 (0.043478)	NA	NA	NA	NA	NA	NA	NA	NA	NA	NA	NA	NA	NA	NA	NA	NA	NA	NA
response to copper ion	NA	NA	NA	NA	NA	NA	NA	NA	NA	NA	NA	NA	NA	NA	NA	NA	NA	NA	NA	NA	NA	NA	NA	NA	NA	NA	NA	NA	NA	NA	NA	NA	NA	NA	NA	NA	NA	NA	NA	NA	10 (0.01087)
response to nitrosative stress	NA	NA	NA	NA	NA	NA	NA	8.3 (0.001496)	NA	NA	NA	NA	NA	NA	NA	NA	NA	NA	NA	NA	NA	NA	NA	NA	NA	NA	NA	NA	NA	NA	NA	6.7 (0.024356)	NA	NA	NA	NA	NA	NA	NA	NA	NA
response to organic cyclic compound	NA	NA	4.8 (0.032787)	NA	NA	NA	NA	NA	NA	NA	NA	NA	NA	NA	NA	NA	NA	NA	NA	NA	NA	NA	NA	NA	NA	NA	NA	NA	NA	NA	NA	NA	NA	NA	NA	NA	NA	NA	NA	NA	NA
response to sterol depletion	NA	NA	NA	NA	NA	NA	NA	NA	NA	NA	NA	9.1 (0.040872)	NA	NA	NA	NA	NA	NA	NA	NA	NA	NA	NA	NA	NA	NA	NA	NA	NA	NA	NA	NA	NA	NA	NA	NA	NA	NA	NA	NA	NA
response to toxic substance	NA	NA	NA	NA	NA	NA	2.4 (0.035681)	NA	NA	2.2 (0.019445)	NA	NA	NA	NA	NA	NA	NA	NA	NA	NA	NA	NA	NA	NA	NA	NA	NA	NA	NA	NA	NA	NA	NA	NA	NA	NA	NA	NA	NA	NA	NA
riboflavin synthase activity	20 (0.023256)	NA	NA	NA	NA	NA	NA	NA	NA	NA	NA	NA	NA	NA	NA	NA	NA	NA	NA	NA	NA	NA	NA	NA	NA	NA	NA	NA	NA	NA	NA	NA	NA	NA	NA	NA	NA	NA	NA	NA	NA
ribonucleoside triphosphate metabolic process	NA	NA	NA	NA	NA	NA	NA	NA	NA	NA	NA	NA	NA	NA	NA	NA	NA	NA	NA	NA	NA	NA	NA	NA	NA	NA	NA	NA	NA	3.5 (0.029874)	NA	NA	NA	NA	NA	NA	NA	NA	NA	NA	NA
ribosylnicotinamide kinase activity	NA	NA	NA	NA	NA	NA	NA	NA	NA	16.7 (0.020576)	NA	9.1 (0.032922)	NA	NA	NA	NA	NA	NA	NA	NA	NA	NA	NA	NA	NA	NA	8.3 (0.045267)	NA	NA	NA	NA	NA	NA	NA	NA	NA	NA	NA	NA	NA	NA
secondary active transmembrane transporter activity	NA	NA	NA	NA	NA	NA	2.6 (0.043101)	NA	NA	NA	NA	NA	NA	NA	NA	NA	NA	NA	NA	NA	NA	2.5 (0.004789)	NA	NA	NA	NA	NA	NA	NA	NA	NA	NA	NA	NA	NA	NA	NA	NA	NA	NA	NA
selenocysteinyl-tRNA(Sec) biosynthetic process	NA	NA	NA	NA	NA	NA	NA	NA	NA	NA	NA	NA	NA	NA	NA	NA	NA	NA	NA	NA	NA	NA	NA	NA	NA	NA	NA	NA	NA	NA	NA	NA	NA	NA	NA	NA	NA	12.5 (0.047619)	NA	NA	NA
serine hydrolase activity	NA	2.4 (0.036773)	NA	NA	NA	NA	NA	NA	NA	NA	NA	NA	NA	NA	NA	NA	NA	NA	NA	NA	NA	NA	NA	NA	NA	NA	NA	NA	NA	NA	NA	NA	NA	NA	NA	NA	NA	NA	NA	NA	NA
serine-tRNA ligase activity	NA	NA	NA	NA	NA	NA	NA	NA	NA	NA	NA	NA	NA	NA	NA	NA	NA	NA	NA	NA	NA	NA	NA	NA	NA	NA	NA	NA	NA	NA	NA	NA	NA	NA	NA	NA	NA	12.5 (0.028571)	NA	NA	NA
short-chain fatty acid metabolic process	NA	NA	NA	NA	NA	NA	NA	NA	NA	NA	NA	NA	NA	NA	NA	NA	3.8 (0.046264)	NA	NA	NA	NA	NA	NA	NA	NA	NA	NA	NA	NA	NA	NA	NA	NA	NA	NA	NA	NA	NA	NA	NA	NA
sialic acid transport	NA	NA	NA	NA	NA	NA	NA	NA	NA	NA	NA	NA	NA	NA	NA	NA	NA	NA	100 (0.017241)	NA	NA	NA	NA	NA	NA	NA	NA	NA	NA	NA	NA	NA	NA	NA	NA	NA	NA	NA	NA	NA	NA
siderophore transport	NA	12 (0.043956)	NA	NA	NA	NA	NA	NA	8.1 (0.043956)	8.3 (0.043956)	NA	4.4 (0.043956)	5.5 (0.001998)	NA	3 (0.046953)	NA	NA	NA	NA	19 (0.010989)	3.5 (0.043956)	NA	NA	NA	NA	NA	5.5 (0.010989)	NA	NA	NA	NA	NA	NA	NA	NA	NA	NA	NA	NA	NA	NA
signaling receptor binding	NA	NA	NA	NA	NA	NA	NA	4.2 (0.003512)	NA	NA	NA	NA	2.2 (0.008148)	NA	NA	NA	2.6 (0.04956)	NA	NA	NA	2.3 (0.007736)	2.5 (0.048465)	NA	20 (0.001238)	NA	NA	NA	2.3 (0.034272)	NA	NA	NA	NA	NA	NA	NA	NA	3.8 (0.043662)	NA	NA	NA	NA
single strand break repair	NA	NA	NA	NA	NA	NA	NA	NA	NA	NA	NA	4.3 (0.042027)	NA	NA	NA	NA	NA	NA	NA	NA	NA	NA	NA	NA	NA	NA	NA	NA	NA	NA	NA	NA	NA	NA	NA	NA	NA	NA	NA	NA	NA
single-stranded RNA binding	NA	NA	NA	NA	NA	2.6 (0.006278)	NA	NA	NA	NA	NA	NA	NA	NA	NA	NA	NA	NA	NA	NA	NA	NA	NA	NA	NA	NA	NA	NA	NA	NA	NA	NA	NA	NA	NA	NA	NA	NA	NA	NA	NA
small molecule binding	NA	NA	NA	NA	NA	NA	NA	NA	NA	NA	NA	NA	NA	NA	NA	NA	NA	NA	NA	NA	NA	NA	NA	NA	NA	NA	NA	NA	NA	NA	2.4 (0.010049)	NA	NA	NA	NA	NA	NA	NA	NA	NA	NA
small molecule metabolic process	NA	NA	NA	NA	NA	NA	NA	NA	NA	NA	NA	NA	NA	NA	NA	NA	NA	NA	NA	NA	NA	NA	NA	NA	NA	NA	NA	NA	NA	NA	2.4 (0.021874)	NA	NA	NA	NA	NA	NA	NA	NA	NA	NA
snRNA binding	NA	3.6 (0.027869)	NA	NA	NA	NA	NA	NA	NA	NA	NA	NA	NA	NA	NA	NA	NA	NA	NA	NA	NA	NA	NA	NA	NA	NA	NA	NA	NA	NA	NA	NA	NA	NA	NA	NA	NA	NA	NA	NA	NA
snRNA transcription	NA	NA	NA	NA	NA	NA	NA	NA	NA	NA	NA	NA	NA	NA	NA	NA	11.1 (0.04918)	NA	NA	NA	NA	NA	NA	NA	NA	NA	NA	NA	NA	NA	NA	NA	NA	NA	NA	NA	NA	NA	NA	NA	NA
soladodine glucosyltransferase activity	NA	NA	NA	NA	NA	NA	NA	NA	NA	NA	NA	NA	NA	NA	NA	NA	NA	NA	NA	NA	NA	NA	NA	NA	NA	NA	NA	7.1 (0.041667)	NA	NA	NA	NA	NA	NA	NA	NA	NA	NA	NA	NA	NA
spermidine synthase activity	NA	NA	NA	NA	NA	NA	NA	NA	NA	NA	NA	9.1 (0.023256)	NA	NA	NA	NA	NA	NA	NA	NA	NA	NA	NA	NA	NA	NA	NA	NA	NA	NA	NA	NA	NA	NA	NA	NA	NA	NA	NA	NA	NA
spliceosomal complex	NA	2.2 (0.009541)	NA	NA	NA	NA	NA	NA	NA	NA	NA	NA	NA	NA	NA	NA	NA	NA	NA	NA	NA	NA	NA	NA	NA	NA	NA	NA	NA	NA	NA	NA	NA	NA	NA	NA	NA	NA	NA	NA	NA
spore membrane bending pathway	NA	NA	NA	NA	NA	NA	NA	NA	NA	NA	NA	NA	NA	NA	NA	NA	NA	NA	NA	28.6 (0.028571)	NA	NA	NA	NA	NA	NA	NA	NA	NA	NA	NA	NA	NA	NA	NA	NA	NA	NA	NA	NA	NA
spore wall	NA	NA	NA	5.5 (0.042035)	5.9 (0.02572)	NA	NA	NA	NA	NA	NA	NA	NA	NA	NA	NA	NA	NA	NA	NA	NA	NA	NA	NA	NA	NA	NA	NA	NA	NA	NA	NA	NA	NA	NA	NA	NA	4.1 (0.023082)	NA	NA	NA
sporulation	NA	NA	NA	NA	NA	2.5 (0.00412)	3.9 (0.001093)	NA	NA	NA	NA	NA	NA	NA	NA	NA	NA	NA	NA	NA	NA	NA	NA	NA	NA	NA	NA	NA	NA	NA	NA	NA	NA	NA	NA	NA	NA	NA	NA	NA	NA
steroid metabolic process	NA	NA	NA	NA	NA	NA	NA	NA	NA	NA	NA	NA	NA	NA	NA	NA	2.2 (0.027301)	NA	NA	NA	NA	NA	NA	NA	NA	NA	NA	NA	NA	NA	NA	NA	NA	NA	NA	NA	NA	NA	NA	NA	NA
storage vacuole	NA	NA	NA	NA	NA	NA	NA	NA	NA	NA	NA	NA	NA	NA	NA	NA	NA	NA	NA	NA	NA	NA	NA	2.3 (0.020984)	NA	NA	NA	NA	NA	NA	NA	NA	NA	NA	NA	NA	NA	NA	NA	NA	NA
stress-induced homeostatically regulated protein degradation pathway	NA	NA	NA	NA	NA	NA	NA	NA	NA	NA	NA	NA	NA	NA	NA	NA	NA	NA	NA	NA	NA	NA	NA	NA	NA	NA	NA	NA	NA	2.1 (0.023469)	NA	NA	NA	NA	NA	NA	NA	NA	NA	NA	NA
succinate dehydrogenase activity	NA	NA	NA	NA	NA	NA	NA	5.5 (0.011966)	NA	NA	NA	NA	NA	NA	NA	NA	NA	NA	NA	NA	NA	NA	NA	NA	NA	NA	NA	NA	NA	3 (0.023908)	NA	NA	NA	NA	NA	NA	NA	NA	NA	NA	NA
succinate-semialdehyde dehydrogenase [NAD(P)+] activity	NA	NA	NA	NA	NA	NA	NA	NA	16.7 (0.04878)	NA	NA	NA	NA	NA	NA	NA	NA	NA	NA	NA	NA	NA	NA	NA	NA	NA	NA	NA	NA	NA	NA	NA	NA	NA	NA	NA	NA	NA	NA	NA	NA
sulfur amino acid metabolic process	NA	NA	NA	NA	NA	NA	NA	NA	NA	NA	NA	NA	NA	NA	NA	NA	2.4 (0.009104)	NA	NA	NA	NA	NA	NA	NA	NA	NA	NA	NA	NA	NA	NA	NA	NA	NA	NA	NA	NA	NA	NA	NA	NA
sulfur compound binding	NA	NA	NA	NA	NA	NA	5.4 (0.003521)	NA	NA	NA	NA	NA	NA	NA	NA	NA	NA	NA	NA	NA	NA	3 (0.006249)	NA	NA	50 (0.020201)	2.1 (0.009677)	NA	NA	NA	NA	25 (0.040021)	NA	NA	NA	NA	NA	NA	NA	NA	NA	NA
sulfur compound metabolic process	NA	NA	NA	NA	NA	NA	NA	NA	NA	NA	NA	NA	NA	NA	NA	NA	NA	NA	NA	NA	NA	NA	NA	NA	NA	NA	NA	NA	NA	NA	7.9 (0.002984)	NA	NA	NA	NA	NA	NA	NA	NA	NA	NA
sulfur compound transport	NA	NA	NA	NA	NA	NA	NA	NA	NA	2.3 (0.047477)	NA	NA	NA	NA	NA	NA	NA	NA	NA	NA	NA	NA	3.7 (0.026407)	NA	NA	NA	NA	NA	NA	NA	NA	NA	NA	NA	NA	NA	NA	NA	NA	NA	NA
sulfuric ester hydrolase activity	NA	NA	NA	NA	NA	NA	NA	NA	NA	NA	NA	NA	NA	NA	NA	NA	NA	NA	NA	NA	NA	NA	NA	NA	NA	NA	NA	NA	NA	NA	NA	10 (0.045001)	NA	NA	NA	NA	NA	NA	NA	NA	NA
symporter activity	NA	NA	NA	NA	NA	NA	NA	NA	NA	NA	NA	NA	NA	NA	NA	NA	2.7 (0.02365)	NA	NA	NA	NA	NA	NA	NA	NA	NA	NA	NA	NA	NA	NA	NA	NA	NA	NA	NA	NA	NA	NA	NA	NA
synaptonemal complex organization	NA	NA	NA	2.7 (0.000273)	4.4 (1e-06)	5.2 (2.1e-05)	3.4 (0.022996)	NA	NA	NA	NA	NA	NA	NA	NA	NA	NA	NA	NA	NA	NA	4.2 (0.000475)	NA	NA	NA	NA	NA	NA	NA	NA	NA	NA	NA	NA	NA	NA	NA	NA	NA	NA	NA
telomerase holoenzyme complex	NA	NA	NA	NA	NA	NA	NA	NA	NA	2.1 (0.03653)	NA	NA	NA	NA	NA	NA	NA	NA	NA	NA	NA	NA	NA	NA	NA	NA	NA	NA	NA	NA	NA	NA	NA	NA	NA	8.3 (0.03653)	NA	NA	NA	NA	NA
tetrapyrrole binding	NA	NA	NA	NA	NA	NA	NA	3.3 (0.000204)	NA	NA	NA	NA	NA	NA	NA	NA	NA	NA	NA	NA	NA	NA	NA	NA	NA	NA	NA	NA	NA	NA	NA	2.2 (0.017346)	NA	NA	NA	NA	NA	NA	NA	NA	NA
transcription elongation factor complex	NA	NA	NA	NA	NA	NA	NA	NA	2.8 (0.021761)	NA	NA	NA	NA	NA	NA	NA	NA	NA	NA	NA	NA	NA	NA	NA	NA	NA	NA	NA	NA	NA	NA	NA	NA	NA	NA	NA	NA	NA	NA	NA	NA
transcription factor TFIIH holo complex binding	NA	NA	NA	NA	NA	NA	NA	12.5 (0.034483)	NA	NA	NA	NA	6.7 (0.024631)	NA	NA	NA	NA	NA	NA	NA	NA	NA	NA	NA	NA	NA	NA	NA	NA	NA	NA	NA	NA	NA	NA	NA	16.7 (0.039409)	12.5 (0.004926)	5.9 (0.044335)	NA	NA
transcription repressor complex	NA	NA	NA	NA	NA	NA	NA	NA	NA	NA	NA	NA	NA	12.5 (0.038462)	NA	NA	NA	NA	NA	NA	NA	NA	NA	NA	NA	NA	NA	NA	NA	2.6 (0.036721)	NA	NA	NA	NA	NA	NA	NA	NA	NA	NA	NA
transcription-coupled nucleotide-excision repair	NA	NA	NA	NA	NA	NA	NA	NA	5.1 (0.003684)	NA	NA	NA	NA	NA	NA	NA	NA	NA	NA	NA	NA	NA	NA	NA	NA	NA	NA	NA	NA	NA	NA	NA	NA	NA	NA	NA	NA	NA	NA	NA	NA
transcriptionally active chromatin	NA	NA	NA	NA	NA	NA	NA	NA	9.3 (7.1e-05)	NA	NA	NA	NA	NA	NA	NA	NA	NA	NA	NA	NA	NA	NA	NA	NA	NA	NA	NA	NA	NA	NA	NA	NA	NA	NA	NA	NA	NA	NA	NA	NA
transferase activity, transferring nitrogenous groups	NA	NA	NA	NA	NA	NA	NA	NA	2.2 (0.025117)	NA	NA	NA	NA	NA	NA	NA	NA	NA	NA	NA	NA	NA	3.7 (0.019726)	8 (0.001448)	NA	NA	NA	NA	NA	NA	NA	NA	NA	NA	NA	NA	NA	NA	NA	NA	NA
transition metal ion transport	NA	NA	NA	NA	NA	NA	NA	NA	NA	2.4 (0.032584)	NA	NA	NA	NA	NA	NA	NA	NA	NA	NA	NA	NA	NA	NA	NA	NA	NA	NA	NA	NA	NA	NA	NA	NA	NA	NA	NA	NA	NA	NA	NA
transketolase or transaldolase activity	NA	NA	NA	NA	2.2 (0.042616)	3.8 (0.017935)	NA	NA	NA	NA	NA	NA	NA	NA	NA	NA	NA	NA	NA	NA	NA	NA	NA	NA	NA	NA	2.2 (0.023625)	NA	NA	NA	NA	NA	NA	NA	NA	NA	NA	NA	NA	NA	2.7 (0.017577)
translation elongation factor activity	NA	NA	NA	NA	NA	NA	NA	NA	NA	NA	NA	NA	NA	8.3 (0.049774)	NA	NA	NA	NA	NA	NA	NA	NA	NA	NA	NA	NA	NA	NA	NA	NA	NA	NA	NA	NA	NA	NA	NA	NA	NA	NA	NA
translational frameshifting	NA	NA	NA	NA	NA	NA	4.5 (0.024071)	NA	NA	NA	NA	NA	NA	NA	NA	NA	NA	4.3 (0.024071)	NA	4.8 (0.047658)	NA	NA	NA	14.3 (0.012097)	NA	2.6 (0.012097)	NA	NA	NA	NA	NA	NA	NA	NA	NA	NA	NA	NA	NA	NA	NA
transmembrane transport	NA	NA	NA	NA	NA	NA	NA	NA	NA	NA	NA	NA	NA	NA	NA	NA	NA	NA	NA	NA	NA	NA	NA	2.1 (0.001415)	NA	NA	NA	NA	NA	NA	NA	NA	NA	NA	NA	NA	NA	NA	NA	NA	NA
transporter activity	NA	NA	NA	NA	NA	NA	NA	NA	NA	NA	NA	NA	NA	NA	NA	NA	NA	NA	NA	NA	NA	NA	NA	2.5 (0.001658)	6.8 (0.031164)	NA	NA	NA	NA	NA	NA	NA	NA	NA	NA	NA	NA	NA	NA	NA	NA
transporter complex	NA	NA	NA	NA	NA	NA	NA	2.8 (6e-06)	NA	NA	NA	NA	NA	NA	NA	NA	NA	NA	NA	NA	NA	NA	NA	NA	NA	NA	NA	NA	NA	2.1 (2e-06)	NA	NA	NA	NA	NA	NA	NA	NA	NA	NA	NA
trehalose-phosphatase activity	NA	NA	NA	NA	NA	NA	NA	NA	NA	NA	NA	NA	NA	NA	NA	NA	8.6 (0.024242)	NA	NA	NA	NA	NA	NA	NA	NA	NA	NA	NA	NA	3.9 (0.024242)	NA	NA	NA	NA	NA	NA	NA	NA	NA	NA	NA
tricarboxylic acid cycle enzyme complex	NA	NA	NA	NA	NA	NA	NA	NA	NA	NA	NA	NA	2.6 (0.000122)	NA	NA	NA	2.3 (0.026284)	NA	NA	NA	NA	2.2 (0.046105)	4 (0.026585)	NA	NA	NA	NA	NA	NA	4.2 (0)	NA	NA	NA	NA	NA	NA	NA	NA	NA	NA	NA
tricarboxylic acid metabolic process	4.8 (0.049751)	NA	NA	NA	NA	NA	NA	NA	NA	NA	NA	NA	3.3 (0.003179)	NA	NA	NA	NA	NA	NA	NA	NA	NA	NA	NA	NA	NA	NA	NA	NA	3.3 (0.005184)	NA	NA	NA	NA	NA	NA	NA	NA	NA	NA	NA
tubulin complex	NA	NA	NA	NA	NA	NA	NA	NA	NA	5.6 (0.047994)	NA	NA	NA	NA	NA	NA	NA	NA	NA	NA	NA	NA	NA	33.3 (0.024194)	NA	NA	NA	NA	NA	NA	NA	NA	NA	NA	NA	NA	NA	NA	NA	NA	NA
ubiquitin conjugating enzyme complex	4.8 (0.030827)	NA	NA	NA	NA	NA	NA	NA	NA	NA	NA	NA	NA	NA	NA	NA	NA	NA	NA	NA	NA	NA	NA	NA	NA	NA	NA	NA	NA	NA	NA	NA	NA	NA	NA	NA	NA	NA	NA	NA	NA
ubiquitin-like protein conjugating enzyme binding	NA	NA	6.2 (0.024194)	NA	NA	NA	NA	NA	NA	NA	NA	NA	NA	NA	NA	NA	NA	NA	NA	NA	NA	NA	NA	NA	NA	NA	NA	NA	NA	NA	NA	NA	NA	NA	NA	NA	NA	NA	NA	NA	NA
unsaturated fatty acid metabolic process	NA	NA	NA	NA	NA	NA	NA	NA	NA	NA	NA	NA	NA	50 (0.033333)	NA	NA	NA	NA	NA	NA	NA	NA	NA	NA	NA	NA	NA	NA	9.1 (0.033333)	NA	NA	NA	NA	NA	NA	NA	NA	NA	NA	NA	NA
uridylyltransferase activity	6.2 (0.028037)	NA	NA	NA	NA	7.1 (0.028037)	NA	NA	NA	NA	NA	NA	NA	NA	NA	NA	NA	NA	NA	NA	NA	7.7 (0.028037)	NA	NA	NA	NA	NA	NA	NA	NA	NA	NA	7.1 (0.028037)	6.7 (0.028037)	NA	NA	NA	NA	NA	NA	NA
uroporphyrinogen-III synthase activity	20 (0.037736)	25 (0.037736)	NA	NA	NA	NA	NA	NA	NA	NA	NA	NA	NA	NA	NA	NA	NA	NA	NA	NA	7.1 (0.037736)	NA	NA	NA	NA	16.7 (0.018868)	NA	NA	NA	NA	NA	NA	NA	20 (0.018868)	NA	NA	NA	NA	NA	NA	NA
vacuolar lumen	NA	NA	NA	NA	NA	NA	3 (0.047222)	NA	NA	NA	NA	NA	NA	NA	NA	NA	2.6 (0.040104)	NA	NA	NA	NA	NA	NA	NA	NA	NA	NA	NA	NA	NA	NA	NA	NA	NA	NA	NA	NA	NA	NA	NA	NA
vacuolar transporter chaperone complex	NA	NA	NA	NA	NA	NA	NA	NA	12.9 (0.004995)	NA	NA	NA	NA	NA	NA	NA	NA	15 (0.027473)	NA	NA	NA	NA	NA	NA	NA	9.4 (0.027473)	NA	NA	NA	NA	NA	NA	NA	NA	NA	NA	NA	NA	NA	NA	NA
vacuole-isolation membrane contact site	NA	NA	NA	NA	NA	NA	NA	NA	NA	NA	NA	NA	NA	NA	NA	NA	NA	NA	NA	NA	NA	NA	NA	NA	NA	NA	NA	2.3 (0.00592)	NA	NA	NA	NA	NA	NA	NA	NA	NA	NA	NA	NA	NA
very-long-chain 3-ketoacyl-CoA synthase activity	NA	NA	NA	NA	NA	NA	NA	NA	NA	NA	NA	NA	NA	25 (0.037912)	NA	NA	NA	NA	NA	NA	NA	NA	NA	NA	NA	NA	NA	6.9 (0.005128)	NA	NA	NA	NA	NA	NA	NA	NA	NA	NA	NA	NA	NA
viral process	NA	NA	NA	NA	NA	NA	NA	NA	NA	NA	NA	NA	NA	NA	NA	3.6 (0.022681)	NA	NA	NA	NA	NA	NA	NA	NA	NA	NA	NA	NA	NA	NA	NA	NA	NA	NA	NA	NA	NA	NA	NA	NA	NA
vitamin binding	NA	NA	NA	NA	NA	NA	NA	NA	NA	NA	NA	NA	NA	NA	NA	NA	NA	NA	NA	NA	NA	NA	3.4 (0.0072)	7.4 (0.000257)	NA	NA	NA	NA	NA	NA	14.3 (0.039044)	NA	NA	NA	NA	NA	NA	NA	NA	2.5 (0.007337)	NA
vitamin transport	NA	NA	NA	NA	NA	NA	NA	NA	NA	NA	NA	NA	NA	NA	NA	NA	NA	4.7 (0.015725)	NA	NA	NA	NA	NA	NA	NA	NA	2.2 (0.034576)	NA	NA	NA	NA	NA	NA	NA	NA	NA	NA	NA	NA	NA	NA
xenobiotic transport	NA	NA	NA	NA	2.2 (0.048894)	NA	NA	NA	NA	NA	NA	NA	NA	9.1 (0.009739)	NA	NA	NA	NA	NA	NA	NA	NA	NA	NA	NA	NA	2.2 (0.034576)	NA	NA	NA	NA	NA	NA	NA	NA	NA	NA	NA	NA	NA	NA

## Sheet: Down Diff. Transcribed Genes
term	bre1	bur2	bye1	cac1	cac2	cac3	cbc1	ccr4	cdc39	cdc73	chd1	ctr9	dhh1	dst1	eaf1	elf1	gcn5	hda1	hpc2	htz1	ino80	isw1	isw2	leo1	nap1	npl3	paf1	rad6	rco1	rpb4	rph1	rsc30	rtf1	rtt103	set2	set3	spt4	swr1	ubp8	vps15	vps34
1,4-alpha-glucan branching enzyme activity	NA	NA	NA	NA	NA	NA	NA	NA	NA	NA	NA	NA	NA	NA	NA	NA	NA	NA	NA	NA	NA	NA	100 (0.013889)	NA	NA	NA	NA	NA	NA	NA	NA	NA	NA	NA	NA	NA	NA	NA	NA	NA	NA
1,4-alpha-glucan branching enzyme activity (using a glucosylated glycogenin as primer for glycogen synthesis)	NA	NA	NA	NA	NA	NA	NA	NA	NA	NA	NA	NA	NA	NA	NA	NA	NA	NA	NA	NA	NA	NA	100 (0.013889)	NA	NA	NA	NA	NA	NA	NA	NA	NA	NA	NA	NA	NA	NA	NA	NA	NA	NA
2-hydroxy-3-keto-5-methylthiopentenyl-1-phosphate phosphatase activity	NA	NA	NA	NA	NA	NA	NA	NA	NA	NA	NA	NA	NA	NA	NA	NA	NA	NA	NA	NA	NA	NA	NA	NA	NA	NA	NA	NA	NA	NA	NA	NA	NA	NA	NA	NA	NA	33.3 (0.014085)	NA	NA	NA
3-dehydrosphinganine reductase activity	NA	NA	NA	NA	NA	NA	NA	NA	NA	NA	NA	NA	NA	NA	NA	NA	NA	NA	NA	NA	NA	NA	NA	NA	NA	NA	NA	NA	NA	NA	NA	NA	NA	NA	NA	NA	NA	NA	20 (0.040541)	NA	NA
3-isopropylmalate dehydratase complex	NA	NA	NA	NA	NA	NA	NA	NA	NA	NA	NA	25 (0.029412)	16.7 (0.009804)	NA	NA	NA	NA	NA	NA	NA	NA	NA	NA	NA	NA	NA	20 (0.029412)	NA	NA	8.3 (0.009804)	NA	NA	NA	NA	NA	NA	NA	NA	NA	NA	14.3 (0.019608)
4-hydroxyphenylpyruvate decarboxylase activity	NA	NA	NA	NA	NA	NA	NA	NA	NA	NA	NA	NA	16.7 (0.043478)	NA	NA	NA	NA	NA	NA	NA	NA	NA	NA	NA	NA	NA	NA	NA	NA	NA	NA	NA	NA	NA	NA	NA	NA	NA	NA	NA	NA
5-amino-4-imidazole carboxylate lyase activity	NA	NA	NA	NA	NA	NA	NA	NA	NA	NA	NA	NA	NA	NA	25 (0.043478)	NA	NA	NA	NA	NA	NA	NA	NA	NA	NA	NA	NA	NA	NA	NA	NA	NA	NA	NA	NA	NA	NA	NA	NA	NA	NA
5-methyltetrahydropteroyltri-L-glutamate-dependent methyltransferase activity	NA	NA	NA	NA	NA	NA	NA	NA	NA	NA	NA	25 (0.040816)	NA	NA	NA	NA	NA	NA	NA	NA	NA	NA	NA	NA	NA	NA	NA	NA	NA	NA	NA	NA	NA	NA	NA	NA	NA	NA	NA	NA	14.3 (0.010204)
6,7-dimethyl-8-ribityllumazine synthase activity	NA	NA	NA	NA	NA	NA	NA	NA	NA	NA	NA	NA	NA	NA	25 (0.046512)	NA	NA	NA	NA	NA	NA	NA	NA	NA	NA	NA	NA	NA	NA	NA	NA	NA	NA	NA	NA	NA	NA	NA	NA	NA	NA
ATP metabolic process	NA	NA	NA	2.1 (0.023424)	NA	NA	3.1 (0.048158)	NA	NA	NA	NA	NA	NA	NA	NA	NA	NA	NA	NA	NA	NA	NA	NA	NA	NA	NA	3.2 (2e-06)	NA	NA	NA	NA	NA	NA	NA	5.2 (0.01371)	NA	NA	NA	NA	NA	NA
ATPase binding	NA	NA	NA	NA	NA	NA	NA	NA	NA	NA	NA	NA	NA	NA	NA	NA	NA	NA	NA	11.1 (0.035997)	NA	NA	NA	NA	NA	NA	NA	NA	NA	NA	NA	NA	NA	NA	NA	NA	NA	NA	NA	NA	NA
BLOC complex	NA	NA	NA	NA	NA	NA	NA	NA	NA	NA	NA	NA	NA	NA	NA	NA	NA	NA	NA	NA	NA	NA	NA	NA	NA	NA	NA	NA	NA	NA	NA	3.8 (0.026344)	NA	NA	NA	NA	NA	5.3 (0.039297)	NA	NA	NA
CAF-1 complex	NA	NA	NA	20 (0.02511)	20 (0.013346)	20 (0.007429)	NA	NA	NA	NA	NA	NA	NA	NA	NA	NA	NA	NA	NA	NA	NA	NA	NA	NA	NA	NA	NA	NA	NA	NA	NA	NA	NA	NA	NA	NA	NA	NA	NA	NA	NA
CDP-diacylglycerol metabolic process	NA	NA	NA	NA	NA	11.1 (0.040984)	NA	NA	NA	NA	NA	NA	NA	NA	10.5 (0.012879)	NA	NA	NA	NA	NA	NA	NA	NA	NA	NA	NA	NA	NA	NA	NA	NA	NA	NA	NA	NA	NA	NA	NA	NA	NA	NA
COP9 signalosome	NA	NA	NA	NA	NA	NA	NA	NA	NA	NA	NA	NA	NA	NA	NA	NA	NA	NA	NA	5 (0.036266)	NA	NA	NA	NA	NA	NA	NA	NA	NA	NA	NA	NA	NA	NA	NA	NA	NA	NA	NA	NA	NA
CTP synthase activity	NA	NA	NA	NA	NA	NA	NA	NA	NA	NA	NA	NA	NA	NA	NA	NA	NA	NA	NA	NA	NA	NA	NA	NA	NA	NA	NA	12.5 (0.027027)	NA	NA	NA	NA	NA	NA	NA	NA	NA	NA	NA	NA	NA
CUT metabolic process	NA	NA	NA	NA	NA	NA	NA	NA	NA	NA	NA	NA	NA	NA	NA	NA	NA	NA	NA	NA	NA	33.3 (0.030635)	NA	NA	NA	NA	NA	NA	NA	NA	NA	NA	NA	NA	NA	NA	NA	NA	NA	NA	NA
Cbf1-Met4-Met28 complex	NA	NA	NA	NA	NA	NA	NA	NA	NA	9.1 (0.039682)	NA	NA	NA	NA	NA	NA	NA	NA	NA	NA	NA	NA	NA	NA	NA	NA	NA	NA	NA	NA	NA	NA	NA	NA	NA	NA	NA	NA	NA	NA	NA
Cvt complex	NA	NA	NA	NA	NA	NA	NA	NA	NA	NA	NA	NA	NA	NA	NA	NA	NA	NA	NA	8.3 (0.03707)	NA	NA	NA	NA	NA	NA	NA	NA	NA	NA	NA	NA	NA	NA	NA	NA	NA	NA	NA	NA	NA
D-loop DNA binding	NA	NA	NA	NA	NA	NA	NA	NA	NA	NA	NA	NA	NA	NA	NA	NA	NA	NA	NA	33.3 (0.003623)	NA	NA	NA	NA	NA	NA	NA	NA	NA	NA	NA	NA	NA	NA	NA	NA	NA	NA	NA	NA	NA
DNA dephosphorylation	NA	NA	NA	NA	NA	NA	NA	NA	NA	NA	NA	NA	16.7 (0.00625)	NA	NA	NA	NA	NA	NA	NA	NA	NA	NA	NA	NA	NA	20 (0.03125)	12.5 (0.00625)	NA	NA	NA	NA	NA	NA	NA	NA	NA	NA	NA	NA	NA
DNA end binding	NA	NA	NA	NA	NA	NA	NA	NA	NA	NA	NA	NA	NA	NA	NA	NA	NA	NA	NA	NA	4.8 (0.032024)	NA	NA	NA	NA	NA	NA	NA	NA	NA	NA	NA	NA	NA	NA	NA	NA	NA	NA	NA	NA
DNA ligase IV complex	NA	NA	NA	NA	NA	NA	NA	NA	NA	NA	NA	NA	NA	NA	NA	NA	NA	NA	NA	NA	3.1 (0.027307)	NA	NA	NA	NA	NA	NA	NA	NA	NA	NA	NA	NA	NA	NA	NA	NA	NA	NA	NA	NA
DNA ligation	NA	NA	NA	NA	NA	NA	NA	NA	NA	NA	NA	NA	NA	NA	NA	NA	NA	NA	NA	NA	2.4 (0.017917)	NA	NA	NA	NA	NA	NA	NA	NA	NA	NA	NA	NA	NA	NA	NA	NA	NA	NA	NA	NA
DNA modification	NA	NA	NA	NA	NA	NA	NA	NA	NA	9.1 (0.043791)	NA	NA	NA	NA	NA	NA	NA	NA	NA	NA	NA	NA	NA	NA	NA	NA	NA	NA	NA	NA	NA	NA	NA	NA	NA	NA	NA	NA	NA	NA	NA
DNA packaging complex	NA	NA	NA	10.3 (0.000261)	7.7 (0.002061)	NA	7.7 (0.039115)	NA	NA	5.3 (0.001071)	NA	8.7 (0)	NA	10 (0.039115)	NA	NA	NA	NA	NA	NA	NA	NA	NA	NA	NA	NA	8.3 (0)	5.4 (0)	NA	NA	NA	NA	NA	NA	NA	NA	NA	NA	NA	NA	NA
DNA repair complex	NA	NA	NA	NA	NA	NA	NA	NA	NA	NA	NA	NA	NA	NA	NA	NA	NA	NA	NA	2.3 (0.031322)	NA	NA	NA	NA	NA	NA	NA	NA	NA	NA	NA	NA	NA	NA	NA	NA	NA	NA	NA	NA	NA
DNA replication-dependent chromatin organization	NA	NA	NA	NA	14.3 (0.042397)	14.3 (0.014286)	NA	NA	NA	NA	NA	NA	NA	NA	NA	NA	NA	NA	NA	NA	NA	NA	NA	NA	NA	NA	NA	NA	NA	NA	NA	NA	NA	NA	NA	NA	NA	NA	NA	NA	NA
DNA replication-independent chromatin organization	NA	NA	NA	NA	NA	NA	NA	NA	NA	NA	NA	NA	NA	NA	NA	NA	NA	NA	100 (0.021429)	NA	NA	NA	NA	NA	NA	NA	NA	NA	NA	NA	NA	NA	NA	NA	NA	NA	NA	NA	NA	NA	NA
DNA secondary structure binding	NA	NA	NA	NA	NA	NA	NA	NA	NA	NA	NA	NA	NA	NA	NA	NA	NA	NA	NA	2.9 (0.043809)	NA	NA	NA	NA	NA	NA	NA	NA	NA	NA	NA	NA	NA	NA	NA	NA	NA	NA	NA	NA	NA
DNA-3'-diphospho-5'-guanosine diphosphatase	NA	NA	NA	NA	NA	NA	NA	NA	NA	NA	NA	25 (0.039773)	NA	NA	NA	NA	NA	NA	NA	NA	NA	NA	NA	NA	NA	NA	NA	NA	NA	NA	NA	NA	NA	NA	NA	NA	NA	NA	NA	NA	NA
DSIF complex	NA	NA	NA	NA	NA	NA	NA	NA	NA	NA	NA	NA	NA	NA	NA	NA	NA	NA	NA	NA	NA	NA	NA	NA	NA	NA	NA	NA	NA	NA	NA	NA	NA	NA	NA	NA	25 (0.043478)	NA	20 (0.043478)	NA	NA
DUBm complex	NA	NA	NA	NA	NA	NA	NA	NA	NA	NA	14.3 (0.026212)	NA	NA	NA	NA	NA	NA	NA	NA	NA	NA	NA	NA	NA	NA	NA	NA	NA	NA	NA	NA	NA	NA	NA	NA	NA	NA	NA	NA	NA	NA
ER-nucleus signaling pathway	NA	NA	NA	NA	NA	NA	NA	NA	NA	NA	NA	25 (0.01292)	NA	NA	NA	NA	NA	NA	NA	NA	NA	NA	NA	NA	NA	NA	NA	NA	NA	NA	NA	NA	NA	NA	NA	NA	NA	NA	NA	NA	NA
ESCRT complex	NA	NA	NA	NA	NA	NA	NA	NA	NA	3.7 (0.022552)	NA	NA	NA	NA	NA	NA	NA	NA	NA	NA	NA	NA	NA	NA	NA	NA	NA	NA	NA	NA	NA	NA	NA	NA	NA	NA	NA	NA	NA	NA	NA
FANCM-MHF complex	NA	NA	NA	NA	NA	NA	NA	NA	NA	NA	NA	NA	NA	NA	NA	NA	NA	NA	NA	NA	NA	NA	NA	NA	NA	NA	9.1 (0.046656)	NA	NA	NA	NA	NA	NA	NA	NA	NA	NA	NA	NA	NA	NA
Fanconi anaemia nuclear complex	NA	NA	NA	NA	NA	NA	NA	NA	NA	NA	NA	NA	NA	NA	NA	NA	NA	NA	NA	NA	NA	NA	NA	NA	NA	NA	9.1 (0.046656)	NA	NA	NA	NA	NA	NA	NA	NA	NA	NA	NA	NA	NA	NA
G protein-coupled receptor signaling pathway	NA	NA	NA	NA	NA	NA	NA	NA	NA	NA	NA	NA	NA	NA	NA	NA	NA	NA	NA	NA	NA	NA	NA	NA	NA	NA	NA	NA	NA	NA	NA	NA	NA	NA	10 (0.033592)	NA	NA	NA	NA	3.3 (0.033592)	NA
GDP-mannose metabolic process	NA	NA	NA	NA	NA	NA	NA	NA	NA	NA	NA	NA	NA	NA	NA	NA	NA	NA	NA	NA	NA	NA	NA	NA	NA	NA	NA	8.3 (0.038462)	NA	NA	NA	NA	NA	NA	NA	NA	NA	NA	NA	NA	NA
GID complex	NA	NA	NA	NA	NA	NA	NA	NA	NA	NA	NA	NA	NA	NA	NA	NA	NA	NA	NA	5 (0.04635)	NA	NA	NA	NA	NA	NA	NA	NA	NA	NA	NA	NA	NA	NA	NA	NA	NA	NA	NA	NA	NA
HIR complex	NA	NA	NA	NA	NA	NA	NA	NA	NA	NA	NA	NA	NA	NA	NA	NA	NA	NA	Inf (0.001489)	NA	NA	NA	NA	NA	NA	NA	NA	NA	NA	NA	NA	NA	NA	NA	NA	NA	NA	NA	NA	NA	NA
L-phosphoserine phosphatase activity	NA	NA	NA	NA	NA	NA	NA	NA	NA	NA	NA	NA	NA	NA	25 (0.028169)	NA	NA	NA	NA	NA	NA	NA	NA	NA	NA	NA	NA	NA	NA	NA	NA	NA	NA	NA	NA	NA	NA	NA	NA	NA	NA
MCM core complex	NA	NA	NA	2.8 (0.012109)	NA	NA	NA	NA	NA	NA	NA	2.4 (0.000862)	NA	NA	NA	NA	NA	NA	NA	NA	NA	NA	NA	NA	NA	NA	2.3 (0.000691)	NA	NA	NA	NA	NA	NA	NA	NA	NA	NA	NA	NA	NA	NA
MUB1-RAD6-UBR2 ubiquitin ligase complex	NA	NA	NA	NA	NA	NA	NA	NA	NA	NA	NA	NA	NA	NA	NA	NA	NA	NA	NA	NA	NA	NA	NA	NA	NA	NA	NA	4.2 (0.023165)	NA	NA	NA	NA	NA	NA	NA	NA	NA	NA	NA	NA	NA
MutSgamma complex	NA	NA	NA	NA	NA	NA	NA	NA	NA	NA	NA	NA	NA	NA	NA	NA	NA	NA	NA	33.3 (0.035714)	NA	NA	NA	NA	NA	NA	NA	NA	NA	NA	NA	NA	NA	NA	NA	NA	NA	NA	NA	NA	NA
N-terminal protein amino acid modification	NA	NA	NA	NA	NA	NA	NA	NA	NA	NA	NA	NA	NA	NA	NA	NA	NA	NA	NA	NA	NA	NA	NA	10 (0.04342)	NA	NA	NA	NA	NA	NA	NA	NA	NA	NA	NA	NA	NA	NA	NA	NA	NA
NAD binding	NA	NA	NA	NA	NA	NA	NA	NA	NA	NA	NA	NA	NA	NA	NA	NA	NA	NA	NA	NA	NA	NA	NA	NA	NA	NA	2.4 (0.010083)	NA	NA	NA	NA	NA	NA	NA	NA	NA	NA	NA	NA	NA	NA
NAD+ kinase activity	NA	NA	NA	NA	NA	NA	NA	NA	NA	NA	NA	NA	NA	NA	NA	NA	NA	NA	NA	NA	NA	NA	NA	NA	NA	NA	NA	NA	NA	NA	NA	NA	NA	NA	33.3 (0.032718)	NA	NA	NA	NA	NA	NA
NADH kinase activity	NA	NA	NA	NA	NA	NA	NA	NA	NA	NA	NA	NA	NA	NA	NA	NA	NA	NA	NA	NA	NA	NA	NA	NA	NA	NA	NA	NA	NA	NA	NA	NA	NA	NA	50 (0.024589)	NA	NA	NA	NA	NA	NA
NADP binding	NA	NA	NA	NA	8 (0.003133)	NA	NA	NA	NA	NA	NA	NA	NA	NA	NA	NA	NA	NA	NA	NA	NA	NA	NA	NA	NA	NA	2.5 (0.033387)	NA	NA	NA	NA	4.5 (0.00104)	NA	NA	NA	NA	NA	NA	NA	NA	NA
NADP metabolic process	NA	NA	NA	NA	NA	NA	NA	NA	NA	NA	NA	NA	NA	NA	NA	NA	NA	NA	NA	NA	NA	NA	NA	NA	NA	NA	NA	NA	NA	NA	NA	NA	NA	NA	12.5 (0.008258)	NA	NA	NA	NA	NA	NA
O-acyltransferase activity	NA	NA	NA	NA	NA	NA	NA	NA	NA	4.7 (0.023616)	NA	NA	NA	NA	NA	NA	NA	NA	NA	NA	NA	NA	NA	NA	NA	NA	NA	NA	NA	NA	NA	NA	NA	NA	NA	NA	NA	NA	NA	NA	NA
PcG protein complex	NA	NA	NA	NA	NA	NA	NA	NA	NA	14.3 (0.026058)	NA	11.1 (0.049215)	NA	NA	NA	NA	NA	NA	NA	NA	NA	NA	NA	NA	NA	NA	NA	NA	NA	NA	NA	NA	NA	NA	NA	NA	NA	NA	NA	NA	NA
R2TP complex	NA	NA	NA	NA	NA	NA	NA	NA	NA	NA	NA	NA	NA	NA	NA	NA	5.3 (0.037214)	NA	NA	NA	NA	NA	NA	NA	NA	NA	NA	NA	NA	NA	NA	NA	NA	NA	NA	NA	NA	NA	NA	NA	NA
RNA cap binding	NA	NA	NA	NA	NA	NA	20 (0.030926)	NA	NA	NA	NA	NA	NA	NA	NA	NA	NA	NA	NA	NA	NA	NA	NA	NA	NA	NA	NA	NA	NA	NA	NA	NA	NA	NA	NA	NA	NA	NA	NA	NA	NA
RNA cap binding complex	NA	NA	NA	NA	NA	NA	16.7 (0.017266)	NA	NA	NA	NA	NA	NA	NA	NA	NA	NA	NA	NA	NA	NA	NA	NA	NA	NA	NA	NA	NA	NA	NA	NA	NA	NA	NA	NA	NA	NA	NA	NA	NA	NA
RNA capping	NA	NA	NA	NA	NA	NA	12.5 (0.036131)	NA	NA	NA	NA	NA	NA	NA	NA	NA	NA	NA	NA	NA	NA	NA	NA	NA	NA	NA	NA	NA	NA	NA	NA	NA	NA	NA	NA	NA	NA	NA	NA	NA	NA
RNA phosphodiester bond hydrolysis	NA	NA	NA	NA	NA	NA	NA	NA	NA	NA	NA	NA	NA	NA	3.3 (0.017692)	NA	NA	NA	NA	NA	NA	NA	NA	NA	NA	NA	NA	NA	NA	NA	NA	NA	NA	NA	NA	NA	NA	NA	NA	NA	NA
RNA phosphodiester bond hydrolysis, exonucleolytic	NA	NA	NA	NA	NA	NA	NA	NA	NA	NA	NA	NA	NA	NA	NA	NA	NA	NA	NA	NA	NA	NA	NA	NA	NA	NA	NA	NA	NA	NA	NA	NA	NA	NA	NA	NA	NA	NA	2.6 (0.048492)	NA	NA
RNA polymerase II, core complex	NA	NA	NA	NA	NA	NA	NA	NA	NA	NA	NA	NA	4.3 (0.009391)	NA	11.1 (0.001455)	NA	NA	NA	NA	NA	NA	NA	NA	NA	NA	NA	NA	NA	NA	NA	NA	NA	NA	NA	NA	NA	NA	NA	7 (0.019135)	NA	NA
RNA polymerase III complex	NA	NA	NA	NA	NA	NA	NA	NA	NA	NA	NA	NA	3 (0.034407)	NA	10.9 (0.003836)	NA	NA	NA	NA	NA	NA	NA	NA	NA	NA	NA	NA	NA	NA	NA	NA	NA	NA	NA	NA	NA	NA	NA	NA	NA	NA
RNA polymerase complex	NA	NA	NA	NA	NA	NA	NA	NA	NA	NA	NA	NA	NA	NA	4.1 (0.014826)	NA	NA	NA	NA	NA	NA	NA	NA	NA	NA	NA	NA	NA	NA	NA	NA	NA	NA	NA	NA	NA	NA	NA	NA	NA	NA
RNA splicing, via endonucleolytic cleavage and ligation	NA	NA	NA	NA	NA	NA	NA	NA	NA	5.6 (0.005536)	NA	7 (0.001347)	NA	NA	NA	NA	NA	NA	NA	NA	NA	NA	NA	NA	NA	NA	NA	NA	NA	NA	NA	NA	NA	NA	NA	NA	NA	NA	NA	NA	NA
Rad6-Rad18 complex	NA	NA	NA	NA	NA	NA	NA	NA	NA	NA	NA	NA	NA	NA	NA	NA	NA	NA	NA	NA	NA	NA	NA	NA	NA	NA	NA	6.2 (0.02381)	NA	NA	NA	NA	NA	NA	NA	NA	NA	NA	NA	NA	NA
RecQ family helicase-topoisomerase III complex	NA	NA	NA	NA	NA	NA	NA	NA	NA	NA	NA	NA	NA	NA	NA	NA	7.1 (0.038067)	NA	NA	NA	NA	NA	NA	NA	NA	NA	NA	NA	NA	NA	NA	NA	NA	NA	NA	NA	NA	NA	NA	NA	NA
Rix1 complex	NA	NA	NA	NA	NA	NA	NA	NA	NA	NA	NA	NA	NA	NA	18.2 (0.00349)	NA	NA	NA	NA	NA	NA	NA	NA	NA	NA	NA	NA	NA	NA	NA	NA	NA	NA	NA	NA	NA	NA	NA	NA	NA	NA
S-methyltransferase activity	NA	NA	NA	NA	NA	NA	NA	NA	NA	6.9 (0.016937)	NA	NA	NA	NA	NA	NA	NA	NA	NA	NA	NA	NA	NA	NA	NA	NA	NA	NA	NA	NA	NA	NA	NA	NA	NA	NA	NA	NA	NA	NA	NA
Sm-like protein family complex	NA	NA	NA	NA	NA	NA	2.6 (0.018846)	NA	NA	NA	NA	NA	NA	NA	NA	NA	NA	NA	NA	NA	NA	NA	NA	NA	NA	NA	NA	NA	NA	NA	NA	NA	NA	NA	NA	NA	NA	NA	NA	NA	NA
Tec1p-Ste12p-Dig1p complex	NA	NA	NA	NA	NA	NA	NA	NA	NA	NA	NA	NA	5.9 (0.030956)	NA	NA	NA	NA	NA	NA	NA	NA	NA	NA	NA	NA	NA	NA	NA	NA	NA	NA	NA	NA	NA	NA	NA	NA	NA	NA	NA	NA
U4 snRNP	NA	NA	NA	NA	NA	NA	NA	NA	NA	NA	NA	NA	NA	NA	4 (0.027645)	NA	NA	NA	NA	NA	NA	NA	NA	NA	NA	NA	NA	NA	NA	NA	NA	NA	NA	NA	NA	NA	NA	NA	NA	NA	NA
UBR1-RAD6 ubiquitin ligase complex	NA	NA	NA	NA	NA	NA	NA	NA	NA	NA	NA	NA	NA	NA	NA	NA	NA	NA	NA	NA	NA	NA	NA	NA	NA	NA	NA	6.2 (0.015474)	NA	NA	NA	NA	NA	NA	NA	NA	NA	NA	NA	NA	NA
acetate ester metabolic process	NA	NA	NA	NA	NA	NA	NA	NA	NA	NA	NA	NA	NA	NA	NA	NA	NA	NA	NA	NA	NA	NA	NA	NA	NA	NA	NA	NA	NA	8.3 (0.018329)	NA	NA	NA	NA	NA	NA	NA	NA	NA	NA	NA
acid phosphatase activity	NA	6.7 (0.042254)	NA	NA	NA	NA	NA	NA	NA	NA	NA	7.7 (0.014141)	NA	NA	NA	NA	3.4 (0.042254)	12.5 (0.042254)	NA	NA	NA	NA	NA	NA	NA	2.8 (0.042254)	NA	NA	NA	2.7 (0.00865)	NA	NA	NA	NA	25 (0.042254)	NA	NA	NA	NA	NA	NA
acireductone synthase activity	NA	NA	NA	NA	NA	NA	NA	NA	NA	NA	NA	NA	NA	NA	NA	NA	NA	NA	NA	NA	NA	NA	NA	NA	NA	NA	NA	NA	NA	NA	NA	NA	NA	NA	NA	NA	NA	33.3 (0.014085)	NA	NA	NA
acyl binding	NA	NA	NA	50 (0.009834)	NA	50 (0.005086)	NA	NA	NA	NA	NA	NA	NA	NA	NA	NA	NA	NA	NA	NA	NA	NA	NA	NA	NA	NA	NA	NA	NA	NA	NA	NA	NA	NA	NA	NA	NA	NA	NA	NA	NA
acyl-CoA ceramide synthase complex	NA	NA	NA	NA	NA	NA	NA	6.2 (0.007429)	NA	NA	NA	NA	NA	50 (0.007429)	NA	NA	NA	NA	NA	NA	NA	NA	NA	NA	NA	NA	NA	NA	NA	2.7 (0.014822)	NA	NA	NA	NA	NA	NA	NA	NA	NA	NA	NA
acylglycerol O-acyltransferase activity	NA	NA	NA	NA	NA	NA	NA	NA	NA	NA	NA	NA	NA	NA	NA	NA	NA	NA	NA	NA	NA	NA	NA	NA	NA	NA	NA	4.9 (0.036232)	NA	NA	NA	NA	NA	NA	NA	NA	NA	NA	8.3 (0.036232)	NA	NA
adaptation of signaling pathway	NA	NA	NA	NA	NA	NA	NA	NA	NA	NA	NA	NA	NA	NA	NA	NA	NA	NA	NA	NA	NA	NA	NA	NA	NA	NA	2.6 (0.012857)	NA	NA	NA	NA	NA	NA	NA	NA	NA	NA	NA	NA	NA	NA
adenine metabolic process	NA	NA	NA	NA	NA	NA	NA	NA	NA	NA	NA	NA	NA	NA	NA	NA	NA	NA	NA	NA	NA	NA	NA	NA	NA	NA	NA	9.1 (0.004128)	NA	NA	NA	NA	NA	NA	NA	NA	NA	NA	NA	NA	NA
alcohol binding	NA	NA	NA	11.1 (0.02857)	12.5 (0.034204)	11.1 (0.02857)	NA	NA	NA	NA	NA	NA	NA	NA	NA	NA	NA	NA	NA	NA	NA	NA	NA	NA	NA	NA	NA	NA	NA	NA	NA	NA	NA	NA	NA	NA	NA	NA	NA	NA	NA
alkali metal ion binding	NA	NA	NA	NA	NA	NA	NA	NA	NA	NA	NA	NA	NA	NA	NA	NA	NA	NA	NA	NA	NA	NA	NA	NA	NA	NA	NA	NA	NA	NA	NA	NA	NA	NA	NA	NA	NA	16.7 (0.030177)	NA	NA	NA
alkanesulfonate metabolic process	NA	NA	NA	NA	NA	NA	NA	NA	25 (0.003305)	25 (0.018029)	NA	NA	NA	NA	NA	NA	NA	NA	NA	NA	NA	NA	NA	NA	NA	NA	NA	NA	NA	NA	NA	NA	NA	NA	NA	NA	NA	33.3 (0.011719)	NA	NA	NA
allantoin metabolic process	NA	NA	NA	NA	NA	NA	NA	NA	4.5 (0.023715)	NA	NA	NA	2.9 (0.04696)	NA	NA	NA	NA	NA	NA	11.8 (0.001397)	NA	NA	NA	NA	NA	NA	NA	NA	NA	NA	NA	NA	NA	NA	NA	NA	NA	5.3 (0.023715)	NA	NA	NA
alpha-1,4-mannosyltransferase activity	NA	NA	NA	NA	NA	NA	NA	NA	NA	NA	NA	NA	NA	NA	NA	NA	NA	NA	NA	NA	NA	NA	NA	NA	NA	NA	NA	12.5 (0.025)	NA	NA	NA	NA	NA	NA	NA	NA	NA	NA	NA	NA	NA
amidase activity	NA	NA	NA	NA	NA	NA	NA	NA	NA	NA	NA	NA	NA	NA	NA	NA	NA	NA	NA	33.3 (0.033333)	NA	NA	NA	NA	NA	NA	NA	NA	NA	NA	NA	NA	NA	NA	NA	NA	NA	NA	NA	NA	NA
amide binding	NA	NA	NA	NA	NA	NA	4.2 (0.028783)	NA	NA	NA	NA	NA	NA	NA	NA	NA	NA	NA	NA	NA	NA	NA	NA	NA	NA	NA	NA	NA	NA	NA	NA	NA	NA	NA	NA	NA	NA	NA	NA	NA	NA
amide transport	NA	NA	NA	3.4 (0.037785)	3.8 (0.029063)	3.6 (0.029063)	NA	NA	NA	NA	NA	NA	NA	10 (0.029063)	NA	NA	NA	4.8 (0.001572)	NA	NA	NA	NA	NA	NA	NA	NA	NA	NA	3.2 (0.01019)	NA	20 (0.040252)	NA	NA	NA	NA	NA	NA	NA	NA	NA	NA
amine metabolic process	NA	NA	NA	NA	NA	NA	NA	NA	NA	2.3 (0.019813)	NA	2.6 (0.018356)	NA	NA	NA	NA	NA	NA	NA	NA	NA	NA	NA	NA	NA	NA	2.1 (0.04984)	NA	NA	NA	NA	NA	NA	NA	NA	NA	NA	NA	NA	NA	NA
amino acid kinase activity	NA	NA	NA	NA	NA	NA	NA	NA	NA	NA	NA	NA	NA	NA	NA	NA	NA	NA	NA	NA	NA	NA	NA	NA	NA	NA	NA	NA	NA	NA	NA	NA	NA	NA	NA	NA	NA	NA	4.2 (0.034362)	NA	NA
anaerobic respiration	NA	NA	NA	NA	NA	NA	NA	10 (0.041022)	NA	NA	NA	NA	NA	100 (0.020619)	NA	NA	NA	NA	NA	NA	NA	NA	NA	NA	NA	NA	NA	NA	NA	4 (0.020619)	NA	NA	NA	NA	NA	NA	NA	NA	NA	NA	NA
anchored component of membrane	NA	NA	NA	4.4 (0.043484)	4.8 (0.026612)	3.4 (0.020224)	4.8 (0.039349)	NA	NA	NA	NA	NA	NA	NA	NA	NA	2.5 (0.001127)	NA	NA	NA	NA	NA	NA	7.3 (0.020224)	NA	NA	3.8 (0.005452)	3.4 (1e-06)	NA	NA	NA	NA	NA	NA	NA	NA	NA	NA	NA	NA	NA
antimonite transport	NA	NA	NA	NA	NA	NA	NA	NA	NA	NA	NA	NA	NA	NA	NA	NA	NA	NA	NA	NA	NA	NA	NA	100 (0.034483)	NA	NA	NA	NA	NA	NA	NA	NA	NA	NA	NA	NA	NA	NA	NA	NA	NA
antisense RNA metabolic process	NA	NA	NA	NA	NA	NA	NA	NA	NA	NA	NA	NA	NA	NA	NA	NA	NA	NA	NA	NA	NA	NA	14.3 (0.039042)	NA	NA	NA	NA	NA	3.8 (0.039042)	NA	NA	NA	NA	NA	14.3 (0.019694)	NA	NA	NA	NA	NA	NA
antisense transcription	2.1 (0)	2.3 (0)	2.2 (0)	NA	NA	NA	NA	2.2 (0)	2.1 (0)	NA	NA	NA	NA	NA	NA	2.3 (0)	NA	NA	NA	NA	2.1 (0)	NA	NA	NA	NA	2.2 (0)	NA	NA	NA	2.1 (0)	NA	NA	NA	2.2 (0)	NA	NA	2.2 (0)	NA	NA	2.3 (0)	2.2 (0)
argininosuccinate synthase activity	NA	NA	NA	NA	NA	NA	NA	NA	25 (0.027027)	NA	NA	NA	NA	NA	NA	NA	NA	NA	NA	NA	NA	NA	NA	NA	NA	NA	NA	NA	NA	NA	NA	NA	NA	NA	NA	NA	NA	NA	NA	NA	14.3 (0.027027)
aromatic amino acid family metabolic process	NA	NA	NA	NA	NA	NA	NA	NA	NA	3.2 (0.043706)	NA	NA	NA	NA	NA	NA	NA	NA	NA	NA	NA	NA	NA	NA	NA	NA	NA	NA	NA	NA	NA	NA	NA	NA	NA	NA	NA	NA	NA	NA	NA
arsenate ion transmembrane transport	NA	NA	NA	NA	NA	NA	NA	NA	NA	NA	NA	NA	NA	NA	NA	NA	NA	NA	NA	NA	NA	NA	NA	NA	NA	NA	NA	NA	NA	NA	NA	NA	NA	NA	NA	NA	NA	NA	NA	NA	15.4 (0.00224)
arsenate reductase activity	33.3 (0.006211)	NA	NA	NA	NA	NA	NA	NA	NA	25 (0.043478)	NA	NA	NA	NA	NA	NA	NA	NA	NA	33.3 (0.021739)	9.1 (0.031056)	NA	NA	100 (0.006211)	NA	NA	NA	NA	33.3 (0.012422)	NA	NA	25 (0.034161)	100 (0.006211)	NA	NA	NA	NA	NA	NA	NA	NA
aspartate-semialdehyde dehydrogenase activity	NA	NA	NA	NA	NA	NA	NA	NA	NA	NA	NA	NA	NA	100 (0.02439)	NA	NA	NA	NA	NA	NA	NA	NA	NA	NA	NA	NA	NA	NA	NA	NA	NA	NA	NA	NA	NA	NA	NA	NA	NA	NA	NA
assembly of large subunit precursor of preribosome	NA	NA	NA	NA	NA	NA	NA	NA	NA	NA	NA	NA	NA	NA	NA	NA	NA	NA	NA	NA	NA	NA	NA	NA	NA	NA	NA	NA	NA	NA	NA	NA	NA	NA	NA	NA	NA	NA	5.3 (0.006204)	NA	NA
benzene-containing compound metabolic process	NA	NA	NA	NA	NA	NA	NA	NA	NA	5.1 (0.014931)	NA	NA	NA	NA	NA	NA	NA	6.7 (0.030862)	NA	6.2 (0.009076)	NA	NA	NA	11.1 (0.036929)	NA	NA	NA	NA	NA	NA	NA	NA	NA	NA	NA	NA	NA	NA	NA	NA	NA
benzil reductase [(S)-benzoin-forming] activity	NA	NA	NA	NA	NA	NA	NA	NA	NA	NA	NA	NA	NA	NA	NA	NA	NA	NA	NA	33.3 (0.040541)	NA	NA	NA	NA	NA	NA	NA	NA	NA	NA	NA	NA	NA	NA	NA	NA	NA	33.3 (0.027027)	NA	NA	NA
biological adhesion	NA	NA	NA	NA	NA	NA	NA	NA	NA	NA	NA	NA	NA	NA	NA	NA	2.2 (0.032222)	NA	NA	NA	NA	NA	NA	NA	NA	NA	3 (0.038608)	NA	NA	NA	NA	NA	NA	NA	NA	NA	NA	NA	NA	NA	NA
biological process involved in intraspecies interaction between organisms	NA	NA	NA	NA	NA	NA	NA	NA	NA	NA	NA	NA	NA	NA	NA	NA	2.5 (0.026125)	NA	NA	NA	NA	NA	NA	NA	NA	NA	3.3 (0.028729)	2.2 (0.012989)	NA	NA	NA	NA	NA	NA	NA	NA	NA	NA	NA	NA	NA
box C/D RNA metabolic process	NA	NA	NA	NA	NA	NA	NA	NA	NA	NA	NA	NA	NA	NA	5.7 (0.016471)	NA	NA	NA	NA	NA	NA	NA	NA	NA	NA	NA	NA	NA	NA	NA	NA	NA	NA	NA	NA	NA	NA	NA	NA	NA	NA
branched-chain amino acid metabolic process	NA	NA	NA	NA	NA	NA	NA	NA	NA	NA	NA	NA	2.1 (0.021)	NA	NA	NA	NA	NA	NA	NA	NA	NA	NA	NA	NA	NA	5.3 (0.000626)	NA	NA	NA	NA	NA	NA	NA	NA	NA	NA	NA	NA	NA	2.4 (0.00372)
branched-chain-amino-acid transaminase activity	NA	NA	NA	NA	NA	NA	NA	NA	NA	NA	NA	NA	NA	NA	NA	NA	NA	NA	NA	NA	NA	NA	NA	NA	NA	NA	9.4 (0.012987)	NA	NA	4 (0.045796)	NA	NA	NA	NA	NA	NA	NA	NA	NA	NA	7.7 (0.012987)
butanoyltransferase activity	NA	NA	NA	NA	NA	NA	NA	NA	NA	NA	NA	25 (0.038095)	NA	NA	NA	NA	NA	NA	NA	NA	NA	NA	NA	NA	NA	NA	NA	NA	NA	NA	NA	NA	NA	NA	NA	NA	NA	NA	NA	NA	NA
carbohydrate derivative metabolic process	NA	NA	NA	NA	NA	NA	2.9 (2.9e-05)	NA	NA	NA	NA	NA	NA	NA	NA	NA	NA	NA	NA	NA	NA	NA	NA	NA	NA	NA	NA	NA	NA	NA	NA	NA	NA	NA	NA	NA	NA	NA	NA	NA	NA
carbohydrate derivative transport	NA	NA	NA	NA	NA	NA	NA	NA	NA	3.2 (0.004096)	NA	NA	NA	NA	NA	NA	NA	NA	NA	NA	NA	NA	NA	NA	NA	NA	NA	NA	NA	NA	NA	NA	NA	NA	NA	NA	NA	NA	NA	NA	NA
carbohydrate transport	3.2 (0.004196)	NA	NA	NA	NA	NA	NA	NA	NA	NA	NA	NA	NA	NA	NA	NA	NA	NA	NA	NA	NA	NA	NA	NA	NA	NA	NA	NA	NA	NA	NA	2.2 (0.007326)	NA	NA	NA	NA	NA	NA	NA	NA	NA
carbon-oxygen lyase activity	NA	NA	NA	NA	NA	NA	NA	NA	NA	NA	NA	NA	NA	NA	NA	NA	NA	NA	NA	NA	NA	NA	NA	NA	NA	NA	3.9 (0.000463)	NA	NA	NA	NA	NA	NA	NA	NA	NA	NA	NA	NA	NA	NA
carbonyl reductase (NADPH) activity	NA	NA	NA	NA	NA	NA	NA	NA	NA	NA	NA	15.4 (0.010798)	NA	NA	NA	NA	NA	NA	NA	NA	NA	NA	50 (0.040541)	NA	NA	NA	NA	NA	NA	NA	NA	NA	NA	NA	NA	NA	NA	NA	NA	NA	NA
carboxylic acid transport	NA	NA	NA	NA	NA	NA	NA	NA	NA	NA	NA	NA	NA	NA	NA	NA	NA	NA	NA	NA	NA	NA	NA	NA	NA	NA	NA	NA	NA	NA	NA	NA	NA	NA	NA	NA	NA	NA	2.2 (0.04366)	NA	NA
carboxymethylenebutenolidase activity	NA	NA	NA	NA	NA	NA	NA	NA	NA	NA	NA	NA	NA	NA	NA	NA	NA	NA	NA	NA	9.1 (0.016949)	NA	NA	NA	NA	NA	NA	NA	33.3 (0.016949)	NA	NA	NA	NA	NA	NA	NA	NA	NA	NA	NA	NA
cargo receptor ligand activity	NA	NA	NA	NA	NA	NA	NA	NA	NA	NA	NA	NA	NA	NA	NA	NA	NA	NA	NA	NA	NA	NA	NA	NA	NA	NA	NA	NA	NA	NA	NA	NA	NA	NA	NA	NA	NA	NA	20 (0.02272)	NA	NA
catalytic activity, acting on RNA	NA	NA	NA	NA	NA	NA	NA	NA	NA	NA	NA	NA	NA	NA	2.2 (0.000521)	NA	NA	NA	NA	NA	NA	NA	NA	NA	NA	NA	NA	NA	NA	NA	NA	NA	NA	NA	NA	NA	NA	NA	NA	NA	NA
cell adhesion molecule binding	8.3 (0.010939)	NA	NA	NA	NA	NA	NA	NA	6.7 (0.003656)	NA	NA	NA	8.7 (0.000772)	NA	NA	NA	10.5 (0.001681)	NA	NA	NA	NA	NA	NA	33.3 (0.014565)	NA	NA	9.5 (0.006063)	6.1 (0.004797)	8.3 (0.010939)	NA	NA	5.6 (0.018181)	NA	NA	NA	NA	NA	NA	NA	NA	NA
cell death	NA	NA	NA	NA	NA	NA	5.9 (0.020842)	NA	NA	NA	NA	NA	NA	NA	NA	NA	NA	NA	NA	NA	NA	NA	NA	NA	NA	NA	NA	NA	NA	NA	NA	NA	NA	NA	NA	NA	NA	NA	NA	NA	NA
cell projection membrane	NA	NA	NA	NA	NA	NA	NA	NA	NA	NA	NA	NA	NA	NA	NA	NA	NA	NA	NA	NA	4.8 (0.048381)	NA	NA	NA	NA	NA	NA	NA	NA	NA	NA	NA	NA	NA	NA	NA	NA	NA	NA	NA	NA
cell surface	NA	NA	NA	NA	NA	NA	NA	NA	NA	NA	NA	NA	NA	NA	NA	NA	NA	NA	NA	NA	NA	NA	NA	NA	NA	NA	NA	3.3 (0.000783)	NA	NA	NA	NA	NA	NA	NA	NA	NA	NA	NA	2.9 (0.018518)	NA
cell wall organization or biogenesis	NA	NA	NA	NA	NA	NA	3.1 (0.001314)	NA	NA	NA	NA	NA	NA	NA	NA	NA	NA	NA	NA	NA	NA	NA	NA	NA	NA	NA	NA	NA	NA	NA	NA	NA	NA	NA	4 (0.00077)	NA	NA	NA	NA	NA	NA
cellular amide catabolic process	NA	NA	NA	NA	NA	NA	NA	NA	NA	NA	NA	NA	NA	NA	NA	NA	NA	NA	NA	7.7 (0.008989)	NA	NA	NA	NA	NA	NA	NA	NA	NA	NA	NA	NA	NA	NA	NA	NA	NA	NA	NA	NA	NA
cellular birth scar	NA	NA	NA	NA	NA	NA	NA	NA	NA	NA	NA	NA	NA	NA	NA	NA	NA	NA	NA	NA	NA	NA	NA	NA	NA	NA	NA	NA	NA	NA	NA	NA	33.3 (0.046238)	11.1 (0.046238)	NA	50 (0.046238)	NA	16.7 (0.023256)	NA	NA	NA
cellular component maintenance	NA	NA	NA	NA	NA	NA	NA	NA	NA	NA	NA	NA	NA	NA	NA	NA	NA	NA	NA	NA	NA	NA	NA	NA	NA	NA	NA	NA	NA	2.7 (0.036106)	NA	NA	NA	NA	NA	NA	NA	NA	NA	NA	NA
cellular component morphogenesis	NA	NA	NA	NA	NA	NA	NA	NA	NA	NA	NA	NA	NA	NA	NA	NA	NA	NA	NA	NA	NA	NA	NA	NA	NA	NA	NA	NA	NA	NA	NA	NA	NA	NA	NA	NA	NA	3.6 (0.00568)	NA	NA	NA
cellular metabolic compound salvage	NA	NA	NA	3.6 (0.022491)	NA	NA	NA	NA	NA	NA	NA	NA	NA	NA	NA	NA	NA	NA	NA	NA	NA	NA	NA	NA	NA	NA	NA	NA	NA	NA	NA	NA	NA	NA	NA	NA	NA	NA	NA	NA	NA
cellular response to nitrogen levels	NA	NA	NA	NA	NA	NA	NA	NA	NA	NA	NA	NA	NA	NA	NA	NA	NA	NA	NA	NA	NA	NA	NA	NA	NA	NA	NA	NA	NA	NA	NA	NA	NA	NA	NA	NA	NA	NA	2.6 (0.020017)	NA	NA
chitin binding	NA	NA	NA	20 (0.016438)	20 (0.016438)	NA	NA	NA	NA	NA	NA	NA	NA	NA	NA	NA	NA	NA	NA	NA	NA	NA	NA	NA	NA	NA	NA	NA	NA	NA	NA	NA	NA	NA	NA	NA	NA	NA	NA	NA	NA
chromosome segregation	NA	NA	NA	NA	NA	NA	NA	NA	NA	NA	NA	NA	NA	NA	NA	NA	NA	NA	NA	NA	NA	4.4 (0.045175)	NA	NA	NA	NA	NA	NA	NA	NA	NA	NA	NA	NA	NA	NA	NA	NA	NA	NA	NA
chromosome, centromeric core domain	NA	NA	NA	NA	NA	NA	NA	NA	NA	NA	NA	NA	NA	NA	NA	NA	NA	NA	NA	NA	NA	NA	NA	NA	NA	NA	9.5 (0.001532)	6.1 (0.001532)	NA	NA	NA	NA	NA	NA	NA	NA	NA	NA	NA	NA	NA
cupric reductase activity	NA	NA	NA	NA	NA	NA	NA	NA	NA	NA	NA	NA	NA	NA	NA	NA	NA	NA	NA	NA	NA	NA	NA	NA	NA	NA	18.2 (0.035714)	12.5 (0.035714)	NA	NA	NA	NA	NA	NA	NA	NA	NA	NA	NA	NA	NA
cyclin binding	NA	NA	NA	NA	NA	NA	NA	NA	NA	NA	NA	NA	NA	NA	NA	NA	NA	NA	NA	NA	NA	NA	NA	NA	25 (0.042962)	NA	NA	NA	NA	NA	NA	NA	NA	NA	NA	NA	NA	NA	NA	NA	NA
cytochrome complex	NA	NA	NA	NA	NA	NA	NA	NA	NA	NA	NA	NA	NA	NA	NA	NA	NA	NA	NA	NA	NA	NA	NA	NA	NA	NA	4 (0.001235)	NA	NA	NA	NA	NA	NA	NA	NA	NA	NA	NA	NA	NA	NA
cytochrome complex assembly	NA	NA	NA	NA	NA	NA	NA	NA	NA	NA	NA	NA	NA	NA	NA	NA	NA	NA	NA	NA	NA	NA	NA	NA	NA	NA	NA	NA	NA	NA	NA	NA	NA	NA	NA	NA	NA	2.4 (0.026166)	NA	NA	NA
cytoophidium	NA	NA	NA	NA	NA	NA	NA	NA	NA	NA	NA	NA	NA	NA	NA	NA	NA	NA	NA	NA	9.1 (0.019275)	NA	NA	NA	NA	NA	NA	12.5 (0.029637)	NA	8.3 (0.020933)	NA	NA	NA	NA	NA	NA	NA	NA	NA	NA	NA
cytosolic tRNA wobble base thiouridylase complex	NA	NA	NA	NA	NA	NA	NA	NA	NA	NA	NA	NA	NA	NA	NA	NA	NA	NA	NA	NA	9.1 (0.006623)	NA	NA	NA	NA	NA	NA	NA	NA	NA	NA	NA	NA	NA	NA	NA	NA	NA	NA	NA	NA
deaminase activity	NA	NA	NA	NA	NA	NA	NA	NA	NA	NA	NA	3.8 (0.038125)	NA	NA	NA	NA	NA	NA	NA	NA	NA	NA	NA	NA	NA	NA	3.2 (0.031084)	NA	NA	NA	NA	NA	NA	NA	NA	NA	NA	NA	NA	NA	NA
demethylation	NA	NA	NA	NA	NA	NA	NA	2.4 (0.034273)	NA	NA	NA	NA	NA	NA	NA	NA	NA	NA	NA	NA	NA	NA	NA	NA	NA	NA	NA	NA	NA	NA	100 (0.00463)	NA	NA	NA	NA	NA	NA	NA	NA	NA	NA
deoxyribonucleoside metabolic process	NA	NA	NA	NA	NA	NA	NA	NA	NA	NA	NA	NA	NA	NA	25 (0.033333)	NA	NA	NA	NA	NA	NA	NA	NA	NA	NA	NA	NA	NA	NA	NA	NA	NA	NA	NA	NA	NA	NA	NA	NA	NA	NA
developmental process	NA	NA	NA	NA	NA	NA	2.3 (0.02055)	NA	NA	NA	NA	NA	NA	NA	NA	NA	NA	NA	NA	NA	NA	NA	NA	NA	NA	NA	NA	NA	NA	NA	NA	NA	NA	NA	4.5 (0.000911)	NA	NA	NA	NA	NA	NA
diaminopimelate metabolic process	NA	NA	NA	NA	NA	NA	NA	NA	NA	NA	NA	NA	NA	NA	NA	NA	NA	NA	NA	NA	NA	NA	NA	NA	NA	NA	NA	NA	NA	8 (0.017857)	NA	NA	NA	NA	NA	NA	NA	NA	NA	NA	NA
dicarboxylic acid metabolic process	NA	NA	NA	NA	NA	NA	NA	NA	NA	NA	NA	NA	NA	NA	NA	NA	NA	3.1 (0.049818)	NA	NA	NA	NA	NA	NA	NA	NA	NA	NA	NA	NA	NA	NA	NA	NA	NA	NA	NA	NA	NA	NA	NA
dicarboxylic acid transport	7 (0.040109)	NA	NA	NA	NA	NA	NA	NA	NA	NA	NA	5 (0.040109)	NA	NA	NA	NA	NA	NA	NA	NA	NA	NA	NA	NA	NA	NA	NA	NA	NA	2.3 (0.002359)	NA	NA	NA	NA	NA	NA	NA	NA	NA	NA	3.3 (0.011797)
dihydroxy-acid dehydratase activity	NA	NA	NA	NA	NA	NA	NA	NA	NA	NA	NA	NA	NA	NA	NA	NA	NA	NA	NA	NA	NA	NA	NA	NA	NA	NA	NA	NA	NA	4 (0.014845)	NA	NA	NA	NA	NA	NA	NA	NA	NA	NA	7.7 (0.007782)
dioxygenase activity	NA	NA	NA	NA	NA	NA	NA	NA	NA	6.4 (0.01452)	NA	NA	NA	NA	NA	NA	NA	NA	NA	NA	NA	NA	NA	NA	NA	NA	NA	NA	NA	NA	50 (0.040373)	NA	NA	NA	NA	NA	NA	NA	NA	NA	NA
diphosphoinositol-polyphosphate diphosphatase activity	NA	NA	NA	NA	NA	NA	NA	NA	NA	NA	NA	11.1 (0.028055)	NA	NA	NA	NA	NA	NA	NA	NA	NA	NA	NA	NA	NA	NA	NA	NA	NA	NA	NA	NA	NA	NA	NA	NA	NA	NA	NA	NA	NA
divalent inorganic cation homeostasis	NA	NA	NA	NA	NA	NA	NA	NA	NA	NA	NA	2.2 (0.010846)	NA	NA	NA	NA	NA	NA	NA	NA	NA	NA	NA	NA	NA	NA	NA	NA	NA	NA	NA	NA	NA	NA	NA	NA	NA	NA	NA	NA	NA
dolichyl-phosphate beta-D-mannosyltransferase activity	NA	NA	NA	NA	NA	NA	NA	NA	NA	NA	NA	NA	NA	NA	25 (0.025)	NA	NA	NA	NA	NA	NA	NA	NA	NA	NA	NA	NA	NA	NA	NA	NA	NA	NA	NA	NA	NA	NA	NA	NA	NA	NA
efflux transmembrane transporter activity	NA	NA	NA	NA	NA	NA	NA	NA	NA	NA	NA	NA	NA	NA	NA	NA	NA	NA	NA	NA	NA	NA	NA	NA	NA	NA	NA	NA	NA	NA	NA	NA	NA	NA	33.3 (0.048698)	NA	NA	NA	NA	NA	NA
electron transport chain	NA	NA	NA	NA	NA	NA	NA	NA	NA	NA	NA	2.3 (0.03678)	NA	NA	NA	NA	NA	NA	NA	NA	NA	NA	NA	NA	NA	NA	3.8 (0.016637)	NA	NA	NA	NA	NA	NA	NA	NA	NA	NA	NA	NA	NA	NA
endomembrane system organization	NA	NA	NA	NA	NA	NA	NA	NA	NA	NA	NA	NA	NA	NA	NA	NA	NA	NA	NA	NA	NA	NA	NA	2.2 (0.029901)	NA	NA	NA	NA	NA	NA	NA	NA	NA	NA	NA	NA	NA	NA	NA	NA	NA
endopolyphosphatase activity	NA	NA	NA	NA	NA	NA	NA	NA	NA	NA	NA	7.7 (0.041827)	NA	NA	NA	NA	NA	NA	NA	NA	NA	NA	NA	NA	NA	NA	NA	NA	NA	NA	NA	NA	NA	NA	NA	NA	NA	NA	NA	NA	NA
endoribonuclease complex	NA	NA	NA	NA	NA	NA	NA	NA	NA	NA	NA	NA	NA	NA	4.7 (0.031829)	NA	NA	4.5 (0.049483)	NA	NA	NA	NA	NA	NA	NA	NA	NA	NA	NA	NA	NA	NA	NA	NA	NA	NA	NA	NA	NA	NA	NA
ether metabolic process	NA	NA	12.5 (0.005634)	NA	NA	NA	NA	NA	NA	NA	NA	NA	NA	NA	NA	NA	NA	NA	NA	NA	NA	NA	NA	NA	NA	NA	NA	NA	NA	NA	NA	NA	NA	NA	NA	NA	NA	NA	NA	NA	NA
exoribonuclease complex	NA	NA	NA	NA	NA	NA	NA	NA	NA	NA	NA	NA	NA	NA	NA	NA	NA	NA	NA	NA	NA	NA	NA	NA	NA	NA	NA	NA	NA	NA	NA	NA	NA	NA	NA	NA	NA	NA	3.7 (0.023738)	NA	NA
external encapsulating structure	NA	NA	NA	4.4 (0.000772)	4.2 (0.002361)	NA	4.1 (0.028569)	NA	NA	NA	NA	2.1 (0.018253)	NA	NA	NA	NA	2.6 (1e-06)	NA	NA	NA	NA	NA	NA	5.6 (0.008913)	NA	NA	3.5 (1.3e-05)	3.2 (0)	NA	NA	NA	NA	NA	NA	NA	NA	NA	NA	NA	NA	NA
external encapsulating structure organization	NA	NA	NA	NA	NA	NA	2.5 (0.009201)	NA	NA	NA	NA	NA	NA	NA	NA	NA	NA	NA	NA	NA	NA	NA	NA	NA	NA	NA	NA	NA	NA	NA	NA	NA	NA	NA	5 (9.5e-05)	NA	NA	NA	NA	NA	NA
extracellular region	NA	NA	NA	4.3 (7.7e-05)	4 (0.000162)	2.6 (0.003064)	NA	NA	NA	2.5 (0.002345)	NA	2.1 (0.008804)	NA	5.4 (0.022871)	NA	NA	2.1 (6e-06)	NA	NA	NA	NA	NA	NA	6.8 (9.7e-05)	NA	NA	3.8 (0)	3.3 (0)	NA	NA	NA	NA	NA	NA	NA	NA	NA	NA	NA	NA	NA
fatty acid derivative binding	NA	NA	NA	NA	NA	NA	NA	NA	NA	NA	NA	NA	NA	NA	25 (0.028484)	NA	NA	NA	NA	NA	NA	NA	NA	NA	NA	NA	NA	NA	NA	NA	NA	NA	NA	NA	NA	NA	NA	NA	NA	NA	NA
fatty acid derivative metabolic process	NA	NA	NA	NA	NA	NA	NA	NA	NA	NA	NA	NA	NA	NA	NA	NA	NA	NA	NA	NA	3.1 (0.044411)	NA	NA	NA	NA	NA	NA	NA	NA	NA	NA	NA	NA	NA	NA	NA	NA	NA	NA	NA	NA
fatty acid elongase activity	NA	NA	NA	NA	NA	NA	NA	NA	NA	NA	NA	NA	NA	NA	NA	NA	NA	NA	NA	NA	NA	NA	NA	NA	NA	NA	NA	12.5 (0.047619)	NA	NA	NA	NA	NA	NA	NA	NA	NA	NA	NA	NA	NA
fatty acid synthase activity	NA	NA	NA	NA	NA	NA	NA	NA	NA	NA	NA	NA	NA	NA	NA	NA	NA	NA	NA	NA	2.7 (0.003846)	NA	NA	NA	NA	NA	NA	3.5 (0.021605)	NA	NA	NA	NA	NA	NA	NA	NA	NA	NA	NA	NA	NA
fermentation	NA	NA	NA	NA	NA	NA	NA	NA	NA	4.3 (0.040885)	NA	NA	NA	NA	NA	NA	NA	NA	NA	NA	NA	NA	NA	NA	NA	NA	NA	NA	NA	NA	NA	NA	NA	NA	NA	NA	NA	NA	NA	NA	NA
ferroxidase complex	NA	NA	NA	NA	NA	NA	NA	NA	NA	NA	NA	NA	NA	NA	NA	NA	NA	NA	NA	NA	NA	NA	NA	NA	NA	NA	NA	NA	NA	NA	NA	NA	NA	NA	NA	NA	NA	NA	NA	NA	7.7 (0.008097)
fructan metabolic process	NA	NA	NA	NA	NA	NA	NA	NA	NA	NA	NA	NA	NA	NA	NA	NA	NA	NA	NA	NA	NA	NA	100 (0.035088)	NA	NA	NA	NA	NA	NA	NA	NA	NA	NA	NA	NA	NA	NA	NA	NA	NA	NA
galacturonan metabolic process	NA	NA	NA	NA	NA	NA	NA	NA	NA	NA	NA	NA	NA	NA	NA	NA	NA	100 (0.015385)	NA	NA	NA	NA	NA	NA	NA	NA	NA	NA	NA	NA	NA	NA	NA	NA	NA	NA	NA	NA	NA	NA	NA
gamma-aminobutyric acid transport	NA	NA	NA	NA	NA	NA	NA	NA	NA	NA	NA	NA	NA	NA	NA	NA	NA	NA	NA	NA	NA	NA	NA	NA	NA	NA	NA	NA	33.3 (0.007389)	NA	NA	NA	NA	NA	NA	NA	NA	NA	NA	NA	NA
gene silencing by RNA	NA	NA	NA	5.7 (0.00464)	NA	NA	NA	NA	NA	4.4 (0.000292)	NA	4.9 (0.000238)	NA	NA	NA	NA	NA	NA	NA	NA	NA	NA	NA	NA	NA	NA	NA	NA	NA	NA	NA	NA	NA	NA	NA	NA	NA	NA	NA	NA	NA
generation of precursor metabolites and energy	NA	NA	NA	NA	NA	NA	2.5 (0.00866)	NA	NA	NA	NA	NA	NA	NA	NA	NA	NA	NA	NA	NA	NA	NA	NA	NA	NA	NA	NA	NA	NA	NA	NA	NA	NA	NA	2.8 (0.029021)	NA	NA	NA	NA	NA	NA
global genome nucleotide-excision repair	NA	NA	NA	NA	NA	NA	NA	NA	NA	NA	NA	NA	NA	NA	NA	NA	NA	NA	NA	NA	NA	NA	NA	NA	NA	NA	8.1 (0.000972)	3.5 (0.011475)	NA	NA	NA	NA	NA	NA	NA	NA	NA	NA	NA	NA	NA
glucanosyltransferase activity	NA	NA	NA	NA	8.3 (0.049485)	NA	NA	NA	NA	NA	NA	NA	NA	NA	NA	NA	NA	NA	NA	NA	NA	NA	NA	NA	NA	NA	NA	3.5 (0.018718)	NA	NA	NA	NA	NA	NA	NA	NA	NA	NA	NA	NA	NA
gluconokinase activity	NA	NA	NA	NA	NA	NA	NA	NA	NA	25 (0.020576)	NA	NA	NA	NA	NA	NA	NA	NA	NA	NA	NA	NA	NA	NA	NA	NA	NA	NA	NA	NA	NA	NA	NA	NA	100 (0.00823)	NA	NA	NA	NA	NA	NA
glucosamine 6-phosphate N-acetyltransferase activity	NA	NA	NA	NA	NA	NA	NA	NA	NA	NA	NA	NA	NA	NA	25 (0.02381)	NA	NA	NA	NA	NA	NA	NA	NA	NA	NA	NA	NA	NA	NA	NA	NA	NA	NA	NA	NA	NA	NA	NA	NA	NA	NA
glutamine-tRNA ligase activity	NA	NA	NA	NA	NA	NA	NA	NA	NA	NA	NA	NA	NA	NA	25 (0.028571)	NA	NA	NA	NA	NA	NA	NA	NA	NA	NA	NA	NA	NA	NA	NA	NA	NA	NA	NA	NA	NA	NA	NA	NA	NA	NA
glutaminyl-tRNA aminoacylation	NA	NA	NA	NA	NA	NA	NA	NA	NA	NA	NA	NA	NA	NA	25 (0.028571)	NA	NA	NA	NA	NA	NA	NA	NA	NA	NA	NA	NA	NA	NA	NA	NA	NA	NA	NA	NA	NA	NA	NA	NA	NA	NA
glycerol-3-phosphatase activity	NA	NA	NA	NA	NA	NA	NA	NA	NA	NA	NA	NA	NA	NA	25 (0.028169)	NA	NA	NA	NA	NA	NA	NA	NA	NA	NA	NA	NA	NA	NA	NA	NA	NA	NA	NA	NA	NA	NA	NA	NA	NA	NA
glycoside transport	NA	NA	NA	NA	NA	NA	NA	NA	14.3 (0.046512)	NA	NA	NA	NA	NA	NA	NA	NA	NA	NA	NA	NA	NA	NA	NA	NA	NA	NA	NA	NA	NA	NA	NA	NA	NA	NA	NA	NA	NA	NA	NA	NA
growing cell tip	NA	NA	NA	NA	NA	NA	NA	NA	NA	NA	NA	NA	NA	NA	NA	NA	5.3 (0.034783)	NA	NA	NA	NA	NA	NA	NA	NA	NA	NA	NA	NA	NA	NA	NA	NA	NA	NA	NA	NA	NA	NA	NA	NA
growth	NA	NA	NA	NA	NA	NA	2.4 (0.040205)	NA	NA	NA	NA	NA	NA	NA	NA	NA	NA	NA	NA	NA	NA	NA	NA	NA	16.7 (0.012081)	NA	NA	NA	NA	NA	NA	NA	NA	NA	NA	NA	NA	NA	NA	NA	NA
guanine nucleotide transport	NA	NA	NA	NA	NA	NA	NA	NA	NA	NA	NA	NA	NA	NA	NA	NA	NA	NA	NA	NA	NA	NA	NA	NA	NA	NA	20 (0.035714)	NA	NA	NA	NA	NA	NA	NA	NA	NA	NA	NA	NA	NA	NA
guanyl-nucleotide exchange factor complex	NA	NA	NA	NA	NA	NA	NA	NA	NA	NA	NA	NA	NA	NA	NA	NA	NA	NA	NA	NA	NA	NA	NA	NA	NA	NA	NA	NA	NA	NA	NA	NA	NA	NA	NA	NA	NA	2.9 (0.048665)	NA	NA	NA
histidinol dehydrogenase activity	NA	NA	NA	NA	NA	50 (0.027027)	NA	NA	NA	NA	NA	NA	NA	NA	NA	NA	NA	NA	NA	NA	NA	NA	NA	NA	NA	NA	NA	NA	NA	NA	NA	NA	NA	NA	NA	NA	NA	NA	NA	NA	NA
histone H2A acetylation	NA	NA	NA	NA	NA	NA	NA	NA	NA	NA	NA	NA	NA	NA	NA	NA	NA	NA	NA	NA	NA	NA	NA	NA	NA	NA	6.2 (0.046154)	NA	NA	2.7 (0.046154)	NA	NA	NA	NA	NA	NA	NA	NA	NA	NA	NA
histone H3-K9 modification	NA	NA	NA	NA	NA	NA	NA	NA	NA	NA	100 (0.027586)	NA	NA	NA	NA	NA	NA	NA	NA	NA	NA	NA	NA	NA	NA	NA	NA	NA	NA	NA	NA	NA	NA	NA	33.3 (0.027586)	NA	NA	NA	NA	NA	NA
holo-[acyl-carrier-protein] biosynthetic process	NA	NA	NA	NA	NA	NA	NA	NA	NA	NA	NA	NA	NA	NA	NA	NA	NA	NA	NA	NA	NA	NA	NA	NA	NA	NA	NA	NA	NA	NA	NA	NA	NA	NA	NA	NA	NA	NA	20 (0.039809)	NA	NA
hydrolase activity, acting on acid carbon-carbon bonds	NA	NA	NA	NA	NA	NA	NA	NA	NA	14.3 (0.03271)	NA	NA	NA	NA	NA	NA	NA	NA	NA	16.7 (0.027296)	NA	NA	NA	50 (0.005489)	NA	NA	NA	NA	NA	NA	NA	NA	NA	NA	NA	NA	NA	16.7 (0.029103)	NA	NA	NA
hydrolase activity, acting on carbon-nitrogen (but not peptide) bonds	NA	NA	NA	NA	NA	NA	4.1 (0.025005)	NA	NA	NA	NA	NA	NA	NA	NA	NA	NA	NA	NA	NA	NA	NA	NA	NA	NA	NA	NA	NA	NA	NA	NA	NA	NA	NA	NA	NA	NA	NA	NA	NA	NA
hydrolase activity, acting on glycosyl bonds	NA	NA	NA	NA	NA	NA	NA	NA	NA	NA	NA	NA	NA	NA	NA	NA	NA	NA	NA	NA	NA	NA	5 (0.011175)	NA	NA	NA	NA	NA	NA	NA	NA	NA	NA	NA	NA	NA	NA	NA	NA	NA	NA
hydroxymethyl-, formyl- and related transferase activity	NA	NA	NA	NA	NA	NA	NA	NA	NA	NA	NA	NA	NA	NA	NA	NA	NA	NA	NA	NA	NA	NA	NA	NA	NA	NA	NA	NA	NA	2.3 (0.003568)	NA	NA	NA	NA	NA	NA	NA	NA	NA	NA	NA
hydroxymethylpyrimidine kinase activity	NA	NA	NA	NA	NA	NA	NA	NA	NA	25 (0.020576)	NA	25 (0.024691)	NA	NA	NA	NA	NA	NA	NA	NA	NA	NA	NA	NA	NA	NA	20 (0.032922)	NA	NA	NA	NA	NA	NA	NA	NA	NA	NA	NA	NA	NA	NA
hyperosmotic response	NA	NA	NA	NA	NA	NA	NA	NA	NA	3.7 (0.044757)	NA	NA	NA	NA	NA	NA	NA	NA	NA	NA	NA	NA	NA	NA	NA	NA	NA	NA	NA	NA	NA	NA	NA	NA	NA	NA	NA	NA	NA	NA	NA
hypoxanthine metabolic process	NA	NA	NA	NA	NA	NA	NA	NA	NA	NA	NA	NA	NA	NA	NA	NA	NA	NA	NA	NA	NA	NA	NA	NA	NA	NA	NA	NA	NA	5.4 (0.017544)	NA	NA	NA	NA	NA	NA	NA	NA	NA	NA	NA
identical protein binding	NA	NA	NA	NA	NA	NA	NA	NA	NA	4.3 (0.026343)	NA	NA	NA	NA	NA	NA	NA	NA	NA	NA	NA	NA	NA	NA	NA	NA	NA	NA	NA	NA	NA	NA	NA	NA	NA	NA	NA	NA	NA	NA	NA
inclusion body assembly	NA	NA	NA	NA	NA	NA	33.3 (0.009901)	NA	NA	NA	NA	NA	NA	NA	NA	NA	NA	NA	NA	NA	NA	NA	NA	NA	NA	NA	NA	NA	NA	NA	NA	NA	NA	NA	NA	NA	NA	NA	NA	NA	NA
indole-containing compound metabolic process	NA	NA	NA	NA	NA	NA	NA	NA	NA	5.6 (0.002293)	NA	NA	2.3 (0.009071)	NA	NA	NA	NA	NA	NA	4.7 (0.009071)	NA	NA	NA	8.3 (0.038164)	NA	NA	NA	NA	NA	NA	NA	NA	NA	NA	NA	NA	NA	4.2 (0.00688)	NA	NA	NA
indoleacetamide hydrolase activity	NA	NA	NA	NA	NA	NA	NA	NA	NA	NA	NA	NA	NA	NA	NA	NA	NA	NA	NA	33.3 (0.033333)	NA	NA	NA	NA	NA	NA	NA	NA	NA	NA	NA	NA	NA	NA	NA	NA	NA	NA	NA	NA	NA
inorganic anion transport	NA	NA	NA	NA	NA	NA	NA	NA	NA	NA	NA	4 (0.015278)	NA	NA	NA	NA	NA	NA	NA	NA	NA	NA	NA	NA	NA	NA	3.3 (0.006855)	NA	NA	NA	NA	NA	NA	NA	NA	NA	NA	NA	NA	NA	NA
inositol diphosphate pentakisphosphate diphosphatase activity	NA	NA	NA	NA	NA	NA	NA	NA	NA	NA	NA	7.7 (0.041827)	NA	NA	NA	NA	NA	NA	NA	NA	NA	NA	NA	NA	NA	NA	NA	NA	NA	NA	NA	NA	NA	NA	NA	NA	NA	NA	NA	NA	NA
inositol diphosphate tetrakisphosphate diphosphatase activity	NA	NA	NA	NA	NA	NA	NA	NA	NA	NA	NA	7.7 (0.041827)	NA	NA	NA	NA	NA	NA	NA	NA	NA	NA	NA	NA	NA	NA	NA	NA	NA	NA	NA	NA	NA	NA	NA	NA	NA	NA	NA	NA	NA
inositol lipid-mediated signaling	NA	NA	NA	NA	NA	NA	NA	NA	NA	NA	NA	NA	NA	NA	NA	NA	NA	NA	NA	NA	NA	NA	NA	NA	NA	NA	NA	NA	NA	NA	NA	2.3 (0.033898)	NA	NA	NA	NA	NA	NA	NA	NA	NA
inositol phosphoceramide synthase activity	NA	NA	NA	20 (0.041667)	20 (0.041667)	NA	NA	NA	NA	NA	NA	NA	NA	NA	NA	NA	NA	NA	NA	NA	NA	NA	NA	NA	NA	NA	NA	NA	NA	NA	NA	NA	NA	NA	NA	NA	8.3 (0.041667)	NA	NA	NA	NA
intermediate filament cytoskeleton	NA	NA	NA	NA	NA	NA	NA	NA	NA	NA	NA	NA	NA	NA	25 (0.017094)	NA	NA	NA	NA	NA	NA	NA	NA	NA	NA	NA	NA	NA	NA	NA	NA	NA	NA	NA	NA	NA	NA	NA	NA	NA	NA
intermediate filament-based process	NA	NA	NA	NA	NA	NA	NA	NA	NA	NA	NA	NA	NA	NA	25 (0.030543)	NA	NA	NA	NA	NA	NA	NA	NA	NA	NA	NA	NA	NA	NA	NA	NA	NA	NA	NA	NA	NA	NA	NA	NA	NA	NA
intracellular immature spore	NA	NA	NA	NA	NA	NA	NA	NA	NA	2.4 (0.016384)	NA	NA	NA	NA	NA	NA	NA	2.7 (0.013046)	NA	3 (0.001877)	NA	NA	NA	NA	NA	NA	NA	NA	NA	NA	NA	NA	NA	NA	NA	3.2 (0.007044)	NA	2.2 (0.01041)	NA	NA	NA
intrinsic component of membrane	NA	NA	NA	NA	NA	NA	NA	NA	NA	NA	NA	NA	NA	2.9 (5e-06)	NA	NA	NA	NA	NA	NA	NA	NA	NA	NA	NA	NA	NA	NA	NA	NA	NA	NA	NA	NA	NA	NA	NA	NA	NA	NA	NA
intrinsic component of plasma membrane	NA	NA	NA	NA	NA	NA	4.5 (0.029901)	NA	2.1 (0.002661)	NA	NA	NA	NA	NA	NA	NA	NA	NA	NA	NA	NA	NA	NA	NA	NA	NA	NA	NA	NA	NA	NA	NA	NA	NA	NA	NA	NA	NA	NA	NA	NA
intronic snoRNA processing	NA	NA	NA	NA	NA	NA	NA	NA	NA	NA	NA	NA	NA	NA	10 (0.003238)	NA	NA	NA	NA	NA	NA	NA	NA	NA	NA	NA	NA	NA	NA	NA	NA	NA	NA	NA	NA	NA	NA	NA	NA	NA	NA
ion transport	NA	NA	NA	2.1 (0.00081)	NA	NA	NA	NA	NA	NA	NA	NA	NA	NA	NA	NA	NA	NA	NA	NA	NA	NA	NA	NA	NA	NA	NA	NA	NA	NA	NA	NA	NA	NA	2.1 (0.047399)	NA	NA	NA	NA	NA	NA
ketol-acid reductoisomerase activity	NA	NA	NA	NA	NA	NA	NA	NA	NA	NA	NA	NA	NA	NA	NA	NA	NA	NA	NA	NA	NA	NA	NA	NA	NA	NA	9.4 (0.005597)	NA	NA	4 (0.002892)	NA	NA	NA	NA	NA	NA	NA	NA	NA	NA	7.7 (0.001195)
lipid droplet	NA	NA	NA	NA	2.3 (0.038603)	NA	4.5 (0.017233)	NA	NA	NA	NA	NA	NA	NA	NA	NA	NA	NA	NA	NA	NA	NA	NA	NA	NA	NA	NA	NA	NA	NA	NA	NA	NA	NA	NA	NA	NA	NA	NA	NA	NA
lipid localization	NA	NA	NA	2.1 (0.005365)	2.3 (0.005365)	2.2 (0.002288)	NA	NA	NA	NA	NA	NA	NA	6.1 (0.024842)	NA	NA	NA	NA	25 (0.007277)	NA	NA	NA	NA	NA	NA	NA	NA	NA	NA	NA	NA	NA	NA	NA	NA	NA	NA	NA	NA	NA	NA
lipoprotein metabolic process	NA	NA	NA	NA	NA	NA	NA	NA	NA	2.3 (0.002323)	NA	NA	NA	NA	NA	NA	NA	NA	NA	NA	NA	NA	NA	NA	NA	NA	NA	NA	NA	NA	NA	NA	NA	NA	NA	NA	NA	NA	2.2 (0.008662)	NA	NA
lyase activity	NA	NA	NA	NA	NA	NA	2.8 (0.027413)	NA	NA	NA	NA	NA	NA	NA	NA	NA	NA	NA	NA	NA	NA	NA	NA	NA	NA	NA	NA	NA	NA	NA	NA	NA	NA	NA	NA	NA	NA	NA	NA	NA	NA
lysophospholipid acyltransferase activity	NA	NA	NA	NA	NA	NA	NA	NA	NA	NA	NA	NA	NA	NA	NA	NA	NA	NA	NA	NA	NA	NA	NA	NA	NA	NA	NA	2.7 (0.036055)	NA	NA	NA	NA	NA	NA	NA	NA	NA	NA	4.7 (0.018884)	NA	NA
lytic vacuole	NA	NA	NA	NA	NA	NA	NA	NA	NA	NA	NA	NA	NA	3.7 (0.015268)	NA	NA	NA	NA	NA	NA	NA	NA	NA	NA	NA	NA	NA	NA	NA	NA	NA	NA	NA	NA	NA	NA	NA	NA	NA	NA	NA
macrolide binding	NA	NA	NA	NA	NA	NA	NA	NA	NA	NA	NA	NA	NA	NA	NA	NA	NA	NA	NA	NA	NA	NA	NA	NA	NA	NA	NA	NA	NA	NA	NA	NA	NA	NA	NA	NA	NA	7.7 (0.034526)	NA	NA	NA
magnesium ion binding	NA	NA	NA	NA	NA	NA	NA	NA	NA	NA	NA	NA	NA	NA	NA	NA	NA	NA	NA	NA	NA	NA	NA	NA	NA	NA	NA	NA	NA	NA	NA	NA	NA	NA	NA	NA	NA	2.4 (0.00537)	NA	NA	NA
maintenance of transcriptional fidelity during DNA-templated transcription elongation	NA	NA	NA	NA	NA	NA	NA	NA	NA	NA	NA	NA	8.3 (0.019802)	100 (0.019802)	NA	NA	NA	NA	NA	NA	NA	NA	NA	NA	NA	NA	NA	NA	NA	NA	NA	NA	NA	NA	NA	NA	NA	NA	NA	NA	NA
maintenance of translational fidelity	NA	7.7 (0.010081)	NA	NA	NA	NA	NA	NA	NA	NA	NA	NA	NA	33.3 (0.039836)	NA	NA	NA	NA	NA	NA	NA	NA	NA	NA	NA	NA	NA	NA	NA	NA	NA	NA	NA	NA	NA	NA	NA	NA	NA	NA	NA
mannitol 2-dehydrogenase activity	NA	NA	NA	NA	NA	NA	NA	NA	NA	NA	NA	NA	NA	NA	NA	NA	NA	NA	NA	33.3 (0.040541)	NA	NA	NA	NA	NA	NA	NA	NA	NA	NA	NA	NA	NA	NA	NA	NA	NA	NA	NA	NA	NA
meiotic cell cycle phase transition	NA	NA	NA	NA	NA	NA	NA	NA	NA	9.1 (0.04918)	NA	7.7 (0.04918)	NA	NA	NA	NA	NA	NA	NA	NA	NA	NA	NA	NA	NA	NA	6.2 (0.04918)	NA	NA	NA	NA	NA	NA	NA	NA	NA	NA	NA	NA	NA	NA
meiotic spindle pole body	NA	NA	NA	NA	NA	NA	NA	NA	NA	25 (0.015625)	NA	NA	NA	NA	NA	NA	NA	NA	NA	NA	NA	NA	NA	NA	NA	NA	NA	NA	NA	NA	NA	NA	NA	NA	NA	NA	NA	NA	NA	NA	NA
membrane biogenesis	NA	NA	NA	NA	NA	3.6 (0.038212)	NA	NA	NA	7 (9.7e-05)	NA	2.9 (0.036472)	2.2 (0.011196)	NA	NA	NA	NA	4.8 (0.012893)	NA	6.5 (0.000361)	NA	NA	NA	7.7 (0.012893)	NA	2.1 (0.000922)	NA	NA	4.3 (0.004173)	NA	NA	NA	NA	2.7 (0.000464)	NA	11.8 (0.000156)	NA	7.8 (5.1e-05)	NA	NA	NA
membrane lipid metabolic process	NA	NA	NA	NA	NA	NA	NA	NA	NA	NA	NA	NA	NA	NA	NA	NA	NA	NA	NA	NA	NA	NA	NA	NA	NA	NA	NA	NA	NA	NA	NA	NA	NA	NA	NA	NA	NA	NA	2.2 (0.017256)	NA	NA
metal cluster binding	NA	NA	NA	NA	NA	NA	NA	NA	NA	NA	NA	NA	NA	NA	NA	NA	NA	NA	NA	NA	NA	NA	NA	NA	NA	NA	2.2 (0.009161)	NA	NA	NA	NA	NA	NA	NA	NA	NA	NA	NA	NA	NA	NA
metal ion export	NA	NA	NA	NA	NA	NA	NA	NA	NA	NA	NA	NA	NA	NA	NA	NA	NA	NA	NA	NA	2.4 (0.047619)	NA	NA	NA	NA	NA	NA	NA	NA	NA	NA	NA	NA	NA	NA	NA	NA	NA	NA	NA	NA
metallo-sulfur cluster assembly	NA	NA	NA	4.3 (0.028678)	NA	NA	NA	NA	NA	NA	NA	NA	NA	NA	NA	NA	NA	NA	NA	NA	NA	NA	NA	NA	NA	NA	2.3 (0.042111)	NA	NA	NA	NA	NA	NA	NA	NA	NA	NA	NA	NA	NA	NA
methionine adenosyltransferase activity	NA	NA	NA	NA	NA	NA	NA	NA	NA	NA	NA	NA	NA	100 (0.046512)	NA	NA	NA	NA	NA	NA	NA	NA	NA	NA	NA	NA	NA	NA	NA	4 (0.046512)	NA	NA	NA	NA	NA	NA	NA	NA	NA	NA	NA
methylglyoxal reductase (NADPH-dependent) activity	NA	NA	NA	NA	NA	NA	NA	20 (0.013514)	NA	NA	NA	NA	NA	NA	NA	NA	NA	NA	NA	NA	NA	NA	NA	NA	NA	NA	NA	NA	NA	NA	NA	NA	NA	NA	NA	NA	NA	NA	NA	NA	NA
mevalonate kinase activity	NA	NA	NA	NA	NA	NA	NA	NA	NA	NA	NA	NA	NA	NA	NA	NA	NA	NA	NA	NA	NA	NA	NA	NA	NA	NA	20 (0.032922)	NA	NA	NA	NA	NA	NA	NA	NA	NA	NA	NA	NA	NA	NA
microtubule organizing center attachment site	NA	NA	NA	NA	NA	NA	NA	NA	NA	NA	NA	NA	NA	NA	NA	2.4 (0.02069)	NA	NA	NA	NA	NA	NA	NA	NA	NA	NA	NA	NA	NA	NA	NA	NA	NA	NA	NA	NA	NA	NA	NA	NA	NA
mismatched DNA binding	NA	NA	NA	NA	NA	NA	NA	NA	NA	NA	NA	NA	NA	NA	NA	NA	NA	NA	NA	5.7 (0.025319)	NA	NA	NA	NA	NA	NA	NA	NA	NA	NA	NA	NA	NA	NA	NA	NA	NA	NA	NA	NA	NA
mitochondrial iron-sulfur cluster assembly complex	NA	NA	NA	50 (0.015789)	NA	50 (0.005263)	NA	NA	NA	NA	NA	NA	NA	NA	NA	NA	NA	NA	NA	NA	NA	NA	NA	NA	NA	NA	NA	NA	NA	NA	NA	NA	NA	NA	NA	NA	NA	NA	NA	NA	NA
mitochondrial transport	NA	NA	NA	NA	NA	NA	NA	NA	NA	NA	NA	NA	NA	NA	NA	NA	NA	NA	NA	NA	NA	NA	NA	NA	NA	NA	NA	NA	NA	NA	NA	NA	NA	NA	NA	NA	NA	NA	2.4 (0.001132)	NA	NA
modification-dependent protein binding	NA	NA	NA	NA	NA	NA	NA	NA	NA	NA	12.5 (0.022852)	NA	NA	NA	NA	NA	NA	NA	NA	NA	NA	NA	NA	NA	NA	NA	NA	NA	NA	NA	NA	NA	NA	NA	NA	NA	NA	NA	NA	NA	NA
modified amino acid transport	NA	NA	NA	NA	NA	NA	NA	2.8 (0.044353)	NA	NA	NA	NA	NA	NA	NA	NA	NA	11.1 (0.017948)	NA	NA	NA	NA	NA	NA	NA	2.4 (0.026819)	NA	NA	NA	NA	NA	NA	NA	NA	NA	NA	3.7 (0.03562)	NA	NA	NA	4.3 (0.004403)
molecular function inhibitor activity	NA	NA	NA	NA	NA	NA	NA	NA	NA	NA	NA	NA	NA	NA	NA	NA	NA	NA	NA	5 (0.04294)	NA	NA	NA	NA	NA	NA	NA	NA	NA	NA	NA	NA	NA	NA	NA	NA	NA	NA	NA	NA	NA
molecular sequestering activity	NA	NA	NA	NA	NA	NA	NA	NA	NA	NA	NA	NA	NA	NA	NA	NA	10 (0.02293)	NA	NA	NA	NA	NA	NA	NA	NA	NA	NA	NA	NA	NA	NA	NA	NA	NA	NA	NA	NA	NA	NA	NA	NA
molecular transducer activity	NA	NA	NA	NA	NA	NA	NA	NA	NA	NA	NA	5.1 (0.002788)	NA	NA	NA	NA	NA	NA	NA	NA	NA	NA	NA	NA	NA	NA	4.2 (0.005014)	NA	NA	NA	NA	NA	NA	NA	NA	NA	NA	NA	NA	2.4 (0.021571)	NA
monooxygenase activity	NA	NA	NA	NA	NA	NA	NA	NA	NA	NA	NA	NA	NA	NA	NA	NA	NA	NA	NA	6.2 (0.020331)	NA	NA	NA	NA	NA	NA	NA	NA	NA	NA	NA	NA	NA	NA	NA	NA	NA	NA	NA	NA	NA
multi-organism cellular process	NA	NA	NA	NA	NA	NA	NA	NA	NA	NA	NA	NA	NA	NA	NA	NA	NA	NA	NA	NA	NA	NA	NA	4.7 (0.001856)	NA	NA	2.2 (0.000516)	NA	NA	NA	NA	NA	NA	NA	NA	NA	NA	NA	NA	NA	NA
multivesicular body sorting pathway	NA	NA	NA	NA	NA	NA	NA	NA	NA	NA	NA	NA	NA	6.1 (0.014927)	NA	NA	NA	NA	NA	NA	NA	NA	NA	NA	NA	NA	NA	NA	NA	NA	NA	NA	NA	NA	5.1 (0.014927)	NA	NA	NA	NA	NA	NA
ncRNA metabolic process	NA	NA	NA	NA	NA	NA	NA	NA	NA	NA	NA	NA	NA	NA	2.1 (6.8e-05)	NA	NA	NA	NA	NA	NA	NA	NA	NA	NA	NA	NA	NA	NA	NA	NA	NA	NA	NA	NA	NA	NA	NA	NA	NA	NA
ncRNA transcription	NA	NA	NA	NA	NA	NA	NA	NA	NA	NA	NA	NA	NA	NA	4.8 (1e-06)	NA	NA	NA	NA	NA	NA	NA	NA	NA	NA	NA	NA	NA	NA	NA	NA	NA	NA	NA	NA	NA	NA	NA	NA	NA	NA
negative regulation of transcription by transcription factor localization	NA	NA	NA	NA	NA	NA	NA	NA	NA	NA	NA	NA	NA	NA	NA	NA	NA	100 (0.047619)	NA	NA	NA	NA	NA	NA	NA	NA	NA	NA	NA	NA	NA	NA	NA	NA	NA	NA	NA	NA	NA	NA	NA
nitrogen cycle metabolic process	NA	NA	NA	NA	NA	NA	NA	NA	4.5 (0.015939)	NA	NA	NA	NA	NA	NA	NA	NA	NA	NA	NA	NA	NA	NA	NA	NA	NA	NA	NA	NA	NA	NA	NA	NA	NA	NA	NA	NA	NA	NA	NA	2.6 (0.031665)
nitrogen utilization	NA	NA	NA	5 (0.004415)	5.6 (0.004415)	5.3 (0.004415)	NA	NA	2.5 (0.012695)	NA	NA	NA	NA	NA	NA	NA	NA	NA	NA	NA	NA	NA	NA	NA	NA	NA	NA	NA	NA	NA	NA	NA	NA	NA	NA	NA	NA	NA	NA	NA	NA
nuclear mRNA surveillance of mRNP export	33.3 (0.033333)	NA	NA	NA	NA	NA	NA	NA	NA	NA	NA	25 (0.033333)	NA	NA	NA	NA	NA	NA	NA	NA	NA	NA	NA	NA	NA	16.7 (0.033333)	NA	NA	NA	NA	NA	NA	NA	NA	NA	NA	NA	NA	NA	NA	NA
nuclear periphery	NA	NA	NA	NA	NA	NA	NA	NA	NA	NA	NA	NA	NA	5.7 (0.023326)	NA	NA	NA	NA	NA	NA	NA	NA	NA	NA	NA	NA	NA	NA	NA	NA	NA	NA	NA	NA	NA	NA	NA	NA	NA	NA	NA
nuclear-transcribed mRNA catabolic process, endonucleolytic cleavage-dependent decay	NA	NA	NA	NA	NA	NA	NA	NA	NA	NA	NA	NA	NA	NA	7.9 (0.001716)	NA	NA	NA	NA	NA	NA	NA	NA	NA	NA	NA	NA	NA	NA	NA	NA	NA	NA	NA	NA	NA	NA	NA	NA	NA	NA
nuclear-transcribed mRNA catabolic process, exonucleolytic	NA	NA	NA	NA	NA	NA	NA	NA	NA	NA	NA	NA	NA	NA	NA	NA	NA	NA	NA	NA	NA	NA	NA	NA	NA	NA	NA	NA	NA	NA	NA	NA	NA	NA	NA	NA	NA	NA	4 (0.003434)	NA	NA
nuclear-transcribed mRNA catabolic process, non-stop decay	NA	NA	NA	NA	NA	NA	NA	NA	NA	NA	NA	NA	NA	NA	NA	NA	NA	NA	NA	NA	NA	NA	NA	NA	NA	NA	NA	NA	NA	NA	NA	NA	NA	NA	NA	NA	NA	NA	2.9 (0.044301)	NA	NA
nucleic acid phosphodiester bond hydrolysis	NA	NA	NA	NA	NA	NA	NA	NA	NA	NA	NA	NA	NA	NA	2.1 (0.002431)	NA	NA	NA	NA	NA	NA	NA	NA	NA	NA	NA	NA	NA	NA	NA	NA	NA	NA	NA	NA	NA	NA	NA	NA	NA	NA
nucleobase binding	NA	NA	NA	25 (0.009373)	NA	NA	NA	NA	NA	NA	NA	11.1 (0.034922)	NA	NA	NA	NA	NA	NA	NA	NA	NA	NA	NA	NA	NA	NA	9.1 (0.039531)	12.5 (0.000472)	NA	NA	NA	NA	NA	NA	NA	NA	NA	NA	11.1 (0.02335)	NA	7.7 (0.014043)
nucleobase transport	NA	NA	NA	NA	NA	NA	NA	NA	NA	NA	NA	NA	3.8 (0.010106)	NA	NA	NA	NA	NA	NA	7.7 (0.00622)	NA	NA	NA	NA	NA	NA	NA	NA	NA	NA	NA	5.1 (0.003224)	NA	2.4 (0.04562)	NA	10 (0.034392)	NA	NA	NA	NA	NA
nucleolus	NA	NA	NA	NA	NA	NA	NA	NA	NA	NA	NA	NA	NA	NA	3.9 (0)	NA	NA	NA	NA	NA	NA	NA	NA	NA	NA	NA	NA	NA	NA	NA	NA	NA	NA	NA	NA	NA	NA	NA	NA	NA	NA
nucleoside diphosphate metabolic process	NA	NA	NA	NA	3.9 (0.025097)	NA	NA	NA	NA	NA	NA	NA	NA	NA	NA	NA	NA	NA	NA	NA	NA	NA	NA	NA	NA	NA	3.7 (0.047179)	NA	NA	NA	NA	NA	NA	NA	NA	NA	NA	NA	NA	NA	NA
nucleoside monophosphate metabolic process	NA	NA	NA	NA	NA	3.8 (0.04014)	13.2 (0.008202)	NA	NA	NA	NA	NA	NA	NA	4.1 (0.0017)	NA	NA	NA	NA	NA	NA	NA	NA	NA	NA	NA	NA	NA	NA	NA	NA	NA	NA	NA	NA	NA	NA	NA	NA	NA	NA
nucleoside triphosphate metabolic process	NA	NA	NA	NA	NA	NA	NA	NA	NA	NA	NA	NA	NA	NA	NA	NA	NA	NA	NA	NA	NA	NA	NA	NA	NA	NA	NA	NA	NA	NA	NA	NA	NA	NA	NA	NA	NA	NA	2.3 (0.008144)	NA	NA
nucleoside-triphosphate diphosphatase activity	NA	NA	NA	NA	NA	NA	NA	NA	NA	NA	NA	NA	NA	NA	4.3 (0.047658)	NA	NA	NA	NA	NA	NA	NA	NA	NA	NA	NA	NA	NA	NA	NA	NA	NA	NA	NA	NA	NA	NA	NA	NA	NA	NA
nucleotide phosphorylation	NA	NA	NA	4.3 (0.019544)	4.7 (0.019544)	NA	9.1 (0.006874)	NA	NA	NA	NA	NA	NA	NA	NA	NA	NA	NA	NA	NA	NA	NA	NA	NA	NA	NA	3.6 (0.004861)	2.4 (0.000292)	NA	NA	NA	NA	NA	NA	NA	NA	NA	NA	NA	NA	NA
nucleotidyltransferase activity	NA	NA	NA	NA	NA	NA	NA	NA	NA	NA	NA	NA	NA	NA	3 (1.3e-05)	NA	NA	NA	NA	NA	NA	NA	NA	NA	NA	NA	NA	NA	NA	NA	NA	NA	NA	NA	NA	NA	NA	NA	NA	NA	NA
odorant binding	NA	NA	NA	NA	NA	NA	NA	NA	NA	NA	NA	11.1 (0.048904)	8.3 (0.022259)	NA	NA	NA	NA	NA	NA	NA	NA	NA	NA	NA	NA	8.3 (0.007448)	NA	6.2 (0.048904)	NA	4 (0.031627)	NA	11.1 (0.014867)	NA	NA	100 (0.009474)	NA	NA	NA	NA	20 (0.001356)	NA
olefinic compound metabolic process	NA	NA	NA	NA	NA	NA	NA	NA	NA	NA	NA	NA	NA	NA	NA	NA	NA	NA	NA	NA	4.8 (0.029827)	NA	NA	NA	NA	NA	NA	NA	NA	NA	NA	NA	NA	NA	NA	NA	NA	NA	NA	NA	NA
oligosaccharide metabolic process	NA	NA	NA	NA	NA	NA	NA	NA	2.5 (0.024986)	NA	NA	NA	NA	NA	NA	NA	NA	NA	NA	NA	NA	NA	11.1 (0.024986)	NA	NA	NA	NA	NA	NA	NA	NA	NA	NA	NA	NA	NA	NA	NA	NA	NA	NA
one-carbon metabolic process	NA	NA	NA	NA	NA	NA	NA	NA	NA	NA	NA	NA	NA	18.2 (0.014355)	NA	NA	NA	NA	NA	NA	NA	NA	NA	NA	NA	NA	NA	NA	NA	NA	NA	NA	NA	NA	NA	NA	NA	NA	NA	NA	NA
organelle fission	NA	NA	NA	NA	NA	NA	NA	NA	NA	NA	NA	NA	NA	NA	NA	NA	NA	NA	NA	NA	NA	NA	NA	NA	NA	NA	NA	NA	NA	NA	NA	NA	NA	NA	2.2 (0.001407)	NA	NA	NA	NA	NA	NA
organic acid metabolic process	NA	NA	NA	NA	NA	NA	NA	NA	NA	NA	NA	NA	NA	3.3 (0.008117)	NA	NA	NA	NA	NA	NA	NA	NA	NA	NA	NA	NA	NA	NA	NA	NA	NA	NA	NA	NA	NA	NA	NA	NA	NA	NA	NA
organic acid transport	NA	NA	NA	NA	NA	NA	NA	NA	NA	NA	NA	NA	NA	NA	NA	NA	NA	NA	NA	NA	NA	NA	NA	NA	NA	NA	NA	NA	NA	NA	NA	NA	2.6 (0.008144)	NA	NA	NA	NA	NA	2.2 (0.004964)	NA	NA
organic hydroxy compound catabolic process	NA	NA	NA	NA	NA	NA	NA	NA	NA	NA	NA	4 (0.035434)	NA	NA	NA	NA	NA	NA	NA	NA	NA	NA	NA	NA	NA	NA	NA	NA	NA	NA	NA	NA	NA	NA	NA	NA	NA	NA	NA	NA	NA
organophosphate ester transport	NA	NA	NA	NA	NA	NA	NA	NA	NA	NA	NA	NA	NA	6.5 (0.044674)	NA	NA	NA	2.1 (0.019852)	28.6 (0.007)	NA	NA	NA	NA	NA	NA	NA	NA	NA	NA	NA	NA	NA	NA	NA	NA	NA	NA	NA	NA	NA	NA
organophosphate metabolic process	NA	NA	NA	NA	NA	NA	2.2 (0.009551)	NA	NA	NA	NA	NA	NA	NA	NA	NA	NA	NA	NA	NA	NA	NA	NA	NA	NA	NA	NA	NA	NA	NA	NA	NA	NA	NA	NA	NA	NA	NA	NA	NA	NA
origin recognition complex	NA	NA	NA	2.8 (0.011816)	NA	NA	NA	NA	NA	NA	NA	2.4 (0.006825)	NA	NA	NA	NA	NA	NA	NA	NA	NA	NA	NA	NA	NA	NA	2.3 (0.000263)	NA	NA	NA	NA	NA	NA	NA	NA	NA	NA	NA	NA	NA	NA
ornithine metabolic process	NA	NA	NA	NA	NA	NA	NA	NA	NA	NA	NA	NA	NA	NA	NA	NA	NA	NA	NA	NA	2.4 (0.042622)	NA	NA	NA	NA	NA	NA	NA	NA	NA	NA	NA	NA	NA	NA	NA	NA	NA	NA	NA	NA
ornithine(lysine) transaminase activity	NA	NA	NA	NA	NA	NA	NA	NA	NA	NA	NA	NA	NA	NA	NA	NA	NA	NA	NA	NA	9.1 (0.045455)	NA	NA	NA	NA	NA	NA	NA	NA	NA	NA	NA	NA	NA	NA	NA	NA	NA	NA	NA	NA
ornithine-oxo-acid transaminase activity	NA	NA	NA	NA	NA	NA	NA	NA	NA	NA	NA	NA	NA	NA	NA	NA	NA	NA	NA	NA	9.1 (0.045455)	NA	NA	NA	NA	NA	NA	NA	NA	NA	NA	NA	NA	NA	NA	NA	NA	NA	NA	NA	NA
oxazole or thiazole metabolic process	NA	NA	NA	NA	NA	NA	NA	NA	NA	NA	NA	NA	NA	NA	NA	NA	NA	NA	NA	33.3 (0.013544)	NA	NA	NA	NA	NA	NA	NA	NA	NA	NA	NA	NA	NA	NA	NA	NA	NA	33.3 (0.008465)	NA	NA	NA
oxidoreductase activity, acting on NAD(P)H	NA	NA	NA	NA	NA	NA	NA	NA	NA	NA	NA	NA	NA	NA	NA	NA	NA	NA	NA	4.2 (0.011813)	NA	NA	NA	NA	NA	NA	NA	NA	NA	NA	NA	NA	NA	NA	NA	NA	NA	NA	NA	NA	NA
oxidoreductase activity, acting on iron-sulfur proteins as donors	NA	NA	NA	NA	NA	NA	NA	NA	NA	NA	NA	NA	NA	NA	NA	NA	10 (0.018575)	NA	NA	NA	NA	NA	NA	NA	NA	NA	NA	NA	NA	NA	NA	NA	NA	NA	NA	NA	NA	NA	NA	NA	NA
oxidoreductase activity, acting on other nitrogenous compounds as donors	NA	NA	NA	NA	NA	NA	NA	NA	NA	NA	NA	NA	NA	NA	NA	NA	NA	NA	NA	NA	NA	NA	NA	NA	NA	NA	NA	NA	NA	NA	NA	NA	NA	NA	NA	NA	6.7 (0.012422)	NA	NA	NA	NA
oxidoreductase activity, acting on paired donors, with incorporation or reduction of molecular oxygen	NA	NA	NA	NA	NA	NA	NA	NA	NA	NA	NA	NA	NA	NA	NA	NA	NA	NA	NA	NA	NA	NA	NA	NA	NA	NA	NA	NA	3.1 (0.024633)	NA	NA	NA	NA	NA	NA	NA	NA	NA	NA	NA	NA
oxidoreductase activity, acting on single donors with incorporation of molecular oxygen	NA	NA	NA	NA	NA	NA	NA	NA	NA	NA	NA	NA	NA	NA	NA	NA	NA	20 (0.024729)	NA	NA	NA	NA	NA	NA	NA	NA	NA	NA	NA	4 (0.010043)	NA	NA	NA	NA	NA	NA	NA	NA	NA	NA	NA
oxidoreductase activity, acting on superoxide radicals as acceptor	NA	NA	NA	NA	NA	NA	33.3 (0.03692)	NA	NA	NA	NA	NA	NA	NA	NA	NA	NA	NA	NA	NA	NA	NA	NA	NA	NA	NA	NA	NA	NA	NA	NA	NA	NA	NA	NA	NA	NA	NA	NA	NA	NA
oxidoreductase activity, acting on the CH-NH group of donors	NA	NA	NA	NA	NA	NA	NA	NA	NA	NA	NA	NA	NA	NA	NA	NA	NA	NA	NA	NA	NA	NA	NA	NA	NA	2.2 (0.011539)	NA	NA	NA	NA	NA	NA	NA	NA	NA	NA	NA	NA	NA	NA	NA
oxidoreduction-driven active transmembrane transporter activity	NA	NA	NA	NA	NA	NA	NA	NA	NA	NA	NA	NA	NA	NA	NA	NA	NA	NA	NA	NA	NA	NA	NA	NA	NA	NA	4.4 (0.036248)	NA	NA	NA	NA	NA	NA	NA	NA	NA	NA	NA	NA	NA	NA
oxygen binding	NA	NA	NA	NA	NA	NA	NA	10 (0.006912)	NA	14.3 (0.025228)	NA	11.1 (0.034322)	NA	NA	12.5 (0.034322)	NA	NA	NA	NA	NA	NA	NA	NA	NA	NA	NA	9.1 (0.041115)	NA	NA	4 (0.043374)	NA	11.1 (0.027506)	NA	NA	NA	NA	12.5 (0.002307)	NA	NA	NA	7.7 (0.013801)
pentosyltransferase activity	NA	NA	NA	NA	NA	NA	NA	NA	NA	NA	NA	NA	NA	NA	NA	NA	NA	NA	NA	NA	NA	NA	NA	NA	NA	NA	NA	NA	NA	NA	NA	NA	NA	NA	NA	NA	NA	3.5 (0.034267)	NA	NA	NA
peptide catabolic process	NA	NA	NA	NA	NA	NA	NA	NA	NA	NA	NA	NA	NA	NA	NA	NA	NA	NA	NA	NA	NA	NA	NA	NA	NA	NA	NA	3.3 (0.04064)	NA	NA	NA	NA	NA	NA	NA	NA	NA	NA	NA	NA	NA
peptide crotonyltransferase activity	NA	NA	NA	NA	NA	NA	NA	NA	NA	NA	NA	NA	NA	NA	NA	NA	10 (0.041667)	NA	NA	NA	NA	NA	NA	NA	NA	NA	NA	NA	NA	NA	NA	NA	NA	NA	NA	NA	NA	NA	NA	NA	NA
peptide pheromone maturation	NA	NA	NA	NA	NA	NA	NA	NA	NA	NA	NA	NA	NA	NA	NA	NA	NA	NA	NA	NA	NA	NA	NA	NA	NA	NA	4.3 (0.021012)	NA	NA	NA	NA	NA	NA	NA	NA	NA	NA	NA	NA	NA	NA
peptide transport	NA	NA	NA	NA	NA	NA	NA	NA	NA	NA	NA	NA	NA	NA	NA	NA	NA	NA	NA	NA	NA	NA	NA	NA	NA	NA	NA	NA	NA	NA	NA	NA	NA	NA	NA	NA	NA	NA	6.5 (0.019883)	NA	NA
peptidyl-serine acetylation	NA	NA	NA	NA	NA	NA	NA	NA	NA	NA	NA	NA	NA	NA	NA	NA	NA	NA	NA	16.7 (0.027397)	NA	NA	NA	50 (0.027397)	NA	NA	NA	NA	16.7 (0.027397)	NA	NA	11.1 (0.027397)	NA	NA	NA	NA	NA	16.7 (0.027397)	NA	NA	NA
peptidyl-tyrosine dephosphorylation	NA	NA	NA	NA	NA	NA	NA	NA	NA	NA	NA	2.4 (0.04085)	NA	NA	NA	NA	NA	NA	NA	NA	NA	NA	NA	NA	NA	NA	NA	NA	NA	NA	NA	NA	NA	NA	NA	NA	NA	NA	NA	NA	NA
phagophore assembly site	NA	NA	NA	NA	NA	NA	NA	NA	NA	NA	NA	NA	NA	NA	NA	NA	NA	NA	NA	2.4 (0.023157)	NA	NA	NA	NA	NA	NA	NA	NA	NA	NA	NA	NA	NA	NA	NA	NA	NA	NA	NA	NA	NA
phenylalanine transport	NA	NA	NA	NA	NA	NA	NA	NA	18.2 (0.009805)	NA	NA	NA	NA	NA	NA	NA	NA	NA	NA	NA	NA	NA	NA	NA	NA	NA	NA	NA	NA	NA	NA	NA	NA	NA	NA	NA	NA	NA	NA	NA	NA
phosphatidyl phospholipase B activity	NA	NA	NA	NA	NA	NA	NA	NA	NA	NA	NA	NA	NA	NA	NA	NA	NA	NA	NA	NA	NA	NA	NA	NA	NA	NA	NA	6.1 (0.010274)	NA	NA	NA	NA	NA	NA	NA	NA	NA	NA	NA	NA	NA
phosphatidyl-N-dimethylethanolamine N-methyltransferase activity	NA	NA	NA	NA	NA	NA	NA	NA	NA	NA	NA	NA	NA	NA	NA	NA	NA	NA	NA	NA	NA	NA	NA	NA	NA	NA	NA	NA	33.3 (0.02381)	NA	NA	NA	NA	NA	NA	NA	NA	NA	NA	NA	NA
phosphatidyl-N-methylethanolamine N-methyltransferase activity	NA	NA	NA	NA	NA	NA	NA	NA	NA	NA	NA	NA	NA	NA	NA	NA	NA	NA	NA	NA	NA	NA	NA	NA	NA	NA	NA	NA	33.3 (0.02381)	NA	NA	NA	NA	NA	NA	NA	NA	NA	NA	NA	NA
phosphatidylethanolamine N-methyltransferase activity	NA	NA	NA	NA	NA	NA	NA	NA	NA	NA	NA	NA	NA	NA	NA	NA	NA	NA	NA	NA	NA	NA	NA	NA	NA	NA	NA	NA	16.7 (0.047619)	NA	NA	NA	NA	NA	NA	NA	NA	NA	NA	NA	NA
phosphatidylglycerophosphatase activity	NA	NA	NA	NA	NA	NA	NA	NA	NA	NA	NA	NA	NA	NA	NA	NA	NA	NA	NA	NA	NA	NA	NA	NA	NA	NA	20 (0.028169)	NA	NA	NA	NA	NA	NA	NA	NA	NA	NA	33.3 (0.014085)	NA	NA	NA
phosphoacetylglucosamine mutase activity	NA	NA	NA	NA	NA	NA	NA	NA	NA	NA	NA	NA	NA	NA	NA	NA	NA	NA	NA	33.3 (0.025641)	NA	NA	NA	NA	NA	NA	NA	NA	NA	NA	NA	NA	NA	NA	NA	NA	NA	NA	NA	NA	NA
phosphoenolpyruvate carboxykinase activity	NA	NA	NA	NA	NA	NA	NA	NA	NA	NA	NA	NA	NA	NA	NA	NA	NA	NA	NA	NA	NA	NA	NA	100 (0.043478)	NA	NA	NA	NA	NA	NA	NA	25 (0.043478)	NA	NA	100 (0.043478)	NA	NA	NA	NA	NA	NA
phosphogluconate dehydrogenase (decarboxylating) activity	NA	NA	NA	NA	50 (0.027027)	NA	NA	NA	NA	NA	NA	NA	NA	NA	NA	NA	NA	NA	NA	NA	NA	NA	NA	NA	NA	NA	NA	NA	NA	NA	NA	NA	NA	NA	NA	NA	NA	NA	NA	NA	NA
phosphopantetheine-dependent carrier activity	NA	NA	NA	50 (0.043478)	NA	50 (0.043478)	NA	NA	NA	NA	NA	NA	NA	NA	NA	NA	NA	NA	NA	NA	NA	NA	NA	NA	NA	NA	NA	NA	NA	NA	NA	NA	NA	NA	NA	NA	NA	NA	NA	NA	NA
phosphoprotein binding	NA	NA	NA	NA	NA	NA	12.5 (0.027197)	NA	NA	NA	NA	NA	NA	NA	NA	NA	NA	NA	NA	NA	NA	NA	NA	12.5 (0.036114)	NA	NA	NA	NA	NA	NA	NA	NA	7.7 (0.018206)	NA	NA	NA	NA	NA	NA	NA	NA
phosphopyruvate hydratase complex	NA	NA	NA	25 (0.019608)	33.3 (0.019608)	33.3 (0.019608)	50 (0.019608)	NA	NA	NA	NA	NA	NA	NA	NA	NA	NA	NA	NA	NA	NA	NA	NA	NA	NA	NA	NA	6.2 (0.039022)	NA	NA	NA	NA	NA	NA	NA	NA	NA	NA	NA	NA	NA
phosphoribosyl-ATP diphosphatase activity	NA	NA	NA	NA	NA	50 (0.004032)	NA	NA	NA	NA	NA	NA	NA	NA	NA	NA	NA	NA	NA	NA	9.1 (0.022177)	NA	NA	NA	NA	NA	NA	NA	NA	8.3 (0.008065)	NA	NA	NA	NA	NA	NA	NA	NA	NA	NA	NA
phosphoribosylaminoimidazole carboxylase activity	NA	NA	NA	NA	NA	NA	NA	NA	NA	NA	NA	NA	NA	NA	25 (0.043478)	NA	NA	NA	NA	NA	NA	NA	NA	NA	NA	NA	NA	NA	NA	NA	NA	NA	NA	NA	NA	NA	NA	NA	NA	NA	NA
phosphotransferase activity, carboxyl group as acceptor	NA	NA	NA	3.9 (0.024689)	4.3 (0.024689)	NA	8.7 (0.004486)	NA	NA	NA	NA	NA	NA	NA	NA	NA	NA	NA	NA	NA	NA	NA	NA	NA	NA	NA	3.4 (0.004698)	2.2 (9e-04)	NA	NA	NA	NA	NA	NA	NA	NA	NA	NA	NA	NA	NA
phosphotransferase activity, for other substituted phosphate groups	NA	NA	NA	NA	NA	NA	NA	NA	NA	NA	NA	NA	NA	NA	NA	NA	NA	NA	NA	NA	NA	NA	NA	NA	NA	NA	NA	NA	NA	NA	NA	NA	NA	NA	NA	NA	NA	NA	3 (0.041515)	NA	NA
pigment metabolic process	NA	NA	NA	NA	NA	NA	NA	NA	NA	NA	NA	2.6 (0.042764)	NA	NA	NA	NA	NA	NA	NA	NA	NA	NA	NA	NA	NA	NA	NA	NA	NA	NA	NA	NA	NA	NA	NA	NA	NA	NA	NA	NA	NA
pole plasm	NA	NA	NA	NA	NA	NA	NA	NA	NA	NA	NA	NA	NA	NA	25 (0.028247)	NA	NA	NA	NA	NA	NA	NA	NA	NA	NA	NA	NA	NA	NA	NA	NA	NA	NA	NA	NA	NA	NA	NA	NA	NA	NA
polyamine transport	NA	NA	NA	NA	NA	NA	NA	NA	NA	6.4 (0.002588)	NA	NA	NA	NA	NA	NA	NA	NA	NA	5.3 (0.013064)	NA	NA	NA	NA	NA	NA	4.4 (0.003044)	NA	NA	NA	NA	NA	NA	NA	NA	NA	NA	NA	NA	NA	NA
polygalacturonase activity	NA	NA	NA	NA	NA	NA	NA	NA	NA	NA	NA	NA	NA	NA	NA	NA	NA	100 (0.026316)	NA	NA	NA	NA	NA	NA	NA	NA	NA	NA	NA	NA	NA	NA	NA	NA	NA	NA	NA	NA	NA	NA	NA
polysaccharide localization	NA	NA	NA	NA	NA	NA	NA	NA	NA	NA	NA	NA	NA	NA	NA	NA	10 (0.019715)	NA	NA	NA	NA	NA	NA	NA	NA	NA	NA	NA	NA	NA	NA	NA	NA	NA	NA	NA	NA	NA	NA	NA	NA
post-translational protein modification	NA	NA	NA	NA	NA	NA	NA	NA	NA	NA	25 (0.029142)	NA	NA	NA	NA	NA	NA	NA	NA	NA	NA	NA	NA	NA	NA	NA	NA	NA	NA	NA	NA	NA	NA	NA	NA	NA	NA	NA	3.5 (0.029383)	NA	NA
preribosome	NA	NA	NA	NA	NA	NA	NA	NA	NA	NA	NA	NA	NA	NA	3.6 (0.000113)	NA	NA	NA	NA	NA	NA	NA	NA	NA	NA	NA	NA	NA	NA	NA	NA	NA	NA	NA	NA	NA	NA	NA	NA	NA	NA
proline transmembrane transport	NA	NA	NA	NA	NA	NA	NA	NA	13.3 (0.018423)	NA	NA	NA	NA	NA	NA	NA	NA	NA	NA	NA	NA	NA	NA	NA	NA	NA	NA	NA	16.7 (0.035661)	NA	NA	NA	NA	NA	NA	NA	NA	NA	NA	NA	NA
prospore membrane leading edge	NA	NA	NA	NA	NA	NA	NA	NA	NA	NA	NA	NA	NA	NA	NA	NA	NA	NA	NA	16.7 (0.034898)	NA	NA	NA	NA	NA	NA	NA	NA	NA	NA	NA	NA	NA	NA	NA	NA	NA	NA	NA	NA	NA
prosthetic group binding	NA	NA	NA	50 (0.009834)	NA	50 (0.005086)	NA	NA	NA	NA	NA	NA	NA	NA	NA	NA	NA	NA	NA	NA	NA	NA	NA	NA	NA	NA	NA	NA	NA	NA	NA	NA	NA	NA	NA	NA	NA	NA	NA	NA	NA
protease binding	NA	NA	NA	NA	NA	NA	NA	NA	NA	NA	NA	NA	NA	NA	NA	NA	NA	NA	NA	NA	NA	NA	NA	NA	NA	NA	NA	NA	NA	NA	NA	NA	NA	NA	NA	NA	NA	NA	3 (0.039056)	NA	NA
protein de-ADP-ribosylation	NA	NA	NA	NA	NA	NA	NA	NA	NA	25 (0.01956)	NA	25 (0.022005)	NA	NA	NA	NA	NA	NA	NA	NA	NA	NA	NA	NA	NA	NA	NA	NA	NA	NA	NA	NA	NA	NA	NA	NA	NA	NA	NA	NA	NA
protein dealkylation	NA	NA	NA	NA	NA	NA	NA	NA	NA	NA	NA	NA	NA	NA	NA	NA	NA	NA	NA	NA	NA	NA	NA	NA	NA	NA	NA	NA	NA	NA	100 (0.007335)	NA	NA	NA	NA	NA	NA	NA	NA	NA	NA
protein deglutathionylation	NA	NA	25 (0.004887)	NA	NA	NA	NA	NA	NA	NA	NA	NA	NA	NA	NA	NA	NA	NA	NA	NA	NA	NA	NA	NA	NA	NA	NA	NA	NA	NA	NA	NA	NA	NA	NA	NA	NA	NA	NA	NA	NA
protein dimerization activity	NA	NA	NA	3.2 (0.009599)	2.3 (0.039929)	NA	NA	NA	NA	2.7 (0.002843)	NA	4 (2e-06)	NA	6.1 (0.029406)	2.5 (0.003502)	NA	NA	NA	NA	NA	NA	NA	NA	NA	NA	NA	4.4 (0)	2.1 (7e-06)	NA	NA	NA	NA	NA	NA	NA	NA	NA	NA	NA	NA	NA
protein localization to cell division site	NA	NA	NA	NA	NA	NA	NA	NA	NA	NA	NA	NA	NA	NA	NA	NA	NA	NA	NA	NA	NA	NA	NA	NA	100 (0.020478)	NA	NA	NA	NA	NA	NA	NA	NA	NA	NA	NA	NA	NA	NA	NA	NA
protein maturation by copper ion transfer	NA	NA	NA	NA	NA	NA	NA	NA	NA	NA	NA	NA	NA	NA	9.1 (0.042853)	NA	NA	NA	NA	NA	NA	NA	NA	NA	NA	NA	NA	NA	NA	2.7 (0.021583)	NA	NA	NA	NA	NA	NA	NA	NA	NA	NA	NA
protein phosphatase 2B binding	NA	NA	NA	NA	NA	NA	NA	NA	NA	NA	NA	NA	NA	NA	NA	7.1 (0.026316)	NA	NA	NA	NA	NA	NA	NA	NA	NA	NA	NA	NA	NA	NA	NA	NA	NA	NA	NA	NA	NA	NA	NA	NA	NA
protein repair	NA	NA	NA	NA	NA	NA	NA	NA	NA	NA	NA	NA	NA	NA	NA	NA	NA	NA	NA	NA	NA	NA	NA	NA	NA	NA	NA	NA	NA	NA	NA	NA	NA	NA	NA	NA	NA	33.3 (0.010388)	NA	NA	NA
protein tag	NA	NA	NA	NA	NA	NA	NA	NA	NA	NA	33.3 (0.027873)	NA	NA	NA	NA	NA	NA	NA	NA	NA	NA	NA	NA	NA	NA	NA	NA	NA	NA	NA	NA	NA	NA	NA	NA	NA	NA	NA	NA	NA	NA
protein-DNA complex	NA	NA	NA	2.1 (0.024795)	NA	NA	NA	NA	NA	NA	NA	2.1 (0.00061)	NA	NA	NA	NA	NA	NA	NA	NA	NA	NA	NA	NA	NA	NA	NA	NA	NA	NA	NA	NA	NA	NA	NA	NA	NA	NA	NA	NA	NA
proton-transporting two-sector ATPase complex	NA	NA	NA	NA	NA	NA	NA	NA	NA	NA	NA	NA	NA	NA	NA	NA	NA	NA	NA	NA	NA	NA	NA	NA	NA	NA	NA	NA	NA	NA	NA	NA	NA	NA	NA	NA	NA	NA	3.9 (0.023018)	NA	NA
pteridine-containing compound metabolic process	NA	NA	NA	NA	NA	NA	NA	NA	NA	NA	NA	NA	NA	9.1 (0.043033)	NA	NA	NA	NA	NA	NA	NA	NA	NA	NA	NA	NA	NA	NA	NA	NA	NA	NA	NA	NA	NA	NA	NA	NA	NA	NA	NA
purine nucleoside monophosphate metabolic process	NA	NA	NA	NA	NA	NA	NA	NA	NA	NA	NA	NA	NA	NA	NA	NA	NA	NA	NA	NA	2.7 (0.031261)	NA	NA	NA	NA	NA	NA	NA	NA	2.3 (0.006662)	NA	NA	NA	NA	NA	NA	NA	NA	NA	NA	NA
purine-containing compound metabolic process	NA	NA	NA	NA	NA	NA	4.1 (0.007033)	NA	NA	NA	NA	NA	NA	NA	NA	NA	NA	NA	NA	NA	NA	NA	NA	NA	NA	NA	NA	NA	NA	NA	NA	NA	NA	NA	NA	NA	NA	NA	NA	NA	NA
purine-containing compound transmembrane transport	NA	NA	NA	NA	NA	NA	NA	NA	NA	NA	NA	NA	NA	NA	NA	NA	NA	NA	NA	NA	NA	NA	NA	NA	NA	NA	NA	NA	NA	2.4 (0.007216)	NA	NA	NA	NA	NA	NA	NA	NA	NA	NA	NA
pyridine-containing compound metabolic process	NA	NA	NA	NA	NA	NA	NA	NA	NA	4 (0.001328)	NA	3.3 (0.009612)	NA	NA	NA	NA	NA	NA	NA	2.5 (0.029807)	NA	NA	NA	NA	NA	NA	NA	NA	NA	NA	NA	NA	NA	NA	NA	NA	NA	2.2 (0.022854)	NA	NA	NA
pyrimidine nucleoside triphosphate metabolic process	NA	NA	NA	NA	NA	NA	NA	NA	NA	NA	NA	NA	NA	NA	NA	NA	NA	NA	NA	NA	NA	NA	NA	NA	NA	NA	NA	3.1 (0.018182)	NA	NA	NA	NA	NA	NA	NA	NA	NA	NA	NA	NA	NA
pyrimidine-containing compound metabolic process	NA	NA	NA	NA	NA	NA	8 (0.033952)	NA	NA	NA	NA	NA	NA	NA	2.6 (0.036527)	NA	NA	NA	NA	NA	NA	NA	NA	NA	NA	NA	NA	NA	NA	NA	NA	NA	NA	NA	NA	NA	NA	NA	NA	NA	NA
quinone binding	NA	NA	NA	NA	NA	NA	NA	3.8 (0.01182)	5.6 (0.015177)	NA	NA	NA	NA	NA	NA	NA	NA	NA	NA	NA	NA	NA	NA	NA	NA	NA	NA	NA	NA	NA	NA	NA	NA	NA	NA	NA	NA	NA	NA	NA	NA
rRNA binding	NA	NA	NA	NA	NA	NA	NA	NA	NA	NA	NA	NA	NA	NA	2.7 (0.015758)	NA	NA	NA	NA	NA	NA	NA	NA	NA	NA	NA	NA	NA	NA	NA	NA	NA	NA	NA	NA	NA	NA	NA	NA	NA	NA
rRNA metabolic process	NA	NA	NA	NA	NA	NA	NA	NA	NA	NA	NA	NA	NA	NA	2.8 (0.002697)	NA	NA	NA	NA	NA	NA	NA	NA	NA	NA	NA	NA	NA	NA	NA	NA	NA	NA	NA	NA	NA	NA	NA	NA	NA	NA
racemase and epimerase activity	NA	NA	NA	NA	NA	NA	NA	NA	NA	NA	NA	NA	NA	NA	NA	NA	NA	NA	NA	6.9 (0.029095)	NA	NA	NA	NA	NA	NA	NA	NA	NA	NA	NA	NA	NA	NA	NA	NA	NA	NA	NA	NA	NA
racemase and epimerase activity, acting on amino acids and derivatives	NA	NA	NA	NA	NA	NA	NA	NA	NA	NA	NA	NA	NA	NA	NA	NA	NA	NA	NA	33.3 (0.022222)	NA	NA	NA	NA	NA	NA	NA	NA	NA	NA	NA	NA	NA	NA	NA	NA	NA	NA	NA	NA	NA
reactive nitrogen species metabolic process	NA	NA	NA	NA	NA	NA	NA	2.8 (0.02317)	NA	NA	NA	NA	NA	NA	NA	NA	NA	NA	NA	NA	NA	NA	NA	NA	NA	NA	NA	NA	NA	NA	NA	NA	NA	NA	NA	NA	3.7 (0.020874)	NA	NA	NA	2.2 (0.03685)
reactive oxygen species metabolic process	NA	NA	NA	NA	NA	NA	15.4 (0.00194)	NA	NA	NA	NA	NA	NA	NA	NA	NA	NA	NA	NA	NA	NA	NA	NA	NA	NA	NA	NA	NA	NA	NA	NA	NA	NA	NA	NA	NA	NA	NA	NA	NA	NA
receptor complex	NA	NA	NA	NA	NA	NA	NA	NA	NA	NA	NA	25 (0.019851)	16.7 (0.010422)	NA	NA	NA	NA	NA	NA	NA	NA	NA	NA	NA	NA	NA	20 (0.026303)	12.5 (0.01737)	NA	8.3 (0.004963)	NA	NA	NA	NA	NA	NA	NA	NA	NA	NA	NA
regulation of transcription by glucose	NA	NA	NA	NA	NA	NA	NA	NA	NA	4.3 (0.039814)	NA	NA	NA	NA	NA	NA	NA	NA	NA	NA	NA	NA	NA	NA	NA	NA	NA	NA	NA	NA	NA	NA	NA	NA	NA	NA	NA	NA	NA	NA	NA
replication fork	NA	NA	NA	2.7 (0.015381)	NA	NA	NA	NA	NA	NA	NA	2.3 (0.012913)	NA	NA	NA	NA	NA	NA	NA	NA	NA	NA	NA	NA	NA	NA	2.2 (0.000402)	NA	NA	NA	NA	NA	NA	NA	NA	NA	NA	NA	NA	NA	NA
replication fork protection complex	NA	NA	NA	NA	NA	NA	NA	NA	NA	NA	NA	5.4 (0.024579)	NA	NA	NA	NA	NA	NA	NA	NA	NA	NA	NA	NA	NA	NA	5.1 (0.01229)	3.3 (0.01229)	NA	NA	NA	NA	NA	NA	NA	NA	NA	NA	NA	NA	NA
reproduction	NA	NA	NA	NA	NA	NA	NA	NA	NA	NA	NA	NA	NA	NA	NA	NA	NA	NA	NA	NA	NA	NA	NA	NA	NA	NA	NA	NA	NA	NA	NA	NA	NA	NA	2.8 (0.004296)	NA	NA	NA	NA	NA	NA
reproduction of a single-celled organism	NA	NA	NA	NA	NA	NA	NA	NA	NA	NA	NA	NA	NA	NA	NA	NA	NA	NA	NA	NA	NA	NA	NA	NA	NA	NA	NA	NA	NA	NA	NA	NA	NA	NA	5.9 (0.015889)	NA	NA	NA	NA	NA	NA
respirasome	NA	NA	NA	NA	NA	NA	NA	NA	NA	NA	NA	NA	NA	NA	NA	NA	NA	NA	NA	NA	NA	NA	NA	NA	NA	NA	2.4 (0.043565)	NA	NA	NA	NA	NA	NA	NA	NA	NA	NA	NA	NA	NA	NA
response to alcohol	NA	NA	NA	10 (0.046769)	11.1 (0.046769)	10.5 (0.046769)	NA	NA	NA	NA	NA	NA	NA	28.6 (0.046769)	NA	NA	NA	NA	NA	NA	NA	NA	NA	NA	NA	NA	NA	NA	NA	NA	NA	NA	NA	NA	NA	NA	NA	NA	NA	NA	NA
response to antibiotic	NA	NA	NA	NA	NA	NA	NA	NA	NA	NA	NA	NA	NA	25 (0.028864)	NA	NA	NA	NA	NA	NA	NA	NA	NA	NA	NA	NA	NA	NA	NA	NA	NA	NA	NA	NA	NA	NA	NA	NA	NA	NA	NA
response to arsenic-containing substance	5.4 (0.003322)	NA	NA	NA	NA	NA	NA	NA	NA	NA	NA	NA	NA	NA	NA	NA	NA	NA	NA	NA	NA	NA	NA	20 (0.014659)	NA	NA	NA	NA	NA	NA	NA	NA	12.5 (0.003322)	NA	NA	NA	NA	NA	NA	NA	NA
response to cold	NA	NA	NA	NA	NA	NA	NA	NA	NA	NA	NA	NA	NA	NA	NA	NA	NA	NA	NA	NA	NA	NA	50 (0.043478)	NA	NA	NA	NA	NA	NA	NA	NA	NA	NA	NA	NA	NA	NA	NA	NA	NA	NA
response to nitrosative stress	NA	NA	NA	NA	NA	NA	NA	6.2 (0.004087)	NA	9.1 (0.044348)	NA	NA	NA	NA	9.1 (0.044348)	NA	NA	NA	NA	NA	NA	NA	NA	NA	NA	NA	NA	NA	NA	2.7 (0.040372)	NA	7.7 (0.012228)	NA	NA	NA	NA	8.3 (0.008163)	NA	NA	NA	5 (0.016282)
response to organic cyclic compound	NA	NA	NA	NA	NA	NA	NA	NA	NA	NA	NA	NA	NA	NA	6.7 (0.018245)	NA	NA	NA	NA	NA	NA	NA	NA	NA	NA	NA	NA	NA	NA	NA	NA	NA	NA	NA	NA	NA	NA	4 (0.032787)	NA	NA	NA
response to oxygen levels	NA	NA	NA	NA	NA	NA	NA	NA	NA	NA	NA	NA	NA	NA	NA	NA	NA	NA	NA	NA	NA	NA	NA	NA	NA	NA	NA	NA	NA	NA	NA	NA	9.1 (0.049383)	NA	NA	NA	NA	NA	NA	NA	NA
response to oxygen-containing compound	NA	NA	NA	NA	NA	NA	NA	NA	NA	NA	NA	NA	NA	4.2 (0.025241)	NA	NA	NA	NA	NA	NA	NA	NA	NA	NA	NA	NA	NA	NA	NA	NA	NA	NA	NA	NA	NA	NA	NA	NA	NA	NA	NA
response to pheromone	NA	NA	NA	NA	NA	NA	NA	NA	NA	NA	NA	NA	NA	NA	NA	NA	NA	NA	NA	NA	NA	NA	NA	NA	NA	NA	2.7 (8.5e-05)	NA	NA	NA	NA	NA	NA	NA	NA	NA	NA	NA	NA	NA	NA
response to sterol depletion	NA	NA	NA	NA	NA	NA	NA	NA	NA	NA	NA	25 (0.025886)	NA	NA	NA	NA	NA	NA	NA	NA	NA	NA	NA	NA	NA	NA	NA	NA	NA	NA	NA	NA	NA	NA	NA	NA	NA	NA	NA	NA	NA
response to toxic substance	NA	NA	NA	NA	NA	NA	NA	NA	NA	3 (0.012481)	NA	NA	NA	NA	NA	NA	NA	NA	NA	NA	NA	NA	NA	NA	NA	NA	NA	NA	NA	NA	NA	NA	NA	NA	NA	NA	NA	NA	NA	NA	NA
response to xenobiotic stimulus	NA	NA	NA	4.3 (0.036743)	NA	NA	NA	NA	NA	NA	NA	NA	NA	NA	NA	NA	NA	NA	NA	NA	NA	NA	NA	NA	NA	NA	NA	NA	NA	NA	NA	NA	NA	NA	NA	NA	NA	NA	NA	NA	NA
ribitol-5-phosphatase activity	NA	NA	NA	NA	NA	NA	NA	NA	NA	NA	NA	NA	NA	NA	25 (0.028169)	NA	NA	NA	NA	NA	NA	NA	NA	NA	NA	NA	NA	NA	NA	NA	NA	NA	NA	NA	NA	NA	NA	NA	NA	NA	NA
riboflavin synthase complex	NA	NA	NA	NA	NA	NA	NA	NA	NA	NA	NA	NA	NA	NA	25 (0.046632)	NA	NA	NA	NA	NA	NA	NA	NA	NA	NA	NA	NA	NA	NA	NA	NA	NA	NA	NA	NA	NA	NA	NA	NA	NA	NA
ribonuclease MRP activity	NA	NA	NA	NA	NA	NA	NA	NA	NA	NA	NA	NA	NA	NA	10 (0.042019)	NA	NA	NA	NA	NA	NA	NA	NA	NA	NA	NA	NA	NA	NA	NA	NA	NA	NA	NA	NA	NA	NA	NA	NA	NA	NA
ribonucleoprotein complex biogenesis	NA	NA	NA	NA	NA	NA	NA	NA	NA	NA	NA	NA	NA	NA	2.8 (0)	NA	NA	NA	NA	NA	NA	NA	NA	NA	NA	NA	NA	NA	NA	NA	NA	NA	NA	NA	NA	NA	NA	NA	NA	NA	NA
ribose phosphate metabolic process	NA	NA	NA	NA	NA	NA	6 (0.046196)	NA	NA	NA	NA	NA	NA	NA	NA	NA	NA	NA	NA	NA	NA	NA	NA	NA	NA	NA	NA	NA	NA	NA	NA	NA	NA	NA	NA	NA	NA	NA	NA	NA	NA
ribosome biogenesis	NA	NA	NA	NA	NA	NA	NA	NA	NA	NA	NA	NA	NA	NA	3.2 (0.015746)	NA	NA	NA	NA	NA	NA	NA	NA	NA	NA	NA	NA	NA	NA	NA	NA	NA	NA	NA	NA	NA	NA	NA	NA	NA	NA
ribosylnicotinamide kinase activity	NA	NA	NA	NA	NA	NA	NA	NA	NA	25 (0.020576)	NA	25 (0.024691)	NA	NA	NA	NA	NA	NA	NA	NA	NA	NA	NA	NA	NA	NA	20 (0.032922)	NA	NA	NA	NA	NA	NA	NA	NA	NA	NA	NA	NA	NA	NA
secondary active transmembrane transporter activity	2.3 (0.037454)	NA	NA	NA	NA	NA	NA	NA	NA	2.7 (0.043101)	NA	NA	NA	NA	NA	NA	NA	NA	NA	NA	NA	NA	NA	NA	NA	NA	NA	NA	NA	NA	NA	NA	NA	NA	NA	NA	NA	NA	NA	NA	NA
secondary metabolic process	NA	NA	NA	NA	NA	NA	NA	NA	NA	NA	NA	NA	NA	NA	NA	NA	NA	NA	NA	NA	NA	NA	25 (0.027235)	NA	NA	NA	NA	NA	NA	NA	NA	NA	NA	NA	NA	NA	NA	NA	NA	NA	NA
serine hydrolase activity	NA	NA	NA	NA	NA	NA	NA	NA	NA	NA	NA	NA	NA	NA	NA	NA	NA	NA	NA	NA	NA	NA	NA	NA	NA	NA	NA	NA	NA	NA	NA	NA	NA	NA	NA	NA	NA	NA	2.1 (0.049716)	NA	NA
signaling receptor binding	NA	NA	NA	NA	NA	NA	NA	NA	NA	NA	NA	NA	NA	NA	NA	NA	4.7 (0.009573)	NA	NA	NA	NA	50 (0.016393)	NA	28.6 (0.000358)	NA	NA	4.3 (0.032784)	2.7 (0.026258)	NA	NA	NA	NA	NA	NA	NA	NA	NA	NA	NA	NA	NA
single strand break repair	NA	NA	NA	NA	NA	NA	NA	NA	NA	NA	NA	11.1 (0.042027)	NA	NA	NA	NA	NA	NA	NA	NA	NA	NA	NA	NA	NA	NA	NA	NA	NA	NA	NA	NA	NA	NA	NA	NA	NA	NA	NA	NA	NA
single-stranded RNA binding	NA	NA	NA	NA	NA	NA	NA	NA	NA	NA	NA	NA	NA	NA	NA	NA	NA	NA	NA	NA	NA	20 (0.041594)	NA	NA	NA	NA	NA	NA	NA	NA	NA	NA	NA	NA	NA	NA	NA	NA	NA	NA	NA
small GTPase mediated signal transduction	NA	NA	NA	NA	NA	NA	3.8 (0.043607)	NA	NA	NA	NA	NA	NA	NA	NA	NA	NA	NA	NA	NA	NA	NA	NA	NA	NA	NA	NA	NA	NA	NA	NA	NA	NA	NA	NA	NA	NA	NA	NA	NA	NA
small molecule biosynthetic process	NA	NA	NA	NA	NA	NA	NA	NA	NA	NA	NA	NA	NA	NA	NA	NA	NA	NA	NA	NA	NA	NA	NA	NA	NA	NA	2.1 (0.024575)	NA	NA	NA	NA	NA	NA	NA	NA	NA	NA	NA	NA	NA	NA
snRNA metabolic process	NA	NA	NA	NA	NA	NA	NA	NA	NA	NA	NA	NA	NA	NA	NA	NA	NA	NA	NA	NA	NA	NA	NA	NA	NA	NA	NA	NA	NA	NA	NA	NA	NA	NA	NA	NA	NA	NA	2.6 (0.015687)	NA	NA
sno(s)RNA-containing ribonucleoprotein complex	NA	NA	NA	NA	NA	NA	NA	NA	NA	NA	NA	NA	NA	NA	7 (0.000441)	NA	NA	NA	NA	NA	NA	NA	NA	NA	NA	NA	NA	NA	NA	NA	NA	NA	NA	NA	NA	NA	NA	NA	NA	NA	NA
snoRNA binding	NA	NA	NA	NA	NA	NA	NA	NA	NA	NA	NA	NA	NA	NA	4.4 (0.00819)	NA	NA	NA	NA	NA	NA	NA	NA	NA	NA	NA	NA	NA	NA	NA	NA	NA	NA	NA	NA	NA	NA	NA	NA	NA	NA
sorbitol-6-phosphatase activity	NA	NA	NA	NA	NA	NA	NA	NA	NA	NA	NA	NA	NA	NA	25 (0.028169)	NA	NA	NA	NA	NA	NA	NA	NA	NA	NA	NA	NA	NA	NA	NA	NA	NA	NA	NA	NA	NA	NA	NA	NA	NA	NA
spermidine synthase activity	NA	NA	NA	NA	NA	NA	NA	NA	NA	NA	NA	25 (0.023256)	NA	NA	NA	NA	NA	NA	NA	NA	NA	NA	NA	NA	NA	NA	20 (0.046512)	NA	NA	NA	NA	NA	NA	NA	NA	NA	NA	NA	NA	NA	NA
sphingolipid binding	NA	NA	NA	25 (0.027874)	33.3 (0.027874)	NA	NA	NA	NA	NA	NA	NA	NA	NA	NA	NA	NA	NA	NA	NA	NA	NA	NA	NA	NA	NA	9.1 (0.027874)	6.2 (0.027874)	NA	NA	NA	NA	NA	NA	NA	NA	NA	NA	NA	NA	NA
spliceosomal tri-snRNP complex	NA	NA	NA	NA	NA	NA	NA	NA	NA	NA	NA	NA	NA	NA	4 (0.027645)	NA	NA	NA	NA	NA	NA	NA	NA	NA	NA	NA	NA	NA	NA	NA	NA	NA	NA	NA	NA	NA	NA	NA	NA	NA	NA
splicing factor binding	NA	NA	NA	NA	NA	NA	NA	NA	NA	NA	NA	NA	NA	NA	12.5 (0.041624)	NA	NA	NA	NA	NA	NA	NA	NA	NA	NA	NA	NA	NA	NA	NA	NA	NA	NA	NA	NA	NA	NA	NA	NA	NA	NA
spore membrane bending pathway	NA	NA	NA	NA	NA	NA	NA	NA	NA	NA	NA	NA	NA	NA	NA	NA	NA	NA	NA	33.3 (0.028571)	NA	NA	NA	NA	NA	NA	NA	NA	NA	NA	NA	NA	NA	NA	NA	NA	NA	NA	NA	NA	NA
sporulation	NA	NA	NA	NA	NA	NA	NA	NA	NA	2.1 (0.010273)	NA	NA	NA	NA	NA	NA	NA	NA	NA	NA	NA	NA	NA	NA	NA	NA	NA	NA	NA	NA	NA	NA	NA	NA	7.1 (0.041825)	NA	NA	NA	NA	NA	NA
steroid dehydrogenase activity	NA	NA	NA	NA	NA	NA	NA	4.8 (0.03692)	NA	NA	NA	NA	NA	NA	NA	NA	NA	NA	NA	NA	NA	NA	NA	NA	NA	NA	NA	NA	NA	NA	NA	NA	NA	NA	NA	NA	NA	NA	NA	NA	NA
storage vacuole	NA	NA	NA	NA	NA	NA	NA	NA	NA	NA	NA	NA	NA	3.7 (0.015268)	NA	NA	NA	NA	NA	NA	NA	NA	NA	NA	NA	NA	NA	NA	NA	NA	NA	NA	NA	NA	NA	NA	NA	NA	NA	NA	NA
succinate-semialdehyde dehydrogenase [NAD(P)+] activity	NA	NA	NA	NA	NA	NA	NA	NA	25 (0.02439)	NA	NA	NA	NA	NA	NA	NA	NA	NA	NA	NA	NA	NA	NA	NA	NA	NA	NA	NA	NA	NA	NA	NA	NA	NA	NA	NA	NA	NA	NA	NA	NA
sulfur compound transmembrane transporter activity	NA	NA	NA	NA	NA	NA	NA	NA	NA	NA	NA	NA	NA	NA	NA	NA	NA	NA	NA	NA	NA	NA	NA	NA	NA	NA	NA	NA	NA	NA	NA	NA	NA	NA	NA	NA	NA	NA	NA	NA	2.9 (0.014325)
sulfur compound transport	NA	NA	NA	NA	NA	NA	NA	NA	NA	3.8 (0.013651)	NA	3.2 (0.016304)	NA	NA	NA	NA	NA	NA	NA	NA	NA	NA	NA	NA	NA	NA	3.4 (0.009988)	NA	NA	NA	NA	2.1 (0.033492)	NA	NA	NA	NA	2.4 (0.00758)	2.9 (0.041239)	NA	NA	2.8 (0.000408)
sulfuric ester hydrolase activity	NA	NA	NA	NA	NA	NA	NA	NA	NA	NA	NA	NA	NA	NA	NA	NA	NA	NA	NA	NA	NA	NA	NA	NA	NA	NA	NA	NA	NA	NA	NA	11.1 (0.033848)	NA	NA	NA	NA	NA	NA	NA	NA	NA
tRNA transcription	NA	NA	NA	NA	NA	NA	NA	NA	NA	NA	NA	NA	2.7 (0.026924)	NA	9.7 (0.015765)	NA	NA	NA	NA	NA	NA	NA	NA	NA	NA	NA	NA	NA	NA	NA	NA	NA	NA	NA	NA	NA	NA	NA	NA	NA	NA
telomerase RNA binding	NA	NA	NA	NA	NA	NA	NA	NA	NA	NA	NA	NA	3.4 (0.008666)	NA	NA	NA	NA	NA	NA	NA	NA	NA	NA	NA	NA	NA	NA	NA	NA	NA	NA	NA	NA	NA	NA	NA	NA	NA	NA	NA	NA
telomerase holoenzyme complex	NA	NA	NA	NA	NA	NA	NA	NA	NA	3.4 (0.03653)	NA	NA	4.3 (0.001173)	NA	NA	NA	NA	NA	NA	NA	NA	NA	NA	NA	NA	NA	NA	NA	NA	NA	NA	NA	NA	NA	NA	NA	NA	NA	NA	NA	NA
tetrapyrrole binding	NA	NA	NA	NA	NA	NA	NA	NA	NA	2.9 (0.03285)	NA	3.7 (0.013646)	NA	NA	NA	NA	NA	NA	NA	NA	NA	NA	NA	NA	NA	NA	3 (0.015186)	NA	NA	NA	NA	2.4 (0.012649)	NA	NA	NA	NA	NA	NA	NA	NA	NA
tetrapyrrole metabolic process	NA	2.1 (0.024297)	NA	NA	NA	NA	NA	NA	NA	NA	NA	NA	NA	NA	NA	NA	NA	NA	NA	NA	NA	NA	NA	NA	NA	NA	NA	NA	NA	NA	NA	NA	NA	NA	NA	NA	NA	NA	NA	NA	NA
thiaminase activity	NA	NA	NA	NA	NA	NA	NA	NA	NA	NA	NA	NA	NA	NA	NA	NA	NA	NA	NA	NA	NA	NA	NA	NA	NA	NA	20 (0.017241)	NA	NA	NA	NA	NA	NA	NA	NA	NA	NA	NA	NA	NA	NA
transcription by RNA polymerase I	NA	NA	NA	NA	NA	NA	NA	NA	NA	NA	NA	NA	NA	NA	4.3 (2e-06)	NA	NA	NA	NA	NA	NA	NA	NA	NA	NA	NA	NA	NA	NA	NA	NA	NA	NA	NA	NA	NA	NA	NA	NA	NA	NA
transcription by RNA polymerase III	NA	NA	NA	NA	NA	NA	NA	NA	NA	NA	NA	NA	NA	NA	4.5 (2e-04)	NA	NA	NA	NA	NA	NA	NA	NA	NA	NA	NA	NA	NA	NA	NA	NA	NA	NA	NA	NA	NA	NA	NA	NA	NA	NA
transcription regulatory region nucleic acid binding	NA	NA	NA	NA	NA	NA	NA	NA	NA	NA	2.7 (0.034028)	NA	NA	NA	NA	NA	NA	NA	NA	NA	NA	NA	NA	NA	NA	NA	NA	NA	NA	NA	NA	NA	NA	NA	NA	NA	NA	NA	NA	NA	NA
transcription repressor complex	NA	NA	NA	NA	NA	NA	NA	NA	NA	NA	NA	NA	NA	NA	NA	NA	5.3 (0.038462)	NA	NA	NA	NA	NA	NA	NA	NA	NA	NA	NA	NA	NA	NA	NA	NA	NA	NA	NA	NA	NA	NA	NA	NA
transcription, RNA-templated	NA	NA	NA	NA	NA	NA	NA	NA	NA	NA	NA	NA	4.3 (0.00063)	NA	11.1 (1.9e-05)	NA	NA	NA	NA	NA	NA	NA	NA	NA	NA	NA	NA	NA	NA	NA	NA	NA	NA	NA	NA	NA	NA	NA	7 (5.4e-05)	NA	NA
transcriptionally active chromatin	NA	NA	NA	NA	NA	NA	NA	NA	NA	NA	NA	NA	NA	NA	NA	NA	NA	NA	NA	NA	NA	NA	NA	NA	NA	NA	NA	NA	NA	NA	NA	NA	11.1 (0.039544)	NA	NA	NA	NA	NA	NA	NA	NA
transferase activity, transferring alkyl or aryl (other than methyl) groups	NA	NA	NA	NA	NA	NA	NA	NA	NA	NA	NA	NA	NA	NA	NA	NA	NA	NA	NA	NA	NA	NA	5.7 (0.017567)	NA	NA	NA	NA	NA	NA	NA	NA	NA	NA	NA	NA	NA	NA	NA	NA	NA	NA
transferase activity, transferring nitrogenous groups	NA	NA	NA	NA	NA	NA	NA	NA	NA	NA	NA	NA	NA	NA	NA	NA	NA	NA	NA	NA	NA	NA	NA	NA	NA	NA	NA	NA	NA	NA	NA	NA	3.3 (0.022634)	NA	NA	NA	NA	NA	NA	NA	2.1 (0.001092)
transferase activity, transferring one-carbon groups	NA	NA	NA	NA	NA	NA	NA	NA	NA	NA	NA	NA	NA	NA	2.2 (0.004856)	NA	NA	NA	NA	NA	NA	NA	NA	NA	NA	NA	NA	NA	NA	NA	NA	NA	NA	NA	NA	NA	NA	NA	NA	NA	NA
transketolase or transaldolase activity	NA	NA	NA	NA	NA	5.3 (0.044573)	NA	NA	NA	NA	NA	NA	NA	NA	NA	NA	NA	NA	NA	NA	NA	NA	NA	NA	NA	NA	5.2 (0.009726)	NA	NA	2.2 (0.001286)	NA	NA	6.7 (0.011317)	NA	NA	NA	NA	NA	NA	NA	4.2 (0.000124)
translation elongation factor activity	NA	NA	NA	NA	NA	NA	NA	NA	NA	NA	NA	NA	NA	25 (0.049774)	NA	NA	NA	NA	NA	NA	NA	NA	NA	NA	NA	NA	NA	NA	NA	NA	NA	NA	NA	NA	NA	NA	NA	NA	NA	NA	NA
translational frameshifting	NA	NA	NA	NA	NA	NA	NA	NA	NA	NA	NA	NA	NA	NA	NA	NA	NA	NA	NA	NA	NA	NA	NA	20 (0.012097)	NA	2.8 (0.012097)	NA	NA	NA	NA	NA	NA	NA	NA	NA	NA	NA	NA	NA	NA	NA
transporter activity	NA	NA	NA	NA	NA	NA	NA	NA	NA	NA	NA	NA	NA	3.1 (0.009827)	NA	NA	NA	NA	NA	NA	NA	NA	NA	2.3 (0.00697)	NA	NA	NA	NA	NA	NA	NA	NA	NA	NA	NA	NA	NA	NA	NA	NA	NA
ubiquitin conjugating enzyme complex	8.3 (0.015504)	NA	NA	NA	NA	NA	NA	NA	NA	NA	NA	NA	NA	NA	NA	NA	NA	NA	NA	NA	NA	NA	NA	NA	NA	NA	NA	3 (0.030827)	NA	NA	NA	NA	NA	NA	NA	NA	NA	NA	NA	NA	NA
ubiquitin-dependent protein catabolic process via the N-end rule pathway	NA	NA	NA	NA	NA	NA	NA	NA	NA	NA	NA	NA	NA	NA	NA	NA	NA	NA	NA	NA	NA	NA	NA	NA	NA	NA	NA	4.2 (0.039996)	NA	NA	NA	NA	NA	NA	NA	NA	NA	NA	NA	NA	NA
unsaturated fatty acid metabolic process	NA	NA	NA	50 (0.033333)	50 (0.016667)	50 (0.033333)	NA	NA	NA	NA	NA	NA	NA	100 (0.033333)	NA	NA	NA	NA	NA	NA	NA	NA	NA	NA	NA	NA	NA	NA	33.3 (0.033333)	NA	NA	NA	NA	NA	NA	NA	NA	NA	NA	NA	NA
uridylyltransferase activity	NA	NA	NA	NA	NA	NA	NA	NA	NA	NA	NA	NA	NA	NA	NA	NA	NA	NA	NA	NA	NA	NA	NA	NA	NA	NA	NA	NA	NA	NA	NA	NA	NA	7.1 (0.028037)	NA	NA	NA	NA	NA	NA	NA
uroporphyrinogen decarboxylase activity	NA	NA	NA	NA	NA	NA	NA	NA	NA	NA	NA	NA	NA	NA	NA	NA	NA	NA	NA	NA	NA	NA	NA	NA	NA	NA	NA	NA	NA	NA	NA	NA	NA	NA	NA	NA	NA	NA	20 (0.043478)	NA	NA
uroporphyrinogen-III synthase activity	33.3 (0.037736)	33.3 (0.018868)	NA	NA	NA	NA	NA	20 (0.018868)	NA	NA	NA	NA	NA	NA	NA	7.1 (0.018868)	NA	NA	NA	NA	9.1 (0.037736)	NA	NA	NA	NA	16.7 (0.018868)	NA	NA	NA	NA	NA	NA	NA	20 (0.018868)	NA	NA	NA	NA	NA	NA	NA
very long-chain fatty acid metabolic process	NA	NA	NA	NA	NA	NA	NA	NA	NA	NA	NA	NA	NA	NA	NA	NA	NA	NA	NA	NA	NA	NA	NA	NA	NA	NA	NA	4.1 (0.02081)	NA	NA	NA	NA	NA	NA	NA	NA	NA	NA	NA	NA	NA
very-long-chain 3-ketoacyl-CoA synthase activity	NA	NA	NA	NA	NA	NA	NA	10 (0.037912)	NA	NA	NA	NA	8.3 (0.019048)	100 (0.037912)	NA	NA	NA	NA	NA	NA	4.8 (0.037912)	NA	NA	NA	NA	NA	NA	12.5 (0.001099)	NA	NA	NA	NA	NA	NA	NA	NA	NA	NA	NA	NA	NA
vitamin transport	NA	NA	NA	NA	NA	NA	NA	NA	NA	NA	NA	NA	NA	NA	NA	NA	NA	6.7 (0.042762)	NA	NA	NA	NA	NA	NA	NA	NA	NA	NA	NA	NA	NA	NA	NA	NA	NA	NA	NA	NA	NA	NA	NA
xenobiotic transport	NA	NA	NA	NA	11.1 (0.008698)	NA	NA	NA	NA	NA	NA	NA	NA	NA	NA	NA	NA	NA	NA	NA	NA	50 (0.008689)	NA	NA	NA	NA	NA	NA	NA	NA	NA	NA	NA	NA	NA	NA	NA	NA	NA	NA	NA
zinc ion transport	NA	NA	NA	NA	NA	NA	NA	NA	NA	NA	NA	NA	NA	NA	5.3 (0.029221)	NA	NA	NA	NA	NA	NA	NA	NA	NA	NA	NA	NA	NA	NA	NA	NA	NA	NA	NA	NA	NA	NA	NA	NA	NA	NA

## Sheet: Up Diff. Transcribed Genes
term	bre1	bur2	bye1	cac1	cac2	cac3	cbc1	ccr4	cdc39	cdc73	chd1	ctr9	dhh1	dst1	eaf1	elf1	gcn5	hda1	hpc2	htz1	ino80	isw1	isw2	leo1	nap1	npl3	paf1	rad6	rco1	rpb4	rph1	rsc30	rtf1	rtt103	set2	set3	spt4	swr1	ubp8	vps15	vps34
'de novo' protein folding	NA	NA	NA	NA	NA	NA	NA	NA	6.6 (0.03915)	NA	NA	NA	NA	NA	NA	NA	NA	NA	NA	NA	NA	NA	NA	NA	NA	NA	NA	NA	NA	4.8 (0.002169)	NA	NA	NA	NA	NA	NA	NA	NA	NA	NA	NA
(D)-2-hydroxyglutarate-pyruvate transhydrogenase activity	NA	NA	NA	NA	NA	NA	33.3 (0.037975)	NA	NA	NA	NA	NA	NA	NA	NA	NA	NA	NA	NA	NA	NA	NA	NA	NA	NA	NA	NA	NA	NA	NA	NA	NA	NA	NA	NA	NA	NA	NA	NA	NA	NA
1,4-alpha-glucan branching enzyme activity	NA	NA	NA	NA	NA	NA	33.3 (0.027778)	NA	NA	NA	NA	14.3 (0.027778)	11.1 (0.041667)	NA	NA	NA	NA	NA	NA	NA	NA	NA	NA	NA	NA	NA	14.3 (0.027778)	NA	NA	NA	NA	NA	NA	NA	NA	NA	NA	NA	NA	NA	NA
1,4-alpha-glucan branching enzyme activity (using a glucosylated glycogenin as primer for glycogen synthesis)	NA	NA	NA	NA	NA	NA	33.3 (0.027778)	NA	NA	NA	NA	14.3 (0.027778)	11.1 (0.041667)	NA	NA	NA	NA	NA	NA	NA	NA	NA	NA	NA	NA	NA	14.3 (0.027778)	NA	NA	NA	NA	NA	NA	NA	NA	NA	NA	NA	NA	NA	NA
2-aminoadipate transaminase activity	NA	NA	NA	NA	NA	NA	NA	NA	NA	NA	NA	NA	NA	NA	NA	NA	16.7 (0.012987)	NA	NA	NA	NA	NA	NA	NA	NA	NA	NA	NA	NA	NA	NA	NA	NA	NA	NA	NA	NA	NA	NA	NA	NA
2-methylcitrate dehydratase activity	NA	NA	NA	NA	NA	NA	NA	NA	NA	NA	NA	NA	NA	NA	NA	NA	NA	NA	NA	NA	NA	NA	NA	NA	NA	NA	14.3 (0.037736)	16.7 (0.037736)	NA	NA	NA	NA	NA	NA	NA	NA	NA	NA	8.3 (0.018868)	NA	NA
3-isopropylmalate dehydratase complex	NA	NA	NA	NA	NA	NA	NA	NA	50 (0.029412)	NA	NA	NA	NA	NA	NA	NA	NA	NA	NA	NA	NA	NA	NA	NA	NA	NA	NA	NA	NA	NA	NA	NA	NA	NA	NA	NA	NA	NA	NA	NA	NA
3-isopropylmalate dehydrogenase activity	NA	NA	NA	14.3 (0.027027)	14.3 (0.027027)	33.3 (0.027027)	NA	NA	NA	NA	NA	NA	NA	NA	NA	NA	NA	NA	NA	NA	NA	NA	NA	NA	NA	NA	NA	NA	12.5 (0.027027)	NA	NA	NA	NA	NA	NA	NA	NA	NA	NA	NA	NA
4-hydroxyphenylpyruvate decarboxylase activity	50 (0.043478)	NA	NA	NA	NA	33.3 (0.043478)	NA	33.3 (0.043478)	50 (0.043478)	NA	NA	NA	NA	NA	NA	NA	NA	NA	NA	NA	NA	NA	NA	Inf (0.043478)	Inf (0.043478)	100 (0.043478)	NA	NA	NA	NA	Inf (0.043478)	NA	33.3 (0.043478)	NA	NA	NA	NA	NA	8.3 (0.043478)	NA	NA
5-methyltetrahydropteroyltri-L-glutamate-dependent methyltransferase activity	NA	NA	NA	NA	NA	NA	NA	NA	50 (0.020408)	NA	NA	NA	NA	NA	NA	NA	25 (0.040816)	NA	NA	NA	NA	NA	NA	NA	NA	NA	NA	NA	NA	NA	NA	NA	NA	NA	NA	NA	NA	NA	NA	NA	NA
ADP binding	NA	NA	NA	NA	NA	NA	NA	NA	NA	NA	NA	NA	NA	NA	NA	NA	NA	NA	NA	NA	NA	NA	NA	NA	NA	NA	NA	NA	NA	10 (0.029461)	NA	NA	NA	NA	NA	NA	NA	NA	NA	NA	NA
ADP-ribose diphosphatase activity	NA	NA	NA	NA	NA	NA	NA	NA	NA	NA	NA	NA	NA	NA	NA	NA	NA	NA	NA	NA	25 (0.022177)	NA	NA	NA	NA	NA	NA	NA	NA	NA	NA	NA	NA	NA	NA	NA	NA	NA	NA	NA	NA
ATP metabolic process	NA	NA	NA	NA	NA	NA	2.3 (0.017917)	5.7 (0)	NA	NA	NA	NA	NA	NA	NA	9.5 (0.003121)	4 (4.4e-05)	NA	NA	NA	NA	NA	NA	NA	NA	NA	NA	NA	NA	6.8 (0)	NA	NA	NA	NA	NA	NA	NA	NA	NA	NA	2.9 (0.014997)
ATP-dependent activity, acting on RNA	NA	NA	NA	NA	NA	NA	NA	NA	7.4 (0.002704)	NA	NA	NA	NA	NA	NA	NA	NA	NA	NA	NA	NA	NA	NA	NA	NA	NA	NA	NA	NA	NA	NA	NA	NA	NA	NA	NA	NA	NA	NA	NA	NA
ATPase binding	NA	NA	NA	NA	NA	NA	NA	NA	NA	NA	NA	NA	NA	NA	NA	NA	NA	NA	NA	NA	NA	NA	NA	NA	NA	50 (0.035997)	NA	NA	NA	NA	NA	NA	NA	NA	NA	NA	NA	NA	NA	NA	NA
CAF-1 complex	NA	NA	NA	NA	NA	NA	NA	NA	NA	14.3 (0.016296)	NA	4.8 (0.020709)	NA	NA	NA	NA	NA	NA	NA	NA	NA	NA	NA	NA	NA	NA	NA	NA	NA	NA	NA	NA	NA	NA	NA	NA	NA	NA	NA	NA	NA
CENP-A containing nucleosome binding	NA	50 (0.04)	100 (0.04)	NA	NA	NA	NA	NA	NA	NA	NA	NA	NA	NA	NA	100 (0.04)	NA	NA	NA	NA	25 (0.04)	NA	NA	NA	NA	NA	NA	16.7 (0.04)	NA	NA	NA	NA	NA	Inf (0.04)	NA	NA	50 (0.04)	NA	NA	NA	NA
COP9 signalosome	NA	NA	NA	NA	NA	NA	NA	NA	NA	NA	NA	NA	NA	NA	NA	NA	NA	NA	NA	NA	NA	NA	NA	NA	NA	NA	NA	4.7 (0.021119)	NA	NA	NA	NA	NA	NA	NA	NA	NA	NA	NA	NA	NA
Cul4-RING E3 ubiquitin ligase complex	NA	NA	NA	NA	NA	NA	NA	NA	NA	NA	NA	NA	NA	NA	NA	NA	NA	NA	NA	NA	NA	NA	NA	NA	NA	NA	NA	16.7 (0.046512)	NA	NA	NA	NA	NA	NA	NA	NA	NA	NA	NA	NA	NA
Cvt complex	11.1 (0.023951)	NA	NA	3.4 (0.04228)	7.4 (0.00064)	8.3 (0.039678)	9.1 (0.021311)	NA	NA	10 (0.023951)	NA	3.6 (0.034457)	7.9 (2.9e-05)	NA	2.7 (0.001718)	NA	12.5 (0.001587)	NA	NA	NA	NA	5.9 (0.016016)	NA	100 (0.008032)	NA	NA	10.7 (5e-06)	12 (0.000147)	3 (0.026585)	11.1 (0.003631)	NA	NA	7.1 (0.010699)	NA	NA	NA	NA	NA	NA	NA	21.4 (4.3e-05)
Cvt vesicle	NA	NA	NA	NA	NA	NA	NA	NA	NA	NA	NA	NA	NA	NA	NA	NA	NA	NA	NA	NA	NA	NA	NA	NA	NA	NA	NA	16.7 (0.038869)	NA	NA	NA	NA	NA	NA	NA	NA	NA	NA	NA	NA	25 (0.038869)
D-erythro-sphingosine kinase activity	NA	NA	NA	NA	NA	NA	NA	NA	NA	NA	NA	NA	NA	NA	NA	NA	NA	NA	NA	NA	NA	NA	NA	NA	NA	NA	NA	16.7 (0.038062)	NA	NA	NA	NA	NA	NA	NA	NA	NA	NA	NA	NA	NA
DNA packaging complex	NA	NA	NA	NA	NA	NA	NA	NA	NA	NA	NA	NA	NA	NA	NA	NA	NA	NA	8.3 (0.00794)	NA	NA	NA	NA	NA	NA	NA	NA	NA	NA	NA	NA	NA	NA	NA	NA	NA	NA	NA	NA	NA	NA
DNA repair complex assembly	NA	NA	NA	NA	3.2 (0.003545)	NA	NA	NA	NA	NA	NA	NA	NA	NA	NA	NA	NA	NA	NA	NA	NA	NA	6.7 (0.048993)	NA	NA	NA	NA	NA	NA	NA	NA	NA	NA	NA	NA	NA	NA	NA	NA	NA	NA
DNA replication-dependent chromatin organization	NA	NA	NA	NA	NA	NA	NA	NA	NA	10 (0.042397)	NA	3.6 (0.042397)	NA	NA	NA	NA	NA	NA	NA	NA	NA	NA	NA	NA	NA	NA	NA	NA	NA	NA	NA	NA	NA	NA	NA	NA	NA	NA	NA	NA	NA
DNA topological change	NA	NA	NA	NA	NA	NA	NA	NA	NA	NA	NA	NA	NA	NA	NA	NA	NA	NA	NA	NA	NA	NA	NA	NA	NA	NA	NA	4.1 (0.014423)	NA	NA	NA	NA	NA	NA	NA	NA	NA	NA	NA	NA	NA
DNA-binding transcription activator activity	NA	NA	NA	NA	NA	NA	NA	NA	NA	NA	NA	NA	NA	NA	NA	NA	NA	NA	NA	NA	NA	NA	NA	NA	NA	NA	NA	NA	NA	2.6 (0.039078)	NA	NA	NA	NA	NA	NA	NA	NA	NA	NA	NA
DNA-templated transcription, elongation	NA	NA	NA	NA	NA	NA	NA	NA	3.6 (0.012389)	NA	NA	NA	NA	NA	NA	NA	NA	NA	NA	NA	NA	NA	NA	NA	NA	NA	NA	NA	NA	NA	NA	NA	NA	NA	NA	NA	NA	NA	NA	NA	NA
DNA-templated transcription, initiation	NA	NA	3.7 (0.017532)	NA	NA	NA	NA	NA	NA	NA	NA	NA	NA	NA	NA	NA	NA	NA	NA	NA	NA	NA	NA	NA	NA	NA	NA	NA	NA	NA	NA	NA	NA	NA	NA	NA	NA	NA	NA	NA	NA
DNA-templated transcription, termination	NA	NA	NA	NA	NA	NA	NA	NA	6.3 (0.003157)	NA	NA	NA	NA	NA	NA	NA	NA	NA	NA	NA	NA	NA	NA	NA	NA	NA	NA	NA	NA	NA	NA	NA	NA	NA	NA	NA	NA	NA	NA	NA	NA
DUBm complex	NA	NA	NA	NA	NA	NA	NA	NA	6.1 (0.039787)	NA	NA	NA	NA	NA	NA	NA	NA	NA	NA	NA	NA	NA	NA	NA	NA	NA	NA	NA	NA	NA	NA	NA	NA	NA	NA	NA	NA	NA	NA	NA	NA
ESCRT complex assembly	NA	NA	NA	NA	NA	NA	NA	NA	NA	NA	NA	NA	NA	NA	NA	NA	NA	NA	NA	NA	NA	NA	NA	NA	NA	NA	NA	NA	NA	15.4 (0.011233)	NA	NA	NA	NA	NA	NA	NA	NA	NA	NA	NA
FMN binding	NA	NA	NA	NA	NA	NA	NA	NA	NA	NA	NA	NA	NA	NA	NA	NA	4.1 (0.025007)	NA	NA	NA	NA	NA	NA	NA	NA	NA	NA	NA	NA	NA	NA	NA	NA	NA	NA	NA	NA	NA	NA	NA	NA
G protein-coupled receptor signaling pathway	3.6 (0.033592)	NA	NA	NA	NA	NA	NA	NA	NA	NA	NA	NA	NA	NA	NA	NA	NA	NA	NA	NA	NA	NA	NA	NA	NA	NA	NA	NA	NA	NA	NA	NA	2.2 (0.033592)	NA	NA	NA	NA	NA	NA	NA	NA
G-quadruplex DNA formation	NA	NA	NA	NA	NA	NA	NA	NA	NA	NA	NA	NA	NA	NA	NA	NA	NA	NA	NA	NA	NA	NA	NA	NA	NA	NA	NA	NA	NA	NA	NA	NA	NA	NA	NA	100 (0.013453)	NA	NA	NA	NA	NA
GID complex	6.7 (0.031109)	16.7 (0.004261)	NA	NA	NA	NA	5 (0.031109)	NA	NA	NA	NA	NA	NA	NA	NA	NA	NA	NA	NA	25 (0.031109)	NA	NA	8.3 (0.031109)	50 (0.01566)	NA	NA	4.1 (0.004261)	NA	NA	NA	NA	25 (0.01566)	NA	NA	NA	NA	NA	NA	NA	NA	8 (0.020052)
GTP metabolic process	NA	NA	NA	NA	NA	NA	NA	NA	20 (0.043478)	NA	NA	NA	NA	NA	NA	NA	NA	NA	NA	NA	NA	NA	NA	NA	NA	NA	NA	NA	NA	NA	Inf (0.043478)	NA	NA	NA	NA	NA	NA	NA	NA	NA	NA
IMP dehydrogenase activity	NA	NA	NA	NA	NA	NA	NA	NA	50 (0.040541)	NA	NA	NA	NA	NA	NA	NA	NA	NA	NA	NA	NA	NA	NA	NA	NA	NA	NA	NA	NA	NA	NA	NA	NA	NA	NA	NA	NA	NA	NA	NA	NA
IRE1-mediated unfolded protein response	NA	NA	NA	NA	NA	NA	NA	NA	NA	NA	NA	NA	NA	NA	NA	NA	NA	NA	NA	NA	NA	NA	NA	NA	NA	NA	NA	NA	NA	NA	NA	NA	NA	NA	NA	NA	NA	NA	NA	NA	9.5 (0.042735)
ITP metabolic process	NA	NA	NA	NA	NA	NA	NA	NA	NA	NA	NA	NA	NA	NA	NA	NA	NA	NA	NA	NA	NA	NA	NA	NA	NA	NA	NA	NA	NA	NA	Inf (0.021739)	NA	NA	NA	NA	NA	NA	NA	NA	NA	NA
L-iditol 2-dehydrogenase activity	NA	NA	NA	NA	NA	NA	NA	NA	NA	NA	NA	NA	NA	NA	NA	NA	NA	NA	NA	NA	NA	NA	NA	NA	NA	NA	NA	16.7 (0.027027)	NA	NA	NA	NA	NA	NA	NA	NA	NA	NA	NA	NA	NA
MAPK cascade	NA	NA	NA	NA	NA	NA	NA	NA	3.4 (0.041486)	NA	NA	NA	NA	NA	NA	NA	NA	NA	NA	NA	NA	NA	NA	NA	NA	NA	NA	NA	NA	NA	NA	NA	NA	NA	NA	NA	NA	NA	NA	NA	NA
MCM core complex	NA	NA	NA	NA	NA	NA	NA	NA	NA	NA	NA	NA	NA	NA	NA	NA	NA	NA	2.3 (0.02928)	NA	NA	NA	NA	NA	NA	NA	NA	NA	NA	NA	NA	NA	NA	NA	NA	NA	NA	NA	NA	NA	NA
MIH complex	NA	NA	NA	NA	NA	NA	NA	NA	NA	NA	NA	NA	NA	NA	NA	100 (0.021978)	NA	NA	NA	NA	NA	NA	NA	NA	NA	NA	NA	NA	NA	NA	NA	NA	NA	NA	NA	NA	NA	NA	NA	NA	NA
Mre11 complex	NA	NA	NA	NA	NA	NA	NA	NA	NA	NA	NA	NA	NA	NA	NA	NA	NA	NA	NA	NA	NA	NA	NA	NA	NA	NA	NA	NA	3 (0.031146)	NA	NA	NA	NA	NA	NA	NA	NA	NA	NA	NA	NA
NAD binding	NA	NA	NA	NA	NA	NA	NA	NA	NA	NA	NA	NA	2.2 (0.001114)	NA	NA	15.4 (0.008051)	4.3 (0.013872)	NA	NA	NA	NA	NA	NA	NA	NA	NA	NA	NA	NA	NA	NA	NA	NA	NA	NA	NA	NA	NA	NA	NA	NA
NAD metabolic process	NA	NA	NA	NA	NA	3.8 (0.024344)	NA	NA	NA	NA	NA	NA	NA	NA	NA	NA	4.5 (0.028708)	NA	NA	NA	NA	NA	NA	NA	NA	22.2 (0.006922)	NA	NA	NA	NA	NA	NA	NA	NA	NA	NA	NA	NA	NA	NA	NA
NAD+ kinase activity	NA	NA	NA	NA	NA	NA	NA	NA	NA	NA	NA	NA	NA	NA	NA	NA	NA	NA	NA	NA	NA	NA	NA	NA	NA	NA	NA	NA	NA	7.4 (0.049691)	NA	NA	NA	NA	NA	NA	NA	NA	NA	NA	NA
NADH metabolic process	NA	NA	NA	NA	NA	NA	NA	NA	NA	NA	NA	NA	NA	NA	NA	NA	5.6 (0.016781)	NA	NA	NA	NA	NA	NA	NA	NA	28.6 (0.004696)	NA	NA	NA	NA	NA	NA	NA	NA	NA	NA	NA	NA	NA	NA	NA
NADP binding	NA	NA	NA	NA	NA	NA	NA	NA	NA	NA	NA	NA	NA	NA	NA	NA	5.2 (0.020341)	NA	NA	NA	NA	NA	NA	NA	NA	NA	NA	NA	NA	NA	NA	NA	NA	NA	NA	NA	NA	NA	NA	NA	NA
NADP metabolic process	NA	NA	NA	NA	NA	NA	NA	NA	NA	NA	NA	NA	NA	NA	NA	NA	4.9 (0.00883)	NA	NA	NA	NA	NA	NA	NA	NA	NA	NA	NA	NA	4.3 (0.01355)	NA	NA	NA	NA	NA	NA	NA	NA	NA	NA	NA
Noc complex	NA	NA	NA	NA	NA	NA	NA	NA	NA	NA	NA	NA	NA	NA	NA	NA	NA	NA	NA	NA	NA	NA	NA	NA	NA	NA	NA	NA	NA	6.1 (0.042831)	NA	NA	NA	NA	NA	NA	NA	NA	NA	NA	NA
NuA4 histone acetyltransferase complex binding	NA	NA	NA	NA	NA	NA	NA	NA	NA	NA	NA	NA	NA	NA	5.6 (0.014778)	NA	NA	NA	NA	NA	NA	NA	NA	NA	NA	NA	NA	NA	NA	NA	NA	NA	NA	NA	NA	NA	NA	NA	NA	NA	NA
O-acyltransferase activity	NA	NA	NA	NA	NA	NA	NA	NA	NA	NA	NA	NA	NA	NA	NA	NA	NA	NA	NA	NA	4.3 (0.009354)	NA	NA	NA	NA	NA	NA	NA	NA	NA	NA	NA	NA	NA	NA	NA	NA	NA	NA	NA	NA
P-type transmembrane transporter activity	NA	NA	NA	NA	NA	NA	NA	NA	NA	NA	NA	NA	NA	NA	NA	NA	NA	NA	NA	NA	NA	NA	NA	NA	NA	NA	4.8 (0.037581)	NA	NA	NA	NA	NA	NA	NA	NA	NA	NA	NA	NA	NA	NA
PcG protein complex	NA	NA	NA	NA	NA	NA	NA	20 (0.026058)	NA	NA	NA	NA	NA	NA	NA	NA	NA	NA	NA	NA	NA	NA	NA	NA	NA	NA	NA	NA	NA	NA	NA	NA	NA	NA	NA	NA	NA	NA	NA	NA	14.3 (0.044093)
Prp19 complex	NA	6.7 (0.01026)	NA	NA	NA	NA	NA	NA	NA	NA	NA	NA	NA	NA	NA	NA	NA	NA	NA	NA	2.2 (0.039631)	NA	NA	NA	NA	NA	NA	NA	NA	NA	NA	NA	NA	12.5 (0.010328)	NA	NA	5.6 (0.00645)	NA	NA	NA	NA
RNA cap binding	NA	NA	NA	NA	NA	NA	NA	NA	NA	NA	NA	NA	NA	NA	NA	NA	8.7 (0.003145)	NA	NA	NA	NA	NA	NA	NA	NA	NA	NA	NA	NA	NA	NA	NA	NA	NA	NA	NA	NA	NA	NA	NA	NA
RNA decapping	NA	NA	NA	NA	NA	NA	NA	NA	NA	NA	NA	NA	NA	NA	NA	NA	3.2 (0.023783)	NA	NA	NA	NA	NA	NA	NA	NA	NA	NA	NA	NA	NA	NA	NA	NA	NA	NA	NA	NA	NA	NA	NA	NA
RNA polymerase I assembly	NA	50 (0.03876)	NA	NA	NA	NA	NA	NA	NA	NA	NA	14.3 (0.015504)	NA	NA	NA	NA	NA	NA	NA	NA	NA	NA	NA	NA	NA	NA	14.3 (0.01938)	16.7 (0.044574)	NA	NA	NA	NA	NA	NA	NA	NA	NA	NA	NA	NA	NA
RNA polymerase II C-terminal domain binding	NA	NA	NA	NA	NA	NA	NA	NA	25 (0.006494)	NA	NA	NA	NA	NA	NA	NA	NA	NA	NA	NA	NA	NA	NA	NA	NA	NA	NA	NA	NA	NA	NA	NA	NA	NA	NA	NA	NA	NA	NA	NA	NA
RNA polymerase II CTD heptapeptide repeat kinase activity	NA	NA	NA	NA	NA	NA	NA	NA	NA	NA	NA	NA	NA	NA	NA	NA	NA	NA	NA	NA	NA	NA	NA	NA	NA	NA	2.4 (0.038462)	NA	NA	NA	NA	NA	NA	NA	NA	NA	NA	NA	NA	NA	NA
RNA polymerase II core complex assembly	NA	50 (0.03876)	NA	NA	NA	NA	NA	NA	NA	NA	NA	14.3 (0.015504)	NA	NA	NA	NA	NA	NA	NA	NA	NA	NA	NA	NA	NA	NA	14.3 (0.01938)	16.7 (0.044574)	NA	NA	NA	NA	NA	NA	NA	NA	NA	NA	NA	NA	NA
RNA polymerase III assembly	NA	NA	NA	NA	NA	NA	NA	NA	NA	NA	NA	7.1 (0.030797)	NA	NA	NA	NA	NA	NA	NA	NA	NA	NA	NA	NA	NA	NA	7.1 (0.038421)	NA	NA	NA	NA	NA	NA	NA	NA	NA	NA	NA	NA	NA	NA
RNA splicing	NA	4.2 (0.03448)	NA	NA	NA	NA	NA	NA	NA	NA	NA	NA	NA	NA	NA	NA	NA	NA	NA	NA	NA	NA	NA	NA	NA	NA	NA	NA	NA	NA	NA	NA	NA	NA	NA	NA	NA	NA	NA	NA	NA
RNA-dependent DNA biosynthetic process	NA	NA	NA	NA	NA	NA	NA	NA	NA	NA	NA	NA	NA	NA	NA	NA	NA	NA	NA	NA	NA	NA	NA	NA	NA	NA	NA	NA	NA	NA	NA	NA	NA	NA	NA	14.3 (0.027625)	NA	NA	NA	NA	NA
RQC complex	NA	NA	NA	NA	NA	NA	NA	NA	NA	6.7 (0.03235)	NA	NA	NA	NA	NA	NA	NA	NA	NA	NA	NA	NA	NA	NA	NA	NA	NA	NA	NA	NA	NA	NA	NA	NA	NA	NA	NA	NA	NA	NA	NA
RecQ family helicase-topoisomerase III complex	NA	NA	NA	NA	NA	NA	NA	NA	NA	NA	NA	NA	NA	NA	NA	NA	NA	NA	NA	NA	NA	NA	NA	NA	NA	NA	4.8 (0.030532)	10.5 (0.002142)	NA	NA	NA	NA	NA	NA	NA	100 (0.022958)	NA	NA	NA	NA	NA
S-methyltransferase activity	NA	NA	NA	NA	NA	NA	NA	NA	NA	NA	NA	NA	NA	NA	NA	NA	6.5 (0.032459)	NA	NA	NA	NA	NA	NA	NA	NA	NA	NA	NA	NA	NA	NA	NA	NA	NA	NA	NA	NA	NA	NA	NA	NA
SUMO ligase complex	NA	NA	20 (0.041074)	NA	NA	NA	NA	NA	NA	NA	NA	NA	NA	NA	NA	NA	NA	NA	NA	NA	6.5 (0.009908)	NA	NA	NA	NA	NA	NA	NA	NA	NA	NA	NA	NA	NA	NA	NA	NA	NA	NA	NA	NA
Set3 complex	NA	NA	NA	NA	NA	NA	NA	NA	NA	NA	NA	NA	NA	NA	NA	NA	NA	NA	NA	NA	NA	NA	NA	NA	NA	NA	NA	NA	NA	6.1 (0.031602)	NA	NA	NA	NA	NA	NA	NA	NA	NA	NA	NA
Sm-like protein family complex	NA	5.2 (0.001338)	NA	NA	NA	NA	NA	NA	NA	NA	NA	NA	NA	NA	NA	NA	NA	NA	NA	NA	NA	NA	NA	NA	NA	NA	NA	NA	NA	NA	NA	NA	NA	NA	NA	NA	2.7 (0.043426)	NA	NA	NA	NA
TRAMP complex	NA	NA	NA	NA	NA	NA	NA	NA	NA	NA	NA	NA	NA	NA	NA	NA	4.3 (0.046414)	NA	NA	NA	NA	NA	NA	NA	NA	NA	NA	NA	NA	NA	NA	NA	NA	NA	NA	NA	NA	NA	NA	NA	NA
U2-type spliceosomal complex	NA	NA	NA	NA	NA	NA	NA	NA	NA	NA	NA	NA	NA	NA	NA	NA	NA	NA	NA	NA	2.7 (0.046571)	NA	NA	NA	NA	NA	NA	NA	NA	NA	NA	NA	NA	NA	NA	NA	5.2 (0.046571)	NA	NA	NA	NA
UDP-alpha-D-glucose:glucosyl-glycogenin alpha-D-glucosyltransferase activity	NA	NA	NA	NA	NA	NA	NA	NA	NA	NA	NA	NA	NA	NA	NA	NA	NA	NA	NA	NA	NA	NA	NA	NA	NA	NA	NA	NA	NA	NA	NA	NA	NA	NA	NA	NA	NA	10 (0.027778)	NA	NA	NA
UDP-glycosyltransferase activity	NA	NA	NA	NA	NA	NA	NA	5.3 (0.032795)	NA	NA	NA	NA	NA	NA	NA	NA	4.9 (0.040458)	NA	NA	NA	NA	NA	NA	NA	NA	27.3 (0.032795)	NA	NA	NA	3.5 (0.005348)	NA	NA	NA	NA	NA	NA	NA	NA	NA	NA	NA
UFD1-NPL4 complex	NA	NA	NA	NA	NA	NA	NA	NA	NA	14.3 (0.018012)	NA	NA	NA	NA	NA	NA	NA	NA	NA	NA	NA	NA	NA	NA	NA	NA	NA	NA	NA	NA	NA	NA	NA	NA	NA	NA	NA	NA	NA	NA	NA
acetolactate synthase complex	NA	NA	NA	NA	NA	NA	NA	NA	NA	NA	NA	NA	NA	NA	2.7 (0.031309)	NA	NA	NA	NA	NA	NA	NA	NA	NA	NA	NA	NA	NA	NA	NA	NA	NA	NA	NA	NA	NA	NA	NA	NA	NA	NA
acetyl-CoA:L-glutamate N-acetyltransferase activity	25 (0.047619)	NA	NA	NA	NA	NA	NA	NA	NA	NA	NA	NA	NA	NA	NA	NA	12.5 (0.047619)	NA	NA	NA	NA	NA	NA	NA	NA	NA	NA	8.3 (0.047619)	NA	NA	NA	NA	NA	NA	NA	NA	NA	NA	NA	NA	NA
acid phosphatase activity	NA	NA	NA	NA	NA	NA	NA	NA	NA	NA	NA	NA	NA	NA	NA	NA	NA	NA	NA	NA	NA	NA	NA	NA	NA	NA	NA	NA	NA	NA	NA	33.3 (0.042254)	NA	NA	NA	NA	NA	NA	NA	NA	NA
actin binding	NA	NA	NA	NA	NA	NA	NA	NA	3.7 (0.048613)	NA	NA	NA	NA	NA	NA	NA	NA	NA	NA	NA	NA	NA	NA	NA	NA	NA	NA	NA	NA	NA	NA	NA	NA	NA	NA	NA	NA	NA	NA	NA	NA
actin lateral binding	NA	NA	NA	NA	NA	NA	NA	NA	NA	NA	NA	NA	NA	NA	NA	NA	NA	NA	NA	NA	NA	NA	NA	NA	NA	NA	NA	NA	NA	15.4 (0.028409)	NA	NA	NA	NA	NA	NA	50 (0.001894)	NA	NA	NA	NA
active ion transmembrane transporter activity	NA	NA	NA	NA	NA	NA	NA	NA	NA	NA	NA	NA	NA	NA	NA	NA	NA	NA	NA	NA	NA	NA	NA	NA	NA	NA	NA	NA	NA	5.2 (0.003074)	NA	NA	NA	NA	NA	NA	NA	NA	NA	NA	NA
active transmembrane transporter activity	NA	NA	NA	NA	NA	NA	NA	NA	NA	NA	NA	NA	NA	NA	NA	NA	NA	NA	NA	NA	NA	NA	NA	NA	NA	NA	NA	NA	NA	3.8 (0.001122)	NA	NA	NA	NA	NA	NA	NA	NA	NA	NA	NA
actomyosin structure organization	NA	NA	NA	NA	NA	NA	NA	NA	NA	NA	NA	NA	NA	NA	NA	NA	NA	NA	NA	NA	NA	NA	NA	NA	NA	NA	NA	NA	NA	NA	NA	NA	NA	NA	NA	NA	4.3 (0.027184)	NA	NA	NA	NA
acyltransferase, acyl groups converted into alkyl on transfer	NA	NA	NA	NA	NA	NA	6.9 (0.032883)	NA	NA	NA	NA	NA	NA	NA	NA	NA	NA	NA	NA	NA	NA	NA	NA	NA	NA	NA	NA	NA	NA	3 (0.032883)	NA	NA	NA	NA	NA	NA	NA	NA	NA	NA	NA
adaptation of signaling pathway	NA	NA	NA	NA	NA	NA	NA	6.7 (0.002257)	NA	NA	NA	NA	NA	NA	NA	NA	NA	NA	NA	NA	NA	NA	NA	NA	NA	NA	NA	NA	NA	2.7 (0.03606)	NA	NA	NA	NA	NA	NA	NA	NA	NA	NA	NA
adenosylmethionine-8-amino-7-oxononanoate transaminase activity	NA	NA	NA	14.3 (0.045455)	14.3 (0.045455)	NA	NA	NA	NA	NA	NA	NA	NA	NA	NA	NA	NA	NA	NA	NA	25 (0.045455)	NA	NA	NA	NA	NA	NA	NA	NA	NA	NA	NA	NA	NA	NA	NA	NA	NA	NA	NA	NA
aerobic respiration	NA	NA	NA	NA	NA	NA	NA	NA	NA	NA	NA	NA	NA	NA	NA	NA	NA	NA	NA	NA	NA	NA	NA	NA	NA	NA	NA	NA	NA	7 (0.042992)	NA	NA	NA	NA	NA	NA	NA	NA	NA	NA	NA
alcohol binding	NA	NA	NA	NA	NA	NA	NA	NA	NA	NA	NA	NA	NA	NA	NA	NA	NA	7.7 (0.02857)	NA	NA	NA	NA	NA	NA	NA	33.3 (0.045395)	NA	NA	NA	NA	NA	NA	NA	NA	NA	NA	NA	NA	NA	NA	NA
alcohol dehydrogenase [NAD(P)+] activity	NA	NA	NA	NA	NA	NA	NA	NA	NA	NA	NA	NA	NA	NA	NA	40 (0.037394)	NA	NA	NA	NA	NA	NA	NA	NA	NA	NA	NA	NA	NA	NA	NA	NA	NA	NA	NA	NA	NA	NA	NA	NA	NA
alkali metal ion binding	NA	NA	NA	NA	NA	NA	NA	NA	NA	NA	NA	NA	NA	NA	NA	100 (0.016517)	25 (0.002686)	NA	NA	NA	NA	NA	NA	NA	NA	NA	NA	NA	NA	NA	NA	NA	NA	NA	NA	NA	NA	NA	NA	NA	NA
alkanesulfonate metabolic process	NA	NA	NA	NA	14.3 (0.021935)	NA	NA	NA	NA	NA	NA	NA	NA	NA	NA	NA	NA	NA	NA	NA	NA	NA	NA	NA	NA	NA	NA	NA	NA	NA	NA	NA	NA	NA	NA	NA	NA	NA	NA	NA	NA
allantoin metabolic process	7.7 (0.04696)	NA	NA	NA	NA	NA	NA	NA	NA	NA	NA	NA	NA	NA	NA	NA	NA	NA	NA	NA	NA	3.8 (0.04696)	NA	NA	NA	NA	NA	NA	NA	NA	NA	NA	NA	NA	NA	NA	NA	NA	NA	NA	NA
alpha,alpha-trehalose-phosphate synthase complex (UDP-forming)	NA	NA	NA	NA	NA	NA	NA	NA	NA	NA	NA	NA	NA	NA	NA	NA	18.8 (5.1e-05)	NA	NA	NA	NA	NA	NA	NA	NA	50 (0.031309)	NA	NA	NA	11.1 (0.001367)	NA	NA	NA	NA	NA	NA	NA	NA	NA	NA	14.3 (0.005064)
alpha-amino acid metabolic process	NA	NA	NA	NA	NA	NA	NA	2.1 (0.044092)	NA	NA	NA	NA	NA	NA	NA	NA	NA	NA	NA	NA	NA	NA	NA	NA	NA	NA	NA	NA	NA	NA	NA	NA	NA	NA	NA	NA	NA	NA	NA	NA	NA
amide binding	NA	NA	NA	NA	NA	NA	NA	NA	NA	NA	NA	NA	NA	NA	NA	9.7 (0.01921)	4.1 (0.000121)	NA	NA	NA	NA	NA	NA	NA	NA	NA	NA	NA	NA	NA	NA	NA	NA	NA	NA	NA	NA	NA	NA	NA	NA
amide transport	NA	NA	NA	NA	NA	NA	NA	NA	NA	NA	NA	NA	NA	NA	NA	NA	NA	NA	NA	NA	NA	NA	NA	NA	NA	NA	NA	NA	NA	NA	NA	NA	NA	NA	NA	14.3 (0.021291)	NA	NA	NA	NA	NA
amine metabolic process	NA	NA	NA	NA	NA	3.6 (0.001487)	2.9 (0.023195)	NA	NA	2.2 (0.048247)	NA	NA	NA	NA	NA	NA	NA	NA	NA	NA	NA	NA	3.3 (0.028191)	NA	50 (0.035439)	NA	NA	NA	NA	NA	NA	NA	NA	NA	NA	12.5 (0.024707)	4.2 (0.023195)	NA	NA	NA	NA
amino acid catabolic process via Ehrlich pathway	NA	NA	NA	NA	NA	NA	NA	NA	NA	NA	NA	NA	NA	NA	NA	NA	NA	NA	NA	NA	4.8 (0.043137)	NA	NA	NA	NA	NA	NA	NA	NA	NA	NA	NA	NA	NA	NA	NA	NA	NA	NA	NA	NA
amino acid kinase activity	NA	NA	NA	NA	NA	NA	NA	NA	NA	NA	NA	NA	NA	NA	NA	NA	NA	NA	NA	NA	NA	NA	12.5 (0.034362)	NA	NA	NA	NA	NA	NA	NA	NA	NA	NA	NA	NA	NA	NA	NA	NA	NA	NA
amino sugar metabolic process	NA	NA	NA	NA	NA	NA	NA	NA	4.7 (0.047327)	NA	NA	NA	NA	NA	NA	NA	NA	NA	NA	NA	3 (0.026831)	NA	NA	NA	NA	NA	NA	NA	NA	NA	NA	NA	NA	NA	NA	NA	NA	NA	NA	NA	NA
amino-acid betaine metabolic process	NA	NA	NA	NA	NA	NA	18.2 (0.024769)	NA	NA	NA	NA	NA	5.3 (0.024769)	NA	NA	NA	NA	NA	NA	NA	13.3 (0.024769)	NA	NA	NA	NA	NA	NA	NA	NA	NA	NA	NA	NA	NA	NA	NA	NA	NA	NA	NA	NA
aminoglycan metabolic process	NA	NA	NA	NA	NA	2.9 (0.020397)	NA	NA	5.6 (0.009897)	NA	NA	NA	NA	NA	NA	NA	NA	NA	NA	NA	3.5 (0.002738)	NA	NA	NA	NA	NA	NA	NA	NA	NA	NA	NA	NA	NA	NA	NA	NA	NA	NA	NA	NA
anaerobic respiration	NA	NA	NA	NA	NA	NA	NA	NA	NA	NA	NA	NA	NA	NA	NA	NA	NA	20 (0.041022)	NA	NA	NA	NA	NA	NA	NA	NA	NA	NA	NA	NA	NA	NA	NA	NA	NA	NA	NA	NA	NA	NA	NA
anaphase-promoting complex binding	NA	NA	NA	4.5 (0.014778)	4.8 (0.043897)	11.1 (0.02941)	NA	NA	NA	NA	NA	NA	NA	NA	NA	NA	NA	NA	NA	NA	NA	7.7 (0.014778)	NA	NA	NA	NA	NA	NA	NA	NA	NA	NA	NA	NA	NA	NA	NA	NA	NA	NA	NA
anaphase-promoting complex-dependent catabolic process	NA	NA	NA	NA	2.1 (0.008253)	NA	NA	NA	NA	NA	NA	NA	NA	NA	NA	NA	NA	NA	NA	NA	3.7 (0.044282)	NA	NA	NA	NA	NA	NA	NA	NA	NA	NA	NA	NA	NA	NA	NA	NA	NA	NA	NA	NA
anatomical structure development	NA	NA	NA	NA	NA	NA	3.3 (0.0333)	3.3 (0.04157)	NA	NA	NA	NA	NA	NA	NA	NA	NA	NA	NA	NA	2.9 (0.016982)	NA	NA	NA	NA	NA	NA	NA	NA	NA	NA	NA	NA	NA	NA	NA	NA	NA	NA	NA	NA
anatomical structure formation involved in morphogenesis	NA	NA	NA	NA	NA	3.4 (0.032633)	4.2 (0.019448)	NA	NA	NA	NA	NA	NA	NA	NA	NA	NA	NA	NA	NA	NA	NA	NA	NA	NA	NA	NA	2.4 (0.006746)	NA	NA	NA	NA	NA	NA	NA	NA	NA	NA	NA	NA	NA
anchored component of membrane	NA	NA	NA	NA	NA	NA	3.5 (0.008225)	NA	3.3 (0.030375)	NA	NA	NA	2.8 (0)	NA	NA	11.1 (0.000925)	4.6 (0.001009)	3.9 (0.008225)	NA	10.3 (0.006792)	3.1 (0.002875)	NA	NA	NA	NA	NA	NA	NA	NA	NA	NA	7.4 (0.039349)	NA	NA	NA	NA	NA	NA	NA	NA	5 (0.00027)
annealing activity	NA	NA	NA	NA	NA	8.3 (0.049741)	NA	NA	NA	NA	NA	NA	NA	NA	NA	NA	NA	NA	NA	NA	NA	NA	NA	NA	NA	NA	NA	NA	NA	NA	NA	NA	NA	NA	NA	NA	NA	NA	NA	NA	NA
antisense RNA metabolic process	NA	NA	NA	NA	NA	NA	3.8 (0.039042)	NA	NA	NA	NA	NA	NA	NA	NA	NA	2.9 (0.019694)	NA	NA	NA	NA	NA	NA	NA	NA	NA	NA	NA	NA	NA	NA	NA	NA	NA	NA	NA	NA	NA	NA	NA	NA
antisense transcription	NA	NA	NA	NA	NA	NA	NA	NA	NA	NA	2.2 (0)	NA	NA	NA	2.1 (0)	NA	NA	NA	NA	NA	NA	NA	NA	NA	NA	NA	NA	NA	2.2 (0)	NA	NA	NA	NA	NA	2.3 (0)	NA	NA	2.1 (0)	2.1 (0)	NA	NA
arginine metabolic process	16.7 (0.004724)	NA	NA	NA	NA	NA	NA	7.9 (0.018571)	NA	NA	NA	NA	NA	NA	NA	NA	7.4 (0.017953)	NA	NA	NA	NA	NA	NA	NA	NA	NA	NA	NA	NA	NA	NA	NA	NA	NA	NA	NA	NA	NA	NA	NA	NA
argininosuccinate synthase activity	NA	NA	NA	NA	NA	NA	NA	NA	NA	NA	NA	14.3 (0.027027)	NA	NA	NA	NA	NA	NA	NA	NA	NA	NA	NA	NA	NA	NA	14.3 (0.027027)	16.7 (0.027027)	NA	NA	Inf (0.027027)	NA	33.3 (0.027027)	NA	NA	Inf (0.027027)	NA	NA	NA	NA	NA
aromatic amino acid family metabolic process	NA	NA	NA	2.6 (0.003076)	2.2 (0.002897)	4.9 (0.002897)	NA	4.2 (0.043706)	NA	NA	NA	NA	NA	NA	NA	NA	NA	NA	NA	NA	NA	2.7 (0.013099)	7 (0.043706)	NA	NA	NA	NA	NA	NA	NA	NA	NA	NA	NA	NA	NA	NA	NA	NA	NA	NA
arsenate ion transmembrane transport	NA	NA	NA	NA	NA	NA	NA	NA	NA	20 (0.041881)	NA	NA	NA	NA	5.4 (0.010078)	NA	25 (0.006271)	NA	NA	200 (0.000224)	25 (0.00224)	NA	NA	NA	NA	100 (0.041881)	NA	NA	NA	NA	NA	NA	NA	NA	NA	NA	NA	NA	NA	NA	NA
aspartic-type peptidase activity	NA	NA	NA	2.7 (0.009099)	2.9 (0.009099)	NA	6.9 (0.041298)	11.1 (0.007115)	NA	NA	NA	NA	3.2 (0.014289)	NA	NA	NA	NA	NA	NA	NA	NA	4.7 (0.003133)	NA	NA	NA	NA	NA	NA	NA	6 (0.047744)	NA	NA	NA	NA	NA	NA	NA	NA	NA	NA	13.9 (0.001021)
autophagosome	NA	NA	NA	NA	NA	NA	NA	NA	NA	NA	NA	NA	NA	NA	NA	NA	NA	NA	NA	NA	NA	NA	NA	NA	NA	NA	NA	9.7 (0.000292)	NA	9.1 (0.003235)	NA	NA	NA	NA	NA	NA	NA	NA	NA	NA	NA
basal transcription machinery binding	NA	NA	NA	NA	NA	NA	NA	NA	5.5 (0.038577)	NA	NA	NA	NA	NA	NA	NA	NA	NA	NA	NA	NA	NA	NA	NA	NA	NA	NA	NA	NA	NA	NA	NA	NA	NA	NA	NA	NA	NA	NA	NA	NA
base conversion or substitution editing	NA	NA	NA	NA	NA	NA	NA	NA	NA	NA	NA	NA	NA	NA	NA	NA	NA	NA	NA	NA	NA	NA	NA	NA	NA	NA	NA	NA	NA	NA	NA	NA	14.3 (0.018018)	NA	NA	NA	NA	NA	NA	NA	NA
benzene-containing compound metabolic process	8.3 (0.004056)	NA	NA	3.7 (0.000892)	4 (0.000892)	8.8 (0.000488)	NA	6.7 (0.036864)	NA	NA	NA	NA	NA	NA	NA	NA	4.7 (0.029057)	NA	NA	NA	NA	NA	11.1 (0.005136)	33.3 (0.018623)	NA	16.7 (0.048961)	NA	NA	NA	NA	100 (0.018623)	NA	NA	NA	NA	NA	NA	NA	NA	NA	NA
biological adhesion	NA	NA	NA	NA	NA	NA	NA	9.6 (0.000278)	NA	NA	NA	NA	NA	NA	NA	NA	NA	NA	NA	NA	NA	NA	NA	NA	NA	NA	NA	NA	NA	NA	NA	NA	NA	NA	NA	NA	NA	NA	NA	NA	NA
biological phase	NA	NA	NA	NA	NA	NA	NA	NA	NA	NA	NA	NA	NA	NA	NA	NA	NA	NA	NA	NA	NA	NA	NA	NA	NA	NA	NA	NA	NA	2.5 (0.029906)	NA	NA	NA	NA	NA	NA	NA	NA	NA	10 (0.037489)	NA
biological process involved in intraspecies interaction between organisms	NA	NA	NA	NA	NA	NA	NA	6.5 (0.01654)	NA	NA	NA	NA	NA	NA	NA	NA	NA	NA	NA	NA	NA	NA	NA	NA	NA	NA	NA	NA	NA	NA	NA	NA	NA	NA	NA	NA	NA	NA	NA	NA	NA
biosynthetic process	NA	NA	NA	NA	NA	NA	NA	NA	NA	NA	NA	NA	NA	NA	NA	NA	NA	NA	NA	NA	NA	NA	NA	NA	NA	NA	NA	NA	NA	NA	NA	NA	NA	NA	NA	NA	NA	NA	NA	2.8 (0.033149)	NA
branched-chain amino acid metabolic process	NA	NA	NA	2.2 (0.011379)	NA	3.9 (0.033961)	NA	NA	6.6 (0.006858)	NA	NA	NA	NA	NA	NA	NA	NA	NA	NA	NA	NA	NA	NA	NA	NA	NA	NA	NA	NA	NA	NA	NA	NA	NA	NA	NA	NA	NA	NA	NA	NA
branched-chain-2-oxoacid decarboxylase activity	NA	NA	NA	6.9 (0.023715)	NA	NA	NA	NA	NA	NA	6.7 (0.023715)	NA	NA	NA	2.7 (0.023715)	NA	NA	NA	NA	NA	NA	11.8 (0.023715)	NA	NA	NA	NA	NA	NA	NA	NA	NA	NA	NA	NA	NA	NA	NA	NA	NA	NA	NA
brassicasterol glucosyltransferase activity	NA	NA	NA	NA	NA	NA	NA	NA	NA	NA	NA	NA	NA	NA	NA	NA	NA	NA	NA	NA	NA	NA	NA	NA	NA	NA	NA	16.7 (0.013889)	NA	NA	NA	NA	NA	NA	NA	NA	NA	NA	NA	NA	NA
budding cell isotropic bud growth	NA	NA	NA	NA	NA	NA	NA	NA	NA	NA	NA	NA	NA	NA	NA	NA	NA	NA	NA	NA	NA	NA	NA	NA	NA	NA	NA	NA	NA	NA	NA	NA	NA	NA	NA	NA	25 (0.03693)	NA	NA	NA	NA
calmodulin binding	NA	NA	NA	NA	NA	NA	NA	NA	7.8 (0.011265)	NA	NA	NA	NA	NA	NA	NA	NA	3.7 (0.017399)	NA	NA	NA	NA	NA	NA	NA	18.2 (0.011655)	NA	NA	NA	NA	NA	NA	NA	NA	NA	NA	NA	NA	NA	NA	NA
calmodulin-dependent protein kinase activity	NA	NA	NA	NA	NA	NA	NA	NA	NA	NA	NA	NA	NA	NA	NA	NA	NA	NA	25 (0.032051)	NA	NA	NA	NA	NA	NA	NA	NA	NA	NA	NA	NA	NA	NA	NA	NA	50 (0.032051)	NA	NA	NA	NA	NA
carbamoyl-phosphate synthase complex	50 (0.01087)	NA	NA	NA	NA	NA	NA	33.3 (0.036957)	NA	NA	NA	NA	NA	NA	5.6 (0.036957)	NA	25 (0.036957)	NA	NA	NA	NA	NA	NA	NA	NA	NA	NA	NA	NA	NA	NA	NA	NA	NA	NA	NA	NA	NA	NA	NA	NA
carbohydrate binding	NA	NA	NA	NA	NA	NA	3.8 (0.01055)	NA	NA	NA	NA	NA	NA	NA	NA	NA	4.6 (0.002442)	NA	NA	NA	NA	NA	NA	NA	NA	NA	NA	2.9 (0.010239)	NA	3.2 (0.044332)	NA	NA	NA	NA	NA	NA	NA	NA	NA	NA	NA
carbohydrate biosynthetic process	NA	NA	NA	NA	NA	NA	4.4 (0.04443)	NA	NA	NA	NA	NA	NA	NA	NA	NA	5 (0.044063)	NA	NA	NA	NA	NA	NA	NA	NA	NA	NA	NA	NA	NA	NA	NA	NA	NA	NA	NA	NA	NA	NA	NA	5.1 (0.000856)
carbohydrate catabolic process	NA	NA	NA	NA	NA	NA	NA	NA	NA	NA	NA	NA	NA	NA	NA	NA	6.5 (0.008704)	NA	NA	NA	NA	NA	NA	NA	NA	NA	NA	NA	NA	NA	NA	NA	NA	NA	NA	NA	NA	NA	NA	NA	NA
carbohydrate derivative metabolic process	NA	NA	NA	NA	NA	NA	NA	NA	NA	NA	NA	NA	NA	NA	NA	NA	NA	NA	NA	NA	NA	NA	NA	NA	NA	NA	NA	NA	NA	2.1 (0.004166)	NA	NA	NA	NA	NA	NA	NA	NA	NA	NA	NA
carbohydrate derivative transport	NA	NA	NA	NA	NA	NA	NA	NA	NA	NA	NA	NA	NA	NA	NA	NA	NA	2.7 (0.010695)	NA	NA	NA	NA	NA	NA	NA	NA	NA	NA	NA	NA	NA	NA	NA	NA	NA	NA	NA	NA	NA	NA	NA
carbohydrate metabolic process	NA	NA	NA	NA	NA	NA	3.1 (0)	2.3 (0.002368)	NA	NA	NA	NA	NA	NA	NA	4 (0.035606)	3.7 (0)	NA	NA	NA	2.3 (5e-06)	NA	NA	4.3 (0.015927)	NA	6.8 (3.9e-05)	NA	NA	NA	3 (1e-06)	NA	NA	NA	NA	NA	NA	NA	NA	NA	NA	3.7 (0)
carbohydrate phosphatase activity	NA	NA	NA	NA	NA	NA	NA	NA	NA	NA	NA	NA	NA	NA	NA	NA	7 (0.015844)	NA	NA	NA	NA	NA	NA	NA	NA	NA	NA	NA	NA	NA	NA	NA	NA	NA	NA	NA	NA	NA	NA	NA	7.7 (0.040809)
carbohydrate transmembrane transport	NA	NA	NA	NA	NA	NA	NA	NA	NA	NA	NA	NA	NA	NA	NA	NA	NA	NA	NA	NA	NA	NA	NA	NA	NA	NA	NA	NA	NA	6.7 (0.024318)	NA	NA	NA	NA	NA	NA	NA	NA	NA	NA	NA
carbohydrate transport	NA	NA	NA	NA	NA	NA	NA	4.8 (0.006242)	NA	NA	NA	NA	NA	NA	NA	NA	3.3 (0.021396)	NA	NA	NA	3.3 (0.002304)	2.3 (0.002057)	NA	NA	NA	NA	NA	NA	NA	4.3 (0.00276)	NA	NA	NA	NA	NA	NA	NA	NA	NA	NA	NA
carbon-carbon lyase activity	NA	NA	NA	NA	NA	NA	NA	NA	NA	NA	NA	NA	NA	NA	NA	NA	NA	NA	NA	NA	NA	NA	NA	NA	NA	NA	NA	NA	NA	NA	NA	NA	NA	NA	NA	NA	NA	NA	NA	42.9 (0.021935)	NA
carbon-nitrogen lyase activity	15.8 (0.000994)	NA	NA	NA	NA	NA	NA	12.5 (0.007774)	NA	NA	NA	NA	NA	NA	NA	NA	NA	NA	NA	NA	NA	NA	NA	NA	NA	NA	NA	NA	NA	NA	NA	NA	NA	NA	NA	NA	NA	NA	NA	NA	NA
carboxyl- or carbamoyltransferase activity	22.2 (0.001019)	NA	NA	NA	NA	NA	NA	NA	NA	NA	NA	3.6 (0.036697)	NA	NA	2.7 (0.00302)	NA	12.5 (0.014536)	NA	NA	NA	NA	NA	NA	NA	NA	NA	NA	NA	NA	NA	NA	NA	NA	NA	NA	NA	NA	NA	NA	NA	NA
carboxylic acid binding	NA	NA	NA	NA	NA	NA	6.9 (0.008111)	NA	NA	NA	NA	NA	NA	NA	NA	60 (2.5e-05)	NA	NA	NA	NA	NA	NA	NA	NA	NA	60 (6.9e-05)	NA	NA	NA	NA	NA	NA	NA	NA	NA	NA	NA	NA	NA	NA	NA
carnitine O-acyltransferase activity	NA	NA	NA	NA	NA	NA	22.2 (0.01087)	NA	NA	NA	NA	NA	NA	NA	NA	NA	NA	NA	NA	NA	NA	NA	NA	NA	NA	NA	NA	NA	NA	NA	NA	NA	NA	NA	NA	NA	NA	NA	NA	NA	NA
carnosine N-methyltransferase activity	NA	NA	NA	NA	NA	NA	NA	NA	NA	NA	NA	NA	NA	NA	NA	NA	NA	NA	NA	NA	NA	NA	NA	NA	NA	NA	NA	16.7 (0.036585)	NA	NA	Inf (0.012195)	NA	NA	NA	NA	NA	NA	NA	NA	NA	25 (0.012195)
catabolic process	NA	NA	NA	NA	NA	NA	NA	NA	NA	NA	NA	NA	NA	NA	NA	2.4 (0.040277)	NA	NA	NA	NA	NA	NA	NA	2.9 (0.000148)	NA	NA	NA	NA	NA	NA	NA	NA	NA	NA	NA	NA	NA	NA	NA	NA	NA
catalytic activity	NA	NA	NA	NA	NA	NA	NA	NA	NA	NA	NA	NA	NA	NA	NA	NA	NA	NA	NA	NA	NA	NA	NA	NA	NA	NA	NA	NA	NA	NA	2.7 (0.043959)	NA	NA	NA	NA	NA	NA	NA	NA	NA	NA
cation transport	NA	NA	NA	NA	NA	NA	NA	2.3 (0.043745)	NA	NA	NA	NA	NA	NA	NA	NA	NA	NA	NA	NA	NA	NA	NA	NA	NA	NA	NA	NA	NA	3.9 (0.000131)	NA	NA	NA	NA	NA	NA	NA	NA	NA	NA	NA
cell adhesion molecule binding	NA	NA	NA	NA	NA	NA	NA	18.2 (0.007105)	NA	NA	NA	NA	NA	NA	NA	NA	NA	NA	NA	NA	NA	NA	NA	NA	NA	NA	NA	NA	NA	NA	NA	NA	NA	NA	NA	NA	NA	NA	NA	NA	NA
cell death	NA	NA	NA	NA	NA	NA	NA	NA	NA	NA	NA	NA	NA	NA	NA	NA	NA	NA	NA	NA	NA	NA	NA	NA	NA	NA	NA	NA	NA	2.9 (0.043318)	NA	NA	NA	NA	NA	NA	NA	NA	NA	NA	NA
cell development	4.5 (0.024929)	NA	NA	NA	NA	NA	NA	NA	NA	NA	NA	NA	NA	NA	NA	NA	NA	NA	NA	NA	5.1 (0.013511)	NA	NA	NA	NA	NA	NA	NA	NA	NA	NA	NA	NA	NA	NA	NA	NA	NA	NA	NA	NA
cell projection membrane	NA	NA	NA	NA	NA	NA	NA	NA	NA	NA	NA	NA	NA	NA	NA	100 (0.048381)	NA	NA	NA	NA	NA	NA	NA	NA	NA	NA	NA	NA	NA	NA	NA	NA	NA	NA	NA	NA	NA	NA	NA	NA	NA
cell septum	NA	NA	NA	NA	NA	NA	NA	NA	7.4 (0.049944)	NA	NA	NA	NA	NA	NA	NA	NA	NA	NA	NA	NA	NA	NA	NA	NA	NA	NA	NA	NA	NA	NA	NA	NA	NA	NA	NA	NA	NA	NA	NA	NA
cell wall organization or biogenesis	NA	NA	NA	NA	NA	NA	2.4 (1.5e-05)	2.5 (0.002209)	NA	NA	NA	NA	NA	NA	NA	NA	2.1 (0.003137)	NA	2.3 (0.005843)	NA	2.3 (5.7e-05)	NA	NA	NA	NA	NA	NA	NA	NA	NA	NA	NA	NA	NA	NA	NA	NA	NA	NA	NA	2.9 (4e-05)
cellular birth scar	NA	NA	NA	NA	NA	NA	NA	NA	NA	NA	NA	NA	NA	NA	NA	NA	NA	NA	NA	NA	NA	NA	NA	NA	NA	100 (0.046238)	NA	NA	NA	NA	NA	NA	NA	NA	NA	NA	NA	NA	NA	NA	NA
cellular component biogenesis	NA	NA	NA	NA	NA	NA	NA	NA	NA	NA	NA	NA	NA	NA	NA	NA	NA	NA	NA	NA	NA	NA	NA	NA	NA	NA	NA	NA	NA	NA	NA	NA	NA	2.2 (0.031279)	NA	NA	NA	NA	NA	NA	NA
cellular component macromolecule biosynthetic process	NA	NA	NA	NA	NA	NA	2.3 (0.011227)	NA	NA	NA	NA	NA	NA	NA	NA	NA	NA	NA	NA	NA	NA	NA	NA	NA	NA	NA	NA	NA	NA	NA	NA	NA	NA	NA	NA	NA	NA	NA	NA	NA	NA
cellular component morphogenesis	NA	NA	NA	NA	NA	NA	7.2 (0.027625)	NA	NA	NA	NA	NA	NA	NA	NA	NA	NA	NA	NA	NA	6.4 (0.007945)	NA	NA	NA	NA	NA	NA	NA	NA	NA	NA	NA	NA	NA	NA	NA	NA	NA	NA	NA	NA
cellular developmental process	NA	NA	NA	NA	NA	2.7 (0.047509)	3.3 (0.030128)	NA	NA	NA	NA	NA	NA	NA	NA	NA	NA	NA	NA	NA	NA	NA	NA	NA	NA	NA	NA	2.1 (0.007435)	NA	NA	NA	NA	NA	NA	NA	NA	NA	NA	NA	NA	NA
cellular lipid biosynthetic process	NA	NA	NA	NA	NA	NA	NA	NA	NA	NA	NA	NA	NA	NA	NA	NA	5.4 (0.00238)	NA	NA	NA	NA	NA	NA	NA	NA	NA	NA	NA	NA	NA	NA	NA	NA	NA	NA	NA	NA	NA	NA	NA	NA
cellular modified amino acid metabolic process	2.3 (0.025798)	NA	NA	NA	NA	NA	2.3 (0.017865)	NA	NA	NA	NA	NA	NA	NA	NA	NA	3 (0.008801)	NA	NA	NA	NA	NA	NA	NA	NA	NA	NA	NA	NA	NA	25 (0.013265)	NA	NA	NA	NA	NA	NA	NA	NA	16.7 (0.02997)	2.8 (0.025558)
cellular response to environmental stimulus	NA	5 (0.010558)	NA	NA	NA	NA	NA	NA	NA	NA	NA	NA	NA	3.5 (0.008728)	NA	NA	NA	NA	NA	NA	NA	NA	NA	NA	NA	NA	NA	NA	NA	NA	NA	NA	NA	7.4 (0.043643)	NA	NA	NA	NA	NA	NA	3.3 (0.033612)
cellular response to phosphate starvation	NA	NA	NA	NA	NA	NA	NA	NA	20 (0.007974)	NA	NA	NA	NA	NA	NA	NA	NA	20 (0.007974)	NA	NA	NA	NA	NA	NA	NA	NA	NA	NA	NA	NA	NA	NA	NA	NA	NA	NA	NA	NA	NA	NA	NA
central plaque of spindle pole body	NA	NA	NA	NA	NA	NA	NA	NA	NA	NA	NA	NA	NA	NA	NA	NA	NA	NA	NA	NA	NA	NA	NA	NA	NA	NA	NA	NA	NA	7.5 (0.022185)	NA	NA	NA	NA	NA	NA	NA	NA	NA	NA	NA
centromere localization	NA	NA	NA	NA	NA	NA	NA	NA	NA	NA	NA	NA	NA	NA	NA	50 (0.043478)	NA	NA	NA	NA	NA	NA	NA	NA	NA	NA	NA	NA	NA	NA	NA	NA	NA	NA	NA	NA	NA	NA	NA	NA	NA
chaperone binding	NA	NA	NA	NA	NA	NA	NA	NA	6.2 (0.023937)	NA	NA	NA	NA	NA	NA	NA	NA	NA	NA	NA	NA	NA	NA	NA	NA	NA	NA	NA	NA	NA	NA	NA	NA	NA	NA	NA	NA	NA	NA	NA	NA
chaperone complex	NA	NA	NA	NA	NA	NA	NA	NA	10.8 (0.001518)	NA	NA	NA	NA	NA	NA	NA	NA	7.7 (5.3e-05)	NA	NA	NA	NA	NA	NA	NA	37.5 (3.9e-05)	NA	NA	NA	NA	NA	12.5 (0.014837)	NA	NA	NA	NA	NA	NA	NA	NA	NA
chitin binding	16.7 (0.016438)	NA	NA	4.5 (0.040756)	4.8 (0.048772)	11.1 (0.028648)	11.1 (0.028648)	NA	NA	NA	NA	NA	NA	NA	NA	NA	NA	NA	NA	NA	NA	NA	NA	NA	NA	NA	4.8 (0.048772)	NA	NA	NA	NA	NA	10 (0.008242)	NA	NA	NA	NA	6.7 (0.032695)	2.9 (0.044769)	NA	NA
chitosome	NA	NA	NA	NA	NA	NA	NA	20 (0.048944)	40 (0.000902)	NA	NA	NA	NA	NA	NA	NA	NA	NA	NA	NA	NA	NA	NA	NA	NA	NA	NA	NA	NA	NA	NA	NA	NA	NA	NA	NA	NA	NA	NA	NA	NA
cholesterol alpha-glucosyltransferase activity	NA	NA	NA	NA	NA	NA	NA	NA	NA	NA	NA	NA	NA	NA	NA	NA	NA	NA	NA	NA	NA	NA	NA	NA	NA	NA	NA	16.7 (0.013889)	NA	NA	NA	NA	NA	NA	NA	NA	NA	NA	NA	NA	NA
chromatin binding	NA	NA	NA	NA	NA	NA	NA	NA	2.9 (0.033692)	NA	NA	NA	NA	NA	NA	NA	NA	NA	NA	NA	NA	NA	NA	NA	NA	NA	NA	NA	NA	NA	NA	NA	NA	NA	NA	NA	NA	NA	NA	NA	NA
chromatin silencing complex	NA	NA	NA	NA	2.4 (0.046414)	NA	NA	NA	NA	NA	NA	NA	NA	NA	NA	NA	NA	NA	NA	NA	NA	NA	NA	NA	NA	NA	NA	NA	NA	NA	NA	NA	NA	NA	NA	NA	NA	NA	NA	NA	NA
chromosome localization	NA	NA	NA	NA	NA	NA	NA	NA	NA	NA	NA	NA	NA	NA	NA	NA	NA	NA	NA	NA	2.2 (0.041033)	NA	NA	NA	NA	NA	NA	2.2 (0.042751)	NA	NA	NA	NA	NA	NA	NA	NA	NA	NA	NA	NA	NA
chromosome organization involved in meiotic cell cycle	NA	NA	NA	NA	2.5 (0.002432)	3.7 (0.006374)	NA	NA	NA	NA	NA	NA	NA	NA	NA	NA	NA	NA	NA	NA	NA	2.7 (0.006374)	NA	NA	NA	NA	NA	NA	NA	3.8 (0.004081)	NA	NA	NA	NA	NA	NA	4.3 (0.023305)	NA	NA	NA	NA
chromosome, telomeric repeat region	NA	NA	NA	NA	NA	NA	NA	NA	13.3 (0.030163)	NA	NA	NA	NA	NA	NA	NA	NA	NA	NA	NA	NA	NA	NA	NA	NA	NA	NA	NA	NA	NA	NA	NA	NA	NA	NA	NA	NA	NA	NA	NA	NA
citrulline metabolic process	33.3 (0.01078)	NA	NA	NA	NA	NA	NA	NA	NA	NA	NA	NA	NA	NA	3.6 (0.008662)	NA	16.7 (0.039309)	NA	NA	NA	NA	NA	NA	NA	NA	NA	NA	NA	NA	NA	NA	NA	NA	NA	NA	NA	NA	NA	NA	NA	NA
clathrin coat assembly	NA	NA	NA	NA	NA	NA	NA	NA	NA	NA	NA	NA	NA	NA	NA	NA	6.2 (0.030738)	NA	NA	NA	NA	NA	NA	NA	NA	NA	NA	NA	NA	NA	NA	NA	NA	NA	NA	NA	NA	NA	NA	NA	NA
cobalt ion binding	50 (0.014423)	NA	NA	14.3 (0.038462)	14.3 (0.033654)	33.3 (0.024038)	NA	NA	NA	NA	NA	NA	NA	NA	NA	NA	NA	NA	NA	NA	NA	25 (0.004808)	NA	NA	NA	NA	NA	NA	NA	NA	NA	NA	NA	NA	NA	NA	NA	NA	NA	NA	NA
cohesin complex	NA	NA	NA	NA	NA	NA	NA	NA	NA	NA	NA	NA	NA	NA	NA	NA	NA	NA	NA	NA	NA	NA	NA	NA	NA	NA	NA	NA	NA	12.1 (0.001003)	NA	NA	NA	NA	NA	NA	NA	NA	NA	NA	NA
cohesin loading activity	NA	NA	NA	NA	NA	NA	NA	NA	NA	NA	NA	NA	NA	NA	NA	NA	NA	NA	NA	NA	NA	NA	NA	NA	NA	NA	NA	NA	NA	14.3 (0.046875)	NA	NA	NA	NA	NA	NA	NA	NA	NA	NA	NA
condensed chromosome	NA	NA	4.2 (0.005604)	NA	NA	NA	NA	NA	NA	NA	NA	NA	NA	NA	NA	NA	NA	NA	NA	NA	NA	NA	NA	NA	NA	NA	NA	NA	NA	2.2 (0.022598)	NA	NA	NA	NA	NA	NA	NA	NA	NA	NA	NA
contractile ring	NA	NA	NA	NA	NA	NA	NA	NA	NA	NA	NA	NA	NA	NA	NA	25 (0.006597)	NA	NA	NA	NA	NA	NA	NA	NA	NA	NA	NA	NA	NA	NA	NA	NA	NA	NA	NA	NA	7.1 (0.039204)	NA	NA	NA	NA
copper ion binding	NA	6.7 (0.020217)	NA	NA	NA	NA	NA	NA	NA	4.5 (0.020217)	NA	NA	NA	NA	NA	NA	NA	NA	NA	NA	NA	NA	NA	NA	NA	NA	2.4 (0.00932)	NA	NA	3.3 (0.029486)	NA	NA	NA	NA	NA	NA	NA	NA	NA	NA	NA
copper ion transport	NA	NA	NA	3.2 (0.010317)	3.4 (0.010317)	NA	NA	NA	NA	NA	NA	NA	NA	NA	NA	NA	NA	NA	NA	NA	NA	NA	NA	NA	NA	NA	NA	NA	NA	NA	NA	NA	NA	NA	NA	NA	NA	NA	NA	NA	NA
cortical cytoskeleton organization	NA	NA	NA	NA	NA	NA	NA	NA	NA	NA	NA	NA	NA	NA	NA	11.5 (0.041276)	NA	NA	NA	NA	NA	NA	NA	NA	NA	NA	NA	NA	NA	NA	NA	NA	NA	NA	NA	NA	NA	NA	NA	NA	NA
cristae formation	NA	NA	NA	NA	NA	NA	NA	NA	NA	NA	NA	NA	NA	NA	NA	NA	NA	NA	NA	NA	NA	NA	NA	NA	NA	NA	NA	NA	NA	8.3 (0.034325)	NA	NA	NA	NA	NA	NA	NA	NA	NA	NA	NA
cupric ion binding	NA	NA	NA	NA	NA	NA	NA	NA	NA	NA	NA	NA	10.5 (0.019608)	NA	NA	NA	NA	NA	NA	NA	25 (0.019608)	NA	NA	NA	NA	NA	NA	NA	NA	NA	NA	NA	NA	NA	NA	NA	NA	NA	8.3 (0.006536)	NA	NA
cyclin binding	NA	NA	NA	NA	NA	NA	NA	NA	NA	NA	NA	NA	NA	NA	NA	NA	NA	NA	NA	NA	NA	NA	NA	NA	NA	12.5 (0.005209)	NA	NA	NA	NA	NA	8 (0.005275)	NA	NA	NA	NA	NA	NA	NA	NA	NA
cytochrome complex	NA	NA	NA	NA	NA	3.4 (0.014469)	NA	13.5 (0)	NA	NA	NA	NA	NA	NA	NA	NA	NA	NA	NA	NA	NA	NA	NA	NA	NA	NA	NA	NA	NA	12.6 (0)	NA	NA	NA	NA	NA	NA	NA	NA	NA	NA	4.4 (0.009959)
cytochrome complex assembly	NA	NA	NA	NA	NA	NA	NA	NA	NA	NA	NA	NA	NA	NA	NA	NA	NA	NA	NA	NA	NA	NA	NA	NA	NA	NA	NA	NA	NA	NA	NA	NA	NA	NA	NA	NA	NA	NA	NA	NA	3.5 (0.005039)
cytoplasmic translation	NA	NA	NA	NA	NA	NA	NA	NA	2.2 (0.016438)	NA	NA	NA	NA	NA	NA	NA	NA	NA	NA	NA	NA	NA	NA	NA	NA	NA	NA	NA	NA	NA	NA	NA	NA	NA	NA	NA	NA	NA	NA	NA	NA
cytoskeletal motor activity	NA	NA	NA	NA	NA	NA	NA	NA	NA	NA	NA	NA	NA	NA	NA	NA	NA	NA	NA	NA	NA	NA	NA	NA	NA	NA	NA	2.9 (0.045936)	NA	NA	NA	NA	NA	NA	NA	NA	NA	NA	NA	NA	NA
cytoskeleton organization	NA	NA	NA	NA	NA	NA	NA	NA	NA	NA	NA	NA	NA	NA	NA	3.5 (0.046282)	NA	NA	NA	NA	NA	NA	NA	NA	NA	NA	NA	NA	NA	NA	NA	NA	NA	NA	NA	NA	NA	NA	NA	NA	NA
cytoskeleton-dependent intracellular transport	NA	NA	NA	NA	NA	NA	NA	4.4 (0.009245)	NA	NA	NA	NA	NA	NA	NA	7.1 (0.03592)	NA	NA	NA	NA	NA	NA	NA	NA	NA	NA	NA	2.6 (0.016756)	NA	NA	NA	NA	NA	NA	NA	NA	NA	NA	NA	NA	NA
demethylation	NA	NA	NA	NA	NA	NA	NA	NA	NA	NA	NA	NA	NA	NA	NA	NA	6.5 (0.038432)	NA	NA	NA	NA	NA	NA	NA	NA	NA	NA	NA	NA	NA	NA	NA	NA	NA	NA	NA	NA	NA	NA	NA	NA
deoxyribonucleoside metabolic process	NA	NA	NA	NA	NA	NA	NA	NA	NA	NA	NA	NA	NA	NA	NA	NA	NA	NA	NA	NA	NA	NA	NA	NA	NA	NA	NA	NA	NA	NA	NA	NA	NA	NA	NA	Inf (0.033333)	NA	NA	NA	NA	NA
developmental process	NA	NA	NA	NA	NA	2.2 (4e-06)	2.7 (7e-06)	2.7 (0.002715)	NA	NA	NA	NA	NA	NA	NA	NA	NA	NA	NA	NA	2.4 (0.000477)	NA	NA	NA	NA	NA	NA	NA	NA	NA	NA	NA	NA	NA	NA	NA	2.2 (0.038535)	NA	NA	NA	NA
dicarboxylic acid metabolic process	NA	NA	6.2 (0.049818)	NA	NA	NA	NA	NA	NA	NA	NA	NA	NA	NA	NA	NA	NA	NA	NA	NA	NA	NA	NA	NA	NA	NA	NA	NA	NA	3.4 (0.004218)	NA	NA	NA	NA	NA	NA	NA	NA	NA	NA	NA
divalent inorganic cation homeostasis	NA	NA	NA	NA	NA	NA	NA	NA	NA	NA	NA	NA	NA	NA	NA	NA	NA	NA	NA	NA	NA	NA	NA	NA	NA	NA	NA	NA	NA	NA	NA	NA	NA	NA	NA	NA	NA	NA	NA	NA	2.6 (0.036546)
dynein heavy chain binding	NA	NA	NA	NA	NA	NA	NA	NA	NA	NA	NA	NA	NA	NA	NA	100 (0.02905)	12.5 (0.046988)	NA	NA	NA	NA	NA	NA	NA	NA	NA	NA	NA	NA	NA	NA	NA	NA	NA	NA	NA	NA	NA	NA	NA	NA
dynein light chain binding	NA	NA	NA	NA	NA	NA	NA	NA	NA	NA	NA	NA	11.1 (0.038391)	NA	NA	100 (0.014625)	25 (0.023766)	NA	NA	NA	25 (0.036563)	NA	NA	NA	NA	NA	NA	NA	NA	NA	NA	NA	NA	NA	NA	NA	NA	NA	NA	NA	NA
eisosome	NA	NA	NA	NA	NA	NA	NA	NA	NA	NA	NA	NA	NA	NA	NA	NA	3.8 (0.049353)	NA	NA	NA	NA	NA	NA	NA	NA	NA	NA	NA	NA	4.5 (0.010705)	NA	NA	NA	NA	NA	NA	NA	NA	NA	NA	NA
electron transport chain	NA	NA	NA	NA	NA	NA	NA	8.3 (0.002338)	NA	NA	NA	NA	NA	NA	NA	NA	NA	NA	NA	NA	NA	NA	NA	NA	NA	NA	NA	NA	NA	8.6 (0.00032)	NA	NA	NA	NA	NA	NA	NA	NA	NA	NA	NA
endocytic patch	NA	NA	NA	NA	NA	NA	NA	NA	NA	NA	NA	NA	NA	NA	NA	NA	NA	NA	NA	NA	NA	NA	NA	NA	NA	NA	NA	NA	NA	2.4 (0.035915)	NA	NA	NA	NA	NA	NA	NA	NA	NA	NA	NA
endodeoxyribonuclease complex	NA	NA	100 (0.011756)	NA	NA	NA	NA	NA	NA	NA	NA	NA	NA	NA	NA	NA	NA	NA	NA	NA	NA	NA	NA	NA	NA	NA	NA	NA	NA	NA	NA	NA	NA	NA	NA	NA	NA	10 (0.005887)	4.2 (0.035059)	Inf (0.002946)	NA
endomembrane system organization	NA	NA	NA	NA	NA	NA	NA	2.9 (0.001024)	NA	NA	NA	NA	NA	NA	NA	NA	NA	NA	NA	NA	NA	NA	NA	NA	NA	NA	NA	NA	NA	NA	NA	NA	NA	NA	NA	NA	NA	NA	NA	NA	NA
endopeptidase activity	NA	NA	NA	NA	NA	NA	3.1 (0.00357)	4.3 (0.000505)	NA	NA	NA	NA	NA	NA	NA	NA	2.3 (0.045778)	NA	NA	NA	NA	NA	NA	NA	NA	NA	NA	NA	NA	3.5 (0.013922)	NA	NA	NA	NA	NA	NA	NA	NA	NA	NA	4.5 (0.027806)
endosomal transport	NA	NA	NA	NA	NA	NA	NA	NA	NA	NA	NA	NA	NA	NA	NA	NA	NA	NA	NA	NA	NA	NA	NA	NA	NA	NA	NA	NA	NA	2.3 (0.042757)	NA	NA	NA	NA	NA	NA	NA	NA	NA	NA	NA
endosomal vesicle fusion	NA	NA	NA	NA	NA	NA	NA	NA	NA	NA	NA	NA	NA	NA	NA	NA	NA	NA	NA	NA	NA	NA	NA	NA	NA	NA	NA	NA	3 (0.046512)	NA	NA	NA	NA	NA	NA	NA	NA	NA	NA	NA	NA
energy coupled proton transport, down electrochemical gradient	NA	NA	NA	NA	NA	NA	NA	7.5 (0.039311)	NA	NA	NA	NA	NA	NA	NA	NA	NA	NA	NA	NA	NA	NA	NA	NA	NA	NA	NA	NA	NA	10.8 (0)	NA	NA	NA	NA	NA	NA	NA	NA	NA	NA	NA
energy derivation by oxidation of organic compounds	NA	NA	NA	NA	NA	NA	NA	NA	NA	NA	NA	NA	NA	NA	NA	NA	NA	NA	NA	NA	NA	NA	NA	NA	NA	NA	NA	NA	NA	5.9 (0.000474)	NA	NA	NA	NA	NA	NA	NA	NA	NA	NA	NA
energy reserve metabolic process	NA	NA	NA	NA	NA	NA	NA	NA	NA	NA	NA	NA	NA	NA	NA	NA	6.1 (0.004686)	NA	NA	NA	4.6 (0.021383)	NA	NA	NA	NA	23.5 (0.027817)	2.1 (0.018268)	NA	NA	NA	NA	NA	NA	NA	NA	NA	NA	NA	NA	NA	NA
envelope	NA	NA	NA	NA	NA	NA	NA	NA	NA	NA	NA	NA	NA	NA	NA	NA	NA	NA	NA	NA	NA	NA	NA	NA	NA	NA	NA	NA	NA	2.2 (7.9e-05)	NA	NA	NA	NA	NA	NA	NA	NA	NA	NA	NA
erythrose 4-phosphate/phosphoenolpyruvate family amino acid metabolic process	NA	NA	NA	5.1 (0.004459)	3.6 (0.031261)	8 (0.031261)	8.7 (0.021399)	NA	NA	NA	3.4 (0.006767)	NA	NA	NA	NA	NA	NA	NA	NA	NA	NA	8.8 (9e-05)	15.4 (0.031261)	100 (0.006767)	NA	50 (0.021399)	NA	NA	NA	NA	200 (0.006767)	NA	NA	NA	NA	NA	NA	NA	NA	100 (0.006767)	6.9 (0.031261)
ether metabolic process	NA	NA	NA	NA	NA	NA	NA	NA	NA	NA	3.3 (0.027931)	NA	NA	NA	NA	NA	NA	NA	NA	NA	NA	NA	NA	NA	NA	NA	NA	NA	3 (0.027931)	NA	NA	NA	NA	NA	NA	NA	NA	NA	NA	NA	NA
eukaryotic translation initiation factor 4F complex assembly	NA	NA	NA	NA	7.1 (0.019305)	16.7 (0.015459)	NA	NA	NA	NA	NA	NA	NA	NA	NA	NA	NA	NA	NA	NA	NA	NA	NA	NA	NA	NA	NA	NA	NA	NA	NA	NA	NA	NA	NA	NA	NA	NA	NA	NA	NA
export from cell	NA	3.1 (0.049782)	3.9 (0.048733)	NA	NA	NA	NA	NA	NA	NA	NA	NA	NA	NA	NA	4.7 (0.033839)	NA	NA	NA	NA	NA	NA	NA	NA	NA	NA	NA	NA	NA	NA	NA	NA	NA	NA	NA	NA	2.6 (0.036972)	NA	NA	NA	NA
external encapsulating structure	NA	NA	NA	NA	NA	NA	2.8 (0.000273)	3.4 (0.001577)	NA	NA	NA	NA	NA	NA	NA	8.3 (0.01421)	3 (0.004693)	2.7 (0.003591)	NA	5.9 (0.016959)	3.3 (5.3e-05)	NA	NA	NA	NA	NA	NA	NA	NA	NA	NA	6.4 (0.012387)	NA	NA	NA	NA	NA	NA	NA	NA	2.9 (0.009822)
external encapsulating structure organization	NA	NA	NA	NA	NA	NA	3 (0)	3.1 (0.000624)	NA	NA	NA	NA	NA	NA	NA	NA	2.2 (5e-06)	NA	2.9 (0.000317)	NA	2.8 (7e-06)	NA	NA	NA	NA	NA	NA	NA	NA	NA	NA	NA	NA	NA	NA	NA	NA	NA	NA	NA	3.1 (1.8e-05)
extracellular region	NA	NA	NA	NA	NA	NA	2.7 (0.002578)	3.7 (0.001756)	3.2 (0.029763)	NA	NA	NA	2.1 (0)	NA	NA	8.2 (0.008021)	3.7 (8.3e-05)	3 (0.00018)	3 (0.039024)	7.7 (0.000224)	3.2 (0.000456)	NA	NA	NA	NA	8.7 (0.003064)	NA	NA	NA	NA	NA	8.3 (0.000224)	NA	NA	NA	NA	NA	NA	NA	NA	3.7 (0.000593)
fermentation	NA	NA	NA	NA	NA	NA	NA	NA	NA	NA	NA	NA	NA	NA	NA	28.6 (0.021554)	NA	NA	NA	NA	NA	NA	NA	NA	NA	NA	NA	NA	NA	NA	NA	NA	NA	NA	NA	NA	NA	NA	NA	NA	NA
ferroxidase complex	NA	NA	NA	NA	NA	NA	NA	NA	NA	NA	NA	NA	NA	NA	NA	NA	NA	NA	NA	100 (0.008097)	13.3 (0.023416)	NA	NA	NA	NA	NA	NA	NA	NA	NA	NA	NA	NA	NA	NA	NA	NA	NA	NA	NA	NA
flavin adenine dinucleotide binding	2.7 (0.018178)	NA	NA	NA	NA	NA	4.1 (0.000603)	NA	NA	NA	NA	NA	NA	NA	NA	NA	3.8 (0.007539)	NA	NA	NA	NA	NA	3.6 (0.026498)	NA	NA	NA	NA	NA	NA	NA	NA	NA	NA	NA	NA	NA	NA	NA	NA	NA	NA
fluid transport	16.7 (0.023528)	NA	NA	NA	NA	NA	11.1 (0.037467)	NA	NA	14.3 (0.042083)	NA	9.5 (0.001202)	NA	NA	NA	NA	NA	12.5 (0.042083)	NA	NA	NA	7.7 (0.030514)	NA	100 (0.011811)	NA	NA	9.5 (0.002318)	NA	NA	NA	NA	50 (0.018853)	10 (0.021192)	NA	2.2 (0.025861)	NA	NA	NA	NA	NA	NA
fructose 1,6-bisphosphate metabolic process	NA	NA	NA	NA	NA	NA	NA	NA	NA	NA	NA	NA	NA	NA	NA	NA	NA	NA	NA	NA	NA	7.7 (0.027906)	NA	NA	NA	NA	4.8 (0.041662)	NA	NA	NA	NA	NA	NA	NA	NA	NA	NA	NA	NA	NA	NA
fructose 6-phosphate metabolic process	NA	NA	NA	NA	NA	NA	NA	NA	NA	NA	NA	NA	NA	NA	NA	NA	NA	NA	NA	NA	NA	5.9 (0.03712)	NA	NA	NA	NA	NA	NA	NA	NA	NA	NA	NA	NA	NA	NA	NA	NA	NA	NA	NA
galacturonan metabolic process	NA	NA	NA	NA	NA	NA	NA	NA	NA	50 (0.030769)	14.3 (0.015385)	NA	NA	NA	NA	NA	NA	NA	NA	100 (0.015385)	NA	25 (0.030769)	50 (0.015385)	Inf (0.015385)	NA	NA	NA	NA	12.5 (0.015385)	NA	NA	100 (0.015385)	NA	NA	6.7 (0.015385)	NA	NA	20 (0.046154)	NA	NA	NA
general transcription initiation factor activity	NA	NA	9.5 (0.00267)	NA	NA	NA	NA	NA	NA	NA	NA	NA	NA	NA	NA	NA	NA	NA	NA	NA	NA	NA	NA	NA	NA	NA	NA	NA	NA	NA	NA	NA	NA	14.3 (0.014987)	NA	NA	NA	NA	NA	NA	NA
generation of precursor metabolites and energy	NA	NA	NA	NA	NA	NA	NA	3.3 (4e-06)	NA	NA	NA	NA	NA	NA	NA	5.8 (0.003522)	3.8 (0)	NA	NA	NA	NA	NA	NA	NA	NA	7.1 (0.000361)	NA	NA	NA	5 (0)	NA	NA	NA	NA	NA	NA	NA	NA	NA	NA	2.4 (0.002644)
gluconokinase activity	NA	NA	NA	NA	NA	NA	NA	NA	NA	NA	NA	NA	NA	NA	NA	NA	NA	NA	NA	NA	NA	NA	NA	NA	NA	NA	NA	NA	NA	NA	NA	NA	NA	NA	NA	NA	NA	NA	NA	NA	25 (0.049383)
glucose 1-phosphate metabolic process	NA	NA	NA	NA	NA	NA	NA	NA	NA	NA	NA	NA	NA	NA	NA	NA	NA	NA	NA	NA	NA	NA	NA	NA	NA	NA	7.1 (0.027906)	NA	NA	NA	NA	NA	NA	NA	NA	NA	NA	NA	NA	NA	NA
glucose 6-phosphate metabolic process	NA	NA	NA	NA	NA	NA	NA	NA	NA	NA	NA	NA	NA	NA	NA	NA	6.1 (0.034225)	NA	NA	NA	NA	NA	NA	NA	NA	NA	NA	NA	NA	NA	NA	NA	NA	NA	NA	NA	NA	NA	NA	NA	NA
glucosyltransferase activity	NA	NA	NA	NA	NA	NA	NA	NA	NA	NA	NA	NA	NA	NA	NA	NA	7.4 (0.011353)	NA	NA	NA	3.7 (0.035603)	NA	NA	NA	NA	42.9 (0.021494)	NA	NA	NA	5.3 (0.002367)	NA	NA	NA	NA	NA	NA	NA	NA	NA	NA	NA
glutamate N-acetyltransferase activity	50 (0.02381)	NA	NA	NA	NA	NA	NA	NA	NA	NA	NA	NA	NA	NA	NA	NA	25 (0.02381)	NA	NA	NA	NA	NA	NA	NA	NA	NA	NA	16.7 (0.02381)	NA	NA	NA	NA	NA	NA	NA	NA	NA	NA	NA	NA	NA
glutaminase complex	50 (0.008837)	50 (0.023564)	NA	14.3 (0.014728)	NA	NA	33.3 (0.008837)	NA	NA	50 (0.008837)	NA	14.3 (0.013255)	11.1 (0.030928)	100 (0.002946)	5.6 (0.030928)	NA	NA	33.3 (0.007364)	NA	NA	NA	NA	NA	NA	NA	NA	14.3 (0.020619)	16.7 (0.039764)	12.5 (0.008837)	NA	NA	NA	NA	NA	6.7 (0.004418)	NA	NA	NA	NA	NA	25 (0.030928)
glutathione transferase activity	NA	NA	NA	NA	NA	NA	NA	NA	NA	NA	NA	NA	3 (0.023256)	NA	NA	NA	NA	NA	NA	NA	7.4 (0.023256)	NA	NA	NA	NA	NA	NA	NA	NA	6.4 (0.002836)	NA	NA	NA	NA	NA	NA	NA	NA	NA	NA	8 (0.023256)
glycerate kinase activity	NA	NA	NA	NA	NA	NA	NA	NA	NA	NA	NA	NA	NA	NA	NA	NA	25 (0.045267)	NA	NA	NA	NA	NA	NA	NA	NA	NA	NA	NA	NA	NA	NA	NA	NA	NA	NA	NA	NA	NA	NA	NA	NA
glycerol-1-phosphatase activity	NA	NA	NA	NA	NA	NA	NA	NA	NA	NA	NA	NA	NA	NA	NA	NA	NA	NA	NA	NA	NA	NA	20 (0.021127)	NA	NA	NA	NA	NA	NA	NA	NA	NA	NA	NA	NA	NA	NA	NA	NA	NA	NA
glycine cleavage complex	NA	NA	NA	NA	NA	NA	NA	NA	NA	NA	NA	NA	NA	NA	NA	100 (0.004505)	NA	NA	NA	NA	NA	NA	NA	NA	NA	100 (0.013256)	NA	NA	NA	NA	NA	NA	NA	NA	NA	NA	NA	NA	NA	NA	NA
glycine metabolic process	NA	NA	NA	NA	NA	NA	NA	NA	NA	NA	NA	NA	NA	NA	NA	75 (0.005348)	NA	NA	NA	NA	NA	NA	NA	NA	NA	75 (0.005348)	NA	NA	NA	NA	NA	NA	NA	NA	NA	NA	NA	NA	NA	NA	NA
glycogen (starch) synthase activity	NA	NA	NA	NA	NA	NA	NA	NA	NA	NA	NA	NA	NA	NA	NA	NA	NA	NA	NA	NA	25 (0.018182)	NA	NA	NA	NA	NA	NA	NA	NA	NA	NA	NA	NA	NA	NA	NA	NA	NA	NA	NA	NA
glycoside metabolic process	NA	NA	NA	NA	NA	NA	NA	NA	NA	NA	NA	NA	NA	NA	NA	NA	25 (0.028571)	NA	NA	NA	NA	NA	NA	NA	NA	NA	NA	NA	NA	NA	NA	NA	NA	NA	NA	NA	NA	NA	NA	NA	NA
glycoside transport	NA	NA	NA	NA	NA	NA	NA	NA	NA	NA	NA	NA	NA	NA	NA	NA	NA	NA	NA	NA	25 (0.001107)	NA	NA	NA	NA	100 (0.046512)	NA	NA	NA	15.4 (0.023256)	NA	NA	NA	NA	NA	NA	NA	NA	NA	NA	NA
glycosyltransferase activity	NA	NA	NA	NA	NA	NA	NA	NA	NA	NA	NA	NA	NA	NA	NA	NA	NA	NA	NA	NA	NA	NA	NA	NA	NA	8.2 (0.016517)	NA	NA	NA	NA	NA	NA	NA	NA	NA	NA	NA	NA	NA	NA	NA
growth	NA	NA	NA	NA	NA	NA	NA	2.7 (0.008516)	NA	NA	NA	NA	NA	NA	NA	NA	NA	NA	NA	NA	NA	NA	NA	NA	NA	NA	NA	NA	NA	NA	NA	NA	NA	NA	NA	NA	NA	NA	NA	NA	NA
heat acclimation	NA	NA	NA	NA	NA	NA	NA	40 (0.009498)	40 (0.004523)	NA	NA	NA	10.5 (0.009498)	NA	NA	NA	NA	NA	NA	NA	NA	NA	NA	NA	NA	NA	NA	NA	NA	15.4 (0.04749)	NA	NA	NA	NA	NA	NA	NA	NA	NA	NA	28.6 (0.012664)
heterocyclic compound binding	NA	NA	NA	NA	NA	NA	NA	NA	NA	NA	NA	NA	NA	NA	NA	NA	NA	NA	NA	NA	NA	NA	NA	NA	NA	NA	NA	NA	NA	NA	NA	NA	NA	NA	NA	NA	NA	NA	NA	3 (0.027102)	NA
histone H2A-H2B dimer displacement	NA	NA	NA	NA	NA	NA	NA	NA	NA	NA	NA	NA	NA	NA	NA	NA	NA	NA	NA	NA	NA	NA	NA	NA	NA	NA	14.3 (0.043478)	16.7 (0.043478)	NA	NA	NA	NA	NA	NA	NA	NA	NA	NA	NA	NA	NA
histone H3-K36 methylation	NA	NA	NA	NA	NA	NA	NA	NA	33.3 (0.001189)	NA	NA	NA	NA	NA	NA	NA	NA	NA	NA	NA	NA	NA	NA	NA	NA	NA	NA	NA	NA	NA	NA	NA	NA	NA	NA	NA	NA	NA	NA	NA	NA
histone deacetylase complex	NA	NA	NA	NA	NA	NA	NA	NA	NA	NA	NA	NA	NA	NA	NA	NA	NA	NA	NA	NA	2.1 (0.029836)	NA	NA	NA	NA	NA	NA	NA	NA	NA	NA	NA	NA	NA	NA	NA	NA	NA	NA	NA	NA
histone modification	NA	2.9 (0.019192)	NA	NA	NA	NA	NA	NA	3.1 (0.000453)	NA	NA	NA	NA	NA	NA	NA	NA	NA	NA	NA	NA	NA	NA	NA	NA	NA	NA	NA	NA	NA	NA	NA	NA	NA	NA	NA	NA	NA	NA	NA	NA
homeostatic process	NA	NA	NA	NA	NA	NA	NA	NA	NA	NA	NA	NA	NA	NA	NA	NA	NA	NA	NA	5.1 (0.013032)	NA	NA	NA	NA	NA	NA	NA	NA	NA	NA	NA	NA	NA	NA	NA	NA	NA	NA	NA	NA	NA
host cellular component	NA	NA	NA	NA	NA	NA	NA	NA	NA	NA	NA	NA	NA	NA	NA	50 (0.026504)	NA	NA	NA	NA	NA	NA	NA	NA	NA	NA	NA	NA	NA	NA	NA	NA	NA	NA	NA	NA	NA	NA	NA	NA	NA
hydrolase activity, acting on acid anhydrides	NA	NA	NA	NA	NA	NA	NA	NA	2.5 (0.004599)	NA	NA	NA	NA	NA	NA	NA	NA	NA	NA	NA	NA	NA	NA	NA	NA	NA	NA	NA	NA	NA	NA	NA	NA	NA	NA	NA	NA	NA	NA	NA	NA
hydrolase activity, acting on carbon-nitrogen (but not peptide) bonds	3.2 (0.001186)	NA	NA	NA	NA	NA	NA	NA	NA	2.1 (0.041025)	NA	NA	NA	NA	NA	6.2 (0.036237)	NA	NA	NA	NA	NA	NA	NA	NA	NA	NA	NA	NA	NA	NA	NA	NA	NA	7.7 (0.002775)	NA	NA	NA	NA	NA	NA	NA
hydrolase activity, acting on carbon-nitrogen (but not peptide) bonds, in cyclic amides	18.2 (0.03374)	NA	NA	NA	NA	NA	NA	NA	NA	NA	NA	NA	NA	NA	NA	NA	NA	NA	NA	NA	NA	NA	NA	NA	NA	NA	NA	NA	NA	NA	NA	NA	NA	NA	NA	NA	NA	NA	NA	NA	NA
hydrolase activity, acting on ether bonds	16.7 (0.027246)	NA	NA	4.5 (0.043354)	4.8 (0.046022)	11.1 (0.029944)	NA	NA	NA	14.3 (0.040682)	4.5 (0.013686)	4.8 (0.040682)	NA	NA	NA	NA	NA	NA	NA	NA	NA	NA	NA	NA	NA	NA	NA	NA	4 (0.021837)	NA	NA	NA	10 (0.019125)	NA	2.2 (0.019125)	NA	NA	NA	NA	NA	NA
hydrolase activity, acting on glycosyl bonds	NA	NA	NA	NA	NA	NA	NA	NA	NA	2.5 (0.026408)	NA	NA	NA	NA	NA	NA	2.6 (0.029649)	NA	2.8 (0.044872)	7.1 (0.001974)	NA	NA	2.5 (0.035865)	13.3 (0.005752)	NA	8 (0.046466)	NA	NA	NA	NA	NA	7.7 (0.011175)	NA	NA	NA	NA	NA	NA	NA	NA	4 (0.010142)
hydroxymethyl-, formyl- and related transferase activity	NA	NA	NA	NA	NA	NA	NA	NA	NA	11.8 (0.01037)	NA	NA	NA	NA	NA	50 (0.003568)	NA	NA	NA	NA	NA	NA	NA	NA	NA	50 (0.003568)	NA	NA	NA	NA	NA	NA	NA	66.7 (0.003568)	NA	NA	NA	NA	NA	200 (0.003568)	NA
hyperosmotic response	NA	NA	NA	NA	NA	NA	NA	NA	5.4 (0.044757)	NA	NA	NA	NA	NA	NA	NA	NA	NA	NA	NA	NA	NA	NA	NA	NA	NA	NA	NA	NA	NA	NA	NA	NA	NA	NA	NA	NA	NA	NA	NA	NA
identical protein binding	NA	NA	NA	NA	NA	NA	NA	NA	NA	NA	NA	NA	NA	NA	NA	NA	NA	NA	NA	12.5 (0.023636)	NA	NA	NA	25 (0.035259)	NA	NA	NA	NA	NA	NA	NA	NA	NA	NA	NA	NA	NA	NA	NA	NA	NA
import across plasma membrane	NA	NA	NA	NA	NA	NA	NA	NA	NA	NA	NA	NA	NA	NA	NA	NA	NA	NA	NA	NA	NA	NA	NA	NA	100 (0.031477)	NA	NA	NA	NA	NA	NA	NA	NA	NA	NA	NA	NA	NA	NA	NA	NA
import into cell	NA	NA	NA	NA	NA	NA	NA	NA	NA	3.6 (0.010967)	NA	NA	NA	NA	NA	NA	NA	NA	NA	NA	NA	NA	NA	NA	NA	NA	NA	NA	NA	NA	NA	NA	NA	NA	NA	NA	NA	NA	NA	NA	NA
indole-containing compound metabolic process	6.2 (0.011533)	NA	NA	4.5 (5e-06)	3.9 (8e-05)	8.7 (4e-05)	4.7 (0.023897)	NA	NA	5.4 (0.009071)	2.7 (2.3e-05)	NA	NA	NA	NA	NA	NA	NA	NA	NA	NA	3.1 (0.002033)	8 (0.00688)	20 (0.019255)	100 (0.038164)	NA	NA	NA	NA	NA	50 (0.038164)	NA	3.8 (0.00335)	NA	NA	28.6 (0.00497)	6.7 (0.02757)	NA	NA	NA	NA
indolepyruvate decarboxylase activity	NA	NA	NA	6.9 (0.023715)	NA	NA	NA	NA	NA	NA	6.7 (0.023715)	NA	NA	NA	2.7 (0.023715)	NA	NA	NA	NA	NA	NA	11.8 (0.023715)	NA	NA	NA	NA	NA	NA	NA	NA	NA	NA	NA	NA	NA	NA	NA	NA	NA	NA	NA
inner mitochondrial membrane organization	NA	NA	NA	NA	NA	NA	NA	NA	NA	NA	NA	NA	NA	NA	NA	NA	NA	NA	NA	NA	NA	NA	NA	NA	NA	NA	NA	NA	NA	4.2 (0.005596)	NA	NA	NA	NA	NA	NA	NA	NA	NA	NA	NA
inorganic ion transmembrane transport	NA	NA	NA	NA	NA	NA	NA	NA	NA	NA	NA	NA	NA	NA	NA	NA	NA	NA	NA	NA	NA	NA	NA	NA	NA	NA	NA	NA	NA	4.2 (0.001238)	NA	NA	NA	NA	NA	NA	NA	NA	NA	NA	NA
inorganic molecular entity transmembrane transporter activity	NA	NA	NA	NA	NA	NA	NA	2.9 (0.007171)	NA	NA	NA	NA	NA	NA	NA	NA	NA	NA	NA	NA	NA	NA	NA	NA	NA	NA	NA	NA	NA	3.9 (0.000186)	NA	NA	NA	NA	NA	NA	NA	NA	NA	NA	NA
intracellular immature spore	2.5 (0.01962)	NA	5.3 (0.042596)	2.2 (3e-06)	2.3 (3e-06)	5.1 (0)	4.3 (0.00016)	NA	NA	NA	NA	NA	NA	2.5 (0.027227)	NA	NA	NA	NA	NA	NA	5.5 (1e-06)	NA	NA	NA	NA	NA	NA	3.1 (4e-05)	NA	NA	NA	NA	NA	NA	NA	NA	4.4 (0.009177)	2.1 (4e-06)	NA	NA	NA
intraciliary transport particle	NA	NA	NA	NA	NA	NA	NA	NA	NA	NA	NA	NA	5.3 (0.035422)	NA	NA	100 (0.011878)	12.5 (0.029562)	NA	NA	NA	12.5 (0.042235)	NA	NA	NA	NA	NA	NA	NA	NA	NA	NA	NA	NA	NA	NA	NA	NA	NA	NA	NA	NA
intramolecular transferase activity, phosphotransferases	NA	NA	NA	NA	NA	NA	NA	NA	NA	NA	NA	NA	NA	NA	NA	NA	6.6 (0.049754)	NA	NA	NA	NA	NA	NA	NA	NA	NA	NA	NA	NA	NA	NA	NA	NA	NA	NA	NA	NA	NA	NA	NA	NA
intrinsic component of plasma membrane	3.6 (0.001565)	NA	NA	NA	NA	NA	NA	NA	NA	3.1 (0.01204)	NA	NA	NA	NA	NA	NA	NA	NA	NA	6.7 (0.047463)	NA	NA	2.3 (0.029901)	NA	NA	NA	NA	NA	NA	NA	NA	NA	NA	NA	NA	NA	NA	NA	NA	NA	3.2 (0.026118)
ion binding	NA	NA	NA	NA	NA	NA	NA	NA	NA	NA	NA	NA	NA	NA	NA	NA	NA	NA	NA	NA	NA	NA	NA	NA	NA	NA	NA	NA	NA	NA	NA	NA	NA	NA	NA	2.7 (0.005178)	NA	NA	NA	NA	NA
ion transport	NA	NA	NA	NA	NA	NA	NA	NA	NA	NA	NA	NA	NA	NA	NA	NA	NA	NA	2.2 (0.012383)	3.8 (0.000353)	NA	NA	NA	NA	NA	NA	NA	NA	NA	3.1 (0)	NA	NA	NA	NA	NA	NA	NA	NA	NA	NA	NA
iron ion homeostasis	NA	NA	NA	NA	NA	NA	NA	NA	NA	NA	NA	NA	NA	NA	NA	NA	NA	NA	NA	22.6 (0.039101)	3.8 (0.023867)	NA	NA	NA	NA	NA	2.7 (0.008667)	NA	NA	NA	NA	NA	NA	NA	NA	NA	NA	NA	NA	NA	NA
iron ion transport	NA	NA	NA	NA	NA	NA	NA	NA	NA	NA	NA	NA	NA	NA	NA	NA	5.3 (0.023196)	NA	NA	35 (0.023196)	4.6 (0.041422)	NA	NA	NA	NA	NA	NA	NA	NA	NA	NA	NA	NA	NA	NA	NA	NA	NA	NA	NA	NA
isocitrate dehydrogenase activity	NA	NA	NA	NA	NA	NA	NA	NA	NA	NA	NA	NA	6.4 (0.004951)	NA	NA	NA	NA	NA	NA	NA	NA	NA	NA	NA	NA	NA	NA	NA	NA	9.1 (0.015868)	NA	NA	NA	NA	NA	NA	NA	NA	NA	NA	NA
isomerase activity	NA	NA	NA	NA	NA	NA	NA	NA	NA	NA	NA	NA	NA	NA	NA	5.9 (0.040873)	3.8 (0.000304)	NA	NA	NA	NA	NA	NA	NA	NA	NA	NA	NA	NA	NA	NA	NA	NA	NA	NA	NA	NA	NA	NA	NA	NA
karyogamy	NA	NA	NA	NA	NA	NA	NA	10.9 (0.030729)	NA	NA	NA	NA	NA	NA	NA	NA	NA	NA	NA	NA	NA	NA	NA	NA	NA	NA	NA	NA	NA	NA	NA	NA	NA	NA	NA	NA	NA	NA	NA	NA	NA
kinetochore organization	NA	NA	NA	NA	NA	NA	NA	NA	NA	NA	NA	NA	NA	NA	NA	NA	NA	NA	NA	NA	NA	NA	NA	NA	NA	NA	NA	NA	NA	NA	NA	NA	NA	20 (0.04637)	NA	NA	NA	NA	NA	NA	NA
lactate dehydrogenase activity	NA	NA	NA	NA	NA	NA	NA	NA	NA	NA	NA	NA	NA	NA	NA	NA	12.5 (0.049002)	NA	NA	NA	NA	NA	NA	NA	NA	NA	NA	NA	NA	NA	NA	NA	NA	NA	NA	NA	NA	NA	NA	NA	14.3 (0.027218)
ligase activity, forming carbon-carbon bonds	NA	NA	NA	NA	NA	NA	9.1 (0.02649)	NA	NA	NA	NA	NA	NA	NA	NA	NA	NA	NA	NA	NA	NA	NA	NA	NA	NA	NA	NA	NA	NA	NA	NA	NA	NA	NA	NA	NA	NA	NA	NA	NA	NA
lipase activity	NA	NA	NA	NA	NA	NA	NA	NA	NA	NA	NA	NA	NA	NA	NA	NA	3.5 (0.018063)	NA	NA	NA	NA	NA	NA	NA	NA	NA	NA	NA	NA	NA	NA	NA	NA	NA	NA	NA	NA	NA	NA	NA	NA
lipid binding	NA	NA	NA	NA	NA	NA	NA	NA	NA	NA	NA	NA	NA	NA	NA	NA	NA	NA	NA	NA	NA	NA	NA	NA	NA	NA	NA	NA	NA	NA	NA	2.6 (0.041765)	NA	NA	NA	NA	NA	NA	NA	NA	NA
lipid homeostasis	NA	NA	NA	NA	NA	NA	3.3 (0.012512)	NA	NA	NA	NA	NA	NA	NA	NA	NA	NA	NA	NA	NA	NA	NA	NA	NA	NA	NA	NA	NA	NA	NA	NA	NA	NA	NA	NA	NA	NA	NA	NA	NA	NA
lipoprotein metabolic process	NA	NA	NA	NA	NA	NA	NA	NA	NA	NA	NA	NA	NA	NA	NA	NA	NA	NA	NA	NA	NA	NA	NA	NA	NA	NA	NA	NA	NA	NA	NA	NA	NA	NA	NA	9.5 (0.023837)	NA	NA	NA	NA	NA
lipoyl(octanoyl) transferase activity	NA	NA	NA	NA	14.3 (0.026316)	33.3 (0.026316)	NA	NA	NA	NA	NA	NA	NA	NA	NA	NA	NA	NA	NA	NA	NA	NA	NA	NA	NA	NA	NA	NA	NA	NA	NA	NA	NA	NA	NA	NA	NA	NA	NA	NA	25 (0.026316)
lyase activity	NA	NA	NA	NA	NA	NA	NA	NA	NA	NA	NA	NA	NA	NA	NA	5.8 (0.018193)	3.3 (0.000722)	NA	NA	NA	NA	NA	NA	NA	NA	NA	NA	NA	NA	NA	NA	NA	NA	NA	NA	NA	NA	NA	NA	12 (0.012908)	NA
lysophosphatidic acid phosphatase activity	NA	NA	NA	NA	NA	NA	33.3 (0.035211)	NA	50 (0.028169)	NA	NA	NA	NA	NA	NA	NA	NA	33.3 (0.042254)	NA	NA	NA	NA	NA	NA	NA	NA	NA	16.7 (0.049296)	NA	NA	NA	NA	NA	NA	NA	NA	50 (0.021127)	NA	NA	NA	NA
lysosomal microautophagy	NA	NA	NA	NA	NA	NA	NA	NA	NA	NA	NA	NA	NA	NA	NA	NA	NA	3 (0.003127)	NA	NA	NA	NA	NA	NA	NA	11.1 (0.01353)	NA	NA	NA	NA	NA	NA	NA	NA	NA	NA	NA	NA	NA	NA	NA
lytic vacuole	NA	NA	NA	NA	NA	NA	NA	NA	NA	NA	NA	NA	NA	NA	NA	NA	NA	NA	NA	2.7 (0.011378)	NA	NA	NA	NA	NA	NA	NA	NA	NA	NA	NA	NA	NA	NA	NA	3.5 (0.047839)	NA	NA	NA	NA	NA
m7G(5')pppN diphosphatase activity	NA	NA	NA	NA	NA	NA	NA	NA	NA	NA	NA	NA	NA	NA	NA	NA	12.5 (0.002152)	NA	NA	NA	NA	NA	NA	NA	NA	NA	NA	NA	NA	NA	NA	NA	NA	NA	NA	NA	NA	NA	NA	NA	NA
mRNA 3'-UTR binding	NA	NA	NA	2.5 (0.026449)	2.7 (0.026449)	5.9 (0.016379)	NA	NA	NA	NA	NA	NA	NA	NA	NA	NA	NA	NA	NA	NA	NA	NA	NA	NA	NA	NA	NA	4.4 (0.028152)	NA	NA	NA	NA	NA	NA	NA	NA	NA	NA	NA	NA	NA
mRNA cis splicing, via spliceosome	NA	16 (0.022721)	NA	NA	NA	NA	NA	NA	NA	NA	NA	NA	NA	NA	NA	NA	NA	NA	NA	NA	NA	NA	NA	NA	NA	NA	NA	NA	NA	NA	NA	NA	NA	NA	NA	NA	NA	NA	NA	NA	NA
mRNA editing complex	NA	NA	NA	4.5 (0.028036)	4.8 (0.030956)	11.1 (0.029497)	NA	25 (0.001317)	NA	NA	4.5 (0.004462)	NA	NA	NA	NA	NA	NA	NA	NA	NA	NA	NA	NA	NA	NA	NA	4.8 (0.038231)	NA	4 (0.020709)	NA	NA	NA	NA	NA	2.2 (0.005946)	NA	NA	6.7 (0.011869)	NA	NA	NA
mRNA localization resulting in posttranscriptional regulation of gene expression	NA	NA	NA	13.3 (0.012821)	14.3 (0.012821)	33.3 (0.012821)	NA	NA	NA	NA	NA	NA	NA	NA	NA	NA	NA	NA	NA	NA	NA	NA	NA	NA	NA	NA	NA	16.7 (0.012821)	NA	NA	NA	NA	NA	NA	NA	NA	NA	NA	8.3 (0.012821)	NA	NA
macromolecule deacylation	NA	NA	NA	NA	NA	NA	NA	NA	NA	NA	NA	NA	NA	NA	NA	NA	NA	NA	NA	NA	2.9 (0.042025)	NA	NA	NA	NA	NA	NA	NA	NA	NA	NA	NA	NA	NA	NA	NA	NA	NA	NA	NA	NA
magnesium ion binding	NA	NA	NA	NA	NA	NA	NA	NA	NA	NA	NA	NA	NA	NA	NA	NA	4.5 (0.000821)	NA	NA	NA	NA	NA	NA	NA	NA	7.4 (0.043998)	NA	NA	NA	NA	NA	NA	NA	NA	NA	NA	NA	NA	NA	NA	NA
mannitol 2-dehydrogenase activity	NA	NA	NA	NA	NA	NA	33.3 (0.027027)	NA	NA	NA	NA	NA	NA	NA	NA	NA	NA	NA	NA	NA	NA	NA	NA	NA	NA	NA	NA	NA	NA	NA	NA	NA	NA	NA	NA	NA	NA	NA	NA	NA	NA
mannose metabolic process	NA	NA	NA	NA	NA	NA	NA	NA	NA	NA	NA	NA	NA	NA	NA	NA	NA	NA	NA	NA	NA	NA	NA	NA	NA	NA	NA	NA	4 (0.039474)	NA	NA	NA	10 (0.039474)	NA	2.2 (0.039474)	NA	NA	NA	NA	NA	NA
mating	NA	NA	NA	NA	NA	NA	NA	NA	NA	NA	6.7 (0.031913)	NA	10.5 (0.01587)	NA	NA	NA	NA	NA	NA	NA	25 (0.013283)	NA	NA	NA	NA	NA	NA	NA	5.9 (0.042436)	NA	NA	NA	NA	NA	NA	NA	NA	NA	8.3 (0.008798)	NA	NA
mature ribosome assembly	NA	NA	NA	NA	NA	NA	NA	NA	NA	NA	NA	NA	NA	NA	NA	NA	NA	NA	NA	NA	NA	NA	NA	NA	NA	NA	NA	NA	NA	5 (0.01648)	NA	NA	NA	NA	NA	NA	NA	NA	NA	NA	NA
meiosis II cell cycle process	NA	NA	NA	NA	NA	NA	NA	NA	NA	NA	NA	NA	NA	NA	NA	NA	NA	5.1 (0.038841)	NA	NA	NA	NA	NA	NA	NA	NA	NA	NA	NA	5 (0.041162)	NA	NA	NA	NA	NA	NA	NA	NA	NA	NA	NA
melatonin binding	NA	NA	NA	NA	NA	NA	NA	NA	NA	NA	NA	NA	4.3 (0.028708)	NA	NA	NA	17.9 (0.004644)	NA	NA	NA	NA	NA	NA	NA	NA	NA	NA	NA	NA	NA	NA	NA	NA	NA	NA	NA	NA	NA	NA	NA	NA
membrane biogenesis	NA	NA	NA	NA	NA	4 (0.02115)	4.3 (0.018942)	NA	NA	NA	NA	NA	NA	NA	NA	NA	NA	NA	NA	NA	6.5 (0.001275)	2.9 (0.005325)	NA	NA	NA	12.5 (0.012893)	NA	4 (0.005136)	NA	NA	NA	NA	NA	NA	NA	NA	9.4 (0.012989)	NA	NA	NA	NA
membrane disassembly	NA	NA	NA	NA	NA	NA	NA	NA	NA	NA	NA	NA	NA	NA	NA	NA	25 (0.038462)	NA	NA	NA	NA	NA	NA	NA	NA	NA	NA	NA	NA	NA	NA	NA	NA	NA	NA	NA	NA	NA	NA	NA	NA
membrane fusion	NA	NA	NA	NA	NA	NA	NA	3.2 (0.000654)	NA	NA	NA	NA	NA	NA	NA	NA	NA	NA	NA	NA	NA	NA	NA	NA	NA	NA	NA	NA	NA	NA	NA	NA	NA	NA	NA	NA	NA	NA	NA	NA	NA
membrane protein complex	NA	NA	NA	NA	NA	NA	NA	NA	NA	NA	NA	NA	NA	NA	NA	NA	NA	NA	NA	NA	NA	NA	NA	NA	NA	NA	NA	NA	NA	2.5 (2.1e-05)	NA	NA	NA	NA	NA	NA	NA	NA	NA	NA	NA
metal ion transport	NA	3.6 (0.027676)	NA	NA	NA	NA	NA	NA	2.4 (0.027676)	3.4 (0.004612)	NA	NA	NA	NA	NA	NA	NA	NA	NA	14.3 (0.000833)	NA	NA	NA	NA	NA	NA	NA	NA	NA	NA	NA	NA	NA	NA	NA	NA	NA	NA	NA	NA	NA
methylation	NA	NA	NA	NA	NA	NA	NA	NA	3 (0.017345)	NA	NA	NA	NA	NA	NA	NA	NA	NA	NA	NA	NA	NA	NA	NA	NA	NA	NA	NA	NA	NA	NA	NA	NA	NA	NA	NA	NA	NA	NA	NA	NA
methylglyoxal reductase (NADH-dependent) activity	NA	NA	NA	NA	NA	NA	NA	NA	NA	NA	NA	NA	NA	NA	NA	100 (0.040541)	NA	NA	NA	NA	NA	NA	NA	NA	NA	NA	NA	NA	NA	NA	NA	NA	NA	NA	NA	NA	NA	NA	NA	NA	NA
methyltransferase complex	NA	NA	NA	NA	NA	NA	NA	3.5 (0.038756)	NA	NA	NA	NA	NA	NA	NA	NA	NA	NA	NA	NA	NA	NA	NA	NA	NA	NA	NA	NA	NA	NA	NA	NA	NA	NA	NA	NA	NA	NA	NA	NA	NA
microbody	NA	3.4 (0.024048)	NA	NA	NA	NA	NA	NA	NA	NA	NA	NA	NA	NA	NA	NA	NA	NA	NA	NA	NA	NA	2.8 (0.00396)	NA	NA	NA	NA	2.2 (0.000139)	NA	NA	NA	NA	NA	NA	NA	NA	NA	NA	NA	NA	NA
microtubule anchoring	NA	NA	NA	NA	NA	NA	NA	NA	NA	NA	NA	NA	5.3 (0.039022)	NA	2.7 (0.019608)	NA	NA	20 (0.019608)	NA	NA	NA	11.1 (0.019608)	33.3 (0.019608)	NA	NA	NA	7.1 (0.019608)	NA	NA	NA	NA	NA	NA	NA	NA	NA	NA	NA	NA	NA	14.3 (0.039022)
microtubule organizing center attachment site	NA	NA	NA	NA	NA	NA	NA	NA	NA	NA	NA	NA	3.6 (0.02069)	NA	NA	NA	NA	NA	NA	NA	NA	NA	NA	NA	NA	NA	NA	NA	NA	NA	NA	NA	NA	NA	NA	NA	NA	NA	NA	NA	9.1 (0.041092)
mitochondria-associated ubiquitin-dependent protein catabolic process	NA	NA	NA	NA	NA	NA	NA	NA	NA	NA	NA	NA	NA	NA	NA	NA	NA	NA	NA	NA	NA	NA	NA	NA	NA	NA	NA	NA	NA	4.6 (0.035391)	NA	NA	NA	NA	NA	NA	NA	NA	NA	NA	NA
mitochondrial electron transport, NADH to ubiquinone	NA	NA	NA	NA	NA	NA	NA	NA	NA	NA	NA	NA	NA	NA	NA	NA	NA	NA	NA	NA	NA	NA	NA	NA	NA	100 (0.038462)	NA	NA	NA	NA	NA	NA	NA	NA	NA	NA	NA	NA	NA	NA	NA
mitochondrial electron transport, ubiquinol to cytochrome c	NA	NA	NA	NA	NA	NA	NA	20 (0.011037)	NA	NA	NA	NA	NA	NA	NA	NA	NA	NA	NA	NA	NA	NA	NA	NA	NA	NA	NA	NA	NA	NA	NA	NA	NA	NA	NA	NA	NA	NA	NA	NA	NA
mitochondrial inner membrane peptidase complex	NA	NA	NA	NA	NA	NA	NA	NA	NA	14.3 (0.044118)	NA	4.8 (0.044118)	3.6 (0.044118)	NA	NA	50 (0.044118)	NA	NA	NA	NA	NA	NA	NA	NA	NA	NA	4.8 (0.044118)	NA	NA	NA	NA	NA	NA	NA	NA	NA	NA	NA	NA	NA	NA
mitochondrial protein-containing complex	NA	NA	NA	NA	NA	NA	NA	2.5 (0.003215)	NA	NA	NA	NA	NA	NA	NA	NA	NA	NA	NA	NA	NA	NA	NA	NA	NA	NA	NA	NA	NA	4.1 (0.000207)	NA	NA	NA	NA	NA	NA	NA	NA	NA	NA	NA
mitochondrial respiratory chain complex assembly	NA	NA	NA	NA	NA	NA	NA	NA	NA	NA	NA	NA	NA	NA	NA	NA	NA	NA	NA	NA	NA	NA	NA	NA	NA	NA	NA	NA	NA	NA	NA	NA	NA	NA	NA	NA	NA	NA	NA	NA	4.3 (0.015655)
mitochondrial transport	NA	NA	NA	NA	NA	NA	NA	NA	NA	NA	NA	NA	NA	NA	NA	NA	NA	NA	NA	NA	NA	NA	NA	NA	NA	NA	NA	NA	NA	2.3 (0.037742)	NA	NA	NA	NA	NA	NA	NA	NA	NA	NA	NA
mitochondrion	NA	NA	NA	NA	NA	NA	NA	NA	NA	NA	NA	NA	NA	NA	NA	NA	NA	NA	NA	NA	NA	NA	NA	NA	NA	NA	NA	NA	NA	2.3 (0)	NA	NA	NA	NA	NA	NA	NA	NA	NA	NA	NA
mitochondrion organization	NA	NA	NA	NA	NA	NA	NA	NA	NA	NA	NA	NA	NA	NA	NA	NA	NA	NA	NA	NA	NA	NA	NA	NA	NA	NA	NA	NA	NA	2.5 (0.000441)	NA	NA	NA	NA	NA	NA	NA	NA	NA	NA	NA
mitotic recombination	NA	NA	NA	NA	NA	NA	NA	NA	NA	NA	NA	NA	NA	NA	NA	NA	NA	NA	NA	NA	NA	NA	NA	NA	NA	NA	NA	2.5 (0.004255)	NA	NA	NA	NA	NA	NA	NA	NA	NA	NA	NA	NA	NA
modification-dependent protein binding	NA	NA	NA	NA	NA	NA	NA	NA	NA	3.3 (0.01291)	NA	NA	NA	NA	NA	NA	NA	NA	NA	NA	NA	NA	NA	NA	NA	NA	NA	NA	NA	NA	NA	NA	NA	NA	NA	NA	NA	NA	NA	NA	NA
modified amino acid transport	NA	NA	NA	NA	NA	NA	NA	NA	NA	NA	NA	NA	NA	NA	NA	NA	NA	NA	NA	NA	NA	NA	NA	NA	NA	NA	NA	NA	NA	NA	NA	NA	4.2 (0.03562)	NA	NA	NA	NA	NA	NA	NA	NA
molecular function inhibitor activity	NA	NA	NA	NA	NA	NA	NA	15.8 (0.001271)	NA	NA	NA	NA	NA	NA	NA	NA	NA	NA	NA	NA	NA	NA	NA	NA	NA	50 (0.003914)	NA	NA	NA	6.4 (0.04049)	100 (0.021672)	NA	NA	NA	NA	NA	NA	NA	NA	NA	NA
molecular sequestering activity	NA	33.3 (0.046256)	NA	NA	NA	NA	NA	40 (0.000963)	NA	NA	NA	NA	NA	NA	NA	100 (0.020246)	NA	NA	NA	NA	NA	NA	NA	NA	NA	NA	7.1 (0.042277)	NA	NA	15.4 (0.00905)	NA	NA	NA	NA	NA	NA	25 (0.04493)	NA	NA	NA	NA
monocarboxylic acid metabolic process	NA	NA	NA	NA	NA	NA	3.2 (0.004744)	NA	NA	NA	NA	NA	NA	NA	NA	NA	NA	NA	NA	NA	NA	NA	NA	NA	NA	NA	NA	NA	NA	NA	NA	NA	NA	NA	NA	NA	NA	NA	NA	NA	2.3 (0.03149)
monocarboxylic acid transport	NA	NA	NA	NA	NA	NA	NA	NA	NA	NA	NA	NA	NA	NA	NA	NA	NA	NA	NA	NA	NA	4.9 (0.035528)	NA	NA	NA	NA	NA	NA	NA	NA	NA	NA	NA	NA	NA	NA	NA	NA	NA	NA	NA
movement of cell or subcellular component	NA	NA	NA	NA	NA	NA	NA	NA	NA	NA	NA	NA	NA	NA	NA	NA	NA	NA	NA	NA	NA	NA	NA	NA	NA	NA	NA	2.3 (0.036141)	NA	NA	NA	NA	NA	NA	NA	NA	NA	NA	NA	NA	NA
multi-organism cellular process	NA	NA	NA	NA	NA	NA	NA	5.7 (0)	NA	NA	NA	NA	NA	NA	NA	NA	NA	NA	NA	NA	NA	NA	NA	NA	NA	NA	NA	NA	NA	NA	NA	NA	NA	NA	NA	NA	NA	NA	NA	NA	NA
multi-organism reproductive process	2.5 (0.000376)	NA	NA	NA	NA	2.2 (0.03836)	3 (0.004077)	4.3 (0.010738)	NA	NA	NA	NA	NA	NA	NA	NA	NA	NA	NA	NA	3.1 (0.010738)	NA	NA	NA	NA	NA	NA	NA	NA	NA	NA	NA	NA	NA	NA	NA	NA	NA	NA	NA	NA
multivesicular body	NA	NA	NA	NA	NA	NA	NA	NA	NA	NA	NA	NA	NA	NA	NA	NA	NA	NA	NA	NA	NA	NA	NA	NA	NA	NA	NA	NA	NA	5 (0.041456)	NA	NA	NA	NA	NA	NA	NA	NA	NA	NA	NA
myosin complex	NA	NA	NA	NA	NA	NA	NA	NA	NA	NA	NA	NA	NA	NA	NA	NA	NA	NA	NA	NA	NA	NA	NA	NA	NA	NA	NA	4.7 (0.026923)	NA	NA	NA	NA	NA	NA	NA	NA	NA	NA	NA	NA	NA
nascent polypeptide-associated complex binding	NA	NA	NA	NA	NA	NA	NA	NA	NA	NA	6.7 (0.009852)	NA	NA	NA	NA	NA	NA	NA	NA	NA	NA	NA	NA	NA	NA	NA	NA	NA	NA	NA	NA	NA	NA	NA	NA	NA	NA	NA	NA	NA	NA
ncRNA transcription associated with protein coding gene TSS/TES	NA	NA	NA	NA	NA	NA	33.3 (0.016393)	NA	NA	NA	NA	NA	NA	NA	NA	NA	25 (0.032787)	NA	NA	NA	NA	NA	NA	NA	NA	NA	NA	NA	NA	NA	NA	NA	NA	NA	NA	NA	NA	NA	NA	NA	NA
negative regulation of catabolic process	NA	5.5 (0.02528)	NA	NA	NA	NA	NA	NA	NA	NA	NA	NA	NA	NA	NA	NA	NA	NA	NA	NA	3.9 (0.024637)	NA	NA	NA	NA	NA	NA	NA	NA	NA	NA	NA	NA	NA	NA	NA	NA	NA	NA	NA	NA
negative regulation of growth	NA	NA	NA	NA	NA	NA	NA	11.1 (0.03663)	NA	NA	NA	NA	NA	NA	NA	NA	NA	NA	NA	NA	NA	NA	NA	NA	NA	NA	NA	NA	NA	NA	NA	NA	NA	NA	NA	NA	NA	NA	NA	NA	NA
negative regulation of molecular function	NA	3.3 (0.034806)	NA	NA	NA	NA	NA	2.9 (0.008422)	NA	NA	NA	NA	NA	NA	NA	NA	NA	NA	NA	NA	2.9 (0.000685)	NA	NA	NA	NA	8.7 (0.01139)	NA	NA	NA	3 (0.001098)	NA	NA	NA	NA	NA	NA	NA	NA	NA	NA	3.7 (0.000156)
nitrogen cycle metabolic process	NA	NA	NA	NA	NA	NA	NA	NA	NA	6.7 (0.045253)	NA	NA	NA	NA	NA	NA	NA	NA	NA	NA	NA	NA	NA	NA	NA	NA	NA	5.4 (0.026866)	NA	NA	100 (0.011974)	NA	4.8 (0.037508)	NA	NA	33.3 (0.037508)	NA	NA	NA	NA	NA
nitrogen utilization	NA	NA	NA	NA	NA	NA	NA	NA	NA	NA	NA	NA	NA	NA	NA	NA	NA	NA	NA	NA	2.4 (0.024343)	NA	NA	NA	NA	NA	NA	NA	NA	NA	NA	NA	NA	NA	NA	NA	NA	NA	NA	NA	NA
nuclear periphery	NA	NA	NA	NA	NA	NA	NA	2.6 (0.040241)	NA	NA	NA	NA	NA	2.5 (0.023326)	NA	NA	NA	NA	NA	NA	NA	NA	NA	NA	NA	NA	NA	NA	NA	NA	NA	NA	NA	NA	NA	NA	NA	NA	NA	NA	NA
nucleobase metabolic process	NA	NA	NA	NA	NA	NA	NA	NA	NA	NA	NA	NA	NA	NA	NA	NA	NA	NA	NA	NA	NA	NA	NA	NA	NA	NA	NA	NA	NA	NA	NA	NA	NA	21.4 (0.02733)	NA	NA	NA	NA	NA	NA	NA
nucleobase-containing compound kinase activity	NA	NA	NA	NA	NA	NA	NA	NA	NA	NA	NA	NA	NA	NA	NA	NA	NA	NA	NA	NA	NA	NA	NA	NA	NA	NA	NA	NA	NA	NA	100 (0.041522)	NA	NA	NA	NA	NA	NA	NA	NA	NA	NA
nucleobase-containing compound transport	NA	NA	NA	NA	NA	NA	NA	NA	2.1 (0.030617)	NA	NA	NA	NA	NA	NA	NA	NA	NA	NA	NA	NA	NA	NA	NA	NA	NA	NA	NA	NA	NA	NA	NA	NA	NA	NA	NA	NA	NA	NA	NA	NA
nucleobase-containing small molecule metabolic process	NA	NA	NA	NA	NA	NA	NA	NA	NA	NA	NA	NA	NA	NA	NA	NA	NA	NA	NA	NA	NA	NA	NA	NA	NA	NA	NA	NA	NA	3.2 (0.00012)	NA	NA	NA	NA	NA	NA	NA	NA	NA	NA	NA
nucleoid	NA	NA	NA	NA	NA	NA	NA	NA	NA	NA	NA	NA	NA	NA	NA	NA	NA	NA	NA	NA	NA	NA	NA	NA	NA	NA	NA	NA	NA	5.3 (0.000213)	NA	NA	NA	NA	NA	NA	NA	NA	NA	NA	NA
nucleolus	NA	NA	NA	NA	NA	NA	NA	NA	NA	NA	NA	NA	NA	NA	NA	NA	NA	NA	NA	NA	NA	NA	NA	NA	NA	NA	NA	NA	NA	NA	NA	NA	NA	5.4 (0.021938)	NA	NA	2.8 (0.014275)	NA	NA	NA	NA
nucleoside diphosphate metabolic process	NA	NA	NA	NA	NA	NA	NA	NA	NA	NA	NA	NA	NA	NA	NA	NA	7.5 (1.1e-05)	NA	NA	NA	NA	NA	NA	NA	NA	NA	NA	NA	NA	NA	NA	NA	NA	NA	NA	NA	NA	NA	NA	NA	NA
nucleoside monophosphate metabolic process	NA	NA	NA	NA	NA	NA	NA	NA	NA	NA	NA	NA	NA	NA	NA	NA	NA	NA	NA	NA	NA	NA	NA	NA	NA	NA	NA	NA	NA	NA	NA	NA	NA	20 (0.010988)	NA	NA	NA	NA	NA	NA	NA
nucleoside triphosphate metabolic process	NA	NA	NA	NA	NA	NA	NA	6.6 (0.000807)	NA	NA	NA	NA	NA	NA	NA	NA	NA	NA	NA	NA	NA	NA	NA	NA	NA	NA	NA	NA	NA	8.8 (0)	NA	NA	NA	NA	NA	NA	NA	NA	NA	NA	NA
nucleoside-triphosphate diphosphatase activity	NA	NA	NA	NA	NA	NA	NA	NA	NA	NA	NA	NA	NA	NA	NA	NA	NA	6.7 (0.024071)	NA	NA	NA	NA	NA	NA	NA	33.3 (0.035925)	NA	NA	NA	NA	NA	33.3 (0.012097)	NA	NA	NA	NA	NA	NA	NA	NA	NA
nucleotide phosphorylation	NA	NA	NA	NA	NA	NA	NA	4.2 (0.031981)	NA	NA	NA	NA	NA	NA	NA	21.4 (0.000539)	8.9 (1e-06)	NA	NA	NA	NA	NA	NA	NA	NA	NA	NA	NA	NA	NA	NA	NA	NA	NA	NA	NA	NA	NA	NA	NA	NA
nucleotide-excision repair	NA	NA	NA	NA	NA	NA	NA	NA	4 (0.014965)	NA	NA	NA	NA	NA	NA	NA	NA	NA	NA	NA	NA	NA	NA	NA	NA	NA	NA	NA	NA	NA	NA	NA	NA	NA	NA	NA	NA	NA	NA	NA	NA
nucleotide-sugar metabolic process	NA	NA	NA	NA	NA	NA	NA	NA	NA	NA	NA	NA	NA	NA	NA	NA	NA	NA	NA	NA	NA	NA	NA	NA	NA	NA	2.2 (0.014718)	NA	NA	NA	NA	NA	NA	NA	NA	NA	NA	NA	NA	NA	NA
nucleus	NA	NA	NA	NA	NA	NA	NA	NA	NA	NA	NA	NA	NA	NA	NA	NA	NA	NA	NA	NA	NA	NA	NA	NA	NA	NA	NA	NA	NA	NA	NA	NA	NA	2.1 (0.002841)	NA	NA	NA	NA	NA	NA	NA
nucleus localization	NA	NA	NA	NA	NA	NA	NA	4.8 (0.004911)	NA	NA	NA	NA	NA	NA	NA	NA	NA	NA	NA	NA	NA	NA	NA	NA	NA	NA	NA	2.8 (0.034899)	NA	NA	NA	NA	NA	NA	NA	NA	NA	NA	NA	NA	NA
odorant binding	25 (0.016213)	NA	NA	6.7 (0.038955)	7.1 (0.040949)	16.7 (0.028286)	16.7 (0.032961)	NA	NA	NA	NA	NA	NA	NA	NA	NA	NA	NA	NA	NA	NA	11.1 (0.012172)	NA	NA	NA	NA	NA	NA	NA	NA	NA	NA	14.3 (0.011498)	NA	NA	NA	25 (0.04493)	NA	4.2 (0.048242)	NA	NA
oligosaccharide metabolic process	NA	NA	NA	NA	NA	NA	NA	NA	NA	NA	NA	NA	NA	NA	NA	NA	NA	NA	NA	NA	7.1 (0.00625)	3.2 (0.021038)	NA	NA	NA	27.3 (0.031548)	NA	NA	NA	7.5 (0.000891)	NA	NA	NA	NA	NA	NA	NA	NA	NA	NA	7.6 (0.049343)
one-carbon metabolic process	NA	NA	NA	NA	NA	NA	NA	NA	NA	NA	NA	NA	NA	NA	NA	44.4 (0.000106)	NA	NA	NA	NA	NA	NA	NA	NA	NA	33.3 (0.002959)	NA	NA	NA	NA	NA	NA	NA	25 (0.018192)	NA	NA	NA	NA	NA	66.7 (0.010923)	NA
organelle envelope lumen	NA	NA	NA	NA	NA	NA	NA	NA	NA	NA	NA	NA	NA	NA	NA	NA	NA	NA	NA	NA	NA	NA	NA	NA	NA	NA	NA	NA	NA	NA	NA	NA	NA	NA	NA	NA	NA	NA	NA	NA	3.1 (0.035981)
organelle fission	NA	NA	NA	NA	NA	NA	NA	NA	NA	NA	NA	NA	NA	NA	NA	3 (0.009066)	NA	NA	NA	NA	NA	NA	NA	NA	NA	NA	NA	NA	NA	NA	NA	NA	NA	NA	NA	NA	NA	NA	NA	NA	NA
organelle fusion	NA	NA	NA	NA	NA	NA	NA	NA	NA	NA	NA	NA	NA	NA	NA	NA	NA	NA	NA	NA	NA	NA	NA	NA	NA	4.2 (0.005496)	NA	NA	NA	NA	NA	NA	NA	NA	NA	NA	NA	NA	NA	NA	NA
organelle inner membrane	NA	NA	NA	NA	NA	NA	NA	NA	NA	NA	NA	NA	NA	NA	NA	NA	NA	NA	NA	NA	NA	NA	NA	NA	NA	NA	NA	NA	NA	3.1 (0.000216)	NA	NA	NA	NA	NA	NA	NA	NA	NA	NA	NA
organelle localization	NA	NA	NA	NA	NA	NA	NA	NA	NA	NA	NA	NA	NA	NA	NA	3.6 (0.019736)	NA	NA	NA	NA	NA	NA	NA	NA	NA	NA	NA	NA	NA	NA	NA	NA	NA	NA	NA	NA	NA	NA	NA	NA	NA
organic acid binding	NA	NA	NA	NA	NA	NA	NA	NA	NA	7.4 (0.009019)	NA	NA	NA	NA	NA	50 (8.2e-05)	NA	NA	NA	NA	NA	NA	NA	NA	NA	50 (8.2e-05)	NA	NA	NA	NA	NA	NA	NA	NA	NA	NA	NA	NA	NA	NA	NA
organic acid metabolic process	NA	NA	NA	NA	NA	NA	NA	NA	NA	NA	NA	NA	NA	NA	NA	4.8 (0.040928)	2.8 (0.004928)	NA	NA	NA	NA	NA	NA	NA	NA	NA	NA	NA	NA	NA	NA	NA	NA	NA	NA	NA	NA	NA	NA	NA	NA
organic acid transport	NA	NA	NA	NA	NA	NA	NA	NA	NA	NA	NA	NA	NA	2.5 (0.003509)	NA	NA	2.7 (0.001985)	NA	NA	NA	NA	NA	NA	NA	NA	NA	NA	NA	NA	NA	NA	NA	NA	NA	NA	NA	NA	NA	NA	NA	NA
organic cyclic compound binding	NA	NA	NA	NA	NA	NA	NA	NA	NA	NA	NA	NA	NA	NA	NA	NA	NA	NA	NA	NA	NA	NA	NA	NA	NA	NA	NA	NA	NA	NA	NA	NA	NA	NA	NA	NA	NA	NA	NA	3 (0.029333)	NA
organic hydroxy compound metabolic process	NA	NA	NA	NA	NA	NA	2.3 (0.001307)	NA	NA	NA	NA	NA	NA	NA	NA	NA	3 (7.5e-05)	NA	NA	NA	NA	NA	NA	7.3 (0.004777)	NA	NA	NA	NA	NA	NA	NA	NA	NA	NA	NA	4.9 (0.040795)	NA	NA	NA	NA	NA
organic hydroxy compound transmembrane transporter activity	NA	NA	NA	NA	NA	NA	NA	NA	NA	NA	NA	NA	NA	NA	NA	NA	8.6 (0.02509)	NA	NA	NA	NA	NA	NA	NA	NA	NA	NA	NA	NA	NA	NA	NA	NA	NA	NA	NA	NA	NA	NA	NA	NA
organic hydroxy compound transport	NA	NA	NA	NA	NA	NA	NA	NA	NA	NA	NA	NA	NA	NA	NA	NA	3.8 (0.002348)	2.8 (0.009354)	NA	NA	NA	NA	NA	NA	NA	NA	NA	NA	NA	NA	NA	9.1 (0.012331)	NA	NA	NA	NA	NA	NA	NA	NA	NA
ornithine metabolic process	17.6 (0.009084)	NA	NA	NA	NA	NA	NA	NA	NA	NA	NA	NA	NA	NA	NA	NA	NA	NA	NA	NA	NA	NA	NA	NA	NA	NA	NA	NA	NA	NA	NA	NA	NA	NA	NA	NA	12.5 (0.021399)	NA	NA	NA	NA
ornithine(lysine) transaminase activity	NA	NA	NA	NA	NA	NA	NA	NA	NA	NA	NA	NA	NA	NA	NA	NA	NA	NA	NA	100 (0.045455)	NA	NA	NA	NA	NA	NA	NA	NA	NA	NA	NA	NA	NA	NA	NA	NA	50 (0.045455)	NA	NA	NA	NA
ornithine-oxo-acid transaminase activity	NA	NA	NA	NA	NA	NA	NA	NA	NA	NA	NA	NA	NA	NA	NA	NA	NA	NA	NA	100 (0.045455)	NA	NA	NA	NA	NA	NA	NA	NA	NA	NA	NA	NA	NA	NA	NA	NA	50 (0.045455)	NA	NA	NA	NA
outer membrane	NA	NA	NA	NA	NA	NA	NA	NA	NA	NA	NA	NA	NA	NA	NA	NA	2.1 (0.043107)	NA	NA	NA	NA	NA	NA	NA	NA	NA	NA	NA	NA	NA	NA	NA	NA	NA	NA	NA	NA	NA	NA	NA	NA
oxazole or thiazole metabolic process	NA	NA	NA	NA	NA	NA	33.3 (0.014108)	NA	NA	NA	NA	NA	NA	NA	5.6 (0.024831)	NA	25 (0.023702)	NA	NA	NA	25 (0.025959)	NA	NA	NA	NA	NA	NA	NA	NA	NA	NA	NA	33.3 (0.007901)	NA	NA	NA	NA	NA	8.3 (0.022573)	NA	NA
oxidoreductase activity	NA	NA	NA	NA	NA	NA	NA	2.2 (0.001482)	NA	NA	NA	NA	NA	NA	NA	5.1 (0.000543)	3.4 (0)	NA	NA	NA	NA	NA	NA	NA	NA	NA	NA	NA	NA	2.8 (0)	NA	NA	NA	NA	NA	NA	NA	NA	NA	NA	NA
oxidoreductase activity, acting on CH or CH2 groups	NA	NA	NA	NA	NA	NA	NA	NA	NA	NA	NA	NA	4.3 (0.039356)	NA	2.2 (0.046418)	NA	NA	NA	NA	NA	NA	NA	NA	NA	NA	NA	NA	NA	NA	NA	NA	NA	NA	NA	NA	NA	NA	NA	NA	NA	NA
oxidoreductase activity, acting on NAD(P)H	NA	NA	NA	NA	NA	NA	NA	NA	NA	NA	NA	NA	NA	NA	NA	NA	8.2 (0.009943)	NA	NA	NA	NA	NA	NA	NA	NA	NA	NA	3.2 (0.004568)	NA	NA	NA	NA	NA	NA	NA	NA	NA	NA	NA	NA	NA
oxidoreductase activity, acting on a heme group of donors	NA	NA	NA	NA	NA	NA	NA	NA	NA	NA	NA	NA	NA	NA	NA	NA	NA	NA	NA	NA	NA	NA	NA	NA	NA	NA	NA	NA	NA	12.8 (0.000224)	NA	NA	NA	NA	NA	NA	NA	NA	NA	NA	NA
oxidoreductase activity, acting on diphenols and related substances as donors	NA	NA	NA	NA	NA	NA	NA	29.2 (0)	NA	NA	NA	NA	NA	NA	NA	NA	NA	NA	NA	NA	NA	NA	NA	NA	NA	NA	NA	NA	NA	15 (0)	NA	NA	NA	NA	NA	NA	NA	NA	NA	NA	NA
oxidoreductase activity, acting on metal ions	NA	NA	NA	NA	NA	NA	NA	NA	NA	9.4 (0.001651)	NA	3.3 (0.003777)	NA	5.6 (0.040373)	NA	NA	NA	NA	NA	25 (0.001509)	NA	NA	NA	NA	NA	NA	4.4 (0.000298)	NA	NA	NA	NA	NA	4.4 (0.02823)	NA	NA	NA	7.7 (0.014079)	NA	NA	NA	NA
oxidoreductase activity, acting on other nitrogenous compounds as donors	NA	NA	NA	NA	NA	NA	NA	18.2 (0.018473)	NA	NA	NA	NA	NA	NA	NA	NA	NA	NA	NA	NA	NA	NA	NA	NA	NA	NA	NA	NA	NA	NA	NA	NA	NA	NA	NA	NA	NA	NA	NA	NA	NA
oxidoreductase activity, acting on peroxide as acceptor	NA	NA	NA	NA	NA	NA	NA	NA	NA	NA	NA	NA	NA	NA	NA	NA	NA	NA	NA	NA	NA	NA	NA	NA	NA	NA	NA	NA	NA	NA	50 (0.046584)	NA	NA	NA	NA	NA	NA	NA	NA	NA	NA
oxidoreductase activity, acting on single donors with incorporation of molecular oxygen	NA	NA	NA	NA	NA	NA	NA	NA	NA	NA	NA	NA	NA	NA	NA	NA	NA	NA	NA	NA	NA	NA	NA	NA	NA	NA	NA	NA	NA	NA	NA	NA	NA	NA	NA	50 (0.03692)	NA	NA	NA	NA	NA
oxidoreductase activity, acting on the CH-CH group of donors	NA	NA	NA	2.5 (0.006531)	2.7 (0.008713)	NA	NA	NA	NA	NA	NA	NA	NA	NA	NA	NA	NA	NA	NA	NA	NA	NA	6.7 (0.031502)	NA	NA	NA	NA	NA	NA	NA	NA	NA	NA	NA	NA	NA	NA	NA	NA	NA	NA
oxidoreductase activity, acting on the CH-CH group of donors, oxygen as acceptor	NA	NA	NA	NA	NA	NA	NA	NA	NA	NA	NA	NA	NA	NA	NA	NA	16.7 (0.024957)	NA	NA	NA	NA	NA	NA	NA	NA	NA	NA	NA	NA	NA	NA	NA	NA	NA	NA	NA	NA	NA	NA	NA	NA
oxidoreductase activity, acting on the CH-CH group of donors, quinone or related compound as acceptor	NA	NA	NA	NA	NA	NA	NA	NA	NA	NA	NA	NA	NA	NA	NA	NA	NA	NA	NA	NA	NA	NA	NA	NA	NA	NA	NA	NA	NA	8.5 (0.023908)	NA	NA	NA	NA	NA	NA	NA	NA	NA	NA	NA
oxidoreductase activity, acting on the CH-OH group of donors, cytochrome as acceptor	NA	NA	NA	NA	NA	NA	NA	NA	NA	NA	NA	NA	NA	NA	NA	NA	12.5 (0.049002)	NA	NA	NA	NA	NA	NA	NA	NA	NA	NA	NA	NA	NA	NA	NA	NA	NA	NA	NA	NA	NA	NA	NA	14.3 (0.027218)
oxidoreductase activity, acting on the CH-OH group of donors, quinone or similar compound as acceptor	NA	NA	NA	NA	NA	NA	NA	NA	NA	NA	NA	NA	NA	NA	NA	NA	NA	NA	NA	NA	NA	NA	NA	NA	NA	100 (0.012658)	NA	NA	NA	NA	NA	NA	NA	NA	NA	NA	NA	NA	NA	NA	NA
oxidoreductase activity, acting on the aldehyde or oxo group of donors	NA	NA	NA	NA	NA	NA	NA	NA	NA	NA	NA	NA	NA	NA	NA	NA	5.9 (0.035367)	NA	NA	NA	NA	NA	NA	NA	NA	NA	NA	NA	NA	NA	NA	NA	NA	NA	NA	NA	NA	NA	NA	NA	NA
oxidoreductase complex	NA	NA	NA	NA	NA	2.5 (0.011585)	NA	8.5 (0)	NA	NA	NA	NA	NA	NA	NA	9.5 (0.028812)	3.3 (0.003956)	NA	NA	8.7 (0.009306)	NA	NA	NA	NA	NA	20 (0.000289)	NA	NA	NA	8 (0)	NA	NA	NA	NA	NA	NA	NA	NA	NA	NA	NA
oxidoreduction-driven active transmembrane transporter activity	NA	NA	NA	NA	NA	NA	NA	15.2 (2.8e-05)	NA	NA	NA	NA	NA	NA	NA	NA	NA	NA	NA	NA	NA	NA	NA	NA	NA	NA	NA	NA	NA	14 (0)	NA	NA	NA	NA	NA	NA	NA	NA	NA	NA	4.9 (0.015568)
palmitoyltransferase complex	NA	NA	NA	NA	NA	NA	NA	NA	NA	NA	NA	NA	NA	NA	NA	NA	NA	NA	NA	NA	NA	NA	NA	NA	NA	NA	NA	NA	NA	NA	NA	NA	NA	NA	NA	25 (0.041074)	NA	NA	NA	NA	NA
passive transmembrane transporter activity	NA	NA	NA	NA	NA	NA	NA	NA	NA	NA	NA	NA	NA	NA	NA	NA	NA	NA	NA	NA	NA	NA	NA	NA	NA	NA	NA	NA	NA	5.9 (0.001447)	NA	NA	NA	NA	NA	NA	NA	NA	NA	NA	NA
peptidase complex	NA	NA	NA	NA	NA	NA	NA	NA	3.4 (0.023125)	NA	NA	NA	NA	NA	NA	NA	NA	NA	NA	NA	NA	NA	NA	NA	NA	NA	NA	NA	NA	NA	NA	NA	NA	NA	NA	NA	NA	NA	NA	NA	NA
peptidyl-cysteine modification	NA	NA	NA	NA	NA	NA	NA	NA	NA	NA	NA	NA	NA	NA	NA	NA	NA	NA	NA	NA	NA	NA	NA	NA	NA	NA	NA	NA	NA	NA	NA	NA	NA	NA	NA	33.3 (0.028455)	NA	NA	NA	NA	NA
peptidyl-lysine modification	NA	NA	NA	NA	NA	NA	NA	NA	2.6 (0.028067)	NA	NA	NA	NA	NA	NA	NA	NA	NA	NA	NA	NA	NA	NA	NA	NA	NA	NA	NA	NA	NA	NA	NA	NA	NA	NA	NA	NA	NA	NA	NA	NA
peptidyl-serine acetylation	NA	NA	NA	NA	NA	16.7 (0.027397)	NA	20 (0.027397)	NA	NA	NA	NA	NA	NA	NA	NA	NA	NA	NA	NA	NA	NA	NA	NA	NA	NA	NA	NA	NA	NA	NA	NA	NA	NA	NA	NA	NA	NA	NA	NA	NA
peptidyl-threonine dephosphorylation	NA	NA	NA	NA	NA	NA	NA	NA	NA	NA	NA	NA	NA	NA	NA	NA	16.7 (0.010432)	NA	NA	NA	NA	NA	NA	NA	NA	NA	NA	NA	NA	NA	NA	NA	NA	NA	NA	NA	NA	NA	NA	NA	18.2 (0.010432)
periplasmic space	NA	NA	NA	NA	NA	NA	NA	NA	NA	NA	NA	NA	3 (0.029557)	NA	NA	NA	7.4 (0.032167)	NA	NA	NA	NA	NA	NA	NA	NA	NA	NA	NA	NA	NA	NA	NA	NA	NA	NA	NA	NA	NA	NA	NA	NA
peroxisome targeting sequence binding	NA	NA	NA	NA	NA	NA	NA	NA	NA	NA	NA	NA	NA	NA	NA	NA	NA	NA	NA	NA	NA	NA	NA	NA	NA	NA	NA	NA	NA	10 (0.02162)	NA	NA	NA	NA	NA	NA	NA	NA	NA	NA	NA
phagophore	NA	NA	NA	NA	NA	NA	NA	NA	NA	NA	NA	NA	NA	NA	NA	NA	NA	NA	NA	NA	NA	NA	NA	NA	NA	NA	NA	4.7 (0.033659)	NA	NA	NA	NA	NA	NA	NA	NA	NA	NA	NA	NA	NA
phagophore assembly site	NA	NA	NA	NA	NA	NA	NA	NA	NA	NA	NA	NA	NA	NA	NA	NA	NA	NA	NA	NA	NA	NA	NA	NA	NA	NA	NA	2.3 (0.009526)	NA	NA	NA	NA	NA	NA	NA	NA	NA	NA	NA	NA	NA
phenylpyruvate decarboxylase activity	NA	NA	NA	6.9 (0.023715)	NA	NA	NA	NA	NA	NA	6.7 (0.023715)	NA	NA	NA	2.7 (0.023715)	NA	NA	NA	NA	NA	NA	11.8 (0.023715)	NA	NA	NA	NA	NA	NA	NA	NA	NA	NA	NA	NA	NA	NA	NA	NA	NA	NA	NA
pheromone activity	NA	NA	NA	NA	NA	NA	NA	NA	NA	NA	NA	NA	NA	NA	NA	NA	NA	NA	NA	NA	20 (0.047619)	NA	NA	NA	NA	NA	NA	NA	NA	NA	NA	NA	NA	NA	NA	NA	NA	NA	NA	NA	NA
phosphatase binding	NA	NA	NA	NA	NA	NA	NA	NA	NA	NA	NA	NA	NA	NA	NA	NA	NA	NA	NA	NA	NA	NA	NA	NA	NA	NA	NA	NA	NA	3.8 (0.001708)	NA	NA	NA	NA	NA	NA	NA	NA	NA	NA	NA
phosphatase complex	NA	NA	NA	NA	NA	NA	3.2 (0.013904)	NA	NA	NA	NA	NA	NA	NA	NA	NA	NA	3.5 (0.009455)	NA	NA	NA	NA	NA	NA	NA	NA	NA	3.7 (0.001121)	NA	NA	NA	NA	NA	NA	NA	NA	NA	NA	NA	NA	NA
phosphatidic acid metabolic process	NA	NA	NA	NA	NA	NA	NA	NA	NA	NA	NA	NA	2.7 (0.011001)	NA	NA	NA	NA	NA	NA	NA	NA	NA	NA	NA	NA	NA	NA	NA	NA	NA	NA	NA	NA	NA	NA	NA	NA	NA	NA	NA	NA
phosphatidyl-N-dimethylethanolamine N-methyltransferase activity	NA	NA	NA	NA	NA	NA	NA	NA	NA	NA	NA	NA	NA	NA	NA	NA	25 (0.02381)	NA	NA	NA	NA	NA	NA	NA	NA	NA	NA	NA	NA	NA	NA	NA	NA	NA	NA	NA	NA	NA	NA	NA	NA
phosphatidyl-N-methylethanolamine N-methyltransferase activity	NA	NA	NA	NA	NA	NA	NA	NA	NA	NA	NA	NA	NA	NA	NA	NA	25 (0.02381)	NA	NA	NA	NA	NA	NA	NA	NA	NA	NA	NA	NA	NA	NA	NA	NA	NA	NA	NA	NA	NA	NA	NA	NA
phosphatidylethanolamine N-methyltransferase activity	NA	NA	NA	NA	NA	NA	NA	NA	NA	NA	NA	NA	NA	NA	NA	NA	12.5 (0.047619)	NA	NA	NA	NA	NA	NA	NA	NA	NA	NA	NA	NA	NA	NA	NA	NA	NA	NA	NA	NA	NA	NA	NA	NA
phosphatidylinositol acyl-chain remodeling	NA	NA	NA	NA	NA	NA	NA	NA	NA	NA	6.7 (0.026667)	NA	NA	NA	2.7 (0.026667)	NA	NA	NA	NA	NA	NA	NA	NA	NA	NA	NA	NA	NA	NA	NA	NA	NA	NA	NA	NA	NA	NA	NA	NA	NA	NA
phosphoenolpyruvate carboxykinase activity	NA	NA	NA	NA	NA	NA	NA	NA	NA	NA	NA	NA	NA	NA	NA	NA	NA	33.3 (0.043478)	NA	NA	NA	NA	NA	NA	NA	NA	NA	NA	NA	NA	NA	NA	NA	NA	NA	NA	NA	NA	NA	NA	NA
phosphoglycerate mutase activity	NA	NA	NA	NA	NA	NA	NA	NA	NA	NA	NA	NA	NA	NA	NA	NA	9.7 (0.033935)	NA	NA	NA	NA	NA	NA	NA	NA	NA	NA	NA	NA	NA	NA	NA	NA	NA	NA	NA	NA	NA	NA	NA	NA
phosphoprotein binding	NA	NA	NA	NA	NA	NA	NA	NA	12.5 (0.007661)	NA	NA	NA	NA	NA	NA	NA	NA	NA	NA	NA	NA	NA	NA	NA	NA	NA	NA	NA	NA	NA	NA	NA	NA	NA	NA	NA	NA	NA	NA	NA	NA
phosphopyruvate hydratase activity	NA	NA	NA	NA	NA	NA	NA	NA	NA	NA	NA	NA	NA	NA	NA	NA	9.7 (0.007743)	NA	NA	NA	NA	NA	NA	NA	NA	NA	NA	NA	NA	NA	NA	NA	NA	NA	NA	NA	NA	NA	NA	NA	NA
phosphopyruvate hydratase complex	NA	NA	NA	NA	NA	NA	NA	NA	NA	NA	NA	NA	NA	NA	NA	NA	25 (0.001941)	NA	NA	NA	NA	NA	NA	NA	NA	NA	NA	NA	NA	NA	NA	NA	NA	NA	NA	NA	NA	NA	NA	NA	NA
phosphorus metabolic process	NA	NA	NA	NA	NA	NA	NA	NA	NA	NA	NA	NA	NA	NA	NA	NA	NA	NA	NA	NA	NA	NA	NA	NA	NA	3.2 (0.003786)	NA	NA	NA	NA	NA	NA	NA	NA	NA	NA	NA	NA	NA	NA	NA
phosphorylation of RNA polymerase II C-terminal domain serine 2 residues	NA	NA	NA	NA	NA	NA	NA	NA	25 (0.006494)	NA	NA	NA	NA	NA	NA	NA	NA	NA	NA	NA	NA	NA	NA	NA	NA	NA	NA	NA	NA	NA	NA	NA	NA	NA	NA	NA	NA	NA	NA	NA	NA
phosphotransferase activity, carboxyl group as acceptor	NA	NA	NA	NA	NA	NA	NA	3.9 (0.018083)	NA	NA	NA	NA	NA	NA	NA	20 (0.000285)	8.3 (1e-06)	NA	NA	NA	NA	NA	4.3 (0.004486)	NA	NA	NA	NA	NA	NA	NA	NA	NA	NA	NA	NA	NA	NA	NA	NA	NA	NA
phosphotransferase activity, phosphate group as acceptor	NA	NA	NA	NA	NA	NA	NA	NA	NA	NA	NA	NA	NA	NA	NA	NA	NA	NA	NA	NA	NA	NA	NA	NA	NA	NA	NA	NA	NA	NA	50 (0.03163)	NA	NA	NA	NA	NA	NA	NA	NA	NA	NA
pigment catabolic process	NA	NA	NA	NA	NA	NA	NA	NA	NA	NA	NA	NA	NA	NA	NA	NA	NA	NA	NA	NA	25 (0.037037)	NA	NA	NA	NA	NA	NA	NA	NA	NA	NA	NA	NA	NA	NA	NA	NA	NA	NA	NA	NA
plasma membrane organization	NA	NA	NA	NA	NA	NA	NA	5.7 (0.000308)	NA	NA	NA	NA	NA	NA	NA	NA	NA	NA	NA	NA	NA	NA	NA	NA	NA	NA	NA	NA	NA	NA	NA	NA	NA	NA	NA	NA	NA	NA	NA	NA	NA
plasma membrane protein complex	NA	NA	NA	NA	NA	NA	NA	4.3 (0.018551)	NA	4.8 (0.018551)	NA	NA	NA	NA	NA	NA	3 (0.006504)	NA	NA	20 (0.006504)	3 (0.03528)	NA	NA	NA	NA	NA	NA	NA	NA	NA	NA	NA	NA	NA	NA	NA	NA	NA	NA	NA	NA
plasma membrane selenite transport	NA	NA	NA	NA	NA	NA	NA	NA	NA	NA	NA	NA	NA	NA	NA	NA	NA	NA	50 (0.031579)	NA	NA	NA	NA	NA	NA	NA	NA	NA	NA	NA	NA	NA	NA	NA	NA	NA	NA	NA	NA	NA	NA
polyamine homeostasis	NA	NA	NA	NA	NA	NA	NA	NA	NA	NA	NA	14.3 (0.039024)	NA	NA	NA	NA	NA	NA	NA	NA	NA	NA	NA	NA	NA	NA	NA	NA	NA	NA	NA	NA	NA	NA	NA	NA	NA	NA	NA	NA	NA
polyamine transport	NA	NA	NA	NA	NA	NA	NA	NA	NA	NA	NA	NA	NA	NA	NA	NA	4 (0.041442)	NA	10 (0.033203)	NA	NA	NA	9.1 (0.003736)	NA	NA	NA	NA	NA	NA	NA	NA	NA	NA	NA	NA	NA	NA	NA	NA	NA	NA
polyphosphate metabolic process	NA	NA	NA	NA	NA	NA	NA	NA	11.8 (0.005268)	NA	NA	NA	NA	NA	NA	NA	NA	8.3 (0.048808)	NA	NA	NA	NA	NA	NA	NA	42.9 (0.003317)	NA	NA	NA	NA	NA	NA	NA	NA	NA	NA	NA	NA	NA	NA	NA
polysaccharide binding	NA	NA	NA	NA	NA	NA	NA	NA	NA	NA	NA	NA	NA	NA	4.1 (0.004737)	NA	NA	NA	NA	NA	NA	NA	NA	NA	NA	NA	7.1 (0.045177)	12 (0.011477)	NA	11.1 (0.022222)	NA	NA	NA	NA	NA	NA	NA	NA	4.3 (0.045177)	NA	NA
polysaccharide localization	NA	NA	NA	NA	NA	NA	NA	NA	NA	NA	NA	NA	NA	NA	NA	NA	NA	NA	100 (0.004398)	NA	12.5 (0.049992)	NA	NA	NA	NA	NA	NA	NA	NA	NA	NA	NA	NA	NA	NA	NA	NA	NA	NA	NA	28.6 (0.001202)
positive regulation of reproductive process	NA	NA	NA	NA	NA	NA	NA	NA	NA	NA	NA	NA	NA	NA	NA	NA	NA	NA	NA	NA	4.5 (0.033697)	NA	NA	NA	NA	NA	NA	NA	NA	NA	NA	NA	NA	NA	NA	NA	NA	NA	NA	NA	NA
positive regulation of transcription from RNA polymerase II promoter involved in cellular response to chemical stimulus	NA	NA	NA	NA	NA	NA	NA	NA	NA	NA	NA	NA	NA	NA	NA	NA	NA	NA	NA	NA	NA	NA	NA	NA	NA	NA	NA	NA	NA	NA	NA	NA	3.6 (0.043243)	NA	NA	NA	NA	NA	NA	NA	NA
pre-snoRNP complex	NA	NA	NA	NA	NA	NA	NA	NA	NA	NA	NA	NA	NA	NA	NA	NA	NA	NA	NA	NA	12.5 (0.03033)	NA	NA	NA	NA	NA	NA	NA	NA	NA	NA	NA	NA	NA	NA	NA	NA	NA	NA	NA	NA
preribosome	NA	NA	3.7 (0.03447)	NA	NA	NA	NA	NA	NA	NA	NA	NA	NA	NA	NA	NA	NA	NA	NA	NA	NA	NA	NA	NA	NA	NA	NA	NA	NA	NA	NA	NA	NA	NA	NA	NA	3.1 (0.024918)	NA	NA	NA	NA
preribosome, large subunit precursor	NA	NA	10 (0.017205)	NA	NA	NA	NA	NA	NA	NA	NA	NA	NA	NA	NA	NA	NA	NA	NA	NA	NA	NA	NA	NA	NA	NA	NA	NA	NA	NA	NA	NA	NA	14.8 (0.017205)	NA	NA	NA	NA	NA	NA	NA
prespliceosome	NA	11.3 (0.036809)	NA	NA	NA	3 (0.035834)	NA	NA	NA	NA	NA	NA	NA	NA	NA	NA	NA	NA	NA	NA	NA	NA	NA	NA	NA	NA	NA	NA	NA	NA	NA	NA	NA	NA	NA	NA	NA	NA	NA	NA	NA
primary active transmembrane transporter activity	NA	NA	NA	NA	NA	NA	NA	NA	NA	NA	NA	NA	NA	NA	NA	NA	NA	NA	NA	NA	NA	NA	NA	NA	NA	NA	NA	NA	NA	5.3 (0.010196)	NA	NA	NA	NA	NA	NA	NA	NA	NA	NA	NA
primary alcohol metabolic process	NA	NA	NA	NA	NA	NA	NA	NA	NA	NA	NA	NA	NA	NA	NA	NA	NA	NA	NA	NA	4.8 (0.045349)	NA	NA	NA	NA	NA	NA	NA	NA	NA	NA	NA	NA	NA	NA	NA	NA	NA	NA	NA	NA
process utilizing autophagic mechanism	NA	NA	NA	NA	NA	NA	NA	NA	2.5 (0.012422)	NA	NA	NA	NA	NA	NA	NA	NA	NA	NA	NA	NA	NA	NA	NA	NA	NA	NA	NA	NA	NA	NA	NA	NA	NA	NA	NA	NA	NA	NA	NA	NA
proline metabolic process	NA	NA	NA	NA	NA	NA	NA	NA	NA	NA	NA	NA	NA	NA	NA	NA	NA	NA	NA	NA	NA	NA	13.3 (0.029388)	NA	NA	NA	NA	NA	NA	NA	NA	NA	NA	NA	NA	NA	NA	NA	NA	NA	NA
proline transmembrane transport	NA	NA	NA	NA	NA	NA	NA	NA	NA	NA	NA	NA	5.3 (0.018423)	NA	NA	NA	NA	NA	NA	NA	NA	NA	NA	NA	NA	NA	NA	NA	NA	NA	NA	NA	NA	NA	NA	NA	NA	NA	NA	NA	NA
prospore membrane leading edge	NA	NA	NA	NA	NA	NA	NA	NA	NA	NA	NA	NA	NA	NA	NA	NA	NA	NA	NA	NA	NA	NA	NA	NA	NA	NA	NA	NA	NA	NA	NA	NA	NA	NA	NA	NA	25 (0.034898)	NA	NA	NA	NA
protease binding	NA	NA	NA	NA	NA	NA	5 (0.039056)	NA	NA	NA	NA	NA	2.3 (0.029391)	NA	NA	NA	NA	NA	NA	NA	NA	NA	NA	NA	NA	NA	NA	3.4 (0.043639)	NA	NA	NA	NA	NA	NA	NA	NA	NA	NA	NA	NA	8 (0.001118)
proteasome accessory complex	NA	NA	NA	NA	NA	NA	NA	NA	NA	NA	NA	NA	NA	NA	NA	NA	NA	NA	NA	NA	NA	NA	NA	NA	NA	NA	NA	NA	NA	4.5 (0.039653)	NA	NA	NA	NA	NA	NA	NA	NA	NA	NA	NA
proteasome assembly	NA	NA	NA	NA	NA	NA	NA	NA	NA	NA	NA	NA	NA	NA	NA	NA	NA	NA	NA	NA	NA	NA	NA	NA	NA	NA	NA	2.1 (0.042198)	NA	3.8 (0.005369)	NA	NA	NA	NA	NA	NA	NA	NA	NA	NA	NA
protein alkylation	NA	4 (0.030238)	NA	NA	NA	NA	NA	NA	4.8 (0.000574)	NA	NA	NA	NA	NA	NA	NA	NA	NA	NA	NA	NA	NA	NA	NA	NA	NA	NA	NA	NA	NA	NA	NA	NA	NA	NA	NA	NA	NA	NA	NA	NA
protein catabolic process in the vacuole	NA	4.5 (0.048394)	NA	NA	NA	NA	2.6 (0.048394)	2.8 (0.048394)	3.1 (0.048394)	NA	NA	NA	NA	NA	NA	NA	3.2 (0.025389)	NA	NA	NA	NA	NA	NA	NA	NA	NA	NA	NA	NA	3.4 (0.013151)	NA	NA	NA	NA	NA	NA	3.8 (0.048394)	NA	NA	NA	3.5 (0.025389)
protein complex oligomerization	NA	NA	33.3 (0.029222)	NA	NA	NA	NA	NA	NA	NA	NA	NA	2.6 (0.04359)	NA	NA	50 (0.029222)	NA	NA	NA	NA	NA	NA	NA	NA	NA	NA	NA	NA	NA	NA	NA	NA	NA	NA	NA	NA	NA	NA	NA	NA	NA
protein dimerization activity	NA	NA	NA	NA	NA	NA	NA	NA	NA	NA	NA	NA	NA	2.7 (0.020215)	NA	NA	NA	NA	NA	NA	NA	NA	NA	NA	NA	NA	NA	NA	NA	NA	NA	NA	NA	NA	NA	NA	NA	NA	NA	NA	NA
protein folding	NA	NA	NA	NA	NA	NA	NA	NA	NA	NA	NA	NA	NA	NA	NA	NA	NA	NA	NA	NA	NA	NA	NA	NA	NA	NA	NA	NA	NA	NA	NA	NA	NA	NA	NA	NA	3.1 (0.015474)	NA	NA	NA	NA
protein glutathionylation	NA	NA	NA	NA	NA	NA	NA	NA	NA	NA	NA	NA	NA	NA	NA	NA	NA	NA	NA	NA	NA	NA	NA	NA	NA	NA	NA	NA	NA	NA	Inf (0.007326)	NA	NA	NA	NA	NA	NA	NA	NA	NA	NA
protein initiator methionine removal	NA	NA	NA	NA	NA	NA	NA	NA	NA	NA	NA	NA	NA	NA	NA	NA	NA	NA	NA	NA	NA	NA	NA	NA	NA	NA	NA	NA	NA	NA	NA	NA	NA	NA	NA	100 (0.017052)	NA	NA	NA	NA	NA
protein kinase complex	NA	NA	NA	NA	NA	NA	NA	NA	NA	NA	NA	NA	NA	NA	NA	NA	NA	NA	NA	NA	NA	NA	NA	NA	NA	NA	NA	NA	NA	NA	NA	NA	NA	NA	NA	NA	NA	NA	NA	NA	2.1 (0.049082)
protein localization to endoplasmic reticulum exit site	NA	NA	NA	NA	NA	NA	NA	NA	NA	NA	NA	NA	NA	NA	NA	NA	NA	NA	NA	NA	NA	NA	NA	NA	NA	NA	NA	NA	NA	7.4 (0.02223)	NA	NA	NA	NA	NA	NA	NA	NA	NA	NA	14.3 (0.0114)
protein localization to nucleolus	NA	NA	NA	NA	NA	NA	NA	10.5 (0.015134)	NA	NA	NA	NA	NA	NA	NA	NA	NA	NA	NA	NA	11.1 (0.001151)	NA	NA	NA	NA	NA	NA	NA	NA	NA	NA	NA	NA	NA	NA	NA	NA	NA	NA	NA	NA
protein localization to vacuole	NA	NA	NA	NA	NA	NA	NA	NA	NA	NA	NA	NA	NA	NA	NA	NA	NA	NA	NA	NA	NA	NA	NA	NA	NA	NA	NA	NA	NA	NA	NA	NA	NA	NA	NA	NA	NA	NA	NA	NA	2.3 (0.026429)
protein phosphatase 1 binding	NA	NA	NA	NA	NA	NA	NA	NA	NA	NA	NA	NA	NA	NA	2.4 (0.001707)	NA	NA	NA	NA	NA	NA	NA	NA	NA	NA	NA	NA	7.1 (0.007531)	NA	NA	NA	NA	NA	NA	NA	NA	NA	NA	2.8 (0.034708)	NA	NA
protein phosphatase type 1 complex	NA	NA	NA	NA	NA	NA	NA	NA	NA	NA	NA	NA	4.3 (0.043344)	NA	2.2 (0.043344)	NA	NA	NA	NA	NA	NA	NA	NA	NA	NA	NA	NA	8.1 (0.016254)	NA	6 (0.043344)	NA	NA	NA	NA	NA	NA	NA	NA	3.4 (0.043344)	NA	NA
protein polymerization	NA	NA	NA	NA	NA	NA	NA	NA	NA	2.5 (0.007043)	NA	NA	NA	NA	NA	NA	NA	NA	NA	NA	NA	NA	NA	NA	NA	NA	NA	NA	NA	NA	NA	NA	NA	NA	NA	NA	NA	NA	NA	NA	NA
protein refolding	NA	NA	NA	NA	NA	NA	NA	NA	7.8 (0.006362)	NA	NA	NA	NA	NA	NA	NA	NA	NA	NA	NA	NA	NA	NA	NA	NA	NA	NA	NA	NA	4.6 (0.002954)	NA	NA	NA	NA	NA	NA	NA	NA	NA	NA	NA
protein self-association	NA	NA	NA	NA	NA	NA	NA	NA	NA	NA	NA	NA	NA	NA	2.7 (0.045202)	100 (0.02905)	NA	NA	NA	NA	NA	NA	NA	NA	NA	NA	7.1 (0.034449)	NA	NA	NA	NA	NA	NA	NA	NA	NA	NA	NA	NA	NA	NA
protein tag	NA	NA	NA	NA	NA	NA	NA	NA	NA	NA	NA	NA	NA	NA	NA	NA	NA	NA	NA	NA	NA	NA	NA	33.3 (0.029837)	NA	NA	NA	NA	NA	NA	NA	NA	NA	NA	NA	NA	NA	NA	NA	NA	NA
protein targeting to vacuole involved in autophagy	NA	NA	NA	NA	NA	NA	NA	NA	NA	NA	NA	NA	NA	NA	NA	NA	NA	NA	NA	NA	NA	NA	NA	NA	NA	NA	NA	10.5 (0.04273)	NA	NA	NA	NA	NA	NA	NA	NA	NA	NA	NA	NA	18.2 (0.030949)
protein unfolding	NA	NA	NA	NA	NA	NA	NA	12.5 (0.013354)	13.3 (0.014086)	NA	NA	NA	3.5 (0.020349)	NA	NA	NA	NA	NA	NA	NA	NA	NA	NA	NA	NA	NA	NA	NA	NA	NA	NA	NA	NA	NA	NA	NA	NA	NA	NA	100 (0.018326)	9.5 (0.024211)
protein-containing complex binding	NA	NA	NA	NA	NA	NA	NA	NA	2.6 (0.027936)	NA	NA	NA	NA	NA	NA	NA	NA	NA	NA	NA	NA	NA	NA	NA	NA	NA	NA	NA	NA	NA	NA	NA	NA	NA	NA	NA	NA	NA	NA	NA	NA
protein-containing complex subunit organization	NA	2.4 (0.017947)	NA	NA	NA	NA	NA	NA	NA	NA	NA	NA	NA	NA	NA	NA	NA	NA	NA	NA	NA	NA	NA	NA	NA	NA	NA	NA	NA	NA	NA	NA	NA	NA	NA	NA	NA	NA	NA	NA	NA
proton transmembrane transport	NA	NA	NA	NA	NA	NA	NA	4.7 (0.012408)	NA	NA	NA	NA	NA	NA	NA	NA	NA	NA	NA	NA	NA	NA	NA	NA	NA	NA	NA	NA	NA	6.4 (2.9e-05)	NA	NA	NA	NA	NA	NA	NA	NA	NA	NA	NA
proton-transporting ATP synthase complex	NA	NA	NA	NA	NA	NA	NA	NA	NA	NA	NA	NA	NA	NA	NA	NA	NA	NA	NA	NA	NA	NA	NA	NA	NA	NA	NA	NA	NA	12.6 (6e-06)	NA	NA	NA	NA	NA	NA	NA	NA	NA	NA	NA
proton-transporting two-sector ATPase complex	NA	NA	NA	NA	NA	NA	NA	NA	NA	NA	NA	NA	NA	NA	NA	NA	NA	NA	NA	NA	NA	NA	NA	NA	NA	NA	NA	NA	NA	6.1 (0.001372)	NA	NA	NA	NA	NA	NA	NA	NA	NA	NA	NA
pteridine-containing compound metabolic process	NA	NA	NA	NA	NA	NA	NA	NA	NA	4.8 (0.011543)	NA	NA	NA	NA	NA	22.2 (0.011543)	NA	NA	NA	NA	NA	NA	NA	NA	NA	NA	NA	NA	NA	NA	NA	NA	NA	25 (0.006345)	NA	NA	NA	NA	NA	66.7 (0.004285)	NA
purine nucleoside triphosphate metabolic process	NA	NA	NA	NA	NA	NA	NA	NA	NA	NA	NA	NA	NA	NA	NA	NA	NA	NA	NA	NA	NA	NA	NA	NA	NA	NA	NA	NA	NA	10 (0.006041)	NA	NA	NA	NA	NA	NA	NA	NA	NA	NA	NA
purine-containing compound metabolic process	NA	NA	NA	NA	NA	NA	NA	3.1 (0.000218)	NA	NA	NA	NA	NA	NA	NA	7.6 (0.000736)	NA	NA	NA	NA	NA	NA	NA	NA	NA	4.1 (0.046393)	NA	NA	NA	4.1 (0)	NA	NA	NA	6.2 (0.012398)	NA	NA	NA	NA	NA	10.3 (0.046393)	NA
pyridine-containing compound metabolic process	3.3 (0.045844)	NA	NA	NA	NA	NA	NA	NA	NA	NA	NA	NA	NA	2.6 (0.035488)	NA	NA	NA	NA	NA	NA	NA	NA	NA	NA	NA	NA	NA	NA	NA	NA	NA	NA	NA	NA	NA	NA	NA	NA	NA	NA	3 (0.034687)
pyrimidine-containing compound metabolic process	NA	NA	NA	NA	NA	NA	4.7 (0.00096)	NA	NA	NA	NA	NA	NA	NA	NA	NA	NA	NA	NA	NA	NA	NA	NA	NA	NA	NA	NA	NA	NA	NA	NA	NA	NA	NA	NA	NA	NA	NA	NA	NA	NA
pyruvate decarboxylase activity	NA	NA	NA	NA	NA	NA	22.2 (0.034444)	NA	NA	NA	NA	NA	NA	NA	3.6 (0.011858)	NA	NA	NA	NA	NA	NA	NA	NA	NA	NA	NA	NA	NA	NA	NA	NA	NA	NA	NA	NA	NA	NA	NA	NA	NA	NA
pyruvate metabolic process	NA	NA	NA	NA	NA	NA	NA	4.1 (0.034372)	NA	NA	NA	NA	NA	NA	NA	20 (0.01401)	8.6 (0.000651)	NA	NA	NA	NA	NA	NA	NA	NA	NA	NA	NA	NA	NA	NA	NA	NA	NA	NA	NA	NA	NA	NA	NA	NA
quaternary ammonium group binding	NA	NA	NA	2.7 (0.015461)	NA	NA	6.9 (0.01118)	NA	NA	NA	2.7 (0.000792)	NA	NA	NA	NA	NA	NA	NA	NA	NA	NA	4.7 (0.001539)	NA	33.3 (0.030148)	Inf (0.006772)	NA	NA	NA	NA	NA	100 (0.020191)	NA	NA	NA	NA	NA	NA	NA	NA	50 (0.040015)	NA
quaternary ammonium group transport	NA	NA	NA	2.7 (0.044353)	NA	NA	NA	NA	NA	NA	NA	NA	NA	NA	NA	NA	NA	7.7 (0.038115)	NA	NA	NA	NA	NA	NA	NA	NA	NA	NA	NA	NA	NA	NA	5.9 (0.025542)	NA	NA	NA	NA	NA	NA	NA	NA
rRNA metabolic process	NA	NA	NA	NA	NA	NA	NA	NA	2.6 (0.019844)	NA	NA	NA	NA	NA	NA	NA	NA	NA	NA	NA	NA	NA	NA	NA	NA	NA	NA	NA	NA	NA	NA	NA	NA	5.3 (0.045525)	NA	NA	2.6 (0.008036)	NA	NA	NA	NA
racemase and epimerase activity	NA	NA	NA	NA	2.9 (0.029095)	NA	NA	NA	NA	NA	NA	NA	NA	NA	NA	NA	NA	NA	NA	NA	5.1 (0.029095)	4.7 (0.010295)	NA	NA	NA	NA	NA	NA	NA	NA	NA	NA	NA	NA	NA	NA	NA	NA	NA	NA	NA
regulation of DNA-templated transcription in response to stress	NA	4.8 (0.036763)	NA	NA	NA	NA	NA	NA	NA	NA	NA	NA	NA	NA	NA	NA	NA	NA	NA	NA	NA	NA	NA	NA	NA	NA	NA	NA	NA	NA	NA	NA	NA	NA	NA	NA	NA	NA	NA	NA	NA
regulation of DNA-templated transcription, elongation	NA	NA	NA	NA	NA	NA	NA	NA	NA	NA	NA	NA	NA	NA	NA	NA	NA	NA	NA	NA	NA	NA	NA	NA	NA	NA	NA	NA	NA	2.3 (0.028845)	NA	NA	NA	NA	NA	NA	NA	NA	NA	NA	NA
regulation of DNA-templated transcription, initiation	NA	NA	NA	NA	NA	NA	NA	NA	7.4 (0.037594)	NA	NA	NA	NA	NA	NA	NA	NA	NA	NA	NA	NA	NA	NA	NA	NA	NA	NA	NA	NA	NA	NA	NA	NA	NA	NA	NA	NA	NA	NA	NA	NA
regulation of binding	NA	NA	NA	NA	NA	NA	NA	NA	NA	NA	NA	NA	NA	NA	NA	NA	NA	NA	NA	NA	3.9 (0.04)	NA	NA	NA	NA	NA	NA	NA	NA	NA	NA	NA	NA	NA	NA	NA	NA	NA	NA	NA	NA
regulation of biological quality	NA	2.3 (0.04652)	NA	NA	NA	NA	NA	NA	NA	NA	NA	NA	NA	NA	NA	NA	NA	NA	NA	2.7 (0.002253)	NA	NA	NA	NA	NA	NA	NA	NA	NA	NA	NA	NA	NA	NA	NA	NA	NA	NA	NA	NA	NA
regulation of cell communication	NA	2.5 (0.030955)	NA	NA	NA	NA	NA	NA	NA	NA	NA	NA	NA	NA	NA	NA	NA	NA	NA	NA	NA	NA	NA	NA	NA	NA	NA	NA	NA	NA	NA	NA	NA	NA	NA	NA	NA	NA	NA	NA	NA
regulation of hydrolase activity	NA	4.2 (0.002894)	NA	NA	NA	NA	NA	NA	NA	NA	NA	NA	NA	NA	NA	NA	NA	NA	NA	NA	NA	NA	NA	NA	NA	NA	NA	NA	NA	NA	NA	NA	NA	NA	NA	NA	NA	NA	NA	NA	3 (0.021153)
regulation of membrane potential	NA	NA	NA	NA	NA	NA	NA	NA	NA	NA	NA	NA	NA	NA	NA	NA	NA	NA	NA	NA	NA	NA	NA	NA	Inf (0.018202)	NA	NA	NA	NA	NA	NA	NA	NA	NA	NA	NA	NA	NA	NA	NA	NA
regulation of protein folding	NA	NA	NA	NA	NA	NA	NA	NA	NA	NA	NA	NA	NA	NA	NA	NA	25 (0.043478)	NA	NA	NA	NA	NA	NA	NA	NA	NA	NA	NA	NA	NA	NA	NA	NA	NA	NA	NA	NA	NA	NA	NA	NA
regulation of protein stability	NA	NA	NA	NA	NA	NA	NA	NA	8.2 (0.007909)	NA	NA	NA	NA	NA	NA	NA	NA	NA	NA	NA	NA	NA	NA	NA	NA	NA	NA	NA	NA	NA	NA	NA	NA	NA	NA	NA	10 (0.004065)	NA	NA	NA	NA
regulation of proteolysis	NA	NA	NA	NA	NA	NA	NA	NA	NA	NA	NA	NA	NA	NA	NA	NA	NA	NA	NA	NA	NA	NA	NA	NA	NA	NA	NA	2.9 (0.024759)	NA	NA	NA	NA	NA	NA	NA	NA	NA	NA	NA	NA	NA
regulation of transcription from RNA polymerase II promoter by a nonfermentable carbon source	NA	NA	NA	6.9 (0.012097)	NA	NA	18.2 (0.012097)	NA	NA	NA	NA	NA	5.3 (0.034677)	NA	NA	NA	NA	NA	NA	NA	NA	NA	NA	NA	NA	NA	NA	NA	NA	NA	NA	NA	NA	NA	NA	NA	NA	NA	4.3 (0.034677)	NA	NA
replication-born double-strand break repair via sister chromatid exchange	NA	NA	NA	NA	NA	NA	NA	NA	NA	NA	NA	NA	NA	NA	NA	NA	NA	NA	NA	NA	NA	NA	NA	NA	NA	NA	NA	NA	NA	NA	NA	NA	NA	NA	NA	NA	8.3 (0.023158)	NA	NA	NA	NA
reproduction	NA	NA	NA	NA	NA	NA	NA	2.9 (1e-06)	NA	NA	NA	NA	NA	NA	NA	NA	NA	NA	NA	NA	2.1 (4.4e-05)	NA	NA	NA	NA	NA	NA	NA	NA	NA	NA	NA	NA	NA	NA	NA	2.2 (0.004965)	NA	NA	NA	NA
reproduction of a single-celled organism	2.7 (0.000844)	NA	NA	NA	NA	NA	3.1 (0.005195)	NA	NA	NA	NA	NA	NA	NA	NA	NA	NA	NA	NA	NA	3.4 (0.00238)	NA	NA	NA	NA	NA	NA	NA	NA	NA	NA	NA	NA	NA	NA	NA	NA	NA	NA	NA	NA
reproductive process in single-celled organism	NA	NA	NA	NA	NA	3.3 (0.04814)	4.5 (0.019997)	NA	NA	NA	NA	NA	NA	NA	NA	NA	NA	NA	NA	NA	NA	NA	NA	NA	NA	NA	NA	2.7 (0.034554)	NA	NA	NA	NA	NA	NA	NA	NA	NA	NA	NA	NA	NA
respirasome	NA	NA	NA	NA	NA	4 (0.001133)	NA	11.5 (0)	NA	NA	NA	NA	NA	NA	NA	NA	NA	NA	NA	NA	3.3 (0.028054)	NA	NA	NA	NA	NA	NA	NA	NA	9.8 (0)	NA	NA	NA	NA	NA	NA	NA	NA	NA	NA	3.5 (0.047474)
respiratory chain complex II assembly	NA	NA	NA	NA	NA	NA	NA	NA	NA	NA	NA	NA	NA	NA	NA	NA	NA	NA	NA	NA	NA	NA	NA	NA	NA	NA	NA	NA	NA	NA	100 (0.00969)	NA	5.9 (0.00969)	NA	NA	NA	NA	NA	NA	NA	NA
response to abiotic stimulus	NA	3.3 (0.007595)	NA	NA	NA	NA	NA	NA	NA	NA	NA	NA	NA	NA	NA	5.6 (0.019949)	NA	NA	NA	NA	NA	NA	NA	NA	NA	NA	NA	NA	NA	NA	NA	NA	NA	4.2 (0.042464)	NA	NA	2.8 (0.016495)	NA	NA	NA	3.3 (0.000602)
response to acid chemical	NA	7.4 (0.047746)	NA	NA	NA	NA	NA	NA	NA	NA	NA	NA	NA	NA	NA	NA	NA	NA	NA	NA	NA	NA	NA	NA	NA	NA	NA	NA	NA	NA	NA	NA	NA	NA	NA	NA	NA	NA	NA	NA	NA
response to biotic stimulus	NA	NA	NA	NA	NA	NA	NA	NA	NA	NA	NA	NA	NA	NA	NA	NA	NA	NA	NA	NA	NA	NA	NA	NA	NA	NA	NA	3.7 (0.045613)	NA	NA	NA	NA	NA	NA	NA	NA	NA	NA	NA	NA	NA
response to carbon starvation	NA	NA	NA	NA	NA	NA	33.3 (0.041096)	NA	50 (0.041096)	NA	NA	NA	NA	NA	NA	NA	NA	33.3 (0.041096)	NA	NA	NA	NA	NA	NA	NA	NA	NA	NA	NA	NA	NA	NA	NA	NA	NA	NA	50 (0.027397)	NA	NA	NA	NA
response to endogenous stimulus	NA	NA	NA	NA	NA	NA	NA	NA	NA	NA	NA	NA	NA	NA	NA	NA	NA	NA	NA	NA	NA	NA	NA	NA	NA	NA	NA	3.5 (0.012872)	NA	NA	NA	NA	NA	NA	NA	NA	NA	NA	NA	NA	NA
response to external stimulus	NA	NA	NA	NA	NA	NA	NA	NA	NA	NA	NA	NA	NA	NA	NA	NA	2.7 (0.000963)	NA	NA	NA	NA	NA	NA	NA	NA	NA	NA	NA	NA	3.1 (0.000561)	NA	NA	NA	NA	NA	NA	NA	NA	NA	NA	3.3 (0.001801)
response to inorganic substance	NA	4.5 (0.024)	NA	NA	NA	NA	NA	NA	NA	3.1 (0.006561)	NA	NA	NA	NA	NA	NA	NA	NA	NA	NA	NA	NA	NA	NA	NA	NA	NA	NA	NA	3.7 (0.008822)	NA	NA	NA	NA	NA	NA	NA	NA	NA	NA	3.7 (0.042055)
response to metal ion	NA	NA	NA	NA	NA	NA	NA	NA	NA	6.8 (0.036288)	NA	NA	NA	NA	NA	NA	NA	NA	NA	NA	NA	NA	NA	NA	NA	NA	NA	NA	NA	NA	NA	NA	NA	NA	NA	NA	NA	NA	NA	NA	NA
response to organic cyclic compound	NA	NA	20 (0.032787)	NA	NA	NA	NA	NA	NA	NA	NA	NA	NA	NA	NA	NA	NA	NA	NA	NA	NA	NA	NA	NA	NA	NA	NA	NA	NA	NA	NA	NA	NA	NA	NA	NA	NA	NA	NA	NA	NA
response to organic substance	NA	NA	NA	NA	NA	NA	NA	2.7 (0.039059)	NA	NA	NA	NA	NA	NA	NA	NA	NA	NA	NA	NA	NA	NA	NA	NA	NA	NA	NA	NA	NA	NA	NA	NA	NA	NA	NA	NA	NA	NA	NA	NA	NA
response to oxygen-containing compound	2.4 (0.01445)	NA	NA	NA	NA	NA	NA	NA	NA	NA	NA	NA	NA	NA	NA	NA	NA	NA	NA	NA	NA	NA	NA	NA	NA	NA	NA	NA	NA	3.1 (0.019503)	NA	NA	NA	NA	NA	NA	NA	NA	NA	NA	NA
response to pheromone	NA	NA	NA	NA	NA	NA	NA	5.2 (0.00438)	NA	NA	NA	NA	NA	NA	NA	NA	NA	NA	NA	NA	NA	NA	NA	NA	NA	NA	NA	NA	NA	NA	NA	NA	NA	NA	NA	NA	NA	NA	NA	NA	NA
response to salt stress	NA	NA	NA	NA	NA	NA	NA	NA	NA	NA	NA	NA	NA	NA	NA	NA	3.2 (0.03863)	NA	NA	NA	NA	NA	NA	NA	NA	NA	NA	NA	NA	NA	NA	NA	NA	NA	NA	NA	NA	NA	NA	NA	NA
response to temperature stimulus	NA	NA	NA	NA	NA	NA	NA	3.7 (0.011012)	NA	NA	NA	NA	NA	NA	NA	NA	NA	NA	NA	NA	NA	NA	NA	NA	NA	NA	NA	NA	NA	3.2 (0.016465)	NA	NA	NA	NA	NA	NA	5.8 (0.00494)	NA	NA	NA	NA
response to toxic substance	NA	NA	NA	NA	NA	NA	NA	NA	NA	NA	NA	NA	NA	NA	NA	NA	3.4 (0.034195)	NA	NA	NA	NA	NA	NA	NA	NA	NA	NA	NA	NA	NA	NA	NA	NA	NA	NA	NA	NA	NA	NA	NA	NA
riboflavin synthase activity	50 (0.023256)	NA	NA	NA	NA	NA	NA	NA	NA	NA	NA	NA	NA	NA	NA	NA	NA	NA	NA	NA	NA	NA	NA	NA	NA	NA	NA	NA	NA	NA	NA	NA	NA	NA	NA	NA	NA	NA	NA	NA	NA
ribonucleoprotein complex	NA	2.4 (0.007029)	NA	NA	NA	NA	NA	NA	NA	NA	NA	NA	NA	NA	NA	NA	NA	NA	NA	NA	NA	NA	NA	NA	NA	NA	NA	NA	NA	NA	NA	NA	NA	2.6 (0.012079)	NA	NA	NA	NA	NA	NA	NA
ribonucleoprotein complex biogenesis	NA	NA	NA	NA	NA	NA	NA	NA	2.8 (0.00393)	NA	NA	NA	NA	NA	NA	NA	NA	NA	NA	NA	NA	NA	NA	NA	NA	NA	NA	NA	NA	NA	NA	NA	NA	NA	NA	NA	2.3 (0.036068)	NA	NA	NA	NA
ribonucleoprotein complex subunit organization	NA	NA	NA	NA	NA	NA	NA	NA	3.4 (0.001722)	NA	NA	NA	NA	NA	NA	NA	NA	NA	NA	NA	NA	NA	NA	NA	NA	NA	NA	NA	NA	NA	NA	NA	NA	NA	NA	NA	NA	NA	NA	NA	NA
ribonucleoside triphosphate metabolic process	NA	NA	NA	NA	NA	NA	NA	NA	NA	NA	NA	NA	NA	NA	NA	NA	NA	NA	NA	NA	NA	NA	NA	NA	NA	NA	NA	NA	NA	9.6 (0.037309)	NA	NA	NA	NA	NA	NA	NA	NA	NA	NA	NA
ribose phosphate metabolic process	NA	NA	NA	NA	NA	NA	NA	3.4 (0.017424)	NA	NA	NA	NA	NA	NA	NA	NA	NA	NA	NA	NA	NA	NA	NA	NA	NA	NA	NA	NA	NA	4.2 (0.000302)	NA	NA	NA	NA	NA	NA	NA	NA	NA	NA	NA
secondary active transmembrane transporter activity	NA	NA	NA	NA	NA	NA	2.9 (0.019011)	NA	NA	NA	NA	NA	NA	NA	NA	NA	3.2 (0.040595)	2.7 (0.037454)	NA	NA	NA	2.3 (0.009578)	NA	NA	NA	NA	NA	NA	NA	NA	NA	NA	NA	NA	NA	NA	NA	NA	NA	NA	NA
secretion	NA	NA	4.5 (0.036053)	NA	NA	NA	NA	NA	NA	NA	NA	NA	NA	NA	NA	NA	NA	NA	NA	NA	NA	NA	NA	NA	NA	NA	NA	NA	NA	NA	NA	NA	NA	NA	NA	NA	3 (0.021682)	NA	NA	NA	NA
selective autophagy	NA	NA	NA	NA	NA	NA	NA	NA	NA	3.1 (0.023568)	NA	NA	NA	NA	NA	NA	NA	NA	NA	NA	NA	NA	NA	NA	NA	NA	NA	NA	NA	NA	NA	NA	NA	NA	NA	NA	NA	NA	NA	NA	NA
selenocysteinyl-tRNA(Sec) biosynthetic process	NA	NA	NA	NA	NA	NA	NA	NA	NA	NA	NA	NA	NA	NA	NA	NA	NA	NA	NA	NA	NA	NA	NA	NA	NA	NA	NA	NA	NA	NA	NA	NA	NA	NA	NA	NA	NA	20 (0.047619)	NA	NA	NA
septin cytoskeleton	NA	NA	NA	NA	NA	2.4 (0.012876)	NA	NA	NA	NA	NA	NA	NA	NA	NA	NA	NA	NA	NA	NA	2.9 (0.035146)	NA	NA	NA	NA	NA	NA	NA	NA	NA	NA	NA	NA	NA	NA	NA	NA	NA	NA	NA	NA
serine family amino acid metabolic process	NA	NA	NA	NA	NA	NA	NA	NA	NA	NA	NA	NA	NA	NA	NA	15.8 (0.035567)	NA	NA	NA	NA	NA	NA	NA	NA	NA	NA	NA	NA	NA	NA	NA	NA	NA	NA	NA	NA	NA	NA	NA	NA	NA
serine hydrolase activity	NA	6.1 (0.025428)	NA	NA	NA	NA	3.5 (0.049716)	NA	NA	NA	NA	NA	NA	NA	NA	NA	NA	NA	NA	NA	NA	NA	NA	NA	NA	NA	NA	NA	NA	NA	NA	NA	NA	NA	NA	NA	NA	NA	NA	NA	5.6 (0.016262)
serine-tRNA ligase activity	NA	NA	NA	NA	NA	NA	NA	NA	NA	NA	NA	NA	NA	NA	NA	NA	NA	NA	NA	NA	NA	NA	NA	NA	NA	NA	NA	NA	NA	NA	NA	NA	NA	NA	NA	NA	NA	20 (0.028571)	NA	NA	NA
short-chain fatty acid metabolic process	NA	NA	NA	NA	NA	NA	NA	NA	NA	NA	NA	NA	NA	NA	NA	NA	8.7 (0.046264)	NA	NA	NA	NA	NA	NA	NA	NA	NA	NA	NA	NA	NA	NA	NA	NA	NA	NA	NA	NA	NA	NA	NA	NA
sialic acid transport	NA	NA	NA	14.3 (0.034483)	NA	NA	NA	33.3 (0.034483)	NA	NA	NA	NA	NA	NA	NA	NA	NA	33.3 (0.034483)	100 (0.017241)	NA	NA	NA	NA	NA	NA	NA	NA	NA	NA	NA	NA	NA	NA	NA	NA	NA	NA	NA	NA	NA	NA
siderophore transport	NA	30 (0.043956)	NA	NA	NA	NA	NA	NA	20 (0.043956)	20 (0.043956)	NA	7.1 (0.043956)	8.8 (0.001998)	NA	3.6 (0.046953)	NA	NA	NA	NA	133.3 (0.010989)	13 (0.043956)	NA	NA	NA	NA	NA	9.5 (0.010989)	NA	NA	10 (0.046953)	NA	NA	NA	NA	NA	NA	NA	NA	NA	NA	NA
signaling receptor binding	NA	NA	NA	NA	NA	NA	NA	12.5 (0.003036)	NA	NA	NA	NA	2.4 (0.043662)	NA	NA	40 (0.006805)	NA	NA	NA	NA	8.6 (0.003269)	NA	NA	NA	NA	NA	NA	NA	NA	NA	NA	NA	NA	NA	NA	NA	11.1 (0.038065)	NA	NA	NA	NA
single-stranded RNA binding	NA	NA	NA	NA	NA	4.1 (0.003097)	NA	NA	NA	NA	NA	NA	NA	NA	NA	NA	NA	NA	NA	NA	NA	NA	NA	NA	NA	NA	NA	NA	NA	NA	NA	NA	NA	NA	NA	NA	NA	NA	NA	NA	NA
small molecule binding	NA	NA	NA	NA	NA	NA	NA	NA	NA	NA	NA	NA	NA	NA	NA	NA	NA	NA	NA	NA	NA	NA	NA	NA	NA	NA	NA	NA	NA	NA	4.7 (0.009882)	NA	NA	NA	NA	NA	NA	NA	NA	4 (0.034384)	NA
small molecule biosynthetic process	NA	NA	NA	NA	NA	NA	NA	NA	NA	NA	NA	NA	NA	NA	NA	NA	3 (0.000227)	NA	NA	NA	NA	NA	NA	NA	NA	NA	NA	NA	NA	NA	NA	NA	NA	NA	NA	NA	NA	NA	NA	NA	NA
small molecule metabolic process	NA	NA	NA	NA	NA	NA	NA	NA	NA	NA	NA	NA	NA	NA	NA	3.1 (0.006079)	2.3 (0)	NA	NA	NA	NA	NA	NA	3.3 (0.00037)	NA	3.6 (0.000761)	NA	NA	NA	NA	4.6 (0.036548)	NA	NA	NA	NA	NA	NA	NA	NA	4.9 (0.008106)	NA
snRNA binding	NA	9.1 (0.024225)	NA	NA	NA	NA	NA	NA	NA	NA	NA	NA	NA	NA	NA	NA	NA	NA	NA	NA	NA	NA	NA	NA	NA	NA	NA	NA	NA	NA	NA	NA	NA	NA	NA	NA	NA	NA	NA	NA	NA
snRNA transcription	NA	NA	NA	NA	NA	NA	NA	NA	NA	NA	NA	NA	NA	NA	NA	NA	25 (0.032787)	NA	NA	NA	NA	NA	NA	NA	NA	NA	NA	NA	NA	NA	NA	NA	NA	NA	NA	NA	NA	NA	NA	NA	NA
soladodine glucosyltransferase activity	NA	NA	NA	NA	NA	NA	NA	NA	NA	NA	NA	NA	NA	NA	NA	NA	NA	NA	NA	NA	NA	NA	NA	NA	NA	NA	NA	16.7 (0.013889)	NA	NA	NA	NA	NA	NA	NA	NA	NA	NA	NA	NA	NA
spliceosomal complex	NA	5.7 (0.009541)	NA	NA	NA	NA	NA	NA	NA	NA	NA	NA	NA	NA	NA	NA	NA	NA	NA	NA	NA	NA	NA	NA	NA	NA	NA	NA	NA	NA	NA	NA	NA	NA	NA	NA	NA	NA	NA	NA	NA
spore wall	NA	NA	NA	6.8 (0.003597)	7.3 (0.001849)	10.5 (0.011921)	NA	NA	NA	NA	NA	NA	NA	NA	NA	NA	NA	NA	NA	NA	NA	NA	NA	NA	NA	NA	NA	NA	NA	NA	NA	NA	NA	NA	NA	NA	NA	6.7 (0.011921)	2.8 (0.004104)	NA	NA
sporulation	2.8 (0.026272)	NA	NA	NA	NA	3.4 (0.001513)	4.2 (0.00057)	NA	NA	NA	NA	NA	NA	NA	NA	NA	NA	NA	NA	NA	3.5 (0.001711)	NA	NA	NA	NA	NA	NA	2.4 (0.003251)	NA	2.4 (0.042771)	NA	NA	NA	NA	NA	NA	3.4 (0.016453)	NA	NA	NA	NA
steroid metabolic process	NA	NA	NA	NA	NA	NA	NA	NA	NA	NA	NA	NA	NA	NA	NA	NA	4.5 (0.043855)	NA	NA	NA	NA	NA	NA	NA	NA	NA	NA	NA	NA	NA	NA	NA	NA	NA	NA	NA	NA	NA	NA	NA	NA
storage vacuole	NA	NA	NA	NA	NA	NA	NA	NA	NA	NA	NA	NA	NA	NA	NA	NA	NA	NA	NA	2.7 (0.011378)	NA	NA	NA	NA	NA	NA	NA	NA	NA	NA	NA	NA	NA	NA	NA	3.5 (0.047839)	NA	NA	NA	NA	NA
stress-activated protein kinase signaling cascade	NA	NA	NA	NA	NA	NA	NA	NA	3.6 (0.042202)	NA	NA	NA	NA	NA	NA	NA	NA	NA	NA	NA	NA	NA	NA	NA	NA	NA	NA	NA	NA	NA	NA	NA	NA	NA	NA	NA	NA	NA	NA	NA	NA
stress-induced homeostatically regulated protein degradation pathway	NA	NA	NA	NA	NA	NA	NA	NA	NA	NA	NA	NA	NA	NA	NA	NA	NA	NA	NA	NA	NA	NA	NA	NA	NA	NA	NA	NA	NA	6.1 (0.023469)	NA	NA	NA	NA	NA	NA	NA	NA	NA	NA	NA
succinate dehydrogenase activity	NA	NA	NA	NA	NA	NA	NA	NA	NA	NA	NA	NA	NA	NA	NA	NA	NA	NA	NA	NA	NA	NA	NA	NA	NA	NA	NA	NA	NA	8.5 (0.023908)	NA	NA	NA	NA	NA	NA	NA	NA	NA	NA	NA
succinyltransferase activity	NA	NA	NA	NA	NA	NA	NA	NA	NA	NA	NA	NA	NA	NA	NA	NA	NA	NA	NA	NA	NA	NA	NA	NA	NA	NA	NA	NA	NA	7.7 (0.037912)	NA	NA	NA	NA	NA	NA	NA	NA	NA	NA	NA
sulfur amino acid metabolic process	NA	NA	NA	NA	NA	NA	NA	NA	NA	NA	NA	NA	NA	NA	NA	NA	5.4 (0.009104)	NA	NA	NA	NA	NA	NA	NA	NA	NA	NA	NA	NA	NA	NA	NA	NA	NA	NA	NA	NA	NA	NA	NA	NA
sulfur compound binding	NA	NA	NA	NA	NA	NA	7 (0.001705)	NA	NA	NA	NA	NA	NA	NA	NA	NA	NA	NA	NA	NA	NA	3.1 (0.003526)	NA	20 (0.044918)	100 (0.010149)	25 (0.003929)	NA	NA	NA	NA	50 (0.030159)	NA	NA	NA	NA	NA	NA	NA	NA	NA	NA
sulfur compound metabolic process	NA	NA	NA	NA	NA	NA	NA	NA	NA	NA	NA	NA	NA	NA	NA	NA	2.7 (0.000451)	NA	NA	NA	NA	NA	NA	5 (0.028976)	NA	NA	NA	NA	NA	NA	18.8 (0.00113)	NA	NA	NA	NA	NA	NA	NA	NA	NA	NA
sulfur compound transport	NA	NA	NA	NA	NA	NA	NA	NA	NA	NA	NA	NA	NA	NA	NA	NA	NA	NA	NA	NA	NA	NA	5.6 (0.00758)	NA	NA	NA	NA	NA	NA	NA	NA	NA	NA	NA	NA	NA	NA	NA	NA	NA	NA
symporter activity	NA	NA	NA	NA	NA	NA	NA	NA	NA	NA	NA	NA	NA	NA	NA	NA	6 (0.02365)	NA	NA	NA	NA	4.7 (0.018311)	NA	NA	NA	NA	NA	NA	NA	NA	NA	NA	NA	NA	NA	NA	NA	NA	NA	NA	NA
synaptonemal complex organization	NA	NA	NA	3.4 (4.2e-05)	5.5 (0)	8 (9e-06)	4.3 (0.017567)	4.7 (0.035626)	NA	NA	NA	NA	2.6 (0.000532)	NA	NA	NA	NA	NA	NA	NA	6.5 (0.001193)	4.4 (9.9e-05)	NA	NA	NA	NA	NA	NA	NA	NA	NA	NA	NA	NA	NA	NA	6.2 (0.042752)	NA	2.1 (0.00093)	NA	NA
telomerase holoenzyme complex	NA	NA	NA	NA	NA	NA	NA	NA	NA	NA	NA	NA	NA	NA	NA	NA	NA	NA	NA	NA	NA	NA	NA	NA	NA	NA	NA	NA	NA	NA	NA	NA	NA	NA	NA	25 (0.03653)	NA	NA	NA	NA	NA
tetrapyrrole binding	NA	NA	NA	NA	NA	NA	NA	5.8 (0.015186)	NA	NA	NA	NA	NA	NA	NA	NA	4.1 (0.027556)	NA	NA	NA	NA	NA	NA	NA	NA	NA	NA	NA	NA	NA	NA	NA	NA	NA	NA	NA	NA	NA	NA	NA	NA
tetrapyrrole metabolic process	NA	NA	NA	NA	NA	NA	NA	NA	NA	NA	NA	NA	NA	NA	NA	NA	4.1 (0.024602)	NA	NA	NA	NA	NA	NA	NA	NA	NA	NA	NA	NA	NA	NA	NA	NA	NA	NA	NA	NA	NA	NA	NA	NA
transcription elongation factor complex	NA	NA	NA	NA	NA	NA	NA	NA	7.1 (0.021761)	NA	NA	NA	NA	NA	NA	NA	NA	NA	NA	NA	NA	NA	NA	NA	NA	NA	NA	NA	NA	NA	NA	NA	NA	NA	NA	NA	NA	NA	NA	NA	NA
transcription factor TFIIH holo complex binding	NA	NA	NA	NA	NA	NA	NA	33.3 (0.034483)	NA	NA	NA	NA	11.1 (0.024631)	NA	NA	NA	NA	NA	NA	NA	NA	NA	NA	NA	NA	NA	NA	NA	NA	NA	NA	NA	NA	NA	NA	NA	50 (0.034483)	20 (0.004926)	8.3 (0.019704)	NA	NA
transcription factor binding	NA	NA	NA	NA	NA	NA	NA	NA	NA	NA	NA	NA	NA	NA	NA	NA	NA	NA	NA	NA	NA	NA	NA	NA	NA	NA	NA	NA	NA	NA	NA	NA	NA	NA	NA	NA	NA	NA	NA	13.3 (0.026082)	NA
transcription regulator activity	NA	NA	NA	NA	NA	NA	NA	NA	NA	NA	NA	NA	NA	NA	NA	NA	NA	NA	NA	NA	NA	NA	NA	NA	NA	NA	NA	NA	NA	NA	NA	NA	NA	NA	NA	NA	NA	NA	NA	NA	2.3 (5e-06)
transcription regulator complex	NA	NA	NA	NA	NA	NA	NA	NA	NA	NA	NA	NA	NA	NA	NA	NA	NA	NA	NA	NA	NA	NA	NA	NA	NA	NA	NA	NA	NA	NA	NA	NA	NA	NA	NA	NA	NA	NA	NA	9.5 (0.014788)	NA
transcription regulatory region nucleic acid binding	NA	NA	NA	NA	NA	NA	NA	NA	NA	NA	NA	NA	NA	NA	NA	NA	NA	NA	NA	NA	NA	NA	NA	NA	NA	NA	NA	NA	NA	NA	NA	NA	NA	NA	NA	NA	NA	NA	NA	NA	2.2 (0)
transcription repressor complex	NA	NA	NA	NA	NA	NA	NA	NA	NA	NA	NA	NA	NA	16.7 (0.038462)	NA	NA	NA	NA	NA	NA	NA	NA	NA	NA	NA	NA	NA	NA	NA	NA	NA	NA	NA	NA	NA	NA	NA	NA	NA	NA	NA
transcription-coupled nucleotide-excision repair	NA	NA	NA	NA	NA	NA	NA	NA	12.8 (0.003684)	NA	NA	NA	NA	NA	NA	NA	NA	NA	NA	NA	NA	NA	NA	NA	NA	NA	NA	4 (0.036134)	NA	NA	NA	NA	NA	NA	NA	NA	NA	NA	NA	NA	NA
transcriptionally active chromatin	NA	NA	NA	NA	NA	NA	NA	NA	23.5 (3.8e-05)	NA	NA	NA	NA	NA	NA	NA	NA	NA	NA	NA	NA	NA	NA	NA	NA	NA	NA	NA	NA	NA	NA	NA	NA	NA	NA	NA	NA	NA	NA	NA	NA
transferase activity, transferring nitrogenous groups	NA	NA	NA	NA	NA	NA	NA	NA	NA	NA	NA	NA	NA	NA	NA	NA	NA	NA	NA	7.7 (0.044778)	NA	NA	5.6 (0.004696)	28.6 (0.00049)	NA	NA	NA	NA	NA	NA	NA	NA	NA	NA	NA	NA	NA	NA	NA	NA	NA
transition metal ion transport	NA	NA	NA	NA	NA	NA	NA	NA	NA	NA	NA	NA	NA	NA	NA	NA	NA	NA	NA	NA	NA	NA	NA	NA	NA	NA	2.6 (0.012896)	NA	NA	2.9 (0.008017)	NA	NA	NA	NA	NA	NA	NA	NA	NA	NA	NA
translational frameshifting	NA	NA	NA	NA	NA	NA	5.9 (0.012097)	NA	NA	NA	NA	NA	NA	NA	NA	NA	NA	6.7 (0.012097)	NA	33.3 (0.012097)	NA	NA	NA	NA	NA	NA	NA	NA	NA	NA	NA	NA	NA	NA	NA	NA	NA	NA	NA	NA	4.8 (0.035925)
translational initiation	NA	NA	NA	NA	NA	NA	NA	NA	NA	NA	NA	NA	NA	NA	NA	NA	NA	NA	NA	NA	NA	NA	NA	NA	NA	NA	NA	NA	NA	NA	NA	NA	NA	NA	NA	NA	2.5 (0.014808)	NA	NA	NA	NA
transmembrane transport	NA	NA	NA	NA	NA	NA	NA	NA	NA	NA	NA	NA	NA	NA	NA	NA	NA	NA	NA	NA	NA	NA	NA	NA	NA	NA	NA	NA	NA	2.6 (1e-05)	NA	NA	NA	NA	NA	NA	NA	NA	NA	NA	NA
transporter activity	NA	NA	NA	NA	NA	NA	NA	NA	NA	NA	NA	NA	NA	NA	NA	NA	NA	NA	NA	NA	NA	NA	NA	NA	NA	NA	NA	NA	NA	2.4 (6.8e-05)	NA	2.1 (0.044575)	NA	NA	NA	NA	NA	NA	NA	NA	NA
transporter complex	NA	NA	NA	NA	NA	NA	NA	8 (3e-06)	NA	NA	NA	NA	NA	NA	NA	NA	NA	NA	NA	10.5 (0.001438)	NA	NA	NA	NA	NA	NA	NA	NA	NA	6.1 (1e-06)	NA	NA	NA	NA	NA	NA	NA	NA	NA	NA	NA
trehalose-phosphatase activity	NA	NA	NA	NA	NA	NA	NA	NA	NA	NA	NA	NA	NA	NA	NA	NA	18.8 (0.024242)	NA	NA	NA	NA	NA	NA	NA	NA	NA	NA	NA	NA	11.1 (0.024242)	NA	NA	NA	NA	NA	NA	NA	NA	NA	NA	NA
tricarboxylic acid cycle	NA	NA	NA	NA	NA	NA	NA	NA	NA	NA	NA	NA	2.5 (0.028237)	NA	NA	NA	NA	NA	NA	NA	NA	NA	NA	NA	NA	NA	NA	NA	NA	NA	NA	NA	NA	NA	NA	NA	NA	NA	NA	NA	NA
tricarboxylic acid cycle enzyme complex	NA	NA	NA	NA	NA	NA	NA	NA	NA	NA	NA	NA	4.3 (2.6e-05)	NA	NA	NA	5.1 (0.01119)	NA	NA	NA	NA	2.3 (0.039638)	5.9 (0.026585)	NA	NA	NA	NA	3.2 (0.043317)	NA	11.9 (0)	NA	NA	NA	NA	NA	NA	NA	NA	NA	NA	5.6 (0.02026)
tricarboxylic acid metabolic process	NA	NA	NA	NA	NA	NA	NA	NA	NA	NA	NA	3.6 (0.021534)	5.3 (0.000631)	NA	NA	NA	NA	NA	NA	NA	NA	NA	NA	NA	NA	NA	3.6 (0.017819)	NA	NA	9.3 (0.000343)	NA	NA	NA	NA	NA	NA	NA	NA	NA	NA	NA
tubulin complex	NA	NA	NA	NA	NA	NA	NA	NA	NA	14.3 (0.024194)	NA	4.8 (0.047994)	NA	NA	NA	NA	NA	NA	NA	NA	NA	NA	NA	100 (0.024194)	NA	NA	NA	NA	NA	NA	NA	NA	NA	NA	NA	NA	NA	NA	NA	NA	NA
tyrosine metabolic process	NA	NA	NA	NA	NA	NA	NA	NA	NA	NA	NA	NA	NA	NA	NA	NA	NA	NA	NA	NA	NA	NA	NA	NA	NA	NA	NA	NA	NA	6.4 (0.022727)	NA	NA	NA	NA	NA	NA	NA	NA	NA	NA	NA
ubiquitin-like protein conjugating enzyme activity	NA	NA	NA	NA	NA	NA	NA	NA	3.1 (0.047996)	NA	NA	NA	NA	NA	NA	NA	NA	NA	NA	NA	NA	NA	NA	NA	NA	NA	NA	NA	NA	NA	NA	NA	NA	NA	NA	NA	NA	NA	NA	NA	NA
ubiquitin-like protein conjugating enzyme binding	NA	NA	25 (0.024194)	NA	NA	NA	NA	NA	NA	NA	NA	NA	NA	NA	NA	NA	NA	NA	NA	NA	NA	NA	NA	NA	NA	NA	NA	NA	NA	NA	NA	NA	NA	NA	NA	NA	NA	3.3 (0.047897)	NA	NA	NA
ubiquitin-like protein ligase binding	NA	NA	NA	NA	NA	NA	NA	NA	NA	3 (0.032051)	NA	NA	NA	NA	NA	NA	NA	NA	NA	NA	NA	NA	NA	NA	NA	NA	NA	NA	NA	NA	NA	NA	NA	NA	NA	NA	NA	NA	NA	NA	NA
uridylyltransferase activity	16.7 (0.028037)	NA	NA	NA	NA	11.1 (0.028037)	NA	NA	NA	NA	NA	NA	NA	NA	NA	NA	NA	NA	NA	NA	NA	7.7 (0.028037)	NA	NA	NA	NA	NA	NA	NA	NA	NA	NA	10 (0.028037)	NA	NA	NA	NA	NA	2.9 (0.028037)	NA	NA
vacuolar lumen	NA	NA	NA	NA	NA	NA	3.8 (0.047222)	NA	NA	NA	NA	NA	NA	NA	NA	NA	NA	NA	NA	NA	NA	NA	NA	NA	NA	NA	NA	NA	NA	NA	NA	NA	NA	NA	NA	NA	NA	NA	NA	NA	3.1 (0.047222)
vacuolar transport	NA	NA	NA	NA	NA	NA	NA	NA	2.3 (0.034734)	NA	NA	NA	NA	NA	NA	NA	NA	NA	NA	NA	NA	NA	NA	NA	NA	4.8 (0.002852)	NA	NA	NA	NA	NA	3.4 (0.041168)	NA	NA	NA	NA	NA	NA	NA	NA	NA
vacuolar transporter chaperone complex	NA	NA	NA	NA	NA	NA	NA	NA	33.3 (0.004995)	NA	NA	NA	NA	NA	NA	NA	NA	23.1 (0.027473)	NA	NA	NA	NA	NA	NA	NA	100 (0.027473)	NA	NA	NA	NA	NA	NA	NA	NA	NA	NA	NA	NA	NA	NA	NA
vacuole organization	NA	NA	NA	NA	NA	NA	NA	NA	3 (0.042668)	NA	NA	NA	NA	NA	NA	NA	NA	NA	NA	NA	NA	NA	NA	NA	NA	5.4 (0.002641)	NA	NA	NA	NA	NA	NA	NA	NA	NA	NA	NA	NA	NA	NA	NA
vacuole-isolation membrane contact site	NA	NA	NA	NA	NA	NA	NA	NA	NA	NA	NA	NA	NA	NA	NA	NA	NA	NA	NA	NA	NA	NA	NA	NA	NA	NA	NA	5.4 (0.00592)	NA	NA	NA	NA	NA	NA	NA	NA	NA	NA	NA	NA	NA
vesicle	NA	NA	NA	NA	NA	NA	NA	NA	NA	NA	NA	NA	NA	NA	NA	NA	NA	NA	NA	2.4 (0.00865)	NA	NA	NA	NA	NA	NA	NA	NA	NA	NA	NA	NA	NA	NA	NA	NA	NA	NA	NA	NA	NA
viral process	NA	NA	NA	NA	NA	NA	NA	NA	NA	NA	NA	NA	NA	NA	NA	100 (0.017135)	NA	NA	NA	NA	NA	NA	NA	NA	NA	NA	NA	NA	NA	NA	NA	NA	NA	NA	NA	NA	NA	NA	NA	NA	NA
vitamin binding	2.9 (0.007337)	NA	NA	NA	NA	NA	2.2 (0.030787)	3.8 (0.006664)	NA	2.5 (0.024627)	NA	NA	NA	NA	NA	NA	3.8 (0.005418)	NA	NA	NA	NA	NA	3.8 (0.01453)	21.4 (0.000614)	NA	16 (0.000493)	NA	NA	NA	NA	33.3 (0.026974)	NA	NA	NA	NA	NA	3.2 (0.019209)	NA	NA	30 (0.004771)	2.9 (0.030872)
vitamin transport	NA	NA	NA	NA	NA	NA	NA	NA	NA	NA	NA	NA	NA	NA	NA	NA	NA	NA	NA	NA	NA	NA	NA	33.3 (0.042762)	NA	NA	2.6 (0.036811)	NA	NA	NA	NA	NA	NA	NA	NA	NA	NA	NA	NA	NA	NA
xenobiotic transport	NA	NA	NA	NA	NA	NA	NA	NA	NA	NA	NA	NA	NA	6.7 (0.042762)	NA	NA	NA	NA	NA	NA	NA	NA	NA	NA	NA	NA	2.6 (0.036811)	NA	NA	NA	NA	NA	NA	20 (0.008689)	NA	NA	NA	NA	NA	NA	NA
xylulose 5-phosphate metabolic process	NA	NA	NA	NA	NA	NA	NA	NA	NA	NA	NA	NA	NA	NA	NA	NA	NA	NA	NA	NA	NA	NA	NA	NA	NA	NA	NA	16.7 (0.042056)	NA	NA	NA	NA	NA	NA	NA	NA	NA	NA	NA	NA	NA
xylulose 5-phosphate metabolic process	NA	NA	NA	NA	NA	NA	NA	NA	NA	NA	NA	NA	NA	NA	NA	NA	NA	NA	NA	NA	NA	NA	NA	NA	NA	NA	NA	16.7 (0.042056)	NA	NA	NA	NA	NA	NA	NA	NA	NA	NA	NA	NA	NA
