# Supplementary material for: Transcription elongation is finely tuned by dozens of regulatory factors
Source: eLife. 2022 May 16;11:e78944. doi: 10.7554/eLife.78944 (PMC9154744; doi:10.7554/eLife.78944)
Supplement: Supplementary file 4. [file elife-78944-supp4.xlsx]

## Sheet: Sheet1
Supplemental File 4. Significant motifs underlying pauses across deletion strains with transcription factor binding site matches.
Deletion strain	Sequence motif	Motif ID	Pause Motif				Top TomTom Match
			E-value	Site count	Relative entropy	Log likelihood ratio	Transcription factor	E-value
bre1∆	HDNNRDDAVNAKGDNNNNNNN	bre1 (M1)	8.3e-35	3359	2.6	5969
	TDHYMAARRAKKDNDNNNHH	bre1 (M2)	0.0034	352	7	1703	Sfp1	0.000750596
bur2∆	HNNNNAAVGMTRDNDNNDH	bur2 (M1)	1.7e-93	4900	3.6	12264
bye1∆	HNDNDAARGMTRNHNNHDHH	bye1 (M1)	1.1e-139	3727	4.3	11044	Skn7	0.00023
cbc1∆	CAWSRDTTTBYY	cbc1 (M1)	0.0006	394	5.8	1581
	AAAAWATAKKW	cbc1 (M2)	0.047	58	11.3	456
ccr4∆	HRVVAAANGMTRBHNHHDHW	ccr4 (M1)	1.1e-603	11296	3.8	29520
cdc39∆	BHDNYAKCYTTHHHNWW	cdc39 (M1)	9.7e-09	1372	4.9	4652
	WWWWWWWTATWTWWWWWWW	cdc39 (M2)	0.00063	583	5.5	2213	Nhp6b	1.2e-07
cdc73∆	MAWDGVTRNYDHN	cdc73 (M1)	0.0004	414	5.4	1537
	TATRAA	cdc73 (M2)	0.033	35	9.6	232
chd1∆	DRAARKATGKHNNDHNN	chd1 (M1)	8.3e-29	2884	4.2	8310
ctr9∆	NWRNNAWRBNATGKWNNNNHH	ctr9 (M1)	3.8e-29	2654	2.8	5152
	GGTGCTG	ctr9 (M2)	0.041	26	14.9	269
dhh1∆	GGTGCY	dhh1(M1)	3.8e-09		10.2	1275
dst1∆	RMMATRDYTTYTYY	dst1 (M1)	2e-29	2083	5.4	7845
	GTAYGT	dst1 (M2)	0.024	150	10.2	1056
eaf1∆	DHBGNTRWKGCTRHYRNWDHN	eaf1 (M1)	0.00016	326	5	1121	Skn7	2.6e-05
	TWWTTT	eaf1 (M2)	0.049	267	7.1	1307
elf1∆	WNNNNAAVGATGDHDVNDD	elf1 (M1)	3.4e-69	3009	4.6	9693
	TTGGTGGTGCY	elf1 (M2)	0.015	70	16.9	822
hda1∆	NDNNNNHCHTDBYWHHDNHR	hda1 (M1)	8e-109	6363	3	13359
hpc2∆	WWWNNDMCAKMNTTHNNNWA	hpc2 (M1)	8.8e-55	2217	3.5	5307
htz1∆	NNDVCATMVTTHNNNWA	htz11 (M1)	5.5e-321	16303	3.6	40179
ino80∆	HNNNWAANGRTGNYNNHDNW	ino80 (M1)	1.8e-79	2586	3.7	6662
	TCTGTAG	ino80 (M2)	0.019	36	13.5	336
isw1∆	HNRMMATVNYTYHNNHA	isw1 (M1)	8.6e-45	2489	4	6973
isw2∆	NNDMCWTVSTTYNNNHA	isw2 (M1)	1.1e-25	2591	3.9	7071
leo1∆	WDNNRDDRVYADGDHNNNHDN	leo1 (M1)	1.8e-54	7164	2.3	11406
nap1∆	WDNNNDARNKATDNHNNHNNH	nap1 (M1)	2.5e-06	730	2.3	1184
npl3∆	HDNBNWHYHTDBYWNHDNHR	npl3 (M1)	1.9e-165	9339	2.9	18974
paf1∆	NNNNAANGVTGBYNNHDHH	paf1 (M1)	6.3e-63	9936	4	9936
rad6∆	HNRNAAARGMTRNHNVHDHH	rad6 (M1)	2.6e-100	3142	4.3	9408
	DNWHHWWHDRGTATGTTWAA	rad6 (M2)	0.037	65	12.4	558	Tec1	0.034
	AWAWAMATWTTA	rad6 (M6)	0.018	49	12.8	434	Sum1	0.049
rco1∆	WNNDNYATMBTTYHWHWW	rco1 (M1)	2e-86	5621	3.6	14184
	AKAASTWAC	rco1 (M2)	0.044	20	13.6	188
rpb4∆	HVVRAAARGVTRNYDNHDHH	rpb4 (M1)	8.7e-18	752	5.3	2773	Skn7	0.0012
rph1∆	ASKATG	rph1 (M1)	9.5e-15	2831	5.1	9964
rsc30∆	DDWRVYAWGDDHNDHNN	rsc30 (M1)	2.2e-58	11377	3.3	26089
rtf1∆	WANNVWARNKMTRDWNNWDHW	rtf1 (M1)	4.9e-13	2148	2.8	4125
	DNRNHVDYARCCTTTBTVAA	rtf1 (M2)	0.0042	154	10.2	1089	Stp4	0.024
rtt103∆	HNNNDHYATMYTTHNNNWD	rtt103 (M1)	2e-205	10790	3.1	23435
set2∆	WDNNRKDRBNATGDHNNNNHN	set2 (M1)	5.5e-73	4875	2.9	9767
	TAAWATAAWW	set2 (M2)	0.067	105	12.2	890
	RRCVAHANMTGGRKYAVCRR	set2 (M4)	0.012	132	11.1	1018	Put3	0.0045
	DDHCWWCAAYANTTTVKHMR	set2 (M5)	0.025	114	10.5	833	Nhp6b	0.018
set3∆	WWNNNDAAVKMTRNHNNHDHH	set3 (M1)	2.4e-47	3263	2.9	6478
spt4∆	HDNYDNCATCCTTTBNNWW	spt4 (M1)	8.7e-21	541	6.1	2291	Hsf1	0.013
swr1∆	WWDNNDNCATMNTTYNNNNW	swr1 (M1)	3.2e-56	1923	3.9	5194
upb8∆	HHAAVAAVGRTGNYDHWDHH	upb8 (M1)	1.2e-15	651	4.9	2209
	TTATWA	upb8 (M2)	0.0016	109	8.7	657
vps15∆	WNNNNAAVGATRRNDNND	vsp15 (M1)	3.3e-472	16314	3.6	40597
vps34∆	HNDTACCATMTTT	vsp34 (M1)	6.9e-12	2698	4.2	7857
wildtype	WDNBRWDABKATGDHNNNNNH	wildtype (M1)	1.8e-70	5395	3.1	11465
	DNBNWNYATNBTTBRDHAA	wildtype (M2)	1.5e-12	1184	6.3	5138	Nhp6b	0.02
	WWWWWWWWATAWAWWAWWAA	wildtype (M3)	0.00069	488	8.6	2908	Nhp6b	1.8e-08
