# Supplementary material for: Transcription elongation is finely tuned by dozens of regulatory factors
Source: eLife. 2022 May 16;11:e78944. doi: 10.7554/eLife.78944 (PMC9154744; doi:10.7554/eLife.78944)
Supplement: Supplementary file 5. [file elife-78944-supp5.xlsx]

## Sheet: Sheet1
Supplemental File 5. Source of chromatin features used in random forest classifier.
Chromatin Feature	Feature Category	Source	Notes
-2 nucleotide	Nucleotide sequence
-1 nucleotide	Nucleotide sequence
Pause nucleotide	Nucleotide sequence
+1 nucleotide	Nucleotide sequence
+2 nucleotide	Nucleotide sequence
-2 to -1 dinucleotide	Nucleotide sequence
-1 to pause dinucleotide	Nucleotide sequence
Pause to +1 dinucleotide	Nucleotide sequence
+1 to +2 dinucleotide	Nucleotide sequence
% GC content	Nucleotide sequence		Calculated from 21 bp sequence (±10 bp surrounding each pause)
DMS-seq	DNA shape	Umeyama and Ito 2018	DMS-seq from wildtype budding yeast, in vivo, 3% DMS
DNA electrostatic potential	DNA shape	Chiu et al. 2016	Prediction at single-nucleotide pause generated using DNAshapeR R package with 21 bp sequence input (±10 bp surrounding each pause)
DNA minor groove width	DNA shape	Chiu et al. 2016	Prediction at single-nucleotide pause generated using DNAshapeR R package with 21 bp sequence input (±10 bp surrounding each pause)
DNA helix twist	DNA shape	Chiu et al. 2016	Prediction at single-nucleotide pause generated using DNAshapeR R package with 21 bp sequence input (±10 bp surrounding each pause)
DNA propeller twist	DNA shape	Chiu et al. 2016	Prediction at single-nucleotide pause generated using DNAshapeR R package with 21 bp sequence input (±10 bp surrounding each pause)
DNA roll	DNA shape	Chiu et al. 2016	Prediction at single-nucleotide pause generated using DNAshapeR R package with 21 bp sequence input (±10 bp surrounding each pause)
Melting temperature	DNA shape	Turner and Mathews 2010	Prediction for 21 bp sequence (±10 bp surrounding each pause) made using the TmCalculator R package using nearest neighbor thermodynamics
% gene body	Position within genes
Distance to TSS	Position within genes	Pelechano et al. 2013	Most abundant TSS and polyadenulation site used
Distance to pA site	Position within genes	Pelechano et al. 2013	Most abundant TSS and polyadenulation site used
MNase-seq	Chromatin landscape	Oberbeckmann et al. 2019	Mnase-seq from wildtype budding yeast
H3K4me ChIP-seq	Chromatin landscape	Weiner et al. 2015	ChIP-seq from untreated wildtype budding yeast
H3K4me2 ChIP-seq	Chromatin landscape	Weiner et al. 2015	ChIP-seq from untreated wildtype budding yeast
H3K4me3 ChIP-seq	Chromatin landscape	Weiner et al. 2015	ChIP-seq from untreated wildtype budding yeast
H3K36me ChIP-seq	Chromatin landscape	Weiner et al. 2015	ChIP-seq from untreated wildtype budding yeast
H3K36me2 ChIP-seq	Chromatin landscape	Weiner et al. 2015	ChIP-seq from untreated wildtype budding yeast
H3K36me3 ChIP-seq	Chromatin landscape	Weiner et al. 2015	ChIP-seq from untreated wildtype budding yeast
H3K79me ChIP-seq	Chromatin landscape	Weiner et al. 2015	ChIP-seq from untreated wildtype budding yeast
H3K79me3 ChIP-seq	Chromatin landscape	Weiner et al. 2015	ChIP-seq from untreated wildtype budding yeast
H4R3me ChIP-seq	Chromatin landscape	Weiner et al. 2015	ChIP-seq from untreated wildtype budding yeast
H4R3me2s ChIP-seq	Chromatin landscape	Weiner et al. 2015	ChIP-seq from untreated wildtype budding yeast
H4K20me ChIP-seq	Chromatin landscape	Weiner et al. 2015	ChIP-seq from untreated wildtype budding yeast
H2AK5ac ChIP-seq	Chromatin landscape	Weiner et al. 2015	ChIP-seq from untreated wildtype budding yeast
H3K4ac ChIP-seq	Chromatin landscape	Weiner et al. 2015	ChIP-seq from untreated wildtype budding yeast
H3K9ac ChIP-seq	Chromatin landscape	Weiner et al. 2015	ChIP-seq from untreated wildtype budding yeast
H3K14ac ChIP-seq	Chromatin landscape	Weiner et al. 2015	ChIP-seq from untreated wildtype budding yeast
H3K18ac ChIP-seq	Chromatin landscape	Weiner et al. 2015	ChIP-seq from untreated wildtype budding yeast
H3K23ac ChIP-seq	Chromatin landscape	Weiner et al. 2015	ChIP-seq from untreated wildtype budding yeast
H3K27ac ChIP-seq	Chromatin landscape	Weiner et al. 2015	ChIP-seq from untreated wildtype budding yeast
H3K56ac ChIP-seq	Chromatin landscape	Weiner et al. 2015	ChIP-seq from untreated wildtype budding yeast
H4K5ac ChIP-seq	Chromatin landscape	Weiner et al. 2015	ChIP-seq from untreated wildtype budding yeast
H4K8ac ChIP-seq	Chromatin landscape	Weiner et al. 2015	ChIP-seq from untreated wildtype budding yeast
H4K12ac ChIP-seq	Chromatin landscape	Weiner et al. 2015	ChIP-seq from untreated wildtype budding yeast
H4K16ac ChIP-seq	Chromatin landscape	Weiner et al. 2015	ChIP-seq from untreated wildtype budding yeast
H2AS129ph ChIP-seq	Chromatin landscape	Weiner et al. 2015	ChIP-seq from untreated wildtype budding yeast
H3S10ph ChIP-seq	Chromatin landscape	Weiner et al. 2015	ChIP-seq from untreated wildtype budding yeast
htz1 ChIP-seq	Chromatin landscape	Weiner et al. 2015	ChIP-seq from untreated wildtype budding yeast
Nearest nucleosome	Chromatin landscape	Weiner et al. 2015	Nucleosome centers as determined in paper
Ser2 CTD ChIP-exo	Pol II CTD modifications	Vinayachandran et al. 2018	Combined replicates form mock heatshock treatment, raw data processed with GeneTrack peak caller (-s 5 -e 10)
Ser5 CTD ChIP-exo	Pol II CTD modifications	Vinayachandran et al. 2018	Combined replicates form mock heatshock treatment, raw data processed with GeneTrack peak caller (-s 5 -e 10)
Ser7 CTD ChIP-exo	Pol II CTD modifications	Vinayachandran et al. 2018	Combined replicates form mock heatshock treatment, raw data processed with GeneTrack peak caller (-s 5 -e 10)
