# Supplementary material for: Transcription elongation is finely tuned by dozens of regulatory factors
Source: eLife. 2022 May 16;11:e78944. doi: 10.7554/eLife.78944 (PMC9154744; doi:10.7554/eLife.78944)
Supplement: Supplementary file 6. — For each numeric chromatin feature, the t-value, p-value, and indication of significance is given resulting from a Student’s t-test comparing the distribution of values surrounding real and shuffled control pauses. Table corresponds to boxplots illustrating distributions for all numeric chromatin features (Figure 5—figure supplement 1). Significance indicators are applied after a Bonferroni correction for multiple hypotheses (*<0.05, **<0.01, ***<0.001). [file elife-78944-supp6.xlsx]

## Sheet: Sheet1
	Supplemental File 6. Results of t-test between distributions of feature values comparing real and shuffled control pauses
	Chromatin Feature	t-value	p-value	Significance			For each numeric chromatin feature, the t-value, p-value, and indication of significance is given resulting from a Student’s t-test comparing the distribution of values surrounding real and shuffled control pauses. Table corresponds to boxplots illustrating distributions for all numeric chromatin features (Figure 5 - figure supplement 1). Significance indicators are applied after a Bonferroni cor…
	% GC content	-3.2202	0.001283	**
	DMS-seq	8.5644	< 2.2E-16	***
	DNA electrostatic potential	5.6272	1.85e-08	***
	DNA minor groove width	8.79	< 2.2E-16	***
	DNA helix twist	-23.635	< 2.2E-16	***
	DNS propeller twist	7.0313	2.094e-12	***
	DNA roll	-0.85553	0.3923
	DNA melting temperature	-4.2258	2.388e-05	***
	% gene body	-11.199	< 2.2E-16	***
	Distance to TSS	-10.255	< 2.2E-16	***
	Distance to pA site	6.2256	4.864e-10	***
	MNase-seq	2.9539	0.003141	**
	H3K4me ChIP-seq	-13.648	< 2.2E-16	***
	H3K4me2 ChIP-seq	-8.0914	6.136e-16	***
	H3K4me3 ChIP-seq	8.0655	7.581e-16	***
	H3K36me ChIP-seq	2.5757	0.01001	*
	H3K36me2 ChIP-seq	-4.0025	6.283e-05	***
	H3K36me3 ChIP-seq	-12.829	< 2.2E-16	***
	H3K79me ChIP-seq	-3.2128	0.001316	**
	H3K79me3 ChIP-seq	-4.8852	1.039e-06	***
	H4R3me ChIP-seq	-5.9898	2.126e-09	***
	H4R3me2s ChIP-seq	-7.9351	2.181e-15	***
	H4K20me ChIP-seq	-9.289	< 2.2E-16	***
	H2AK5ac ChIP-seq	6.0038	1.951e-09	***
	H3K4ac ChIP-seq	5.8715	4.369e-09	***
	H3K9ac ChIP-seq	4.4457	8.793e-06	***
	H3K14ac ChIP-seq	6.5854	4.618e-11	***
	H3K18ac ChIP-seq	8.4813	< 2.2E-16	***
	H3K23ac ChIP-seq	4.697	2.653e-06	***
	H3K27ac ChIP-seq	0.9254	0.3548
	H3K56ac ChIP-seq	3.34	0.0008388	***
	H4K5ac ChIP-seq	2.7375	0.006195	**
	H4K8ac ChIP-seq	0.94	0.3472
	H4K12ac ChIP-seq	1.8981	0.0577
	H4K16ac ChIP-seq	-3.9414	8.119e-05	***
	H2AS129ph ChIP-seq	-2.4674	0.01362	*
	H3S10ph ChIP-seq	-3.1953	0.001398	**
	htz1 ChIP-seq	-2.3533	0.01861	*
	Nearest nucleosome	3.1435	0.001671	**
	Ser2P CTD ChIP-exo	1.1909	0.2337
	Ser5P CTD ChIP-exo	-1.0265	0.3047
	Ser7P CTD ChIP-exo	1.5818	0.1137
