# Supplementary figures and images for: Transcription elongation is finely tuned by dozens of regulatory factors
Source: eLife journal article supplement (doi:10.7554/elife.78944), 2022-05-16

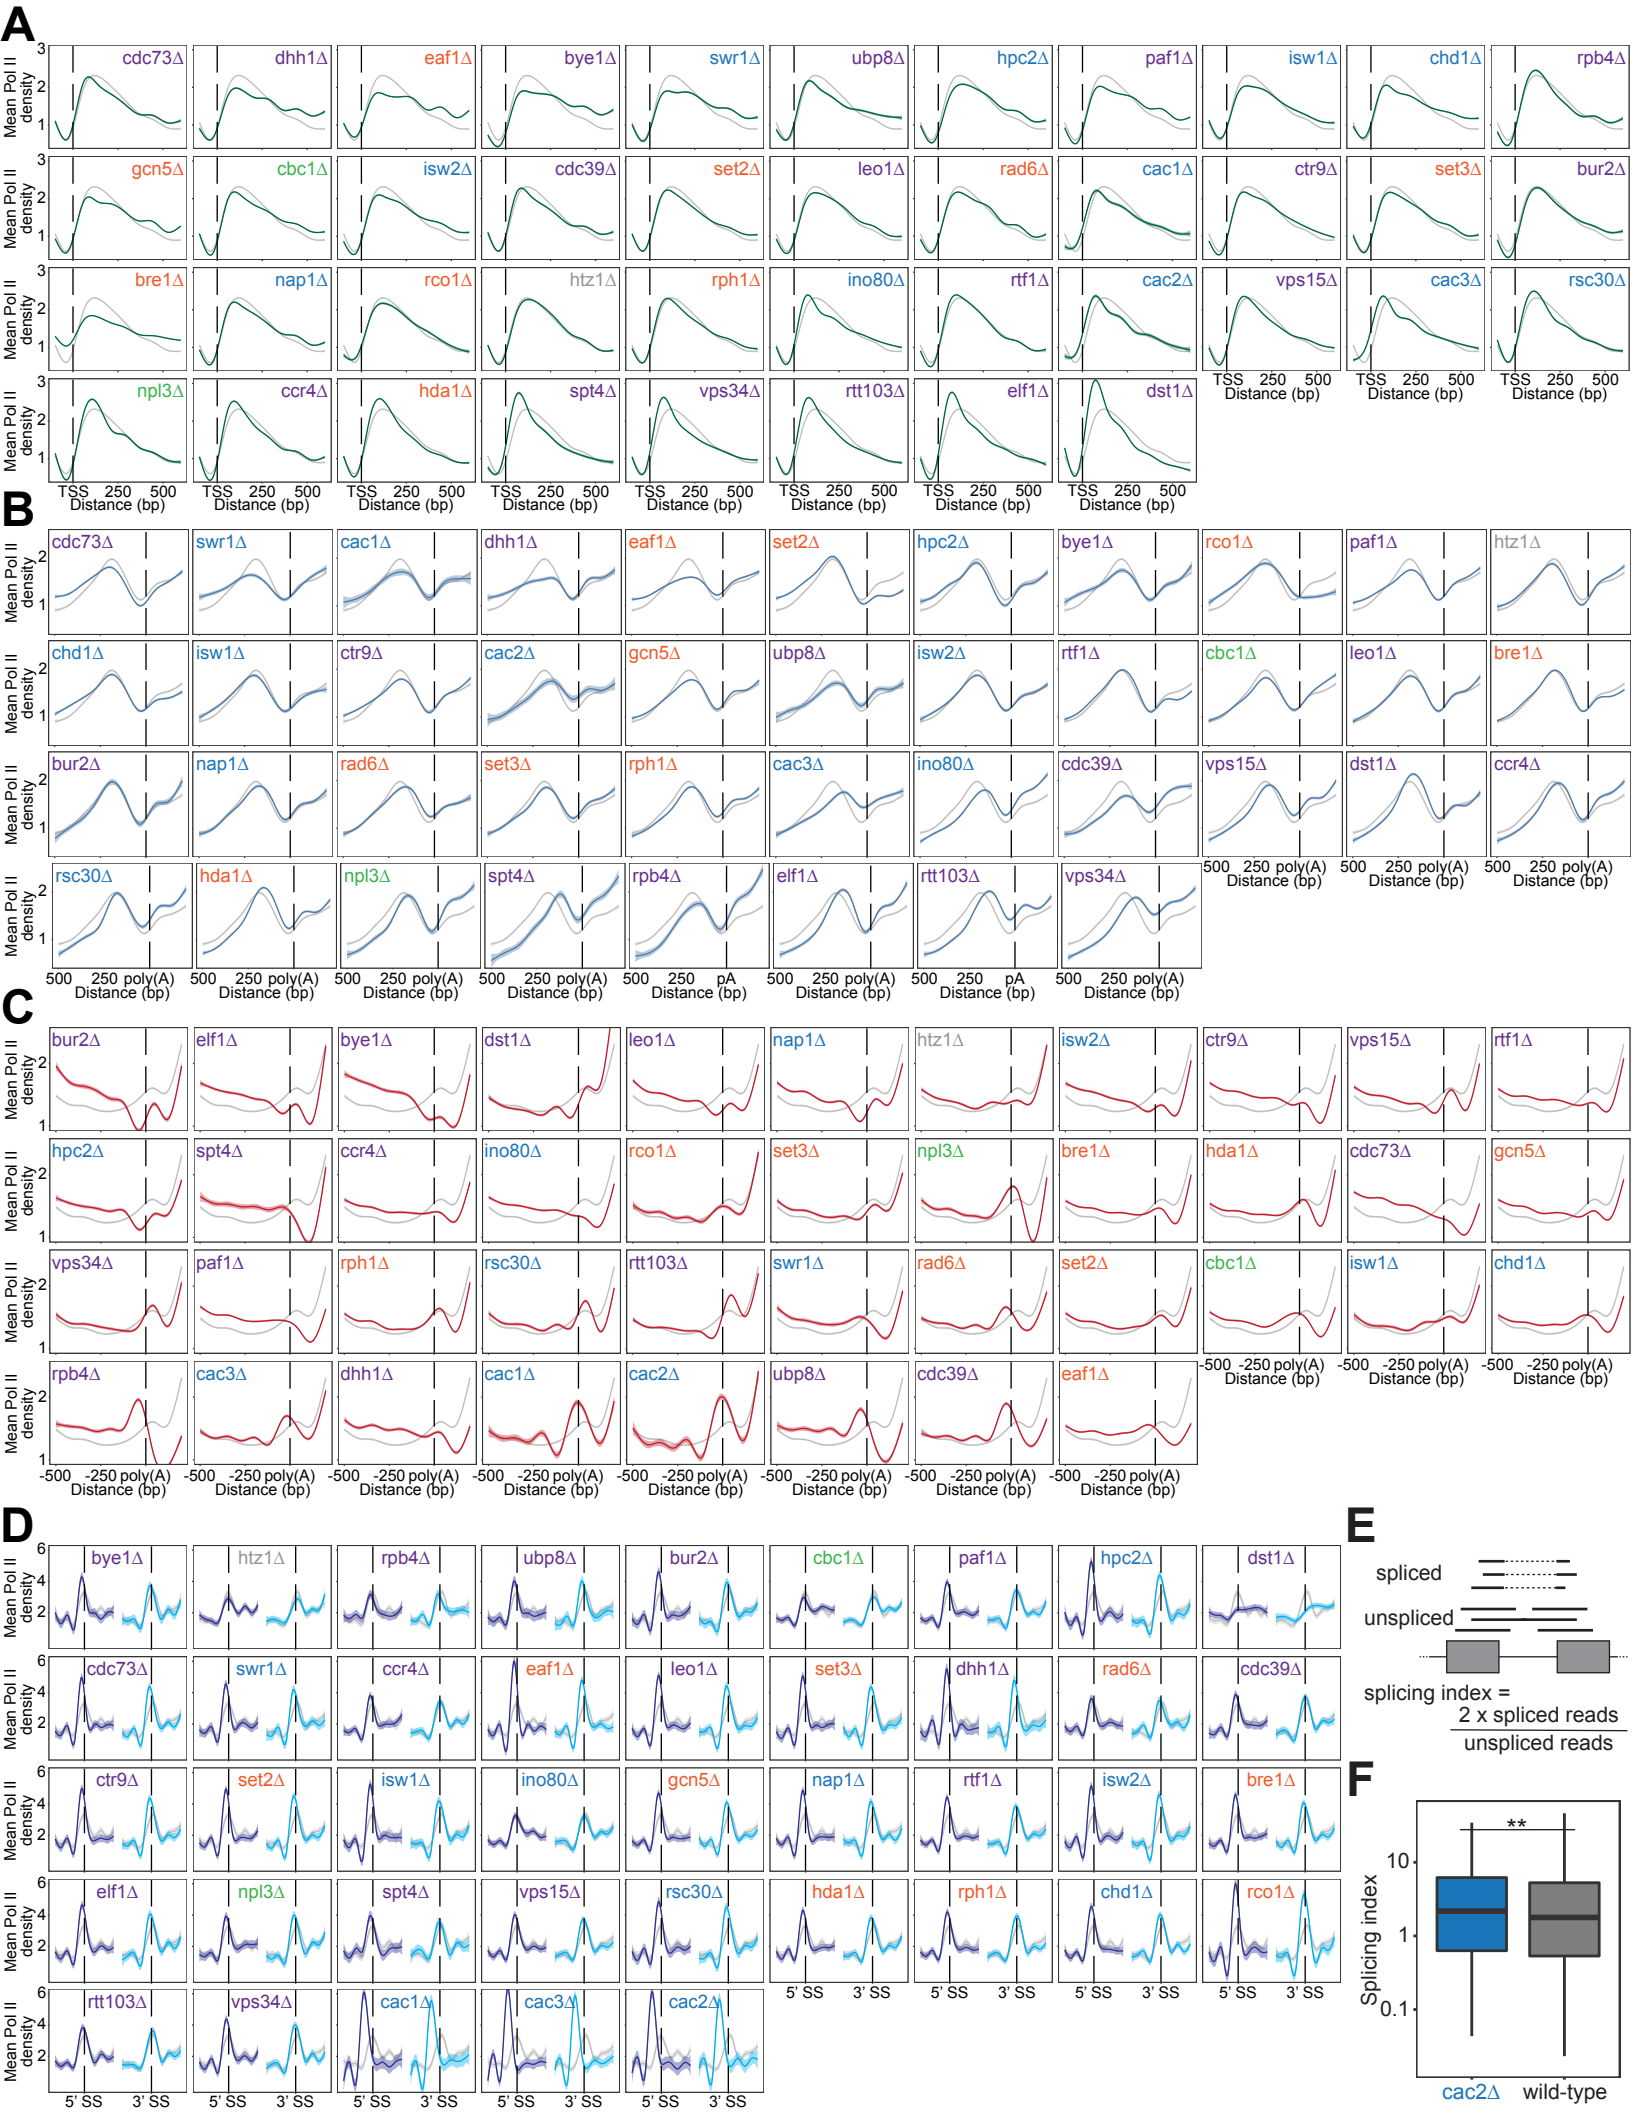

Supplement: supp [file elife-78944-supp-v1.zip]

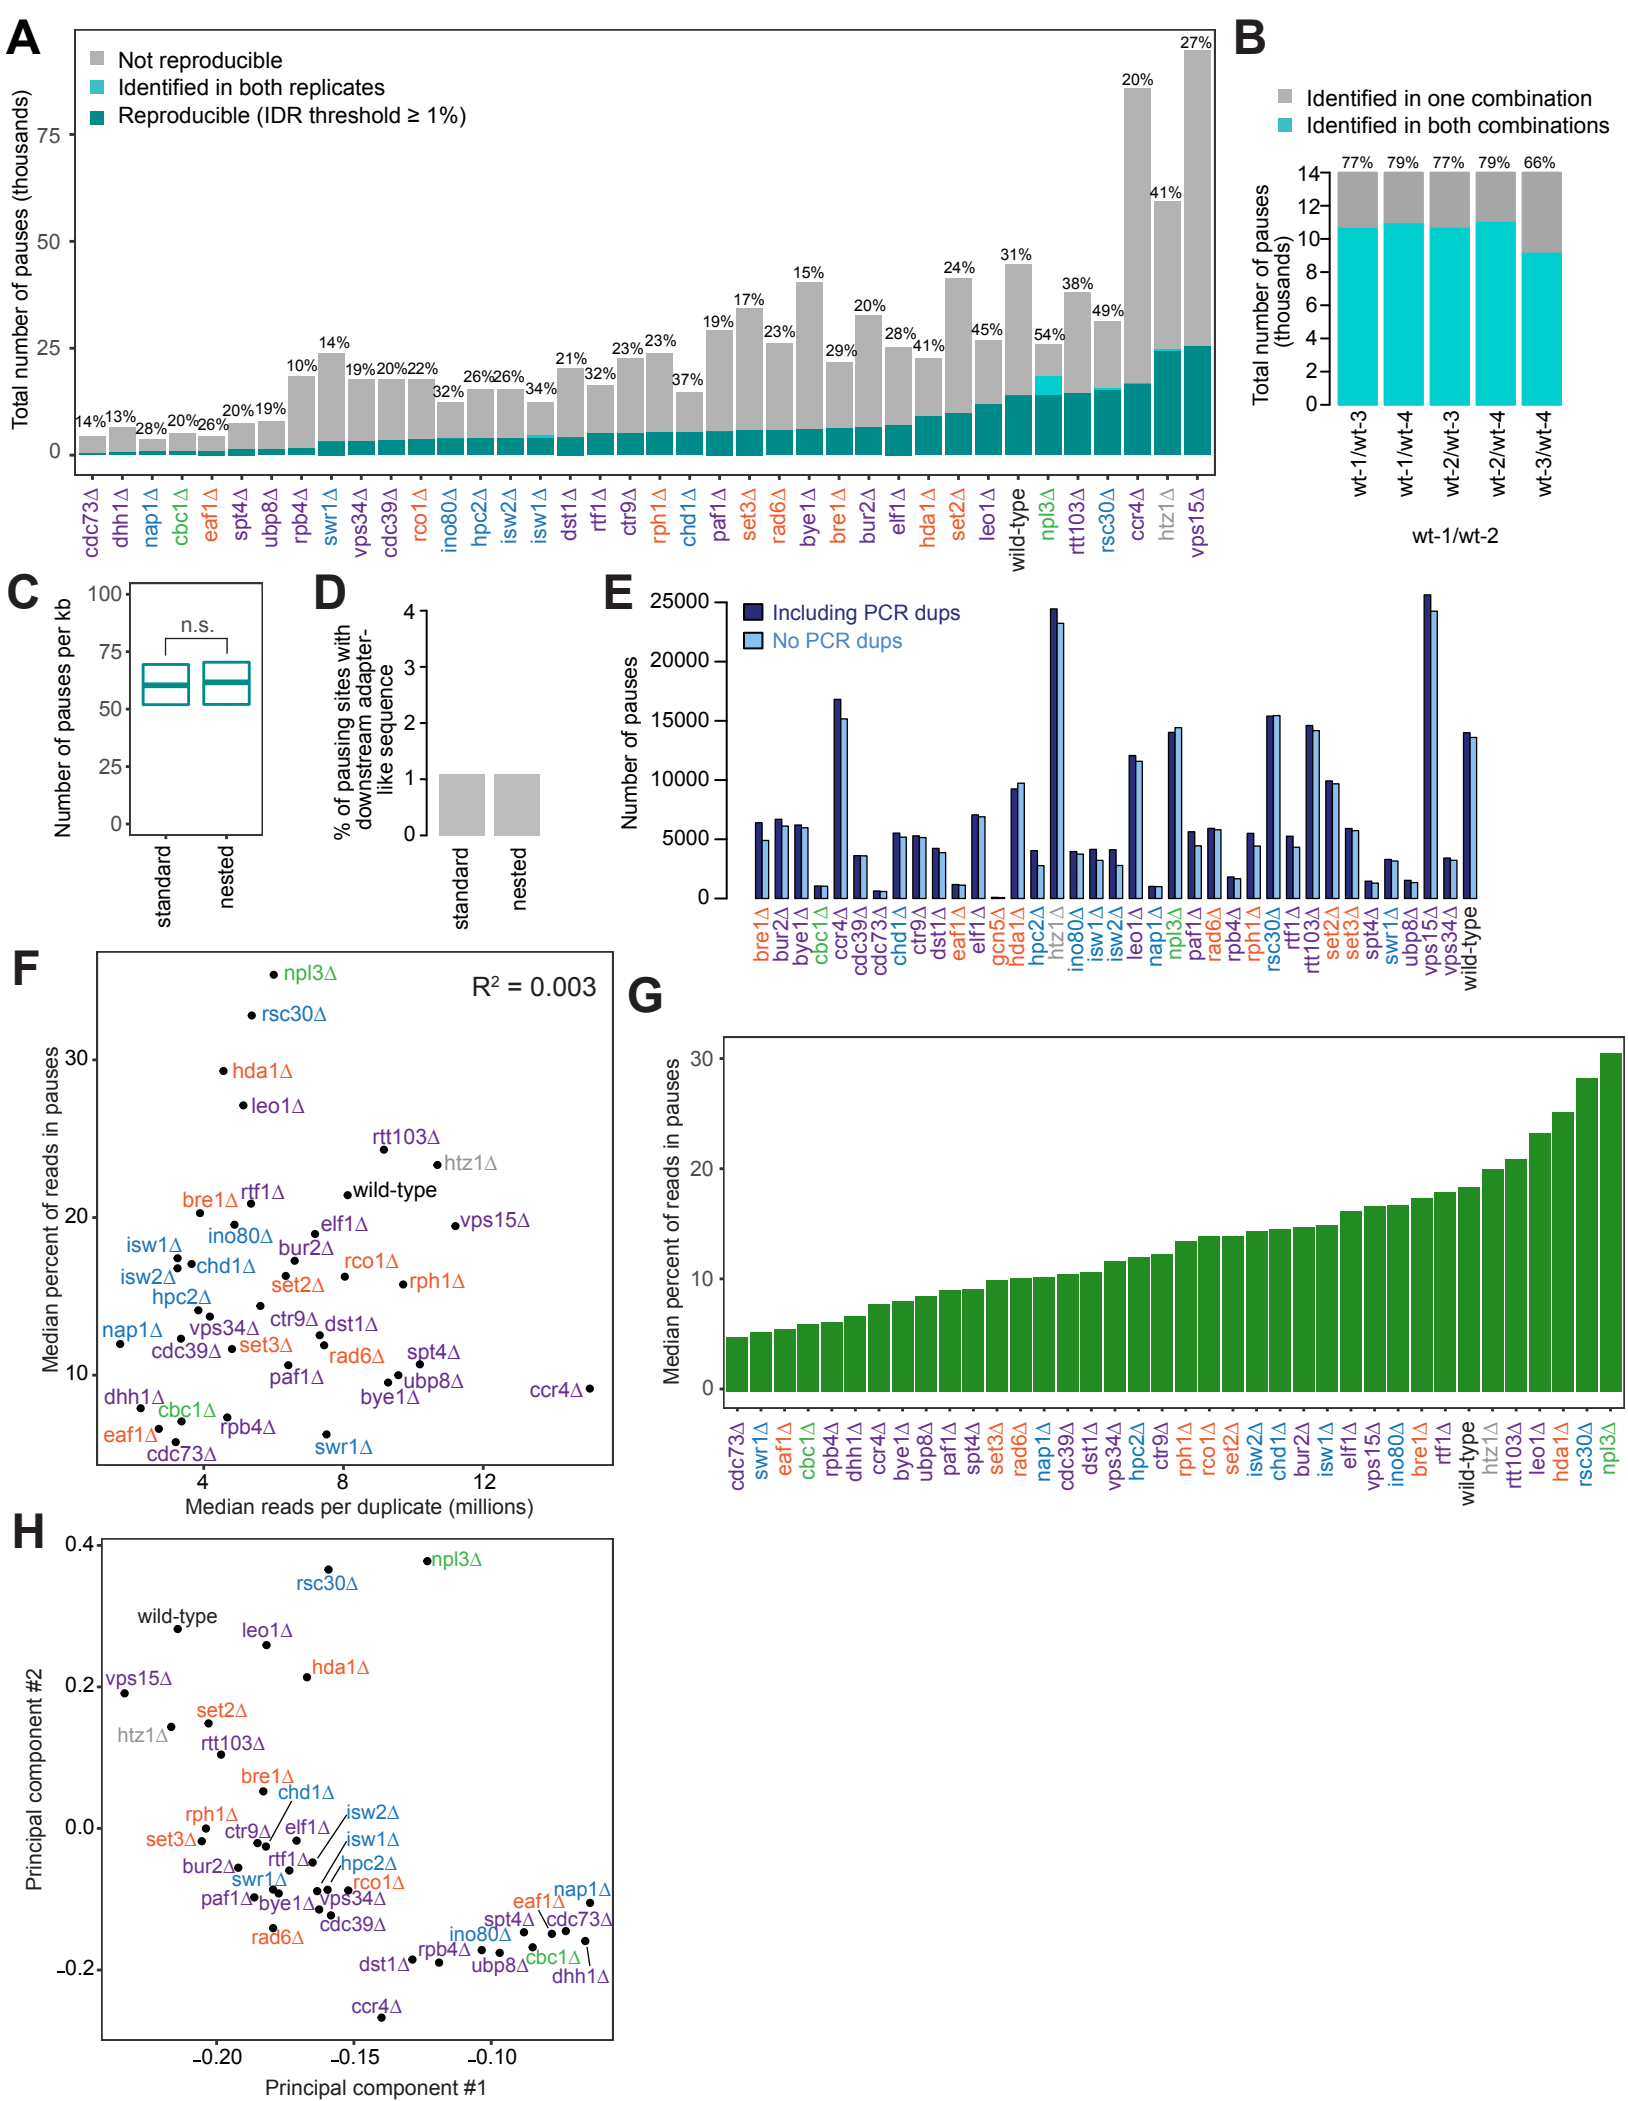

Supplement: supp [file elife-78944-supp-v1.zip]

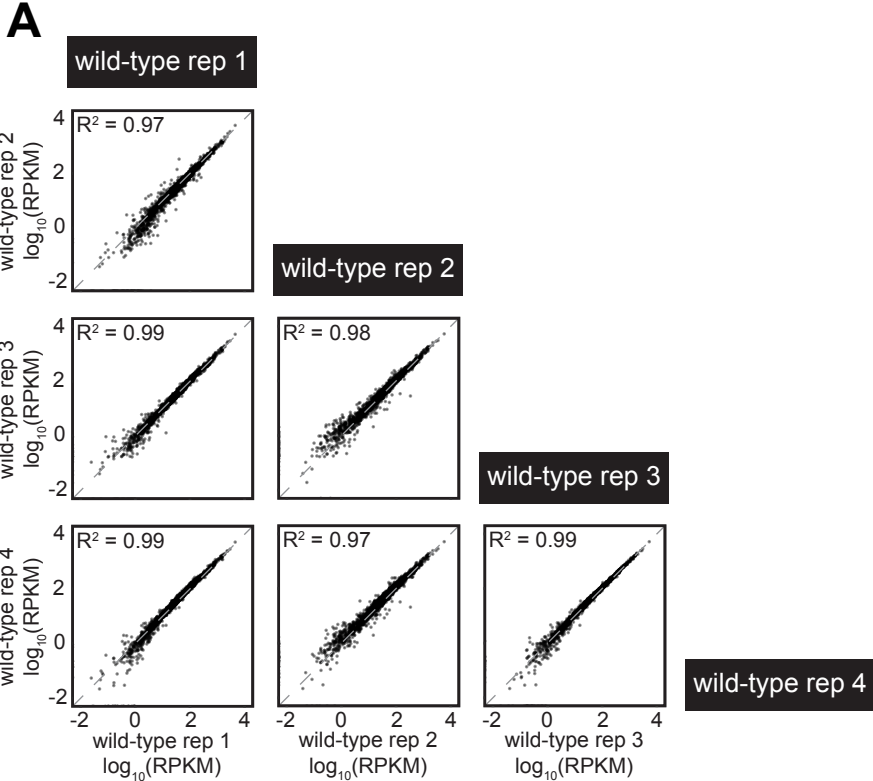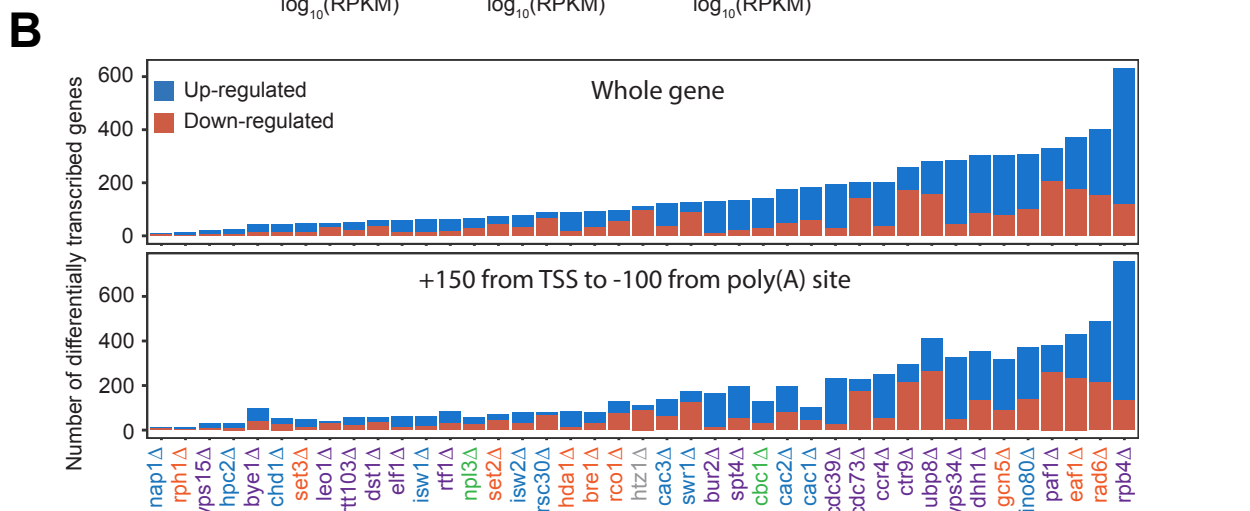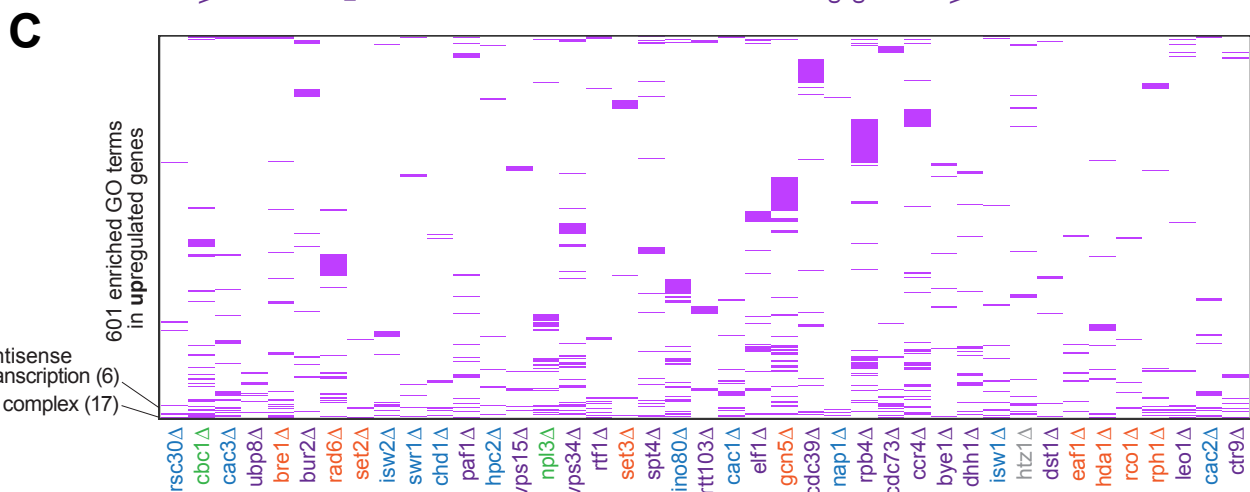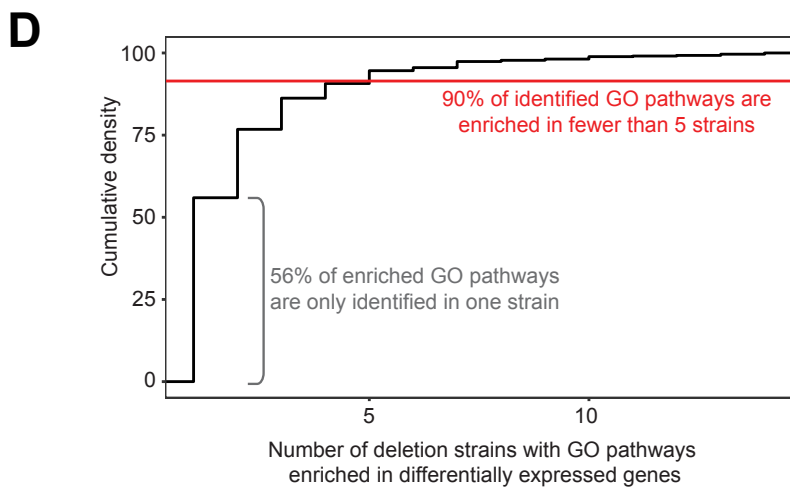

Supplement: supp [file elife-78944-supp-v1.zip]

**A**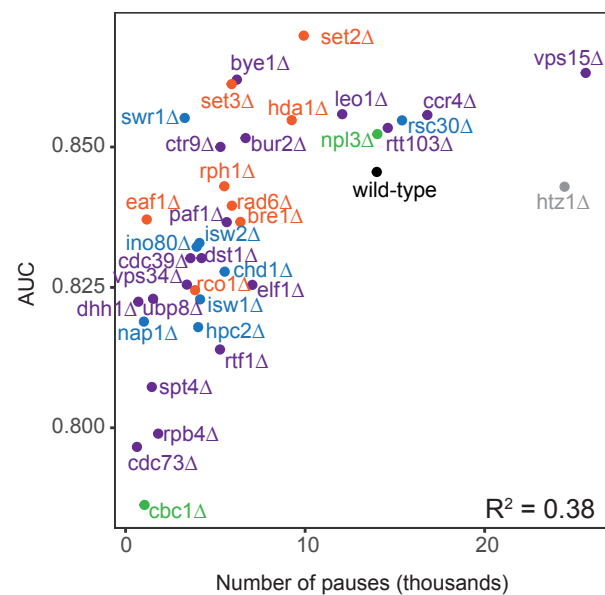**B**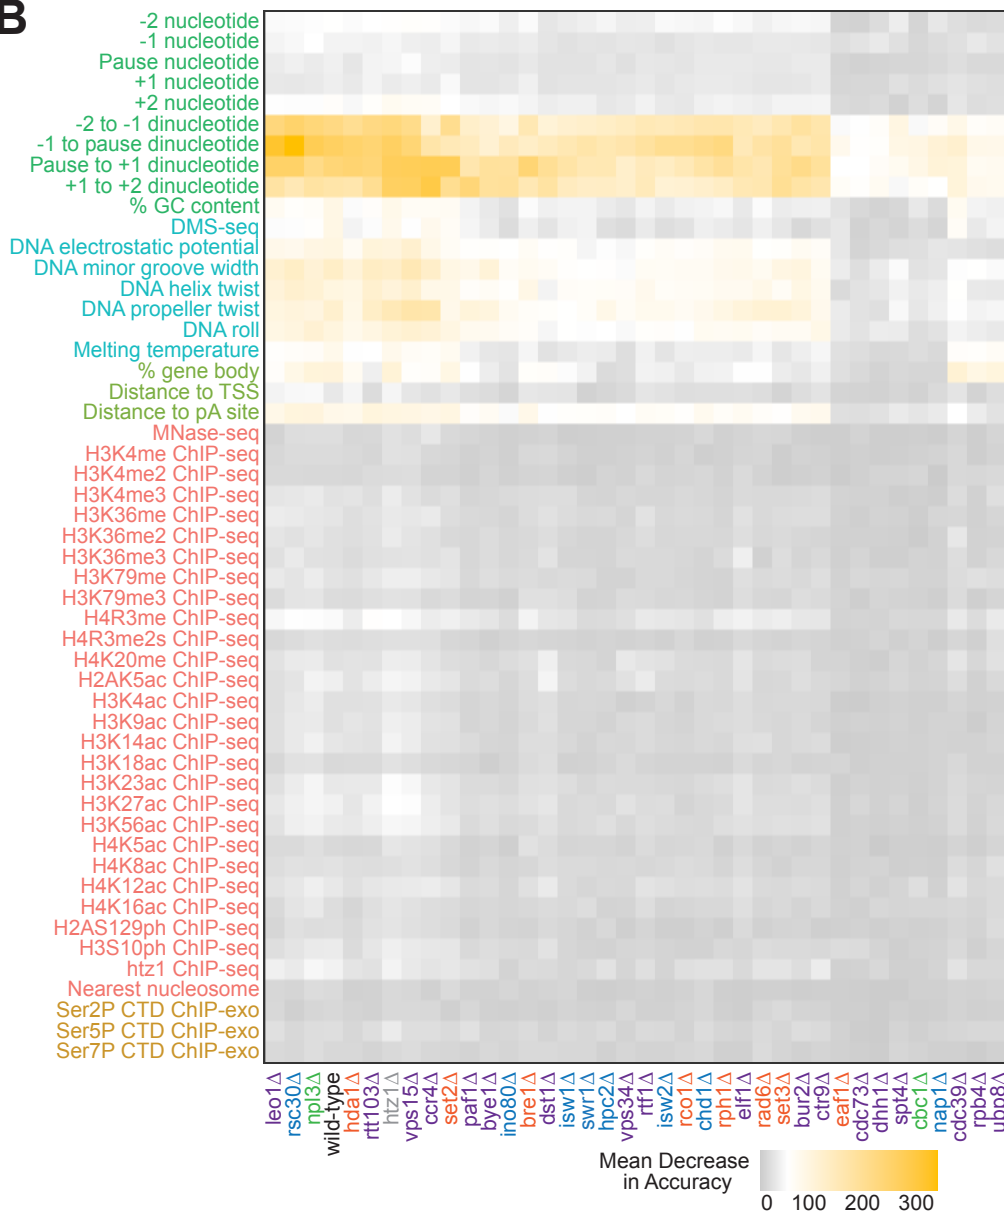**C**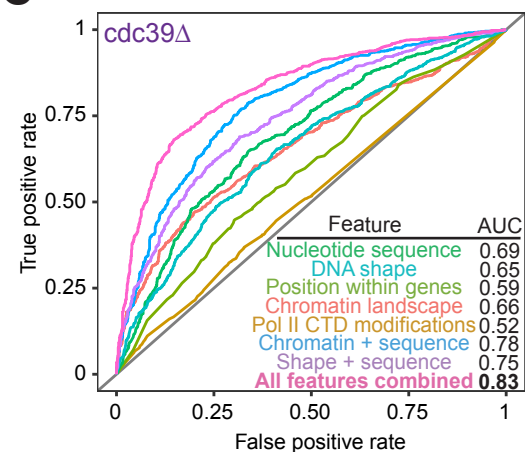**D**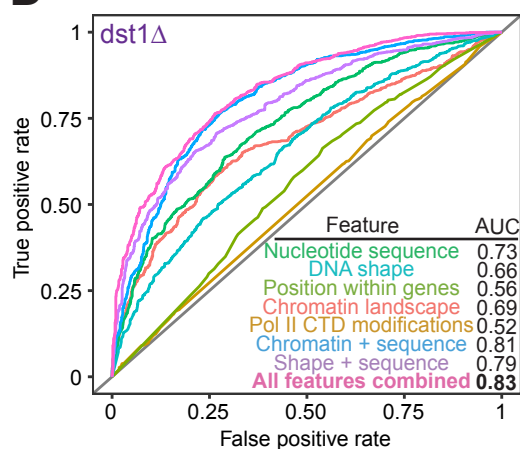**E**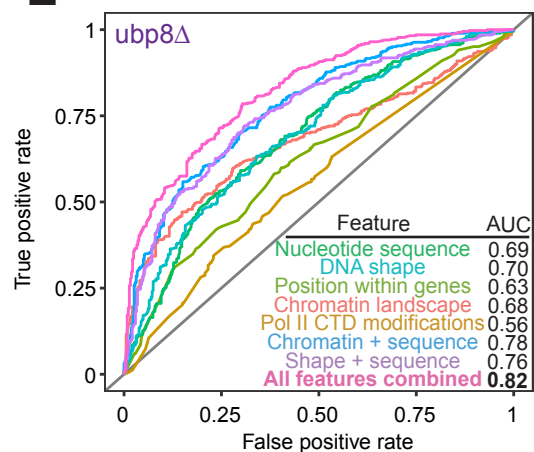

Supplement: supp [file elife-78944-supp-v1.zip]

**A**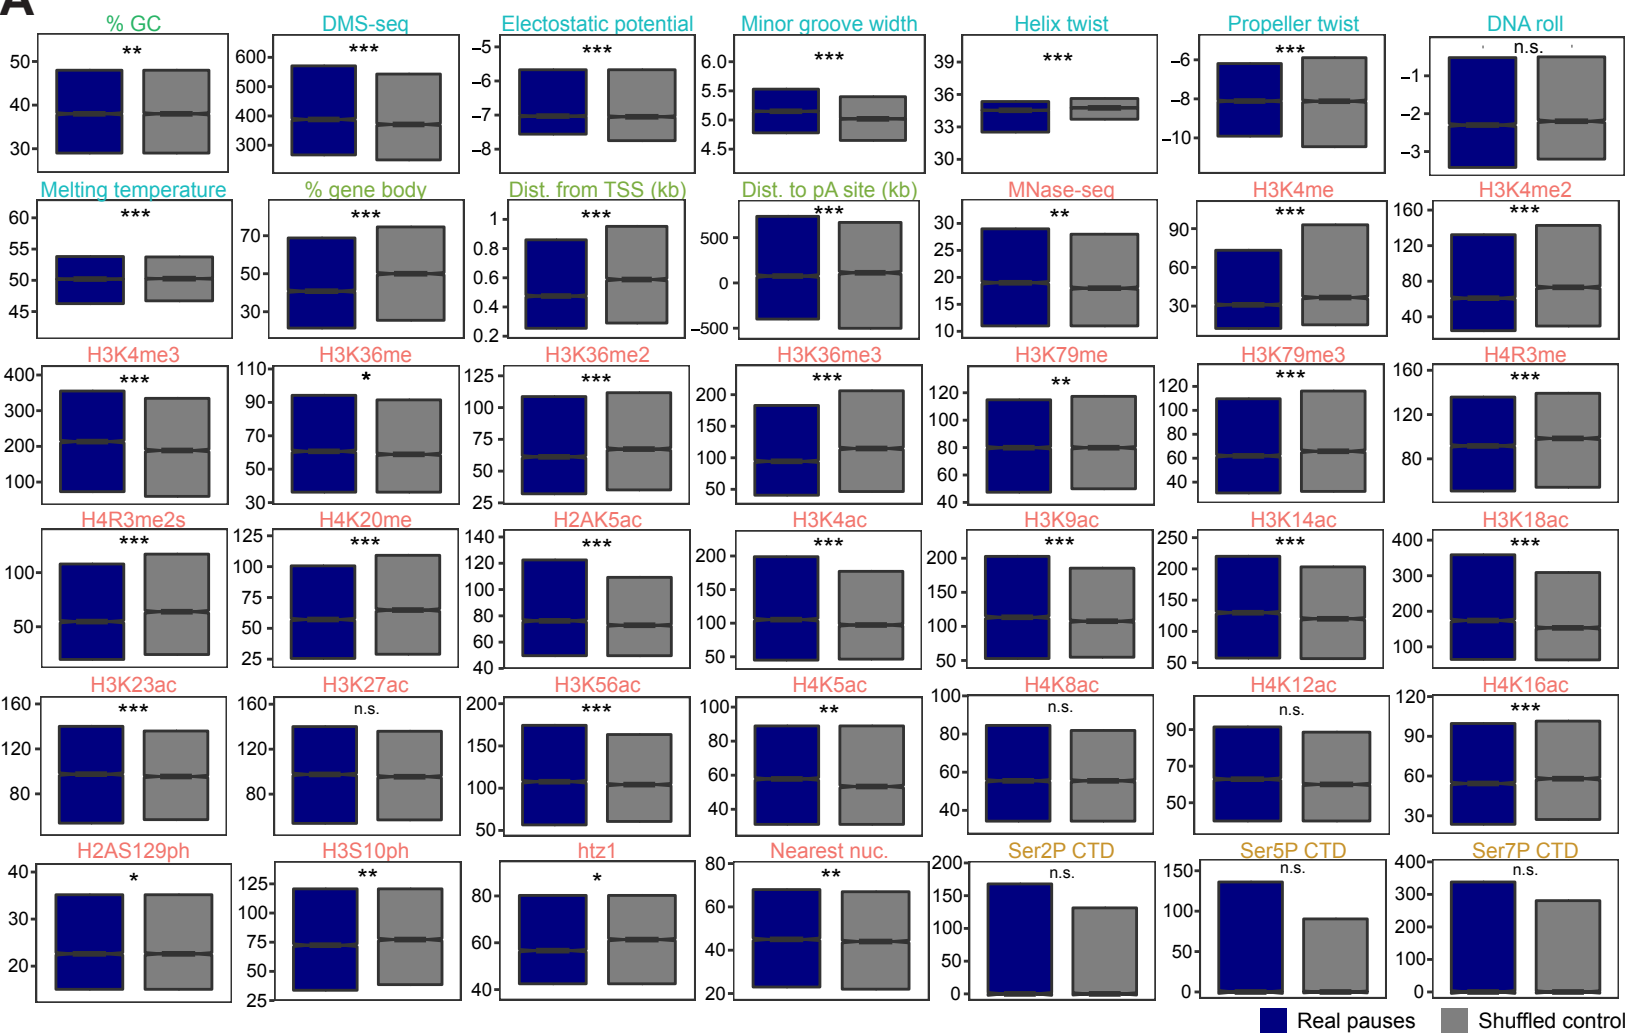**B**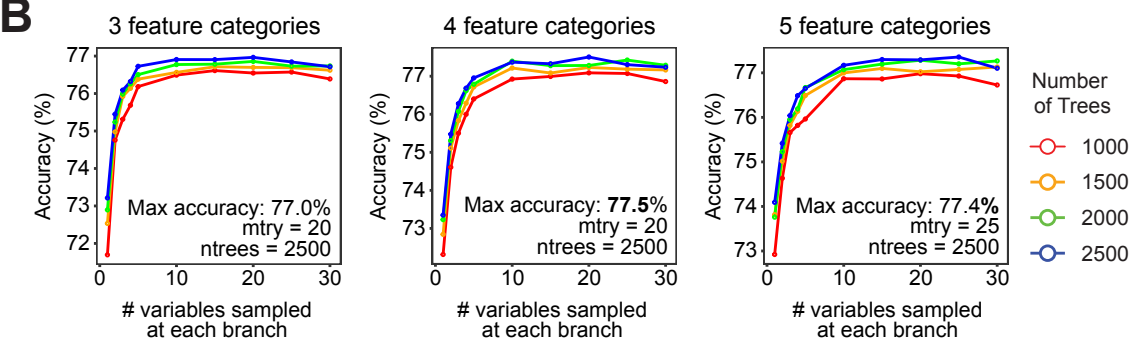

Supplement: supp [file elife-78944-supp-v1.zip]

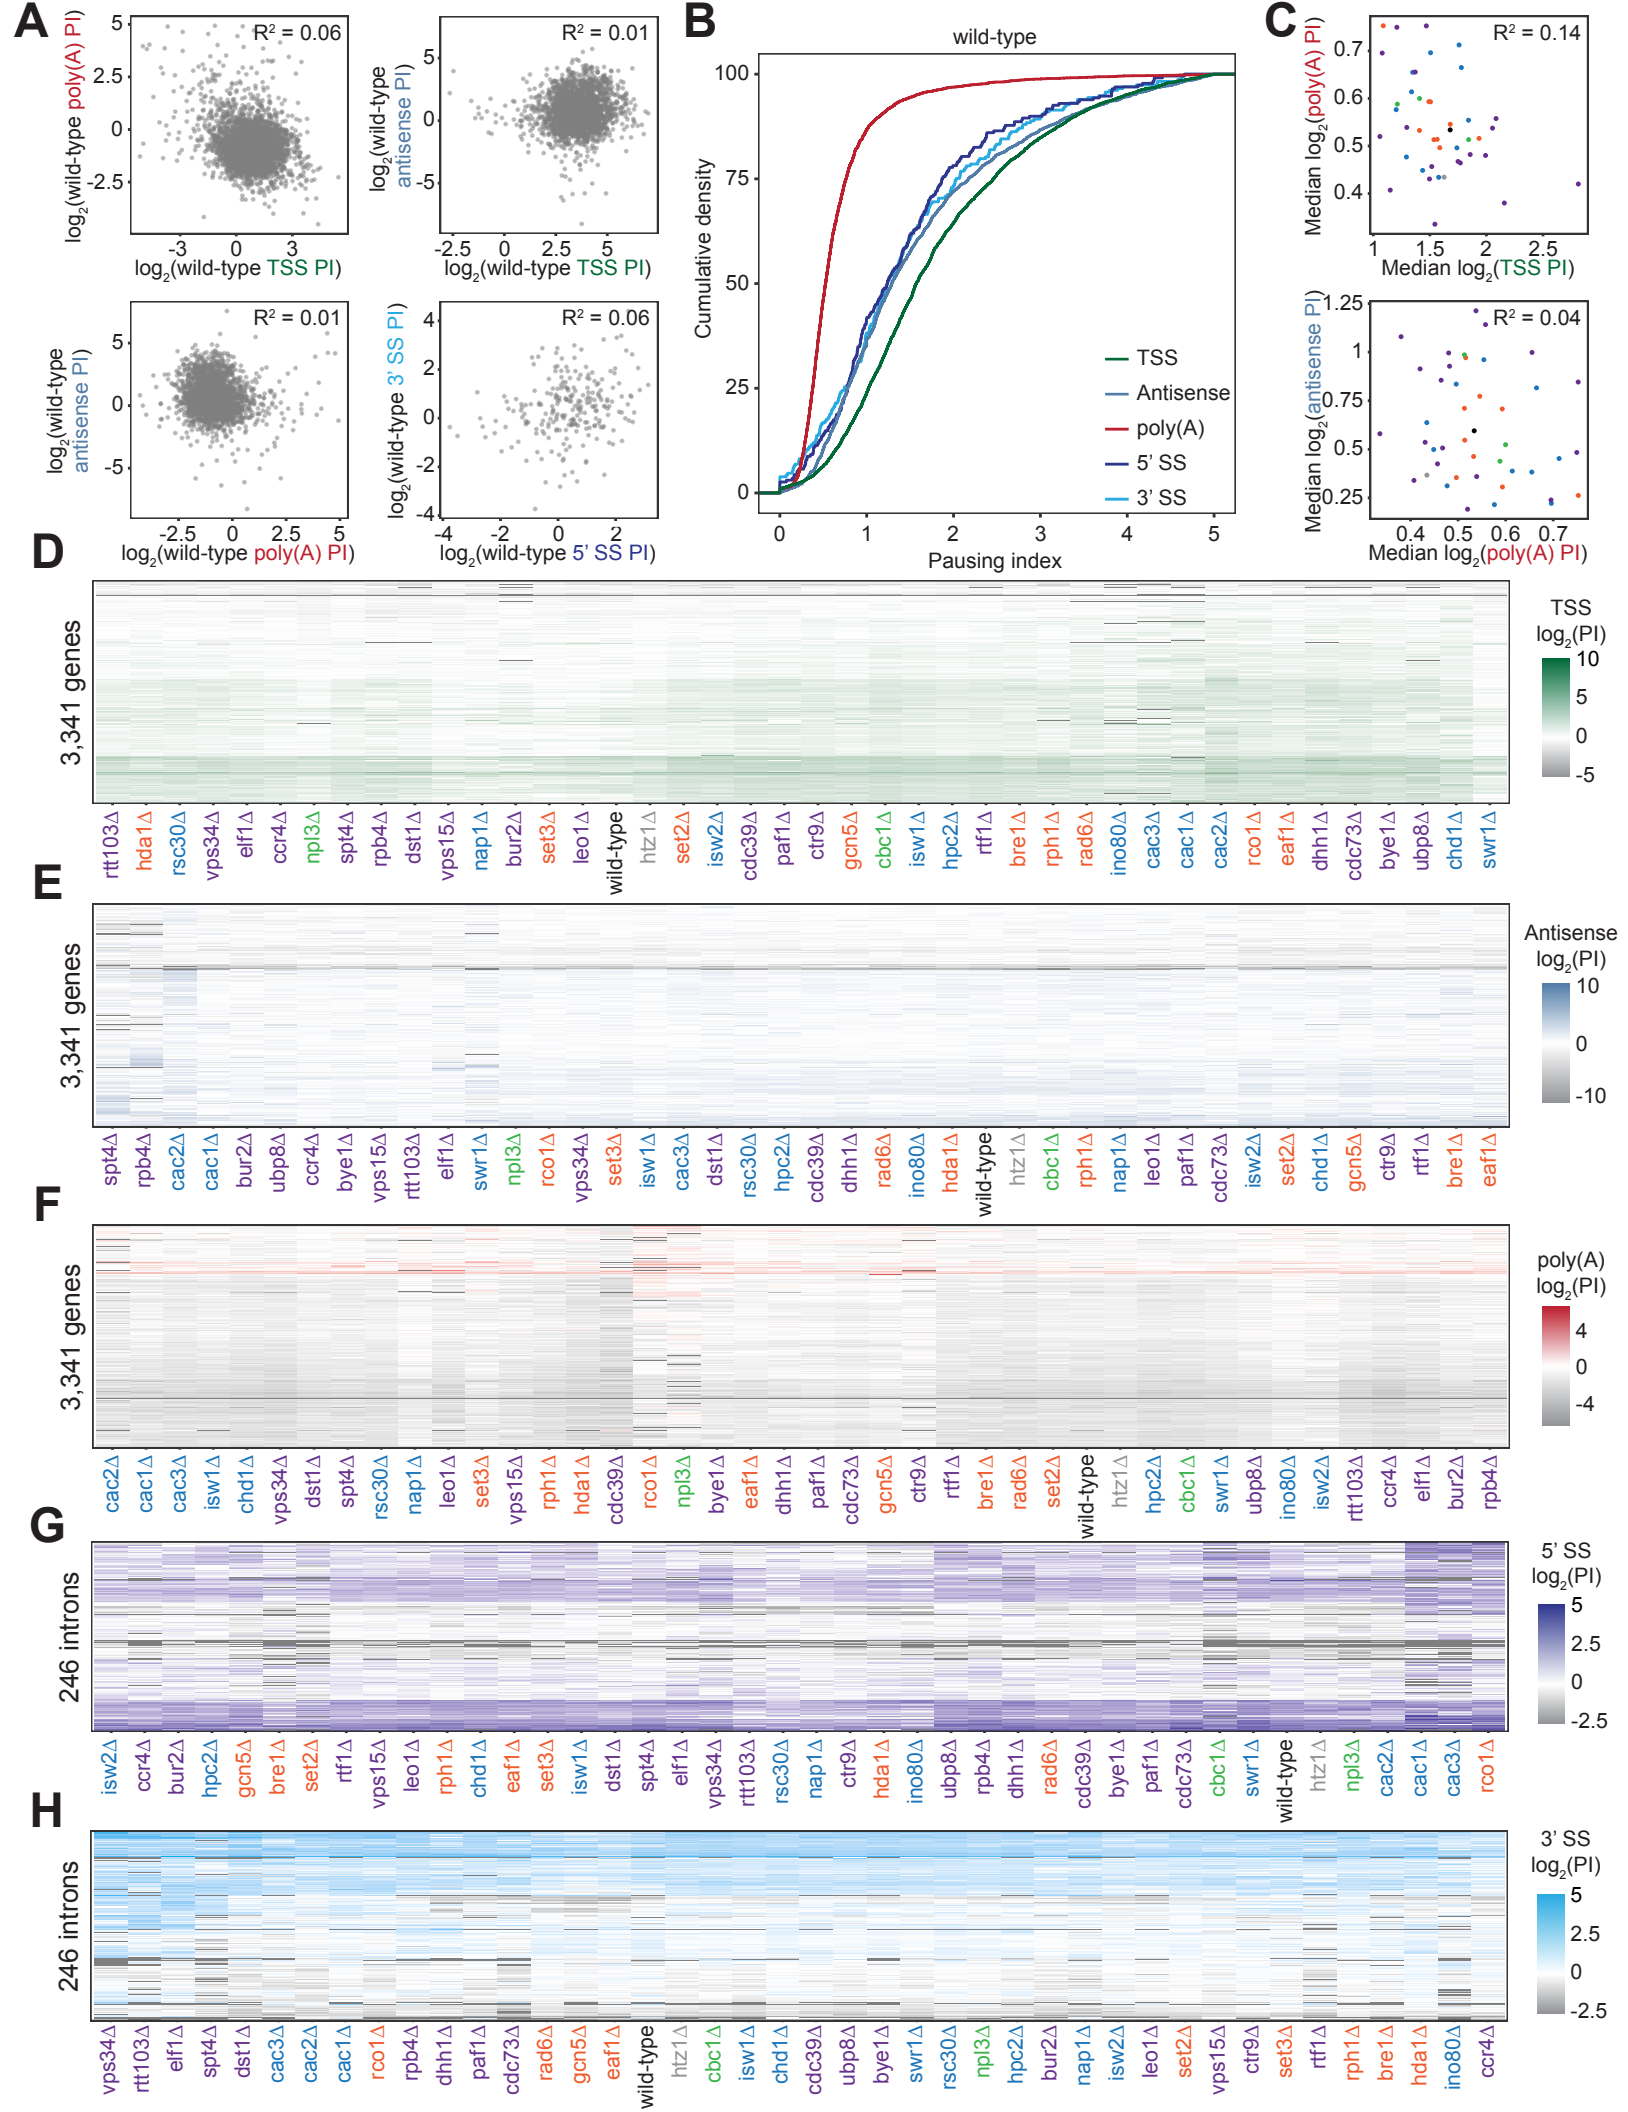

Supplement: supp [file elife-78944-supp-v1.zip]
